# Supplementary material for: RNA-Seq-based transcriptome analysis of methicillin-resistant Staphylococcus aureus biofilm inhibition by ursolic acid and resveratrol
Source: PubMed Central journal article supplement — Sci Rep. 2014 Jun 27;4:5467. doi: 10.1038/srep05467 (PMC4073122; doi:10.1038/srep05467), 2014-06-27
Supplement: srep05467-s1.pdf [file srep05467-s1.pdf]

## SUPPLEMENTARY FILE

### **RNA-Seq-based transcriptome analysis of methicillin-resistant *Staphylococcus aureus* biofilm inhibition by ursolic acid and resveratrol**

Nan Qin<sup>1, §</sup>, Xiaojuan Tan<sup>2, §</sup>, Yinming Jiao<sup>3, §</sup>, Lin Liu<sup>1, 4</sup>, Wangsheng Zhao<sup>5</sup>, Shuang Yang<sup>4</sup>, Aiqun Jia<sup>2, \*</sup>

<sup>1</sup> State Key Laboratory for Diagnosis and Treatment of Infectious Disease, the First Affiliated Hospital, Zhejiang University, Hangzhou 310003, China

<sup>2</sup> School of Environmental and Biological Engineering, Nanjing University of Science and Technology, Nanjing 210094, China

<sup>3</sup> Department of Bioinformatics, State Key Laboratory of Plant Physiology and Biochemistry, College of Life Sciences, Zhejiang University, Hangzhou 310058, China

<sup>4</sup> NGS Sequencing Department, Beijing Genomics Institute (BGI), Shenzhen 518083, China

<sup>5</sup> Clinical Laboratory Department of the First Affiliated Hospital, Nanjing Medical University, Nanjing 210029, China

§ These three authors contributed equally to this work

\* Corresponding author

Correspondence and requests for materials should be addressed to Aiqun Jia (email:

[jiaaiqun@gmail.com](mailto:jiaaiqun@gmail.com)).

## Supplementary materials

### Procedures of using RNeasy Mini Kit to purify MRSA total RNA:

1. Prepare TE buffer (30 mM Tris·Cl, 1 mM EDTA, pH 8.0) containing 20 mg/mL lysozyme and 12.5 µg/mL lysostaphin.
2. Add 200µL Proteinase K and 200 µL TE buffer (step 1) to the pellet treated by RNA Protect solution.
3. Mix by vortexing for 10 s. Incubate in the bath at 37°C for 1 h. During incubation, vortex for 10 s at least every 5-10 min.
4. Add 700 µL Buffer RLT (Ensure that β-mercaptoethanol is added to Buffer RLT before use). Vortex vigorously for 5–10 s. Centrifuge for 2 min at maximum speed. Transfer supernatant into a new tube.
5. Add 500 µL ethanol (100%). Mix well by pipetting. Do not centrifuge.
6. Transfer up to 700 µL lysate, including any precipitate that may have formed, to an RNeasy Mini spin column placed in a 2 ml collection tube. Close the lid gently, and centrifuge for 15 s at 12,000 ×g. Discard the flow-through. Reuse the collection tube in step 7. If the lysate exceeds 700 µL, centrifuge successive aliquots through the spin column. Discard the flow-through after each centrifugation.
7. Add 350 µL Buffer RW1 to the RNeasy Mini spin column. Close the lid gently, and centrifuge for 15 s at 12,000 ×g to wash the spin column membrane. Discard the flow-through and collection tube.
8. Add 80µL DNase I solution to the RNeasy Mini spin column. Incubate at room temperature

- (15–25°C) for 15 min.
9. Add 350  $\mu\text{L}$  Buffer RW1 to the RNeasy Mini spin column. Incubate at room temperature (15–25°C) for 5 min. Discard the flow-through and collection tube.
  10. Place the RNeasy Mini spin column in a new 2 ml collection tube. Add 500  $\mu\text{L}$  Buffer RPE (Ensure that ethanol is added to RPE buffer before use) to the RNeasy Mini spin column. Close the lid gently, and centrifuge for 15 s at 12,000  $\times g$  to wash the spin column membrane. Discard the flow-through. Reuse the collection tube in step 11.
  11. Add 500  $\mu\text{L}$  Buffer RPE to the RNeasy Mini spin column. Close the lid gently, and centrifuge for 15 s at 12,000  $\times g$  to wash the spin column membrane. Discard the flow-through. Reuse the collection tube.
  12. Centrifuge for 2 min at maximum speed, ensures that no ethanol is carried.
  13. Place the RNeasy Mini spin column in a new 1.5 mL collection tube. Open the lid and incubate at room temperature (15–25°C) for 2 min. Add 30  $\mu\text{L}$  preheated RNA storage solution directly to the spin column membrane. Close the lid gently and incubate at room temperature (15–25°C) for 2 min. Centrifuge for 1 min at 12,000  $\times g$  to elute the RNA.
  14. Suction out the elutate and then add to the RNeasy Mini spin column. Close the lid gently and incubate at room temperature (15–25°C) for 2 min. Centrifuge for 1 min at 12,000  $\times g$ . The collection solution is the total RNA.

# Supplementary figures

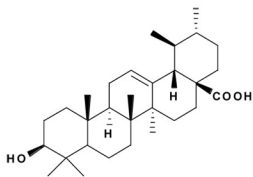

**a**

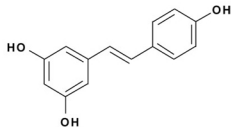

**b**

## Supplementary Figure S1. Structures of ursolic acid (a) and resveratrol (b).

Ursolic acid is a relatively nontoxic active ingredient of many medicinal and edible plants and has a broad range of pharmacology effects, including protection against liver injury, anti-tumor activity, inhibition of mutagenesis in bacteria, anti-inflammation, and anti-ulcer activity<sup>25</sup>. Resveratrol also has lots important pharmacology effects, such as anticancer, antioxidation, anti-aging, immunoregulation, anti-inflammation, and anti-bacterial activity<sup>36</sup>. A few literatures reported that resveratrol is QSI, but its quorum sensing inhibitory rate was low<sup>37</sup>. Recent studies showed that ursolic acid inhibited *E. coli* biofilm formation without interfering with quorum sensing<sup>25</sup>.



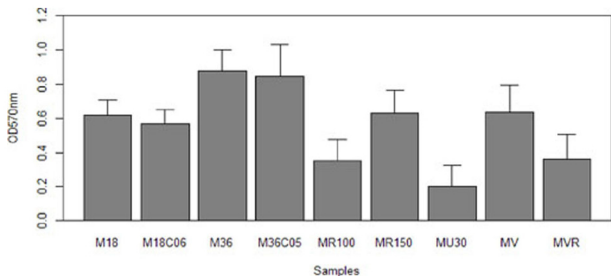

**Supplementary Figure S2. Inhibition the clinical MRSA isolate biofilm by the addition of**

**ursolic acid, resveratrol, and vancomycin.** For M18C06, MU30, and MR100, data were

collected 18 h after the addition of ethanol (0.6% [v/v]), ursolic acid (30 µg/mL), and resveratrol

(100µg/mL) in TSB medium, respectively. For M18, data were collected 18 h without treatment

and as control in the inhibiting biofilm formation inhibitions. For M36C05, MV, MVR, and

MR150, data were collected 18 h after the addition of ethanol (0.5% [v/v]), vancomycin (8

µg/mL), the combination of vancomycin (8 µg/mL) and resveratrol (150 µg/mL), and resveratrol

(150 µg/mL) in the TSB medium when biofilms were cultured for 18 h, respectively. For M36,

data were collected 36 h and changed fresh TSB medium every 18 h and as control in the

removing established biofilm conditions. M18C06 and M36C05 were used to observe the effects

of solvent on biofilms. At least three independent experiments were conducted, and the error bars

indicate one standard deviation. Values treated with ursolic acid, resveratrol or vancomycin are

significantly different from the untreated control (P value < 0.05 assigned using Student's t-test).

However, values only treated with ethanol are not significantly different from the control without

ethanol (P value > 0.05 assigned using Student's t-test).

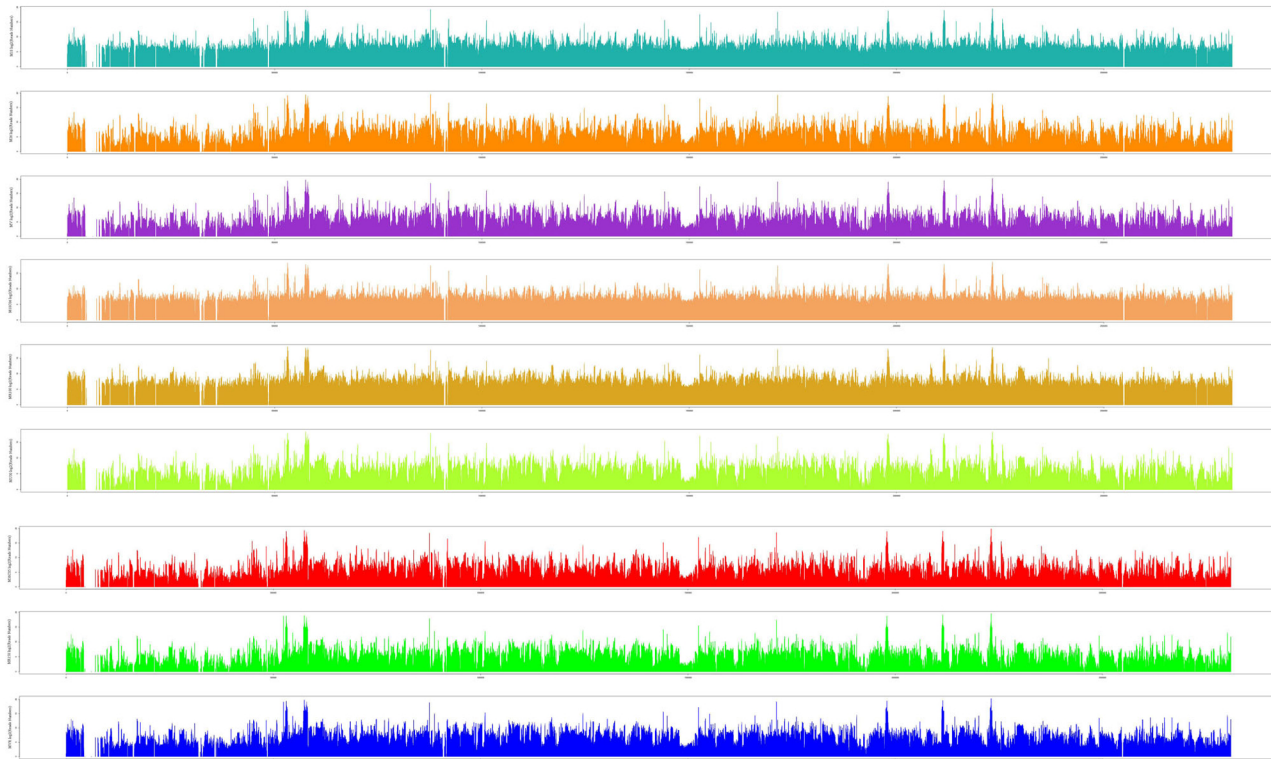

**Supplementary Figure S3. The distribution of reads randomly mapped along the relative position in the genome (5' → 3') in each sample.**

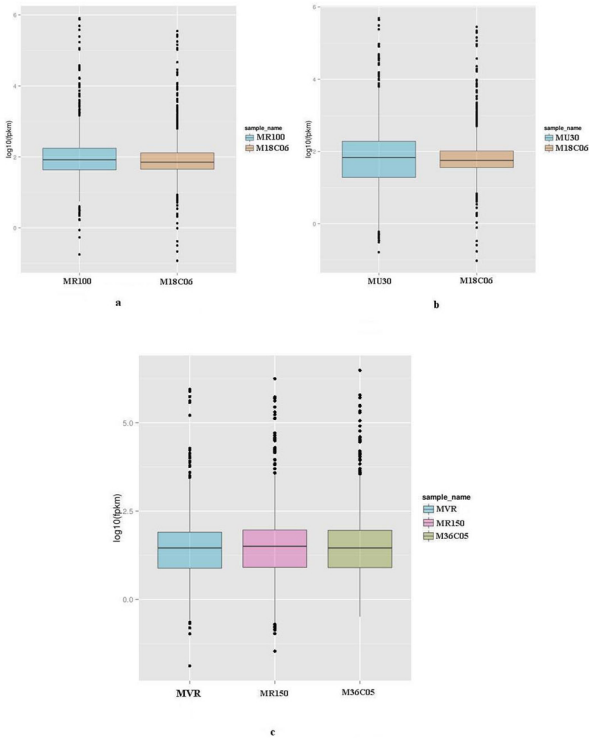

**Supplementary Figure S4. Boxplots of the expression distribution for all methicillin-resistant**

***Staphylococcus aureus* (MRSA) genes under the different conditions.** The 5<sup>th</sup> percentile

(bottom edge of the vertical line), 25<sup>th</sup> percentile (bottom edge of the box), median (black line),

75<sup>th</sup> percentile (top edge of the box), 95<sup>th</sup> percentile (top edge of the vertical line), and the number

of the outlier points (above and below the vertical lines) were described in [Supplementary Table](#)

[S18](#). (a) Resveratrol inhibiting MRSA biofilm formation condition compared with control

(M18C06) condition; (b) ursolic acid inhibiting MRSA biofilm formation condition compared

with the control (M18C06) condition; and (c) resveratrol and combination with vancomycin

inhibiting established MRSA biofilm conditions compared with the control (M36C05) condition.

Chemically, resveratrol had no correlation with ursolic acid, so we performed the differential expression analyses separately.

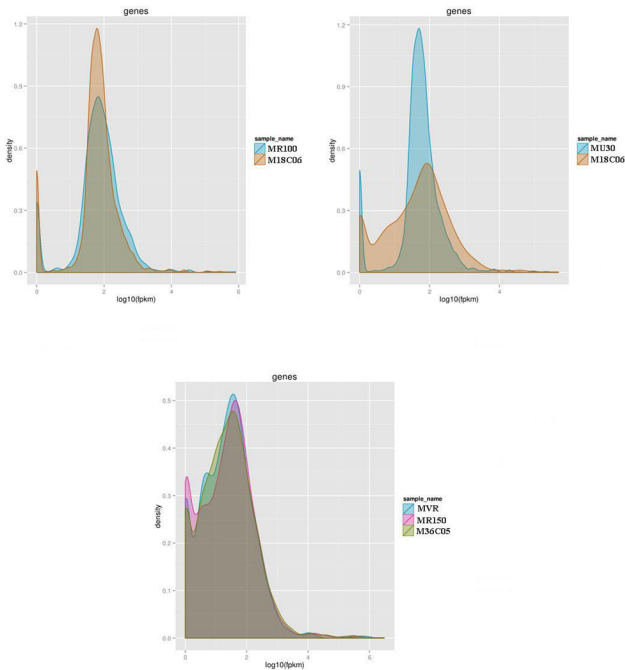

**Supplementary Figure S5. Density plots of the expression level distribution for all methicillin-resistant *Staphylococcus aureus* (MRSA) genes in each condition. FPKM, fragments per kilobase of transcript per million fragments mapped. Chemically, resveratrol had no correlation with ursolic acid, so we performed the differential expression analyses separately.**

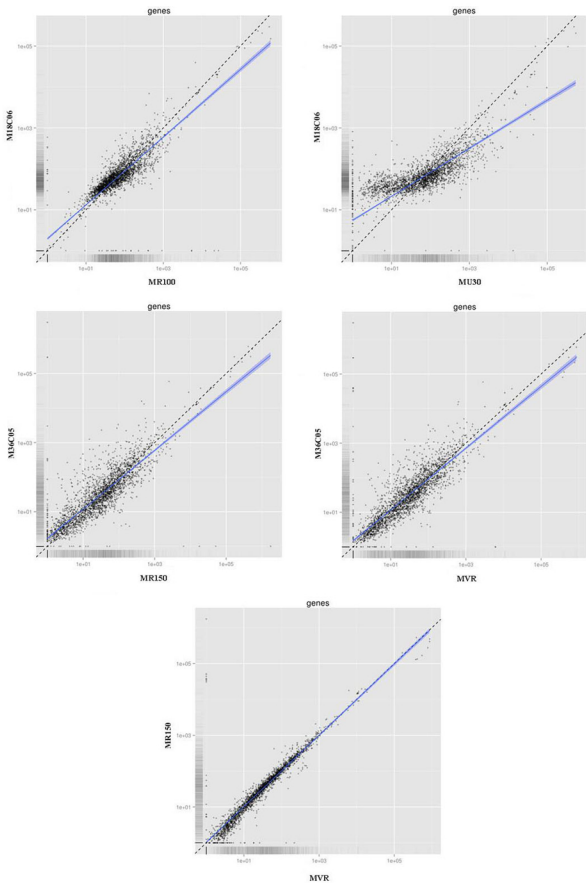

**Supplementary Figure S6. Scatter plots of the expression level distribution for all methicillin-resistant *Staphylococcus aureus* (MRSA) genes between two samples of each condition.**

MR100 vs M18C06    MR100 vs MU30

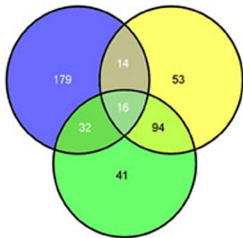

MU30 vs M18C06

a

MR150 vs M36C05    MVR vs MR150

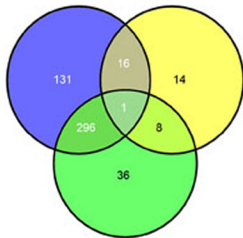

MVR vs M36C05

b

**Supplementary Figure S7. Venn diagrams of the differentially expressed genes after methicillin-resistant *Staphylococcus aureus* (MRSA) was treated with different compounds under different conditions. (a) Inhibitory conditions; and (b) removed conditions.**

## MVR vs MR150

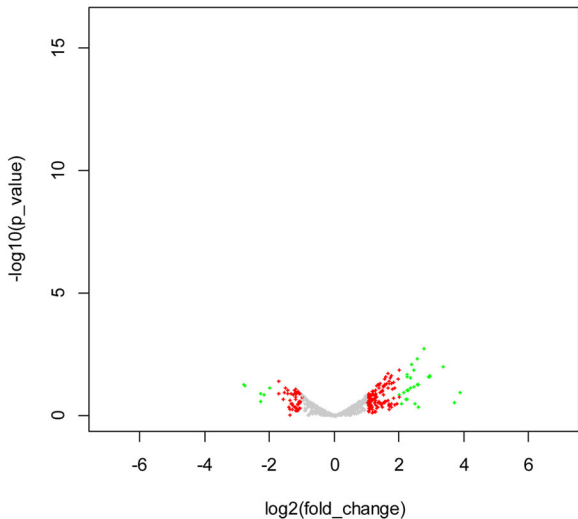

Supplementary Figure S8. Volcano plots of the expression level distribution for all methicillin-resistant *Staphylococcus aureus* (MRSA) genes in MVR compared with MR150.

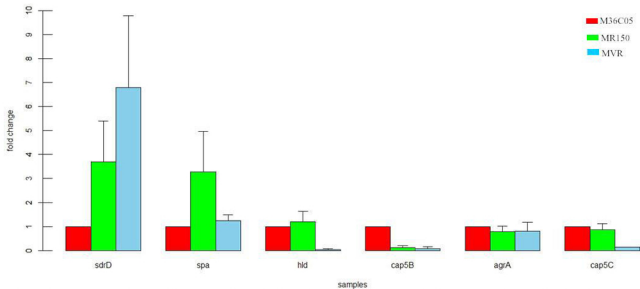

**Supplementary Figure S9. Real-time PT-PCR quantification of the expression of indicated**

**genes in M36C05, MR150, and MVR samples.** The values are an average of two to three

replications using the standard curve method, and the data are expressed as the ratio of the number

of gene copies of MR150/M36C05 or MVR/M36C05. Genes with a ratio of >1 are up-regulated in

the MR150 or MVR samples.



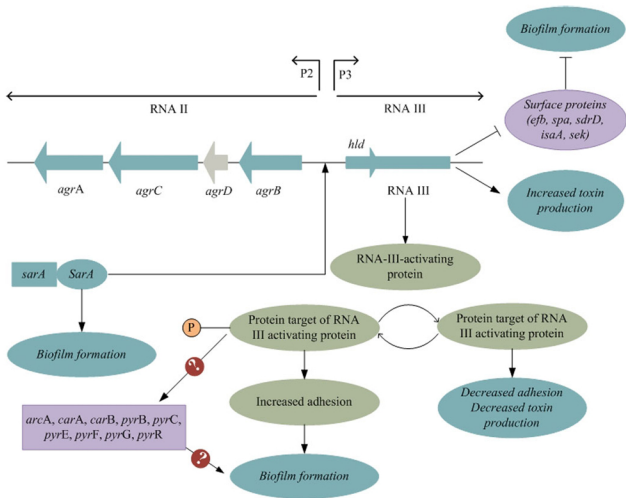

**Supplementary Figure S10. The relationship between quorum sensing and biofilm in *Staphylococcus aureus*.** Dark green and purple correspond to down-regulated and up-regulated genes, respectively. “?” indicates that the RNA-seq results are contradictory to the microarray results.

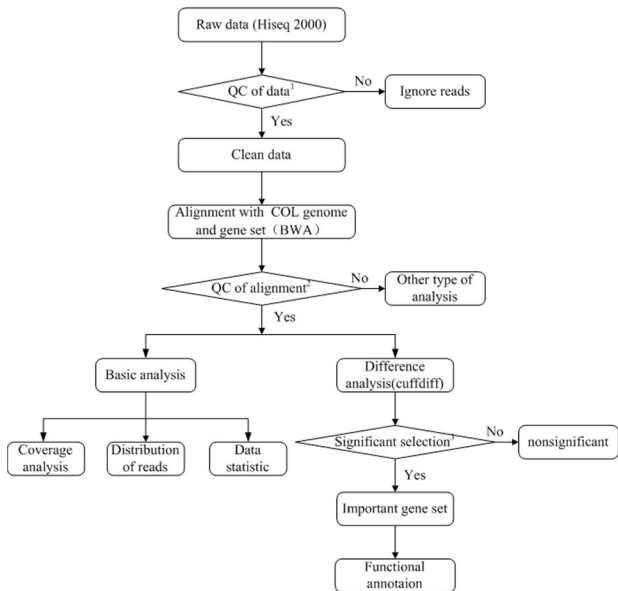

<sup>1</sup> QC of raw data:  
 removed pair-end reads which satisfied  $N > 2\%$  or low quality base (quality value  $< 20$ )  $> 50\%$ ;  
 cutoff the reads which terminal 20bp is N or low quality base.

<sup>2</sup> QC of alignment:  
 unmapped reads and incorrect alignment:

<sup>3</sup> Significant selection:  
 $\text{fold} > 2$ ,  $p \text{ value} < 0.05$  and  $\text{FDR} < 0.001$

**Supplementary Figure S11. RNA-seq data analysis workflow for intergenic expression analyses.**

## Supplementary Tables

**Table S1. Effects of ursolic acid at different concentrations on the MRSA biofilm**

| Concentration ( $\mu\text{g/mL}$ ) | Growth <sup>1</sup> | Biofilm formation <sup>2</sup> | Condition                                           |
|------------------------------------|---------------------|--------------------------------|-----------------------------------------------------|
| 20                                 | 57.4 $\pm$ 6.07     | 105.4 $\pm$ 5.5                | Inhibiting biofilm formation condition <sup>3</sup> |
| 25                                 | 37.3 $\pm$ 5.36     | 65.5 $\pm$ 16.3                |                                                     |
| 30                                 | 13.0 $\pm$ 7.21     | 33.7 $\pm$ 17.84               |                                                     |
| 30                                 | — <sup>5</sup>      | 102.4 $\pm$ 4.88               | Removing established biofilm condition <sup>4</sup> |
| 60                                 | —                   | 103.3 $\pm$ 4.79               |                                                     |
| 90                                 | —                   | 98.7 $\pm$ 4.20                |                                                     |
| 120                                | —                   | 100.5 $\pm$ 6.46               |                                                     |
| 150                                | —                   | 97.3 $\pm$ 2.48                |                                                     |

Values treated with ursolic acid are significantly different from the untreated control (P value < 0.05 assigned using Student's t-test).

<sup>1</sup> MRSA growth values were calculated as: (mean OD<sub>600nm</sub> treated well)/ (mean OD<sub>600nm</sub> untreated well)  $\times$ 100. Values are expressed as means  $\pm$ SD.

<sup>2</sup> Biofilm formation values were calculated as: (mean OD<sub>570nm</sub> treated well)/ (mean OD<sub>570nm</sub> untreated well)  $\times$ 100. Values are expressed as means  $\pm$ SD.

<sup>3</sup> Each well contained 0.6% [v/v] ethanol.

<sup>4</sup> Each well contained 3.0% [v/v] ethanol. the absorbance at OD<sub>570nm</sub> was measured.

<sup>5</sup> '—' expresses that the absorbance at OD<sub>600nm</sub> was not measured.

**Table S2. Effects of resveratrol at different concentrations on the MRSA biofilm**

| Concentration ( $\mu\text{g/mL}$ ) | Growth <sup>1</sup> | Biofilm formation <sup>2</sup> | Condition                                           |
|------------------------------------|---------------------|--------------------------------|-----------------------------------------------------|
| 75                                 | 83.8 $\pm$ 7.09     | 75.43 $\pm$ 1.85               | Inhibiting biofilm formation condition <sup>3</sup> |
| 100                                | 69.6 $\pm$ 8.00     | 60.15 $\pm$ 15.38              |                                                     |
| 150                                | 22.1 $\pm$ 2.29     | 36.86 $\pm$ 4.37               |                                                     |
| 200                                | 6.3 $\pm$ 0.39      | 6.04 $\pm$ 0.69                |                                                     |
| 100                                | — <sup>4</sup>      | 72.59 $\pm$ 9.21               | Removing established biofilm condition <sup>3</sup> |
| 150                                | —                   | 68.74 $\pm$ 10.45              |                                                     |
| 200                                | —                   | 69.74 $\pm$ 12.87              |                                                     |

Values treated with resveratrol are significantly different from the untreated control (P value < 0.05 assigned using Student's t-test).

<sup>1</sup> MRSA growth values were calculated as: (mean OD<sub>600nm</sub> treated well)/ (mean OD<sub>600nm</sub> untreated well)  $\times$ 100. Values are expressed as means  $\pm$ SD.

<sup>2</sup> Biofilm formation values were calculated as: (mean OD<sub>570nm</sub> treated well)/ (mean OD<sub>570nm</sub> untreated well)  $\times$ 100. Values are expressed as means  $\pm$ SD.

<sup>3</sup> Each well contained 0.67% [v/v] ethanol.

<sup>4</sup> '—' expresses that the absorbance at OD<sub>600nm</sub> was not measured.

**Supplementary Table S3. Ursolic acid and resveratrol minimal inhibitory concentration (MICs) and minimal bactericidal concentration (MBCs) of MRSA isolate**

|              | MIC ( $\mu\text{g/mL}$ ) | MBC ( $\mu\text{g/mL}$ ) |
|--------------|--------------------------|--------------------------|
| Ursolic acid | 37                       | 175                      |
| Resveratrol  | 350                      | >800                     |

**Supplementary Table S4. Results of Cuffdiff analysis of RNA-seq data for all annotated MRSA genes in MR100 and M18C06, related to Figure 2a**

| test_id  | gene_id  | gene      | locus                                        | MR100 | M18C06 | status | FPKM(MR100) | FPKM(M18C06) | log2(fold change) | test_stat  | p_value   | q_value  |
|----------|----------|-----------|----------------------------------------------|-------|--------|--------|-------------|--------------|-------------------|------------|-----------|----------|
| gene0    | gene0    | dnaA      | gi 57650036 ref NC_002951.2 :543-1905        | q1    | q2     | OK     | 243.243     | 67.5088      | -1.84925          | 2.42054    | 0.0154975 | 0.288253 |
| gene1    | gene1    | dnaN      | gi 57650036 ref NC_002951.2 :2182-3316       | q1    | q2     | OK     | 169.654     | 86.1904      | -0.976998         | 1.46982    | 0.14161   | 0.771329 |
| gene10   | gene10   | SACOL0011 | gi 57650036 ref NC_002951.2 :14748-15770     | q1    | q2     | OK     | 53.9205     | 54.7053      | 0.0208475         | -0.01864   | 0.985125  | 0.998143 |
| gene100  | gene100  | SACOL0104 | gi 57650036 ref NC_002951.2 :115668-124110   | q1    | q2     | OK     | 22.1188     | 26.3766      | 0.253985          | -0.10542   | 0.91604   | 0.996932 |
| gene1000 | gene1000 | SACOL1014 | gi 57650036 ref NC_002951.2 :1021518-1023363 | q1    | q2     | OK     | 102.57      | 67.8628      | -0.59591          | 0.8432     | 0.399118  | 0.939607 |
| gene1001 | gene1001 | fabI      | gi 57650036 ref NC_002951.2 :1023640-1024411 | q1    | q2     | OK     | 331.158     | 115.766      | -1.51631          | 2.20362    | 0.0275514 | 0.380118 |
| gene1002 | gene1002 | SACOL1017 | gi 57650036 ref NC_002951.2 :1024605-1025691 | q1    | q2     | OK     | 87.5033     | 51.3876      | -0.767916         | 1.45411    | 0.145915  | 0.783746 |
| gene1003 | gene1003 | SACOL1018 | gi 57650036 ref NC_002951.2 :1026032-1027601 | q1    | q2     | OK     | 75.9721     | 80.9917      | 0.0923055         | -0.14649   | 0.883539  | 0.996932 |
| gene1004 | gene1004 | SACOL1019 | gi 57650036 ref NC_002951.2 :1027742-1028501 | q1    | q2     | OK     | 84.4742     | 86.7393      | 0.0381752         | -0.07623   | 0.939237  | 0.996932 |
| gene1005 | gene1005 | SACOL1020 | gi 57650036 ref NC_002951.2 :1028694-1029204 | q1    | q2     | OK     | 746.953     | 475.128      | -0.652701         | 0.79969    | 0.423889  | 0.93986  |
| gene1006 | gene1006 | SACOL1021 | gi 57650036 ref NC_002951.2 :1029316-1031660 | q1    | q2     | OK     | 71.4971     | 55.8734      | -0.355722         | 0.24102    | 0.809537  | 0.991128 |
| gene1007 | gene1007 | ypfP      | gi 57650036 ref NC_002951.2 :1029316-1031660 | q1    | q2     | OK     | 159.821     | 125.017      | -0.354327         | 0.35636    | 0.721571  | 0.986963 |
| gene1008 | gene1008 | murE      | gi 57650036 ref NC_002951.2 :1032092-1035380 | q1    | q2     | OK     | 114.202     | 64.5311      | -0.823523         | 0.63045    | 0.528398  | 0.97289  |
| gene1009 | gene1009 | SACOL1024 | gi 57650036 ref NC_002951.2 :1032092-1035380 | q1    | q2     | OK     | 172.2       | 89.5272      | -0.943684         | 0.2123     | 0.831876  | 0.994686 |
| gene101  | gene101  | SACOL0105 | gi 57650036 ref NC_002951.2 :115668-124110   | q1    | q2     | OK     | 36.1182     | 44.1575      | 0.289932          | -0.15685   | 0.87536   | 0.996932 |
| gene1010 | gene1010 | prfC      | gi 57650036 ref NC_002951.2 :1032092-1035380 | q1    | q2     | OK     | 118.347     | 69.1757      | -0.77468          | 0.62641    | 0.531044  | 0.97289  |
| gene1011 | gene1011 | SACOL1026 | gi 57650036 ref NC_002951.2 :1035681-1036485 | q1    | q2     | OK     | 71.9299     | 45.1242      | -0.67269          | 1.37655    | 0.168651  | 0.814226 |
| gene1012 | gene1012 | SACOL1027 | gi 57650036 ref NC_002951.2 :1036543-1036639 | q1    | q2     | NOTEST | 0           | 0            | 0                 | 0          | 1         | 1        |
| gene1013 | gene1013 | htrA      | gi 57650036 ref NC_002951.2 :1036718-1039028 | q1    | q2     | OK     | 45.9495     | 55.6402      | 0.276079          | -0.43956   | 0.660257  | 0.986963 |
| gene1014 | gene1014 | SACOL1030 | gi 57650036 ref NC_002951.2 :1039044-1040403 | q1    | q2     | OK     | 77.0431     | 55.9886      | -0.460534         | 0.82569    | 0.408982  | 0.939607 |
| gene1015 | gene1015 | SACOL1031 | gi 57650036 ref NC_002951.2 :1040541-1042053 | q1    | q2     | OK     | 123.616     | 70.1384      | -0.817593         | 1.20428    | 0.22848   | 0.858851 |
| gene1018 | gene1018 | SACOL1032 | gi 57650036 ref NC_002951.2 :1042539-1043070 | q1    | q2     | OK     | 25.8815     | 43.2817      | 0.741838          | -1.44018   | 0.149815  | 0.788621 |
| gene1019 | gene1019 | SACOL1033 | gi 57650036 ref NC_002951.2 :1043318-1043537 | q1    | q2     | OK     | 1962.31     | 2018.54      | 0.0407612         | -0.06911   | 0.944904  | 0.996932 |
| gene102  | gene102  | SACOL0106 | gi 57650036 ref NC_002951.2 :115668-124110   | q1    | q2     | OK     | 66.3766     | 72.9864      | 0.136951          | -0.05977   | 0.952338  | 0.996932 |
| gene1020 | gene1020 | SACOL1034 | gi 57650036 ref NC_002951.2 :1043617-1044604 | q1    | q2     | OK     | 71.523      | 71.1952      | -0.006626         | 0.0129     | 0.989706  | 0.998143 |
| gene1021 | gene1021 | SACOL1035 | gi 57650036 ref NC_002951.2 :1044802-1044979 | q1    | q2     | OK     | 114.372     | 157.152      | 0.458425          | -0.63922   | 0.522679  | 0.972546 |
| gene1022 | gene1022 | SACOL1036 | gi 57650036 ref NC_002951.2 :1044993-1045596 | q1    | q2     | OK     | 146.301     | 182.801      | 0.321337          | -0.59802   | 0.549826  | 0.979019 |
| gene1023 | gene1023 | SACOL1037 | gi 57650036 ref NC_002951.2 :1045867-1045975 | q1    | q2     | OK     | 0           | 700.131      | 1.79769e+3        | 1.79769e+0 | 0.18455   | 0.819812 |
| gene1024 | gene1024 | SACOL1038 | gi 57650036 ref NC_002951.2 :1046940-1048905 | q1    | q2     | OK     | 27.4208     | 40.885       | 0.576299          | -1.10514   | 0.269098  | 0.875983 |

|          |          |           |                                              |    |    |        |         |         |           |          |           |          |
|----------|----------|-----------|----------------------------------------------|----|----|--------|---------|---------|-----------|----------|-----------|----------|
| gene1025 | gene1025 | SACOL1039 | gi 57650036 ref NC_002951.2 :1048907-1049866 | q1 | q2 | OK     | 15.992  | 36.286  | 1.18207   | -1.00472 | 0.315033  | 0.892668 |
| gene1026 | gene1026 | SACOL1040 | gi 57650036 ref NC_002951.2 :1048907-1049866 | q1 | q2 | OK     | 29.8292 | 40.0206 | 0.424015  | -0.78312 | 0.433559  | 0.940247 |
| gene1027 | gene1027 | SACOL1041 | gi 57650036 ref NC_002951.2 :1049953-1050244 | q1 | q2 | OK     | 15.1786 | 26.7655 | 0.818334  | -1.13777 | 0.255218  | 0.875983 |
| gene1028 | gene1028 | SACOL1042 | gi 57650036 ref NC_002951.2 :1050522-1050810 | q1 | q2 | OK     | 57.3791 | 35.0189 | -0.712394 | 1.19408  | 0.232446  | 0.863102 |
| gene1029 | gene1029 | SACOL1043 | gi 57650036 ref NC_002951.2 :1050815-1052297 | q1 | q2 | OK     | 53.9753 | 35.9298 | -0.587119 | 1.13426  | 0.256684  | 0.875983 |
| gene103  | gene103  | SACOL0107 | gi 57650036 ref NC_002951.2 :115668-124110   | q1 | q2 | OK     | 32.4264 | 43.1621 | 0.412595  | -0.17299 | 0.862663  | 0.996923 |
| gene1030 | gene1030 | SACOL1044 | gi 57650036 ref NC_002951.2 :1052385-1052742 | q1 | q2 | OK     | 30.1651 | 39.4327 | 0.386512  | -0.68117 | 0.495761  | 0.964002 |
| gene1031 | gene1031 | SACOL1045 | gi 57650036 ref NC_002951.2 :1053218-1054178 | q1 | q2 | OK     | 48.3843 | 59.0366 | 0.287071  | -0.5845  | 0.558884  | 0.983432 |
| gene1032 | gene1032 | SACOL1046 | gi 57650036 ref NC_002951.2 :1054223-1054355 | q1 | q2 | OK     | 201.068 | 181.145 | -0.150541 | 0.12472  | 0.900743  | 0.996932 |
| gene1033 | gene1033 | SACOL1047 | gi 57650036 ref NC_002951.2 :1054418-1054709 | q1 | q2 | OK     | 121.429 | 118.012 | -0.041185 | 0.08161  | 0.93496   | 0.996932 |
| gene1034 | gene1034 | SACOL1048 | gi 57650036 ref NC_002951.2 :1054852-1055350 | q1 | q2 | OK     | 81.5707 | 119.108 | 0.546152  | -1.12743 | 0.259561  | 0.875983 |
| gene1035 | gene1035 | menA      | gi 57650036 ref NC_002951.2 :1055401-1056340 | q1 | q2 | OK     | 67.8741 | 66.4461 | -0.030678 | 0.06101  | 0.951349  | 0.996932 |
| gene1036 | gene1036 | SACOL1050 | gi 57650036 ref NC_002951.2 :1056490-1056595 | q1 | q2 | NOTEST | 0       | 0       | 0         | 0        | 1         | 1        |
| gene1037 | gene1037 | SACOL1051 | gi 57650036 ref NC_002951.2 :1056671-1061147 | q1 | q2 | OK     | 68.1728 | 71.3078 | 0.0648635 | -0.0262  | 0.979098  | 0.998143 |
| gene1038 | gene1038 | menD      | gi 57650036 ref NC_002951.2 :1056671-1061147 | q1 | q2 | OK     | 97.6333 | 94.9764 | -0.039805 | 0.02277  | 0.981833  | 0.998143 |
| gene1039 | gene1039 | SACOL1053 | gi 57650036 ref NC_002951.2 :1056671-1061147 | q1 | q2 | OK     | 81.3991 | 78.9673 | -0.043757 | 0.01479  | 0.988196  | 0.998143 |
| gene104  | gene104  | SACOL0108 | gi 57650036 ref NC_002951.2 :124113-124878   | q1 | q2 | OK     | 56.4604 | 78.124  | 0.468528  | -0.9576  | 0.338267  | 0.905587 |
| gene1040 | gene1040 | menB      | gi 57650036 ref NC_002951.2 :1056671-1061147 | q1 | q2 | OK     | 302.275 | 191.343 | -0.659698 | 0.39173  | 0.69526   | 0.986963 |
| gene1041 | gene1041 | sspC      | gi 57650036 ref NC_002951.2 :1061385-1061715 | q1 | q2 | OK     | 34.5091 | 30.4915 | -0.178571 | 0.30116  | 0.76329   | 0.986963 |
| gene1042 | gene1042 | sspB1     | gi 57650036 ref NC_002951.2 :1061752-1062934 | q1 | q2 | OK     | 29.7889 | 36.3934 | 0.288901  | -0.59697 | 0.550528  | 0.979019 |
| gene1043 | gene1043 | sspA      | gi 57650036 ref NC_002951.2 :1063015-1064026 | q1 | q2 | OK     | 52.868  | 56.5194 | 0.0963497 | -0.19464 | 0.845675  | 0.996923 |
| gene1044 | gene1044 | SACOL1058 | gi 57650036 ref NC_002951.2 :1064553-1065708 | q1 | q2 | OK     | 108.231 | 63.3827 | -0.771951 | 1.34442  | 0.178812  | 0.819812 |
| gene1045 | gene1045 | SACOL1059 | gi 57650036 ref NC_002951.2 :1065903-1066914 | q1 | q2 | OK     | 37.4882 | 38.6375 | 0.0435649 | -0.09022 | 0.928115  | 0.996932 |
| gene1046 | gene1046 | SACOL1060 | gi 57650036 ref NC_002951.2 :1067066-1067486 | q1 | q2 | OK     | 58.0817 | 27.8608 | -1.05985  | 1.99188  | 0.0463845 | 0.487329 |
| gene1047 | gene1047 | atl       | gi 57650036 ref NC_002951.2 :1067692-1071463 | q1 | q2 | OK     | 185.206 | 336.091 | 0.85972   | -0.78771 | 0.430869  | 0.940181 |
| gene1048 | gene1048 | SACOL1063 | gi 57650036 ref NC_002951.2 :1071690-1072125 | q1 | q2 | OK     | 31.3162 | 36.6871 | 0.228362  | -0.42666 | 0.669627  | 0.986963 |
| gene1049 | gene1049 | SACOL1064 | gi 57650036 ref NC_002951.2 :1072279-1072750 | q1 | q2 | OK     | 376.546 | 263.275 | -0.516253 | 0.86537  | 0.386838  | 0.938503 |
| gene105  | gene105  | SACOL0109 | gi 57650036 ref NC_002951.2 :125073-125481   | q1 | q2 | NOTEST | 0       | 0       | 0         | 0        | 1         | 1        |
| gene1050 | gene1050 | SACOL1065 | gi 57650036 ref NC_002951.2 :1072797-1074015 | q1 | q2 | OK     | 305.408 | 237.082 | -0.365355 | 0.39895  | 0.689934  | 0.986963 |
| gene1051 | gene1051 | SACOL1066 | gi 57650036 ref NC_002951.2 :1074465-1075659 | q1 | q2 | OK     | 60.7977 | 41.9769 | -0.53442  | 1.05511  | 0.291377  | 0.891156 |
| gene1052 | gene1052 | qoxD      | gi 57650036 ref NC_002951.2 :1076195-1076474 | q1 | q2 | OK     | 562.719 | 253.866 | -1.14835  | 2.28619  | 0.0222431 | 0.342403 |
| gene1053 | gene1053 | qoxC      | gi 57650036 ref NC_002951.2 :1076482-1080166 | q1 | q2 | OK     | 683.34  | 314.589 | -1.11914  | 0.35829  | 0.720124  | 0.986963 |
| gene1054 | gene1054 | qoxA      | gi 57650036 ref NC_002951.2 :1076482-1080166 | q1 | q2 | OK     | 794.181 | 395.364 | -1.00629  | 0.72915  | 0.465908  | 0.954237 |

|          |          |           |                                              |    |    |        |         |         |           |          |           |           |
|----------|----------|-----------|----------------------------------------------|----|----|--------|---------|---------|-----------|----------|-----------|-----------|
| gene1055 | gene1055 | qoxB      | gi 57650036 ref NC_002951.2 :1076482-1080166 | q1 | q2 | OK     | 754.382 | 397.762 | -0.923392 | 0.47292  | 0.636272  | 0.986963  |
| gene1056 | gene1056 | SACOL1071 | gi 57650036 ref NC_002951.2 :1080737-1081055 | q1 | q2 | OK     | 125.851 | 61.4854 | -1.0334   | 2.00473  | 0.0449922 | 0.481552  |
| gene1057 | gene1057 | folD      | gi 57650036 ref NC_002951.2 :1081860-1082721 | q1 | q2 | OK     | 256.492 | 268.076 | 0.0637269 | -0.08145 | 0.935083  | 0.996932  |
| gene1058 | gene1058 | purE      | gi 57650036 ref NC_002951.2 :1082921-1084515 | q1 | q2 | OK     | 40.1564 | 76.6194 | 0.932082  | -0.61079 | 0.541336  | 0.979019  |
| gene1059 | gene1059 | purK      | gi 57650036 ref NC_002951.2 :1082921-1084515 | q1 | q2 | OK     | 54.6651 | 129.819 | 1.24781   | -1.80892 | 0.0704635 | 0.590463  |
| gene106  | gene106  | SACOL0110 | gi 57650036 ref NC_002951.2 :125530-126157   | q1 | q2 | OK     | 27.019  | 36.6094 | 0.43824   | -0.87037 | 0.3841    | 0.938206  |
| gene1060 | gene1060 | purC      | gi 57650036 ref NC_002951.2 :1084518-1085486 | q1 | q2 | OK     | 45.5234 | 91.6554 | 1.00961   | -1.85784 | 0.0631922 | 0.55727   |
| gene1061 | gene1061 | purS      | gi 57650036 ref NC_002951.2 :1084518-1085486 | q1 | q2 | OK     | 55.9539 | 102.813 | 0.877716  | -0.712   | 0.476468  | 0.960423  |
| gene1062 | gene1062 | purQ      | gi 57650036 ref NC_002951.2 :1085487-1090825 | q1 | q2 | OK     | 128.751 | 158.646 | 0.301233  | -0.09082 | 0.927636  | 0.996932  |
| gene1063 | gene1063 | purL      | gi 57650036 ref NC_002951.2 :1085487-1090825 | q1 | q2 | OK     | 140.314 | 94.6098 | -0.5686   | 0.32651  | 0.744042  | 0.986963  |
| gene1064 | gene1064 | purF      | gi 57650036 ref NC_002951.2 :1085487-1090825 | q1 | q2 | OK     | 186.682 | 70.6785 | -1.40124  | 0.6552   | 0.512339  | 0.971029  |
| gene1065 | gene1065 | purM      | gi 57650036 ref NC_002951.2 :1085487-1090825 | q1 | q2 | OK     | 315.81  | 84.6949 | -1.89871  | 0.84392  | 0.398715  | 0.939607  |
| gene1066 | gene1066 | purN      | gi 57650036 ref NC_002951.2 :1090827-1091394 | q1 | q2 | OK     | 301.067 | 54.7122 | -2.46015  | 4.25977  | 2.05E-05  | 0.0057093 |
| gene1067 | gene1067 | purH      | gi 57650036 ref NC_002951.2 :1091408-1092887 | q1 | q2 | OK     | 259.904 | 59.9876 | -2.11525  | 2.6839   | 0.007277  | 0.180916  |
| gene1068 | gene1068 | purD      | gi 57650036 ref NC_002951.2 :1092908-1094156 | q1 | q2 | OK     | 398.494 | 70.512  | -2.49862  | 3.0552   | 0.0022491 | 0.09572   |
| gene1069 | gene1069 | SACOL1084 | gi 57650036 ref NC_002951.2 :1094420-1096620 | q1 | q2 | OK     | 27.9116 | 30.0795 | 0.107912  | -0.06941 | 0.944661  | 0.996932  |
| gene107  | gene107  | SACOL0111 | gi 57650036 ref NC_002951.2 :126368-127145   | q1 | q2 | OK     | 1161.12 | 715.4   | -0.69869  | 0.66327  | 0.507157  | 0.969895  |
| gene1070 | gene1070 | SACOL1085 | gi 57650036 ref NC_002951.2 :1094420-1096620 | q1 | q2 | OK     | 88.4923 | 58.0748 | -0.607639 | 0.88004  | 0.378836  | 0.932987  |
| gene1071 | gene1071 | SACOL1086 | gi 57650036 ref NC_002951.2 :1096634-1097210 | q1 | q2 | OK     | 57.1191 | 30.2606 | -0.916534 | 1.83698  | 0.0662123 | 0.57234   |
| gene1072 | gene1072 | SACOL1087 | gi 57650036 ref NC_002951.2 :1097856-1097991 | q1 | q2 | OK     | 113.287 | 656.979 | 2.53586   | -2.43251 | 0.0149945 | 0.287414  |
| gene1073 | gene1073 | SACOL1088 | gi 57650036 ref NC_002951.2 :1098142-1099438 | q1 | q2 | OK     | 356.282 | 150.268 | -1.24548  | 1.39738  | 0.162299  | 0.806995  |
| gene1074 | gene1074 | SACOL1089 | gi 57650036 ref NC_002951.2 :1099862-1101035 | q1 | q2 | OK     | 80.7251 | 65.7027 | -0.297063 | 0.54638  | 0.584808  | 0.985265  |
| gene1075 | gene1075 | SACOL1090 | gi 57650036 ref NC_002951.2 :1101088-1101631 | q1 | q2 | OK     | 281.741 | 326.648 | 0.213369  | -0.33565 | 0.737132  | 0.986963  |
| gene1076 | gene1076 | ptsH      | gi 57650036 ref NC_002951.2 :1101784-1102051 | q1 | q2 | OK     | 864.643 | 707.695 | -0.288977 | 0.53123  | 0.595263  | 0.985953  |
| gene1077 | gene1077 | ptsI      | gi 57650036 ref NC_002951.2 :1102053-1103772 | q1 | q2 | OK     | 700.806 | 604.73  | -0.212724 | 0.19272  | 0.847179  | 0.996923  |
| gene1078 | gene1078 | SACOL1093 | gi 57650036 ref NC_002951.2 :1104008-1104242 | q1 | q2 | OK     | 43.8615 | 31.6077 | -0.472679 | 0.6487   | 0.516534  | 0.971416  |
| gene1079 | gene1079 | cydA      | gi 57650036 ref NC_002951.2 :1104439-1106817 | q1 | q2 | OK     | 46.4197 | 44.4078 | -0.063926 | 0.06586  | 0.947488  | 0.996932  |
| gene108  | gene108  | SACOL0112 | gi 57650036 ref NC_002951.2 :127288-127411   | q1 | q2 | NOTEST | 0       | 0       | 0         | 0        | 1         | 1         |
| gene1080 | gene1080 | cydB      | gi 57650036 ref NC_002951.2 :1104439-1106817 | q1 | q2 | OK     | 70.2432 | 83.2361 | 0.24485   | -0.27661 | 0.782078  | 0.986963  |
| gene1081 | gene1081 | SACOL1096 | gi 57650036 ref NC_002951.2 :1106949-1107612 | q1 | q2 | OK     | 174.875 | 131.883 | -0.407062 | 0.7419   | 0.458145  | 0.950591  |
| gene1082 | gene1082 | SACOL1097 | gi 57650036 ref NC_002951.2 :1107647-1107827 | q1 | q2 | OK     | 121.18  | 219.952 | 0.860034  | -1.2907  | 0.196808  | 0.819847  |
| gene1083 | gene1083 | SACOL1098 | gi 57650036 ref NC_002951.2 :1107960-1109876 | q1 | q2 | OK     | 257.982 | 234.509 | -0.137624 | 0.13217  | 0.894848  | 0.996932  |
| gene1084 | gene1084 | SACOL1099 | gi 57650036 ref NC_002951.2 :1107960-1109876 | q1 | q2 | OK     | 715.588 | 439.368 | -0.703701 | 0.1756   | 0.860612  | 0.996923  |



|          |          |           |                                              |    |    |    |         |         |           |          |           |          |
|----------|----------|-----------|----------------------------------------------|----|----|----|---------|---------|-----------|----------|-----------|----------|
| gene1085 | gene1085 | def       | gi 57650036 ref NC_002951.2 :1110356-1110908 | q1 | q2 | OK | 63.7206 | 54.0696 | -0.236942 | 0.48773  | 0.625741  | 0.986963 |
| gene1086 | gene1086 | SACOL1101 | gi 57650036 ref NC_002951.2 :1111272-1111899 | q1 | q2 | OK | 178.527 | 137.211 | -0.379751 | 0.70214  | 0.482593  | 0.962503 |
| gene1087 | gene1087 | pdhA      | gi 57650036 ref NC_002951.2 :1112069-1113182 | q1 | q2 | OK | 480.36  | 363.774 | -0.401074 | 0.40188  | 0.687776  | 0.986963 |
| gene1088 | gene1088 | pdhB      | gi 57650036 ref NC_002951.2 :1113185-1114163 | q1 | q2 | OK | 544.678 | 426.019 | -0.354487 | 0.35609  | 0.721777  | 0.986963 |
| gene1089 | gene1089 | pdhC      | gi 57650036 ref NC_002951.2 :1114253-1115546 | q1 | q2 | OK | 737.506 | 523.368 | -0.494831 | 0.45657  | 0.647978  | 0.986963 |
| gene109  | gene109  | SACOL0113 | gi 57650036 ref NC_002951.2 :127489-129116   | q1 | q2 | OK | 31.534  | 38.7035 | 0.295556  | -0.47778 | 0.632805  | 0.986963 |
| gene1090 | gene1090 | pdhD      | gi 57650036 ref NC_002951.2 :1115549-1116956 | q1 | q2 | OK | 585.999 | 399.995 | -0.550918 | 0.51648  | 0.605518  | 0.986963 |
| gene1091 | gene1091 | SACOL1106 | gi 57650036 ref NC_002951.2 :1117123-1117399 | q1 | q2 | OK | 124.332 | 108.378 | -0.198127 | 0.38457  | 0.700556  | 0.986963 |
| gene1092 | gene1092 | SACOL1107 | gi 57650036 ref NC_002951.2 :1117542-1118082 | q1 | q2 | OK | 115.666 | 44.4122 | -1.38094  | 2.79288  | 0.005224  | 0.144433 |
| gene1093 | gene1093 | SACOL1108 | gi 57650036 ref NC_002951.2 :1118094-1119979 | q1 | q2 | OK | 132.102 | 63.4922 | -1.057    | 1.35995  | 0.173846  | 0.819812 |
| gene1094 | gene1094 | SACOL1109 | gi 57650036 ref NC_002951.2 :1118094-1119979 | q1 | q2 | OK | 69.1233 | 36.1075 | -0.936876 | 0.7282   | 0.466494  | 0.954346 |
| gene1095 | gene1095 | SACOL1110 | gi 57650036 ref NC_002951.2 :1119984-1121867 | q1 | q2 | OK | 44.197  | 24.6653 | -0.841467 | 0.51679  | 0.605301  | 0.986963 |
| gene1096 | gene1096 | SACOL1111 | gi 57650036 ref NC_002951.2 :1119984-1121867 | q1 | q2 | OK | 138.617 | 94.9597 | -0.545718 | 0.73759  | 0.460761  | 0.950591 |
| gene1097 | gene1097 | SACOL1112 | gi 57650036 ref NC_002951.2 :1121940-1122960 | q1 | q2 | OK | 476.485 | 509.525 | 0.0967206 | -0.09552 | 0.923903  | 0.996932 |
| gene1098 | gene1098 | SACOL1113 | gi 57650036 ref NC_002951.2 :1123242-1123662 | q1 | q2 | OK | 239.241 | 188.339 | -0.345134 | 0.68257  | 0.494879  | 0.964002 |
| gene1099 | gene1099 | SACOL1114 | gi 57650036 ref NC_002951.2 :1123743-1125096 | q1 | q2 | OK | 508.25  | 574.734 | 0.177358  | -0.16455 | 0.869298  | 0.996923 |
| gene11   | gene11   | SACOL0012 | gi 57650036 ref NC_002951.2 :16111-17101     | q1 | q2 | OK | 92.2457 | 87.8033 | -0.071205 | 0.13108  | 0.895716  | 0.996932 |
| gene110  | gene110  | SACOL0114 | gi 57650036 ref NC_002951.2 :127489-129116   | q1 | q2 | OK | 26.0419 | 36.0212 | 0.468013  | -0.57109 | 0.56794   | 0.985265 |
| gene1100 | gene1100 | SACOL1115 | gi 57650036 ref NC_002951.2 :1125279-1125894 | q1 | q2 | OK | 129.915 | 243.495 | 0.906324  | -1.59208 | 0.111366  | 0.717934 |
| gene1101 | gene1101 | SACOL1116 | gi 57650036 ref NC_002951.2 :1126050-1126878 | q1 | q2 | OK | 504.291 | 301.458 | -0.742299 | 0.83615  | 0.40307   | 0.939607 |
| gene1102 | gene1102 | SACOL1117 | gi 57650036 ref NC_002951.2 :1127031-1127223 | q1 | q2 | OK | 90.0609 | 48.8712 | -0.881918 | 1.08831  | 0.276458  | 0.879877 |
| gene1103 | gene1103 | typA      | gi 57650036 ref NC_002951.2 :1127324-1129172 | q1 | q2 | OK | 112.99  | 74.5702 | -0.599522 | 0.81461  | 0.415294  | 0.939652 |
| gene1104 | gene1104 | SACOL1119 | gi 57650036 ref NC_002951.2 :1129311-1129479 | q1 | q2 | OK | 620.455 | 518.025 | -0.260304 | 0.46941  | 0.638774  | 0.986963 |
| gene1105 | gene1105 | SACOL1120 | gi 57650036 ref NC_002951.2 :1129480-1129963 | q1 | q2 | OK | 99.4699 | 86.7473 | -0.197441 | 0.40904  | 0.682508  | 0.986963 |
| gene1106 | gene1106 | SACOL1121 | gi 57650036 ref NC_002951.2 :1130103-1130379 | q1 | q2 | OK | 1057.36 | 474.329 | -1.15651  | 2.02472  | 0.042896  | 0.472836 |
| gene1107 | gene1107 | SACOL1122 | gi 57650036 ref NC_002951.2 :1130692-1131919 | q1 | q2 | OK | 70.2658 | 95.1044 | 0.43669   | -0.75824 | 0.448308  | 0.948742 |
| gene1108 | gene1108 | pyc       | gi 57650036 ref NC_002951.2 :1132472-1135925 | q1 | q2 | OK | 97.1882 | 184.729 | 0.926559  | -0.91419 | 0.360619  | 0.923053 |
| gene1109 | gene1109 | ctaA      | gi 57650036 ref NC_002951.2 :1136064-1137135 | q1 | q2 | OK | 87.8052 | 63.7188 | -0.462588 | 0.86604  | 0.386469  | 0.938503 |
| gene111  | gene111  | SACOL0115 | gi 57650036 ref NC_002951.2 :129325-133131   | q1 | q2 | OK | 23.4016 | 27.2743 | 0.220935  | -0.2031  | 0.839054  | 0.996923 |
| gene1110 | gene1110 | ctaB      | gi 57650036 ref NC_002951.2 :1137415-1138327 | q1 | q2 | OK | 218.494 | 85.951  | -1.34601  | 2.08214  | 0.0373297 | 0.444619 |
| gene1111 | gene1111 | SACOL1126 | gi 57650036 ref NC_002951.2 :1138351-1138813 | q1 | q2 | OK | 274.804 | 99.8969 | -1.45989  | 2.79664  | 0.0051637 | 0.144433 |
| gene1112 | gene1112 | SACOL1127 | gi 57650036 ref NC_002951.2 :1139024-1139228 | q1 | q2 | OK | 41.5265 | 53.2467 | 0.358661  | -0.45069 | 0.652213  | 0.986963 |
| gene1113 | gene1113 | SACOL1128 | gi 57650036 ref NC_002951.2 :1139277-1140177 | q1 | q2 | OK | 114.837 | 96.2384 | -0.254908 | 0.46266  | 0.64361   | 0.986963 |

|          |          |           |                                              |    |    |        |         |         |           |          |           |           |
|----------|----------|-----------|----------------------------------------------|----|----|--------|---------|---------|-----------|----------|-----------|-----------|
| gene1114 | gene1114 | SACOL1129 | gi 57650036 ref NC_002951.2 :1140192-1140627 | q1 | q2 | OK     | 116.131 | 103.248 | -0.16964  | 0.35148  | 0.725226  | 0.986963  |
| gene1115 | gene1115 | SACOL1130 | gi 57650036 ref NC_002951.2 :1140689-1141616 | q1 | q2 | OK     | 79.932  | 78.7109 | -0.022209 | 0.043    | 0.965703  | 0.996932  |
| gene1116 | gene1116 | SACOL1131 | gi 57650036 ref NC_002951.2 :1141854-1142109 | q1 | q2 | OK     | 38.9002 | 34.0775 | -0.19096  | 0.28333  | 0.776922  | 0.986963  |
| gene1117 | gene1117 | SACOL1132 | gi 57650036 ref NC_002951.2 :1142111-1142501 | q1 | q2 | OK     | 140.851 | 167.1   | 0.246545  | -0.50994 | 0.610093  | 0.986963  |
| gene1118 | gene1118 | SACOL1133 | gi 57650036 ref NC_002951.2 :1142570-1143113 | q1 | q2 | OK     | 137.932 | 60.9254 | -1.17885  | 2.38413  | 0.0171193 | 0.307047  |
| gene1119 | gene1119 | coaD      | gi 57650036 ref NC_002951.2 :1143114-1143597 | q1 | q2 | OK     | 141.468 | 59.8865 | -1.24018  | 2.51752  | 0.0118186 | 0.249708  |
| gene112  | gene112  | SACOL0116 | gi 57650036 ref NC_002951.2 :129325-133131   | q1 | q2 | OK     | 21.3943 | 31.4248 | 0.554675  | -0.53836 | 0.590332  | 0.985265  |
| gene1120 | gene1120 | SACOL1135 | gi 57650036 ref NC_002951.2 :1143658-1144798 | q1 | q2 | OK     | 40.9607 | 48.9035 | 0.255698  | -0.51926 | 0.603583  | 0.986963  |
| gene1121 | gene1121 | SACOL1136 | gi 57650036 ref NC_002951.2 :1144924-1145482 | q1 | q2 | OK     | 274.141 | 103.592 | -1.40401  | 2.50935  | 0.0120953 | 0.249708  |
| gene1122 | gene1122 | rpmF      | gi 57650036 ref NC_002951.2 :1145561-1145735 | q1 | q2 | OK     | 996.486 | 375.033 | -1.40983  | 2.58534  | 0.0097283 | 0.226936  |
| gene1123 | gene1123 | isdB      | gi 57650036 ref NC_002951.2 :1145888-1147826 | q1 | q2 | OK     | 32.61   | 45.5824 | 0.483161  | -0.9014  | 0.367374  | 0.928011  |
| gene1124 | gene1124 | isdA      | gi 57650036 ref NC_002951.2 :1148028-1149081 | q1 | q2 | OK     | 42.1155 | 48.6255 | 0.20736   | -0.42444 | 0.671246  | 0.986963  |
| gene1125 | gene1125 | isdC      | gi 57650036 ref NC_002951.2 :1149289-1151924 | q1 | q2 | OK     | 38.623  | 24.2694 | -0.670325 | 0.55851  | 0.5765    | 0.985265  |
| gene1126 | gene1126 | isdD      | gi 57650036 ref NC_002951.2 :1149289-1151924 | q1 | q2 | OK     | 36.6726 | 38.3001 | 0.0626443 | -0.07754 | 0.938191  | 0.996932  |
| gene1127 | gene1127 | SACOL1143 | gi 57650036 ref NC_002951.2 :1149289-1151924 | q1 | q2 | OK     | 32.8974 | 36.2756 | 0.141028  | -0.1479  | 0.882422  | 0.996932  |
| gene1128 | gene1128 | SACOL1144 | gi 57650036 ref NC_002951.2 :1151936-1152902 | q1 | q2 | OK     | 32.4969 | 37.987  | 0.225205  | -0.46669 | 0.640719  | 0.986963  |
| gene1129 | gene1129 | srtB      | gi 57650036 ref NC_002951.2 :1152963-1153698 | q1 | q2 | OK     | 15.3233 | 27.5356 | 0.845573  | -1.63218 | 0.102641  | 0.686167  |
| gene113  | gene113  | SACOL0117 | gi 57650036 ref NC_002951.2 :129325-133131   | q1 | q2 | OK     | 23.9102 | 32.2065 | 0.429724  | -0.46813 | 0.639691  | 0.986963  |
| gene1130 | gene1130 | SACOL1146 | gi 57650036 ref NC_002951.2 :1153716-1154040 | q1 | q2 | OK     | 41.0729 | 60.7567 | 0.564856  | -1.02493 | 0.305394  | 0.892668  |
| gene1131 | gene1131 | SACOL1147 | gi 57650036 ref NC_002951.2 :1154423-1155164 | q1 | q2 | OK     | 135.451 | 60.6379 | -1.15948  | 2.2337   | 0.0255031 | 0.368182  |
| gene1132 | gene1132 | pheS      | gi 57650036 ref NC_002951.2 :1155544-1159005 | q1 | q2 | OK     | 45.8588 | 50.8581 | 0.149279  | -0.09829 | 0.9217    | 0.996932  |
| gene1133 | gene1133 | pheT      | gi 57650036 ref NC_002951.2 :1155544-1159005 | q1 | q2 | OK     | 61.5786 | 51.1058 | -0.26894  | 0.3049   | 0.760444  | 0.986963  |
| gene1134 | gene1134 | rnhC      | gi 57650036 ref NC_002951.2 :1159175-1160114 | q1 | q2 | OK     | 43.8479 | 42.4905 | -0.045366 | 0.09385  | 0.925229  | 0.996932  |
| gene1135 | gene1135 | SACOL1151 | gi 57650036 ref NC_002951.2 :1160483-1160750 | q1 | q2 | OK     | 473.018 | 110.189 | -2.10191  | 4.09642  | 4.20E-05  | 0.0084086 |
| gene1136 | gene1136 | SACOL1152 | gi 57650036 ref NC_002951.2 :1160750-1161272 | q1 | q2 | OK     | 112.065 | 53.0038 | -1.08017  | 2.20451  | 0.0274885 | 0.380118  |
| gene1137 | gene1137 | SACOL1153 | gi 57650036 ref NC_002951.2 :1161344-1163057 | q1 | q2 | OK     | 125.791 | 82.4448 | -0.609527 | 0.82141  | 0.411415  | 0.939607  |
| gene1138 | gene1138 | SACOL1154 | gi 57650036 ref NC_002951.2 :1163066-1165415 | q1 | q2 | OK     | 173.881 | 86.9333 | -1.00012  | 1.11071  | 0.266695  | 0.875983  |
| gene1139 | gene1139 | trxA      | gi 57650036 ref NC_002951.2 :1165587-1165902 | q1 | q2 | OK     | 276.696 | 343.3   | 0.311171  | -0.63266 | 0.526958  | 0.97289   |
| gene114  | gene114  | sodA1     | gi 57650036 ref NC_002951.2 :133398-133998   | q1 | q2 | OK     | 181.667 | 83.6598 | -1.11869  | 2.14993  | 0.0315608 | 0.419308  |
| gene1140 | gene1140 | SACOL1156 | gi 57650036 ref NC_002951.2 :1165964-1166060 | q1 | q2 | NOTEST | 0       | 0       | 0         | 0        | 1         | 1         |
| gene1141 | gene1141 | uvrC      | gi 57650036 ref NC_002951.2 :1166225-1168007 | q1 | q2 | OK     | 84.143  | 77.9783 | -0.10977  | 0.16119  | 0.871946  | 0.996923  |
| gene1142 | gene1142 | sdhC      | gi 57650036 ref NC_002951.2 :1168330-1168945 | q1 | q2 | OK     | 511.363 | 143.772 | -1.83056  | 2.58419  | 0.0097607 | 0.226936  |
| gene1143 | gene1143 | sdhA      | gi 57650036 ref NC_002951.2 :1168996-1171578 | q1 | q2 | OK     | 1745.25 | 448.342 | -1.96076  | 1.5331   | 0.12525   | 0.732386  |

|          |          |             |                                              |    |    |        |         |         |            |           |           |           |
|----------|----------|-------------|----------------------------------------------|----|----|--------|---------|---------|------------|-----------|-----------|-----------|
| gene1144 | gene1144 | sdhB        | gi 57650036 ref NC_002951.2 :1168996-1171578 | q1 | q2 | OK     | 2097.48 | 607.866 | -1.78683   | 1.0044    | 0.315183  | 0.892668  |
| gene1145 | gene1145 | murI        | gi 57650036 ref NC_002951.2 :1171813-1172614 | q1 | q2 | OK     | 210.593 | 149.504 | -0.494277  | 0.77269   | 0.439709  | 0.944827  |
| gene1146 | gene1146 | SACOL1162   | gi 57650036 ref NC_002951.2 :1172625-1173709 | q1 | q2 | OK     | 227.45  | 215.015 | -0.081111  | 0.06634   | 0.947105  | 0.996932  |
| gene1147 | gene1147 | SACOL1163   | gi 57650036 ref NC_002951.2 :1172625-1173709 | q1 | q2 | OK     | 353.238 | 327.194 | -0.110494  | 0.10001   | 0.920339  | 0.996932  |
| gene1148 | gene1148 | SACOL1164   | gi 57650036 ref NC_002951.2 :1174197-1174527 | q1 | q2 | OK     | 180.454 | 341.684 | 0.921033   | -1.87205  | 0.061199  | 0.550791  |
| gene1149 | gene1149 | SACOL1165   | gi 57650036 ref NC_002951.2 :1174697-1174805 | q1 | q2 | NOTEST | 0       | 0       | 0          | 0         | 1         | 1         |
| gene115  | gene115  | SACOL0119   | gi 57650036 ref NC_002951.2 :134365-135091   | q1 | q2 | OK     | 682.839 | 37.9713 | -4.16856   | 5.32641   | 1.00E-07  | 0.0001258 |
| gene1150 | gene1150 | SACOL1166   | gi 57650036 ref NC_002951.2 :1174895-1175297 | q1 | q2 | OK     | 25.824  | 27.7343 | 0.102961   | -0.18052  | 0.856741  | 0.996923  |
| gene1151 | gene1151 | SACOL1167   | gi 57650036 ref NC_002951.2 :1175968-1176475 | q1 | q2 | OK     | 72.2103 | 31.3974 | -1.20156   | 2.38417   | 0.0171178 | 0.307047  |
| gene1152 | gene1152 | efb         | gi 57650036 ref NC_002951.2 :1176733-1177231 | q1 | q2 | OK     | 75.2419 | 149.724 | 0.992699   | -2.02513  | 0.0428536 | 0.472836  |
| gene1153 | gene1153 | SACOL1169   | gi 57650036 ref NC_002951.2 :1177384-1177735 | q1 | q2 | OK     | 68.6801 | 129.571 | 0.915774   | -1.83856  | 0.0659802 | 0.57234   |
| gene1154 | gene1154 | SACOL1170   | gi 57650036 ref NC_002951.2 :1178160-1178406 | q1 | q2 | OK     | 86.6242 | 46.5782 | -0.895116  | 1.45768   | 0.144928  | 0.780931  |
| gene1155 | gene1155 | SACOL1171   | gi 57650036 ref NC_002951.2 :1178556-1178742 | q1 | q2 | OK     | 45.1842 | 14.3148 | -1.65831   | 1.27412   | 0.202621  | 0.819847  |
| gene1156 | gene1156 | SACOL1172   | gi 57650036 ref NC_002951.2 :1179363-1179597 | q1 | q2 | OK     | 110.531 | 48.6272 | -1.18461   | 1.8986    | 0.0576173 | 0.540443  |
| gene1157 | gene1157 | hly         | gi 57650036 ref NC_002951.2 :1180073-1181033 | q1 | q2 | OK     | 26.0193 | 26.3708 | 0.0193574  | -0.03972  | 0.968312  | 0.996932  |
| gene1158 | gene1158 | SACOL1174   | gi 57650036 ref NC_002951.2 :1181705-1182033 | q1 | q2 | OK     | 64.1394 | 27.7808 | -1.20712   | 0.54096   | 0.588537  | 0.985265  |
| gene1159 | gene1159 | SACOL1175   | gi 57650036 ref NC_002951.2 :1181705-1182033 | q1 | q2 | OK     | 47.4992 | 15.5474 | -1.61123   | 1.37989   | 0.167622  | 0.814226  |
| gene116  | gene116  | SACOL0120   | gi 57650036 ref NC_002951.2 :135282-136038   | q1 | q2 | OK     | 82.5421 | 49.3633 | -0.741691  | 1.51194   | 0.130548  | 0.739969  |
| gene1160 | gene1160 | SACOL1176   | gi 57650036 ref NC_002951.2 :1182064-1182421 | q1 | q2 | OK     | 74.8439 | 62.1485 | -0.268164  | 0.40846   | 0.682937  | 0.986963  |
| gene1161 | gene1161 | SACOL1177   | gi 57650036 ref NC_002951.2 :1182064-1182421 | q1 | q2 | OK     | 569.693 | 845.342 | 0.569351   | -0.5332   | 0.593897  | 0.985953  |
| gene1162 | gene1162 | SACOL1178   | gi 57650036 ref NC_002951.2 :1182589-1183306 | q1 | q2 | OK     | 37.7733 | 58.4113 | 0.628881   | -1.29695  | 0.194648  | 0.819847  |
| gene1163 | gene1163 | SACOL1179   | gi 57650036 ref NC_002951.2 :1183413-1184139 | q1 | q2 | OK     | 22.2146 | 27.5049 | 0.308181   | -0.60961  | 0.54212   | 0.979019  |
| gene1164 | gene1164 | SACOL1180   | gi 57650036 ref NC_002951.2 :1184233-1184959 | q1 | q2 | OK     | 29.6886 | 38.7015 | 0.38248    | -0.77895  | 0.436011  | 0.943001  |
| gene1165 | gene1165 | arcB1       | gi 57650036 ref NC_002951.2 :1185396-1186398 | q1 | q2 | OK     | 26.6503 | 34.0582 | 0.353848   | -0.73142  | 0.464521  | 0.952374  |
| gene1166 | gene1166 | arcC1       | gi 57650036 ref NC_002951.2 :1186420-1187353 | q1 | q2 | OK     | 42.5276 | 54.6395 | 0.361545   | -0.74333  | 0.45728   | 0.950521  |
| gene1167 | gene1167 | SACOL1183   | gi 57650036 ref NC_002951.2 :1187524-1189081 | q1 | q2 | OK     | 58.971  | 73.1345 | 0.310546   | -0.53038  | 0.59585   | 0.986276  |
| gene1168 | gene1168 | SACOL1184   | gi 57650036 ref NC_002951.2 :1189920-1190868 | q1 | q2 | OK     | 40.2241 | 56.3334 | 0.485929   | -0.99711  | 0.31871   | 0.892668  |
| gene1169 | gene1169 | SACOL1185   | gi 57650036 ref NC_002951.2 :1191116-1191305 | q1 | q2 | OK     | 12.6065 | 19.8283 | 0.653398   | -0.47426  | 0.635318  | 0.986963  |
| gene117  | gene117  | deoD1       | gi 57650036 ref NC_002951.2 :136273-136981   | q1 | q2 | OK     | 39.6916 | 31.4682 | -0.334938  | 0.68244   | 0.494961  | 0.964002  |
| gene1170 | gene1170 | SACOL_tRNA- | gi 57650036 ref NC_002951.2 :1191779-1191853 | q1 | q2 | NOTEST | 0       | 0       | 0          | 0         | 1         | 1         |
| gene1171 | gene1171 | SACOL1186   | gi 57650036 ref NC_002951.2 :1192216-1192351 | q1 | q2 | OK     | 141.609 | 0       | -1.79769e+ | -1.79769e | 0.0370172 | 0.444619  |
| gene1172 | gene1172 | SACOL1187   | gi 57650036 ref NC_002951.2 :1192407-1192542 | q1 | q2 | OK     | 198.253 | 50.5369 | -1.97193   | 1.12305   | 0.261418  | 0.875983  |
| gene1173 | gene1173 | SACOL1188   | gi 57650036 ref NC_002951.2 :1192665-1193361 | q1 | q2 | OK     | 91.5052 | 116.449 | 0.347774   | -0.68501  | 0.493337  | 0.964002  |

|          |          |           |                                              |    |    |    |         |         |           |          |           |           |
|----------|----------|-----------|----------------------------------------------|----|----|----|---------|---------|-----------|----------|-----------|-----------|
| gene1174 | gene1174 | SACOL1189 | gi 57650036 ref NC_002951.2 :1193469-1193910 | q1 | q2 | OK | 605.266 | 787.861 | 0.380372  | -0.48237 | 0.629543  | 0.986963  |
| gene1175 | gene1175 | SACOL1190 | gi 57650036 ref NC_002951.2 :1194104-1195718 | q1 | q2 | OK | 200.576 | 161.696 | -0.310867 | 0.34796  | 0.727872  | 0.986963  |
| gene1176 | gene1176 | mraZ      | gi 57650036 ref NC_002951.2 :1195861-1196293 | q1 | q2 | OK | 659.431 | 150.635 | -2.13016  | 3.30418  | 0.0009525 | 0.0512318 |
| gene1177 | gene1177 | mraW      | gi 57650036 ref NC_002951.2 :1196308-1197244 | q1 | q2 | OK | 438.687 | 154.137 | -1.50898  | 1.83696  | 0.0662161 | 0.57234   |
| gene1178 | gene1178 | SACOL1193 | gi 57650036 ref NC_002951.2 :1197272-1199874 | q1 | q2 | OK | 689.536 | 223.263 | -1.62688  | 1.20571  | 0.227929  | 0.858851  |
| gene1179 | gene1179 | pbp1      | gi 57650036 ref NC_002951.2 :1197272-1199874 | q1 | q2 | OK | 91.9901 | 46.0099 | -0.999533 | 0.91044  | 0.362593  | 0.925274  |
| gene118  | gene118  | SACOL0122 | gi 57650036 ref NC_002951.2 :136987-138340   | q1 | q2 | OK | 42.4762 | 35.257  | -0.268745 | 0.54223  | 0.587661  | 0.985265  |
| gene1180 | gene1180 | mraY      | gi 57650036 ref NC_002951.2 :1200165-1201131 | q1 | q2 | OK | 36.1237 | 39.5065 | 0.129142  | -0.26767 | 0.78895   | 0.986986  |
| gene1181 | gene1181 | murD      | gi 57650036 ref NC_002951.2 :1201132-1202482 | q1 | q2 | OK | 86.1472 | 54.9474 | -0.648752 | 1.139    | 0.254702  | 0.875983  |
| gene1182 | gene1182 | divIB     | gi 57650036 ref NC_002951.2 :1202497-1203817 | q1 | q2 | OK | 141.027 | 88.258  | -0.676172 | 0.99029  | 0.322034  | 0.89482   |
| gene1183 | gene1183 | ftsA      | gi 57650036 ref NC_002951.2 :1203922-1205335 | q1 | q2 | OK | 451.204 | 336.021 | -0.425227 | 0.40995  | 0.681841  | 0.986963  |
| gene1184 | gene1184 | ftsZ      | gi 57650036 ref NC_002951.2 :1205367-1206540 | q1 | q2 | OK | 642.576 | 484.892 | -0.406205 | 0.38346  | 0.701377  | 0.986963  |
| gene1185 | gene1185 | SACOL1200 | gi 57650036 ref NC_002951.2 :1206799-1207591 | q1 | q2 | OK | 74.0583 | 67.5    | -0.133776 | 0.27154  | 0.785975  | 0.986986  |
| gene1186 | gene1186 | SACOL1201 | gi 57650036 ref NC_002951.2 :1207608-1208843 | q1 | q2 | OK | 294.599 | 343.027 | 0.219571  | -0.16219 | 0.871154  | 0.996923  |
| gene1187 | gene1187 | ylmF      | gi 57650036 ref NC_002951.2 :1207608-1208843 | q1 | q2 | OK | 447.712 | 379.409 | -0.238815 | 0.17727  | 0.859294  | 0.996923  |
| gene1188 | gene1188 | ylmG      | gi 57650036 ref NC_002951.2 :1208854-1209145 | q1 | q2 | OK | 290.291 | 237.24  | -0.291155 | 0.60186  | 0.547266  | 0.979019  |
| gene1189 | gene1189 | ylmH      | gi 57650036 ref NC_002951.2 :1209254-1210034 | q1 | q2 | OK | 201.558 | 166.716 | -0.273809 | 0.43082  | 0.666602  | 0.986963  |
| gene119  | gene119  | deoC1     | gi 57650036 ref NC_002951.2 :138420-139083   | q1 | q2 | OK | 212.565 | 79.2951 | -1.4226   | 2.55431  | 0.0106398 | 0.23854   |
| gene1190 | gene1190 | SACOL1205 | gi 57650036 ref NC_002951.2 :1210057-1210675 | q1 | q2 | OK | 514.384 | 301.36  | -0.771356 | 0.99356  | 0.320438  | 0.894022  |
| gene1191 | gene1191 | ileS      | gi 57650036 ref NC_002951.2 :1210895-1213649 | q1 | q2 | OK | 77.8122 | 62.7485 | -0.310417 | 0.39609  | 0.692041  | 0.986963  |
| gene1192 | gene1192 | SACOL1207 | gi 57650036 ref NC_002951.2 :1213938-1214736 | q1 | q2 | OK | 109.384 | 80.1672 | -0.448319 | 0.86682  | 0.386039  | 0.938503  |
| gene1193 | gene1193 | lspA      | gi 57650036 ref NC_002951.2 :1215559-1216968 | q1 | q2 | OK | 88.101  | 50.8761 | -0.79217  | 0.73402  | 0.462939  | 0.952374  |
| gene1194 | gene1194 | SACOL1209 | gi 57650036 ref NC_002951.2 :1215559-1216968 | q1 | q2 | OK | 101.27  | 55.0346 | -0.8798   | 1.32153  | 0.186326  | 0.819812  |
| gene1195 | gene1195 | pyrR      | gi 57650036 ref NC_002951.2 :1217367-1217895 | q1 | q2 | OK | 38.0192 | 68.5502 | 0.850435  | -1.71934 | 0.0855526 | 0.638501  |
| gene1196 | gene1196 | uraA      | gi 57650036 ref NC_002951.2 :1218112-1219420 | q1 | q2 | OK | 43.2412 | 65.8123 | 0.605951  | -1.15912 | 0.246408  | 0.869586  |
| gene1197 | gene1197 | pyrB      | gi 57650036 ref NC_002951.2 :1219447-1220329 | q1 | q2 | OK | 40.8675 | 58.435  | 0.515877  | -1.06173 | 0.28836   | 0.887342  |
| gene1198 | gene1198 | pyrC      | gi 57650036 ref NC_002951.2 :1220346-1221621 | q1 | q2 | OK | 64.0796 | 71.1905 | 0.15182   | -0.27832 | 0.780771  | 0.986963  |
| gene1199 | gene1199 | carA      | gi 57650036 ref NC_002951.2 :1221622-1225889 | q1 | q2 | OK | 37.2167 | 34.8509 | -0.094752 | 0.04923  | 0.960739  | 0.996932  |
| gene12   | gene12   | SACOL0013 | gi 57650036 ref NC_002951.2 :17406-18330     | q1 | q2 | OK | 105.825 | 74.748  | -0.501581 | 0.93926  | 0.347598  | 0.912037  |
| gene120  | gene120  | deoB      | gi 57650036 ref NC_002951.2 :139110-140289   | q1 | q2 | OK | 225.969 | 110.305 | -1.03462  | 1.3756   | 0.168946  | 0.814226  |
| gene1200 | gene1200 | carB      | gi 57650036 ref NC_002951.2 :1221622-1225889 | q1 | q2 | OK | 59.7036 | 45.9359 | -0.378196 | 0.42895  | 0.66796   | 0.986963  |
| gene1201 | gene1201 | pyrF      | gi 57650036 ref NC_002951.2 :1225998-1227302 | q1 | q2 | OK | 67.3116 | 45.6096 | -0.561519 | 0.88515  | 0.376079  | 0.932533  |
| gene1202 | gene1202 | pyrE      | gi 57650036 ref NC_002951.2 :1225998-1227302 | q1 | q2 | OK | 47.2534 | 34.8081 | -0.440998 | 0.54558  | 0.585358  | 0.985265  |

|          |          |           |                                              |    |    |    |         |         |             |           |           |          |
|----------|----------|-----------|----------------------------------------------|----|----|----|---------|---------|-------------|-----------|-----------|----------|
| gene1203 | gene1203 | SACOL1218 | gi 57650036 ref NC_002951.2 :1227331-1227544 | q1 | q2 | OK | 346.685 | 219.866 | -0.656996   | 1.26392   | 0.206258  | 0.823389 |
| gene1204 | gene1204 | SACOL1219 | gi 57650036 ref NC_002951.2 :1227980-1228382 | q1 | q2 | OK | 142.032 | 130.231 | -0.125145   | 0.25918   | 0.795497  | 0.987561 |
| gene1205 | gene1205 | SACOL1220 | gi 57650036 ref NC_002951.2 :1228644-1230342 | q1 | q2 | OK | 140.408 | 96.5268 | -0.540625   | 0.69343   | 0.488039  | 0.964002 |
| gene1206 | gene1206 | gmk       | gi 57650036 ref NC_002951.2 :1230616-1231458 | q1 | q2 | OK | 451.677 | 180.096 | -1.32653    | 1.51509   | 0.12975   | 0.739318 |
| gene1207 | gene1207 | rpoZ      | gi 57650036 ref NC_002951.2 :1230616-1231458 | q1 | q2 | OK | 1337.84 | 375.691 | -1.83228    | 1.11192   | 0.266174  | 0.875983 |
| gene1208 | gene1208 | coaBC     | gi 57650036 ref NC_002951.2 :1231667-1235281 | q1 | q2 | OK | 100.677 | 80.3847 | -0.32474    | 0.18612   | 0.852351  | 0.996923 |
| gene1209 | gene1209 | priA      | gi 57650036 ref NC_002951.2 :1231667-1235281 | q1 | q2 | OK | 94.7008 | 102.293 | 0.111254    | -0.0984   | 0.921618  | 0.996932 |
| gene121  | gene121  | SACOL0125 | gi 57650036 ref NC_002951.2 :140419-142032   | q1 | q2 | OK | 35.2083 | 45.3133 | 0.36402     | -0.51772  | 0.604651  | 0.986963 |
| gene1210 | gene1210 | SACOL1225 | gi 57650036 ref NC_002951.2 :1235786-1236740 | q1 | q2 | OK | 43.0098 | 68.4116 | 0.669577    | -1.35389  | 0.175771  | 0.819812 |
| gene1211 | gene1211 | SACOL1226 | gi 57650036 ref NC_002951.2 :1236902-1237181 | q1 | q2 | OK | 1505.14 | 1849.4  | 0.297157    | -0.38633  | 0.699253  | 0.986963 |
| gene1212 | gene1212 | def2      | gi 57650036 ref NC_002951.2 :1237404-1240125 | q1 | q2 | OK | 154.719 | 83.7531 | -0.88544    | 0.38062   | 0.703483  | 0.986963 |
| gene1213 | gene1213 | fnt       | gi 57650036 ref NC_002951.2 :1237404-1240125 | q1 | q2 | OK | 175.776 | 79.7017 | -1.14106    | 0.78855   | 0.430373  | 0.940181 |
| gene1214 | gene1214 | sun       | gi 57650036 ref NC_002951.2 :1237404-1240125 | q1 | q2 | OK | 161.901 | 68.1627 | -1.24805    | 0.99602   | 0.319242  | 0.892668 |
| gene1215 | gene1215 | SACOL1230 | gi 57650036 ref NC_002951.2 :1240127-1241222 | q1 | q2 | OK | 180.048 | 63.3472 | -1.50703    | 2.32603   | 0.0200168 | 0.32851  |
| gene1216 | gene1216 | SACOL1231 | gi 57650036 ref NC_002951.2 :1241228-1243963 | q1 | q2 | OK | 125.091 | 74.4499 | -0.748637   | 0.46547   | 0.641597  | 0.986963 |
| gene1217 | gene1217 | SACOL1232 | gi 57650036 ref NC_002951.2 :1241228-1243963 | q1 | q2 | OK | 113.896 | 60.2028 | -0.919808   | 0.95381   | 0.340183  | 0.905587 |
| gene1218 | gene1218 | SACOL1234 | gi 57650036 ref NC_002951.2 :1244190-1245066 | q1 | q2 | OK | 139.508 | 82.021  | -0.766281   | 1.36992   | 0.170711  | 0.819609 |
| gene1219 | gene1219 | rpe       | gi 57650036 ref NC_002951.2 :1245066-1245711 | q1 | q2 | OK | 99.6136 | 55.2076 | -0.851477   | 1.73727   | 0.0823395 | 0.630349 |
| gene122  | gene122  | SACOL0126 | gi 57650036 ref NC_002951.2 :140419-142032   | q1 | q2 | OK | 32.3849 | 46.8403 | 0.532428    | -0.73982  | 0.459409  | 0.950591 |
| gene1220 | gene1220 | SACOL1236 | gi 57650036 ref NC_002951.2 :1245717-1246359 | q1 | q2 | OK | 155.259 | 104.514 | -0.570976   | 1.09547   | 0.273311  | 0.879648 |
| gene1221 | gene1221 | rpmB      | gi 57650036 ref NC_002951.2 :1246739-1246928 | q1 | q2 | OK | 3441.56 | 1903.52 | -0.854397   | 1.57434   | 0.115408  | 0.723345 |
| gene1222 | gene1222 | SACOL1239 | gi 57650036 ref NC_002951.2 :1247370-1247745 | q1 | q2 | OK | 284.819 | 164.993 | -0.787644   | 1.57819   | 0.114522  | 0.722525 |
| gene1223 | gene1223 | SACOL1240 | gi 57650036 ref NC_002951.2 :1247759-1249406 | q1 | q2 | OK | 167.468 | 85.7994 | -0.964847   | 1.23342   | 0.217421  | 0.839912 |
| gene1224 | gene1224 | recG      | gi 57650036 ref NC_002951.2 :1249595-1251656 | q1 | q2 | OK | 79.2489 | 85.1245 | 0.103184    | -0.14029  | 0.888434  | 0.996932 |
| gene1225 | gene1225 | SACOL1242 | gi 57650036 ref NC_002951.2 :1251858-1252431 | q1 | q2 | OK | 151.445 | 142.301 | -0.089849   | 0.17465   | 0.861358  | 0.996923 |
| gene1226 | gene1226 | plsX      | gi 57650036 ref NC_002951.2 :1252435-1255068 | q1 | q2 | OK | 160.291 | 104.738 | -0.613911   | 0.43006   | 0.667155  | 0.986963 |
| gene1227 | gene1227 | fabD      | gi 57650036 ref NC_002951.2 :1252435-1255068 | q1 | q2 | OK | 117.61  | 86.3511 | -0.445723   | 0.26419   | 0.791633  | 0.986986 |
| gene1228 | gene1228 | fabG1     | gi 57650036 ref NC_002951.2 :1252435-1255068 | q1 | q2 | OK | 172.846 | 131.931 | -0.389703   | 0.24367   | 0.807489  | 0.9909   |
| gene1229 | gene1229 | SACOL1246 | gi 57650036 ref NC_002951.2 :1255190-1255289 | q1 | q2 | OK | 7316.17 | 0       | -1.79769e+; | -1.79769e | 0.117533  | 0.723345 |
| gene123  | gene123  | SACOL0127 | gi 57650036 ref NC_002951.2 :142033-142807   | q1 | q2 | OK | 28.6702 | 36.902  | 0.364148    | -0.7439   | 0.456936  | 0.950521 |
| gene1230 | gene1230 | acpP      | gi 57650036 ref NC_002951.2 :1255310-1255544 | q1 | q2 | OK | 343.874 | 184.783 | -0.896045   | 1.77394   | 0.0760727 | 0.618185 |
| gene1231 | gene1231 | rnc       | gi 57650036 ref NC_002951.2 :1255659-1256391 | q1 | q2 | OK | 138.645 | 134.578 | -0.04295    | 0.07824   | 0.937636  | 0.996932 |
| gene1232 | gene1232 | SACOL1250 | gi 57650036 ref NC_002951.2 :1256537-1261673 | q1 | q2 | OK | 56.5742 | 49.9413 | -0.179911   | 0.16071   | 0.872319  | 0.996923 |

|          |          |           |                                              |    |    |    |         |         |           |          |           |           |
|----------|----------|-----------|----------------------------------------------|----|----|----|---------|---------|-----------|----------|-----------|-----------|
| gene1233 | gene1233 | SACOL1251 | gi 57650036 ref NC_002951.2 :1256537-1261673 | q1 | q2 | OK | 86.2309 | 66.724  | -0.369999 | 0.22275  | 0.823734  | 0.992727  |
| gene1234 | gene1234 | SACOL1252 | gi 57650036 ref NC_002951.2 :1256537-1261673 | q1 | q2 | OK | 91.0458 | 51.8598 | -0.811977 | 0.17656  | 0.859855  | 0.996923  |
| gene1235 | gene1235 | ffh       | gi 57650036 ref NC_002951.2 :1261698-1263066 | q1 | q2 | OK | 233.058 | 145.491 | -0.679756 | 0.80388  | 0.421468  | 0.939652  |
| gene1236 | gene1236 | rpsP      | gi 57650036 ref NC_002951.2 :1263500-1263776 | q1 | q2 | OK | 167.578 | 50.6701 | -1.72562  | 3.15045  | 0.0016302 | 0.0730966 |
| gene1237 | gene1237 | rimM      | gi 57650036 ref NC_002951.2 :1263963-1265204 | q1 | q2 | OK | 39.709  | 37.8639 | -0.068642 | 0.07236  | 0.942312  | 0.996932  |
| gene1238 | gene1238 | trmD      | gi 57650036 ref NC_002951.2 :1263963-1265204 | q1 | q2 | OK | 64.8312 | 55.2499 | -0.230714 | 0.39588  | 0.692191  | 0.986963  |
| gene1239 | gene1239 | rplS      | gi 57650036 ref NC_002951.2 :1265306-1265657 | q1 | q2 | OK | 242.288 | 126.43  | -0.938391 | 1.91648  | 0.0553041 | 0.538882  |
| gene124  | gene124  | SACOL0128 | gi 57650036 ref NC_002951.2 :143020-143977   | q1 | q2 | OK | 24.0642 | 38.2577 | 0.668864  | -1.37589 | 0.168857  | 0.814226  |
| gene1240 | gene1240 | SACOL1259 | gi 57650036 ref NC_002951.2 :1265900-1268507 | q1 | q2 | OK | 60.4558 | 58.6978 | -0.042576 | 0.05961  | 0.952466  | 0.996932  |
| gene1241 | gene1241 | rbgA      | gi 57650036 ref NC_002951.2 :1268907-1270543 | q1 | q2 | OK | 54.1002 | 38.2253 | -0.501104 | 0.68604  | 0.492691  | 0.964002  |
| gene1242 | gene1242 | rnhB      | gi 57650036 ref NC_002951.2 :1268907-1270543 | q1 | q2 | OK | 59.6524 | 43.3806 | -0.459528 | 0.60772  | 0.543373  | 0.979019  |
| gene1243 | gene1243 | sucC      | gi 57650036 ref NC_002951.2 :1270651-1271818 | q1 | q2 | OK | 1232.64 | 609.843 | -1.01524  | 0.9357   | 0.349426  | 0.913467  |
| gene1244 | gene1244 | sucD      | gi 57650036 ref NC_002951.2 :1271839-1272748 | q1 | q2 | OK | 1568.79 | 788.954 | -0.991637 | 0.91517  | 0.360102  | 0.923053  |
| gene1245 | gene1245 | lytN      | gi 57650036 ref NC_002951.2 :1272941-1274093 | q1 | q2 | OK | 41.9895 | 46.9337 | 0.160595  | -0.3262  | 0.744273  | 0.986963  |
| gene1246 | gene1246 | eprH      | gi 57650036 ref NC_002951.2 :1274120-1275365 | q1 | q2 | OK | 29.871  | 31.7453 | 0.0877979 | -0.18163 | 0.855873  | 0.996923  |
| gene1247 | gene1247 | SACOL1266 | gi 57650036 ref NC_002951.2 :1275537-1276410 | q1 | q2 | OK | 33.0136 | 56.1316 | 0.765753  | -1.57613 | 0.114996  | 0.723345  |
| gene1248 | gene1248 | topA      | gi 57650036 ref NC_002951.2 :1276589-1278659 | q1 | q2 | OK | 152.031 | 82.0558 | -0.889687 | 1.06488  | 0.28693   | 0.887342  |
| gene1249 | gene1249 | gid       | gi 57650036 ref NC_002951.2 :1278814-1280122 | q1 | q2 | OK | 207.273 | 100.246 | -1.04799  | 1.37716  | 0.168463  | 0.814226  |
| gene125  | gene125  | SACOL0129 | gi 57650036 ref NC_002951.2 :144205-145750   | q1 | q2 | OK | 61.5018 | 86.6899 | 0.495235  | -0.80957 | 0.418185  | 0.939652  |
| gene1250 | gene1250 | xerC      | gi 57650036 ref NC_002951.2 :1280538-1281977 | q1 | q2 | OK | 174.396 | 180.51  | 0.0497194 | -0.04828 | 0.961496  | 0.996932  |
| gene1251 | gene1251 | hslV      | gi 57650036 ref NC_002951.2 :1280538-1281977 | q1 | q2 | OK | 211.387 | 189.639 | -0.156633 | 0.11576  | 0.907845  | 0.996932  |
| gene1252 | gene1252 | hslU      | gi 57650036 ref NC_002951.2 :1282042-1283446 | q1 | q2 | OK | 234.782 | 196.536 | -0.256526 | 0.28543  | 0.775317  | 0.986963  |
| gene1253 | gene1253 | codY      | gi 57650036 ref NC_002951.2 :1283470-1284244 | q1 | q2 | OK | 317.474 | 183.168 | -0.793473 | 1.10106  | 0.270873  | 0.875983  |
| gene1254 | gene1254 | rpsB      | gi 57650036 ref NC_002951.2 :1284585-1285350 | q1 | q2 | OK | 733.208 | 112.644 | -2.70245  | 3.32283  | 0.0008911 | 0.0497224 |
| gene1255 | gene1255 | SACOL1275 | gi 57650036 ref NC_002951.2 :1285395-1285509 | q1 | q2 | OK | 135.445 | 270.736 | 0.999183  | -0.42406 | 0.671521  | 0.986963  |
| gene1256 | gene1256 | tsf       | gi 57650036 ref NC_002951.2 :1285543-1286425 | q1 | q2 | OK | 745.67  | 363.658 | -1.03595  | 1.06258  | 0.287971  | 0.887342  |
| gene1257 | gene1257 | pyrH      | gi 57650036 ref NC_002951.2 :1286561-1287284 | q1 | q2 | OK | 105.412 | 97.1687 | -0.117483 | 0.23056  | 0.817659  | 0.991377  |
| gene1258 | gene1258 | frr       | gi 57650036 ref NC_002951.2 :1287302-1287857 | q1 | q2 | OK | 148.025 | 111.53  | -0.408401 | 0.81472  | 0.415235  | 0.939652  |
| gene1259 | gene1259 | uppS      | gi 57650036 ref NC_002951.2 :1288229-1289000 | q1 | q2 | OK | 63.9651 | 57.3211 | -0.158218 | 0.32591  | 0.744492  | 0.986963  |
| gene126  | gene126  | SACOL0130 | gi 57650036 ref NC_002951.2 :145800-147336   | q1 | q2 | OK | 58.7777 | 45.7343 | -0.361993 | 0.67036  | 0.502626  | 0.965124  |
| gene1260 | gene1260 | cdsA      | gi 57650036 ref NC_002951.2 :1289006-1289789 | q1 | q2 | OK | 41.2446 | 70.9351 | 0.782294  | -1.60587 | 0.108303  | 0.711606  |
| gene1261 | gene1261 | SACOL1281 | gi 57650036 ref NC_002951.2 :1290025-1291312 | q1 | q2 | OK | 104.653 | 87.3027 | -0.261517 | 0.41913  | 0.675124  | 0.986963  |
| gene1262 | gene1262 | proS      | gi 57650036 ref NC_002951.2 :1291331-1293035 | q1 | q2 | OK | 92.5616 | 66.9371 | -0.467607 | 0.70689  | 0.479638  | 0.960423  |

|          |          |           |                                              |    |    |        |         |         |           |          |           |           |
|----------|----------|-----------|----------------------------------------------|----|----|--------|---------|---------|-----------|----------|-----------|-----------|
| gene1263 | gene1263 | polC      | gi 57650036 ref NC_002951.2 :1293298-1297609 | q1 | q2 | OK     | 67.5939 | 63.7821 | -0.083743 | 0.09232  | 0.926445  | 0.996932  |
| gene1264 | gene1264 | SACOL1284 | gi 57650036 ref NC_002951.2 :1297898-1298366 | q1 | q2 | OK     | 218.988 | 97.7964 | -1.163    | 2.30158  | 0.0213586 | 0.341601  |
| gene1265 | gene1265 | nusA      | gi 57650036 ref NC_002951.2 :1298386-1299562 | q1 | q2 | OK     | 164.758 | 75.2235 | -1.13109  | 1.71307  | 0.0866992 | 0.638501  |
| gene1266 | gene1266 | SACOL1286 | gi 57650036 ref NC_002951.2 :1299582-1300181 | q1 | q2 | OK     | 184.558 | 73.338  | -1.33144  | 1.45129  | 0.146699  | 0.783746  |
| gene1267 | gene1267 | SACOL1287 | gi 57650036 ref NC_002951.2 :1299582-1300181 | q1 | q2 | OK     | 309.19  | 133.706 | -1.20942  | 1.98366  | 0.0472935 | 0.493802  |
| gene1268 | gene1268 | infB      | gi 57650036 ref NC_002951.2 :1300185-1302303 | q1 | q2 | OK     | 361.641 | 151.431 | -1.25589  | 1.24137  | 0.214467  | 0.834927  |
| gene1269 | gene1269 | rbfA      | gi 57650036 ref NC_002951.2 :1302688-1303039 | q1 | q2 | OK     | 386.008 | 84.0246 | -2.19975  | 4.22913  | 2.35E-05  | 0.0058907 |
| gene127  | gene127  | SACOL0132 | gi 57650036 ref NC_002951.2 :147862-148756   | q1 | q2 | NOTEST | 0       | 0       | 0         | 0        | 1         | 1         |
| gene1270 | gene1270 | truB      | gi 57650036 ref NC_002951.2 :1303207-1304125 | q1 | q2 | OK     | 50.4808 | 83.0915 | 0.718966  | -1.4289  | 0.153032  | 0.793468  |
| gene1271 | gene1271 | ribF      | gi 57650036 ref NC_002951.2 :1304139-1305111 | q1 | q2 | OK     | 128.728 | 173.747 | 0.432663  | -0.65817 | 0.510432  | 0.971029  |
| gene1272 | gene1272 | rpsO      | gi 57650036 ref NC_002951.2 :1305225-1305495 | q1 | q2 | OK     | 723.576 | 504.275 | -0.520933 | 1.00445  | 0.315159  | 0.892668  |
| gene1273 | gene1273 | pnp       | gi 57650036 ref NC_002951.2 :1305864-1307961 | q1 | q2 | OK     | 175.984 | 141.831 | -0.311271 | 0.33201  | 0.739882  | 0.986963  |
| gene1274 | gene1274 | SACOL1294 | gi 57650036 ref NC_002951.2 :1308298-1309870 | q1 | q2 | OK     | 357.129 | 242.07  | -0.561023 | 0.55771  | 0.577043  | 0.985265  |
| gene1275 | gene1275 | SACOL1295 | gi 57650036 ref NC_002951.2 :1310116-1312495 | q1 | q2 | OK     | 70.7214 | 85.505  | 0.273863  | -0.35667 | 0.721339  | 0.986963  |
| gene1276 | gene1276 | SACOL1296 | gi 57650036 ref NC_002951.2 :1312499-1313213 | q1 | q2 | OK     | 31.4036 | 38.0822 | 0.278188  | -0.56676 | 0.57088   | 0.985265  |
| gene1277 | gene1277 | SACOL1297 | gi 57650036 ref NC_002951.2 :1313243-1316499 | q1 | q2 | OK     | 22.8701 | 36.0131 | 0.655057  | -0.57055 | 0.568303  | 0.985265  |
| gene1278 | gene1278 | SACOL1298 | gi 57650036 ref NC_002951.2 :1313243-1316499 | q1 | q2 | OK     | 34.6431 | 40.4778 | 0.224563  | -0.22517 | 0.821849  | 0.992727  |
| gene1279 | gene1279 | SACOL1299 | gi 57650036 ref NC_002951.2 :1313243-1316499 | q1 | q2 | OK     | 61.7047 | 62.5384 | 0.0193613 | -0.01716 | 0.986307  | 0.998143  |
| gene128  | gene128  | SACOL0134 | gi 57650036 ref NC_002951.2 :149516-150001   | q1 | q2 | OK     | 4.02681 | 7.43629 | 0.884946  | -1.11634 | 0.264278  | 0.875983  |
| gene1280 | gene1280 | SACOL1300 | gi 57650036 ref NC_002951.2 :1316603-1317431 | q1 | q2 | OK     | 150.199 | 118.452 | -0.342577 | 0.5931   | 0.553115  | 0.981439  |
| gene1281 | gene1281 | SACOL1301 | gi 57650036 ref NC_002951.2 :1317449-1317842 | q1 | q2 | OK     | 132.763 | 80.4732 | -0.722275 | 1.47887  | 0.139176  | 0.763035  |
| gene1282 | gene1282 | pgsA      | gi 57650036 ref NC_002951.2 :1317875-1318454 | q1 | q2 | OK     | 203.39  | 155.83  | -0.384273 | 0.70701  | 0.479561  | 0.960423  |
| gene1283 | gene1283 | SACOL1303 | gi 57650036 ref NC_002951.2 :1318680-1319832 | q1 | q2 | OK     | 84.6848 | 96.7326 | 0.191899  | -0.33178 | 0.740056  | 0.986963  |
| gene1284 | gene1284 | recA      | gi 57650036 ref NC_002951.2 :1319996-1321040 | q1 | q2 | OK     | 425.488 | 387.848 | -0.133628 | 0.13689  | 0.891118  | 0.996932  |
| gene1285 | gene1285 | SACOL1305 | gi 57650036 ref NC_002951.2 :1321393-1322953 | q1 | q2 | OK     | 637.807 | 1152.34 | 0.853369  | -0.78238 | 0.433989  | 0.940247  |
| gene1286 | gene1286 | SACOL1306 | gi 57650036 ref NC_002951.2 :1323249-1323465 | q1 | q2 | OK     | 374.934 | 954.071 | 1.34746   | -2.75854 | 0.005806  | 0.153462  |
| gene1287 | gene1287 | SACOL1307 | gi 57650036 ref NC_002951.2 :1323638-1324436 | q1 | q2 | OK     | 193.398 | 107.463 | -0.847739 | 1.41715  | 0.156439  | 0.797219  |
| gene1288 | gene1288 | SACOL1308 | gi 57650036 ref NC_002951.2 :1324575-1326336 | q1 | q2 | OK     | 120.981 | 59.1571 | -1.03216  | 1.46372  | 0.143269  | 0.776996  |
| gene1289 | gene1289 | SACOL1309 | gi 57650036 ref NC_002951.2 :1326336-1327203 | q1 | q2 | OK     | 185.704 | 84.2592 | -1.1401   | 1.89345  | 0.0582985 | 0.540443  |
| gene129  | gene129  | SACOL0135 | gi 57650036 ref NC_002951.2 :150450-153060   | q1 | q2 | OK     | 34.2872 | 45.8214 | 0.418349  | -0.69532 | 0.486854  | 0.964002  |
| gene1290 | gene1290 | SACOL1310 | gi 57650036 ref NC_002951.2 :1327296-1327590 | q1 | q2 | OK     | 14.815  | 18.949  | 0.35507   | -0.47444 | 0.63519   | 0.986963  |
| gene1291 | gene1291 | miaB      | gi 57650036 ref NC_002951.2 :1327723-1329268 | q1 | q2 | OK     | 79.5659 | 56.8872 | -0.484045 | 0.81675  | 0.414071  | 0.939652  |
| gene1292 | gene1292 | SACOL1313 | gi 57650036 ref NC_002951.2 :1329268-1329634 | q1 | q2 | OK     | 162.727 | 110.339 | -0.56051  | 1.15483  | 0.24816   | 0.869586  |

|          |          |           |                                              |    |    |        |         |         |             |             |           |           |
|----------|----------|-----------|----------------------------------------------|----|----|--------|---------|---------|-------------|-------------|-----------|-----------|
| gene1293 | gene1293 | SACOL1314 | gi 57650036 ref NC_002951.2 :1329660-1330152 | q1 | q2 | OK     | 121.766 | 84.2234 | -0.531812   | 1.09585     | 0.273144  | 0.879648  |
| gene1294 | gene1294 | hexA      | gi 57650036 ref NC_002951.2 :1330454-1333073 | q1 | q2 | OK     | 50.6757 | 59.2772 | 0.226183    | -0.32763    | 0.743195  | 0.986963  |
| gene1295 | gene1295 | mutL      | gi 57650036 ref NC_002951.2 :1333085-1335095 | q1 | q2 | OK     | 35.2278 | 43.4969 | 0.304198    | -0.5616     | 0.574387  | 0.985265  |
| gene1296 | gene1296 | glpP      | gi 57650036 ref NC_002951.2 :1335100-1335643 | q1 | q2 | OK     | 59.379  | 52.1169 | -0.1882     | 0.38586     | 0.6996    | 0.986963  |
| gene1297 | gene1297 | glpF      | gi 57650036 ref NC_002951.2 :1336107-1336926 | q1 | q2 | OK     | 779.9   | 98.3048 | -2.98796    | 3.6113      | 0.0003047 | 0.0268229 |
| gene1298 | gene1298 | glpK      | gi 57650036 ref NC_002951.2 :1337054-1338551 | q1 | q2 | OK     | 426.75  | 70.4357 | -2.59901    | 3.02393     | 0.0024952 | 0.0994497 |
| gene1299 | gene1299 | glpD      | gi 57650036 ref NC_002951.2 :1338708-1340382 | q1 | q2 | OK     | 975.565 | 175.853 | -2.47187    | 2.48132     | 0.0130897 | 0.265066  |
| gene13   | gene13   | SACOL0014 | gi 57650036 ref NC_002951.2 :18344-20755     | q1 | q2 | OK     | 183.914 | 115.708 | -0.668548   | 0.61286     | 0.539971  | 0.978583  |
| gene130  | gene130  | cap5A     | gi 57650036 ref NC_002951.2 :153404-154073   | q1 | q2 | OK     | 44.6394 | 326.32  | 2.8699      | -4.57236    | 4.82E-06  | 0.0030274 |
| gene1300 | gene1300 | SACOL1322 | gi 57650036 ref NC_002951.2 :1340531-1341446 | q1 | q2 | OK     | 40.4541 | 27.8106 | -0.54065    | 1.11475     | 0.264958  | 0.875983  |
| gene1301 | gene1301 | miaA      | gi 57650036 ref NC_002951.2 :1341463-1342399 | q1 | q2 | OK     | 114.873 | 65.6573 | -0.807007   | 1.4945      | 0.135044  | 0.753545  |
| gene1302 | gene1302 | SACOL1324 | gi 57650036 ref NC_002951.2 :1342413-1342647 | q1 | q2 | OK     | 214.044 | 85.0976 | -1.33072    | 2.39863     | 0.0164565 | 0.299437  |
| gene1303 | gene1303 | gpxA1     | gi 57650036 ref NC_002951.2 :1342868-1343345 | q1 | q2 | OK     | 343.289 | 167.146 | -1.03831    | 1.84225     | 0.0654392 | 0.57234   |
| gene1304 | gene1304 | SACOL1326 | gi 57650036 ref NC_002951.2 :1343456-1344695 | q1 | q2 | OK     | 61.1576 | 40.6895 | -0.587875   | 1.15307     | 0.24888   | 0.869891  |
| gene1305 | gene1305 | SACOL1327 | gi 57650036 ref NC_002951.2 :1344713-1345952 | q1 | q2 | OK     | 79.6345 | 48.8274 | -0.705703   | 1.3124      | 0.189384  | 0.819847  |
| gene1306 | gene1306 | glnR      | gi 57650036 ref NC_002951.2 :1346194-1346563 | q1 | q2 | OK     | 162.599 | 212.164 | 0.383861    | -0.7904     | 0.429297  | 0.940178  |
| gene1307 | gene1307 | femC      | gi 57650036 ref NC_002951.2 :1346581-1347922 | q1 | q2 | OK     | 181.213 | 242.277 | 0.418967    | -0.47815    | 0.632541  | 0.986963  |
| gene1308 | gene1308 | SACOL1331 | gi 57650036 ref NC_002951.2 :1348414-1348612 | q1 | q2 | OK     | 3.3928  | 31.0949 | 3.19613     | -1.71286    | 0.086738  | 0.638501  |
| gene1309 | gene1309 | SACOL1332 | gi 57650036 ref NC_002951.2 :1349300-1349525 | q1 | q2 | OK     | 4.02188 | 8.52032 | 1.08304     | -0.70372    | 0.481609  | 0.961304  |
| gene131  | gene131  | cap5B     | gi 57650036 ref NC_002951.2 :154088-154775   | q1 | q2 | OK     | 33.9342 | 234.956 | 2.79158     | -4.8264     | 1.39E-06  | 0.0011636 |
| gene1310 | gene1310 | SACOL1333 | gi 57650036 ref NC_002951.2 :1349818-1350025 | q1 | q2 | OK     | 5.57116 | 16.5075 | 1.56708     | -1.06208    | 0.288199  | 0.887342  |
| gene1311 | gene1311 | SACOL1334 | gi 57650036 ref NC_002951.2 :1350725-1350836 | q1 | q2 | NOTEST | 0       | 0       | 0           | 0           | 1         | 1         |
| gene1312 | gene1312 | SACOL1335 | gi 57650036 ref NC_002951.2 :1351263-1351449 | q1 | q2 | OK     | 40.6658 | 28.6296 | -0.506307   | 0.4772      | 0.63322   | 0.986963  |
| gene1313 | gene1313 | SACOL1336 | gi 57650036 ref NC_002951.2 :1351960-1352065 | q1 | q2 | OK     | 546.116 | 0       | -1.79769e+3 | -1.79769e+3 | 0.201324  | 0.819847  |
| gene1314 | gene1314 | SACOL1337 | gi 57650036 ref NC_002951.2 :1352097-1352193 | q1 | q2 | NOTEST | 0       | 0       | 0           | 0           | 1         | 1         |
| gene1315 | gene1315 | SACOL1338 | gi 57650036 ref NC_002951.2 :1352193-1352445 | q1 | q2 | OK     | 30.5516 | 16.7864 | -0.863957   | 1.08865     | 0.27631   | 0.879877  |
| gene1316 | gene1316 | SACOL1339 | gi 57650036 ref NC_002951.2 :1352649-1353075 | q1 | q2 | OK     | 18.0078 | 36.4133 | 1.01585     | -1.78461    | 0.0743247 | 0.6119    |
| gene1317 | gene1317 | SACOL1340 | gi 57650036 ref NC_002951.2 :1353195-1353444 | q1 | q2 | OK     | 18.711  | 56.3221 | 1.58982     | -2.19098    | 0.0284536 | 0.39042   |
| gene1318 | gene1318 | SACOL1341 | gi 57650036 ref NC_002951.2 :1353573-1353675 | q1 | q2 | NOTEST | 0       | 0       | 0           | 0           | 1         | 1         |
| gene1319 | gene1319 | SACOL1342 | gi 57650036 ref NC_002951.2 :1353720-1353987 | q1 | q2 | OK     | 10.6164 | 10.8637 | 0.0332321   | -0.03538    | 0.971775  | 0.99793   |
| gene132  | gene132  | cap5C     | gi 57650036 ref NC_002951.2 :154777-155542   | q1 | q2 | OK     | 34.1478 | 156.021 | 2.19187     | -4.07498    | 4.60E-05  | 0.0084086 |
| gene1320 | gene1320 | SACOL1344 | gi 57650036 ref NC_002951.2 :1354323-1354458 | q1 | q2 | OK     | 0       | 101.074 | 1.79769e+3  | 1.79769e+3  | 0.102747  | 0.686167  |
| gene1321 | gene1321 | SACOL1345 | gi 57650036 ref NC_002951.2 :1354548-1354839 | q1 | q2 | OK     | 33.2032 | 32.8486 | -0.015493   | 0.02462     | 0.980359  | 0.998143  |



|          |          |           |                                              |    |    |        |         |         |           |          |           |          |
|----------|----------|-----------|----------------------------------------------|----|----|--------|---------|---------|-----------|----------|-----------|----------|
| gene1322 | gene1322 | SACOL1346 | gi 57650036 ref NC_002951.2 :1354849-1355044 | q1 | q2 | OK     | 43.7207 | 28.1222 | -0.636603 | 0.65945  | 0.509606  | 0.971029 |
| gene1323 | gene1323 | SACOL1347 | gi 57650036 ref NC_002951.2 :1355093-1355435 | q1 | q2 | OK     | 24.7545 | 27.3734 | 0.145085  | -0.23741 | 0.812335  | 0.991128 |
| gene1324 | gene1324 | SACOL1348 | gi 57650036 ref NC_002951.2 :1355441-1355633 | q1 | q2 | OK     | 11.7471 | 18.3267 | 0.641644  | -0.46572 | 0.641413  | 0.986963 |
| gene1325 | gene1325 | SACOL1349 | gi 57650036 ref NC_002951.2 :1356181-1357207 | q1 | q2 | OK     | 63.9499 | 81.5461 | 0.350674  | -0.67275 | 0.501109  | 0.965124 |
| gene1326 | gene1326 | SACOL1350 | gi 57650036 ref NC_002951.2 :1357476-1357674 | q1 | q2 | OK     | 98.3913 | 77.7371 | -0.339926 | 0.48595  | 0.627001  | 0.986963 |
| gene1327 | gene1327 | cls1      | gi 57650036 ref NC_002951.2 :1357731-1359213 | q1 | q2 | OK     | 125.825 | 69.0096 | -0.866548 | 1.28527  | 0.198699  | 0.819847 |
| gene1328 | gene1328 | SACOL1352 | gi 57650036 ref NC_002951.2 :1359387-1360996 | q1 | q2 | OK     | 21.2505 | 27.8583 | 0.390609  | -0.53207 | 0.594677  | 0.985953 |
| gene1329 | gene1329 | SACOL1353 | gi 57650036 ref NC_002951.2 :1359387-1360996 | q1 | q2 | OK     | 31.2207 | 49.8347 | 0.674648  | -1.02069 | 0.307403  | 0.892668 |
| gene133  | gene133  | cap5D     | gi 57650036 ref NC_002951.2 :155561-158403   | q1 | q2 | OK     | 51.2022 | 205.79  | 2.0069    | -1.86117 | 0.0627198 | 0.55727  |
| gene1330 | gene1330 | SACOL1354 | gi 57650036 ref NC_002951.2 :1360999-1362690 | q1 | q2 | OK     | 45.7219 | 47.7035 | 0.0612087 | -0.08494 | 0.93231   | 0.996932 |
| gene1331 | gene1331 | SACOL1355 | gi 57650036 ref NC_002951.2 :1360999-1362690 | q1 | q2 | OK     | 78.8798 | 69.5335 | -0.181946 | 0.21716  | 0.828088  | 0.993943 |
| gene1332 | gene1332 | SACOL1356 | gi 57650036 ref NC_002951.2 :1362962-1363070 | q1 | q2 | NOTEST | 0       | 0       | 0         | 0        | 1         | 1        |
| gene1333 | gene1333 | SACOL1357 | gi 57650036 ref NC_002951.2 :1363129-1363663 | q1 | q2 | OK     | 35.1755 | 40.2772 | 0.195392  | -0.38627 | 0.699295  | 0.986963 |
| gene1334 | gene1334 | SACOL1358 | gi 57650036 ref NC_002951.2 :1363805-1364660 | q1 | q2 | OK     | 158.276 | 126.284 | -0.325768 | 0.54339  | 0.586858  | 0.985265 |
| gene1335 | gene1335 | SACOL1359 | gi 57650036 ref NC_002951.2 :1364975-1365566 | q1 | q2 | OK     | 123.331 | 92.629  | -0.412995 | 0.83375  | 0.404421  | 0.939607 |
| gene1336 | gene1336 | SACOL1360 | gi 57650036 ref NC_002951.2 :1365619-1367002 | q1 | q2 | OK     | 44.7595 | 68.5313 | 0.61457   | -1.14642 | 0.251622  | 0.87389  |
| gene1337 | gene1337 | SACOL1361 | gi 57650036 ref NC_002951.2 :1367007-1367115 | q1 | q2 | NOTEST | 0       | 0       | 0         | 0        | 1         | 1        |
| gene1338 | gene1338 | hom       | gi 57650036 ref NC_002951.2 :1367192-1368473 | q1 | q2 | OK     | 389.369 | 758.589 | 0.962182  | -0.90674 | 0.364543  | 0.926565 |
| gene1339 | gene1339 | thrC      | gi 57650036 ref NC_002951.2 :1368478-1369540 | q1 | q2 | OK     | 240.435 | 470.449 | 0.968391  | -1.0429  | 0.296994  | 0.892668 |
| gene134  | gene134  | cap5E     | gi 57650036 ref NC_002951.2 :155561-158403   | q1 | q2 | OK     | 56.4667 | 181.422 | 1.68388   | -1.08956 | 0.275908  | 0.879877 |
| gene1340 | gene1340 | thrB      | gi 57650036 ref NC_002951.2 :1369541-1370456 | q1 | q2 | OK     | 101.368 | 246.323 | 1.28095   | -1.8943  | 0.0581845 | 0.540443 |
| gene1341 | gene1341 | SACOL1365 | gi 57650036 ref NC_002951.2 :1370513-1371317 | q1 | q2 | OK     | 129.656 | 283.729 | 1.12983   | -1.66558 | 0.0957979 | 0.664499 |
| gene1342 | gene1342 | SACOL1366 | gi 57650036 ref NC_002951.2 :1371609-1371924 | q1 | q2 | OK     | 147.465 | 58.88   | -1.32453  | 2.56458  | 0.0103301 | 0.237971 |
| gene1343 | gene1343 | SACOL1367 | gi 57650036 ref NC_002951.2 :1372141-1373596 | q1 | q2 | OK     | 77.4039 | 103.112 | 0.41374   | -0.64086 | 0.521616  | 0.972546 |
| gene1344 | gene1344 | kataA     | gi 57650036 ref NC_002951.2 :1373895-1375317 | q1 | q2 | OK     | 965.771 | 1313.3  | 0.443445  | -0.40761 | 0.683558  | 0.986963 |
| gene1345 | gene1345 | rpmG      | gi 57650036 ref NC_002951.2 :1375407-1375557 | q1 | q2 | OK     | 99.2507 | 341.63  | 1.78329   | -2.00069 | 0.0454255 | 0.481552 |
| gene1346 | gene1346 | rpsN      | gi 57650036 ref NC_002951.2 :1376010-1376280 | q1 | q2 | OK     | 28.6225 | 39.0213 | 0.447114  | -0.67878 | 0.497279  | 0.964002 |
| gene1347 | gene1347 | guaC      | gi 57650036 ref NC_002951.2 :1376436-1377515 | q1 | q2 | OK     | 47.1645 | 41.9035 | -0.17063  | 0.35166  | 0.725093  | 0.986963 |
| gene1348 | gene1348 | SACOL1372 | gi 57650036 ref NC_002951.2 :1376436-1377515 | q1 | q2 | NOTEST | 0       | 0       | 0         | 0        | 1         | 1        |
| gene1349 | gene1349 | SACOL1373 | gi 57650036 ref NC_002951.2 :1377588-1378452 | q1 | q2 | OK     | 62.3904 | 42.8974 | -0.540433 | 1.10912  | 0.267377  | 0.875983 |
| gene135  | gene135  | cap5F     | gi 57650036 ref NC_002951.2 :158415-159525   | q1 | q2 | OK     | 37.5979 | 123.932 | 1.72083   | -3.01893 | 0.0025367 | 0.099524 |
| gene1350 | gene1350 | lexA      | gi 57650036 ref NC_002951.2 :1378831-1379455 | q1 | q2 | OK     | 688.573 | 504.928 | -0.447532 | 0.49787  | 0.618576  | 0.986963 |
| gene1351 | gene1351 | SACOL1375 | gi 57650036 ref NC_002951.2 :1379597-1379831 | q1 | q2 | OK     | 80.7051 | 51.0585 | -0.660507 | 1.04154  | 0.297624  | 0.892668 |

|          |          |           |                                              |    |    |        |         |         |           |          |           |          |
|----------|----------|-----------|----------------------------------------------|----|----|--------|---------|---------|-----------|----------|-----------|----------|
| gene1352 | gene1352 | SACOL1376 | gi 57650036 ref NC_002951.2 :1379966-1380206 | q1 | q2 | OK     | 79.0994 | 53.0829 | -0.575419 | 0.92993  | 0.352407  | 0.914147 |
| gene1353 | gene1353 | tkt       | gi 57650036 ref NC_002951.2 :1380326-1382315 | q1 | q2 | OK     | 339.447 | 300.257 | -0.176988 | 0.166    | 0.868156  | 0.996923 |
| gene1354 | gene1354 | SACOL1378 | gi 57650036 ref NC_002951.2 :1382592-1382920 | q1 | q2 | OK     | 215.687 | 71.9024 | -1.58483  | 2.85756  | 0.0042692 | 0.131239 |
| gene1355 | gene1355 | SACOL1379 | gi 57650036 ref NC_002951.2 :1382592-1382920 | q1 | q2 | NOTEST | 0       | 0       | 0         | 0        | 1         | 1        |
| gene1356 | gene1356 | SACOL1380 | gi 57650036 ref NC_002951.2 :1383013-1383481 | q1 | q2 | OK     | 25.1488 | 29.1999 | 0.215474  | -0.39604 | 0.692079  | 0.986963 |
| gene1357 | gene1357 | sbcD      | gi 57650036 ref NC_002951.2 :1383604-1384726 | q1 | q2 | OK     | 45.4955 | 65.7502 | 0.531271  | -1.04892 | 0.294213  | 0.891156 |
| gene1358 | gene1358 | sbcC      | gi 57650036 ref NC_002951.2 :1384729-1387759 | q1 | q2 | OK     | 30.7888 | 33.1171 | 0.105174  | -0.17985 | 0.857272  | 0.996923 |
| gene1359 | gene1359 | mscL      | gi 57650036 ref NC_002951.2 :1387829-1388192 | q1 | q2 | OK     | 186.722 | 245.605 | 0.395445  | -0.80816 | 0.419     | 0.939652 |
| gene136  | gene136  | cap5G     | gi 57650036 ref NC_002951.2 :159528-160653   | q1 | q2 | OK     | 32.6539 | 93.8904 | 1.52372   | -2.8614  | 0.0042178 | 0.131239 |
| gene1360 | gene1360 | opuD1     | gi 57650036 ref NC_002951.2 :1388395-1390042 | q1 | q2 | OK     | 91.0476 | 83.1803 | -0.13038  | 0.19281  | 0.84711   | 0.996923 |
| gene1361 | gene1361 | acnA      | gi 57650036 ref NC_002951.2 :1390933-1393639 | q1 | q2 | OK     | 595.591 | 571.233 | -0.060242 | 0.05548  | 0.955759  | 0.996932 |
| gene1362 | gene1362 | SACOL1386 | gi 57650036 ref NC_002951.2 :1393818-1394286 | q1 | q2 | OK     | 119.166 | 104.285 | -0.192444 | 0.39791  | 0.690697  | 0.986963 |
| gene1363 | gene1363 | SACOL1387 | gi 57650036 ref NC_002951.2 :1394492-1394789 | q1 | q2 | OK     | 133.831 | 235.343 | 0.814356  | -1.66803 | 0.09531   | 0.664499 |
| gene1364 | gene1364 | SACOL1388 | gi 57650036 ref NC_002951.2 :1395164-1395773 | q1 | q2 | OK     | 166.647 | 123.771 | -0.429117 | 0.81822  | 0.413231  | 0.939652 |
| gene1365 | gene1365 | parE      | gi 57650036 ref NC_002951.2 :1395972-1400372 | q1 | q2 | OK     | 110.738 | 88.0787 | -0.330285 | 0.24389  | 0.807313  | 0.9909   |
| gene1366 | gene1366 | parC      | gi 57650036 ref NC_002951.2 :1395972-1400372 | q1 | q2 | OK     | 103.804 | 52.1184 | -0.993995 | 0.70898  | 0.478335  | 0.960423 |
| gene1367 | gene1367 | SACOL1392 | gi 57650036 ref NC_002951.2 :1400621-1402097 | q1 | q2 | OK     | 145.597 | 62.9899 | -1.20879  | 1.74901  | 0.0802897 | 0.628579 |
| gene1368 | gene1368 | SACOL1393 | gi 57650036 ref NC_002951.2 :1402581-1404776 | q1 | q2 | OK     | 53.3291 | 45.8399 | -0.218317 | 0.09148  | 0.927114  | 0.996932 |
| gene1369 | gene1369 | SACOL1394 | gi 57650036 ref NC_002951.2 :1402581-1404776 | q1 | q2 | OK     | 52.3275 | 49.3357 | -0.084937 | 0.00489  | 0.996099  | 0.998434 |
| gene137  | gene137  | cap5H     | gi 57650036 ref NC_002951.2 :160655-161282   | q1 | q2 | NOTEST | 0       | 0       | 0         | 0        | 1         | 1        |
| gene1370 | gene1370 | SACOL1395 | gi 57650036 ref NC_002951.2 :1402581-1404776 | q1 | q2 | OK     | 178.539 | 227.434 | 0.349213  | -0.36945 | 0.711796  | 0.986963 |
| gene1371 | gene1371 | fmtC      | gi 57650036 ref NC_002951.2 :1405256-1407779 | q1 | q2 | OK     | 126.307 | 180.944 | 0.51861   | -0.53177 | 0.594888  | 0.985953 |
| gene1372 | gene1372 | msrA      | gi 57650036 ref NC_002951.2 :1407981-1408491 | q1 | q2 | OK     | 153.326 | 90.9047 | -0.754172 | 1.52833  | 0.12643   | 0.732386 |
| gene1373 | gene1373 | SACOL1398 | gi 57650036 ref NC_002951.2 :1408627-1409611 | q1 | q2 | OK     | 72.6375 | 41.9198 | -0.793082 | 1.58617  | 0.112701  | 0.720082 |
| gene1374 | gene1374 | dmpI      | gi 57650036 ref NC_002951.2 :1409698-1409884 | q1 | q2 | OK     | 135.553 | 35.787  | -1.92134  | 2.15909  | 0.030843  | 0.418631 |
| gene1375 | gene1375 | SACOL1400 | gi 57650036 ref NC_002951.2 :1410031-1411294 | q1 | q2 | OK     | 40.1589 | 62.9224 | 0.647855  | -1.26301 | 0.206585  | 0.823389 |
| gene1376 | gene1376 | tyrA      | gi 57650036 ref NC_002951.2 :1411430-1412522 | q1 | q2 | OK     | 64.5118 | 84.7901 | 0.394333  | -0.73824 | 0.460371  | 0.950591 |
| gene1377 | gene1377 | SACOL1402 | gi 57650036 ref NC_002951.2 :1412686-1413718 | q1 | q2 | OK     | 76.7689 | 80.3472 | 0.0657261 | -0.12381 | 0.901462  | 0.996932 |
| gene1378 | gene1378 | trpE      | gi 57650036 ref NC_002951.2 :1414209-1416179 | q1 | q2 | OK     | 18.117  | 27.3288 | 0.593084  | -1.0072  | 0.313838  | 0.892668 |
| gene1379 | gene1379 | trpG      | gi 57650036 ref NC_002951.2 :1414209-1416179 | q1 | q2 | OK     | 27.8981 | 34.4102 | 0.302672  | -0.34091 | 0.733172  | 0.986963 |
| gene138  | gene138  | cap5I     | gi 57650036 ref NC_002951.2 :161286-162396   | q1 | q2 | NOTEST | 0       | 0       | 0         | 0        | 1         | 1        |
| gene1380 | gene1380 | trpD      | gi 57650036 ref NC_002951.2 :1416184-1417183 | q1 | q2 | OK     | 46.2494 | 59.9423 | 0.374139  | -0.75849 | 0.448158  | 0.948742 |
| gene1381 | gene1381 | trpC      | gi 57650036 ref NC_002951.2 :1417184-1420527 | q1 | q2 | OK     | 26.9314 | 38.1111 | 0.500921  | -0.41141 | 0.68077   | 0.986963 |

|          |          |           |                                              |    |    |        |         |         |           |          |           |          |
|----------|----------|-----------|----------------------------------------------|----|----|--------|---------|---------|-----------|----------|-----------|----------|
| gene1382 | gene1382 | trpF      | gi 57650036 ref NC_002951.2 :1417184-1420527 | q1 | q2 | OK     | 25.0121 | 32.3819 | 0.372558  | -0.25082 | 0.80195   | 0.989625 |
| gene1383 | gene1383 | trpB      | gi 57650036 ref NC_002951.2 :1417184-1420527 | q1 | q2 | OK     | 34.486  | 42.1479 | 0.28945   | -0.33874 | 0.734805  | 0.986963 |
| gene1384 | gene1384 | trpA      | gi 57650036 ref NC_002951.2 :1417184-1420527 | q1 | q2 | OK     | 25.606  | 27.838  | 0.120571  | -0.08583 | 0.931602  | 0.996932 |
| gene1385 | gene1385 | femA      | gi 57650036 ref NC_002951.2 :1420809-1422111 | q1 | q2 | OK     | 170.718 | 241.148 | 0.498308  | -0.5816  | 0.560839  | 0.984802 |
| gene1386 | gene1386 | SACOL1411 | gi 57650036 ref NC_002951.2 :1422129-1423389 | q1 | q2 | OK     | 252.107 | 262.702 | 0.0593905 | -0.06492 | 0.948238  | 0.996932 |
| gene1387 | gene1387 | SACOL1412 | gi 57650036 ref NC_002951.2 :1424071-1424839 | q1 | q2 | OK     | 42.2779 | 53.0961 | 0.328702  | -0.6808  | 0.495999  | 0.964002 |
| gene1388 | gene1388 | SACOL1413 | gi 57650036 ref NC_002951.2 :1424886-1425360 | q1 | q2 | OK     | 126.302 | 118.933 | -0.086729 | 0.17855  | 0.858288  | 0.996923 |
| gene1389 | gene1389 | SACOL1414 | gi 57650036 ref NC_002951.2 :1425483-1428747 | q1 | q2 | OK     | 41.2235 | 45.0738 | 0.128824  | -0.10282 | 0.918106  | 0.996932 |
| gene139  | gene139  | cap5J     | gi 57650036 ref NC_002951.2 :162409-164774   | q1 | q2 | NOTEST | 0       | 0       | 0         | 0        | 1         | 1        |
| gene1390 | gene1390 | SACOL1415 | gi 57650036 ref NC_002951.2 :1425483-1428747 | q1 | q2 | OK     | 27.1411 | 39.3621 | 0.536329  | -0.40305 | 0.686914  | 0.986963 |
| gene1391 | gene1391 | SACOL1416 | gi 57650036 ref NC_002951.2 :1425483-1428747 | q1 | q2 | OK     | 35.9822 | 56.3001 | 0.645852  | -0.59733 | 0.55029   | 0.979019 |
| gene1392 | gene1392 | SACOL1417 | gi 57650036 ref NC_002951.2 :1425483-1428747 | q1 | q2 | OK     | 22.8987 | 37.4885 | 0.711185  | -0.59108 | 0.554469  | 0.981439 |
| gene1393 | gene1393 | SACOL1418 | gi 57650036 ref NC_002951.2 :1429050-1429395 | q1 | q2 | OK     | 55.8982 | 56.995  | 0.0280347 | -0.05304 | 0.957703  | 0.996932 |
| gene1394 | gene1394 | SACOL1419 | gi 57650036 ref NC_002951.2 :1429599-1431414 | q1 | q2 | OK     | 65.2482 | 122.259 | 0.905932  | -1.2473  | 0.212286  | 0.831197 |
| gene1395 | gene1395 | SACOL1420 | gi 57650036 ref NC_002951.2 :1431553-1432195 | q1 | q2 | OK     | 20.7827 | 22.1697 | 0.093207  | -0.17753 | 0.859089  | 0.996923 |
| gene1396 | gene1396 | SACOL1421 | gi 57650036 ref NC_002951.2 :1432201-1433053 | q1 | q2 | OK     | 34.3676 | 41.8882 | 0.285495  | -0.59085 | 0.554624  | 0.981439 |
| gene1397 | gene1397 | SACOL1422 | gi 57650036 ref NC_002951.2 :1433099-1434017 | q1 | q2 | OK     | 46.467  | 57.013  | 0.295083  | -0.60533 | 0.54496   | 0.979019 |
| gene1398 | gene1398 | SACOL1423 | gi 57650036 ref NC_002951.2 :1434018-1434945 | q1 | q2 | OK     | 32.1864 | 35.3577 | 0.135577  | -0.28068 | 0.778955  | 0.986963 |
| gene1399 | gene1399 | SACOL1424 | gi 57650036 ref NC_002951.2 :1435135-1436119 | q1 | q2 | OK     | 74.34   | 69.4813 | -0.097513 | 0.1897   | 0.849546  | 0.996923 |
| gene14   | gene14   | rplI      | gi 57650036 ref NC_002951.2 :18344-20755     | q1 | q2 | OK     | 375.373 | 202.626 | -0.889507 | 0.4382   | 0.661241  | 0.986963 |
| gene140  | gene140  | cap5K     | gi 57650036 ref NC_002951.2 :162409-164774   | q1 | q2 | NOTEST | 0       | 0       | 0         | 0        | 1         | 1        |
| gene1400 | gene1400 | SACOL1425 | gi 57650036 ref NC_002951.2 :1436658-1436955 | q1 | q2 | OK     | 20.798  | 21.9192 | 0.0757498 | -0.10928 | 0.912984  | 0.996932 |
| gene1401 | gene1401 | SACOL1426 | gi 57650036 ref NC_002951.2 :1437090-1437993 | q1 | q2 | OK     | 231.414 | 147.612 | -0.648665 | 0.93019  | 0.352274  | 0.914147 |
| gene1402 | gene1402 | SACOL1427 | gi 57650036 ref NC_002951.2 :1438139-1439741 | q1 | q2 | OK     | 101.975 | 43.7008 | -1.22248  | 1.95073  | 0.0510893 | 0.51709  |
| gene1403 | gene1403 | lysC      | gi 57650036 ref NC_002951.2 :1440600-1441806 | q1 | q2 | OK     | 42.1438 | 42.777  | 0.021516  | -0.04368 | 0.965162  | 0.996932 |
| gene1404 | gene1404 | asd       | gi 57650036 ref NC_002951.2 :1441869-1442859 | q1 | q2 | OK     | 105.343 | 98.4511 | -0.097617 | 0.17278  | 0.862825  | 0.996923 |
| gene1405 | gene1405 | dapA      | gi 57650036 ref NC_002951.2 :1442860-1444467 | q1 | q2 | OK     | 77.5148 | 109.313 | 0.495925  | -0.62047 | 0.53495   | 0.975497 |
| gene1406 | gene1406 | dapB      | gi 57650036 ref NC_002951.2 :1442860-1444467 | q1 | q2 | OK     | 69.0921 | 82.2385 | 0.251292  | -0.24807 | 0.80408   | 0.989625 |
| gene1407 | gene1407 | dapD      | gi 57650036 ref NC_002951.2 :1444493-1445213 | q1 | q2 | OK     | 87.098  | 126.508 | 0.538514  | -1.04474 | 0.296144  | 0.892668 |
| gene1408 | gene1408 | SACOL1433 | gi 57650036 ref NC_002951.2 :1445355-1446507 | q1 | q2 | OK     | 36.2263 | 57.1664 | 0.65813   | -1.32346 | 0.185681  | 0.819812 |
| gene1409 | gene1409 | SACOL1434 | gi 57650036 ref NC_002951.2 :1446511-1448852 | q1 | q2 | OK     | 28.7475 | 50.07   | 0.800511  | -0.66691 | 0.504831  | 0.96692  |
| gene141  | gene141  | cap5L     | gi 57650036 ref NC_002951.2 :164774-165980   | q1 | q2 | OK     | 37.3497 | 58.5438 | 0.648421  | -1.29053 | 0.196866  | 0.819847 |
| gene1410 | gene1410 | lysA      | gi 57650036 ref NC_002951.2 :1446511-1448852 | q1 | q2 | OK     | 75.4608 | 73.8573 | -0.030988 | 0.03961  | 0.9684    | 0.996932 |

|          |          |           |                                              |    |    |    |         |         |           |          |           |          |
|----------|----------|-----------|----------------------------------------------|----|----|----|---------|---------|-----------|----------|-----------|----------|
| gene1411 | gene1411 | SACOL1436 | gi 57650036 ref NC_002951.2 :1449091-1449493 | q1 | q2 | OK | 11.9187 | 27.7343 | 1.21844   | -1.94242 | 0.0520867 | 0.521074 |
| gene1412 | gene1412 | SACOL1437 | gi 57650036 ref NC_002951.2 :1449689-1449890 | q1 | q2 | OK | 5730.5  | 2164.15 | -1.40486  | 2.03323  | 0.0420291 | 0.472836 |
| gene1413 | gene1413 | SACOL1438 | gi 57650036 ref NC_002951.2 :1450060-1450369 | q1 | q2 | OK | 195.125 | 196.472 | 0.009924  | -0.02056 | 0.9836    | 0.998143 |
| gene1414 | gene1414 | SACOL1439 | gi 57650036 ref NC_002951.2 :1450531-1450801 | q1 | q2 | OK | 1067.05 | 1106.1  | 0.0518654 | -0.08455 | 0.932616  | 0.996932 |
| gene1415 | gene1415 | SACOL1440 | gi 57650036 ref NC_002951.2 :1450819-1451449 | q1 | q2 | OK | 315.594 | 345.605 | 0.131052  | -0.18068 | 0.856617  | 0.996923 |
| gene1416 | gene1416 | SACOL1441 | gi 57650036 ref NC_002951.2 :1451480-1452617 | q1 | q2 | OK | 275.311 | 274.804 | -0.002662 | 0.00296  | 0.997639  | 0.998434 |
| gene1417 | gene1417 | SACOL1442 | gi 57650036 ref NC_002951.2 :1452884-1453277 | q1 | q2 | OK | 16.5308 | 28.9201 | 0.806911  | -1.33994 | 0.180265  | 0.819812 |
| gene1418 | gene1418 | brnQ3     | gi 57650036 ref NC_002951.2 :1453629-1454973 | q1 | q2 | OK | 24.8938 | 32.5694 | 0.387729  | -0.80034 | 0.423515  | 0.93986  |
| gene1419 | gene1419 | SACOL1444 | gi 57650036 ref NC_002951.2 :1455197-1457084 | q1 | q2 | OK | 44.5466 | 37.4795 | -0.249215 | 0.46378  | 0.642807  | 0.986963 |
| gene142  | gene142  | cap5M     | gi 57650036 ref NC_002951.2 :165990-167435   | q1 | q2 | OK | 41.3292 | 69.7659 | 0.75536   | -1.00783 | 0.313536  | 0.892668 |
| gene1420 | gene1420 | SACOL1445 | gi 57650036 ref NC_002951.2 :1457097-1457889 | q1 | q2 | OK | 82.4108 | 53.6093 | -0.62035  | 1.25789  | 0.20843   | 0.828112 |
| gene1421 | gene1421 | SACOL1446 | gi 57650036 ref NC_002951.2 :1458069-1458273 | q1 | q2 | OK | 83.0529 | 93.1817 | 0.166015  | -0.24883 | 0.80349   | 0.989625 |
| gene1422 | gene1422 | SACOL1447 | gi 57650036 ref NC_002951.2 :1458301-1459111 | q1 | q2 | OK | 303.606 | 167.176 | -0.860836 | 1.19696  | 0.231321  | 0.863102 |
| gene1423 | gene1423 | sucB      | gi 57650036 ref NC_002951.2 :1459690-1460959 | q1 | q2 | OK | 627.685 | 337.344 | -0.895819 | 0.86363  | 0.387794  | 0.939006 |
| gene1424 | gene1424 | sucA      | gi 57650036 ref NC_002951.2 :1460972-1463771 | q1 | q2 | OK | 485.609 | 333.57  | -0.541806 | 0.49287  | 0.622107  | 0.986963 |
| gene1425 | gene1425 | arlS      | gi 57650036 ref NC_002951.2 :1464054-1466066 | q1 | q2 | OK | 71.5887 | 73.2643 | 0.0333781 | -0.02931 | 0.976614  | 0.998143 |
| gene1426 | gene1426 | arlR      | gi 57650036 ref NC_002951.2 :1464054-1466066 | q1 | q2 | OK | 204.444 | 187.293 | -0.126405 | 0.11695  | 0.906897  | 0.996932 |
| gene1427 | gene1427 | SACOL1452 | gi 57650036 ref NC_002951.2 :1466853-1467468 | q1 | q2 | OK | 82.9798 | 53.2263 | -0.640619 | 1.32034  | 0.186723  | 0.819812 |
| gene1428 | gene1428 | murG      | gi 57650036 ref NC_002951.2 :1467484-1468555 | q1 | q2 | OK | 82.9343 | 62.8255 | -0.400618 | 0.75808  | 0.448402  | 0.948742 |
| gene1429 | gene1429 | SACOL1454 | gi 57650036 ref NC_002951.2 :1468566-1469077 | q1 | q2 | OK | 43.2926 | 30.6121 | -0.50002  | 0.97504  | 0.329541  | 0.900771 |
| gene143  | gene143  | cap5N     | gi 57650036 ref NC_002951.2 :165990-167435   | q1 | q2 | OK | 27.0176 | 47.0628 | 0.800689  | -1.18951 | 0.234238  | 0.863102 |
| gene1430 | gene1430 | SACOL1455 | gi 57650036 ref NC_002951.2 :1469476-1470967 | q1 | q2 | OK | 60.6913 | 68.3327 | 0.171086  | -0.30044 | 0.763841  | 0.986963 |
| gene1431 | gene1431 | SACOL1456 | gi 57650036 ref NC_002951.2 :1471158-1471880 | q1 | q2 | OK | 196.412 | 135.162 | -0.539192 | 0.26047  | 0.794505  | 0.987561 |
| gene1432 | gene1432 | SACOL1457 | gi 57650036 ref NC_002951.2 :1471158-1471880 | q1 | q2 | OK | 324.726 | 221.016 | -0.555073 | 0.87967  | 0.37904   | 0.932987 |
| gene1433 | gene1433 | SACOL1459 | gi 57650036 ref NC_002951.2 :1471891-1473771 | q1 | q2 | OK | 329.193 | 226.929 | -0.536694 | 0.5119   | 0.608719  | 0.986963 |
| gene1434 | gene1434 | SACOL1460 | gi 57650036 ref NC_002951.2 :1471891-1473771 | q1 | q2 | OK | 85.4744 | 94.7619 | 0.148814  | -0.06887 | 0.945095  | 0.996932 |
| gene1435 | gene1435 | folA      | gi 57650036 ref NC_002951.2 :1473785-1474265 | q1 | q2 | OK | 239.916 | 226.395 | -0.083689 | 0.15543  | 0.876483  | 0.996932 |
| gene1436 | gene1436 | thyA      | gi 57650036 ref NC_002951.2 :1474464-1475421 | q1 | q2 | OK | 93.0286 | 101.793 | 0.129891  | -0.23652 | 0.813032  | 0.991128 |
| gene1437 | gene1437 | SACOL1464 | gi 57650036 ref NC_002951.2 :1475844-1476282 | q1 | q2 | OK | 122.146 | 103.589 | -0.237741 | 0.49228  | 0.622519  | 0.986963 |
| gene1438 | gene1438 | SACOL1465 | gi 57650036 ref NC_002951.2 :1476297-1477422 | q1 | q2 | OK | 169.196 | 164.764 | -0.038289 | 0.05154  | 0.958894  | 0.996932 |
| gene1439 | gene1439 | SACOL1466 | gi 57650036 ref NC_002951.2 :1477459-1477711 | q1 | q2 | OK | 90.266  | 83.9318 | -0.104965 | 0.18727  | 0.851449  | 0.996923 |
| gene144  | gene144  | cap5O     | gi 57650036 ref NC_002951.2 :167488-168751   | q1 | q2 | OK | 46.6055 | 70.0226 | 0.587322  | -1.1171  | 0.263951  | 0.875983 |
| gene1440 | gene1440 | SACOL1467 | gi 57650036 ref NC_002951.2 :1477722-1477917 | q1 | q2 | OK | 273.254 | 191.231 | -0.514925 | 0.90023  | 0.367998  | 0.928011 |

|          |          |           |                                              |    |    |    |         |         |            |            |           |           |
|----------|----------|-----------|----------------------------------------------|----|----|----|---------|---------|------------|------------|-----------|-----------|
| gene1441 | gene1441 | SACOL1468 | gi 57650036 ref NC_002951.2 :1478161-1478866 | q1 | q2 | OK | 41.8556 | 37.9788 | -0.140229  | 0.28813    | 0.773248  | 0.986963  |
| gene1442 | gene1442 | SACOL1469 | gi 57650036 ref NC_002951.2 :1478930-1479062 | q1 | q2 | OK | 100.534 | 362.289 | 1.84946    | -1.50214   | 0.133062  | 0.751714  |
| gene1443 | gene1443 | SACOL1471 | gi 57650036 ref NC_002951.2 :1479406-1479808 | q1 | q2 | OK | 32.2799 | 33.7635 | 0.0648259  | -0.11801   | 0.906057  | 0.996932  |
| gene1444 | gene1444 | ebh       | gi 57650036 ref NC_002951.2 :1479866-1511363 | q1 | q2 | OK | 26.6432 | 32.6425 | 0.292983   | -0.26577   | 0.790417  | 0.986986  |
| gene1445 | gene1445 | SACOL1475 | gi 57650036 ref NC_002951.2 :1511760-1513152 | q1 | q2 | OK | 49.8183 | 62.8814 | 0.335956   | -0.62894   | 0.529386  | 0.97289   |
| gene1446 | gene1446 | SACOL1476 | gi 57650036 ref NC_002951.2 :1513308-1514631 | q1 | q2 | OK | 66.6233 | 101.711 | 0.610377   | -1.01614   | 0.309561  | 0.892668  |
| gene1447 | gene1447 | ilvA1     | gi 57650036 ref NC_002951.2 :1514661-1515702 | q1 | q2 | OK | 31.027  | 51.1542 | 0.72133    | -1.47921   | 0.139085  | 0.763035  |
| gene1448 | gene1448 | ald1      | gi 57650036 ref NC_002951.2 :1515796-1516915 | q1 | q2 | OK | 30.4261 | 44.633  | 0.552801   | -1.13658   | 0.255713  | 0.875983  |
| gene1449 | gene1449 | SACOL1479 | gi 57650036 ref NC_002951.2 :1517389-1518268 | q1 | q2 | OK | 137.452 | 122.691 | -0.163898  | 0.27977    | 0.779651  | 0.986963  |
| gene145  | gene145  | cap5P     | gi 57650036 ref NC_002951.2 :168797-169973   | q1 | q2 | OK | 44.7774 | 52.3236 | 0.22469    | -0.4502    | 0.652568  | 0.986963  |
| gene1450 | gene1450 | SACOL1480 | gi 57650036 ref NC_002951.2 :1518287-1521728 | q1 | q2 | OK | 69.2105 | 77.1187 | 0.156091   | -0.17957   | 0.857489  | 0.996923  |
| gene1451 | gene1451 | SACOL1481 | gi 57650036 ref NC_002951.2 :1522031-1523372 | q1 | q2 | OK | 18.9401 | 26.4883 | 0.483912   | -1.00001   | 0.317308  | 0.892668  |
| gene1452 | gene1452 | SACOL1482 | gi 57650036 ref NC_002951.2 :1523577-1523910 | q1 | q2 | OK | 51.5221 | 45.7069 | -0.172777  | 0.31538    | 0.752473  | 0.986963  |
| gene1453 | gene1453 | SACOL1483 | gi 57650036 ref NC_002951.2 :1523993-1525139 | q1 | q2 | OK | 31.8335 | 38.1652 | 0.261712   | -0.5405    | 0.588856  | 0.985265  |
| gene1454 | gene1454 | SACOL1484 | gi 57650036 ref NC_002951.2 :1525789-1526134 | q1 | q2 | OK | 381.423 | 475.502 | 0.318058   | -0.58775   | 0.556698  | 0.981874  |
| gene1455 | gene1455 | SACOL1485 | gi 57650036 ref NC_002951.2 :1526147-1527054 | q1 | q2 | OK | 225.173 | 227.16  | 0.012672   | -0.01281   | 0.989779  | 0.998143  |
| gene1456 | gene1456 | SACOL1486 | gi 57650036 ref NC_002951.2 :1526147-1527054 | q1 | q2 | OK | 434.974 | 350.233 | -0.312613  | 0.2798     | 0.779633  | 0.986963  |
| gene1457 | gene1457 | SACOL1488 | gi 57650036 ref NC_002951.2 :1527487-1530400 | q1 | q2 | OK | 48.8389 | 0       | -1.79769e+ | -1.79769e+ | 0.49084   | 0.964002  |
| gene1458 | gene1458 | recU      | gi 57650036 ref NC_002951.2 :1527487-1530400 | q1 | q2 | OK | 237.868 | 108.042 | -1.13856   | 0.41051    | 0.681434  | 0.986963  |
| gene1459 | gene1459 | pbp2      | gi 57650036 ref NC_002951.2 :1527487-1530400 | q1 | q2 | OK | 323.804 | 152.252 | -1.08866   | 0.97327    | 0.330418  | 0.900771  |
| gene146  | gene146  | SACOL0152 | gi 57650036 ref NC_002951.2 :170037-170364   | q1 | q2 | OK | 73.9922 | 15.5613 | -2.24941   | 3.59513    | 0.0003242 | 0.0271377 |
| gene1460 | gene1460 | SACOL1491 | gi 57650036 ref NC_002951.2 :1530965-1531307 | q1 | q2 | OK | 91.6585 | 58.0648 | -0.658604  | 1.28038    | 0.200411  | 0.819847  |
| gene1461 | gene1461 | nth       | gi 57650036 ref NC_002951.2 :1531311-1532647 | q1 | q2 | OK | 153.804 | 70.0964 | -1.13368   | 0.92387    | 0.355553  | 0.914747  |
| gene1462 | gene1462 | SACOL1493 | gi 57650036 ref NC_002951.2 :1531311-1532647 | q1 | q2 | OK | 250.934 | 138.194 | -0.860613  | 0.9527     | 0.340744  | 0.905587  |
| gene1463 | gene1463 | asnC      | gi 57650036 ref NC_002951.2 :1532974-1534267 | q1 | q2 | OK | 133.924 | 66.9396 | -1.00048   | 1.5577     | 0.119304  | 0.725355  |
| gene1464 | gene1464 | SACOL1495 | gi 57650036 ref NC_002951.2 :1534588-1537282 | q1 | q2 | OK | 50.8185 | 43.4461 | -0.226126  | 0.34603    | 0.729324  | 0.986963  |
| gene1465 | gene1465 | birA      | gi 57650036 ref NC_002951.2 :1537305-1539466 | q1 | q2 | OK | 60.9082 | 80.758  | 0.40697    | -0.4437    | 0.657261  | 0.986963  |
| gene1466 | gene1466 | papS      | gi 57650036 ref NC_002951.2 :1537305-1539466 | q1 | q2 | OK | 67.76   | 41.3474 | -0.712635  | 0.77375    | 0.439079  | 0.944754  |
| gene1467 | gene1467 | SACOL1498 | gi 57650036 ref NC_002951.2 :1539470-1540625 | q1 | q2 | OK | 89.7038 | 62.4306 | -0.522916  | 0.95247    | 0.340861  | 0.905587  |
| gene1468 | gene1468 | SACOL1499 | gi 57650036 ref NC_002951.2 :1540853-1541171 | q1 | q2 | OK | 169.355 | 87.8363 | -0.947164  | 1.90071    | 0.05734   | 0.540443  |
| gene1469 | gene1469 | SACOL1500 | gi 57650036 ref NC_002951.2 :1541507-1542215 | q1 | q2 | OK | 1585.73 | 2170.55 | 0.452912   | -0.41112   | 0.680984  | 0.986963  |
| gene147  | gene147  | SACOL0153 | gi 57650036 ref NC_002951.2 :170370-170754   | q1 | q2 | OK | 55.9765 | 18.3896 | -1.60593   | 2.78871    | 0.0052919 | 0.144433  |
| gene1470 | gene1470 | SACOL1501 | gi 57650036 ref NC_002951.2 :1542259-1543412 | q1 | q2 | OK | 38.9204 | 41.4369 | 0.0903882  | -0.13295   | 0.894237  | 0.996932  |

|          |          |           |                                              |    |    |        |         |         |            |            |           |           |
|----------|----------|-----------|----------------------------------------------|----|----|--------|---------|---------|------------|------------|-----------|-----------|
| gene1471 | gene1471 | SACOL1502 | gi 57650036 ref NC_002951.2 :1542259-1543412 | q1 | q2 | OK     | 45.7521 | 34.6315 | -0.401752  | 0.57974    | 0.562088  | 0.98493   |
| gene1472 | gene1472 | SACOL1503 | gi 57650036 ref NC_002951.2 :1543425-1544670 | q1 | q2 | OK     | 56.5185 | 39.0903 | -0.531913  | 1.05412    | 0.291829  | 0.891156  |
| gene1473 | gene1473 | aroA      | gi 57650036 ref NC_002951.2 :1544676-1545975 | q1 | q2 | OK     | 72.7451 | 71.2001 | -0.03097   | 0.05532    | 0.955884  | 0.996932  |
| gene1474 | gene1474 | aroB      | gi 57650036 ref NC_002951.2 :1545984-1547049 | q1 | q2 | OK     | 42.0675 | 65.0514 | 0.628874   | -1.25837   | 0.208258  | 0.828112  |
| gene1475 | gene1475 | aroC      | gi 57650036 ref NC_002951.2 :1547074-1548241 | q1 | q2 | OK     | 52.364  | 56.4296 | 0.107877   | -0.2128    | 0.831485  | 0.994686  |
| gene1476 | gene1476 | SACOL1507 | gi 57650036 ref NC_002951.2 :1548626-1548827 | q1 | q2 | OK     | 0       | 14.3639 | 1.79769e+3 | 1.79769e+0 | 0.0633551 | 0.55727   |
| gene1477 | gene1477 | SACOL1508 | gi 57650036 ref NC_002951.2 :1548855-1548981 | q1 | q2 | NOTEST | 0       | 0       | 0          | 0          | 1         | 1         |
| gene1478 | gene1478 | ndk       | gi 57650036 ref NC_002951.2 :1549035-1549485 | q1 | q2 | OK     | 139.158 | 73.7098 | -0.916795  | 1.8782     | 0.060354  | 0.54909   |
| gene1479 | gene1479 | SACOL1510 | gi 57650036 ref NC_002951.2 :1549576-1550536 | q1 | q2 | OK     | 102.031 | 117.563 | 0.204425   | -0.3571    | 0.721021  | 0.986963  |
| gene148  | gene148  | aldA1     | gi 57650036 ref NC_002951.2 :171180-172668   | q1 | q2 | OK     | 1349.29 | 2384.58 | 0.821534   | -0.8035    | 0.421686  | 0.939652  |
| gene1480 | gene1480 | ubiE      | gi 57650036 ref NC_002951.2 :1550537-1551263 | q1 | q2 | OK     | 195.987 | 168.924 | -0.214383  | 0.35244    | 0.72451   | 0.986963  |
| gene1481 | gene1481 | SACOL1512 | gi 57650036 ref NC_002951.2 :1551265-1551838 | q1 | q2 | OK     | 64.1281 | 93.5123 | 0.544199   | -1.12406   | 0.260989  | 0.875983  |
| gene1482 | gene1482 | hup       | gi 57650036 ref NC_002951.2 :1552268-1552541 | q1 | q2 | OK     | 2748.07 | 2485.65 | -0.1448    | 0.16306    | 0.870475  | 0.996923  |
| gene1483 | gene1483 | gpsA      | gi 57650036 ref NC_002951.2 :1552711-1553710 | q1 | q2 | OK     | 160.759 | 90.2375 | -0.833097  | 1.34282    | 0.17933   | 0.819812  |
| gene1484 | gene1484 | engA      | gi 57650036 ref NC_002951.2 :1553726-1555037 | q1 | q2 | OK     | 163.905 | 107.012 | -0.615083  | 0.84267    | 0.399416  | 0.939607  |
| gene1485 | gene1485 | rpsA      | gi 57650036 ref NC_002951.2 :1555258-1556434 | q1 | q2 | OK     | 576.71  | 420.453 | -0.455903  | 0.43812    | 0.661299  | 0.986963  |
| gene1486 | gene1486 | cmk       | gi 57650036 ref NC_002951.2 :1557145-1557805 | q1 | q2 | OK     | 78.6684 | 58.4598 | -0.428338  | 0.88355    | 0.376937  | 0.932987  |
| gene1487 | gene1487 | ansA      | gi 57650036 ref NC_002951.2 :1557881-1558850 | q1 | q2 | OK     | 35.8437 | 33.301  | -0.106153  | 0.22003    | 0.82585   | 0.992769  |
| gene1488 | gene1488 | SACOL1520 | gi 57650036 ref NC_002951.2 :1558964-1559951 | q1 | q2 | OK     | 109.97  | 92.8991 | -0.243375  | 0.4314     | 0.666178  | 0.986963  |
| gene1489 | gene1489 | SACOL1521 | gi 57650036 ref NC_002951.2 :1560111-1560228 | q1 | q2 | OK     | 0       | 386.917 | 1.79769e+3 | 1.79769e+0 | 0.102747  | 0.686167  |
| gene149  | gene149  | SACOL0155 | gi 57650036 ref NC_002951.2 :173313-174273   | q1 | q2 | OK     | 61.2478 | 109.226 | 0.83459    | -1.55936   | 0.118912  | 0.725355  |
| gene1490 | gene1490 | SACOL1522 | gi 57650036 ref NC_002951.2 :1560352-1561813 | q1 | q2 | OK     | 615.192 | 700.502 | 0.187352   | -0.1703    | 0.864777  | 0.996923  |
| gene1491 | gene1491 | recQ2     | gi 57650036 ref NC_002951.2 :1561965-1564288 | q1 | q2 | OK     | 79.7165 | 99.6304 | 0.321707   | -0.36076   | 0.718276  | 0.986963  |
| gene1492 | gene1492 | SACOL1524 | gi 57650036 ref NC_002951.2 :1561965-1564288 | q1 | q2 | OK     | 54.2041 | 72.5266 | 0.420109   | -0.31811   | 0.750402  | 0.986963  |
| gene1493 | gene1493 | fer       | gi 57650036 ref NC_002951.2 :1564395-1564644 | q1 | q2 | OK     | 430.352 | 163.14  | -1.39941   | 2.79206    | 0.0052374 | 0.144433  |
| gene1494 | gene1494 | SACOL1526 | gi 57650036 ref NC_002951.2 :1564749-1565295 | q1 | q2 | OK     | 264.157 | 105.921 | -1.31841   | 2.39914    | 0.0164335 | 0.299437  |
| gene1495 | gene1495 | SACOL1528 | gi 57650036 ref NC_002951.2 :1565891-1566806 | q1 | q2 | OK     | 33.1693 | 39.0071 | 0.23389    | -0.48448   | 0.628049  | 0.986963  |
| gene1496 | gene1496 | SACOL1529 | gi 57650036 ref NC_002951.2 :1566820-1567898 | q1 | q2 | OK     | 16.7135 | 45.3957 | 1.44154    | -0.62459   | 0.53224   | 0.97289   |
| gene1497 | gene1497 | SACOL1530 | gi 57650036 ref NC_002951.2 :1566820-1567898 | q1 | q2 | OK     | 24.2659 | 36.4655 | 0.587605   | -1.17749   | 0.238999  | 0.863492  |
| gene1498 | gene1498 | SACOL1531 | gi 57650036 ref NC_002951.2 :1568015-1568933 | q1 | q2 | OK     | 24.3913 | 37.0495 | 0.603083   | -1.23878   | 0.215426  | 0.836273  |
| gene1499 | gene1499 | SACOL1532 | gi 57650036 ref NC_002951.2 :1569023-1572048 | q1 | q2 | OK     | 35.6551 | 57.9005 | 0.699467   | -0.85835   | 0.3907    | 0.939607  |
| gene15   | gene15   | dnaB      | gi 57650036 ref NC_002951.2 :20786-22187     | q1 | q2 | OK     | 175.389 | 88.5777 | -0.985545  | 1.33073    | 0.183278  | 0.819812  |
| gene150  | gene150  | SACOL0156 | gi 57650036 ref NC_002951.2 :174334-174538   | q1 | q2 | OK     | 41.5265 | 208.549 | 2.32829    | -3.37528   | 0.0007374 | 0.0420824 |

|          |          |           |                                              |    |    |        |         |         |           |          |           |          |
|----------|----------|-----------|----------------------------------------------|----|----|--------|---------|---------|-----------|----------|-----------|----------|
| gene1500 | gene1500 | SACOL1533 | gi 57650036 ref NC_002951.2 :1569023-1572048 | q1 | q2 | OK     | 40.9076 | 71.7695 | 0.811003  | -0.64446 | 0.519278  | 0.971416 |
| gene1501 | gene1501 | srrB      | gi 57650036 ref NC_002951.2 :1572352-1574810 | q1 | q2 | OK     | 76.3169 | 46.5184 | -0.714201 | 0.53941  | 0.589605  | 0.985265 |
| gene1502 | gene1502 | srrA      | gi 57650036 ref NC_002951.2 :1572352-1574810 | q1 | q2 | OK     | 372.665 | 131.683 | -1.50081  | 1.34695  | 0.177998  | 0.819812 |
| gene1503 | gene1503 | rluB      | gi 57650036 ref NC_002951.2 :1574942-1576939 | q1 | q2 | OK     | 134.743 | 92.4008 | -0.544235 | 0.52016  | 0.60295   | 0.986963 |
| gene1504 | gene1504 | scpB      | gi 57650036 ref NC_002951.2 :1574942-1576939 | q1 | q2 | OK     | 124.943 | 71.569  | -0.803866 | 0.57604  | 0.564592  | 0.985191 |
| gene1505 | gene1505 | scpA      | gi 57650036 ref NC_002951.2 :1574942-1576939 | q1 | q2 | OK     | 86.0623 | 61.1498 | -0.493033 | 0.3772   | 0.706025  | 0.986963 |
| gene1506 | gene1506 | SACOL1539 | gi 57650036 ref NC_002951.2 :1577030-1577537 | q1 | q2 | OK     | 30.1161 | 52.193  | 0.793319  | -1.55774 | 0.119294  | 0.725355 |
| gene1507 | gene1507 | xerD      | gi 57650036 ref NC_002951.2 :1577614-1578502 | q1 | q2 | OK     | 189.606 | 55.3129 | -1.77731  | 2.96019  | 0.0030745 | 0.107223 |
| gene1508 | gene1508 | SACOL1541 | gi 57650036 ref NC_002951.2 :1578550-1579000 | q1 | q2 | OK     | 247.438 | 135.052 | -0.873548 | 1.70991  | 0.0872817 | 0.638963 |
| gene1509 | gene1509 | SACOL1542 | gi 57650036 ref NC_002951.2 :1579104-1579647 | q1 | q2 | OK     | 56.5956 | 58.7233 | 0.0532433 | -0.10945 | 0.912843  | 0.996932 |
| gene151  | gene151  | SACOL0157 | gi 57650036 ref NC_002951.2 :174716-175229   | q1 | q2 | OK     | 87.4264 | 91.6805 | 0.0685459 | -0.14208 | 0.887017  | 0.996932 |
| gene1510 | gene1510 | SACOL1543 | gi 57650036 ref NC_002951.2 :1579728-1580637 | q1 | q2 | OK     | 83.752  | 104.514 | 0.319502  | -0.59727 | 0.550325  | 0.979019 |
| gene1511 | gene1511 | SACOL1544 | gi 57650036 ref NC_002951.2 :1580852-1581101 | q1 | q2 | OK     | 60.4509 | 73.8014 | 0.287885  | -0.48488 | 0.627764  | 0.986963 |
| gene1512 | gene1512 | SACOL1545 | gi 57650036 ref NC_002951.2 :1581116-1581872 | q1 | q2 | OK     | 42.1575 | 60.6661 | 0.525101  | -1.08534 | 0.277772  | 0.879877 |
| gene1513 | gene1513 | proC      | gi 57650036 ref NC_002951.2 :1582013-1582829 | q1 | q2 | OK     | 99.1908 | 63.898  | -0.634436 | 1.25068  | 0.211051  | 0.830641 |
| gene1514 | gene1514 | SACOL1548 | gi 57650036 ref NC_002951.2 :1582933-1583854 | q1 | q2 | OK     | 39.6699 | 46.5714 | 0.231399  | -0.47883 | 0.632056  | 0.986963 |
| gene1515 | gene1515 | zwf       | gi 57650036 ref NC_002951.2 :1584166-1585651 | q1 | q2 | OK     | 292.454 | 219.753 | -0.412322 | 0.42952  | 0.667545  | 0.986963 |
| gene1516 | gene1516 | SACOL1550 | gi 57650036 ref NC_002951.2 :1585853-1586747 | q1 | q2 | OK     | 177.191 | 97.7938 | -0.857489 | 1.40514  | 0.159979  | 0.802655 |
| gene1517 | gene1517 | malA      | gi 57650036 ref NC_002951.2 :1586829-1588479 | q1 | q2 | OK     | 69.7086 | 75.259  | 0.110527  | -0.17715 | 0.859392  | 0.996923 |
| gene1518 | gene1518 | malR      | gi 57650036 ref NC_002951.2 :1588494-1589514 | q1 | q2 | OK     | 31.7929 | 37.7484 | 0.247714  | -0.51327 | 0.607766  | 0.986963 |
| gene1519 | gene1519 | SACOL1553 | gi 57650036 ref NC_002951.2 :1589707-1590079 | q1 | q2 | OK     | 388.227 | 400.852 | 0.0461697 | -0.08366 | 0.933324  | 0.996932 |
| gene152  | gene152  | SACOL0158 | gi 57650036 ref NC_002951.2 :175570-178057   | q1 | q2 | OK     | 55.9511 | 65.855  | 0.235125  | -0.28477 | 0.775824  | 0.986963 |
| gene1520 | gene1520 | gnd       | gi 57650036 ref NC_002951.2 :1590297-1591704 | q1 | q2 | OK     | 450.029 | 306.774 | -0.55284  | 0.53838  | 0.590313  | 0.985265 |
| gene1521 | gene1521 | SACOL1555 | gi 57650036 ref NC_002951.2 :1591771-1592905 | q1 | q2 | OK     | 200.566 | 173.354 | -0.210355 | 0.26939  | 0.787633  | 0.986986 |
| gene1522 | gene1522 | SACOL1556 | gi 57650036 ref NC_002951.2 :1593167-1593347 | q1 | q2 | OK     | 57.9557 | 33.8387 | -0.776275 | 0.75043  | 0.452997  | 0.949479 |
| gene1523 | gene1523 | SACOL1557 | gi 57650036 ref NC_002951.2 :1593473-1594454 | q1 | q2 | OK     | 96.6859 | 83.1608 | -0.217402 | 0.40115  | 0.688312  | 0.986963 |
| gene1524 | gene1524 | SACOL1558 | gi 57650036 ref NC_002951.2 :1594467-1594905 | q1 | q2 | OK     | 132.038 | 117.055 | -0.173766 | 0.35931  | 0.719362  | 0.986963 |
| gene1525 | gene1525 | SACOL1559 | gi 57650036 ref NC_002951.2 :1594977-1595076 | q1 | q2 | NOTEST | 0       | 0       | 0         | 0        | 1         | 1        |
| gene1526 | gene1526 | SACOL1560 | gi 57650036 ref NC_002951.2 :1595255-1596530 | q1 | q2 | OK     | 201.333 | 101.459 | -0.988694 | 1.32025  | 0.186751  | 0.819812 |
| gene1527 | gene1527 | SACOL1561 | gi 57650036 ref NC_002951.2 :1596542-1598518 | q1 | q2 | OK     | 139.175 | 69.6464 | -0.998777 | 0.81775  | 0.413501  | 0.939652 |
| gene1528 | gene1528 | SACOL1562 | gi 57650036 ref NC_002951.2 :1596542-1598518 | q1 | q2 | OK     | 191.116 | 86.9887 | -1.13555  | 1.07735  | 0.281323  | 0.880646 |
| gene1529 | gene1529 | lpdA      | gi 57650036 ref NC_002951.2 :1598533-1599955 | q1 | q2 | OK     | 193.855 | 104.898 | -0.885999 | 1.13069  | 0.258184  | 0.875983 |
| gene153  | gene153  | SACOL0159 | gi 57650036 ref NC_002951.2 :175570-178057   | q1 | q2 | OK     | 64.5463 | 72.8216 | 0.174032  | -0.13747 | 0.890661  | 0.996932 |

|          |          |           |                                              |    |    |    |         |         |            |           |           |          |
|----------|----------|-----------|----------------------------------------------|----|----|----|---------|---------|------------|-----------|-----------|----------|
| gene1530 | gene1530 | recN      | gi 57650036 ref NC_002951.2 :1600105-1601785 | q1 | q2 | OK | 212.089 | 120.74  | -0.812765  | 0.93157   | 0.35156   | 0.914147 |
| gene1531 | gene1531 | argR      | gi 57650036 ref NC_002951.2 :1601800-1602253 | q1 | q2 | OK | 63.5477 | 89.0356 | 0.486544   | -0.99759  | 0.318478  | 0.892668 |
| gene1532 | gene1532 | ispA      | gi 57650036 ref NC_002951.2 :1602684-1605104 | q1 | q2 | OK | 94.5467 | 138.239 | 0.548069   | -0.44948  | 0.653084  | 0.986963 |
| gene1533 | gene1533 | xseB      | gi 57650036 ref NC_002951.2 :1602684-1605104 | q1 | q2 | OK | 42.1611 | 81.7842 | 0.95591    | -0.16049  | 0.872495  | 0.996923 |
| gene1534 | gene1534 | xseA      | gi 57650036 ref NC_002951.2 :1602684-1605104 | q1 | q2 | OK | 70.4165 | 112.753 | 0.679183   | -0.63345  | 0.526442  | 0.97289  |
| gene1535 | gene1535 | nusB      | gi 57650036 ref NC_002951.2 :1605120-1605510 | q1 | q2 | OK | 185.357 | 272.972 | 0.558445   | -1.11569  | 0.264554  | 0.875983 |
| gene1536 | gene1536 | SACOL1570 | gi 57650036 ref NC_002951.2 :1605569-1605932 | q1 | q2 | OK | 201.04  | 270.532 | 0.428319   | -0.86805  | 0.385369  | 0.938503 |
| gene1537 | gene1537 | accC      | gi 57650036 ref NC_002951.2 :1605946-1607766 | q1 | q2 | OK | 129.444 | 94.0037 | -0.461539  | 0.56893   | 0.569405  | 0.985265 |
| gene1538 | gene1538 | accB      | gi 57650036 ref NC_002951.2 :1605946-1607766 | q1 | q2 | OK | 113.34  | 60.4255 | -0.907432  | 0.48772   | 0.625751  | 0.986963 |
| gene1539 | gene1539 | SACOL1573 | gi 57650036 ref NC_002951.2 :1608120-1609141 | q1 | q2 | OK | 78.5746 | 58.0538 | -0.436673  | 0.84815   | 0.396357  | 0.939607 |
| gene154  | gene154  | SACOL0160 | gi 57650036 ref NC_002951.2 :178069-179101   | q1 | q2 | OK | 41.265  | 43.1321 | 0.0638458  | -0.13157  | 0.895326  | 0.996932 |
| gene1540 | gene1540 | SACOL1574 | gi 57650036 ref NC_002951.2 :1609249-1609591 | q1 | q2 | OK | 2.67616 | 0       | -1.79769e+ | -1.79769e | 0.051424  | 0.51709  |
| gene1541 | gene1541 | SACOL1575 | gi 57650036 ref NC_002951.2 :1609646-1610237 | q1 | q2 | OK | 40.288  | 32.3878 | -0.314901  | 0.62909   | 0.529288  | 0.97289  |
| gene1542 | gene1542 | SACOL1576 | gi 57650036 ref NC_002951.2 :1610243-1613127 | q1 | q2 | OK | 77.4323 | 79.1059 | 0.030849   | -0.02833  | 0.977397  | 0.998143 |
| gene1543 | gene1543 | SACOL1577 | gi 57650036 ref NC_002951.2 :1610243-1613127 | q1 | q2 | OK | 37.8698 | 61.3874 | 0.696893   | -0.70606  | 0.480154  | 0.960691 |
| gene1544 | gene1544 | SACOL1578 | gi 57650036 ref NC_002951.2 :1613131-1614490 | q1 | q2 | OK | 20.4023 | 29.7931 | 0.546244   | -1.12853  | 0.259096  | 0.875983 |
| gene1545 | gene1545 | SACOL1579 | gi 57650036 ref NC_002951.2 :1614543-1617039 | q1 | q2 | OK | 28.6147 | 40.3044 | 0.494178   | -0.88172  | 0.37793   | 0.932987 |
| gene1546 | gene1546 | SACOL1580 | gi 57650036 ref NC_002951.2 :1617073-1617457 | q1 | q2 | OK | 40.9059 | 70.9315 | 0.794119   | -1.52985  | 0.126055  | 0.732386 |
| gene1547 | gene1547 | SACOL1581 | gi 57650036 ref NC_002951.2 :1617468-1617729 | q1 | q2 | OK | 163.211 | 199.755 | 0.291492   | -0.58463  | 0.558796  | 0.983432 |
| gene1548 | gene1548 | SACOL1582 | gi 57650036 ref NC_002951.2 :1617733-1618789 | q1 | q2 | OK | 21.1169 | 34.6781 | 0.715627   | -1.47124  | 0.141227  | 0.770917 |
| gene1549 | gene1549 | SACOL1583 | gi 57650036 ref NC_002951.2 :1618849-1619941 | q1 | q2 | OK | 38.7071 | 54.8299 | 0.502367   | -1.01918  | 0.308119  | 0.892668 |
| gene155  | gene155  | SACOL0161 | gi 57650036 ref NC_002951.2 :179317-179677   | q1 | q2 | OK | 1268.83 | 538.268 | -1.2371    | 1.65491   | 0.097942  | 0.673787 |
| gene1550 | gene1550 | SACOL1584 | gi 57650036 ref NC_002951.2 :1620115-1620418 | q1 | q2 | OK | 30.2333 | 33.9987 | 0.169343   | -0.27351  | 0.784462  | 0.986986 |
| gene1551 | gene1551 | SACOL1585 | gi 57650036 ref NC_002951.2 :1620431-1620752 | q1 | q2 | OK | 26.6533 | 41.0605 | 0.623437   | -1.04085  | 0.297944  | 0.892668 |
| gene1552 | gene1552 | SACOL1586 | gi 57650036 ref NC_002951.2 :1620902-1621187 | q1 | q2 | OK | 21.9474 | 25.7326 | 0.229549   | -0.33145  | 0.740307  | 0.986963 |
| gene1553 | gene1553 | efp       | gi 57650036 ref NC_002951.2 :1621581-1622139 | q1 | q2 | OK | 167.993 | 187.804 | 0.160829   | -0.30218  | 0.762517  | 0.986963 |
| gene1554 | gene1554 | SACOL1588 | gi 57650036 ref NC_002951.2 :1622164-1623226 | q1 | q2 | OK | 88.3019 | 141.075 | 0.675941   | -1.10209  | 0.270424  | 0.875983 |
| gene1555 | gene1555 | SACOL1589 | gi 57650036 ref NC_002951.2 :1623330-1623912 | q1 | q2 | OK | 89.0539 | 55.9689 | -0.670054  | 1.38037   | 0.167472  | 0.814226 |
| gene1556 | gene1556 | SACOL1590 | gi 57650036 ref NC_002951.2 :1623925-1624144 | q1 | q2 | OK | 64.4473 | 38.2059 | -0.754327  | 1.03747   | 0.299519  | 0.892668 |
| gene1557 | gene1557 | SACOL1591 | gi 57650036 ref NC_002951.2 :1624207-1625038 | q1 | q2 | OK | 165.588 | 114.64  | -0.530489  | 0.89976   | 0.368248  | 0.928011 |
| gene1558 | gene1558 | SACOL1592 | gi 57650036 ref NC_002951.2 :1625195-1625582 | q1 | q2 | OK | 216.044 | 118.427 | -0.867332  | 1.76923   | 0.0768555 | 0.618539 |
| gene1559 | gene1559 | SACOL1593 | gi 57650036 ref NC_002951.2 :1625946-1628758 | q1 | q2 | OK | 374.584 | 58.5241 | -2.67819   | 2.14567   | 0.031899  | 0.419363 |
| gene156  | gene156  | SACOL0162 | gi 57650036 ref NC_002951.2 :179849-180875   | q1 | q2 | OK | 44.7919 | 38.4208 | -0.221352  | 0.4563    | 0.648175  | 0.986963 |



|          |          |           |                                              |    |    |    |         |         |           |          |           |          |
|----------|----------|-----------|----------------------------------------------|----|----|----|---------|---------|-----------|----------|-----------|----------|
| gene1560 | gene1560 | SACOL1594 | gi 57650036 ref NC_002951.2 :1625946-1628758 | q1 | q2 | OK | 317.594 | 59.1781 | -2.42405  | 1.74393  | 0.0811721 | 0.629918 |
| gene1561 | gene1561 | gcvT      | gi 57650036 ref NC_002951.2 :1628777-1629869 | q1 | q2 | OK | 152.072 | 49.8851 | -1.60808  | 2.64253  | 0.0082288 | 0.198678 |
| gene1562 | gene1562 | aroK      | gi 57650036 ref NC_002951.2 :1630027-1630552 | q1 | q2 | OK | 158.883 | 90.0121 | -0.819769 | 1.64908  | 0.0991303 | 0.680099 |
| gene1563 | gene1563 | SACOL1597 | gi 57650036 ref NC_002951.2 :1630784-1631282 | q1 | q2 | OK | 9.49314 | 19.7116 | 1.05409   | -1.71259 | 0.0867876 | 0.638501 |
| gene1564 | gene1564 | SACOL1598 | gi 57650036 ref NC_002951.2 :1631485-1632221 | q1 | q2 | OK | 12.9009 | 18.5115 | 0.520955  | -0.67835 | 0.497549  | 0.964002 |
| gene1565 | gene1565 | comGC     | gi 57650036 ref NC_002951.2 :1631485-1632221 | q1 | q2 | OK | 27.5216 | 35.7343 | 0.376747  | -0.49611 | 0.619814  | 0.986963 |
| gene1566 | gene1566 | SACOL1600 | gi 57650036 ref NC_002951.2 :1632234-1634251 | q1 | q2 | OK | 16.9201 | 31.2639 | 0.885756  | -1.26827 | 0.2047    | 0.822403 |
| gene1567 | gene1567 | SACOL1601 | gi 57650036 ref NC_002951.2 :1632234-1634251 | q1 | q2 | OK | 21.3748 | 30.879  | 0.530716  | -0.75684 | 0.449144  | 0.948742 |
| gene1568 | gene1568 | SACOL1602 | gi 57650036 ref NC_002951.2 :1634302-1637882 | q1 | q2 | OK | 98.1134 | 66.8243 | -0.554077 | 0.17852  | 0.858315  | 0.996923 |
| gene1569 | gene1569 | SACOL1603 | gi 57650036 ref NC_002951.2 :1634302-1637882 | q1 | q2 | OK | 229.342 | 148.87  | -0.623444 | 0.17769  | 0.858967  | 0.996923 |
| gene157  | gene157  | SACOL0163 | gi 57650036 ref NC_002951.2 :181260-182511   | q1 | q2 | OK | 75.0112 | 47.5362 | -0.65808  | 1.23674  | 0.216182  | 0.836415 |
| gene1570 | gene1570 | glk       | gi 57650036 ref NC_002951.2 :1634302-1637882 | q1 | q2 | OK | 178.383 | 155.709 | -0.196131 | 0.1216   | 0.903212  | 0.996932 |
| gene1571 | gene1571 | SACOL1605 | gi 57650036 ref NC_002951.2 :1634302-1637882 | q1 | q2 | OK | 91.9514 | 75.4328 | -0.285681 | 0.02574  | 0.979468  | 0.998143 |
| gene1572 | gene1572 | SACOL1606 | gi 57650036 ref NC_002951.2 :1634302-1637882 | q1 | q2 | OK | 140.43  | 109.613 | -0.357428 | 0.24151  | 0.809158  | 0.991128 |
| gene1573 | gene1573 | SACOL1607 | gi 57650036 ref NC_002951.2 :1637893-1638433 | q1 | q2 | OK | 137.178 | 66.9884 | -1.03406  | 2.09723  | 0.0359735 | 0.441533 |
| gene1574 | gene1574 | rpmG      | gi 57650036 ref NC_002951.2 :1638641-1638791 | q1 | q2 | OK | 751.47  | 414.836 | -0.857172 | 1.32108  | 0.186474  | 0.819812 |
| gene1575 | gene1575 | pbp3      | gi 57650036 ref NC_002951.2 :1638903-1640979 | q1 | q2 | OK | 222.358 | 166.316 | -0.418958 | 0.4263   | 0.669889  | 0.986963 |
| gene1576 | gene1576 | sodA2     | gi 57650036 ref NC_002951.2 :1641099-1641699 | q1 | q2 | OK | 283.905 | 217.706 | -0.383032 | 0.6136   | 0.539482  | 0.978583 |
| gene1577 | gene1577 | SACOL1611 | gi 57650036 ref NC_002951.2 :1641974-1643235 | q1 | q2 | OK | 40.6408 | 26.0626 | -0.640946 | 0.50901  | 0.610745  | 0.986963 |
| gene1578 | gene1578 | SACOL1612 | gi 57650036 ref NC_002951.2 :1641974-1643235 | q1 | q2 | OK | 65.0524 | 53.5732 | -0.28009  | 0.51323  | 0.607789  | 0.986963 |
| gene1579 | gene1579 | SACOL1613 | gi 57650036 ref NC_002951.2 :1643276-1644062 | q1 | q2 | OK | 55.6624 | 54.8    | -0.022527 | 0.04657  | 0.962858  | 0.996932 |
| gene158  | gene158  | SACOL0164 | gi 57650036 ref NC_002951.2 :182957-190133   | q1 | q2 | OK | 108.186 | 53.9535 | -1.00373  | 0.96096  | 0.336571  | 0.905587 |
| gene1580 | gene1580 | nfo       | gi 57650036 ref NC_002951.2 :1644187-1645078 | q1 | q2 | OK | 185.294 | 82.1512 | -1.17346  | 1.93001  | 0.0536053 | 0.529932 |
| gene1581 | gene1581 | SACOL1615 | gi 57650036 ref NC_002951.2 :1645087-1646434 | q1 | q2 | OK | 130.531 | 61.6769 | -1.08159  | 1.67973  | 0.0930096 | 0.659737 |
| gene1582 | gene1582 | SACOL1616 | gi 57650036 ref NC_002951.2 :1646547-1647648 | q1 | q2 | OK | 118.101 | 96.4882 | -0.291597 | 0.48139  | 0.63024   | 0.986963 |
| gene1583 | gene1583 | SACOL1617 | gi 57650036 ref NC_002951.2 :1647650-1648328 | q1 | q2 | OK | 104.512 | 106.263 | 0.0239677 | -0.04743 | 0.96217   | 0.996932 |
| gene1584 | gene1584 | rpoD      | gi 57650036 ref NC_002951.2 :1648458-1649565 | q1 | q2 | OK | 351.42  | 194.871 | -0.850672 | 0.97118  | 0.331457  | 0.900927 |
| gene1585 | gene1585 | dnaG      | gi 57650036 ref NC_002951.2 :1649788-1651588 | q1 | q2 | OK | 309.821 | 115.707 | -1.42096  | 1.52876  | 0.126324  | 0.732386 |
| gene1586 | gene1586 | SACOL1620 | gi 57650036 ref NC_002951.2 :1651648-1652467 | q1 | q2 | OK | 144.097 | 110.775 | -0.379407 | 0.6719   | 0.501647  | 0.965124 |
| gene1587 | gene1587 | SACOL1621 | gi 57650036 ref NC_002951.2 :1652477-1653017 | q1 | q2 | OK | 63.9124 | 41.0813 | -0.637615 | 1.29438  | 0.195533  | 0.819847 |
| gene1588 | gene1588 | glyS      | gi 57650036 ref NC_002951.2 :1653435-1654827 | q1 | q2 | OK | 127.051 | 375.867 | 1.56481   | -1.74862 | 0.080356  | 0.628579 |
| gene1589 | gene1589 | SACOL1623 | gi 57650036 ref NC_002951.2 :1654976-1655729 | q1 | q2 | OK | 181.971 | 99.2459 | -0.874632 | 1.5356   | 0.124636  | 0.732386 |
| gene159  | gene159  | SACOL0165 | gi 57650036 ref NC_002951.2 :190145-190790   | q1 | q2 | OK | 110.061 | 39.1888 | -1.48979  | 2.99119  | 0.0027789 | 0.101128 |

|          |          |           |                                              |    |    |        |         |         |           |          |           |          |
|----------|----------|-----------|----------------------------------------------|----|----|--------|---------|---------|-----------|----------|-----------|----------|
| gene1590 | gene1590 | era       | gi 57650036 ref NC_002951.2 :1655750-1656650 | q1 | q2 | OK     | 208.004 | 102.691 | -1.0183   | 1.5825   | 0.113537  | 0.720767 |
| gene1591 | gene1591 | cdd       | gi 57650036 ref NC_002951.2 :1656650-1657055 | q1 | q2 | OK     | 137.283 | 88.0289 | -0.641101 | 1.31925  | 0.187086  | 0.819847 |
| gene1592 | gene1592 | dgkA      | gi 57650036 ref NC_002951.2 :1657065-1657410 | q1 | q2 | OK     | 96.671  | 74.0936 | -0.383735 | 0.76226  | 0.445908  | 0.948742 |
| gene1593 | gene1593 | SACOL1627 | gi 57650036 ref NC_002951.2 :1657412-1657880 | q1 | q2 | OK     | 422.499 | 205.789 | -1.03778  | 1.73416  | 0.0828892 | 0.632629 |
| gene1594 | gene1594 | SACOL1628 | gi 57650036 ref NC_002951.2 :1657880-1658801 | q1 | q2 | OK     | 339.501 | 189.51  | -0.841142 | 1.04919  | 0.294092  | 0.891156 |
| gene1595 | gene1595 | SACOL1629 | gi 57650036 ref NC_002951.2 :1659131-1659830 | q1 | q2 | OK     | 675.748 | 670.302 | -0.011672 | 0.01196  | 0.990458  | 0.998143 |
| gene1596 | gene1596 | SACOL1630 | gi 57650036 ref NC_002951.2 :1659846-1660836 | q1 | q2 | OK     | 541.785 | 538.451 | -0.008906 | 0.0087   | 0.993055  | 0.998143 |
| gene1597 | gene1597 | SACOL1631 | gi 57650036 ref NC_002951.2 :1660853-1661561 | q1 | q2 | OK     | 412.578 | 487.128 | 0.239634  | -0.27569 | 0.78279   | 0.986963 |
| gene1598 | gene1598 | rpsU      | gi 57650036 ref NC_002951.2 :1661780-1661957 | q1 | q2 | OK     | 1532.59 | 813.493 | -0.913767 | 1.83159  | 0.0670123 | 0.57234  |
| gene1599 | gene1599 | SACOL1633 | gi 57650036 ref NC_002951.2 :1662249-1663596 | q1 | q2 | OK     | 106.486 | 63.9486 | -0.73568  | 1.20449  | 0.2284    | 0.858851 |
| gene16   | gene16   | SACOL0017 | gi 57650036 ref NC_002951.2 :22262-22355     | q1 | q2 | NOTEST | 0       | 0       | 0         | 0        | 1         | 1        |
| gene160  | gene160  | SACOL0166 | gi 57650036 ref NC_002951.2 :191117-191612   | q1 | q2 | OK     | 108.225 | 85.1082 | -0.346663 | 0.71685  | 0.473469  | 0.95963  |
| gene1600 | gene1600 | SACOL1634 | gi 57650036 ref NC_002951.2 :1663602-1664355 | q1 | q2 | OK     | 77.224  | 58.6664 | -0.396515 | 0.81093  | 0.417409  | 0.939652 |
| gene1601 | gene1601 | prmA      | gi 57650036 ref NC_002951.2 :1664356-1665295 | q1 | q2 | OK     | 138.902 | 79.5604 | -0.803941 | 1.40226  | 0.160837  | 0.802655 |
| gene1602 | gene1602 | dnaJ      | gi 57650036 ref NC_002951.2 :1665298-1666438 | q1 | q2 | OK     | 155.389 | 114.108 | -0.445479 | 0.65484  | 0.512569  | 0.971029 |
| gene1603 | gene1603 | dnaK      | gi 57650036 ref NC_002951.2 :1666573-1668406 | q1 | q2 | OK     | 496.191 | 268.857 | -0.884054 | 0.83156  | 0.405659  | 0.939607 |
| gene1604 | gene1604 | grpE      | gi 57650036 ref NC_002951.2 :1668474-1669101 | q1 | q2 | OK     | 258.574 | 267.576 | 0.04937   | -0.07558 | 0.939753  | 0.996932 |
| gene1605 | gene1605 | hrcA      | gi 57650036 ref NC_002951.2 :1669132-1670110 | q1 | q2 | OK     | 74.7486 | 90.2921 | 0.272554  | -0.51507 | 0.606507  | 0.986963 |
| gene1606 | gene1606 | SACOL1640 | gi 57650036 ref NC_002951.2 :1670209-1671367 | q1 | q2 | OK     | 32.85   | 37.8313 | 0.203684  | -0.42039 | 0.674197  | 0.986963 |
| gene1607 | gene1607 | lepA      | gi 57650036 ref NC_002951.2 :1671896-1673720 | q1 | q2 | OK     | 71.25   | 50.8433 | -0.486832 | 0.79785  | 0.424956  | 0.940178 |
| gene1608 | gene1608 | rpsT      | gi 57650036 ref NC_002951.2 :1674065-1674317 | q1 | q2 | OK     | 424.944 | 149.212 | -1.50991  | 3.00071  | 0.0026935 | 0.101128 |
| gene1609 | gene1609 | hoIA      | gi 57650036 ref NC_002951.2 :1674361-1675336 | q1 | q2 | OK     | 36.2941 | 36.7209 | 0.0168692 | -0.03498 | 0.972099  | 0.99793  |
| gene161  | gene161  | argB      | gi 57650036 ref NC_002951.2 :191866-192631   | q1 | q2 | OK     | 15.5217 | 19.0768 | 0.297528  | -0.56744 | 0.570416  | 0.985265 |
| gene1610 | gene1610 | SACOL1644 | gi 57650036 ref NC_002951.2 :1675392-1677540 | q1 | q2 | OK     | 36.9768 | 55.3142 | 0.581029  | -0.98932 | 0.322506  | 0.89482  |
| gene1611 | gene1611 | SACOL1645 | gi 57650036 ref NC_002951.2 :1677598-1678030 | q1 | q2 | OK     | 117.017 | 84.3346 | -0.472522 | 0.97507  | 0.329527  | 0.900771 |
| gene1612 | gene1612 | comEA     | gi 57650036 ref NC_002951.2 :1678151-1678838 | q1 | q2 | OK     | 35.0505 | 38.5475 | 0.137206  | -0.27987 | 0.779579  | 0.986963 |
| gene1613 | gene1613 | SACOL1647 | gi 57650036 ref NC_002951.2 :1678877-1679594 | q1 | q2 | OK     | 67.1056 | 64.104  | -0.066021 | 0.13616  | 0.891698  | 0.996932 |
| gene1614 | gene1614 | SACOL1648 | gi 57650036 ref NC_002951.2 :1679596-1679950 | q1 | q2 | OK     | 273.39  | 234.555 | -0.22103  | 0.44628  | 0.655393  | 0.986963 |
| gene1615 | gene1615 | SACOL1649 | gi 57650036 ref NC_002951.2 :1679950-1681094 | q1 | q2 | OK     | 150.132 | 97.9548 | -0.616048 | 0.73791  | 0.460572  | 0.950591 |
| gene1616 | gene1616 | nadD      | gi 57650036 ref NC_002951.2 :1679950-1681094 | q1 | q2 | OK     | 152.868 | 80.2377 | -0.929931 | 1.05665  | 0.290671  | 0.891156 |
| gene1617 | gene1617 | SACOL1651 | gi 57650036 ref NC_002951.2 :1681096-1681387 | q1 | q2 | OK     | 28.4599 | 30.4153 | 0.0958679 | -0.14821 | 0.882174  | 0.996932 |
| gene1618 | gene1618 | aroE      | gi 57650036 ref NC_002951.2 :1681390-1682197 | q1 | q2 | OK     | 82.4662 | 44.06   | -0.904331 | 1.83167  | 0.0670009 | 0.57234  |
| gene1619 | gene1619 | SACOL1653 | gi 57650036 ref NC_002951.2 :1682210-1683311 | q1 | q2 | OK     | 88.4517 | 62.3573 | -0.504331 | 0.9364   | 0.349065  | 0.913467 |

|          |          |           |                                              |    |    |    |         |         |           |          |           |           |
|----------|----------|-----------|----------------------------------------------|----|----|----|---------|---------|-----------|----------|-----------|-----------|
| gene162  | gene162  | argJ      | gi 57650036 ref NC_002951.2 :192646-193888   | q1 | q2 | OK | 19.1795 | 25.4682 | 0.409128  | -0.84385 | 0.398754  | 0.939607  |
| gene1620 | gene1620 | SACOL1654 | gi 57650036 ref NC_002951.2 :1683311-1683839 | q1 | q2 | OK | 129.201 | 38.6792 | -1.73998  | 3.47234  | 0.0005159 | 0.0332187 |
| gene1621 | gene1621 | mtn       | gi 57650036 ref NC_002951.2 :1683858-1684545 | q1 | q2 | OK | 95.1051 | 35.9253 | -1.40452  | 2.83335  | 0.0046063 | 0.137671  |
| gene1622 | gene1622 | SACOL1656 | gi 57650036 ref NC_002951.2 :1684858-1685128 | q1 | q2 | OK | 61.8245 | 25.5139 | -1.27689  | 1.97059  | 0.0487708 | 0.499851  |
| gene1623 | gene1623 | SACOL1657 | gi 57650036 ref NC_002951.2 :1685329-1686034 | q1 | q2 | OK | 33.6571 | 40.0043 | 0.249244  | -0.50941 | 0.610463  | 0.986963  |
| gene1624 | gene1624 | SACOL1658 | gi 57650036 ref NC_002951.2 :1686495-1687716 | q1 | q2 | OK | 100.12  | 36.1727 | -1.46876  | 2.6358   | 0.0083938 | 0.200732  |
| gene1625 | gene1625 | SACOL1659 | gi 57650036 ref NC_002951.2 :1688004-1689234 | q1 | q2 | OK | 160.293 | 56.4446 | -1.50581  | 2.30778  | 0.0210113 | 0.340384  |
| gene1626 | gene1626 | SACOL1660 | gi 57650036 ref NC_002951.2 :1689246-1691360 | q1 | q2 | OK | 124.548 | 62.1446 | -1.003    | 0.66227  | 0.5078    | 0.970385  |
| gene1627 | gene1627 | SACOL1661 | gi 57650036 ref NC_002951.2 :1689246-1691360 | q1 | q2 | OK | 153.311 | 83.7692 | -0.87197  | 0.93115  | 0.351774  | 0.914147  |
| gene1628 | gene1628 | SACOL1662 | gi 57650036 ref NC_002951.2 :1691373-1691823 | q1 | q2 | OK | 58.8745 | 34.6288 | -0.765672 | 1.49129  | 0.135884  | 0.754931  |
| gene1629 | gene1629 | SACOL1663 | gi 57650036 ref NC_002951.2 :1691824-1693559 | q1 | q2 | OK | 101.067 | 58.2756 | -0.794351 | 1.08468  | 0.278062  | 0.879877  |
| gene163  | gene163  | argC      | gi 57650036 ref NC_002951.2 :193899-194931   | q1 | q2 | OK | 32.9584 | 34.568  | 0.0687916 | -0.14263 | 0.886581  | 0.996932  |
| gene1630 | gene1630 | SACOL1664 | gi 57650036 ref NC_002951.2 :1691824-1693559 | q1 | q2 | OK | 66.1965 | 43.8175 | -0.595248 | 0.5533   | 0.580055  | 0.985265  |
| gene1631 | gene1631 | greA      | gi 57650036 ref NC_002951.2 :1693884-1694361 | q1 | q2 | OK | 186.668 | 139.288 | -0.422398 | 0.84259  | 0.399459  | 0.939607  |
| gene1632 | gene1632 | udk       | gi 57650036 ref NC_002951.2 :1694388-1696280 | q1 | q2 | OK | 154.287 | 94.3931 | -0.708865 | 0.57604  | 0.564591  | 0.985191  |
| gene1633 | gene1633 | SACOL1667 | gi 57650036 ref NC_002951.2 :1694388-1696280 | q1 | q2 | OK | 119.819 | 65.2532 | -0.876741 | 0.95848  | 0.337819  | 0.905587  |
| gene1634 | gene1634 | SACOL1668 | gi 57650036 ref NC_002951.2 :1696291-1697215 | q1 | q2 | OK | 129.104 | 81.3486 | -0.666344 | 1.1887   | 0.234559  | 0.863102  |
| gene1635 | gene1635 | SACOL1669 | gi 57650036 ref NC_002951.2 :1697217-1697856 | q1 | q2 | OK | 62.9922 | 39.9939 | -0.655395 | 1.34624  | 0.178225  | 0.819812  |
| gene1636 | gene1636 | SACOL1670 | gi 57650036 ref NC_002951.2 :1698140-1698449 | q1 | q2 | OK | 313.358 | 428.476 | 0.451404  | -0.9026  | 0.366738  | 0.928011  |
| gene1637 | gene1637 | SACOL1671 | gi 57650036 ref NC_002951.2 :1698463-1698892 | q1 | q2 | OK | 548.678 | 747.852 | 0.446793  | -0.59511 | 0.551772  | 0.980537  |
| gene1638 | gene1638 | SACOL1672 | gi 57650036 ref NC_002951.2 :1698895-1699156 | q1 | q2 | OK | 995.589 | 1178.56 | 0.243398  | -0.41371 | 0.679086  | 0.986963  |
| gene1639 | gene1639 | alaS      | gi 57650036 ref NC_002951.2 :1699218-1701849 | q1 | q2 | OK | 74.657  | 68.6017 | -0.122033 | 0.15735  | 0.874967  | 0.996932  |
| gene164  | gene164  | rocD1     | gi 57650036 ref NC_002951.2 :194969-196154   | q1 | q2 | OK | 52.9154 | 56.4718 | 0.0938421 | -0.18436 | 0.853728  | 0.996923  |
| gene1640 | gene1640 | SACOL1674 | gi 57650036 ref NC_002951.2 :1702191-1704669 | q1 | q2 | OK | 53.9708 | 55.313  | 0.0354381 | -0.05285 | 0.957852  | 0.996932  |
| gene1641 | gene1641 | SACOL1675 | gi 57650036 ref NC_002951.2 :1704670-1705339 | q1 | q2 | OK | 36.3129 | 42.1497 | 0.215041  | -0.43938 | 0.660389  | 0.986963  |
| gene1642 | gene1642 | mnmA      | gi 57650036 ref NC_002951.2 :1705800-1706919 | q1 | q2 | OK | 195.214 | 121.328 | -0.68614  | 0.95233  | 0.340928  | 0.905587  |
| gene1643 | gene1643 | SACOL1677 | gi 57650036 ref NC_002951.2 :1706919-1708062 | q1 | q2 | OK | 170.698 | 91.1666 | -0.904865 | 1.34429  | 0.178853  | 0.819812  |
| gene1644 | gene1644 | SACOL1678 | gi 57650036 ref NC_002951.2 :1708373-1709387 | q1 | q2 | OK | 168.577 | 206.649 | 0.293775  | -0.39737 | 0.691092  | 0.986963  |
| gene1645 | gene1645 | SACOL1679 | gi 57650036 ref NC_002951.2 :1709623-1709770 | q1 | q2 | OK | 801.742 | 2750.3  | 1.77838   | -3.27863 | 0.0010431 | 0.0545675 |
| gene1646 | gene1646 | SACOL1680 | gi 57650036 ref NC_002951.2 :1709809-1709992 | q1 | q2 | OK | 73.0734 | 279.704 | 1.93648   | -2.78906 | 0.0052862 | 0.144433  |
| gene1647 | gene1647 | SACOL1681 | gi 57650036 ref NC_002951.2 :1710091-1710514 | q1 | q2 | OK | 335.716 | 373.079 | 0.152241  | -0.26452 | 0.791382  | 0.986986  |
| gene1648 | gene1648 | SACOL1682 | gi 57650036 ref NC_002951.2 :1710598-1711873 | q1 | q2 | OK | 139.972 | 97.9475 | -0.515053 | 0.75511  | 0.450182  | 0.948742  |
| gene1649 | gene1649 | SACOL1683 | gi 57650036 ref NC_002951.2 :1712033-1712807 | q1 | q2 | OK | 94.9938 | 51.6627 | -0.878709 | 1.76489  | 0.0775817 | 0.620406  |

|          |          |           |                                              |    |    |    |         |         |           |          |           |           |
|----------|----------|-----------|----------------------------------------------|----|----|----|---------|---------|-----------|----------|-----------|-----------|
| gene165  | gene165  | brnQ1     | gi 57650036 ref NC_002951.2 :196406-197762   | q1 | q2 | OK | 48.6998 | 33.3634 | -0.545648 | 1.0897   | 0.275845  | 0.879877  |
| gene1650 | gene1650 | aspS      | gi 57650036 ref NC_002951.2 :1713267-1715034 | q1 | q2 | OK | 58.7441 | 48.3318 | -0.28147  | 0.49284  | 0.622127  | 0.986963  |
| gene1651 | gene1651 | hisS      | gi 57650036 ref NC_002951.2 :1715049-1716312 | q1 | q2 | OK | 41.6384 | 45.5392 | 0.129193  | -0.25978 | 0.795031  | 0.987561  |
| gene1652 | gene1652 | SACOL1687 | gi 57650036 ref NC_002951.2 :1716772-1718097 | q1 | q2 | OK | 93.3868 | 123.222 | 0.399972  | -0.51852 | 0.604092  | 0.986963  |
| gene1653 | gene1653 | SACOL1688 | gi 57650036 ref NC_002951.2 :1716772-1718097 | q1 | q2 | OK | 117.726 | 140.402 | 0.254132  | -0.2261  | 0.821128  | 0.992727  |
| gene1654 | gene1654 | relA2     | gi 57650036 ref NC_002951.2 :1718108-1720298 | q1 | q2 | OK | 139.914 | 133.218 | -0.07075  | 0.07769  | 0.938077  | 0.996932  |
| gene1655 | gene1655 | apt       | gi 57650036 ref NC_002951.2 :1720725-1721244 | q1 | q2 | OK | 121.619 | 58.9815 | -1.04404  | 2.13158  | 0.0330411 | 0.42162   |
| gene1656 | gene1656 | recJ      | gi 57650036 ref NC_002951.2 :1721265-1723539 | q1 | q2 | OK | 39.1567 | 34.275  | -0.192103 | 0.34816  | 0.727718  | 0.986963  |
| gene1657 | gene1657 | SACOL1692 | gi 57650036 ref NC_002951.2 :1723741-1726021 | q1 | q2 | OK | 92.1647 | 89.6041 | -0.040649 | 0.0507   | 0.959563  | 0.996932  |
| gene1658 | gene1658 | yajC      | gi 57650036 ref NC_002951.2 :1726295-1726556 | q1 | q2 | OK | 256.116 | 111.53  | -1.19937  | 2.35254  | 0.0186457 | 0.315668  |
| gene1659 | gene1659 | tgt       | gi 57650036 ref NC_002951.2 :1726574-1727714 | q1 | q2 | OK | 108.832 | 84.1306 | -0.371395 | 0.62859  | 0.529615  | 0.97289   |
| gene166  | gene166  | entB      | gi 57650036 ref NC_002951.2 :198037-198535   | q1 | q2 | OK | 54.1461 | 31.4547 | -0.783582 | 1.53884  | 0.123843  | 0.732386  |
| gene1660 | gene1660 | queA      | gi 57650036 ref NC_002951.2 :1727736-1728762 | q1 | q2 | OK | 97.274  | 55.9846 | -0.797025 | 1.49689  | 0.134422  | 0.751793  |
| gene1661 | gene1661 | ruvB      | gi 57650036 ref NC_002951.2 :1728763-1729768 | q1 | q2 | OK | 146.189 | 84.2719 | -0.79471  | 1.32066  | 0.186614  | 0.819812  |
| gene1662 | gene1662 | ruvA      | gi 57650036 ref NC_002951.2 :1729799-1730402 | q1 | q2 | OK | 91.4046 | 51.2849 | -0.833732 | 1.71163  | 0.0869642 | 0.638501  |
| gene1663 | gene1663 | SACOL1698 | gi 57650036 ref NC_002951.2 :1730415-1730874 | q1 | q2 | OK | 46.2749 | 35.8939 | -0.366493 | 0.71036  | 0.47748   | 0.960423  |
| gene1664 | gene1664 | obgE      | gi 57650036 ref NC_002951.2 :1730883-1732176 | q1 | q2 | OK | 180.108 | 97.0743 | -0.8917   | 1.22288  | 0.221375  | 0.849926  |
| gene1665 | gene1665 | rpmA      | gi 57650036 ref NC_002951.2 :1732530-1732815 | q1 | q2 | OK | 1951.32 | 508.22  | -1.94093  | 2.76983  | 0.0056085 | 0.151098  |
| gene1666 | gene1666 | SACOL1701 | gi 57650036 ref NC_002951.2 :1732826-1733147 | q1 | q2 | OK | 506.413 | 164.242 | -1.62449  | 3.13114  | 0.0017413 | 0.0767082 |
| gene1667 | gene1667 | rplU      | gi 57650036 ref NC_002951.2 :1733152-1733461 | q1 | q2 | OK | 2020.7  | 674.066 | -1.58389  | 2.07201  | 0.0382645 | 0.45109   |
| gene1668 | gene1668 | SACOL1703 | gi 57650036 ref NC_002951.2 :1733627-1735000 | q1 | q2 | OK | 41.5382 | 41.763  | 0.0077896 | -0.00686 | 0.994526  | 0.998143  |
| gene1669 | gene1669 | mreC      | gi 57650036 ref NC_002951.2 :1733627-1735000 | q1 | q2 | OK | 101.907 | 48.6678 | -1.06621  | 1.74228  | 0.0814602 | 0.629918  |
| gene167  | gene167  | ipdC      | gi 57650036 ref NC_002951.2 :198661-200302   | q1 | q2 | OK | 59.061  | 43.439  | -0.443215 | 0.80672  | 0.419826  | 0.939652  |
| gene1670 | gene1670 | SACOL1705 | gi 57650036 ref NC_002951.2 :1735392-1735866 | q1 | q2 | OK | 92.1667 | 45.3944 | -1.02173  | 2.06528  | 0.0388962 | 0.454271  |
| gene1671 | gene1671 | SACOL1706 | gi 57650036 ref NC_002951.2 :1736339-1736624 | q1 | q2 | OK | 147.646 | 93.9242 | -0.652577 | 1.2769   | 0.201638  | 0.819847  |
| gene1672 | gene1672 | radC      | gi 57650036 ref NC_002951.2 :1736691-1738082 | q1 | q2 | OK | 41.9712 | 68.4416 | 0.705471  | -1.07354 | 0.283027  | 0.880646  |
| gene1673 | gene1673 | SACOL1708 | gi 57650036 ref NC_002951.2 :1736691-1738082 | q1 | q2 | OK | 35.6152 | 39.0206 | 0.131744  | -0.16968 | 0.86526   | 0.996923  |
| gene1674 | gene1674 | folC      | gi 57650036 ref NC_002951.2 :1738351-1739623 | q1 | q2 | OK | 122.848 | 86.3195 | -0.509112 | 0.78992  | 0.429576  | 0.940178  |
| gene1675 | gene1675 | valS      | gi 57650036 ref NC_002951.2 :1739635-1742266 | q1 | q2 | OK | 112.314 | 104.415 | -0.105211 | 0.11676  | 0.90705   | 0.996932  |
| gene1676 | gene1676 | SACOL1711 | gi 57650036 ref NC_002951.2 :1742668-1743229 | q1 | q2 | OK | 229.848 | 91.934  | -1.32201  | 2.46942  | 0.0135331 | 0.270921  |
| gene1677 | gene1677 | SACOL1712 | gi 57650036 ref NC_002951.2 :1743451-1744525 | q1 | q2 | OK | 71.5443 | 89.6182 | 0.324955  | -0.59952 | 0.548824  | 0.979019  |
| gene1678 | gene1678 | hemL1     | gi 57650036 ref NC_002951.2 :1744720-1746007 | q1 | q2 | OK | 117.89  | 65.986  | -0.837208 | 1.3556   | 0.175227  | 0.819812  |
| gene1679 | gene1679 | hemB      | gi 57650036 ref NC_002951.2 :1746054-1747029 | q1 | q2 | OK | 88.7985 | 64.5955 | -0.459103 | 0.88049  | 0.378595  | 0.932987  |

|          |          |           |                                              |    |    |        |         |         |           |          |           |          |
|----------|----------|-----------|----------------------------------------------|----|----|--------|---------|---------|-----------|----------|-----------|----------|
| gene168  | gene168  | SACOL0174 | gi 57650036 ref NC_002951.2 :200495-202621   | q1 | q2 | NOTEST | 0       | 0       | 0         | 0        | 1         | 1        |
| gene1680 | gene1680 | hemD      | gi 57650036 ref NC_002951.2 :1747031-1747700 | q1 | q2 | OK     | 41.17   | 40.79   | -0.013378 | 0.02743  | 0.97812   | 0.998143 |
| gene1681 | gene1681 | hemC      | gi 57650036 ref NC_002951.2 :1747721-1748648 | q1 | q2 | OK     | 104.644 | 55.9683 | -0.902806 | 1.72189  | 0.0850889 | 0.638501 |
| gene1682 | gene1682 | SACOL1718 | gi 57650036 ref NC_002951.2 :1748689-1749505 | q1 | q2 | OK     | 58.7996 | 34.6636 | -0.762384 | 1.56825  | 0.116822  | 0.723345 |
| gene1683 | gene1683 | hemA      | gi 57650036 ref NC_002951.2 :1749526-1750873 | q1 | q2 | OK     | 578.951 | 374.037 | -0.630259 | 0.59801  | 0.549834  | 0.979019 |
| gene1684 | gene1684 | engB      | gi 57650036 ref NC_002951.2 :1751089-1751680 | q1 | q2 | OK     | 86.8795 | 61.2129 | -0.505181 | 1.04293  | 0.29698   | 0.892668 |
| gene1685 | gene1685 | clpX      | gi 57650036 ref NC_002951.2 :1751833-1753096 | q1 | q2 | OK     | 336.067 | 296.25  | -0.181934 | 0.18769  | 0.851118  | 0.996923 |
| gene1686 | gene1686 | tig       | gi 57650036 ref NC_002951.2 :1753246-1754548 | q1 | q2 | OK     | 574.093 | 241.621 | -1.24854  | 1.25215  | 0.210516  | 0.830641 |
| gene1687 | gene1687 | SACOL1723 | gi 57650036 ref NC_002951.2 :1754710-1755640 | q1 | q2 | OK     | 75.8183 | 59.8138 | -0.342068 | 0.67928  | 0.496959  | 0.964002 |
| gene1688 | gene1688 | SACOL1724 | gi 57650036 ref NC_002951.2 :1755658-1756267 | q1 | q2 | OK     | 141.15  | 118.188 | -0.256154 | 0.50095  | 0.616408  | 0.986963 |
| gene1689 | gene1689 | rpIT      | gi 57650036 ref NC_002951.2 :1756408-1756765 | q1 | q2 | OK     | 154.519 | 70.5238 | -1.1316   | 2.27716  | 0.0227766 | 0.342468 |
| gene169  | gene169  | SACOL0175 | gi 57650036 ref NC_002951.2 :200495-202621   | q1 | q2 | OK     | 58.3258 | 56.7097 | -0.040538 | 0.06478  | 0.948347  | 0.996932 |
| gene1690 | gene1690 | rpmI      | gi 57650036 ref NC_002951.2 :1756811-1757012 | q1 | q2 | OK     | 88.6976 | 57.4554 | -0.626452 | 0.85849  | 0.39062   | 0.939607 |
| gene1691 | gene1691 | infC      | gi 57650036 ref NC_002951.2 :1757040-1757568 | q1 | q2 | OK     | 235.203 | 116.421 | -1.01456  | 1.91447  | 0.0555605 | 0.538882 |
| gene1692 | gene1692 | SACOL1728 | gi 57650036 ref NC_002951.2 :1757796-1759290 | q1 | q2 | OK     | 111.946 | 135.445 | 0.274904  | -0.36612 | 0.714279  | 0.986963 |
| gene1693 | gene1693 | thrS      | gi 57650036 ref NC_002951.2 :1759715-1761653 | q1 | q2 | OK     | 299.764 | 64.8701 | -2.2082   | 2.53061  | 0.0113865 | 0.247006 |
| gene1694 | gene1694 | dnaI      | gi 57650036 ref NC_002951.2 :1762065-1764386 | q1 | q2 | OK     | 228.487 | 114.1   | -1.00181  | 0.75745  | 0.448782  | 0.948742 |
| gene1695 | gene1695 | SACOL1732 | gi 57650036 ref NC_002951.2 :1762065-1764386 | q1 | q2 | OK     | 170.791 | 77.7226 | -1.13583  | 0.935    | 0.349788  | 0.913467 |
| gene1696 | gene1696 | nrdR      | gi 57650036 ref NC_002951.2 :1764386-1764857 | q1 | q2 | OK     | 307.595 | 114.208 | -1.42937  | 2.65368  | 0.0079619 | 0.196004 |
| gene1697 | gene1697 | gapA2     | gi 57650036 ref NC_002951.2 :1765066-1766092 | q1 | q2 | OK     | 855.768 | 379.66  | -1.17251  | 1.14454  | 0.252401  | 0.875384 |
| gene1698 | gene1698 | coaE      | gi 57650036 ref NC_002951.2 :1766261-1766885 | q1 | q2 | OK     | 230.033 | 133.349 | -0.786632 | 1.38225  | 0.166896  | 0.814226 |
| gene1699 | gene1699 | fpg       | gi 57650036 ref NC_002951.2 :1766900-1767773 | q1 | q2 | OK     | 136.653 | 81.4195 | -0.747073 | 1.34469  | 0.178726  | 0.819812 |
| gene17   | gene17   | purA      | gi 57650036 ref NC_002951.2 :22464-23748     | q1 | q2 | OK     | 67.2951 | 64.6046 | -0.058864 | 0.10846  | 0.913635  | 0.996932 |
| gene170  | gene170  | SACOL0176 | gi 57650036 ref NC_002951.2 :203206-205158   | q1 | q2 | OK     | 193.18  | 47.0955 | -2.03629  | 1.95276  | 0.0508483 | 0.516924 |
| gene1700 | gene1700 | polA      | gi 57650036 ref NC_002951.2 :1767788-1770419 | q1 | q2 | OK     | 149.877 | 87.6157 | -0.774522 | 0.84633  | 0.397368  | 0.939607 |
| gene1701 | gene1701 | SACOL1738 | gi 57650036 ref NC_002951.2 :1770712-1772200 | q1 | q2 | OK     | 28.3987 | 32.1173 | 0.177522  | -0.36346 | 0.716263  | 0.986963 |
| gene1702 | gene1702 | SACOL1739 | gi 57650036 ref NC_002951.2 :1772698-1775064 | q1 | q2 | OK     | 154.325 | 79.5829 | -0.95544  | 0.84883  | 0.395975  | 0.939607 |
| gene1703 | gene1703 | phoP      | gi 57650036 ref NC_002951.2 :1772698-1775064 | q1 | q2 | OK     | 199.785 | 164.828 | -0.277489 | 0.18406  | 0.85397   | 0.996923 |
| gene1704 | gene1704 | icd       | gi 57650036 ref NC_002951.2 :1775453-1776722 | q1 | q2 | OK     | 1633.96 | 1384.8  | -0.238689 | 0.22214  | 0.824207  | 0.992727 |
| gene1705 | gene1705 | gltA      | gi 57650036 ref NC_002951.2 :1776770-1777892 | q1 | q2 | OK     | 906.391 | 782.525 | -0.211996 | 0.19328  | 0.84674   | 0.996923 |
| gene1706 | gene1706 | SACOL1743 | gi 57650036 ref NC_002951.2 :1778239-1779601 | q1 | q2 | OK     | 257.973 | 211.385 | -0.287346 | 0.31489  | 0.752846  | 0.986963 |
| gene1707 | gene1707 | SACOL1744 | gi 57650036 ref NC_002951.2 :1779633-1781285 | q1 | q2 | OK     | 11.2256 | 19.8017 | 0.818828  | -1.67543 | 0.0938492 | 0.661953 |
| gene1708 | gene1708 | pyk       | gi 57650036 ref NC_002951.2 :1781925-1783683 | q1 | q2 | OK     | 163.844 | 96.964  | -0.756799 | 0.92611  | 0.354392  | 0.914747 |

|          |          |           |                                              |    |    |        |         |         |            |            |           |           |
|----------|----------|-----------|----------------------------------------------|----|----|--------|---------|---------|------------|------------|-----------|-----------|
| gene1709 | gene1709 | pfkA      | gi 57650036 ref NC_002951.2 :1783704-1784673 | q1 | q2 | OK     | 321.582 | 126.477 | -1.34631   | 1.76692    | 0.0772413 | 0.619658  |
| gene171  | gene171  | murQ      | gi 57650036 ref NC_002951.2 :203206-205158   | q1 | q2 | OK     | 146.473 | 75.2208 | -0.961431  | 0.81315    | 0.416131  | 0.939652  |
| gene1710 | gene1710 | accA      | gi 57650036 ref NC_002951.2 :1784941-1786743 | q1 | q2 | OK     | 96.4046 | 65.9231 | -0.548318  | 0.64442    | 0.519301  | 0.971416  |
| gene1711 | gene1711 | accD      | gi 57650036 ref NC_002951.2 :1784941-1786743 | q1 | q2 | OK     | 84.751  | 58.7491 | -0.528663  | 0.55023    | 0.582164  | 0.985265  |
| gene1712 | gene1712 | SACOL1749 | gi 57650036 ref NC_002951.2 :1786937-1788167 | q1 | q2 | OK     | 110.168 | 94.3269 | -0.22396   | 0.35738    | 0.720811  | 0.986963  |
| gene1713 | gene1713 | dnaE      | gi 57650036 ref NC_002951.2 :1788616-1791814 | q1 | q2 | OK     | 122.621 | 74.1669 | -0.725358  | 0.78691    | 0.431337  | 0.940181  |
| gene1714 | gene1714 | SACOL1751 | gi 57650036 ref NC_002951.2 :1791834-1792776 | q1 | q2 | OK     | 116.524 | 78.8978 | -0.562566  | 1.02203    | 0.306766  | 0.892668  |
| gene1715 | gene1715 | SACOL1752 | gi 57650036 ref NC_002951.2 :1793036-1794335 | q1 | q2 | OK     | 108.248 | 73.3326 | -0.561813  | 0.9147     | 0.36035   | 0.923053  |
| gene1716 | gene1716 | SACOL1753 | gi 57650036 ref NC_002951.2 :1794539-1794953 | q1 | q2 | OK     | 490.685 | 98.3259 | -2.31915   | 4.0179     | 5.87E-05  | 0.0086731 |
| gene1717 | gene1717 | SACOL1754 | gi 57650036 ref NC_002951.2 :1795257-1795946 | q1 | q2 | OK     | 296.449 | 278.431 | -0.090463  | 0.12565    | 0.90001   | 0.996932  |
| gene1718 | gene1718 | pepQ      | gi 57650036 ref NC_002951.2 :1796120-1797176 | q1 | q2 | OK     | 71.0413 | 46.0355 | -0.625911  | 1.23692    | 0.216116  | 0.836415  |
| gene1719 | gene1719 | SACOL1757 | gi 57650036 ref NC_002951.2 :1797269-1797368 | q1 | q2 | NOTEST | 0       | 0       | 0          | 0          | 1         | 1         |
| gene172  | gene172  | SACOL0178 | gi 57650036 ref NC_002951.2 :205169-206624   | q1 | q2 | OK     | 131.074 | 74.6318 | -0.812522  | 1.18885    | 0.234499  | 0.863102  |
| gene1720 | gene1720 | ald2      | gi 57650036 ref NC_002951.2 :1797491-1798610 | q1 | q2 | OK     | 580.652 | 153.249 | -1.92179   | 2.12903    | 0.0332518 | 0.421693  |
| gene1721 | gene1721 | SACOL1759 | gi 57650036 ref NC_002951.2 :1798750-1799251 | q1 | q2 | OK     | 1424.68 | 782.695 | -0.864119  | 0.89814    | 0.369109  | 0.928011  |
| gene1722 | gene1722 | ackA      | gi 57650036 ref NC_002951.2 :1799496-1800699 | q1 | q2 | OK     | 258.74  | 213.607 | -0.276547  | 0.31681    | 0.751391  | 0.986963  |
| gene1723 | gene1723 | SACOL1761 | gi 57650036 ref NC_002951.2 :1800786-1801734 | q1 | q2 | OK     | 138.039 | 448.075 | 1.69867    | -2.08179   | 0.0373615 | 0.444619  |
| gene1724 | gene1724 | tpx       | gi 57650036 ref NC_002951.2 :1801856-1802351 | q1 | q2 | OK     | 519.125 | 814.667 | 0.65013    | -0.78492   | 0.432502  | 0.940247  |
| gene1725 | gene1725 | SACOL1763 | gi 57650036 ref NC_002951.2 :1802448-1803219 | q1 | q2 | OK     | 139.84  | 160.949 | 0.202829   | -0.34932   | 0.726853  | 0.986963  |
| gene1726 | gene1726 | thiI      | gi 57650036 ref NC_002951.2 :1803262-1805625 | q1 | q2 | OK     | 76.7122 | 64.009  | -0.261183  | 0.29547    | 0.767633  | 0.986963  |
| gene1727 | gene1727 | SACOL1765 | gi 57650036 ref NC_002951.2 :1803262-1805625 | q1 | q2 | OK     | 55.4874 | 54.8437 | -0.016834  | 0.01616    | 0.987104  | 0.998143  |
| gene1728 | gene1728 | SACOL1766 | gi 57650036 ref NC_002951.2 :1805782-1805923 | q1 | q2 | OK     | 0       | 110.339 | 1.79769e+3 | 1.79769e+0 | 0.0633551 | 0.55727   |
| gene1729 | gene1729 | SACOL1767 | gi 57650036 ref NC_002951.2 :1805996-1807691 | q1 | q2 | OK     | 243.943 | 132.747 | -0.877866  | 0.96787    | 0.333108  | 0.902303  |
| gene173  | gene173  | SACOL0179 | gi 57650036 ref NC_002951.2 :206626-207502   | q1 | q2 | OK     | 86.1906 | 41.0105 | -1.07154   | 2.13915    | 0.0324234 | 0.420136  |
| gene1730 | gene1730 | SACOL1768 | gi 57650036 ref NC_002951.2 :1807827-1808292 | q1 | q2 | OK     | 40.2554 | 36.5363 | -0.139849  | 0.26999    | 0.787168  | 0.986986  |
| gene1731 | gene1731 | rpsD      | gi 57650036 ref NC_002951.2 :1808535-1809138 | q1 | q2 | OK     | 166.82  | 78.0286 | -1.09622   | 2.13664    | 0.0326271 | 0.420136  |
| gene1732 | gene1732 | SACOL1770 | gi 57650036 ref NC_002951.2 :1809353-1810097 | q1 | q2 | OK     | 32.9822 | 43.5862 | 0.402183   | -0.82642   | 0.408568  | 0.939607  |
| gene1733 | gene1733 | SACOL1771 | gi 57650036 ref NC_002951.2 :1810176-1810623 | q1 | q2 | OK     | 60.7588 | 76.5475 | 0.333261   | -0.67859   | 0.4974    | 0.964002  |
| gene1734 | gene1734 | SACOL1772 | gi 57650036 ref NC_002951.2 :1810736-1813488 | q1 | q2 | OK     | 40.3264 | 48.8    | 0.275156   | -0.24656   | 0.805252  | 0.989715  |
| gene1735 | gene1735 | serA      | gi 57650036 ref NC_002951.2 :1810736-1813488 | q1 | q2 | OK     | 50.2368 | 61.2752 | 0.286557   | -0.34597   | 0.729369  | 0.986963  |
| gene1736 | gene1736 | SACOL1774 | gi 57650036 ref NC_002951.2 :1813637-1814768 | q1 | q2 | OK     | 83.8898 | 69.5888 | -0.269641  | 0.49553    | 0.620228  | 0.986963  |
| gene1737 | gene1737 | SACOL1775 | gi 57650036 ref NC_002951.2 :1814874-1816341 | q1 | q2 | OK     | 76.1538 | 46.5437 | -0.710329  | 1.26395    | 0.206247  | 0.823389  |
| gene1738 | gene1738 | SACOL1776 | gi 57650036 ref NC_002951.2 :1816468-1817086 | q1 | q2 | OK     | 61.8188 | 27.9487 | -1.14526   | 2.30308    | 0.0212745 | 0.341601  |

|          |          |           |                                              |    |    |        |         |         |           |          |           |          |
|----------|----------|-----------|----------------------------------------------|----|----|--------|---------|---------|-----------|----------|-----------|----------|
| gene1739 | gene1739 | SACOL1777 | gi 57650036 ref NC_002951.2 :1817257-1818532 | q1 | q2 | OK     | 75.1602 | 90.0778 | 0.261202  | -0.44711 | 0.654798  | 0.986963 |
| gene174  | gene174  | SACOL0180 | gi 57650036 ref NC_002951.2 :208189-210979   | q1 | q2 | OK     | 44.1495 | 41.6436 | -0.084302 | 0.1323   | 0.894747  | 0.996932 |
| gene1740 | gene1740 | tyrS      | gi 57650036 ref NC_002951.2 :1818625-1819888 | q1 | q2 | OK     | 44.4918 | 57.9033 | 0.380106  | -0.74446 | 0.456598  | 0.950521 |
| gene1741 | gene1741 | SACOL1779 | gi 57650036 ref NC_002951.2 :1820269-1821175 | q1 | q2 | OK     | 47.2239 | 49.7312 | 0.0746356 | -0.15396 | 0.877639  | 0.996932 |
| gene1742 | gene1742 | SACOL1781 | gi 57650036 ref NC_002951.2 :1821377-1824065 | q1 | q2 | OK     | 100.869 | 43.2862 | -1.22051  | 1.58718  | 0.112473  | 0.720082 |
| gene1743 | gene1743 | fhs       | gi 57650036 ref NC_002951.2 :1824398-1826066 | q1 | q2 | OK     | 380.142 | 278.957 | -0.446497 | 0.42993  | 0.667248  | 0.986963 |
| gene1744 | gene1744 | acs       | gi 57650036 ref NC_002951.2 :1826505-1828212 | q1 | q2 | OK     | 386.512 | 787.436 | 1.02665   | -0.94623 | 0.34403   | 0.906464 |
| gene1745 | gene1745 | acuA      | gi 57650036 ref NC_002951.2 :1828380-1829013 | q1 | q2 | OK     | 157.026 | 66.0762 | -1.2488   | 2.43369  | 0.0149458 | 0.287414 |
| gene1746 | gene1746 | acuC      | gi 57650036 ref NC_002951.2 :1829037-1830207 | q1 | q2 | OK     | 186.652 | 117.874 | -0.6631   | 0.91485  | 0.360269  | 0.923053 |
| gene1747 | gene1747 | ccpA      | gi 57650036 ref NC_002951.2 :1830304-1831294 | q1 | q2 | OK     | 361.096 | 213.447 | -0.758502 | 0.88776  | 0.37467   | 0.932404 |
| gene1748 | gene1748 | SACOL1787 | gi 57650036 ref NC_002951.2 :1831833-1832925 | q1 | q2 | OK     | 167.23  | 97.734  | -0.774897 | 1.17181  | 0.241274  | 0.865486 |
| gene1749 | gene1749 | SACOL1788 | gi 57650036 ref NC_002951.2 :1833624-1835142 | q1 | q2 | OK     | 506.235 | 664.757 | 0.39302   | -0.35922 | 0.719432  | 0.986963 |
| gene175  | gene175  | SACOL0181 | gi 57650036 ref NC_002951.2 :211183-212026   | q1 | q2 | OK     | 167.786 | 59.0823 | -1.50582  | 2.64822  | 0.0080918 | 0.197267 |
| gene1750 | gene1750 | SACOL1789 | gi 57650036 ref NC_002951.2 :1835215-1835707 | q1 | q2 | OK     | 796.848 | 1271.47 | 0.674126  | -0.71115 | 0.476993  | 0.960423 |
| gene1751 | gene1751 | murC      | gi 57650036 ref NC_002951.2 :1835780-1837094 | q1 | q2 | OK     | 163.072 | 114.678 | -0.507921 | 0.68699  | 0.492087  | 0.964002 |
| gene1752 | gene1752 | SACOL1791 | gi 57650036 ref NC_002951.2 :1837117-1840942 | q1 | q2 | OK     | 104.056 | 84.2384 | -0.304816 | 0.31494  | 0.752805  | 0.986963 |
| gene1753 | gene1753 | SACOL1792 | gi 57650036 ref NC_002951.2 :1840962-1841559 | q1 | q2 | OK     | 79.9862 | 72.1364 | -0.149024 | 0.3084   | 0.757776  | 0.986963 |
| gene1754 | gene1754 | SACOL1793 | gi 57650036 ref NC_002951.2 :1841587-1842445 | q1 | q2 | OK     | 68.6399 | 46.9993 | -0.546408 | 1.11502  | 0.264841  | 0.875983 |
| gene1755 | gene1755 | SACOL1794 | gi 57650036 ref NC_002951.2 :1842544-1842856 | q1 | q2 | OK     | 191.032 | 189.902 | -0.008558 | 0.01772  | 0.98586   | 0.998143 |
| gene1756 | gene1756 | pepA1     | gi 57650036 ref NC_002951.2 :1842920-1843997 | q1 | q2 | OK     | 242.192 | 190.022 | -0.349988 | 0.43433  | 0.664047  | 0.986963 |
| gene1757 | gene1757 | SACOL1796 | gi 57650036 ref NC_002951.2 :1844083-1844395 | q1 | q2 | OK     | 84.1836 | 67.3846 | -0.321119 | 0.61259  | 0.54015   | 0.978583 |
| gene1758 | gene1758 | SACOL1797 | gi 57650036 ref NC_002951.2 :1844519-1845296 | q1 | q2 | OK     | 79.8802 | 50.9569 | -0.648559 | 1.32162  | 0.186294  | 0.819812 |
| gene1759 | gene1759 | trmB      | gi 57650036 ref NC_002951.2 :1845831-1846476 | q1 | q2 | OK     | 477.903 | 153.323 | -1.64015  | 2.29637  | 0.0216549 | 0.342403 |
| gene176  | gene176  | SACOL0182 | gi 57650036 ref NC_002951.2 :212027-214050   | q1 | q2 | NOTEST | 0       | 0       | 0         | 0        | 1         | 1        |
| gene1760 | gene1760 | SACOL1799 | gi 57650036 ref NC_002951.2 :1846490-1847282 | q1 | q2 | OK     | 457.157 | 136.519 | -1.74359  | 2.2826   | 0.0224538 | 0.342403 |
| gene1761 | gene1761 | dat       | gi 57650036 ref NC_002951.2 :1847831-1848680 | q1 | q2 | OK     | 178.208 | 268.934 | 0.593692  | -0.82105 | 0.411616  | 0.939607 |
| gene1762 | gene1762 | SACOL1801 | gi 57650036 ref NC_002951.2 :1848683-1850093 | q1 | q2 | OK     | 120.922 | 161.956 | 0.42152   | -0.54684 | 0.58449   | 0.985265 |
| gene1763 | gene1763 | SACOL1802 | gi 57650036 ref NC_002951.2 :1851012-1851435 | q1 | q2 | OK     | 532.499 | 563.47  | 0.0815607 | -0.11772 | 0.906287  | 0.996932 |
| gene1764 | gene1764 | SACOL1803 | gi 57650036 ref NC_002951.2 :1851451-1853805 | q1 | q2 | OK     | 87.5553 | 60.5432 | -0.532229 | 0.39119  | 0.695658  | 0.986963 |
| gene1765 | gene1765 | SACOL1804 | gi 57650036 ref NC_002951.2 :1851451-1853805 | q1 | q2 | OK     | 88.5066 | 51.5835 | -0.778877 | 0.94074  | 0.346839  | 0.91195  |
| gene1766 | gene1766 | SACOL1805 | gi 57650036 ref NC_002951.2 :1854211-1855480 | q1 | q2 | OK     | 89.2339 | 78.8882 | -0.177783 | 0.30293  | 0.761942  | 0.986963 |
| gene1767 | gene1767 | SACOL1806 | gi 57650036 ref NC_002951.2 :1855596-1862157 | q1 | q2 | OK     | 36.1321 | 43.2108 | 0.258112  | -0.29138 | 0.770763  | 0.986963 |
| gene1768 | gene1768 | SACOL1807 | gi 57650036 ref NC_002951.2 :1862482-1862794 | q1 | q2 | OK     | 102.801 | 59.2168 | -0.795777 | 1.51741  | 0.129162  | 0.738783 |

|          |          |           |                                              |    |    |        |         |         |           |          |           |          |
|----------|----------|-----------|----------------------------------------------|----|----|--------|---------|---------|-----------|----------|-----------|----------|
| gene1769 | gene1769 | leuS      | gi 57650036 ref NC_002951.2 :1862815-1865233 | q1 | q2 | OK     | 59.8828 | 52.5378 | -0.188784 | 0.28128  | 0.778497  | 0.986963 |
| gene177  | gene177  | SACOL0183 | gi 57650036 ref NC_002951.2 :212027-214050   | q1 | q2 | NOTEST | 0       | 0       | 0         | 0        | 1         | 1        |
| gene1770 | gene1770 | SACOL1809 | gi 57650036 ref NC_002951.2 :1865520-1866702 | q1 | q2 | OK     | 93.4755 | 68.2872 | -0.452973 | 0.8033   | 0.421804  | 0.939652 |
| gene1771 | gene1771 | SACOL1810 | gi 57650036 ref NC_002951.2 :1866811-1868325 | q1 | q2 | OK     | 66.8713 | 69.9547 | 0.0650337 | -0.10646 | 0.915219  | 0.996932 |
| gene1772 | gene1772 | SACOL1811 | gi 57650036 ref NC_002951.2 :1866811-1868325 | q1 | q2 | OK     | 37.1873 | 46.1256 | 0.310758  | -0.27949 | 0.779869  | 0.986963 |
| gene1773 | gene1773 | rot       | gi 57650036 ref NC_002951.2 :1868444-1868945 | q1 | q2 | OK     | 267.585 | 542.569 | 1.01981   | -1.49703 | 0.134385  | 0.751793 |
| gene1774 | gene1774 | SACOL1813 | gi 57650036 ref NC_002951.2 :1869365-1870078 | q1 | q2 | OK     | 26.9972 | 41.8946 | 0.633953  | -1.28528 | 0.198695  | 0.819847 |
| gene1775 | gene1775 | SACOL1814 | gi 57650036 ref NC_002951.2 :1870424-1871252 | q1 | q2 | OK     | 296.538 | 155.135 | -0.934694 | 1.30766  | 0.190989  | 0.819847 |
| gene1776 | gene1776 | SACOL1815 | gi 57650036 ref NC_002951.2 :1871254-1871374 | q1 | q2 | OK     | 76.5944 | 580.797 | 2.92272   | -1.52513 | 0.127226  | 0.732663 |
| gene1777 | gene1777 | putA      | gi 57650036 ref NC_002951.2 :1871485-1872487 | q1 | q2 | OK     | 304.813 | 91.5212 | -1.73575  | 2.35467  | 0.018539  | 0.315668 |
| gene1778 | gene1778 | ribH      | gi 57650036 ref NC_002951.2 :1872608-1873073 | q1 | q2 | OK     | 37.9104 | 47.3099 | 0.319548  | -0.62452 | 0.532287  | 0.97289  |
| gene1779 | gene1779 | ribBA     | gi 57650036 ref NC_002951.2 :1873085-1874267 | q1 | q2 | OK     | 37.2076 | 48.1716 | 0.372586  | -0.75665 | 0.449258  | 0.948742 |
| gene178  | gene178  | SACOL0184 | gi 57650036 ref NC_002951.2 :214314-215907   | q1 | q2 | OK     | 38.5635 | 37.4155 | -0.043599 | 0.08602  | 0.931447  | 0.996932 |
| gene1780 | gene1780 | ribE      | gi 57650036 ref NC_002951.2 :1874277-1874910 | q1 | q2 | OK     | 33.8976 | 43.1698 | 0.348839  | -0.70705 | 0.479538  | 0.960423 |
| gene1781 | gene1781 | ribD      | gi 57650036 ref NC_002951.2 :1874916-1875960 | q1 | q2 | OK     | 55.2342 | 59.2673 | 0.101676  | -0.20314 | 0.839022  | 0.996923 |
| gene1782 | gene1782 | SACOL1821 | gi 57650036 ref NC_002951.2 :1876440-1877943 | q1 | q2 | OK     | 28.686  | 56.6935 | 0.982837  | -1.89901 | 0.0575632 | 0.540443 |
| gene1783 | gene1783 | arsR      | gi 57650036 ref NC_002951.2 :1878465-1880072 | q1 | q2 | OK     | 50.7407 | 49.8983 | -0.024154 | 0.01896  | 0.984872  | 0.998143 |
| gene1784 | gene1784 | arsB      | gi 57650036 ref NC_002951.2 :1878465-1880072 | q1 | q2 | OK     | 32.8123 | 37.0431 | 0.174966  | -0.32498 | 0.745199  | 0.986963 |
| gene1785 | gene1785 | arsC      | gi 57650036 ref NC_002951.2 :1880089-1880485 | q1 | q2 | OK     | 29.5658 | 34.7123 | 0.231522  | -0.4173  | 0.676462  | 0.986963 |
| gene1786 | gene1786 | SACOL1825 | gi 57650036 ref NC_002951.2 :1880779-1881634 | q1 | q2 | OK     | 262.95  | 316.3   | 0.266505  | -0.32926 | 0.74196   | 0.986963 |
| gene1787 | gene1787 | SACOL1826 | gi 57650036 ref NC_002951.2 :1881909-1882134 | q1 | q2 | OK     | 335.827 | 224.368 | -0.581849 | 1.15029  | 0.250024  | 0.870749 |
| gene1788 | gene1788 | SACOL1827 | gi 57650036 ref NC_002951.2 :1882332-1882803 | q1 | q2 | OK     | 27.5801 | 35.3174 | 0.356749  | -0.67098 | 0.502236  | 0.965124 |
| gene1789 | gene1789 | SACOL1828 | gi 57650036 ref NC_002951.2 :1882915-1883789 | q1 | q2 | OK     | 39.9665 | 30.8693 | -0.372621 | 0.44512  | 0.656232  | 0.986963 |
| gene179  | gene179  | SACOL0185 | gi 57650036 ref NC_002951.2 :216034-217342   | q1 | q2 | OK     | 29.4365 | 40.31   | 0.453534  | -0.92717 | 0.353841  | 0.914747 |
| gene1790 | gene1790 | SACOL1829 | gi 57650036 ref NC_002951.2 :1882915-1883789 | q1 | q2 | OK     | 82.4573 | 59.2083 | -0.477848 | 0.8054   | 0.420591  | 0.939652 |
| gene1791 | gene1791 | SACOL1830 | gi 57650036 ref NC_002951.2 :1884084-1884720 | q1 | q2 | OK     | 54.9772 | 71.4735 | 0.378575  | -0.78383 | 0.433139  | 0.940247 |
| gene1792 | gene1792 | tal       | gi 57650036 ref NC_002951.2 :1885159-1885873 | q1 | q2 | OK     | 509.247 | 1087.46 | 1.09452   | -1.1025  | 0.270244  | 0.875983 |
| gene1793 | gene1793 | crcB      | gi 57650036 ref NC_002951.2 :1886612-1887406 | q1 | q2 | OK     | 50.4841 | 76.9202 | 0.607534  | -0.97261 | 0.330749  | 0.900771 |
| gene1794 | gene1794 | SACOL1833 | gi 57650036 ref NC_002951.2 :1886612-1887406 | q1 | q2 | OK     | 59.4325 | 64.8113 | 0.124994  | -0.16249 | 0.870922  | 0.996923 |
| gene1795 | gene1795 | SACOL1834 | gi 57650036 ref NC_002951.2 :1887816-1889426 | q1 | q2 | OK     | 15.0027 | 25.1099 | 0.743032  | -1.53052 | 0.125888  | 0.732386 |
| gene1796 | gene1796 | SACOL1835 | gi 57650036 ref NC_002951.2 :1889488-1890322 | q1 | q2 | OK     | 119.11  | 103.96  | -0.196267 | 0.36077  | 0.718271  | 0.986963 |
| gene1797 | gene1797 | SACOL1836 | gi 57650036 ref NC_002951.2 :1890533-1891442 | q1 | q2 | OK     | 169.379 | 68.098  | -1.31457  | 2.22485  | 0.0260916 | 0.37225  |
| gene1798 | gene1798 | metK      | gi 57650036 ref NC_002951.2 :1891566-1892760 | q1 | q2 | OK     | 85.3874 | 49.8231 | -0.77721  | 1.43966  | 0.149963  | 0.788621 |



|          |          |             |                                              |    |    |        |         |         |            |            |           |          |
|----------|----------|-------------|----------------------------------------------|----|----|--------|---------|---------|------------|------------|-----------|----------|
| gene1799 | gene1799 | pckA        | gi 57650036 ref NC_002951.2 :1893130-1894723 | q1 | q2 | OK     | 727.511 | 386.252 | -0.913426  | 0.84464    | 0.39831   | 0.939607 |
| gene18   | gene18   | SACOL_tRNA- | gi 57650036 ref NC_002951.2 :24177-24252     | q1 | q2 | NOTEST | 0       | 0       | 0          | 0          | 1         | 1        |
| gene180  | gene180  | SACOL0186   | gi 57650036 ref NC_002951.2 :217347-218511   | q1 | q2 | OK     | 31.9547 | 51.3462 | 0.684229   | -1.38991   | 0.164557  | 0.811825 |
| gene1800 | gene1800 | SACOL1839   | gi 57650036 ref NC_002951.2 :1894858-1895344 | q1 | q2 | OK     | 207.638 | 417.675 | 1.00831    | -1.66746   | 0.0954222 | 0.664499 |
| gene1801 | gene1801 | SACOL1840   | gi 57650036 ref NC_002951.2 :1895718-1896949 | q1 | q2 | OK     | 74.5299 | 95.76   | 0.361604   | -0.48564   | 0.62722   | 0.986963 |
| gene1802 | gene1802 | SACOL1841   | gi 57650036 ref NC_002951.2 :1895718-1896949 | q1 | q2 | OK     | 92.9909 | 137.883 | 0.568285   | -0.63332   | 0.526525  | 0.97289  |
| gene1803 | gene1803 | SACOL1842   | gi 57650036 ref NC_002951.2 :1897008-1898264 | q1 | q2 | OK     | 403.385 | 366.092 | -0.139952  | 0.13622    | 0.891644  | 0.996932 |
| gene1804 | gene1804 | SACOL1843   | gi 57650036 ref NC_002951.2 :1897008-1898264 | q1 | q2 | OK     | 64.5437 | 85.5489 | 0.406473   | -0.55551   | 0.578547  | 0.985265 |
| gene1805 | gene1805 | SACOL1844   | gi 57650036 ref NC_002951.2 :1898268-1899747 | q1 | q2 | OK     | 56.217  | 88.9611 | 0.662169   | -1.1099    | 0.267042  | 0.875983 |
| gene1806 | gene1806 | SACOL1845   | gi 57650036 ref NC_002951.2 :1899905-1900388 | q1 | q2 | OK     | 27.9989 | 37.429  | 0.418786   | -0.79609   | 0.425978  | 0.940178 |
| gene1807 | gene1807 | SACOL1846   | gi 57650036 ref NC_002951.2 :1900663-1901314 | q1 | q2 | OK     | 1024.52 | 437.979 | -1.22601   | 1.3047     | 0.191996  | 0.819847 |
| gene1808 | gene1808 | SACOL1847   | gi 57650036 ref NC_002951.2 :1901394-1902390 | q1 | q2 | OK     | 986.087 | 317.077 | -1.63688   | 1.63489    | 0.102072  | 0.686167 |
| gene1809 | gene1809 | SACOL1848   | gi 57650036 ref NC_002951.2 :1902465-1903092 | q1 | q2 | OK     | 55.5531 | 62.5038 | 0.170079   | -0.35241   | 0.72453   | 0.986963 |
| gene181  | gene181  | SACOL0187   | gi 57650036 ref NC_002951.2 :218527-220303   | q1 | q2 | OK     | 29.4953 | 43.1616 | 0.549265   | -1.0647    | 0.287014  | 0.887342 |
| gene1810 | gene1810 | SACOL1849   | gi 57650036 ref NC_002951.2 :1903132-1903477 | q1 | q2 | OK     | 28.2779 | 23.6122 | -0.260141  | 0.42606    | 0.670067  | 0.986963 |
| gene1811 | gene1811 | SACOL1850   | gi 57650036 ref NC_002951.2 :1903574-1904126 | q1 | q2 | OK     | 34.1253 | 31.5108 | -0.114995  | 0.22499    | 0.821985  | 0.992727 |
| gene1812 | gene1812 | SACOL1851   | gi 57650036 ref NC_002951.2 :1904343-1904985 | q1 | q2 | OK     | 41.8098 | 38.8689 | -0.105225  | 0.21462    | 0.830067  | 0.994686 |
| gene1813 | gene1813 | SACOL1853   | gi 57650036 ref NC_002951.2 :1905285-1905462 | q1 | q2 | OK     | 22.8744 | 18.4885 | -0.30711   | 0.2129     | 0.831402  | 0.994686 |
| gene1814 | gene1814 | SACOL1854   | gi 57650036 ref NC_002951.2 :1905472-1905856 | q1 | q2 | OK     | 166.853 | 174.702 | 0.0663166  | -0.13678   | 0.891203  | 0.996932 |
| gene1815 | gene1815 | SACOL1855   | gi 57650036 ref NC_002951.2 :1905957-1906735 | q1 | q2 | OK     | 60.1915 | 43.3184 | -0.47458   | 0.98011    | 0.327032  | 0.900129 |
| gene1816 | gene1816 | SACOL1857   | gi 57650036 ref NC_002951.2 :1907605-1907983 | q1 | q2 | OK     | 39.3129 | 27.7539 | -0.502311  | 0.89363    | 0.371522  | 0.929271 |
| gene1817 | gene1817 | SACOL1858   | gi 57650036 ref NC_002951.2 :1908503-1909064 | q1 | q2 | OK     | 27.4402 | 29.363  | 0.097708   | -0.18835   | 0.850605  | 0.996923 |
| gene1818 | gene1818 | SACOL1859   | gi 57650036 ref NC_002951.2 :1909268-1912319 | q1 | q2 | OK     | 16.4454 | 23.9298 | 0.541124   | -1.04919   | 0.29409   | 0.891156 |
| gene1819 | gene1819 | SACOL1860   | gi 57650036 ref NC_002951.2 :1912385-1912616 | q1 | q2 | OK     | 5.49928 | 12.7788 | 1.21644    | -0.96439   | 0.33485   | 0.904095 |
| gene182  | gene182  | ggt         | gi 57650036 ref NC_002951.2 :220340-222347   | q1 | q2 | OK     | 45.3488 | 63.5765 | 0.487429   | -0.8023    | 0.422382  | 0.939652 |
| gene1820 | gene1820 | hsdS        | gi 57650036 ref NC_002951.2 :1913465-1916214 | q1 | q2 | OK     | 34.2029 | 44.1993 | 0.369907   | -0.3755    | 0.707288  | 0.986963 |
| gene1821 | gene1821 | hsdM2       | gi 57650036 ref NC_002951.2 :1913465-1916214 | q1 | q2 | OK     | 45.8941 | 44.6505 | -0.039632  | 0.05036    | 0.959835  | 0.996932 |
| gene1822 | gene1822 | SACOL1863   | gi 57650036 ref NC_002951.2 :1916377-1916512 | q1 | q2 | OK     | 28.3219 | 0       | -1.79769e+ | -1.79769e+ | 0.201324  | 0.819847 |
| gene1823 | gene1823 | SACOL1864   | gi 57650036 ref NC_002951.2 :1916576-1917296 | q1 | q2 | OK     | 52.8884 | 73.591  | 0.476578   | -0.98218   | 0.326012  | 0.900129 |
| gene1824 | gene1824 | SACOL1865   | gi 57650036 ref NC_002951.2 :1917446-1918163 | q1 | q2 | OK     | 13.5055 | 23.018  | 0.769213   | -1.44868   | 0.147427  | 0.784907 |
| gene1825 | gene1825 | SACOL1866   | gi 57650036 ref NC_002951.2 :1918320-1919040 | q1 | q2 | OK     | 26.0244 | 42.5794 | 0.710289   | -1.43909   | 0.150124  | 0.788621 |
| gene1826 | gene1826 | spIC        | gi 57650036 ref NC_002951.2 :1919160-1919880 | q1 | q2 | OK     | 31.2713 | 40.6104 | 0.37701    | -0.76994   | 0.441338  | 0.946371 |
| gene1827 | gene1827 | spIB        | gi 57650036 ref NC_002951.2 :1919937-1920660 | q1 | q2 | OK     | 51.1407 | 73.9167 | 0.531428   | -1.09481   | 0.273598  | 0.879648 |

|          |          |             |                                              |    |    |        |         |         |            |           |           |          |
|----------|----------|-------------|----------------------------------------------|----|----|--------|---------|---------|------------|-----------|-----------|----------|
| gene1828 | gene1828 | splA        | gi 57650036 ref NC_002951.2 :1920784-1921501 | q1 | q2 | OK     | 51.9119 | 67.3215 | 0.375002   | -0.77525  | 0.438193  | 0.943657 |
| gene1829 | gene1829 | SACOL1870   | gi 57650036 ref NC_002951.2 :1922464-1923031 | q1 | q2 | OK     | 19.4705 | 25.1194 | 0.367513   | -0.68459  | 0.4936    | 0.964002 |
| gene183  | gene183  | SACOL0189   | gi 57650036 ref NC_002951.2 :222644-223418   | q1 | q2 | NOTEST | 0       | 0       | 0          | 0         | 1         | 1        |
| gene1830 | gene1830 | epiG        | gi 57650036 ref NC_002951.2 :1923504-1925650 | q1 | q2 | OK     | 63.9309 | 247.681 | 1.9539     | -1.20077  | 0.229841  | 0.86139  |
| gene1831 | gene1831 | epiE        | gi 57650036 ref NC_002951.2 :1923504-1925650 | q1 | q2 | OK     | 60.0612 | 161.851 | 1.43016    | -0.79561  | 0.426258  | 0.940178 |
| gene1832 | gene1832 | epiF        | gi 57650036 ref NC_002951.2 :1923504-1925650 | q1 | q2 | OK     | 120.278 | 401.416 | 1.73872    | -1.38628  | 0.165662  | 0.814226 |
| gene1833 | gene1833 | epiP        | gi 57650036 ref NC_002951.2 :1925672-1927046 | q1 | q2 | OK     | 38.4737 | 66.9398 | 0.798992   | -1.51472  | 0.129844  | 0.739318 |
| gene1834 | gene1834 | epiD        | gi 57650036 ref NC_002951.2 :1927055-1927574 | q1 | q2 | OK     | 18.8378 | 25.1654 | 0.417815   | -0.75986  | 0.447341  | 0.948742 |
| gene1835 | gene1835 | epiC        | gi 57650036 ref NC_002951.2 :1927589-1931820 | q1 | q2 | OK     | 17.2994 | 28.2595 | 0.708017   | -0.78964  | 0.429737  | 0.940178 |
| gene1836 | gene1836 | epiB        | gi 57650036 ref NC_002951.2 :1927589-1931820 | q1 | q2 | OK     | 13.2172 | 17.6879 | 0.420348   | -0.63075  | 0.528205  | 0.97289  |
| gene1837 | gene1837 | epiA        | gi 57650036 ref NC_002951.2 :1931884-1932028 | q1 | q2 | OK     | 18.2573 | 63.6852 | 1.80249    | -0.87227  | 0.383063  | 0.936672 |
| gene1838 | gene1838 | SACOL1879   | gi 57650036 ref NC_002951.2 :1932919-1934239 | q1 | q2 | OK     | 11.4509 | 11.6282 | 0.0221649  | -0.04372  | 0.965125  | 0.996932 |
| gene1839 | gene1839 | lukD        | gi 57650036 ref NC_002951.2 :1934670-1935654 | q1 | q2 | OK     | 57.0318 | 77.4032 | 0.440626   | -0.86631  | 0.386318  | 0.938503 |
| gene184  | gene184  | acpD        | gi 57650036 ref NC_002951.2 :223607-224234   | q1 | q2 | OK     | 119.692 | 78.8739 | -0.601702  | 1.2117    | 0.225627  | 0.857109 |
| gene1840 | gene1840 | lukE        | gi 57650036 ref NC_002951.2 :1935655-1936591 | q1 | q2 | OK     | 27.889  | 42.4842 | 0.607228   | -1.25311  | 0.210165  | 0.830641 |
| gene1841 | gene1841 | SACOL1882   | gi 57650036 ref NC_002951.2 :1937390-1937930 | q1 | q2 | OK     | 43.024  | 49.5936 | 0.205014   | -0.4144   | 0.678578  | 0.986963 |
| gene1842 | gene1842 | SACOL1883   | gi 57650036 ref NC_002951.2 :1937942-1938731 | q1 | q2 | OK     | 173.453 | 76.1223 | -1.18815   | 2.10536   | 0.0352598 | 0.436145 |
| gene1843 | gene1843 | SACOL_tRNA- | gi 57650036 ref NC_002951.2 :1939973-1940062 | q1 | q2 | NOTEST | 0       | 0       | 0          | 0         | 1         | 1        |
| gene1844 | gene1844 | SACOL_tRNA- | gi 57650036 ref NC_002951.2 :1940116-1940188 | q1 | q2 | NOTEST | 0       | 0       | 0          | 0         | 1         | 1        |
| gene1845 | gene1845 | SACOL_tRNA- | gi 57650036 ref NC_002951.2 :1940189-1940264 | q1 | q2 | NOTEST | 0       | 0       | 0          | 0         | 1         | 1        |
| gene1846 | gene1846 | SACOL_tRNA- | gi 57650036 ref NC_002951.2 :1940278-1940352 | q1 | q2 | NOTEST | 0       | 0       | 0          | 0         | 1         | 1        |
| gene1847 | gene1847 | SACOL_tRNA- | gi 57650036 ref NC_002951.2 :1940367-1940443 | q1 | q2 | NOTEST | 0       | 0       | 0          | 0         | 1         | 1        |
| gene1849 | gene1849 | SACOL_tRNA- | gi 57650036 ref NC_002951.2 :1940545-1940621 | q1 | q2 | NOTEST | 0       | 0       | 0          | 0         | 1         | 1        |
| gene185  | gene185  | SACOL0191   | gi 57650036 ref NC_002951.2 :224442-225021   | q1 | q2 | OK     | 80.3968 | 68.7388 | -0.226014  | 0.46806   | 0.639743  | 0.986963 |
| gene1850 | gene1850 | SACOL_tRNA- | gi 57650036 ref NC_002951.2 :1940642-1940716 | q1 | q2 | OK     | 36437   | 0       | -1.79769e+ | -1.79769e | 0.201324  | 0.819847 |
| gene1851 | gene1851 | SACOL1885   | gi 57650036 ref NC_002951.2 :1941187-1941742 | q1 | q2 | OK     | 44.3474 | 63.5794 | 0.519708   | -1.06288  | 0.287839  | 0.887342 |
| gene1852 | gene1852 | SACOL1886   | gi 57650036 ref NC_002951.2 :1941835-1942063 | q1 | q2 | OK     | 214.848 | 150.719 | -0.511451  | 0.96603   | 0.334027  | 0.903556 |
| gene1853 | gene1853 | hemG        | gi 57650036 ref NC_002951.2 :1942064-1943465 | q1 | q2 | OK     | 117.677 | 73.272  | -0.683498  | 1.05036   | 0.29355   | 0.891156 |
| gene1854 | gene1854 | hemH        | gi 57650036 ref NC_002951.2 :1943488-1944412 | q1 | q2 | OK     | 93.2673 | 63.3306 | -0.558469  | 1.07958   | 0.280327  | 0.879877 |
| gene1855 | gene1855 | hemE        | gi 57650036 ref NC_002951.2 :1944469-1945607 | q1 | q2 | OK     | 116.021 | 63.2393 | -0.875494  | 1.56167   | 0.118367  | 0.725355 |
| gene1856 | gene1856 | SACOL1890   | gi 57650036 ref NC_002951.2 :1944469-1945607 | q1 | q2 | OK     | 194.705 | 0       | -1.79769e+ | -1.79769e | 0.454875  | 0.950243 |
| gene1857 | gene1857 | SACOL1891   | gi 57650036 ref NC_002951.2 :1945769-1946273 | q1 | q2 | OK     | 139.154 | 70.3776 | -0.983498  | 2.00493   | 0.0449708 | 0.481552 |
| gene1858 | gene1858 | SACOL1892   | gi 57650036 ref NC_002951.2 :1946396-1948353 | q1 | q2 | OK     | 57.0958 | 104.777 | 0.875859   | -0.98128  | 0.326456  | 0.900129 |

|          |          |             |                                              |    |    |        |         |         |           |          |           |          |
|----------|----------|-------------|----------------------------------------------|----|----|--------|---------|---------|-----------|----------|-----------|----------|
| gene1859 | gene1859 | SACOL1893   | gi 57650036 ref NC_002951.2 :1946396-1948353 | q1 | q2 | OK     | 64.6932 | 127.197 | 0.975385  | -0.8722  | 0.383099  | 0.936672 |
| gene186  | gene186  | SACOL0192   | gi 57650036 ref NC_002951.2 :225403-226501   | q1 | q2 | OK     | 27.5049 | 36.2655 | 0.398913  | -0.8256  | 0.409032  | 0.939607 |
| gene1860 | gene1860 | SACOL1894   | gi 57650036 ref NC_002951.2 :1948486-1948909 | q1 | q2 | OK     | 115.246 | 83.0898 | -0.471969 | 0.97266  | 0.330721  | 0.900771 |
| gene1861 | gene1861 | SACOL1895   | gi 57650036 ref NC_002951.2 :1949050-1949416 | q1 | q2 | OK     | 654.434 | 781.029 | 0.255128  | -0.36742 | 0.713307  | 0.986963 |
| gene1862 | gene1862 | SACOL1896   | gi 57650036 ref NC_002951.2 :1950148-1950706 | q1 | q2 | OK     | 26.4626 | 31.3594 | 0.244944  | -0.47247 | 0.636595  | 0.986963 |
| gene1863 | gene1863 | SACOL1897   | gi 57650036 ref NC_002951.2 :1950910-1951873 | q1 | q2 | OK     | 83.5879 | 71.0122 | -0.235228 | 0.45296  | 0.650581  | 0.986963 |
| gene1864 | gene1864 | cbf1        | gi 57650036 ref NC_002951.2 :1951993-1957054 | q1 | q2 | OK     | 227.363 | 111.467 | -1.02838  | 0.47025  | 0.638179  | 0.986963 |
| gene1865 | gene1865 | SACOL1899   | gi 57650036 ref NC_002951.2 :1951993-1957054 | q1 | q2 | OK     | 136.272 | 89.1175 | -0.612711 | 0.44258  | 0.658069  | 0.986963 |
| gene1866 | gene1866 | SACOL1900   | gi 57650036 ref NC_002951.2 :1951993-1957054 | q1 | q2 | OK     | 106.845 | 90.7462 | -0.235604 | 0.09698  | 0.92274   | 0.996932 |
| gene1867 | gene1867 | SACOL1902   | gi 57650036 ref NC_002951.2 :1957825-1958170 | q1 | q2 | OK     | 336.704 | 245.893 | -0.453453 | 0.90269  | 0.366691  | 0.928011 |
| gene1868 | gene1868 | SACOL1903   | gi 57650036 ref NC_002951.2 :1958238-1959363 | q1 | q2 | OK     | 50.5531 | 39.4368 | -0.358258 | 0.72768  | 0.466809  | 0.954346 |
| gene1869 | gene1869 | SACOL1904   | gi 57650036 ref NC_002951.2 :1959541-1960006 | q1 | q2 | OK     | 37.5196 | 66.5149 | 0.826034  | -1.63847 | 0.101324  | 0.686047 |
| gene187  | gene187  | SACOL0193   | gi 57650036 ref NC_002951.2 :226513-227785   | q1 | q2 | OK     | 29.6637 | 42.0064 | 0.50191   | -1.02593 | 0.304924  | 0.892668 |
| gene1870 | gene1870 | SACOL1905   | gi 57650036 ref NC_002951.2 :1960361-1960985 | q1 | q2 | OK     | 47.0232 | 34.7606 | -0.43592  | 0.88499  | 0.376163  | 0.932533 |
| gene1871 | gene1871 | SACOL1906   | gi 57650036 ref NC_002951.2 :1961006-1962119 | q1 | q2 | OK     | 49.7262 | 37.3867 | -0.411481 | 0.83883  | 0.401564  | 0.939607 |
| gene1872 | gene1872 | SACOL1907   | gi 57650036 ref NC_002951.2 :1962281-1963103 | q1 | q2 | OK     | 108.904 | 45.0949 | -1.27202  | 2.48831  | 0.0128352 | 0.262026 |
| gene1873 | gene1873 | fumC        | gi 57650036 ref NC_002951.2 :1963565-1964951 | q1 | q2 | OK     | 262.29  | 94.4077 | -1.47418  | 1.81746  | 0.0691466 | 0.584603 |
| gene1874 | gene1874 | SACOL1909   | gi 57650036 ref NC_002951.2 :1965146-1965542 | q1 | q2 | OK     | 37.7218 | 34.0925 | -0.145946 | 0.26803  | 0.788679  | 0.986986 |
| gene1875 | gene1875 | SACOL1910   | gi 57650036 ref NC_002951.2 :1965660-1966023 | q1 | q2 | OK     | 25.0554 | 27.1265 | 0.114583  | -0.19245 | 0.847386  | 0.996923 |
| gene1876 | gene1876 | SACOL1911   | gi 57650036 ref NC_002951.2 :1966318-1966471 | q1 | q2 | OK     | 2572.42 | 3599.49 | 0.484665  | -0.99994 | 0.317338  | 0.892668 |
| gene1877 | gene1877 | SACOL1912   | gi 57650036 ref NC_002951.2 :1966495-1967095 | q1 | q2 | OK     | 919.07  | 1163.95 | 0.34078   | -0.33354 | 0.738726  | 0.986963 |
| gene1878 | gene1878 | SACOL1913   | gi 57650036 ref NC_002951.2 :1967253-1967724 | q1 | q2 | OK     | 137.135 | 61.4614 | -1.15784  | 2.35716  | 0.0184151 | 0.315668 |
| gene1879 | gene1879 | SACOL1914   | gi 57650036 ref NC_002951.2 :1967728-1968856 | q1 | q2 | OK     | 104.286 | 71.2086 | -0.550424 | 0.96551  | 0.334291  | 0.903556 |
| gene188  | gene188  | SACOL0194   | gi 57650036 ref NC_002951.2 :227787-229056   | q1 | q2 | OK     | 26.4864 | 36.7658 | 0.473113  | -0.97465 | 0.329734  | 0.900771 |
| gene1880 | gene1880 | SACOL1915   | gi 57650036 ref NC_002951.2 :1969006-1971179 | q1 | q2 | OK     | 230.041 | 40.9097 | -2.49138  | 1.68056  | 0.0928494 | 0.659737 |
| gene1881 | gene1881 | SACOL1916   | gi 57650036 ref NC_002951.2 :1969006-1971179 | q1 | q2 | OK     | 222.523 | 44.2797 | -2.32924  | 2.3799   | 0.0173174 | 0.308397 |
| gene1882 | gene1882 | SACOL1917   | gi 57650036 ref NC_002951.2 :1971436-1972498 | q1 | q2 | OK     | 132.582 | 102.422 | -0.372364 | 0.60228  | 0.546988  | 0.979019 |
| gene1883 | gene1883 | SACOL1918   | gi 57650036 ref NC_002951.2 :1972990-1974310 | q1 | q2 | OK     | 10.6473 | 13.2561 | 0.316168  | -0.62533 | 0.531758  | 0.97289  |
| gene1884 | gene1884 | SACOL_tRNA- | gi 57650036 ref NC_002951.2 :1974496-1974580 | q1 | q2 | NOTEST | 0       | 0       | 0         | 0        | 1         | 1        |
| gene1885 | gene1885 | SACOL_tRNA- | gi 57650036 ref NC_002951.2 :1974796-1974871 | q1 | q2 | NOTEST | 0       | 0       | 0         | 0        | 1         | 1        |
| gene1886 | gene1886 | SACOL_tRNA- | gi 57650036 ref NC_002951.2 :1974878-1974952 | q1 | q2 | NOTEST | 0       | 0       | 0         | 0        | 1         | 1        |
| gene1887 | gene1887 | SACOL_tRNA- | gi 57650036 ref NC_002951.2 :1974957-1975029 | q1 | q2 | NOTEST | 0       | 0       | 0         | 0        | 1         | 1        |
| gene1888 | gene1888 | SACOL_tRNA- | gi 57650036 ref NC_002951.2 :1975040-1975113 | q1 | q2 | NOTEST | 0       | 0       | 0         | 0        | 1         | 1        |

|          |          |             |                                              |    |    |        |         |         |           |          |           |          |
|----------|----------|-------------|----------------------------------------------|----|----|--------|---------|---------|-----------|----------|-----------|----------|
| gene1889 | gene1889 | SACOL_tRNA- | gi 57650036 ref NC_002951.2 :1975115-1975189 | q1 | q2 | NOTEST | 0       | 0       | 0         | 0        | 1         | 1        |
| gene189  | gene189  | SACOL0195   | gi 57650036 ref NC_002951.2 :229057-229897   | q1 | q2 | OK     | 25.6768 | 35.41   | 0.463691  | -0.9483  | 0.342976  | 0.905587 |
| gene1890 | gene1890 | SACOL_tRNA- | gi 57650036 ref NC_002951.2 :1975204-1975285 | q1 | q2 | NOTEST | 0       | 0       | 0         | 0        | 1         | 1        |
| gene1891 | gene1891 | SACOL_tRNA- | gi 57650036 ref NC_002951.2 :1975290-1975366 | q1 | q2 | NOTEST | 0       | 0       | 0         | 0        | 1         | 1        |
| gene1892 | gene1892 | SACOL_tRNA- | gi 57650036 ref NC_002951.2 :1975373-1975446 | q1 | q2 | NOTEST | 0       | 0       | 0         | 0        | 1         | 1        |
| gene1893 | gene1893 | SACOL_tRNA- | gi 57650036 ref NC_002951.2 :1975464-1975540 | q1 | q2 | NOTEST | 0       | 0       | 0         | 0        | 1         | 1        |
| gene1894 | gene1894 | SACOL_tRNA- | gi 57650036 ref NC_002951.2 :1975549-1975623 | q1 | q2 | NOTEST | 0       | 0       | 0         | 0        | 1         | 1        |
| gene1896 | gene1896 | SACOL_tRNA- | gi 57650036 ref NC_002951.2 :1975768-1975844 | q1 | q2 | NOTEST | 0       | 0       | 0         | 0        | 1         | 1        |
| gene1898 | gene1898 | SACOL_tRNA- | gi 57650036 ref NC_002951.2 :1975953-1976027 | q1 | q2 | NOTEST | 0       | 0       | 0         | 0        | 1         | 1        |
| gene19   | gene19   | SACOL_tRNA- | gi 57650036 ref NC_002951.2 :24259-24332     | q1 | q2 | NOTEST | 0       | 0       | 0         | 0        | 1         | 1        |
| gene190  | gene190  | SACOL0196   | gi 57650036 ref NC_002951.2 :229970-231047   | q1 | q2 | OK     | 59.8477 | 75.8608 | 0.342059  | -0.65787 | 0.510622  | 0.971029 |
| gene1905 | gene1905 | SACOL_tRNA- | gi 57650036 ref NC_002951.2 :1976595-1976677 | q1 | q2 | NOTEST | 0       | 0       | 0         | 0        | 1         | 1        |
| gene1906 | gene1906 | SACOL_tRNA- | gi 57650036 ref NC_002951.2 :1976680-1976756 | q1 | q2 | NOTEST | 0       | 0       | 0         | 0        | 1         | 1        |
| gene1907 | gene1907 | SACOL_tRNA- | gi 57650036 ref NC_002951.2 :1976761-1976837 | q1 | q2 | NOTEST | 0       | 0       | 0         | 0        | 1         | 1        |
| gene1908 | gene1908 | SACOL_tRNA- | gi 57650036 ref NC_002951.2 :1976853-1976929 | q1 | q2 | NOTEST | 0       | 0       | 0         | 0        | 1         | 1        |
| gene1909 | gene1909 | rrfD        | gi 57650036 ref NC_002951.2 :1976940-1977055 | q1 | q2 | OK     | 746455  | 351538  | -1.08637  | 1.1344   | 0.256626  | 0.875983 |
| gene191  | gene191  | SACOL0197   | gi 57650036 ref NC_002951.2 :231071-232112   | q1 | q2 | OK     | 50.1205 | 71.8008 | 0.518599  | -1.02376 | 0.305949  | 0.892668 |
| gene1910 | gene1910 | rrlD        | gi 57650036 ref NC_002951.2 :1977127-1980050 | q1 | q2 | OK     | 31959.1 | 24270.3 | -0.397032 | 0.97092  | 0.331587  | 0.900927 |
| gene1913 | gene1913 | rrsD        | gi 57650036 ref NC_002951.2 :1980523-1982078 | q1 | q2 | OK     | 9970.64 | 7944.53 | -0.327724 | 0.40798  | 0.68329   | 0.986963 |
| gene1914 | gene1914 | SACOL1919   | gi 57650036 ref NC_002951.2 :1982817-1983264 | q1 | q2 | OK     | 1289.67 | 456.784 | -1.49742  | 1.79348  | 0.0728966 | 0.602117 |
| gene1915 | gene1915 | SACOL1920   | gi 57650036 ref NC_002951.2 :1983360-1984311 | q1 | q2 | OK     | 115.182 | 119.112 | 0.0484018 | -0.08292 | 0.933914  | 0.996932 |
| gene1916 | gene1916 | bcp         | gi 57650036 ref NC_002951.2 :1984316-1984772 | q1 | q2 | OK     | 221.702 | 219.178 | -0.016518 | 0.03174  | 0.974681  | 0.998143 |
| gene1917 | gene1917 | hemL2       | gi 57650036 ref NC_002951.2 :1984852-1986142 | q1 | q2 | OK     | 139.852 | 135.795 | -0.042471 | 0.05796  | 0.953783  | 0.996932 |
| gene1918 | gene1918 | SACOL1923   | gi 57650036 ref NC_002951.2 :1986434-1987529 | q1 | q2 | OK     | 187.165 | 61.1728 | -1.61335  | 2.4678   | 0.0135946 | 0.270921 |
| gene1919 | gene1919 | SACOL1924   | gi 57650036 ref NC_002951.2 :1987719-1989456 | q1 | q2 | OK     | 94.0785 | 57.0925 | -0.720564 | 1.10316  | 0.269958  | 0.875983 |
| gene192  | gene192  | SACOL0198   | gi 57650036 ref NC_002951.2 :232166-233135   | q1 | q2 | OK     | 27.1718 | 30.4418 | 0.163943  | -0.3382  | 0.735215  | 0.986963 |
| gene1920 | gene1920 | SACOL1925   | gi 57650036 ref NC_002951.2 :1989746-1990289 | q1 | q2 | OK     | 136.077 | 48.8137 | -1.47906  | 2.97308  | 0.0029483 | 0.105384 |
| gene1921 | gene1921 | mutY        | gi 57650036 ref NC_002951.2 :1990590-1991628 | q1 | q2 | OK     | 40.8469 | 38.6548 | -0.079578 | 0.16438  | 0.869436  | 0.996923 |
| gene1922 | gene1922 | SACOL1927   | gi 57650036 ref NC_002951.2 :1991779-1992757 | q1 | q2 | OK     | 246.685 | 227.144 | -0.119063 | 0.1489   | 0.881636  | 0.996932 |
| gene1923 | gene1923 | SACOL1928   | gi 57650036 ref NC_002951.2 :1993017-1993854 | q1 | q2 | OK     | 59.8932 | 66.9002 | 0.159619  | -0.32534 | 0.744922  | 0.986963 |
| gene1924 | gene1924 | SACOL1929   | gi 57650036 ref NC_002951.2 :1993862-1995380 | q1 | q2 | OK     | 51.3348 | 52.8874 | 0.0429865 | -0.08017 | 0.936104  | 0.996932 |
| gene1925 | gene1925 | SACOL1930   | gi 57650036 ref NC_002951.2 :1995394-1996505 | q1 | q2 | OK     | 132.402 | 114.766 | -0.206224 | 0.20396  | 0.838388  | 0.996923 |
| gene1926 | gene1926 | recX        | gi 57650036 ref NC_002951.2 :1995394-1996505 | q1 | q2 | OK     | 58.3502 | 82.9252 | 0.507072  | -0.82192 | 0.411125  | 0.939607 |

|          |          |           |                                              |    |    |        |         |         |            |            |           |          |
|----------|----------|-----------|----------------------------------------------|----|----|--------|---------|---------|------------|------------|-----------|----------|
| gene1927 | gene1927 | SACOL1932 | gi 57650036 ref NC_002951.2 :1996765-1997575 | q1 | q2 | OK     | 175.705 | 57.9739 | -1.59968   | 2.82116    | 0.0047851 | 0.139714 |
| gene1928 | gene1928 | SACOL1933 | gi 57650036 ref NC_002951.2 :1997915-1998431 | q1 | q2 | OK     | 410.349 | 510.219 | 0.314263   | -0.42611   | 0.67003   | 0.986963 |
| gene1929 | gene1929 | SACOL1934 | gi 57650036 ref NC_002951.2 :1998561-1998723 | q1 | q2 | OK     | 72.857  | 30.4838 | -1.25703   | 0.94857    | 0.342838  | 0.905587 |
| gene193  | gene193  | SACOL0199 | gi 57650036 ref NC_002951.2 :233495-234068   | q1 | q2 | OK     | 27.4835 | 44.3845 | 0.69149    | -1.36742   | 0.171493  | 0.819812 |
| gene1930 | gene1930 | SACOL1935 | gi 57650036 ref NC_002951.2 :1998946-2000098 | q1 | q2 | OK     | 80.6858 | 50.2082 | -0.684392  | 1.29516    | 0.195264  | 0.819847 |
| gene1931 | gene1931 | SACOL1936 | gi 57650036 ref NC_002951.2 :2000357-2000888 | q1 | q2 | OK     | 175.099 | 130.225 | -0.42717   | 0.83893    | 0.401508  | 0.939607 |
| gene1932 | gene1932 | pepS      | gi 57650036 ref NC_002951.2 :2000977-2002234 | q1 | q2 | OK     | 105.627 | 72.5064 | -0.542794  | 0.90423    | 0.365874  | 0.92799  |
| gene1933 | gene1933 | SACOL1938 | gi 57650036 ref NC_002951.2 :2002236-2002443 | q1 | q2 | OK     | 47.3549 | 74.2839 | 0.649538   | -0.89065   | 0.373116  | 0.930383 |
| gene1934 | gene1934 | SACOL1939 | gi 57650036 ref NC_002951.2 :2002583-2003048 | q1 | q2 | OK     | 413.888 | 692.785 | 0.743169   | -1.00537   | 0.31472   | 0.892668 |
| gene1935 | gene1935 | SACOL1940 | gi 57650036 ref NC_002951.2 :2003054-2003330 | q1 | q2 | OK     | 198.931 | 228.016 | 0.196865   | -0.40489   | 0.685556  | 0.986963 |
| gene1936 | gene1936 | SACOL1941 | gi 57650036 ref NC_002951.2 :2003607-2004825 | q1 | q2 | OK     | 97.2104 | 152.391 | 0.648598   | -0.9543    | 0.33993   | 0.905587 |
| gene1937 | gene1937 | vraR      | gi 57650036 ref NC_002951.2 :2004940-2007301 | q1 | q2 | OK     | 80.5292 | 79.8231 | -0.012705  | 0.01211    | 0.990336  | 0.998143 |
| gene1938 | gene1938 | vraS      | gi 57650036 ref NC_002951.2 :2004940-2007301 | q1 | q2 | OK     | 45.3238 | 50.2083 | 0.14766    | -0.15039   | 0.880458  | 0.996932 |
| gene1939 | gene1939 | SACOL1944 | gi 57650036 ref NC_002951.2 :2004940-2007301 | q1 | q2 | OK     | 45.5628 | 56.0239 | 0.298188   | -0.24327   | 0.807794  | 0.9909   |
| gene194  | gene194  | uhpT      | gi 57650036 ref NC_002951.2 :234222-235602   | q1 | q2 | OK     | 106.161 | 60.4189 | -0.813188  | 1.32679    | 0.184578  | 0.819812 |
| gene1940 | gene1940 | SACOL1945 | gi 57650036 ref NC_002951.2 :2007315-2007702 | q1 | q2 | OK     | 28.1335 | 25.2385 | -0.156665  | 0.27068    | 0.786634  | 0.986986 |
| gene1941 | gene1941 | SACOL1946 | gi 57650036 ref NC_002951.2 :2007918-2008677 | q1 | q2 | OK     | 127.593 | 120.012 | -0.08837   | 0.16334    | 0.870249  | 0.996923 |
| gene1942 | gene1942 | SACOL1947 | gi 57650036 ref NC_002951.2 :2009204-2010191 | q1 | q2 | OK     | 21.9092 | 27.9519 | 0.351411   | -0.71938   | 0.471905  | 0.958312 |
| gene1943 | gene1943 | SACOL1948 | gi 57650036 ref NC_002951.2 :2010621-2011035 | q1 | q2 | OK     | 10.8621 | 14.2916 | 0.395857   | -0.59127   | 0.55434   | 0.981439 |
| gene1944 | gene1944 | SACOL1949 | gi 57650036 ref NC_002951.2 :2011063-2011174 | q1 | q2 | OK     | 0       | 408.502 | 1.79769e+3 | 1.79769e+0 | 0.18455   | 0.819812 |
| gene1945 | gene1945 | SACOL1950 | gi 57650036 ref NC_002951.2 :2011259-2011991 | q1 | q2 | OK     | 201.702 | 148.3   | -0.443704  | 0.73677    | 0.461264  | 0.950591 |
| gene1946 | gene1946 | SACOL1951 | gi 57650036 ref NC_002951.2 :2011992-2013306 | q1 | q2 | OK     | 93.4001 | 52.9551 | -0.818654  | 1.42846    | 0.15316   | 0.793468 |
| gene1947 | gene1947 | SACOL1952 | gi 57650036 ref NC_002951.2 :2013597-2014098 | q1 | q2 | OK     | 704.153 | 471.528 | -0.578546  | 0.72569    | 0.468029  | 0.954346 |
| gene1948 | gene1948 | SACOL1953 | gi 57650036 ref NC_002951.2 :2014179-2014272 | q1 | q2 | NOTEST | 0       | 0       | 0          | 0          | 1         | 1        |
| gene1949 | gene1949 | SACOL1954 | gi 57650036 ref NC_002951.2 :2014486-2015041 | q1 | q2 | OK     | 66.2215 | 47.2405 | -0.487275  | 0.99887    | 0.317856  | 0.892668 |
| gene195  | gene195  | SACOL0201 | gi 57650036 ref NC_002951.2 :235960-239233   | q1 | q2 | OK     | 25.2835 | 36.715  | 0.538178   | -0.30204   | 0.76262   | 0.986963 |
| gene1950 | gene1950 | dinP      | gi 57650036 ref NC_002951.2 :2015108-2016179 | q1 | q2 | OK     | 140.616 | 87.6877 | -0.681319  | 1.1061     | 0.268683  | 0.875983 |
| gene1951 | gene1951 | SACOL1956 | gi 57650036 ref NC_002951.2 :2016425-2016956 | q1 | q2 | OK     | 108.958 | 124.15  | 0.188317   | -0.38429   | 0.700762  | 0.986963 |
| gene1952 | gene1952 | SACOL1957 | gi 57650036 ref NC_002951.2 :2017125-2018487 | q1 | q2 | OK     | 41.768  | 44.632  | 0.0956802  | -0.1903    | 0.849076  | 0.996923 |
| gene1953 | gene1953 | SACOL1958 | gi 57650036 ref NC_002951.2 :2018567-2019515 | q1 | q2 | OK     | 92.7678 | 94.177  | 0.0217502  | -0.04022   | 0.967917  | 0.996932 |
| gene1954 | gene1954 | gatB      | gi 57650036 ref NC_002951.2 :2020283-2021711 | q1 | q2 | OK     | 136.549 | 80.4978 | -0.762395  | 1.10062    | 0.271063  | 0.875983 |
| gene1955 | gene1955 | gatA      | gi 57650036 ref NC_002951.2 :2021723-2023181 | q1 | q2 | OK     | 48.7918 | 48.4277 | -0.010806  | 0.02072    | 0.983466  | 0.998143 |
| gene1956 | gene1956 | gatC      | gi 57650036 ref NC_002951.2 :2023182-2023485 | q1 | q2 | OK     | 68.2408 | 86.6419 | 0.34443    | -0.65363   | 0.513349  | 0.971029 |

|          |          |           |                                              |    |    |    |         |         |            |            |           |          |
|----------|----------|-----------|----------------------------------------------|----|----|----|---------|---------|------------|------------|-----------|----------|
| gene1957 | gene1957 | SACOL1963 | gi 57650036 ref NC_002951.2 :2023852-2025391 | q1 | q2 | OK | 154.766 | 106.282 | -0.542185  | 0.69917    | 0.484444  | 0.963899 |
| gene1958 | gene1958 | camS      | gi 57650036 ref NC_002951.2 :2025479-2026679 | q1 | q2 | OK | 221.253 | 126.618 | -0.805216  | 1.04319    | 0.296859  | 0.892668 |
| gene1959 | gene1959 | ligA      | gi 57650036 ref NC_002951.2 :2026691-2028695 | q1 | q2 | OK | 118.566 | 61.4302 | -0.948668  | 1.27165    | 0.203498  | 0.821516 |
| gene196  | gene196  | SACOL0202 | gi 57650036 ref NC_002951.2 :235960-239233   | q1 | q2 | OK | 44.3948 | 53.9848 | 0.282161   | -0.30835   | 0.757816  | 0.986963 |
| gene1960 | gene1960 | pcrA      | gi 57650036 ref NC_002951.2 :2028698-2031580 | q1 | q2 | OK | 85.2747 | 60.5889 | -0.493064  | 0.57211    | 0.56725   | 0.985265 |
| gene1961 | gene1961 | SACOL1967 | gi 57650036 ref NC_002951.2 :2028698-2031580 | q1 | q2 | OK | 73.0496 | 53.3839 | -0.452472  | 0.24767    | 0.80439   | 0.989625 |
| gene1962 | gene1962 | SACOL1968 | gi 57650036 ref NC_002951.2 :2031751-2032054 | q1 | q2 | OK | 81.1979 | 98.706  | 0.281694   | -0.54574   | 0.585245  | 0.985265 |
| gene1963 | gene1963 | purB      | gi 57650036 ref NC_002951.2 :2032162-2033458 | q1 | q2 | OK | 79.812  | 88.8539 | 0.154829   | -0.26113   | 0.793989  | 0.987472 |
| gene1964 | gene1964 | sspB2     | gi 57650036 ref NC_002951.2 :2034318-2035485 | q1 | q2 | OK | 18.8835 | 30.4989 | 0.691631   | -1.42231   | 0.154936  | 0.797219 |
| gene1965 | gene1965 | SACOL1971 | gi 57650036 ref NC_002951.2 :2035515-2035842 | q1 | q2 | OK | 29.3038 | 32.038  | 0.128695   | -0.21378   | 0.830715  | 0.994686 |
| gene1966 | gene1966 | SACOL1972 | gi 57650036 ref NC_002951.2 :2036133-2036890 | q1 | q2 | OK | 49.8243 | 40.5441 | -0.297357  | 0.09177    | 0.926878  | 0.996932 |
| gene1967 | gene1967 | SACOL1973 | gi 57650036 ref NC_002951.2 :2036133-2036890 | q1 | q2 | OK | 75.149  | 66.0726 | -0.185701  | 0.37997    | 0.703966  | 0.986963 |
| gene1968 | gene1968 | nadE      | gi 57650036 ref NC_002951.2 :2037160-2039444 | q1 | q2 | OK | 114.747 | 107.152 | -0.098802  | 0.06804    | 0.945752  | 0.996932 |
| gene1969 | gene1969 | SACOL1975 | gi 57650036 ref NC_002951.2 :2037160-2039444 | q1 | q2 | OK | 113.656 | 108.178 | -0.071273  | 0.06946    | 0.944626  | 0.996932 |
| gene197  | gene197  | SACOL0203 | gi 57650036 ref NC_002951.2 :235960-239233   | q1 | q2 | OK | 46.9726 | 54.4926 | 0.21424    | -0.18011   | 0.857067  | 0.996923 |
| gene1970 | gene1970 | SACOL1976 | gi 57650036 ref NC_002951.2 :2039627-2040704 | q1 | q2 | OK | 39.856  | 38.3001 | -0.05745   | 0.11853    | 0.905646  | 0.996932 |
| gene1971 | gene1971 | pheA      | gi 57650036 ref NC_002951.2 :2040723-2041518 | q1 | q2 | OK | 45.9953 | 48.5951 | 0.0793256  | -0.16446   | 0.869367  | 0.996923 |
| gene1972 | gene1972 | SACOL1978 | gi 57650036 ref NC_002951.2 :2041542-2041665 | q1 | q2 | OK | 0       | 112.732 | 1.79769e+3 | 1.79769e+0 | 0.18455   | 0.819812 |
| gene1973 | gene1973 | SACOL1979 | gi 57650036 ref NC_002951.2 :2041707-2043270 | q1 | q2 | OK | 118.181 | 96.6736 | -0.289801  | 0.40103    | 0.6884    | 0.986963 |
| gene1974 | gene1974 | SACOL1980 | gi 57650036 ref NC_002951.2 :2043474-2044572 | q1 | q2 | OK | 59.8635 | 69.3524 | 0.212269   | -0.41083   | 0.681198  | 0.986963 |
| gene1975 | gene1975 | SACOL1981 | gi 57650036 ref NC_002951.2 :2044943-2045504 | q1 | q2 | OK | 262.009 | 165.691 | -0.661123  | 1.16073    | 0.245753  | 0.869586 |
| gene1976 | gene1976 | ppaC      | gi 57650036 ref NC_002951.2 :2045556-2046486 | q1 | q2 | OK | 289.143 | 111.487 | -1.3749    | 1.91261    | 0.0557982 | 0.538882 |
| gene1977 | gene1977 | SACOL1983 | gi 57650036 ref NC_002951.2 :2046680-2046854 | q1 | q2 | OK | 24.9122 | 81.0882 | 1.70264    | -1.55274   | 0.120485  | 0.725365 |
| gene1978 | gene1978 | aldA2     | gi 57650036 ref NC_002951.2 :2046905-2048285 | q1 | q2 | OK | 224.352 | 306.623 | 0.450702   | -0.47572   | 0.634272  | 0.986963 |
| gene1979 | gene1979 | SACOL1985 | gi 57650036 ref NC_002951.2 :2048404-2049433 | q1 | q2 | OK | 87.5235 | 113.135 | 0.370302   | -0.64717   | 0.517525  | 0.971416 |
| gene198  | gene198  | pflB      | gi 57650036 ref NC_002951.2 :239820-242070   | q1 | q2 | OK | 83.4386 | 60.7735 | -0.457272  | 0.63266    | 0.526956  | 0.97289  |
| gene1980 | gene1980 | SACOL1986 | gi 57650036 ref NC_002951.2 :2049702-2050104 | q1 | q2 | OK | 37.7427 | 80.1883 | 1.08719    | -2.11374   | 0.0345377 | 0.435799 |
| gene1981 | gene1981 | SACOL1987 | gi 57650036 ref NC_002951.2 :2050676-2050850 | q1 | q2 | OK | 62.2804 | 222.993 | 1.84015    | -2.33492   | 0.0195478 | 0.325064 |
| gene1982 | gene1982 | SACOL1988 | gi 57650036 ref NC_002951.2 :2051300-2052341 | q1 | q2 | OK | 62.054  | 66.0999 | 0.0911241  | -0.17889   | 0.858027  | 0.996923 |
| gene1983 | gene1983 | SACOL1989 | gi 57650036 ref NC_002951.2 :2052397-2053794 | q1 | q2 | OK | 79.6039 | 85.7194 | 0.106782   | -0.15764   | 0.87474   | 0.996932 |
| gene1984 | gene1984 | SACOL1990 | gi 57650036 ref NC_002951.2 :2052397-2053794 | q1 | q2 | OK | 60.9532 | 73.2894 | 0.265904   | -0.26733   | 0.789215  | 0.986986 |
| gene1985 | gene1985 | SACOL1991 | gi 57650036 ref NC_002951.2 :2053853-2054378 | q1 | q2 | OK | 45.4879 | 101.215 | 1.15388    | -2.35317   | 0.0186144 | 0.315668 |
| gene1986 | gene1986 | SACOL1992 | gi 57650036 ref NC_002951.2 :2054498-2055062 | q1 | q2 | OK | 205.262 | 155.37  | -0.401755  | 0.74601    | 0.455661  | 0.950521 |

|          |          |           |                                              |    |    |        |         |         |           |          |           |           |
|----------|----------|-----------|----------------------------------------------|----|----|--------|---------|---------|-----------|----------|-----------|-----------|
| gene1987 | gene1987 | SACOL1993 | gi 57650036 ref NC_002951.2 :2055127-2057417 | q1 | q2 | OK     | 35.5812 | 64.9015 | 0.867135  | -0.8941  | 0.37127   | 0.929271  |
| gene1988 | gene1988 | SACOL1994 | gi 57650036 ref NC_002951.2 :2055127-2057417 | q1 | q2 | OK     | 45.9891 | 67.6261 | 0.556289  | -0.68091 | 0.49593   | 0.964002  |
| gene1989 | gene1989 | SACOL1995 | gi 57650036 ref NC_002951.2 :2055127-2057417 | q1 | q2 | OK     | 20.3282 | 36.0924 | 0.828214  | -0.60564 | 0.544753  | 0.979019  |
| gene199  | gene199  | pflA      | gi 57650036 ref NC_002951.2 :242092-242848   | q1 | q2 | OK     | 90.028  | 89.9612 | -0.001071 | 0.00212  | 0.998305  | 0.998702  |
| gene1990 | gene1990 | SACOL1996 | gi 57650036 ref NC_002951.2 :2057417-2058691 | q1 | q2 | OK     | 36.8486 | 50.5429 | 0.455899  | -0.76733 | 0.442885  | 0.947261  |
| gene1991 | gene1991 | SACOL1997 | gi 57650036 ref NC_002951.2 :2057417-2058691 | q1 | q2 | OK     | 57.8611 | 76.6701 | 0.406071  | -0.45232 | 0.651042  | 0.986963  |
| gene1992 | gene1992 | SACOL1998 | gi 57650036 ref NC_002951.2 :2058954-2059131 | q1 | q2 | OK     | 85.7791 | 46.2212 | -0.892072 | 0.94648  | 0.343903  | 0.906464  |
| gene1993 | gene1993 | SACOL1999 | gi 57650036 ref NC_002951.2 :2059373-2059472 | q1 | q2 | NOTEST | 0       | 0       | 0         | 0        | 1         | 1         |
| gene1994 | gene1994 | SACOL2000 | gi 57650036 ref NC_002951.2 :2059671-2060958 | q1 | q2 | OK     | 209.72  | 109.937 | -0.93179  | 1.21203  | 0.225502  | 0.857109  |
| gene1995 | gene1995 | map       | gi 57650036 ref NC_002951.2 :2061281-2063337 | q1 | q2 | OK     | 24.628  | 39.2519 | 0.672465  | -1.29228 | 0.19626   | 0.819847  |
| gene1996 | gene1996 | h1b       | gi 57650036 ref NC_002951.2 :2063725-2064718 | q1 | q2 | OK     | 70.0198 | 108.532 | 0.632284  | -1.15827 | 0.246755  | 0.869586  |
| gene1997 | gene1997 | SACOL2004 | gi 57650036 ref NC_002951.2 :2064955-2065828 | q1 | q2 | OK     | 29.0717 | 40.9971 | 0.495909  | -1.02281 | 0.306396  | 0.892668  |
| gene1998 | gene1998 | SACOL2006 | gi 57650036 ref NC_002951.2 :2065993-2067049 | q1 | q2 | OK     | 23.2025 | 40.2811 | 0.795823  | -1.63775 | 0.101474  | 0.686047  |
| gene1999 | gene1999 | SACOL2007 | gi 57650036 ref NC_002951.2 :2067483-2068708 | q1 | q2 | OK     | 67.0049 | 108.736 | 0.698494  | -1.18145 | 0.237425  | 0.863102  |
| gene2    | gene2    | SACOL0003 | gi 57650036 ref NC_002951.2 :3696-5051       | q1 | q2 | OK     | 1057.41 | 437.43  | -1.27342  | 0.58033  | 0.561695  | 0.98493   |
| gene20   | gene20   | yycF      | gi 57650036 ref NC_002951.2 :24951-25653     | q1 | q2 | OK     | 235.842 | 243.45  | 0.0458047 | -0.06825 | 0.945589  | 0.996932  |
| gene200  | gene200  | SACOL0206 | gi 57650036 ref NC_002951.2 :242951-243146   | q1 | q2 | OK     | 3.64339 | 5.62445 | 0.626431  | -0.26586 | 0.790345  | 0.986986  |
| gene2000 | gene2000 | SACOL2009 | gi 57650036 ref NC_002951.2 :2069079-2069925 | q1 | q2 | OK     | 20.8375 | 29.906  | 0.521248  | -1.0512  | 0.293165  | 0.891156  |
| gene2001 | gene2001 | SACOL2010 | gi 57650036 ref NC_002951.2 :2069986-2070898 | q1 | q2 | OK     | 33.7701 | 61.1086 | 0.85563   | -1.75198 | 0.0797771 | 0.628579  |
| gene2002 | gene2002 | SACOL2011 | gi 57650036 ref NC_002951.2 :2071058-2072366 | q1 | q2 | OK     | 36.8464 | 32.4361 | -0.183923 | 0.37683  | 0.706297  | 0.986963  |
| gene2003 | gene2003 | SACOL2012 | gi 57650036 ref NC_002951.2 :2073218-2073662 | q1 | q2 | OK     | 54.6911 | 36.9419 | -0.566046 | 1.10132  | 0.270757  | 0.875983  |
| gene2004 | gene2004 | SACOL2013 | gi 57650036 ref NC_002951.2 :2073767-2074205 | q1 | q2 | OK     | 47.3102 | 41.4356 | -0.191282 | 0.37136  | 0.710372  | 0.986963  |
| gene2005 | gene2005 | SACOL2014 | gi 57650036 ref NC_002951.2 :2074522-2075113 | q1 | q2 | OK     | 55.0876 | 61.5367 | 0.159719  | -0.33022 | 0.741232  | 0.986963  |
| gene2006 | gene2006 | SACOL2015 | gi 57650036 ref NC_002951.2 :2075454-2075929 | q1 | q2 | OK     | 18.9023 | 31.215  | 0.723678  | -1.3061  | 0.19152   | 0.819847  |
| gene2007 | gene2007 | groEL     | gi 57650036 ref NC_002951.2 :2076023-2077640 | q1 | q2 | OK     | 74.4912 | 107.049 | 0.523131  | -0.76739 | 0.442848  | 0.947261  |
| gene2008 | gene2008 | groES     | gi 57650036 ref NC_002951.2 :2077715-2078000 | q1 | q2 | OK     | 33.9187 | 61.7583 | 0.864552  | -1.45202 | 0.146496  | 0.783746  |
| gene2009 | gene2009 | SACOL2018 | gi 57650036 ref NC_002951.2 :2078174-2078918 | q1 | q2 | OK     | 44.4455 | 43.1149 | -0.043849 | 0.09074  | 0.927697  | 0.996932  |
| gene201  | gene201  | SACOL0207 | gi 57650036 ref NC_002951.2 :243183-244947   | q1 | q2 | OK     | 27.7602 | 34.9586 | 0.332627  | -0.66358 | 0.506959  | 0.969895  |
| gene2010 | gene2010 | SACOL2019 | gi 57650036 ref NC_002951.2 :2078942-2080202 | q1 | q2 | OK     | 153.235 | 194.572 | 0.34455   | -0.43302 | 0.665002  | 0.986963  |
| gene2011 | gene2011 | SACOL2020 | gi 57650036 ref NC_002951.2 :2080398-2081025 | q1 | q2 | OK     | 247.464 | 123.817 | -0.999005 | 1.72811  | 0.0839694 | 0.638501  |
| gene2012 | gene2012 | SACOL2021 | gi 57650036 ref NC_002951.2 :2081385-2082171 | q1 | q2 | OK     | 178.232 | 66.6368 | -1.41937  | 2.51329  | 0.011961  | 0.249708  |
| gene2013 | gene2013 | h1d       | gi 57650036 ref NC_002951.2 :2082767-2082902 | q1 | q2 | OK     | 2039.17 | 101.074 | -4.3345   | 3.60698  | 0.0003098 | 0.0268229 |
| gene2014 | gene2014 | agrB      | gi 57650036 ref NC_002951.2 :2083137-2083844 | q1 | q2 | OK     | 1175.06 | 659.656 | -0.83295  | 0.82805  | 0.407642  | 0.939607  |

|          |          |             |                                              |    |    |        |         |         |           |          |           |          |
|----------|----------|-------------|----------------------------------------------|----|----|--------|---------|---------|-----------|----------|-----------|----------|
| gene2015 | gene2015 | agrD        | gi 57650036 ref NC_002951.2 :2083137-2083844 | q1 | q2 | OK     | 607.359 | 331.018 | -0.875641 | 0.06888  | 0.945083  | 0.996932 |
| gene2016 | gene2016 | argC2       | gi 57650036 ref NC_002951.2 :2083868-2085161 | q1 | q2 | OK     | 590.108 | 277.168 | -1.09022  | 1.07445  | 0.282621  | 0.880646 |
| gene2017 | gene2017 | agrA        | gi 57650036 ref NC_002951.2 :2085179-2085896 | q1 | q2 | OK     | 1162.11 | 413.582 | -1.4905   | 1.53793  | 0.124067  | 0.732386 |
| gene2018 | gene2018 | SACOL2028   | gi 57650036 ref NC_002951.2 :2086262-2088703 | q1 | q2 | OK     | 133.605 | 92.0426 | -0.537599 | 0.38523  | 0.700069  | 0.986963 |
| gene2019 | gene2019 | cscA        | gi 57650036 ref NC_002951.2 :2086262-2088703 | q1 | q2 | OK     | 124.572 | 96.066  | -0.374879 | 0.34369  | 0.731078  | 0.986963 |
| gene202  | gene202  | SACOL0208   | gi 57650036 ref NC_002951.2 :245110-245455   | q1 | q2 | OK     | 34.8542 | 16.2843 | -1.09785  | 1.73797  | 0.0822169 | 0.630349 |
| gene2020 | gene2020 | scrR        | gi 57650036 ref NC_002951.2 :2088851-2089802 | q1 | q2 | OK     | 84.871  | 82.7931 | -0.035761 | 0.06792  | 0.945846  | 0.996932 |
| gene2021 | gene2021 | SACOL2031   | gi 57650036 ref NC_002951.2 :2089984-2091235 | q1 | q2 | OK     | 37.1851 | 51.8689 | 0.480147  | -0.96187 | 0.336115  | 0.905562 |
| gene2022 | gene2022 | SACOL2033   | gi 57650036 ref NC_002951.2 :2091441-2091666 | q1 | q2 | OK     | 58.3173 | 25.561  | -1.18998  | 1.53937  | 0.123714  | 0.732386 |
| gene2023 | gene2023 | SACOL2034   | gi 57650036 ref NC_002951.2 :2091725-2092805 | q1 | q2 | OK     | 74.7536 | 82.092  | 0.135099  | -0.25101 | 0.801809  | 0.989625 |
| gene2024 | gene2024 | SACOL2035   | gi 57650036 ref NC_002951.2 :2093108-2093744 | q1 | q2 | OK     | 223.623 | 156.658 | -0.513451 | 0.88613  | 0.375546  | 0.932533 |
| gene2025 | gene2025 | SACOL2036   | gi 57650036 ref NC_002951.2 :2093996-2095925 | q1 | q2 | OK     | 56.292  | 58.9945 | 0.0676499 | -0.11102 | 0.911602  | 0.996932 |
| gene2026 | gene2026 | SACOL2037   | gi 57650036 ref NC_002951.2 :2096286-2097897 | q1 | q2 | OK     | 25.6553 | 34.8144 | 0.440429  | -0.89286 | 0.37193   | 0.929271 |
| gene2027 | gene2027 | SACOL2038   | gi 57650036 ref NC_002951.2 :2097998-2100531 | q1 | q2 | OK     | 64.6245 | 70.2551 | 0.120523  | -0.13612 | 0.891727  | 0.996932 |
| gene2028 | gene2028 | SACOL2039   | gi 57650036 ref NC_002951.2 :2097998-2100531 | q1 | q2 | OK     | 70.74   | 71.199  | 0.0093313 | -0.00631 | 0.994962  | 0.998143 |
| gene2029 | gene2029 | SACOL2040   | gi 57650036 ref NC_002951.2 :2097998-2100531 | q1 | q2 | OK     | 38.3929 | 40.1982 | 0.0662931 | -0.0433  | 0.96546   | 0.996932 |
| gene203  | gene203  | SACOL0209   | gi 57650036 ref NC_002951.2 :245644-247555   | q1 | q2 | OK     | 11.8791 | 6.81026 | -0.802646 | 1.60319  | 0.108893  | 0.712055 |
| gene2030 | gene2030 | SACOL2041   | gi 57650036 ref NC_002951.2 :2097998-2100531 | q1 | q2 | OK     | 68.2868 | 40.8799 | -0.740214 | 0.40307  | 0.686896  | 0.986963 |
| gene2031 | gene2031 | ilvD        | gi 57650036 ref NC_002951.2 :2101068-2102757 | q1 | q2 | OK     | 49.7419 | 42.6693 | -0.221261 | 0.41227  | 0.680142  | 0.986963 |
| gene2032 | gene2032 | ilvB        | gi 57650036 ref NC_002951.2 :2102784-2104808 | q1 | q2 | OK     | 45.9251 | 51.5731 | 0.167336  | -0.29674 | 0.766666  | 0.986963 |
| gene2033 | gene2033 | SACOL2044   | gi 57650036 ref NC_002951.2 :2102784-2104808 | q1 | q2 | OK     | 17.438  | 30.4904 | 0.806117  | -0.21943 | 0.826319  | 0.992769 |
| gene2034 | gene2034 | ilvC        | gi 57650036 ref NC_002951.2 :2104944-2105949 | q1 | q2 | OK     | 67.6314 | 84.9152 | 0.32833   | -0.62689 | 0.530734  | 0.97289  |
| gene2035 | gene2035 | leuA        | gi 57650036 ref NC_002951.2 :2105978-2107508 | q1 | q2 | OK     | 45.1908 | 61.1524 | 0.436381  | -0.80495 | 0.42085   | 0.939652 |
| gene2036 | gene2036 | leuB        | gi 57650036 ref NC_002951.2 :2107510-2108557 | q1 | q2 | OK     | 28.7079 | 41.0065 | 0.514406  | -1.06303 | 0.28777   | 0.887342 |
| gene2037 | gene2037 | leuC        | gi 57650036 ref NC_002951.2 :2108570-2109941 | q1 | q2 | OK     | 32.7025 | 43.0698 | 0.397276  | -0.80202 | 0.422543  | 0.939652 |
| gene2038 | gene2038 | leuD        | gi 57650036 ref NC_002951.2 :2109941-2110514 | q1 | q2 | OK     | 30.3463 | 35.5753 | 0.229355  | -0.4517  | 0.651482  | 0.986963 |
| gene2039 | gene2039 | ilvA2       | gi 57650036 ref NC_002951.2 :2110528-2111797 | q1 | q2 | OK     | 28.063  | 33.844  | 0.270233  | -0.55813 | 0.576755  | 0.985265 |
| gene204  | gene204  | SACOL0210   | gi 57650036 ref NC_002951.2 :248020-249342   | q1 | q2 | NOTEST | 0       | 0       | 0         | 0        | 1         | 1        |
| gene2040 | gene2040 | rrfE        | gi 57650036 ref NC_002951.2 :2112006-2112121 | q1 | q2 | OK     | 493863  | 244297  | -1.01547  | 1.15448  | 0.248305  | 0.869586 |
| gene2041 | gene2041 | rrlE        | gi 57650036 ref NC_002951.2 :2112193-2115116 | q1 | q2 | OK     | 33281.4 | 23940.7 | -0.475247 | 1.16796  | 0.242824  | 0.867572 |
| gene2042 | gene2042 | rrsE        | gi 57650036 ref NC_002951.2 :2115662-2117217 | q1 | q2 | OK     | 11801.5 | 9749.73 | -0.275541 | 0.35983  | 0.718975  | 0.986963 |
| gene2043 | gene2043 | SACOL_tRNA- | gi 57650036 ref NC_002951.2 :2117334-2117408 | q1 | q2 | NOTEST | 0       | 0       | 0         | 0        | 1         | 1        |
| gene2044 | gene2044 | SACOL_tRNA- | gi 57650036 ref NC_002951.2 :2117427-2117513 | q1 | q2 | NOTEST | 0       | 0       | 0         | 0        | 1         | 1        |



|          |          |           |                                              |    |    |        |         |         |              |              |           |           |
|----------|----------|-----------|----------------------------------------------|----|----|--------|---------|---------|--------------|--------------|-----------|-----------|
| gene2045 | gene2045 | SACOL2052 | gi 57650036 ref NC_002951.2 :2118159-2120758 | q1 | q2 | OK     | 76.185  | 41.1262 | -0.889449    | 0.45183      | 0.651395  | 0.986963  |
| gene2046 | gene2046 | SACOL2053 | gi 57650036 ref NC_002951.2 :2118159-2120758 | q1 | q2 | OK     | 69.5255 | 48.511  | -0.519233    | 0.70722      | 0.479432  | 0.960423  |
| gene2047 | gene2047 | rpoF      | gi 57650036 ref NC_002951.2 :2121191-2122416 | q1 | q2 | OK     | 410.49  | 294.248 | -0.480314    | 0.49048      | 0.623793  | 0.986963  |
| gene2048 | gene2048 | rsbW      | gi 57650036 ref NC_002951.2 :2121191-2122416 | q1 | q2 | OK     | 173.707 | 130.767 | -0.409662    | 0.19674      | 0.84403   | 0.996923  |
| gene2049 | gene2049 | rsbV      | gi 57650036 ref NC_002951.2 :2122417-2122744 | q1 | q2 | OK     | 345.053 | 264.543 | -0.383317    | 0.77055      | 0.440975  | 0.946371  |
| gene205  | gene205  | SACOL0211 | gi 57650036 ref NC_002951.2 :248020-249342   | q1 | q2 | OK     | 414.789 | 108.062 | -1.94052     | 2.28167      | 0.0225087 | 0.342403  |
| gene2050 | gene2050 | rsbU      | gi 57650036 ref NC_002951.2 :2122863-2123865 | q1 | q2 | OK     | 128.671 | 57.6245 | -1.15893     | 2.0531       | 0.040063  | 0.459353  |
| gene2051 | gene2051 | SACOL2058 | gi 57650036 ref NC_002951.2 :2124214-2124744 | q1 | q2 | OK     | 346.599 | 116.571 | -1.57206     | 3.04757      | 0.002307  | 0.0958946 |
| gene2052 | gene2052 | SACOL2059 | gi 57650036 ref NC_002951.2 :2124214-2124744 | q1 | q2 | OK     | 102.134 | 22.3129 | -2.19452     | 0.56236      | 0.573872  | 0.985265  |
| gene2053 | gene2053 | alr       | gi 57650036 ref NC_002951.2 :2124828-2125977 | q1 | q2 | OK     | 115.382 | 80.1993 | -0.524762    | 0.87839      | 0.379734  | 0.932987  |
| gene2054 | gene2054 | acpS      | gi 57650036 ref NC_002951.2 :2126042-2126402 | q1 | q2 | OK     | 116.946 | 82.753  | -0.498953    | 1.01167      | 0.311696  | 0.892668  |
| gene2055 | gene2055 | SACOL2062 | gi 57650036 ref NC_002951.2 :2126405-2128939 | q1 | q2 | OK     | 95.096  | 63.5136 | -0.58232     | 0.31398      | 0.75354   | 0.986963  |
| gene2056 | gene2056 | SACOL2063 | gi 57650036 ref NC_002951.2 :2126405-2128939 | q1 | q2 | OK     | 88.4024 | 73.7073 | -0.262279    | 0.30235      | 0.762383  | 0.986963  |
| gene2057 | gene2057 | SACOL2064 | gi 57650036 ref NC_002951.2 :2126405-2128939 | q1 | q2 | OK     | 53.1908 | 62.7146 | 0.237625     | -0.1063      | 0.915346  | 0.996932  |
| gene2058 | gene2058 | SACOL2065 | gi 57650036 ref NC_002951.2 :2129034-2129708 | q1 | q2 | NOTEST | 0       | 0       | 0            | 0            | 1         | 1         |
| gene2059 | gene2059 | kdpC      | gi 57650036 ref NC_002951.2 :2129034-2129708 | q1 | q2 | OK     | 53.4051 | 44.394  | -0.266612    | 0.54147      | 0.588181  | 0.985265  |
| gene206  | gene206  | SACOL0212 | gi 57650036 ref NC_002951.2 :249371-251633   | q1 | q2 | OK     | 345.759 | 86.9452 | -1.99159     | 2.0964       | 0.0360471 | 0.441533  |
| gene2060 | gene2060 | kdpB      | gi 57650036 ref NC_002951.2 :2129727-2131755 | q1 | q2 | OK     | 53.8535 | 63.928  | 0.247408     | -0.39292     | 0.694382  | 0.986963  |
| gene2061 | gene2061 | kdpA      | gi 57650036 ref NC_002951.2 :2131773-2133450 | q1 | q2 | OK     | 36.1851 | 52.2162 | 0.529103     | -0.99611     | 0.319196  | 0.892668  |
| gene2062 | gene2062 | kdpF      | gi 57650036 ref NC_002951.2 :2133473-2133584 | q1 | q2 | OK     | 194.705 | 0       | -1.79769e+01 | -1.79769e+01 | 0.201324  | 0.819847  |
| gene2063 | gene2063 | kdpD      | gi 57650036 ref NC_002951.2 :2133721-2137074 | q1 | q2 | OK     | 27.263  | 34.3541 | 0.333537     | -0.48777     | 0.625712  | 0.986963  |
| gene2064 | gene2064 | kdpE      | gi 57650036 ref NC_002951.2 :2133721-2137074 | q1 | q2 | OK     | 36.8654 | 47.1464 | 0.354881     | -0.27722     | 0.781612  | 0.986963  |
| gene2065 | gene2065 | SACOL2072 | gi 57650036 ref NC_002951.2 :2137442-2138963 | q1 | q2 | OK     | 216.427 | 65.2199 | -1.7305      | 2.24143      | 0.0249982 | 0.367079  |
| gene2066 | gene2066 | murF      | gi 57650036 ref NC_002951.2 :2139479-2140838 | q1 | q2 | OK     | 180.998 | 110.853 | -0.707327    | 0.92593      | 0.354485  | 0.914747  |
| gene2067 | gene2067 | ddl       | gi 57650036 ref NC_002951.2 :2140852-2141923 | q1 | q2 | OK     | 164.843 | 104.213 | -0.661559    | 1.00426      | 0.315252  | 0.892668  |
| gene2068 | gene2068 | ftsW      | gi 57650036 ref NC_002951.2 :2142240-2143443 | q1 | q2 | OK     | 87.9985 | 92.8049 | 0.0767218    | -0.1303      | 0.896328  | 0.996932  |
| gene2069 | gene2069 | SACOL2076 | gi 57650036 ref NC_002951.2 :2143706-2143844 | q1 | q2 | OK     | 6057.05 | 11359.1 | 0.907165     | -1.87658     | 0.0605754 | 0.549115  |
| gene207  | gene207  | SACOL0213 | gi 57650036 ref NC_002951.2 :251818-253030   | q1 | q2 | OK     | 443.622 | 113.322 | -1.96891     | 2.28437      | 0.0223498 | 0.342403  |
| gene2070 | gene2070 | SACOL2077 | gi 57650036 ref NC_002951.2 :2143971-2144181 | q1 | q2 | OK     | 107.547 | 92.4205 | -0.218677    | 0.34774      | 0.728033  | 0.986963  |
| gene2071 | gene2071 | SACOL2078 | gi 57650036 ref NC_002951.2 :2144192-2144486 | q1 | q2 | OK     | 35.1855 | 18.949  | -0.892857    | 1.32549      | 0.185009  | 0.819812  |
| gene2072 | gene2072 | cls2      | gi 57650036 ref NC_002951.2 :2144651-2146136 | q1 | q2 | OK     | 58.8597 | 64.1794 | 0.12483      | -0.22322     | 0.823363  | 0.992727  |
| gene2073 | gene2073 | SACOL2080 | gi 57650036 ref NC_002951.2 :2146163-2146811 | q1 | q2 | OK     | 41.2858 | 49.4517 | 0.260374     | -0.53523     | 0.592492  | 0.985916  |
| gene2074 | gene2074 | SACOL2081 | gi 57650036 ref NC_002951.2 :2146985-2147078 | q1 | q2 | NOTEST | 0       | 0       | 0            | 0            | 1         | 1         |

|          |          |           |                                              |    |    |    |         |         |           |          |           |          |
|----------|----------|-----------|----------------------------------------------|----|----|----|---------|---------|-----------|----------|-----------|----------|
| gene2075 | gene2075 | SACOL2082 | gi 57650036 ref NC_002951.2 :2147623-2148496 | q1 | q2 | OK | 266.737 | 138.126 | -0.949433 | 1.35101  | 0.176691  | 0.819812 |
| gene2076 | gene2076 | thiE      | gi 57650036 ref NC_002951.2 :2148581-2149223 | q1 | q2 | OK | 28.1177 | 31.383  | 0.158506  | -0.3143  | 0.753295  | 0.986963 |
| gene2077 | gene2077 | thiM      | gi 57650036 ref NC_002951.2 :2149224-2151512 | q1 | q2 | OK | 29.512  | 30.8199 | 0.0625627 | -0.04943 | 0.960576  | 0.996932 |
| gene2078 | gene2078 | thiD2     | gi 57650036 ref NC_002951.2 :2149224-2151512 | q1 | q2 | OK | 77.2046 | 81.7983 | 0.0833838 | -0.11027 | 0.912195  | 0.996932 |
| gene2079 | gene2079 | SACOL2086 | gi 57650036 ref NC_002951.2 :2149224-2151512 | q1 | q2 | OK | 37.5121 | 33.1061 | -0.180262 | 0.14046  | 0.888294  | 0.996932 |
| gene208  | gene208  | SACOL0214 | gi 57650036 ref NC_002951.2 :253141-254647   | q1 | q2 | OK | 439.614 | 103.236 | -2.09029  | 2.31821  | 0.020438  | 0.333246 |
| gene2080 | gene2080 | SACOL2088 | gi 57650036 ref NC_002951.2 :2151897-2152593 | q1 | q2 | OK | 26.113  | 65.9535 | 1.33668   | -2.70402 | 0.0068506 | 0.172504 |
| gene2081 | gene2081 | SACOL2089 | gi 57650036 ref NC_002951.2 :2152981-2153377 | q1 | q2 | OK | 27.017  | 40.911  | 0.598621  | -1.08344 | 0.278613  | 0.879877 |
| gene2082 | gene2082 | ywpF      | gi 57650036 ref NC_002951.2 :2153570-2154011 | q1 | q2 | OK | 91.8745 | 47.6095 | -0.948414 | 1.90695  | 0.0565265 | 0.540443 |
| gene2083 | gene2083 | fabZ      | gi 57650036 ref NC_002951.2 :2154069-2154510 | q1 | q2 | OK | 163.758 | 158.698 | -0.045276 | 0.09211  | 0.926614  | 0.996932 |
| gene2084 | gene2084 | murAA     | gi 57650036 ref NC_002951.2 :2154543-2155809 | q1 | q2 | OK | 262.11  | 287.006 | 0.130905  | -0.14016 | 0.888532  | 0.996932 |
| gene2085 | gene2085 | SACOL2093 | gi 57650036 ref NC_002951.2 :2155919-2156153 | q1 | q2 | OK | 207.026 | 289.332 | 0.482912  | -0.96316 | 0.335467  | 0.904788 |
| gene2086 | gene2086 | atpC      | gi 57650036 ref NC_002951.2 :2156714-2157119 | q1 | q2 | OK | 361.348 | 137.991 | -1.38881  | 2.62966  | 0.0085472 | 0.202471 |
| gene2087 | gene2087 | atpD      | gi 57650036 ref NC_002951.2 :2157138-2158551 | q1 | q2 | OK | 357.896 | 149.629 | -1.25815  | 1.37457  | 0.169266  | 0.814226 |
| gene2088 | gene2088 | atpG      | gi 57650036 ref NC_002951.2 :2158572-2159439 | q1 | q2 | OK | 287.584 | 126.389 | -1.18612  | 1.68128  | 0.0927089 | 0.659737 |
| gene2089 | gene2089 | atpA      | gi 57650036 ref NC_002951.2 :2159469-2160978 | q1 | q2 | OK | 323.365 | 152.161 | -1.08757  | 1.17578  | 0.239681  | 0.863954 |
| gene209  | gene209  | SACOL0215 | gi 57650036 ref NC_002951.2 :254672-256244   | q1 | q2 | OK | 626.5   | 294.425 | -1.08942  | 1.03085  | 0.302611  | 0.892668 |
| gene2090 | gene2090 | atpH      | gi 57650036 ref NC_002951.2 :2160999-2162060 | q1 | q2 | OK | 218.238 | 99.5574 | -1.1323   | 1.20744  | 0.227261  | 0.858851 |
| gene2091 | gene2091 | atpF      | gi 57650036 ref NC_002951.2 :2160999-2162060 | q1 | q2 | OK | 224.131 | 122.376 | -0.873016 | 0.94969  | 0.342272  | 0.905587 |
| gene2092 | gene2092 | atpE      | gi 57650036 ref NC_002951.2 :2162257-2162470 | q1 | q2 | OK | 529.932 | 183.823 | -1.52749  | 2.92328  | 0.0034636 | 0.119139 |
| gene2093 | gene2093 | atpB      | gi 57650036 ref NC_002951.2 :2162512-2163241 | q1 | q2 | OK | 353.735 | 140.884 | -1.32816  | 1.91325  | 0.0557158 | 0.538882 |
| gene2094 | gene2094 | SACOL2102 | gi 57650036 ref NC_002951.2 :2163261-2163615 | q1 | q2 | OK | 225.844 | 113.42  | -0.993651 | 2.02919  | 0.0424386 | 0.472836 |
| gene2095 | gene2095 | SACOL2103 | gi 57650036 ref NC_002951.2 :2163781-2164909 | q1 | q2 | OK | 442.824 | 219.082 | -1.01526  | 1.0959   | 0.273122  | 0.879648 |
| gene2096 | gene2096 | upp       | gi 57650036 ref NC_002951.2 :2164932-2165562 | q1 | q2 | OK | 268.682 | 129.491 | -1.05305  | 1.77108  | 0.0765467 | 0.618539 |
| gene2097 | gene2097 | glyA      | gi 57650036 ref NC_002951.2 :2165589-2166828 | q1 | q2 | OK | 594.828 | 266.172 | -1.16011  | 1.15912  | 0.246409  | 0.869586 |
| gene2098 | gene2098 | SACOL2106 | gi 57650036 ref NC_002951.2 :2166854-2167379 | q1 | q2 | OK | 449.355 | 193.545 | -1.21518  | 1.87982  | 0.0601324 | 0.549064 |
| gene2099 | gene2099 | SACOL2107 | gi 57650036 ref NC_002951.2 :2167485-2168957 | q1 | q2 | OK | 29.0409 | 34.5474 | 0.250494  | -0.17241 | 0.863119  | 0.996923 |
| gene21   | gene21   | yycG      | gi 57650036 ref NC_002951.2 :25665-28819     | q1 | q2 | OK | 162.393 | 156.675 | -0.051713 | 0.0402   | 0.967937  | 0.996932 |
| gene210  | gene210  | SACOL0216 | gi 57650036 ref NC_002951.2 :256690-257833   | q1 | q2 | OK | 78.7013 | 55.9118 | -0.493234 | 0.93258  | 0.351036  | 0.914147 |
| gene2100 | gene2100 | SACOL2108 | gi 57650036 ref NC_002951.2 :2167485-2168957 | q1 | q2 | OK | 55.7903 | 64.6617 | 0.212899  | -0.38332 | 0.701485  | 0.986963 |
| gene2101 | gene2101 | SACOL2109 | gi 57650036 ref NC_002951.2 :2169031-2170931 | q1 | q2 | OK | 79.6267 | 56.1881 | -0.502989 | 0.51731  | 0.604938  | 0.986963 |
| gene2102 | gene2102 | prfA      | gi 57650036 ref NC_002951.2 :2169031-2170931 | q1 | q2 | OK | 83.6594 | 55.6017 | -0.5894   | 0.7163   | 0.473807  | 0.95963  |
| gene2103 | gene2103 | tdk       | gi 57650036 ref NC_002951.2 :2170931-2171531 | q1 | q2 | OK | 132.292 | 79.8571 | -0.728239 | 1.4624   | 0.143631  | 0.777278 |

|          |          |           |                                              |    |    |        |         |         |           |          |           |           |
|----------|----------|-----------|----------------------------------------------|----|----|--------|---------|---------|-----------|----------|-----------|-----------|
| gene2104 | gene2104 | rpmE2     | gi 57650036 ref NC_002951.2 :2171877-2172132 | q1 | q2 | OK     | 205.232 | 64.5679 | -1.66837  | 3.04464  | 0.0023296 | 0.0958946 |
| gene2105 | gene2105 | rho       | gi 57650036 ref NC_002951.2 :2172249-2173566 | q1 | q2 | OK     | 300.718 | 97.8186 | -1.62023  | 1.97533  | 0.0482313 | 0.498616  |
| gene2106 | gene2106 | SACOL2114 | gi 57650036 ref NC_002951.2 :2173812-2175240 | q1 | q2 | OK     | 339.765 | 499.66  | 0.556409  | -0.53131 | 0.595205  | 0.985953  |
| gene2107 | gene2107 | SACOL2115 | gi 57650036 ref NC_002951.2 :2175477-2175813 | q1 | q2 | OK     | 2677.43 | 1135.91 | -1.237    | 1.3618   | 0.17326   | 0.819812  |
| gene2108 | gene2108 | murAB     | gi 57650036 ref NC_002951.2 :2175901-2177161 | q1 | q2 | OK     | 289.727 | 123.372 | -1.23168  | 1.48667  | 0.137102  | 0.75996   |
| gene2109 | gene2109 | fbaA      | gi 57650036 ref NC_002951.2 :2177626-2178487 | q1 | q2 | OK     | 458.344 | 117.759 | -1.9606   | 2.51767  | 0.0118135 | 0.249708  |
| gene211  | gene211  | SACOL0217 | gi 57650036 ref NC_002951.2 :258146-259622   | q1 | q2 | OK     | 33.9668 | 36.1987 | 0.0918117 | -0.1855  | 0.852838  | 0.996923  |
| gene2110 | gene2110 | SACOL2118 | gi 57650036 ref NC_002951.2 :2178704-2179226 | q1 | q2 | OK     | 39.6489 | 40.922  | 0.0455982 | -0.09049 | 0.927897  | 0.996932  |
| gene2111 | gene2111 | pyrG      | gi 57650036 ref NC_002951.2 :2179334-2180945 | q1 | q2 | OK     | 109.997 | 60.0919 | -0.872222 | 1.31569  | 0.188277  | 0.819847  |
| gene2112 | gene2112 | rpoE      | gi 57650036 ref NC_002951.2 :2181280-2181811 | q1 | q2 | OK     | 308.66  | 122.252 | -1.33616  | 2.35135  | 0.0187054 | 0.315668  |
| gene2113 | gene2113 | SACOL2121 | gi 57650036 ref NC_002951.2 :2181922-2182783 | q1 | q2 | OK     | 43.612  | 42.5022 | -0.037188 | 0.07709  | 0.938549  | 0.996932  |
| gene2114 | gene2114 | SACOL2122 | gi 57650036 ref NC_002951.2 :2183206-2184010 | q1 | q2 | OK     | 77.2108 | 42.9957 | -0.844611 | 1.71994  | 0.0854434 | 0.638501  |
| gene2115 | gene2115 | SACOL2123 | gi 57650036 ref NC_002951.2 :2184139-2184811 | q1 | q2 | OK     | 133.119 | 56.7559 | -1.22987  | 2.4266   | 0.0152412 | 0.288253  |
| gene2116 | gene2116 | SACOL2124 | gi 57650036 ref NC_002951.2 :2185209-2187587 | q1 | q2 | OK     | 88.3202 | 79.3769 | -0.154023 | 0.09924  | 0.920945  | 0.996932  |
| gene2117 | gene2117 | SACOL2125 | gi 57650036 ref NC_002951.2 :2185209-2187587 | q1 | q2 | OK     | 199.372 | 143.95  | -0.46989  | 0.43123  | 0.666302  | 0.986963  |
| gene2118 | gene2118 | luxS      | gi 57650036 ref NC_002951.2 :2187897-2188368 | q1 | q2 | OK     | 175.823 | 129.344 | -0.442912 | 0.89305  | 0.37183   | 0.929271  |
| gene2119 | gene2119 | SACOL2127 | gi 57650036 ref NC_002951.2 :2188519-2188870 | q1 | q2 | OK     | 327.502 | 128     | -1.35536  | 2.70308  | 0.00687   | 0.172504  |
| gene212  | gene212  | SACOL0218 | gi 57650036 ref NC_002951.2 :259819-260176   | q1 | q2 | OK     | 33.2431 | 32.6078 | -0.02784  | 0.04867  | 0.961183  | 0.996932  |
| gene2120 | gene2120 | pdp       | gi 57650036 ref NC_002951.2 :2188883-2190185 | q1 | q2 | OK     | 358.578 | 150.526 | -1.25228  | 1.40136  | 0.161106  | 0.802655  |
| gene2121 | gene2121 | deoC2     | gi 57650036 ref NC_002951.2 :2190463-2191126 | q1 | q2 | OK     | 425.131 | 141.244 | -1.58971  | 2.27952  | 0.0226359 | 0.342403  |
| gene2122 | gene2122 | deoD      | gi 57650036 ref NC_002951.2 :2191440-2192151 | q1 | q2 | OK     | 106.681 | 65.0823 | -0.712961 | 1.42888  | 0.15304   | 0.793468  |
| gene2123 | gene2123 | SACOL2131 | gi 57650036 ref NC_002951.2 :2192271-2192715 | q1 | q2 | OK     | 2936.49 | 2525.21 | -0.21769  | 0.19963  | 0.84177   | 0.996923  |
| gene2124 | gene2124 | SACOL2132 | gi 57650036 ref NC_002951.2 :2192914-2193328 | q1 | q2 | OK     | 67.5341 | 60.0245 | -0.170063 | 0.34029  | 0.733636  | 0.986963  |
| gene2125 | gene2125 | SACOL2133 | gi 57650036 ref NC_002951.2 :2193785-2195159 | q1 | q2 | OK     | 110.624 | 62.3883 | -0.826314 | 1.33089  | 0.183225  | 0.819812  |
| gene2126 | gene2126 | SACOL2134 | gi 57650036 ref NC_002951.2 :2195830-2196061 | q1 | q2 | OK     | 60.492  | 58.7824 | -0.04136  | 0.06397  | 0.948992  | 0.996932  |
| gene2127 | gene2127 | manA1     | gi 57650036 ref NC_002951.2 :2196091-2197030 | q1 | q2 | OK     | 61.5672 | 77.4621 | 0.331329  | -0.6547  | 0.512663  | 0.971029  |
| gene2128 | gene2128 | SACOL2136 | gi 57650036 ref NC_002951.2 :2197464-2198130 | q1 | q2 | OK     | 341.588 | 404.686 | 0.244547  | -0.31075 | 0.755992  | 0.986963  |
| gene2129 | gene2129 | czrA      | gi 57650036 ref NC_002951.2 :2198281-2198602 | q1 | q2 | OK     | 1056.99 | 68.7525 | -3.94241  | 6.09331  | 1.11E-09  | 2.78E-06  |
| gene213  | gene213  | SACOL0219 | gi 57650036 ref NC_002951.2 :260332-260506   | q1 | q2 | NOTEST | 0       | 0       | 0         | 0        | 1         | 1         |
| gene2130 | gene2130 | SACOL2138 | gi 57650036 ref NC_002951.2 :2198603-2199584 | q1 | q2 | OK     | 453.384 | 51.5199 | -3.13753  | 4.02882  | 5.61E-05  | 0.0086731 |
| gene2131 | gene2131 | SACOL2139 | gi 57650036 ref NC_002951.2 :2199793-2200941 | q1 | q2 | NOTEST | 0       | 0       | 0         | 0        | 1         | 1         |
| gene2132 | gene2132 | SACOL2140 | gi 57650036 ref NC_002951.2 :2199793-2200941 | q1 | q2 | OK     | 127.487 | 181.763 | 0.511702  | -0.70754 | 0.479233  | 0.960423  |
| gene2133 | gene2133 | SACOL2141 | gi 57650036 ref NC_002951.2 :2201903-2202107 | q1 | q2 | OK     | 136.444 | 93.1817 | -0.550192 | 0.86759  | 0.38562   | 0.938503  |

|          |          |             |                                              |    |    |        |         |         |            |            |           |           |
|----------|----------|-------------|----------------------------------------------|----|----|--------|---------|---------|------------|------------|-----------|-----------|
| gene2134 | gene2134 | SACOL2142   | gi 57650036 ref NC_002951.2 :2202165-2203302 | q1 | q2 | OK     | 39.6544 | 47.2557 | 0.253009   | -0.51563   | 0.606115  | 0.986963  |
| gene2135 | gene2135 | SACOL2143   | gi 57650036 ref NC_002951.2 :2204387-2205257 | q1 | q2 | OK     | 150.929 | 107.366 | -0.491339  | 0.84138    | 0.400136  | 0.939607  |
| gene2136 | gene2136 | SACOL2144   | gi 57650036 ref NC_002951.2 :2205312-2206095 | q1 | q2 | OK     | 57.0645 | 55.2942 | -0.045466  | 0.09394    | 0.925159  | 0.996932  |
| gene2137 | gene2137 | glmS        | gi 57650036 ref NC_002951.2 :2206326-2208132 | q1 | q2 | OK     | 149.293 | 60.776  | -1.29657   | 1.72334    | 0.0848275 | 0.638501  |
| gene2138 | gene2138 | SACOL2146   | gi 57650036 ref NC_002951.2 :2208812-2210351 | q1 | q2 | OK     | 78.733  | 38.8076 | -1.02063   | 1.79396    | 0.0728195 | 0.602117  |
| gene2139 | gene2139 | SACOL2147   | gi 57650036 ref NC_002951.2 :2210385-2212518 | q1 | q2 | OK     | 63.5115 | 62.7919 | -0.01644   | 0.02471    | 0.980286  | 0.998143  |
| gene214  | gene214  | SACOL0220   | gi 57650036 ref NC_002951.2 :260531-261677   | q1 | q2 | OK     | 140.352 | 89.7844 | -0.644508  | 1.01005    | 0.312471  | 0.892668  |
| gene2140 | gene2140 | SACOL2148   | gi 57650036 ref NC_002951.2 :2212529-2214070 | q1 | q2 | OK     | 111.782 | 247.9   | 1.14908    | -0.92508   | 0.354924  | 0.914747  |
| gene2141 | gene2141 | mtlD        | gi 57650036 ref NC_002951.2 :2212529-2214070 | q1 | q2 | OK     | 57.1935 | 152.234 | 1.41237    | -1.64747   | 0.0994608 | 0.680507  |
| gene2142 | gene2142 | fmtB        | gi 57650036 ref NC_002951.2 :2214388-2221825 | q1 | q2 | OK     | 33.7333 | 43.4621 | 0.365587   | -0.40021   | 0.689004  | 0.986963  |
| gene2143 | gene2143 | glmM        | gi 57650036 ref NC_002951.2 :2222101-2223457 | q1 | q2 | OK     | 187.007 | 144.5   | -0.372027  | 0.46102    | 0.644783  | 0.986963  |
| gene2144 | gene2144 | SACOL2152   | gi 57650036 ref NC_002951.2 :2223483-2224416 | q1 | q2 | OK     | 82.6336 | 58.5171 | -0.497871  | 0.97988    | 0.327146  | 0.900129  |
| gene2145 | gene2145 | SACOL2153   | gi 57650036 ref NC_002951.2 :2224417-2225227 | q1 | q2 | OK     | 156.223 | 96.7637 | -0.691066  | 1.22428    | 0.220848  | 0.849235  |
| gene2146 | gene2146 | rocF        | gi 57650036 ref NC_002951.2 :2225415-2226324 | q1 | q2 | OK     | 287.194 | 316.273 | 0.139145   | -0.16445   | 0.869374  | 0.996923  |
| gene2147 | gene2147 | SACOL2155   | gi 57650036 ref NC_002951.2 :2226549-2227752 | q1 | q2 | OK     | 10.6224 | 11.5358 | 0.119004   | -0.23056   | 0.817657  | 0.991377  |
| gene2149 | gene2149 | SACOL_tRNA- | gi 57650036 ref NC_002951.2 :2228058-2228133 | q1 | q2 | NOTEST | 0       | 0       | 0          | 0          | 1         | 1         |
| gene215  | gene215  | ldh1        | gi 57650036 ref NC_002951.2 :262249-263203   | q1 | q2 | OK     | 313.588 | 51.7802 | -2.5984    | 3.65575    | 0.0002564 | 0.0243066 |
| gene2150 | gene2150 | SACOL_tRNA- | gi 57650036 ref NC_002951.2 :2228142-2228226 | q1 | q2 | NOTEST | 0       | 0       | 0          | 0          | 1         | 1         |
| gene2151 | gene2151 | SACOL_tRNA- | gi 57650036 ref NC_002951.2 :2228255-2228331 | q1 | q2 | NOTEST | 0       | 0       | 0          | 0          | 1         | 1         |
| gene2152 | gene2152 | SACOL_tRNA- | gi 57650036 ref NC_002951.2 :2228338-2228410 | q1 | q2 | NOTEST | 0       | 0       | 0          | 0          | 1         | 1         |
| gene2153 | gene2153 | SACOL_tRNA- | gi 57650036 ref NC_002951.2 :2228411-2228486 | q1 | q2 | NOTEST | 0       | 0       | 0          | 0          | 1         | 1         |
| gene2154 | gene2154 | rrfF        | gi 57650036 ref NC_002951.2 :2228496-2228611 | q1 | q2 | OK     | 381992  | 276758  | -0.464917  | 0.53693    | 0.591316  | 0.985265  |
| gene2155 | gene2155 | rrlF        | gi 57650036 ref NC_002951.2 :2228683-2231606 | q1 | q2 | OK     | 37757.4 | 28699.7 | -0.395723  | 1.38989    | 0.164563  | 0.811825  |
| gene2156 | gene2156 | rrsF        | gi 57650036 ref NC_002951.2 :2232152-2233707 | q1 | q2 | OK     | 10491.1 | 8369.72 | -0.325909  | 0.4107     | 0.681293  | 0.986963  |
| gene2157 | gene2157 | SACOL2156   | gi 57650036 ref NC_002951.2 :2234162-2235227 | q1 | q2 | OK     | 373.188 | 284.337 | -0.392297  | 0.42429    | 0.671351  | 0.986963  |
| gene2158 | gene2158 | SACOL2157   | gi 57650036 ref NC_002951.2 :2235374-2236817 | q1 | q2 | OK     | 68.6047 | 84.1568 | 0.294772   | -0.492     | 0.622718  | 0.986963  |
| gene2159 | gene2159 | SACOL2158   | gi 57650036 ref NC_002951.2 :2237138-2237612 | q1 | q2 | OK     | 85.3395 | 86.7034 | 0.0228745  | -0.04737   | 0.962215  | 0.996932  |
| gene216  | gene216  | SACOL0223   | gi 57650036 ref NC_002951.2 :263370-263496   | q1 | q2 | OK     | 0       | 89.8694 | 1.79769e+3 | 1.79769e+0 | 0.18455   | 0.819812  |
| gene2160 | gene2160 | SACOL2159   | gi 57650036 ref NC_002951.2 :2237710-2239054 | q1 | q2 | OK     | 45.6551 | 45.6654 | 0.0003285  | -0.00065   | 0.999482  | 0.999482  |
| gene2161 | gene2161 | SACOL2160   | gi 57650036 ref NC_002951.2 :2239230-2239914 | q1 | q2 | OK     | 110.48  | 150.628 | 0.44721    | -0.84358   | 0.398903  | 0.939607  |
| gene2162 | gene2162 | SACOL2161   | gi 57650036 ref NC_002951.2 :2239932-2241120 | q1 | q2 | OK     | 215.35  | 210.085 | -0.035711  | 0.04261    | 0.966016  | 0.996932  |
| gene2163 | gene2163 | SACOL2162   | gi 57650036 ref NC_002951.2 :2241163-2241679 | q1 | q2 | OK     | 109.004 | 73.7952 | -0.562785  | 1.16049    | 0.24585   | 0.869586  |
| gene2164 | gene2164 | SACOL2163   | gi 57650036 ref NC_002951.2 :2241856-2242117 | q1 | q2 | OK     | 3964.78 | 1178.56 | -1.75022   | 2.15566    | 0.0311101 | 0.418808  |

|          |          |           |                                              |    |    |    |         |         |            |            |           |           |
|----------|----------|-----------|----------------------------------------------|----|----|----|---------|---------|------------|------------|-----------|-----------|
| gene2165 | gene2165 | SACOL2164 | gi 57650036 ref NC_002951.2 :2242248-2243619 | q1 | q2 | OK | 115.709 | 54.7554 | -1.07943   | 1.74044    | 0.0817815 | 0.629918  |
| gene2166 | gene2166 | SACOL2165 | gi 57650036 ref NC_002951.2 :2243854-2245851 | q1 | q2 | OK | 55.6445 | 33.1328 | -0.747977  | 0.92877    | 0.35301   | 0.914747  |
| gene2167 | gene2167 | SACOL2166 | gi 57650036 ref NC_002951.2 :2243854-2245851 | q1 | q2 | OK | 48.9017 | 43.1321 | -0.18112   | 0.2396     | 0.810641  | 0.991128  |
| gene2168 | gene2168 | SACOL2167 | gi 57650036 ref NC_002951.2 :2245862-2246846 | q1 | q2 | OK | 136.905 | 34.6581 | -1.98191   | 3.51257    | 0.0004438 | 0.0321701 |
| gene2169 | gene2169 | SACOL2168 | gi 57650036 ref NC_002951.2 :2247237-2248308 | q1 | q2 | OK | 36.2757 | 50.0222 | 0.463564   | -0.94917   | 0.342533  | 0.905587  |
| gene217  | gene217  | SACOL0224 | gi 57650036 ref NC_002951.2 :263522-265052   | q1 | q2 | OK | 50.967  | 70.4774 | 0.467596   | -0.82713   | 0.408164  | 0.939607  |
| gene2170 | gene2170 | SACOL2169 | gi 57650036 ref NC_002951.2 :2248314-2251252 | q1 | q2 | OK | 66.3523 | 64.8945 | -0.03205   | 0.03301    | 0.973665  | 0.998143  |
| gene2171 | gene2171 | SACOL2170 | gi 57650036 ref NC_002951.2 :2248314-2251252 | q1 | q2 | OK | 59.7825 | 67.0846 | 0.166259   | -0.13496   | 0.892646  | 0.996932  |
| gene2172 | gene2172 | SACOL2171 | gi 57650036 ref NC_002951.2 :2251353-2253330 | q1 | q2 | OK | 48.4032 | 40.8327 | -0.24538   | 0.43849    | 0.661032  | 0.986963  |
| gene2173 | gene2173 | SACOL2172 | gi 57650036 ref NC_002951.2 :2253785-2255410 | q1 | q2 | OK | 14.5305 | 28.1497 | 0.954033   | -1.95573   | 0.0504966 | 0.515435  |
| gene2174 | gene2174 | SACOL2173 | gi 57650036 ref NC_002951.2 :2255445-2255955 | q1 | q2 | OK | 2196.76 | 6176.27 | 1.49136    | -1.39195   | 0.163938  | 0.811825  |
| gene2175 | gene2175 | SACOL2174 | gi 57650036 ref NC_002951.2 :2256017-2256257 | q1 | q2 | OK | 1656.24 | 5434.36 | 1.7142     | -2.09371   | 0.0362858 | 0.442299  |
| gene2176 | gene2176 | SACOL2175 | gi 57650036 ref NC_002951.2 :2256269-2256818 | q1 | q2 | OK | 956.664 | 2521.29 | 1.39808    | -1.33723   | 0.181147  | 0.819812  |
| gene2177 | gene2177 | opuD2     | gi 57650036 ref NC_002951.2 :2256980-2258543 | q1 | q2 | OK | 225.497 | 632.642 | 1.48828    | -1.44827   | 0.147541  | 0.784907  |
| gene2178 | gene2178 | SACOL2177 | gi 57650036 ref NC_002951.2 :2258849-2259851 | q1 | q2 | OK | 110.488 | 95.8793 | -0.204594  | 0.35838    | 0.720062  | 0.986963  |
| gene2179 | gene2179 | SACOL2178 | gi 57650036 ref NC_002951.2 :2260084-2261086 | q1 | q2 | OK | 353.255 | 333.479 | -0.083114  | 0.09041    | 0.927963  | 0.996932  |
| gene218  | gene218  | SACOL0225 | gi 57650036 ref NC_002951.2 :265413-266349   | q1 | q2 | OK | 96.1795 | 127.628 | 0.408145   | -0.71457   | 0.474874  | 0.960423  |
| gene2180 | gene2180 | SACOL2179 | gi 57650036 ref NC_002951.2 :2261368-2262238 | q1 | q2 | OK | 221.858 | 235.512 | 0.086165   | -0.11593   | 0.907707  | 0.996932  |
| gene2181 | gene2181 | lacG      | gi 57650036 ref NC_002951.2 :2262503-2263916 | q1 | q2 | OK | 30.7618 | 31.8177 | 0.0486928  | -0.09991   | 0.920415  | 0.996932  |
| gene2182 | gene2182 | lacE      | gi 57650036 ref NC_002951.2 :2263933-2265963 | q1 | q2 | OK | 34.1602 | 42.2666 | 0.3072     | -0.53941   | 0.589603  | 0.985265  |
| gene2183 | gene2183 | lacF      | gi 57650036 ref NC_002951.2 :2263933-2265963 | q1 | q2 | OK | 59.8998 | 66.3636 | 0.147841   | -0.09887   | 0.921242  | 0.996932  |
| gene2184 | gene2184 | lacD      | gi 57650036 ref NC_002951.2 :2265984-2266965 | q1 | q2 | OK | 31.3268 | 34.2914 | 0.13045    | -0.27028   | 0.786942  | 0.986986  |
| gene2185 | gene2185 | lacC      | gi 57650036 ref NC_002951.2 :2266968-2267901 | q1 | q2 | OK | 66.4399 | 74.2039 | 0.159446   | -0.31516   | 0.752643  | 0.986963  |
| gene2186 | gene2186 | lacB      | gi 57650036 ref NC_002951.2 :2267913-2268429 | q1 | q2 | OK | 30.6679 | 34.1204 | 0.153906   | -0.29691   | 0.766533  | 0.986963  |
| gene2187 | gene2187 | SACOL2186 | gi 57650036 ref NC_002951.2 :2268444-2268873 | q1 | q2 | OK | 28.4797 | 29.5276 | 0.0521304  | -0.09463   | 0.924607  | 0.996932  |
| gene2188 | gene2188 | SACOL2187 | gi 57650036 ref NC_002951.2 :2268887-2269004 | q1 | q2 | OK | 0       | 193.459 | 1.79769e+3 | 1.79769e+0 | 0.18455   | 0.819812  |
| gene2189 | gene2189 | lacR      | gi 57650036 ref NC_002951.2 :2269240-2269996 | q1 | q2 | OK | 103.03  | 64.1262 | -0.684077  | 1.36228    | 0.173109  | 0.819812  |
| gene219  | gene219  | SACOL0228 | gi 57650036 ref NC_002951.2 :266687-269236   | q1 | q2 | OK | 20.9862 | 34.957  | 0.736139   | -1.30552   | 0.191716  | 0.819847  |
| gene2190 | gene2190 | SACOL2189 | gi 57650036 ref NC_002951.2 :2270246-2270978 | q1 | q2 | OK | 71.6844 | 69.8167 | -0.038085  | 0.07805    | 0.93779   | 0.996932  |
| gene2191 | gene2191 | SACOL2190 | gi 57650036 ref NC_002951.2 :2271268-2271877 | q1 | q2 | OK | 21.5537 | 31.0204 | 0.525281   | -1.01393   | 0.310618  | 0.892668  |
| gene2192 | gene2192 | SACOL2191 | gi 57650036 ref NC_002951.2 :2272138-2272264 | q1 | q2 | OK | 0       | 89.8694 | 1.79769e+3 | 1.79769e+0 | 0.18455   | 0.819812  |
| gene2193 | gene2193 | SACOL2192 | gi 57650036 ref NC_002951.2 :2272483-2273332 | q1 | q2 | OK | 103.218 | 168.903 | 0.7105     | -1.20502   | 0.228194  | 0.858851  |
| gene2194 | gene2194 | SACOL2193 | gi 57650036 ref NC_002951.2 :2273401-2273818 | q1 | q2 | OK | 53.653  | 57.5634 | 0.101493   | -0.20053   | 0.841067  | 0.996923  |

|          |          |           |                                              |    |    |        |         |         |            |           |           |           |
|----------|----------|-----------|----------------------------------------------|----|----|--------|---------|---------|------------|-----------|-----------|-----------|
| gene2195 | gene2195 | hysA      | gi 57650036 ref NC_002951.2 :2274225-2276649 | q1 | q2 | OK     | 24.3508 | 36.4066 | 0.580234   | -1.08311  | 0.27876   | 0.879877  |
| gene2196 | gene2196 | SACOL2195 | gi 57650036 ref NC_002951.2 :2276708-2277563 | q1 | q2 | OK     | 88.9986 | 119.006 | 0.419181   | -0.77792  | 0.436619  | 0.943503  |
| gene2197 | gene2197 | SACOL2196 | gi 57650036 ref NC_002951.2 :2277773-2278589 | q1 | q2 | OK     | 51.472  | 45.5221 | -0.17722   | 0.36698   | 0.713633  | 0.986963  |
| gene2198 | gene2198 | SACOL2197 | gi 57650036 ref NC_002951.2 :2278882-2279308 | q1 | q2 | OK     | 117.05  | 448.372 | 1.93757    | -3.45464  | 0.000551  | 0.0345903 |
| gene2199 | gene2199 | budA1     | gi 57650036 ref NC_002951.2 :2279671-2280376 | q1 | q2 | OK     | 36.8934 | 46.3341 | 0.328713   | -0.67633  | 0.498835  | 0.964618  |
| gene22   | gene22   | yycH      | gi 57650036 ref NC_002951.2 :25665-28819     | q1 | q2 | OK     | 154.284 | 120.966 | -0.350987  | 0.21166   | 0.832376  | 0.99481   |
| gene220  | gene220  | SACOL0229 | gi 57650036 ref NC_002951.2 :266687-269236   | q1 | q2 | OK     | 19.7321 | 37.5427 | 0.927986   | -0.64445  | 0.519285  | 0.971416  |
| gene2200 | gene2200 | budB      | gi 57650036 ref NC_002951.2 :2280412-2282077 | q1 | q2 | OK     | 48.4535 | 50.9438 | 0.0723044  | -0.13276  | 0.894387  | 0.996932  |
| gene2201 | gene2201 | SACOL2200 | gi 57650036 ref NC_002951.2 :2282356-2282452 | q1 | q2 | OK     | 7337.3  | 0       | -1.79769e+ | -1.79769e | 0.201324  | 0.819847  |
| gene2202 | gene2202 | SACOL2201 | gi 57650036 ref NC_002951.2 :2283266-2283866 | q1 | q2 | OK     | 52.8633 | 38.0272 | -0.475236  | 0.96787   | 0.333108  | 0.902303  |
| gene2203 | gene2203 | SACOL2202 | gi 57650036 ref NC_002951.2 :2283898-2284672 | q1 | q2 | OK     | 35.7421 | 29.9689 | -0.254161  | 0.51958   | 0.603357  | 0.986963  |
| gene2204 | gene2204 | SACOL2203 | gi 57650036 ref NC_002951.2 :2284800-2285937 | q1 | q2 | OK     | 58.2871 | 48.0872 | -0.277525  | 0.55151   | 0.581283  | 0.985265  |
| gene2205 | gene2205 | SACOL2204 | gi 57650036 ref NC_002951.2 :2285937-2286729 | q1 | q2 | OK     | 146.817 | 70.1045 | -1.06644   | 1.97338   | 0.0484518 | 0.498616  |
| gene2206 | gene2206 | SACOL2205 | gi 57650036 ref NC_002951.2 :2286768-2288129 | q1 | q2 | OK     | 25.5086 | 37.3746 | 0.551073   | -1.12979  | 0.258564  | 0.875983  |
| gene2207 | gene2207 | rpsI      | gi 57650036 ref NC_002951.2 :2288673-2289072 | q1 | q2 | OK     | 707.357 | 120.421 | -2.55435   | 4.04679   | 5.19E-05  | 0.0086731 |
| gene2208 | gene2208 | rplM      | gi 57650036 ref NC_002951.2 :2289085-2289523 | q1 | q2 | OK     | 444.286 | 100.481 | -2.14456   | 3.72675   | 0.000194  | 0.0202933 |
| gene2209 | gene2209 | truA      | gi 57650036 ref NC_002951.2 :2289762-2290566 | q1 | q2 | OK     | 104.708 | 58.7466 | -0.833795  | 1.64166   | 0.100661  | 0.684988  |
| gene221  | gene221  | SACOL0230 | gi 57650036 ref NC_002951.2 :269258-269537   | q1 | q2 | OK     | 58.9015 | 95.541  | 0.697816   | -1.27514  | 0.202259  | 0.819847  |
| gene2210 | gene2210 | SACOL2209 | gi 57650036 ref NC_002951.2 :2290570-2293033 | q1 | q2 | OK     | 53.1046 | 41.7299 | -0.347753  | 0.19746   | 0.843467  | 0.996923  |
| gene2211 | gene2211 | cbiO      | gi 57650036 ref NC_002951.2 :2290570-2293033 | q1 | q2 | OK     | 91.5686 | 70.3822 | -0.379643  | 0.29353   | 0.769119  | 0.986963  |
| gene2212 | gene2212 | cbiO      | gi 57650036 ref NC_002951.2 :2290570-2293033 | q1 | q2 | OK     | 143.956 | 104.353 | -0.464154  | 0.4274    | 0.669085  | 0.986963  |
| gene2213 | gene2213 | rplQ      | gi 57650036 ref NC_002951.2 :2293570-2293939 | q1 | q2 | OK     | 845.398 | 188.038 | -2.16861   | 3.3929    | 0.0006916 | 0.040697  |
| gene2214 | gene2214 | rpoA      | gi 57650036 ref NC_002951.2 :2293955-2294900 | q1 | q2 | OK     | 898.634 | 223.098 | -2.01006   | 2.13765   | 0.0325452 | 0.420136  |
| gene2215 | gene2215 | rpsK      | gi 57650036 ref NC_002951.2 :2294974-2295364 | q1 | q2 | OK     | 692.733 | 174.753 | -1.98698   | 3.20089   | 0.00137   | 0.0637061 |
| gene2216 | gene2216 | rpsM      | gi 57650036 ref NC_002951.2 :2295387-2295753 | q1 | q2 | OK     | 1062.13 | 276.93  | -1.93937   | 2.82962   | 0.0046603 | 0.137671  |
| gene2217 | gene2217 | rpmJ      | gi 57650036 ref NC_002951.2 :2295775-2295889 | q1 | q2 | OK     | 3927.9  | 1082.94 | -1.8588    | 1.94744   | 0.0514825 | 0.51709   |
| gene2218 | gene2218 | infA      | gi 57650036 ref NC_002951.2 :2295920-2296139 | q1 | q2 | OK     | 728.922 | 267.441 | -1.44654   | 2.87933   | 0.0039852 | 0.12949   |
| gene2219 | gene2219 | adk       | gi 57650036 ref NC_002951.2 :2296331-2296979 | q1 | q2 | OK     | 484.807 | 150.629 | -1.68641   | 2.35083   | 0.0187314 | 0.315668  |
| gene222  | gene222  | SACOL0231 | gi 57650036 ref NC_002951.2 :269601-269736   | q1 | q2 | NOTEST | 0       | 0       | 0          | 0         | 1         | 1         |
| gene2220 | gene2220 | secY      | gi 57650036 ref NC_002951.2 :2296995-2298728 | q1 | q2 | OK     | 593.296 | 211.062 | -1.49108   | 1.19724   | 0.231212  | 0.863102  |
| gene2221 | gene2221 | rplO      | gi 57650036 ref NC_002951.2 :2296995-2298728 | q1 | q2 | OK     | 913.215 | 455.618 | -1.00313   | 0.52367   | 0.600507  | 0.986963  |
| gene2222 | gene2222 | rpmD      | gi 57650036 ref NC_002951.2 :2298744-2298924 | q1 | q2 | OK     | 879.873 | 203.032 | -2.11559   | 3.65086   | 0.0002614 | 0.0243066 |
| gene2223 | gene2223 | rpsE      | gi 57650036 ref NC_002951.2 :2298940-2299441 | q1 | q2 | OK     | 990.553 | 174.902 | -2.50169   | 3.25762   | 0.0011235 | 0.0559091 |

|          |          |           |                                              |    |    |    |         |         |              |              |           |           |
|----------|----------|-----------|----------------------------------------------|----|----|----|---------|---------|--------------|--------------|-----------|-----------|
| gene2224 | gene2224 | rplR      | gi 57650036 ref NC_002951.2 :2299461-2299821 | q1 | q2 | OK | 1774.18 | 307.901 | -2.52661     | 3.27274      | 0.0010651 | 0.0545811 |
| gene2225 | gene2225 | rplF      | gi 57650036 ref NC_002951.2 :2299851-2300388 | q1 | q2 | OK | 739.26  | 141.456 | -2.38573     | 3.25459      | 0.0011356 | 0.0559091 |
| gene2226 | gene2226 | rpsH      | gi 57650036 ref NC_002951.2 :2300412-2300811 | q1 | q2 | OK | 620.321 | 124.7   | -2.31455     | 3.81636      | 0.0001354 | 0.0170042 |
| gene2227 | gene2227 | rpsN      | gi 57650036 ref NC_002951.2 :2300842-2301028 | q1 | q2 | OK | 343.4   | 93.0463 | -1.88387     | 2.81548      | 0.0048705 | 0.140572  |
| gene2228 | gene2228 | rplE      | gi 57650036 ref NC_002951.2 :2301050-2301590 | q1 | q2 | OK | 730.472 | 125.465 | -2.54155     | 3.48198      | 0.0004977 | 0.0332187 |
| gene2229 | gene2229 | rplX      | gi 57650036 ref NC_002951.2 :2301616-2301934 | q1 | q2 | OK | 1592.56 | 317.187 | -2.32794     | 3.3023       | 0.0009589 | 0.0512318 |
| gene223  | gene223  | SACOL0232 | gi 57650036 ref NC_002951.2 :269763-271023   | q1 | q2 | OK | 34.8648 | 43.9474 | 0.334007     | -0.67886     | 0.497224  | 0.964002  |
| gene2230 | gene2230 | rplN      | gi 57650036 ref NC_002951.2 :2301969-2302338 | q1 | q2 | OK | 710.574 | 151.14  | -2.2331      | 3.68695      | 0.000227  | 0.0227959 |
| gene2231 | gene2231 | rpsQ      | gi 57650036 ref NC_002951.2 :2302369-2302633 | q1 | q2 | OK | 1488.86 | 298.801 | -2.31695     | 3.82653      | 0.00013   | 0.0170042 |
| gene2232 | gene2232 | rpmC      | gi 57650036 ref NC_002951.2 :2302656-2303290 | q1 | q2 | OK | 655.772 | 142.482 | -2.20242     | 0.93018      | 0.35228   | 0.914147  |
| gene2233 | gene2233 | rplP      | gi 57650036 ref NC_002951.2 :2302656-2303290 | q1 | q2 | OK | 956.45  | 200.207 | -2.2562      | 2.88282      | 0.0039414 | 0.12949   |
| gene2234 | gene2234 | rpsC      | gi 57650036 ref NC_002951.2 :2303292-2303946 | q1 | q2 | OK | 617.107 | 145.344 | -2.08604     | 2.7425       | 0.0060974 | 0.157851  |
| gene2235 | gene2235 | rplV      | gi 57650036 ref NC_002951.2 :2303969-2304323 | q1 | q2 | OK | 675.654 | 160.485 | -2.07384     | 3.55854      | 0.0003729 | 0.0300704 |
| gene2236 | gene2236 | rpsS      | gi 57650036 ref NC_002951.2 :2304351-2304630 | q1 | q2 | OK | 817.258 | 203.366 | -2.00671     | 3.73728      | 0.000186  | 0.0202933 |
| gene2237 | gene2237 | rplB      | gi 57650036 ref NC_002951.2 :2304696-2305530 | q1 | q2 | OK | 431.403 | 139.696 | -1.62675     | 2.10679      | 0.0351362 | 0.436145  |
| gene2238 | gene2238 | rplW      | gi 57650036 ref NC_002951.2 :2305562-2306461 | q1 | q2 | OK | 529.762 | 213.941 | -1.30813     | 0.73642      | 0.461478  | 0.950591  |
| gene2239 | gene2239 | rplD      | gi 57650036 ref NC_002951.2 :2305562-2306461 | q1 | q2 | OK | 485.992 | 205.867 | -1.23922     | 1.41243      | 0.157824  | 0.800504  |
| gene224  | gene224  | gutB      | gi 57650036 ref NC_002951.2 :271040-272096   | q1 | q2 | OK | 39.2357 | 47.5498 | 0.277275     | -0.56905     | 0.569323  | 0.985265  |
| gene2240 | gene2240 | rplC      | gi 57650036 ref NC_002951.2 :2306487-2307150 | q1 | q2 | OK | 318.38  | 161.344 | -0.980614    | 1.50153      | 0.133219  | 0.751714  |
| gene2241 | gene2241 | rpsJ      | gi 57650036 ref NC_002951.2 :2307177-2307486 | q1 | q2 | OK | 498.561 | 266.491 | -0.903683    | 1.77051      | 0.0766426 | 0.618539  |
| gene2242 | gene2242 | SACOL2241 | gi 57650036 ref NC_002951.2 :2307842-2308232 | q1 | q2 | OK | 367.049 | 533.189 | 0.538672     | -0.901       | 0.367588  | 0.928011  |
| gene2243 | gene2243 | SACOL2242 | gi 57650036 ref NC_002951.2 :2308423-2309758 | q1 | q2 | OK | 135.445 | 61.4011 | -1.14137     | 1.76174      | 0.0781136 | 0.622677  |
| gene2244 | gene2244 | topB      | gi 57650036 ref NC_002951.2 :2309870-2312006 | q1 | q2 | OK | 88.1575 | 75.6272 | -0.221177    | 0.29634      | 0.766973  | 0.986963  |
| gene2245 | gene2245 | SACOL2245 | gi 57650036 ref NC_002951.2 :2312192-2313080 | q1 | q2 | OK | 47.2808 | 60.1879 | 0.34822      | -0.71425     | 0.475074  | 0.960423  |
| gene2246 | gene2246 | SACOL2246 | gi 57650036 ref NC_002951.2 :2313260-2314124 | q1 | q2 | OK | 68.3799 | 92.2003 | 0.4312       | -0.84541     | 0.397884  | 0.939607  |
| gene2247 | gene2247 | SACOL2247 | gi 57650036 ref NC_002951.2 :2314240-2314372 | q1 | q2 | OK | 67.0227 | 0       | -1.79769e+01 | -1.79769e+01 | 0.117533  | 0.723345  |
| gene2248 | gene2248 | SACOL2248 | gi 57650036 ref NC_002951.2 :2314542-2315451 | q1 | q2 | OK | 48.2824 | 57.9015 | 0.262104     | -0.53727     | 0.591085  | 0.985265  |
| gene2249 | gene2249 | SACOL2250 | gi 57650036 ref NC_002951.2 :2315583-2315748 | q1 | q2 | OK | 41.1774 | 41.0524 | -0.004386    | 0.00353      | 0.997184  | 0.998434  |
| gene225  | gene225  | SACOL0234 | gi 57650036 ref NC_002951.2 :272097-272244   | q1 | q2 | OK | 80.1742 | 0       | -1.79769e+01 | -1.79769e+01 | 0.0370172 | 0.444619  |
| gene2250 | gene2250 | SACOL2251 | gi 57650036 ref NC_002951.2 :2315992-2316310 | q1 | q2 | OK | 113.421 | 141.514 | 0.319252     | -0.64891     | 0.516394  | 0.971416  |
| gene2251 | gene2251 | SACOL2252 | gi 57650036 ref NC_002951.2 :2316496-2319664 | q1 | q2 | OK | 94.5143 | 77.1715 | -0.292464    | 0.32878      | 0.74232   | 0.986963  |
| gene2252 | gene2252 | femX      | gi 57650036 ref NC_002951.2 :2319780-2321046 | q1 | q2 | OK | 117.829 | 67.2651 | -0.808759    | 1.31657      | 0.187982  | 0.819847  |
| gene2253 | gene2253 | SACOL2255 | gi 57650036 ref NC_002951.2 :2321677-2322442 | q1 | q2 | OK | 81.8772 | 65.4062 | -0.324035    | 0.65723      | 0.511035  | 0.971029  |

|          |          |           |                                              |    |    |    |         |         |           |          |           |          |
|----------|----------|-----------|----------------------------------------------|----|----|----|---------|---------|-----------|----------|-----------|----------|
| gene2254 | gene2254 | SACOL2256 | gi 57650036 ref NC_002951.2 :2322603-2324248 | q1 | q2 | OK | 17.4391 | 31.7397 | 0.863959  | -0.73126 | 0.464619  | 0.952374 |
| gene2255 | gene2255 | SACOL2257 | gi 57650036 ref NC_002951.2 :2322603-2324248 | q1 | q2 | OK | 24.2762 | 35.0757 | 0.530932  | -0.99022 | 0.322065  | 0.89482  |
| gene2256 | gene2256 | sarV      | gi 57650036 ref NC_002951.2 :2324349-2324700 | q1 | q2 | OK | 90.3016 | 36.908  | -1.29082  | 2.42294  | 0.0153956 | 0.288253 |
| gene2257 | gene2257 | SACOL2259 | gi 57650036 ref NC_002951.2 :2324825-2324996 | q1 | q2 | OK | 6.80896 | 11.1565 | 0.712373  | -0.30234 | 0.762395  | 0.986963 |
| gene2258 | gene2258 | SACOL2260 | gi 57650036 ref NC_002951.2 :2325052-2325196 | q1 | q2 | OK | 73.029  | 31.8426 | -1.19751  | 0.65307  | 0.513713  | 0.971029 |
| gene2259 | gene2259 | moaA      | gi 57650036 ref NC_002951.2 :2325390-2326413 | q1 | q2 | OK | 186.431 | 112.369 | -0.730402 | 1.08563  | 0.277642  | 0.879877 |
| gene226  | gene226  | SACOL0235 | gi 57650036 ref NC_002951.2 :272267-273311   | q1 | q2 | OK | 71.0909 | 84.7554 | 0.25364   | -0.4768  | 0.633508  | 0.986963 |
| gene2260 | gene2260 | mobA      | gi 57650036 ref NC_002951.2 :2326432-2327032 | q1 | q2 | OK | 122.9   | 67.4982 | -0.864569 | 1.75025  | 0.0800747 | 0.628579 |
| gene2261 | gene2261 | moaD      | gi 57650036 ref NC_002951.2 :2327038-2327272 | q1 | q2 | OK | 89.4774 | 51.0585 | -0.80937  | 1.28728  | 0.197997  | 0.819847 |
| gene2262 | gene2262 | moaE      | gi 57650036 ref NC_002951.2 :2327277-2327724 | q1 | q2 | OK | 156.891 | 105.065 | -0.578477 | 1.18687  | 0.235279  | 0.863102 |
| gene2263 | gene2263 | mobB      | gi 57650036 ref NC_002951.2 :2327737-2329479 | q1 | q2 | OK | 285.366 | 248.076 | -0.202028 | 0.15354  | 0.877973  | 0.996932 |
| gene2264 | gene2264 | SACOL2266 | gi 57650036 ref NC_002951.2 :2327737-2329479 | q1 | q2 | OK | 145.288 | 87.8948 | -0.725062 | 0.68034  | 0.496289  | 0.964002 |
| gene2265 | gene2265 | moaC      | gi 57650036 ref NC_002951.2 :2329541-2330036 | q1 | q2 | OK | 146.192 | 93.5767 | -0.643647 | 1.31356  | 0.188994  | 0.819847 |
| gene2266 | gene2266 | moaB      | gi 57650036 ref NC_002951.2 :2330037-2330544 | q1 | q2 | OK | 118.069 | 82.7748 | -0.512366 | 1.05542  | 0.291235  | 0.891156 |
| gene2267 | gene2267 | SACOL2269 | gi 57650036 ref NC_002951.2 :2330574-2331579 | q1 | q2 | OK | 113.41  | 79.608  | -0.510569 | 0.90931  | 0.363185  | 0.925845 |
| gene2268 | gene2268 | modC      | gi 57650036 ref NC_002951.2 :2331748-2332354 | q1 | q2 | OK | 71.7216 | 63.73   | -0.170435 | 0.35317  | 0.723959  | 0.986963 |
| gene2269 | gene2269 | modB      | gi 57650036 ref NC_002951.2 :2332354-2333026 | q1 | q2 | OK | 72.1924 | 62.7018 | -0.20334  | 0.42015  | 0.674378  | 0.986963 |
| gene227  | gene227  | ispD      | gi 57650036 ref NC_002951.2 :273838-275573   | q1 | q2 | OK | 128.092 | 98.0122 | -0.386142 | 0.33938  | 0.734323  | 0.986963 |
| gene2270 | gene2270 | modA      | gi 57650036 ref NC_002951.2 :2333039-2333822 | q1 | q2 | OK | 157.069 | 148.039 | -0.085422 | 0.14517  | 0.884575  | 0.996932 |
| gene2271 | gene2271 | fdhD      | gi 57650036 ref NC_002951.2 :2334111-2334909 | q1 | q2 | OK | 142.475 | 183.761 | 0.367124  | -0.60103 | 0.547823  | 0.979019 |
| gene2272 | gene2272 | SACOL2274 | gi 57650036 ref NC_002951.2 :2335080-2335851 | q1 | q2 | OK | 26.508  | 28.7729 | 0.118283  | -0.23863 | 0.811396  | 0.991128 |
| gene2273 | gene2273 | SACOL2275 | gi 57650036 ref NC_002951.2 :2335922-2336477 | q1 | q2 | OK | 119.558 | 157.35  | 0.396263  | -0.78429 | 0.432871  | 0.940247 |
| gene2274 | gene2274 | SACOL2276 | gi 57650036 ref NC_002951.2 :2336597-2337539 | q1 | q2 | OK | 58.187  | 48.7668 | -0.254797 | 0.51995  | 0.603101  | 0.986963 |
| gene2275 | gene2275 | SACOL2277 | gi 57650036 ref NC_002951.2 :2337937-2338846 | q1 | q2 | OK | 266.413 | 101.419 | -1.39334  | 2.01782  | 0.0436102 | 0.47611  |
| gene2276 | gene2276 | SACOL2278 | gi 57650036 ref NC_002951.2 :2339059-2340214 | q1 | q2 | OK | 136.256 | 150.432 | 0.142791  | -0.2028  | 0.839295  | 0.996923 |
| gene2277 | gene2277 | SACOL2279 | gi 57650036 ref NC_002951.2 :2340430-2341336 | q1 | q2 | OK | 36.5554 | 51.3767 | 0.491033  | -1.01401 | 0.310577  | 0.892668 |
| gene2278 | gene2278 | ureA      | gi 57650036 ref NC_002951.2 :2341595-2341898 | q1 | q2 | OK | 59.6027 | 93.2223 | 0.645296  | -1.21703 | 0.223592  | 0.853955 |
| gene2279 | gene2279 | ureB      | gi 57650036 ref NC_002951.2 :2341911-2344034 | q1 | q2 | OK | 36.3376 | 32.4335 | -0.163981 | 0.09112  | 0.927397  | 0.996932 |
| gene228  | gene228  | SACOL0237 | gi 57650036 ref NC_002951.2 :273838-275573   | q1 | q2 | OK | 92.1472 | 113.851 | 0.305134  | -0.32217 | 0.747324  | 0.986963 |
| gene2280 | gene2280 | ureC      | gi 57650036 ref NC_002951.2 :2341911-2344034 | q1 | q2 | OK | 46.4075 | 49.5943 | 0.0958174 | -0.16168 | 0.871558  | 0.996923 |
| gene2281 | gene2281 | ureE      | gi 57650036 ref NC_002951.2 :2344046-2345181 | q1 | q2 | OK | 29.7371 | 32.7769 | 0.140416  | -0.16954 | 0.865373  | 0.996923 |
| gene2282 | gene2282 | ureF      | gi 57650036 ref NC_002951.2 :2344046-2345181 | q1 | q2 | OK | 32.8508 | 32.324  | -0.023324 | 0.03921  | 0.968725  | 0.996932 |
| gene2283 | gene2283 | ureG      | gi 57650036 ref NC_002951.2 :2345193-2346644 | q1 | q2 | OK | 45.6389 | 42.214  | -0.112541 | 0.16093  | 0.872146  | 0.996923 |



|          |          |           |                                              |    |    |    |         |         |           |          |           |           |
|----------|----------|-----------|----------------------------------------------|----|----|----|---------|---------|-----------|----------|-----------|-----------|
| gene2284 | gene2284 | ureD      | gi 57650036 ref NC_002951.2 :2345193-2346644 | q1 | q2 | OK | 34.6203 | 26.6792 | -0.375902 | 0.5492   | 0.582868  | 0.985265  |
| gene2285 | gene2285 | sarR      | gi 57650036 ref NC_002951.2 :2346832-2347180 | q1 | q2 | OK | 125.439 | 147.105 | 0.229858  | -0.47466 | 0.635029  | 0.986963  |
| gene2286 | gene2286 | SACOL2288 | gi 57650036 ref NC_002951.2 :2347607-2347934 | q1 | q2 | OK | 171.427 | 133.644 | -0.3592   | 0.73934  | 0.459701  | 0.950591  |
| gene2287 | gene2287 | sarY      | gi 57650036 ref NC_002951.2 :2347997-2348741 | q1 | q2 | OK | 19.1055 | 39.3453 | 1.0422    | -2.07542 | 0.0379474 | 0.449462  |
| gene2288 | gene2288 | SACOL2290 | gi 57650036 ref NC_002951.2 :2348766-2350722 | q1 | q2 | OK | 25.877  | 55.1877 | 1.09268   | -1.98276 | 0.047394  | 0.493802  |
| gene2289 | gene2289 | SACOL2291 | gi 57650036 ref NC_002951.2 :2351331-2352135 | q1 | q2 | OK | 87.2263 | 121.112 | 0.473501  | -0.89572 | 0.370405  | 0.929157  |
| gene229  | gene229  | SACOL0238 | gi 57650036 ref NC_002951.2 :275594-277289   | q1 | q2 | OK | 55.3797 | 56.5793 | 0.0309168 | -0.05427 | 0.956722  | 0.996932  |
| gene2290 | gene2290 | nhaC      | gi 57650036 ref NC_002951.2 :2352567-2353968 | q1 | q2 | OK | 56.9616 | 70.0155 | 0.297683  | -0.53756 | 0.590881  | 0.985265  |
| gene2291 | gene2291 | SACOL2293 | gi 57650036 ref NC_002951.2 :2354062-2355145 | q1 | q2 | OK | 72.1047 | 68.4514 | -0.075013 | 0.1431   | 0.886212  | 0.996932  |
| gene2292 | gene2292 | SACOL2294 | gi 57650036 ref NC_002951.2 :2355392-2355815 | q1 | q2 | OK | 64.6833 | 40.7195 | -0.667674 | 1.30561  | 0.191685  | 0.819847  |
| gene2293 | gene2293 | SACOL2295 | gi 57650036 ref NC_002951.2 :2356051-2356552 | q1 | q2 | OK | 147.381 | 893.618 | 2.60011   | -3.51186 | 0.000445  | 0.0321701 |
| gene2294 | gene2294 | SACOL2296 | gi 57650036 ref NC_002951.2 :2356913-2357867 | q1 | q2 | OK | 340.838 | 146.768 | -1.21555  | 1.5535   | 0.120305  | 0.725365  |
| gene2295 | gene2295 | SACOL2297 | gi 57650036 ref NC_002951.2 :2357958-2359083 | q1 | q2 | OK | 93.9707 | 80.4173 | -0.224705 | 0.39763  | 0.690904  | 0.986963  |
| gene2296 | gene2296 | SACOL2298 | gi 57650036 ref NC_002951.2 :2359393-2360170 | q1 | q2 | OK | 102.133 | 46.5065 | -1.13494  | 2.26067  | 0.0237797 | 0.353318  |
| gene2297 | gene2297 | SACOL2299 | gi 57650036 ref NC_002951.2 :2360191-2360443 | q1 | q2 | OK | 87.4886 | 63.4151 | -0.464267 | 0.80147  | 0.422862  | 0.939652  |
| gene2298 | gene2298 | SACOL2300 | gi 57650036 ref NC_002951.2 :2360652-2364080 | q1 | q2 | OK | 367.908 | 654.134 | 0.830241  | -0.20506 | 0.837522  | 0.996923  |
| gene2299 | gene2299 | SACOL2301 | gi 57650036 ref NC_002951.2 :2360652-2364080 | q1 | q2 | OK | 667.291 | 812.259 | 0.283623  | -0.26167 | 0.793576  | 0.987448  |
| gene23   | gene23   | yycI      | gi 57650036 ref NC_002951.2 :28819-29608     | q1 | q2 | OK | 161.33  | 104.259 | -0.629837 | 1.11192  | 0.266171  | 0.875983  |
| gene230  | gene230  | SACOL0239 | gi 57650036 ref NC_002951.2 :277716-278886   | q1 | q2 | OK | 48.1644 | 46.346  | -0.055524 | 0.11178  | 0.911001  | 0.996932  |
| gene2300 | gene2300 | SACOL2302 | gi 57650036 ref NC_002951.2 :2364681-2365635 | q1 | q2 | OK | 178.815 | 146.425 | -0.288304 | 0.4287   | 0.668142  | 0.986963  |
| gene2301 | gene2301 | SACOL2303 | gi 57650036 ref NC_002951.2 :2365761-2366559 | q1 | q2 | OK | 174.095 | 96.5015 | -0.851253 | 1.47747  | 0.139551  | 0.763424  |
| gene2302 | gene2302 | SACOL2304 | gi 57650036 ref NC_002951.2 :2366943-2367636 | q1 | q2 | OK | 149.63  | 96.6612 | -0.630395 | 1.19447  | 0.232296  | 0.863102  |
| gene2303 | gene2303 | SACOL2305 | gi 57650036 ref NC_002951.2 :2367991-2369020 | q1 | q2 | OK | 87.2106 | 114.766 | 0.39612   | -0.5188  | 0.603898  | 0.986963  |
| gene2304 | gene2304 | SACOL2306 | gi 57650036 ref NC_002951.2 :2367991-2369020 | q1 | q2 | OK | 28.0461 | 45.9622 | 0.71265   | -1.12668 | 0.259878  | 0.875983  |
| gene2305 | gene2305 | SACOL2307 | gi 57650036 ref NC_002951.2 :2369068-2369398 | q1 | q2 | OK | 31.6333 | 69.951  | 1.1449    | -2.05376 | 0.0399993 | 0.459353  |
| gene2306 | gene2306 | SACOL2308 | gi 57650036 ref NC_002951.2 :2369842-2370715 | q1 | q2 | OK | 337.363 | 143.107 | -1.23721  | 1.65512  | 0.0979011 | 0.673787  |
| gene2307 | gene2307 | SACOL2309 | gi 57650036 ref NC_002951.2 :2371101-2372481 | q1 | q2 | OK | 333.95  | 126.471 | -1.40083  | 1.594    | 0.110937  | 0.717934  |
| gene2308 | gene2308 | SACOL2310 | gi 57650036 ref NC_002951.2 :2372760-2373299 | q1 | q2 | OK | 92.9576 | 62.1823 | -0.58007  | 1.07368  | 0.282968  | 0.880646  |
| gene2309 | gene2309 | SACOL2311 | gi 57650036 ref NC_002951.2 :2372760-2373299 | q1 | q2 | OK | 90.3685 | 128.833 | 0.511614  | -0.3875  | 0.69839   | 0.986963  |
| gene231  | gene231  | ispD      | gi 57650036 ref NC_002951.2 :279161-280896   | q1 | q2 | OK | 87.1529 | 68.0641 | -0.356656 | 0.23571  | 0.813657  | 0.991128  |
| gene2310 | gene2310 | SACOL2312 | gi 57650036 ref NC_002951.2 :2373394-2373586 | q1 | q2 | OK | 90.0609 | 116.069 | 0.36601   | -0.528   | 0.5975    | 0.986963  |
| gene2311 | gene2311 | SACOL2313 | gi 57650036 ref NC_002951.2 :2373596-2374232 | q1 | q2 | OK | 80.7322 | 63.0133 | -0.357488 | 0.73803  | 0.460496  | 0.950591  |
| gene2312 | gene2312 | SACOL2314 | gi 57650036 ref NC_002951.2 :2374306-2375224 | q1 | q2 | OK | 39.3658 | 48.7398 | 0.308159  | -0.63709 | 0.524068  | 0.972546  |

|          |          |           |                                              |    |    |        |         |         |           |          |           |          |
|----------|----------|-----------|----------------------------------------------|----|----|--------|---------|---------|-----------|----------|-----------|----------|
| gene2313 | gene2313 | SACOL2315 | gi 57650036 ref NC_002951.2 :2375491-2376022 | q1 | q2 | OK     | 23.9643 | 18.9832 | -0.336165 | 0.61265  | 0.540105  | 0.978583 |
| gene2314 | gene2314 | SACOL2316 | gi 57650036 ref NC_002951.2 :2376087-2377692 | q1 | q2 | OK     | 67.7875 | 69.5506 | 0.0370429 | -0.06153 | 0.950936  | 0.996932 |
| gene2315 | gene2315 | SACOL2317 | gi 57650036 ref NC_002951.2 :2378021-2378786 | q1 | q2 | OK     | 22.3125 | 34.5199 | 0.629576  | -1.26592 | 0.205542  | 0.823151 |
| gene2316 | gene2316 | SACOL2318 | gi 57650036 ref NC_002951.2 :2378843-2379350 | q1 | q2 | OK     | 339.149 | 253.625 | -0.419219 | 0.69354  | 0.487973  | 0.964002 |
| gene2317 | gene2317 | SACOL2319 | gi 57650036 ref NC_002951.2 :2379516-2380830 | q1 | q2 | OK     | 85.9281 | 62.4239 | -0.461032 | 0.80736  | 0.419458  | 0.939652 |
| gene2318 | gene2318 | SACOL2320 | gi 57650036 ref NC_002951.2 :2381054-2381624 | q1 | q2 | OK     | 54.8016 | 61.8001 | 0.173391  | -0.35778 | 0.720506  | 0.986963 |
| gene2319 | gene2319 | SACOL2321 | gi 57650036 ref NC_002951.2 :2382110-2382992 | q1 | q2 | OK     | 193.31  | 287.258 | 0.571431  | -0.75183 | 0.452153  | 0.949479 |
| gene232  | gene232  | SACOL0241 | gi 57650036 ref NC_002951.2 :279161-280896   | q1 | q2 | OK     | 169.049 | 125.926 | -0.424865 | 0.48503  | 0.627657  | 0.986963 |
| gene2320 | gene2320 | SACOL2322 | gi 57650036 ref NC_002951.2 :2383102-2384224 | q1 | q2 | OK     | 68.5465 | 80.6742 | 0.235024  | -0.43696 | 0.662142  | 0.986963 |
| gene2321 | gene2321 | hutI      | gi 57650036 ref NC_002951.2 :2384500-2387400 | q1 | q2 | OK     | 76.0688 | 69.7355 | -0.12541  | 0.08716  | 0.930544  | 0.996932 |
| gene2322 | gene2322 | hutU      | gi 57650036 ref NC_002951.2 :2384500-2387400 | q1 | q2 | OK     | 97.1018 | 98.25   | 0.0169594 | -0.01614 | 0.987125  | 0.998143 |
| gene2323 | gene2323 | SACOL2325 | gi 57650036 ref NC_002951.2 :2387559-2388444 | q1 | q2 | OK     | 101.902 | 70.6133 | -0.529172 | 1.01415  | 0.310509  | 0.892668 |
| gene2324 | gene2324 | fosB      | gi 57650036 ref NC_002951.2 :2388865-2389285 | q1 | q2 | OK     | 41.487  | 46.249  | 0.156764  | -0.30129 | 0.763194  | 0.986963 |
| gene2325 | gene2325 | hutG      | gi 57650036 ref NC_002951.2 :2389540-2390476 | q1 | q2 | OK     | 208.339 | 403.073 | 0.952111  | -1.12366 | 0.261155  | 0.875983 |
| gene2326 | gene2326 | SACOL2328 | gi 57650036 ref NC_002951.2 :2390765-2392025 | q1 | q2 | OK     | 57.9667 | 126.318 | 1.12377   | -1.82751 | 0.0676235 | 0.575602 |
| gene2327 | gene2327 | rpiA      | gi 57650036 ref NC_002951.2 :2392090-2392777 | q1 | q2 | OK     | 92.6493 | 65.2948 | -0.504811 | 1.02863  | 0.303654  | 0.892668 |
| gene2328 | gene2328 | SACOL2330 | gi 57650036 ref NC_002951.2 :2392950-2393604 | q1 | q2 | OK     | 89.6569 | 78.5645 | -0.190537 | 0.38954  | 0.696875  | 0.986963 |
| gene2329 | gene2329 | SACOL2331 | gi 57650036 ref NC_002951.2 :2393733-2394859 | q1 | q2 | NOTEST | 0       | 0       | 0         | 0        | 1         | 1        |
| gene233  | gene233  | SACOL0242 | gi 57650036 ref NC_002951.2 :280917-282606   | q1 | q2 | OK     | 160.863 | 104.917 | -0.616574 | 0.75927  | 0.447692  | 0.948742 |
| gene2330 | gene2330 | galM      | gi 57650036 ref NC_002951.2 :2393733-2394859 | q1 | q2 | OK     | 93.884  | 45.0138 | -1.06051  | 2.02679  | 0.0426838 | 0.472836 |
| gene2331 | gene2331 | SACOL2333 | gi 57650036 ref NC_002951.2 :2394888-2395215 | q1 | q2 | OK     | 400.73  | 460.432 | 0.200358  | -0.3807  | 0.703428  | 0.986963 |
| gene2332 | gene2332 | SACOL2334 | gi 57650036 ref NC_002951.2 :2395432-2397557 | q1 | q2 | OK     | 68.6742 | 83.103  | 0.275133  | -0.3287  | 0.742384  | 0.986963 |
| gene2333 | gene2333 | SACOL2335 | gi 57650036 ref NC_002951.2 :2395432-2397557 | q1 | q2 | OK     | 51.8824 | 73.0084 | 0.492817  | -0.44128 | 0.659008  | 0.986963 |
| gene2334 | gene2334 | SACOL2336 | gi 57650036 ref NC_002951.2 :2397626-2397725 | q1 | q2 | NOTEST | 0       | 0       | 0         | 0        | 1         | 1        |
| gene2335 | gene2335 | SACOL2338 | gi 57650036 ref NC_002951.2 :2397787-2398435 | q1 | q2 | OK     | 87.6419 | 88.1037 | 0.0075822 | -0.01547 | 0.987656  | 0.998143 |
| gene2336 | gene2336 | SACOL2339 | gi 57650036 ref NC_002951.2 :2398833-2399442 | q1 | q2 | OK     | 51.5186 | 61.4203 | 0.253623  | -0.52432 | 0.600054  | 0.986963 |
| gene2337 | gene2337 | gltS      | gi 57650036 ref NC_002951.2 :2399778-2400987 | q1 | q2 | OK     | 38.1313 | 47.0332 | 0.302704  | -0.61354 | 0.539521  | 0.978583 |
| gene2338 | gene2338 | fni       | gi 57650036 ref NC_002951.2 :2401034-2402084 | q1 | q2 | OK     | 137.539 | 94.6902 | -0.538549 | 0.87858  | 0.379632  | 0.932987 |
| gene2339 | gene2339 | SACOL2342 | gi 57650036 ref NC_002951.2 :2402114-2403062 | q1 | q2 | OK     | 58.0356 | 44.9285 | -0.369307 | 0.75478  | 0.450379  | 0.948742 |
| gene234  | gene234  | SACOL0243 | gi 57650036 ref NC_002951.2 :282641-284363   | q1 | q2 | OK     | 301.414 | 139.612 | -1.11033  | 1.17985  | 0.238061  | 0.863102 |
| gene2340 | gene2340 | SACOL2343 | gi 57650036 ref NC_002951.2 :2403158-2404066 | q1 | q2 | OK     | 148.626 | 175.715 | 0.241554  | -0.3514  | 0.725286  | 0.986963 |
| gene2341 | gene2341 | SACOL2344 | gi 57650036 ref NC_002951.2 :2403158-2404066 | q1 | q2 | OK     | 100.952 | 123.702 | 0.293206  | -0.31173 | 0.755243  | 0.986963 |
| gene2342 | gene2342 | SACOL2345 | gi 57650036 ref NC_002951.2 :2404173-2405076 | q1 | q2 | OK     | 66.6358 | 42.7781 | -0.639426 | 1.30219  | 0.19285   | 0.819847 |

|          |          |           |                                              |    |    |        |         |         |           |          |           |           |
|----------|----------|-----------|----------------------------------------------|----|----|--------|---------|---------|-----------|----------|-----------|-----------|
| gene2343 | gene2343 | SACOL2346 | gi 57650036 ref NC_002951.2 :2405301-2405940 | q1 | q2 | OK     | 54.1339 | 54.1946 | 0.0016153 | -0.00334 | 0.997332  | 0.998434  |
| gene2344 | gene2344 | SACOL2347 | gi 57650036 ref NC_002951.2 :2406185-2408117 | q1 | q2 | OK     | 50.0323 | 39.3126 | -0.347868 | 0.62562  | 0.531562  | 0.97289   |
| gene2345 | gene2345 | SACOL2348 | gi 57650036 ref NC_002951.2 :2408129-2408777 | q1 | q2 | OK     | 53.5992 | 36.6625 | -0.547905 | 1.12168  | 0.261999  | 0.875983  |
| gene2346 | gene2346 | SACOL2349 | gi 57650036 ref NC_002951.2 :2408897-2409449 | q1 | q2 | OK     | 54.0568 | 73.4058 | 0.441417  | -0.91062 | 0.362496  | 0.925274  |
| gene2347 | gene2347 | tcaB      | gi 57650036 ref NC_002951.2 :2409678-2410887 | q1 | q2 | OK     | 43.1339 | 46.5177 | 0.108959  | -0.21974 | 0.826075  | 0.992769  |
| gene2348 | gene2348 | SACOL2351 | gi 57650036 ref NC_002951.2 :2410996-2411125 | q1 | q2 | NOTEST | 0       | 0       | 0         | 0        | 1         | 1         |
| gene2349 | gene2349 | tcaA      | gi 57650036 ref NC_002951.2 :2411155-2412538 | q1 | q2 | OK     | 42.8548 | 38.5626 | -0.152254 | 0.30458  | 0.760688  | 0.986963  |
| gene235  | gene235  | scdA      | gi 57650036 ref NC_002951.2 :284502-285177   | q1 | q2 | OK     | 101.018 | 94.8227 | -0.091313 | 0.18283  | 0.85493   | 0.996923  |
| gene2350 | gene2350 | tcaR      | gi 57650036 ref NC_002951.2 :2412777-2413233 | q1 | q2 | OK     | 85.8593 | 40.6424 | -1.07899  | 2.15465  | 0.0311896 | 0.418808  |
| gene2351 | gene2351 | SACOL2354 | gi 57650036 ref NC_002951.2 :2413427-2414396 | q1 | q2 | OK     | 74.289  | 63.0701 | -0.236191 | 0.46464  | 0.64219   | 0.986963  |
| gene2352 | gene2352 | SACOL2355 | gi 57650036 ref NC_002951.2 :2414970-2415327 | q1 | q2 | OK     | 16.6216 | 40.191  | 1.27382   | -2.08853 | 0.0367502 | 0.444619  |
| gene2353 | gene2353 | SACOL2356 | gi 57650036 ref NC_002951.2 :2415466-2417187 | q1 | q2 | OK     | 21.8728 | 34.4763 | 0.656468  | -0.77656 | 0.437418  | 0.943654  |
| gene2354 | gene2354 | SACOL2357 | gi 57650036 ref NC_002951.2 :2415466-2417187 | q1 | q2 | OK     | 25.4185 | 35.5867 | 0.48546   | -0.80505 | 0.420794  | 0.939652  |
| gene2355 | gene2355 | SACOL2358 | gi 57650036 ref NC_002951.2 :2417322-2419363 | q1 | q2 | OK     | 79.3063 | 62.857  | -0.335362 | 0.35906  | 0.719554  | 0.986963  |
| gene2356 | gene2356 | SACOL2359 | gi 57650036 ref NC_002951.2 :2417322-2419363 | q1 | q2 | OK     | 52.5775 | 39.298  | -0.41999  | 0.5597   | 0.575684  | 0.985265  |
| gene2357 | gene2357 | SACOL2360 | gi 57650036 ref NC_002951.2 :2419525-2420421 | q1 | q2 | OK     | 63.9465 | 39.9782 | -0.677649 | 1.06918  | 0.284987  | 0.885647  |
| gene2358 | gene2358 | SACOL2361 | gi 57650036 ref NC_002951.2 :2419525-2420421 | q1 | q2 | OK     | 37.8909 | 29.5141 | -0.360449 | 0.47282  | 0.636345  | 0.986963  |
| gene2359 | gene2359 | mqa1      | gi 57650036 ref NC_002951.2 :2420486-2421965 | q1 | q2 | OK     | 327.771 | 260.864 | -0.329387 | 0.33176  | 0.740067  | 0.986963  |
| gene236  | gene236  | lytS      | gi 57650036 ref NC_002951.2 :285423-287178   | q1 | q2 | OK     | 90.4594 | 98.9994 | 0.13015   | -0.17969 | 0.857396  | 0.996923  |
| gene2360 | gene2360 | SACOL2363 | gi 57650036 ref NC_002951.2 :2422345-2423944 | q1 | q2 | OK     | 375.285 | 49.7694 | -2.91466  | 3.47893  | 0.0005034 | 0.0332187 |
| gene2361 | gene2361 | SACOL2364 | gi 57650036 ref NC_002951.2 :2424260-2425934 | q1 | q2 | OK     | 47.0115 | 41.591  | -0.176743 | 0.33383  | 0.738512  | 0.986963  |
| gene2362 | gene2362 | SACOL2365 | gi 57650036 ref NC_002951.2 :2426086-2426716 | q1 | q2 | OK     | 402.646 | 666.375 | 0.726823  | -0.83961 | 0.401128  | 0.939607  |
| gene2363 | gene2363 | SACOL2366 | gi 57650036 ref NC_002951.2 :2427029-2427545 | q1 | q2 | OK     | 168.34  | 156.319 | -0.106885 | 0.20988  | 0.833758  | 0.995988  |
| gene2364 | gene2364 | SACOL2367 | gi 57650036 ref NC_002951.2 :2427735-2428740 | q1 | q2 | OK     | 83.6748 | 81.377  | -0.040171 | 0.07534  | 0.939946  | 0.996932  |
| gene2365 | gene2365 | SACOL2368 | gi 57650036 ref NC_002951.2 :2428785-2429187 | q1 | q2 | OK     | 84.9211 | 98.2759 | 0.210714  | -0.43249 | 0.665387  | 0.986963  |
| gene2366 | gene2366 | SACOL2369 | gi 57650036 ref NC_002951.2 :2429222-2430257 | q1 | q2 | OK     | 106.009 | 99.1495 | -0.096512 | 0.16716  | 0.867247  | 0.996923  |
| gene2367 | gene2367 | SACOL2371 | gi 57650036 ref NC_002951.2 :2430488-2430920 | q1 | q2 | OK     | 72.5858 | 42.9629 | -0.756595 | 1.49782  | 0.134179  | 0.751793  |
| gene2368 | gene2368 | SACOL2372 | gi 57650036 ref NC_002951.2 :2430971-2431064 | q1 | q2 | NOTEST | 0       | 0       | 0         | 0        | 1         | 1         |
| gene2369 | gene2369 | SACOL2373 | gi 57650036 ref NC_002951.2 :2431126-2432404 | q1 | q2 | OK     | 31.484  | 35.9807 | 0.192607  | -0.39613 | 0.692013  | 0.986963  |
| gene237  | gene237  | lytR      | gi 57650036 ref NC_002951.2 :287180-287921   | q1 | q2 | OK     | 20.8231 | 30.3189 | 0.542034  | -1.07581 | 0.282012  | 0.880646  |
| gene2370 | gene2370 | SACOL2374 | gi 57650036 ref NC_002951.2 :2432564-2433188 | q1 | q2 | OK     | 91.5047 | 43.1511 | -1.08445  | 2.2133   | 0.0268769 | 0.377263  |
| gene2371 | gene2371 | SACOL2375 | gi 57650036 ref NC_002951.2 :2433233-2434178 | q1 | q2 | OK     | 80.4614 | 53.4324 | -0.590581 | 1.16779  | 0.242892  | 0.867572  |
| gene2372 | gene2372 | SACOL2376 | gi 57650036 ref NC_002951.2 :2434263-2435706 | q1 | q2 | OK     | 49.9108 | 63.0652 | 0.33749   | -0.62441 | 0.532358  | 0.97289   |

|          |          |           |                                              |    |    |        |         |         |           |          |           |          |
|----------|----------|-----------|----------------------------------------------|----|----|--------|---------|---------|-----------|----------|-----------|----------|
| gene2373 | gene2373 | SACOL2377 | gi 57650036 ref NC_002951.2 :2435888-2436272 | q1 | q2 | OK     | 166.315 | 158.282 | -0.071415 | 0.14757  | 0.882685  | 0.996932 |
| gene2374 | gene2374 | SACOL2378 | gi 57650036 ref NC_002951.2 :2437759-2439865 | q1 | q2 | OK     | 59.3239 | 52.1901 | -0.184837 | 0.29522  | 0.767828  | 0.986963 |
| gene2375 | gene2375 | SACOL2379 | gi 57650036 ref NC_002951.2 :2439935-2440358 | q1 | q2 | OK     | 363.958 | 715.893 | 0.975974  | -1.42621 | 0.153808  | 0.793468 |
| gene2376 | gene2376 | SACOL2380 | gi 57650036 ref NC_002951.2 :2440453-2440576 | q1 | q2 | NOTEST | 0       | 0       | 0         | 0        | 1         | 1        |
| gene2377 | gene2377 | SACOL2381 | gi 57650036 ref NC_002951.2 :2440622-2440979 | q1 | q2 | OK     | 55.4052 | 77.3487 | 0.481355  | -0.93647 | 0.34903   | 0.913467 |
| gene2378 | gene2378 | SACOL2382 | gi 57650036 ref NC_002951.2 :2441382-2442660 | q1 | q2 | OK     | 105.711 | 122.673 | 0.214686  | -0.32017 | 0.748839  | 0.986963 |
| gene2379 | gene2379 | SACOL2383 | gi 57650036 ref NC_002951.2 :2442841-2443207 | q1 | q2 | OK     | 42.8848 | 53.3667 | 0.315473  | -0.5924  | 0.553585  | 0.981439 |
| gene238  | gene238  | lrgA      | gi 57650036 ref NC_002951.2 :288033-289171   | q1 | q2 | OK     | 23.1385 | 31.8814 | 0.462418  | -0.51965 | 0.603308  | 0.986963 |
| gene2380 | gene2380 | sarZ      | gi 57650036 ref NC_002951.2 :2443604-2444051 | q1 | q2 | OK     | 42.8641 | 39.5245 | -0.117022 | 0.22612  | 0.821112  | 0.992727 |
| gene2381 | gene2381 | SACOL2385 | gi 57650036 ref NC_002951.2 :2444266-2444695 | q1 | q2 | OK     | 153.078 | 126.7   | -0.272851 | 0.56197  | 0.57414   | 0.985265 |
| gene2382 | gene2382 | SACOL2386 | gi 57650036 ref NC_002951.2 :2444801-2445971 | q1 | q2 | OK     | 29.3376 | 44.3368 | 0.595754  | -1.22201 | 0.221705  | 0.849926 |
| gene2383 | gene2383 | SACOL2387 | gi 57650036 ref NC_002951.2 :2446340-2447974 | q1 | q2 | OK     | 51.3039 | 69.7071 | 0.442239  | -0.73935 | 0.459697  | 0.950591 |
| gene2384 | gene2384 | SACOL2388 | gi 57650036 ref NC_002951.2 :2446340-2447974 | q1 | q2 | OK     | 20.8231 | 32.2139 | 0.629497  | -0.60648 | 0.544196  | 0.979019 |
| gene2385 | gene2385 | SACOL2389 | gi 57650036 ref NC_002951.2 :2448231-2448885 | q1 | q2 | OK     | 82.265  | 49.1028 | -0.744473 | 1.53054  | 0.125882  | 0.732386 |
| gene2386 | gene2386 | SACOL2390 | gi 57650036 ref NC_002951.2 :2448907-2449942 | q1 | q2 | OK     | 140.456 | 82.7022 | -0.764116 | 1.26918  | 0.204376  | 0.822403 |
| gene2387 | gene2387 | SACOL2391 | gi 57650036 ref NC_002951.2 :2449965-2450418 | q1 | q2 | OK     | 148.278 | 71.9134 | -1.04397  | 2.13113  | 0.0330781 | 0.42162  |
| gene2388 | gene2388 | narI      | gi 57650036 ref NC_002951.2 :2450437-2456914 | q1 | q2 | OK     | 89.0627 | 80.8988 | -0.138703 | 0.06369  | 0.949216  | 0.996932 |
| gene2389 | gene2389 | narJ      | gi 57650036 ref NC_002951.2 :2450437-2456914 | q1 | q2 | OK     | 21.9254 | 20.7282 | -0.081013 | 0.01698  | 0.986451  | 0.998143 |
| gene239  | gene239  | lrgB      | gi 57650036 ref NC_002951.2 :288033-289171   | q1 | q2 | OK     | 28.8564 | 37.4342 | 0.375464  | -0.65056 | 0.515329  | 0.971416 |
| gene2390 | gene2390 | narH      | gi 57650036 ref NC_002951.2 :2450437-2456914 | q1 | q2 | OK     | 34.3256 | 49.2582 | 0.521082  | -0.28018 | 0.779341  | 0.986963 |
| gene2391 | gene2391 | narG      | gi 57650036 ref NC_002951.2 :2450437-2456914 | q1 | q2 | OK     | 35.5558 | 46.2668 | 0.379891  | -0.32313 | 0.746596  | 0.986963 |
| gene2392 | gene2392 | SACOL2396 | gi 57650036 ref NC_002951.2 :2457223-2458506 | q1 | q2 | OK     | 76.7495 | 88.463  | 0.204917  | -0.35427 | 0.723135  | 0.986963 |
| gene2393 | gene2393 | nirD      | gi 57650036 ref NC_002951.2 :2457223-2458506 | q1 | q2 | OK     | 54.7049 | 62.8719 | 0.200745  | -0.12176 | 0.903089  | 0.996932 |
| gene2394 | gene2394 | nirB      | gi 57650036 ref NC_002951.2 :2458509-2460915 | q1 | q2 | OK     | 53.0726 | 60.9112 | 0.19874   | -0.29505 | 0.767955  | 0.986963 |
| gene2395 | gene2395 | nirR      | gi 57650036 ref NC_002951.2 :2460980-2461712 | q1 | q2 | OK     | 82.5705 | 97.5027 | 0.239815  | -0.47846 | 0.632322  | 0.986963 |
| gene2396 | gene2396 | SACOL2400 | gi 57650036 ref NC_002951.2 :2461941-2462478 | q1 | q2 | OK     | 56.2617 | 70.5415 | 0.326318  | -0.67268 | 0.50115   | 0.965124 |
| gene2397 | gene2397 | SACOL2401 | gi 57650036 ref NC_002951.2 :2462710-2463535 | q1 | q2 | OK     | 59.9316 | 61.1497 | 0.0290293 | -0.0595  | 0.952554  | 0.996932 |
| gene2398 | gene2398 | SACOL2402 | gi 57650036 ref NC_002951.2 :2464017-2464485 | q1 | q2 | OK     | 30.9523 | 61.1807 | 0.983028  | -1.91869 | 0.0550236 | 0.538882 |
| gene2399 | gene2399 | SACOL2403 | gi 57650036 ref NC_002951.2 :2464670-2466221 | q1 | q2 | OK     | 37.477  | 40.9802 | 0.128922  | -0.25427 | 0.79929   | 0.989562 |
| gene24   | gene24   | yycJ      | gi 57650036 ref NC_002951.2 :29997-30798     | q1 | q2 | OK     | 66.9654 | 93.8945 | 0.487623  | -0.97033 | 0.331883  | 0.900927 |
| gene240  | gene240  | SACOL0249 | gi 57650036 ref NC_002951.2 :289278-289983   | q1 | q2 | OK     | 69.256  | 101.277 | 0.548292  | -1.10597 | 0.268738  | 0.875983 |
| gene2400 | gene2400 | SACOL2404 | gi 57650036 ref NC_002951.2 :2466515-2467033 | q1 | q2 | OK     | 53.0818 | 54.3187 | 0.0332321 | -0.04134 | 0.967028  | 0.996932 |
| gene2401 | gene2401 | SACOL2405 | gi 57650036 ref NC_002951.2 :2466515-2467033 | q1 | q2 | OK     | 99.9869 | 85.7969 | -0.220813 | 0.33067  | 0.740892  | 0.986963 |

|          |          |           |                                              |    |    |        |         |         |            |           |           |          |
|----------|----------|-----------|----------------------------------------------|----|----|--------|---------|---------|------------|-----------|-----------|----------|
| gene2402 | gene2402 | SACOL2406 | gi 57650036 ref NC_002951.2 :2467197-2467296 | q1 | q2 | NOTEST | 0       | 0       | 0          | 0         | 1         | 1        |
| gene2403 | gene2403 | SACOL2407 | gi 57650036 ref NC_002951.2 :2467305-2467905 | q1 | q2 | OK     | 196.158 | 69.0827 | -1.50562   | 2.85632   | 0.0042858 | 0.131239 |
| gene2404 | gene2404 | SACOL2408 | gi 57650036 ref NC_002951.2 :2467923-2468295 | q1 | q2 | OK     | 184.137 | 153.637 | -0.261257  | 0.53951   | 0.589535  | 0.985265 |
| gene2405 | gene2405 | fmhA      | gi 57650036 ref NC_002951.2 :2468540-2469791 | q1 | q2 | OK     | 31.7355 | 38.9945 | 0.297173   | -0.60997  | 0.541881  | 0.979019 |
| gene2406 | gene2406 | SACOL2410 | gi 57650036 ref NC_002951.2 :2469887-2472095 | q1 | q2 | OK     | 469.543 | 294.434 | -0.673312  | 0.43655   | 0.662441  | 0.986963 |
| gene2407 | gene2407 | SACOL2411 | gi 57650036 ref NC_002951.2 :2469887-2472095 | q1 | q2 | OK     | 310.163 | 246.185 | -0.333287  | 0.18447   | 0.853646  | 0.996923 |
| gene2408 | gene2408 | SACOL2412 | gi 57650036 ref NC_002951.2 :2469887-2472095 | q1 | q2 | OK     | 241.492 | 123.321 | -0.969556  | 0.44662   | 0.655149  | 0.986963 |
| gene2409 | gene2409 | SACOL2413 | gi 57650036 ref NC_002951.2 :2472215-2473613 | q1 | q2 | OK     | 85.2278 | 75.4116 | -0.176537  | 0.29303   | 0.769496  | 0.986963 |
| gene241  | gene241  | SACOL0250 | gi 57650036 ref NC_002951.2 :290131-290923   | q1 | q2 | OK     | 20.7883 | 25.1768 | 0.276325   | -0.54881  | 0.583138  | 0.985265 |
| gene2410 | gene2410 | SACOL2414 | gi 57650036 ref NC_002951.2 :2473829-2473934 | q1 | q2 | OK     | 546.116 | 0       | -1.79769e+ | -1.79769e | 0.201324  | 0.819847 |
| gene2411 | gene2411 | gpmA      | gi 57650036 ref NC_002951.2 :2474087-2474774 | q1 | q2 | OK     | 137.076 | 196.409 | 0.518881   | -0.90668  | 0.364574  | 0.926565 |
| gene2412 | gene2412 | SACOL2416 | gi 57650036 ref NC_002951.2 :2475099-2475966 | q1 | q2 | OK     | 61.2939 | 48.1205 | -0.349091  | 0.71616   | 0.473891  | 0.95963  |
| gene2413 | gene2413 | SACOL2418 | gi 57650036 ref NC_002951.2 :2476717-2478028 | q1 | q2 | OK     | 74.9164 | 54.854  | -0.449684  | 0.82304   | 0.410483  | 0.939607 |
| gene2414 | gene2414 | hlgA      | gi 57650036 ref NC_002951.2 :2478563-2479493 | q1 | q2 | OK     | 34.9463 | 64.7688 | 0.890158   | -1.81423  | 0.0696422 | 0.586817 |
| gene2415 | gene2415 | SACOL2420 | gi 57650036 ref NC_002951.2 :2479556-2479682 | q1 | q2 | NOTEST | 0       | 0       | 0          | 0         | 1         | 1        |
| gene2416 | gene2416 | hlgC      | gi 57650036 ref NC_002951.2 :2480060-2481008 | q1 | q2 | OK     | 55.9576 | 75.86   | 0.439007   | -0.87235  | 0.383016  | 0.936672 |
| gene2417 | gene2417 | hlgB      | gi 57650036 ref NC_002951.2 :2481009-2481987 | q1 | q2 | OK     | 45.5923 | 60.361  | 0.404826   | -0.82282  | 0.410613  | 0.939607 |
| gene2418 | gene2418 | SACOL2423 | gi 57650036 ref NC_002951.2 :2482038-2482506 | q1 | q2 | OK     | 11.994  | 22.2475 | 0.891328   | -1.47903  | 0.139132  | 0.763035 |
| gene2419 | gene2419 | bioW      | gi 57650036 ref NC_002951.2 :2482516-2483209 | q1 | q2 | OK     | 39.5042 | 62.1948 | 0.654789   | -1.35014  | 0.176971  | 0.819812 |
| gene242  | gene242  | bglA      | gi 57650036 ref NC_002951.2 :290938-292375   | q1 | q2 | OK     | 53.4294 | 68.2169 | 0.352494   | -0.63887  | 0.522907  | 0.972546 |
| gene2420 | gene2420 | SACOL2425 | gi 57650036 ref NC_002951.2 :2483219-2485320 | q1 | q2 | OK     | 42.2432 | 56.254  | 0.413237   | -0.55218  | 0.580826  | 0.985265 |
| gene2421 | gene2421 | bioB      | gi 57650036 ref NC_002951.2 :2483219-2485320 | q1 | q2 | OK     | 35.1417 | 49.8345 | 0.50396    | -0.58786  | 0.556629  | 0.981874 |
| gene2422 | gene2422 | bioA      | gi 57650036 ref NC_002951.2 :2485321-2487344 | q1 | q2 | OK     | 29.8263 | 48.0062 | 0.686638   | -1.00798  | 0.313464  | 0.892668 |
| gene2423 | gene2423 | bioD      | gi 57650036 ref NC_002951.2 :2485321-2487344 | q1 | q2 | OK     | 41.748  | 60.0503 | 0.524463   | -0.5798   | 0.562047  | 0.98493  |
| gene2424 | gene2424 | SACOL2429 | gi 57650036 ref NC_002951.2 :2487564-2487708 | q1 | q2 | OK     | 54.7718 | 95.5278 | 0.802488   | -0.58247  | 0.560251  | 0.984802 |
| gene2425 | gene2425 | SACOL2430 | gi 57650036 ref NC_002951.2 :2487795-2489529 | q1 | q2 | OK     | 27.7015 | 41.0054 | 0.56585    | -1.11331  | 0.265575  | 0.875983 |
| gene2426 | gene2426 | SACOL2431 | gi 57650036 ref NC_002951.2 :2489553-2491317 | q1 | q2 | OK     | 29.7172 | 39.1402 | 0.397353   | -0.7805   | 0.435095  | 0.94183  |
| gene2427 | gene2427 | SACOL2433 | gi 57650036 ref NC_002951.2 :2491944-2492052 | q1 | q2 | OK     | 306.492 | 0       | -1.79769e+ | -1.79769e | 0.201324  | 0.819847 |
| gene2428 | gene2428 | SACOL2434 | gi 57650036 ref NC_002951.2 :2492186-2492573 | q1 | q2 | OK     | 96.6094 | 72.4797 | -0.414586  | 0.83978   | 0.401032  | 0.939607 |
| gene2429 | gene2429 | SACOL2435 | gi 57650036 ref NC_002951.2 :2492840-2493983 | q1 | q2 | OK     | 85.2301 | 82.766  | -0.042324  | 0.07547   | 0.939839  | 0.996932 |
| gene243  | gene243  | SACOL0252 | gi 57650036 ref NC_002951.2 :292808-293570   | q1 | q2 | OK     | 32.9556 | 52.5046 | 0.671918   | -1.38345  | 0.166527  | 0.814226 |
| gene2430 | gene2430 | SACOL2436 | gi 57650036 ref NC_002951.2 :2494042-2494702 | q1 | q2 | OK     | 160.399 | 140.747 | -0.188559  | 0.34727   | 0.728388  | 0.986963 |
| gene2431 | gene2431 | bcr       | gi 57650036 ref NC_002951.2 :2494883-2496095 | q1 | q2 | OK     | 162.395 | 82.8712 | -0.970567  | 1.43973   | 0.149942  | 0.788621 |

|          |          |           |                                              |    |    |    |         |         |            |            |           |          |
|----------|----------|-----------|----------------------------------------------|----|----|----|---------|---------|------------|------------|-----------|----------|
| gene2432 | gene2432 | SACOL2438 | gi 57650036 ref NC_002951.2 :2496217-2496691 | q1 | q2 | OK | 79.2709 | 110.762 | 0.482605   | -0.99847   | 0.31805   | 0.892668 |
| gene2433 | gene2433 | SACOL2439 | gi 57650036 ref NC_002951.2 :2496803-2497460 | q1 | q2 | OK | 167.784 | 105.949 | -0.663234  | 1.2453     | 0.213022  | 0.831197 |
| gene2434 | gene2434 | SACOL2440 | gi 57650036 ref NC_002951.2 :2497522-2498329 | q1 | q2 | OK | 57.9982 | 78.7997 | 0.442182   | -0.89712   | 0.369655  | 0.928204 |
| gene2435 | gene2435 | SACOL2441 | gi 57650036 ref NC_002951.2 :2498614-2500024 | q1 | q2 | OK | 152.783 | 101.398 | -0.591464  | 0.80346    | 0.421709  | 0.939652 |
| gene2436 | gene2436 | SACOL2442 | gi 57650036 ref NC_002951.2 :2500161-2502240 | q1 | q2 | OK | 71.9652 | 42.9603 | -0.744295  | 1.17545    | 0.239815  | 0.863954 |
| gene2437 | gene2437 | SACOL2443 | gi 57650036 ref NC_002951.2 :2502379-2504209 | q1 | q2 | OK | 199.127 | 54.5116 | -1.86905   | 2.35425    | 0.01856   | 0.315668 |
| gene2438 | gene2438 | SACOL2445 | gi 57650036 ref NC_002951.2 :2504440-2505937 | q1 | q2 | OK | 51.4503 | 53.4305 | 0.0544858  | -0.10187   | 0.918864  | 0.996932 |
| gene2439 | gene2439 | SACOL2446 | gi 57650036 ref NC_002951.2 :2506028-2506880 | q1 | q2 | OK | 97.3467 | 67.5744 | -0.526656  | 1.02827    | 0.303821  | 0.892668 |
| gene244  | gene244  | rbsK      | gi 57650036 ref NC_002951.2 :293820-294735   | q1 | q2 | OK | 113.302 | 106.728 | -0.086244  | 0.1537     | 0.877845  | 0.996932 |
| gene2440 | gene2440 | SACOL2448 | gi 57650036 ref NC_002951.2 :2507201-2508137 | q1 | q2 | OK | 81.2551 | 49.6819 | -0.709737  | 1.4078     | 0.159191  | 0.801753 |
| gene2441 | gene2441 | SACOL2449 | gi 57650036 ref NC_002951.2 :2508362-2509763 | q1 | q2 | OK | 77.6067 | 88.3606 | 0.187222   | -0.30642   | 0.759284  | 0.986963 |
| gene2442 | gene2442 | SACOL2450 | gi 57650036 ref NC_002951.2 :2510056-2511693 | q1 | q2 | OK | 69.3421 | 65.6958 | -0.077929  | 0.07221    | 0.942438  | 0.996932 |
| gene2443 | gene2443 | SACOL2451 | gi 57650036 ref NC_002951.2 :2510056-2511693 | q1 | q2 | OK | 89.2999 | 95.2695 | 0.0933564  | -0.12278   | 0.902281  | 0.996932 |
| gene2444 | gene2444 | SACOL2452 | gi 57650036 ref NC_002951.2 :2511709-2513568 | q1 | q2 | OK | 57.7013 | 60.9712 | 0.0795261  | -0.04975   | 0.960321  | 0.996932 |
| gene2445 | gene2445 | SACOL2453 | gi 57650036 ref NC_002951.2 :2511709-2513568 | q1 | q2 | OK | 115.288 | 99.2835 | -0.215622  | 0.27494    | 0.783366  | 0.986963 |
| gene2446 | gene2446 | SACOL2454 | gi 57650036 ref NC_002951.2 :2513894-2514014 | q1 | q2 | OK | 153.189 | 145.199 | -0.077277  | 0.03837    | 0.969393  | 0.996932 |
| gene2447 | gene2447 | SACOL2456 | gi 57650036 ref NC_002951.2 :2514237-2515000 | q1 | q2 | OK | 117.265 | 74.153  | -0.661199  | 1.33885    | 0.180621  | 0.819812 |
| gene2448 | gene2448 | SACOL2457 | gi 57650036 ref NC_002951.2 :2514237-2515000 | q1 | q2 | OK | 0       | 33.4694 | 1.79769e+3 | 1.79769e+3 | 0.318085  | 0.892668 |
| gene2449 | gene2449 | SACOL2458 | gi 57650036 ref NC_002951.2 :2515016-2516654 | q1 | q2 | OK | 114.507 | 48.1631 | -1.24944   | 1.89639    | 0.0579087 | 0.540443 |
| gene245  | gene245  | SACOL0254 | gi 57650036 ref NC_002951.2 :294762-295167   | q1 | q2 | OK | 68.151  | 42.8249 | -0.670287  | 1.30677    | 0.19129   | 0.819847 |
| gene2450 | gene2450 | pnbA      | gi 57650036 ref NC_002951.2 :2517261-2518614 | q1 | q2 | OK | 113.856 | 139.898 | 0.297168   | -0.41095   | 0.681111  | 0.986963 |
| gene2451 | gene2451 | SACOL2460 | gi 57650036 ref NC_002951.2 :2518675-2519863 | q1 | q2 | OK | 38.0096 | 48.4103 | 0.34895    | -0.70748   | 0.47927   | 0.960423 |
| gene2452 | gene2452 | SACOL2461 | gi 57650036 ref NC_002951.2 :2520258-2521690 | q1 | q2 | OK | 65.8061 | 81.4421 | 0.307554   | -0.32255   | 0.74704   | 0.986963 |
| gene2453 | gene2453 | SACOL2462 | gi 57650036 ref NC_002951.2 :2520258-2521690 | q1 | q2 | OK | 100.664 | 148.128 | 0.55729    | -0.68308   | 0.494556  | 0.964002 |
| gene2454 | gene2454 | pepA2     | gi 57650036 ref NC_002951.2 :2521937-2523014 | q1 | q2 | OK | 150.383 | 129.836 | -0.211955  | 0.31551    | 0.752371  | 0.986963 |
| gene2455 | gene2455 | SACOL2464 | gi 57650036 ref NC_002951.2 :2523368-2523892 | q1 | q2 | OK | 133.294 | 72.9423 | -0.869788  | 1.23864    | 0.215479  | 0.836273 |
| gene2456 | gene2456 | SACOL2465 | gi 57650036 ref NC_002951.2 :2523368-2523892 | q1 | q2 | OK | 131.003 | 89.7962 | -0.544873  | 0.77589    | 0.437816  | 0.943654 |
| gene2457 | gene2457 | SACOL2466 | gi 57650036 ref NC_002951.2 :2523997-2524192 | q1 | q2 | OK | 10.9302 | 28.1222 | 1.3634     | -1.0809    | 0.279741  | 0.879877 |
| gene2458 | gene2458 | SACOL2467 | gi 57650036 ref NC_002951.2 :2524250-2524706 | q1 | q2 | OK | 180.99  | 67.2534 | -1.42823   | 2.87124    | 0.0040887 | 0.129958 |
| gene2459 | gene2459 | SACOL2469 | gi 57650036 ref NC_002951.2 :2524873-2526451 | q1 | q2 | OK | 71.4662 | 87.1988 | 0.287047   | -0.452     | 0.651271  | 0.986963 |
| gene246  | gene246  | SACOL0255 | gi 57650036 ref NC_002951.2 :295181-296063   | q1 | q2 | OK | 65.0313 | 67.3231 | 0.0499686  | -0.10067   | 0.919812  | 0.996932 |
| gene2460 | gene2460 | SACOL2470 | gi 57650036 ref NC_002951.2 :2526645-2527395 | q1 | q2 | OK | 32.2434 | 35.6657 | 0.145535   | -0.2976    | 0.766008  | 0.986963 |
| gene2461 | gene2461 | SACOL2471 | gi 57650036 ref NC_002951.2 :2527618-2528812 | q1 | q2 | OK | 36.9975 | 49.5615 | 0.421795   | -0.85394   | 0.39314   | 0.939607 |

|          |          |           |                                              |    |    |        |         |         |            |            |           |           |
|----------|----------|-----------|----------------------------------------------|----|----|--------|---------|---------|------------|------------|-----------|-----------|
| gene2462 | gene2462 | SACOL2472 | gi 57650036 ref NC_002951.2 :2528823-2532179 | q1 | q2 | OK     | 22.6898 | 30.7704 | 0.439501   | -0.26666   | 0.789729  | 0.986986  |
| gene2463 | gene2463 | SACOL2473 | gi 57650036 ref NC_002951.2 :2528823-2532179 | q1 | q2 | OK     | 21.6254 | 29.4432 | 0.445209   | -0.27875   | 0.780434  | 0.986963  |
| gene2464 | gene2464 | SACOL2474 | gi 57650036 ref NC_002951.2 :2528823-2532179 | q1 | q2 | OK     | 62.8459 | 75.8102 | 0.270572   | -0.29131   | 0.770815  | 0.986963  |
| gene2465 | gene2465 | SACOL2475 | gi 57650036 ref NC_002951.2 :2528823-2532179 | q1 | q2 | OK     | 33.6176 | 37.2175 | 0.146767   | -0.11811   | 0.90598   | 0.996932  |
| gene2466 | gene2466 | SACOL2476 | gi 57650036 ref NC_002951.2 :2532191-2533790 | q1 | q2 | OK     | 43.3333 | 47.1549 | 0.121932   | -0.23208   | 0.816474  | 0.991377  |
| gene2467 | gene2467 | SACOL2477 | gi 57650036 ref NC_002951.2 :2533932-2535147 | q1 | q2 | OK     | 21.5537 | 29.5932 | 0.457327   | -0.94544   | 0.344434  | 0.906576  |
| gene2468 | gene2468 | SACOL2478 | gi 57650036 ref NC_002951.2 :2535226-2536045 | q1 | q2 | OK     | 21.8813 | 32.8375 | 0.585646   | -1.18343   | 0.236639  | 0.863102  |
| gene2469 | gene2469 | SACOL2479 | gi 57650036 ref NC_002951.2 :2536055-2536877 | q1 | q2 | OK     | 20.7183 | 29.7875 | 0.5238     | -1.05244   | 0.292599  | 0.891156  |
| gene247  | gene247  | SACOL0257 | gi 57650036 ref NC_002951.2 :296294-297293   | q1 | q2 | OK     | 106.151 | 102.712 | -0.047511  | 0.08306    | 0.933802  | 0.996932  |
| gene2470 | gene2470 | SACOL2480 | gi 57650036 ref NC_002951.2 :2537024-2537156 | q1 | q2 | NOTEST | 0       | 0       | 0          | 0          | 1         | 1         |
| gene2471 | gene2471 | SACOL2481 | gi 57650036 ref NC_002951.2 :2537619-2537985 | q1 | q2 | OK     | 44.6472 | 74.2807 | 0.734417   | -1.41141   | 0.158124  | 0.800504  |
| gene2472 | gene2472 | fabG2     | gi 57650036 ref NC_002951.2 :2538247-2539066 | q1 | q2 | OK     | 177.185 | 284.315 | 0.68223    | -0.95016   | 0.342032  | 0.905587  |
| gene2473 | gene2473 | SACOL2483 | gi 57650036 ref NC_002951.2 :2539298-2540837 | q1 | q2 | OK     | 98.142  | 90.1936 | -0.121845  | 0.18006    | 0.857109  | 0.996923  |
| gene2474 | gene2474 | SACOL2484 | gi 57650036 ref NC_002951.2 :2540948-2541371 | q1 | q2 | OK     | 247.345 | 490.285 | 0.987093   | -1.67218   | 0.0944898 | 0.662748  |
| gene2475 | gene2475 | SACOL2485 | gi 57650036 ref NC_002951.2 :2541822-2542242 | q1 | q2 | OK     | 93.5761 | 196.697 | 1.07177    | -2.18618   | 0.0288026 | 0.393061  |
| gene2476 | gene2476 | SACOL2486 | gi 57650036 ref NC_002951.2 :2542259-2542679 | q1 | q2 | OK     | 46.0966 | 182.767 | 1.98727    | -3.94486   | 7.98E-05  | 0.0111385 |
| gene2477 | gene2477 | SACOL2487 | gi 57650036 ref NC_002951.2 :2542945-2543368 | q1 | q2 | OK     | 8.1993  | 20.91   | 1.35062    | -2.02253   | 0.043122  | 0.472836  |
| gene2478 | gene2478 | SACOL2488 | gi 57650036 ref NC_002951.2 :2543618-2544314 | q1 | q2 | OK     | 184.546 | 257.373 | 0.479878   | -0.7451    | 0.456209  | 0.950521  |
| gene2479 | gene2479 | SACOL2489 | gi 57650036 ref NC_002951.2 :2544761-2544884 | q1 | q2 | OK     | 60.4721 | 0       | -1.79769e+ | -1.79769e+ | 0.201324  | 0.819847  |
| gene248  | gene248  | SACOL0258 | gi 57650036 ref NC_002951.2 :297443-297623   | q1 | q2 | OK     | 189.673 | 177.653 | -0.094451  | 0.14558    | 0.884255  | 0.996932  |
| gene2480 | gene2480 | SACOL2491 | gi 57650036 ref NC_002951.2 :2545143-2545335 | q1 | q2 | OK     | 168.375 | 54.9801 | -1.6147    | 2.1517     | 0.0314211 | 0.419308  |
| gene2481 | gene2481 | SACOL2492 | gi 57650036 ref NC_002951.2 :2545769-2545892 | q1 | q2 | NOTEST | 0       | 0       | 0          | 0          | 1         | 1         |
| gene2482 | gene2482 | SACOL2493 | gi 57650036 ref NC_002951.2 :2545895-2546690 | q1 | q2 | OK     | 31.9566 | 36.9323 | 0.208771   | -0.42916   | 0.66781   | 0.986963  |
| gene2483 | gene2483 | SACOL2494 | gi 57650036 ref NC_002951.2 :2547225-2547513 | q1 | q2 | NOTEST | 0       | 0       | 0          | 0          | 1         | 1         |
| gene2484 | gene2484 | SACOL2495 | gi 57650036 ref NC_002951.2 :2547515-2547842 | q1 | q2 | NOTEST | 0       | 0       | 0          | 0          | 1         | 1         |
| gene2485 | gene2485 | SACOL2496 | gi 57650036 ref NC_002951.2 :2548053-2549948 | q1 | q2 | NOTEST | 0       | 0       | 0          | 0          | 1         | 1         |
| gene2486 | gene2486 | SACOL2497 | gi 57650036 ref NC_002951.2 :2548053-2549948 | q1 | q2 | NOTEST | 0       | 0       | 0          | 0          | 1         | 1         |
| gene2487 | gene2487 | SACOL2498 | gi 57650036 ref NC_002951.2 :2550059-2550836 | q1 | q2 | OK     | 42.4126 | 56.5199 | 0.414267   | -0.85728   | 0.39129   | 0.939607  |
| gene2488 | gene2488 | SACOL2499 | gi 57650036 ref NC_002951.2 :2551138-2554000 | q1 | q2 | OK     | 35.3711 | 40.4752 | 0.194467   | -0.31797   | 0.750509  | 0.986963  |
| gene2489 | gene2489 | SACOL2500 | gi 57650036 ref NC_002951.2 :2554001-2554394 | q1 | q2 | OK     | 57.3413 | 102.478 | 0.837662   | -1.68405   | 0.0921716 | 0.659441  |
| gene249  | gene249  | SACOL0259 | gi 57650036 ref NC_002951.2 :297672-298065   | q1 | q2 | OK     | 30.9953 | 33.9496 | 0.131346   | -0.23673   | 0.812866  | 0.991128  |
| gene2490 | gene2490 | SACOL2501 | gi 57650036 ref NC_002951.2 :2554510-2556319 | q1 | q2 | OK     | 40.6033 | 65.2991 | 0.685464   | -1.18636   | 0.235479  | 0.863102  |
| gene2491 | gene2491 | SACOL2502 | gi 57650036 ref NC_002951.2 :2556602-2556869 | q1 | q2 | OK     | 42.4654 | 138.125 | 1.70161    | -2.99916   | 0.0027073 | 0.101128  |

|          |          |           |                                              |    |    |        |         |         |           |          |           |          |
|----------|----------|-----------|----------------------------------------------|----|----|--------|---------|---------|-----------|----------|-----------|----------|
| gene2492 | gene2492 | SACOL2503 | gi 57650036 ref NC_002951.2 :2557012-2557321 | q1 | q2 | OK     | 14.0556 | 45.9828 | 1.70995   | -2.5609  | 0.0104402 | 0.238321 |
| gene2493 | gene2493 | SACOL2504 | gi 57650036 ref NC_002951.2 :2557642-2558836 | q1 | q2 | OK     | 51.9995 | 78.8538 | 0.600684  | -1.1286  | 0.259065  | 0.875983 |
| gene2494 | gene2494 | SACOL2505 | gi 57650036 ref NC_002951.2 :2559219-2562951 | q1 | q2 | OK     | 62.7139 | 57.1585 | -0.133819 | 0.16029  | 0.872655  | 0.996923 |
| gene2495 | gene2495 | sarT      | gi 57650036 ref NC_002951.2 :2563255-2563612 | q1 | q2 | OK     | 9.2342  | 25.0246 | 1.43829   | -2.05692 | 0.0396935 | 0.459329 |
| gene2496 | gene2496 | sarU      | gi 57650036 ref NC_002951.2 :2563935-2564679 | q1 | q2 | OK     | 13.8766 | 20.2617 | 0.546094  | -1.03067 | 0.302698  | 0.892668 |
| gene2497 | gene2497 | galU      | gi 57650036 ref NC_002951.2 :2564889-2565756 | q1 | q2 | OK     | 95.254  | 53.7249 | -0.826188 | 1.62637  | 0.103871  | 0.689999 |
| gene2498 | gene2498 | fnbB      | gi 57650036 ref NC_002951.2 :2565935-2568758 | q1 | q2 | OK     | 69.4297 | 79.2409 | 0.190691  | -0.2354  | 0.813901  | 0.991128 |
| gene2499 | gene2499 | SACOL2510 | gi 57650036 ref NC_002951.2 :2568918-2569041 | q1 | q2 | NOTEST | 0       | 0       | 0         | 0        | 1         | 1        |
| gene25   | gene25   | SACOL0024 | gi 57650036 ref NC_002951.2 :31025-33344     | q1 | q2 | OK     | 47.8003 | 51.9391 | 0.1198    | -0.19198 | 0.847758  | 0.996923 |
| gene250  | gene250  | SACOL0260 | gi 57650036 ref NC_002951.2 :298292-298697   | q1 | q2 | NOTEST | 0       | 0       | 0         | 0        | 1         | 1        |
| gene2500 | gene2500 | fnbA      | gi 57650036 ref NC_002951.2 :2569439-2572496 | q1 | q2 | OK     | 101.51  | 112.268 | 0.145326  | -0.15435 | 0.877335  | 0.996932 |
| gene2501 | gene2501 | SACOL2513 | gi 57650036 ref NC_002951.2 :2572737-2572932 | q1 | q2 | OK     | 3.64339 | 11.2489 | 1.62643   | -0.78707 | 0.431241  | 0.940181 |
| gene2502 | gene2502 | gntP      | gi 57650036 ref NC_002951.2 :2572963-2574322 | q1 | q2 | OK     | 82.8724 | 65.4324 | -0.340886 | 0.59007  | 0.555146  | 0.98167  |
| gene2503 | gene2503 | gntK      | gi 57650036 ref NC_002951.2 :2574438-2575992 | q1 | q2 | OK     | 33.3057 | 37.1294 | 0.156796  | -0.31426 | 0.753326  | 0.986963 |
| gene2504 | gene2504 | gntR      | gi 57650036 ref NC_002951.2 :2576015-2576696 | q1 | q2 | OK     | 37.0425 | 46.1771 | 0.317996  | -0.65272 | 0.513938  | 0.971029 |
| gene2505 | gene2505 | SACOL2517 | gi 57650036 ref NC_002951.2 :2576849-2577614 | q1 | q2 | OK     | 113.309 | 101.743 | -0.155331 | 0.29661  | 0.766764  | 0.986963 |
| gene2506 | gene2506 | SACOL2518 | gi 57650036 ref NC_002951.2 :2577778-2578471 | q1 | q2 | OK     | 50.3182 | 70.2284 | 0.480974  | -0.99411 | 0.320169  | 0.894022 |
| gene2507 | gene2507 | SACOL2519 | gi 57650036 ref NC_002951.2 :2578701-2579190 | q1 | q2 | OK     | 572.607 | 1021.01 | 0.834382  | -0.95818 | 0.337971  | 0.905587 |
| gene2508 | gene2508 | SACOL2520 | gi 57650036 ref NC_002951.2 :2579256-2581149 | q1 | q2 | OK     | 50.6949 | 104.312 | 1.04099   | -1.51852 | 0.128884  | 0.738783 |
| gene2509 | gene2509 | SACOL2521 | gi 57650036 ref NC_002951.2 :2581557-2582835 | q1 | q2 | OK     | 452.348 | 167.105 | -1.43668  | 1.55163  | 0.12075   | 0.725365 |
| gene251  | gene251  | SACOL0261 | gi 57650036 ref NC_002951.2 :298737-300114   | q1 | q2 | OK     | 62.8789 | 61.0136 | -0.043445 | 0.07964  | 0.936524  | 0.996932 |
| gene2510 | gene2510 | SACOL2522 | gi 57650036 ref NC_002951.2 :2583381-2583993 | q1 | q2 | OK     | 79.3649 | 116.13  | 0.549162  | -1.11454 | 0.265046  | 0.875983 |
| gene2511 | gene2511 | SACOL2523 | gi 57650036 ref NC_002951.2 :2584089-2585710 | q1 | q2 | OK     | 22.3102 | 40.9691 | 0.876835  | -1.6058  | 0.108319  | 0.711606 |
| gene2512 | gene2512 | SACOL2524 | gi 57650036 ref NC_002951.2 :2584089-2585710 | q1 | q2 | OK     | 18.3689 | 32.3206 | 0.815185  | -0.72399 | 0.469071  | 0.955262 |
| gene2513 | gene2513 | SACOL2525 | gi 57650036 ref NC_002951.2 :2586137-2586833 | q1 | q2 | OK     | 34.671  | 41.9938 | 0.276446  | -0.56578 | 0.571545  | 0.985265 |
| gene2514 | gene2514 | SACOL2526 | gi 57650036 ref NC_002951.2 :2586834-2587605 | q1 | q2 | OK     | 27.4685 | 31.92   | 0.216683  | -0.43969 | 0.660159  | 0.986963 |
| gene2515 | gene2515 | SACOL2527 | gi 57650036 ref NC_002951.2 :2587977-2589942 | q1 | q2 | OK     | 112.129 | 190.846 | 0.767246  | -0.8565  | 0.391722  | 0.939607 |
| gene2516 | gene2516 | SACOL2528 | gi 57650036 ref NC_002951.2 :2590285-2591365 | q1 | q2 | OK     | 78.0534 | 61.6059 | -0.341394 | 0.65145  | 0.514758  | 0.971416 |
| gene2517 | gene2517 | SACOL2529 | gi 57650036 ref NC_002951.2 :2591469-2592063 | q1 | q2 | OK     | 53.8822 | 80.0574 | 0.571226  | -1.18028 | 0.237889  | 0.863102 |
| gene2518 | gene2518 | SACOL2530 | gi 57650036 ref NC_002951.2 :2592084-2593053 | q1 | q2 | OK     | 70.5312 | 89.98   | 0.351344  | -0.66971 | 0.50304   | 0.965124 |
| gene2519 | gene2519 | SACOL2531 | gi 57650036 ref NC_002951.2 :2593130-2593565 | q1 | q2 | OK     | 77.4207 | 46.1209 | -0.747298 | 1.49126  | 0.135894  | 0.754931 |
| gene252  | gene252  | SACOL0262 | gi 57650036 ref NC_002951.2 :300347-301340   | q1 | q2 | OK     | 47.5685 | 46.8401 | -0.022265 | 0.0457   | 0.963553  | 0.996932 |
| gene2520 | gene2520 | SACOL2532 | gi 57650036 ref NC_002951.2 :2593791-2594076 | q1 | q2 | OK     | 55.8662 | 104.217 | 0.899547  | -1.65947 | 0.0970216 | 0.671133 |



|          |          |             |                                              |    |    |        |         |         |           |          |           |           |
|----------|----------|-------------|----------------------------------------------|----|----|--------|---------|---------|-----------|----------|-----------|-----------|
| gene2521 | gene2521 | SACOL2533   | gi 57650036 ref NC_002951.2 :2594246-2595053 | q1 | q2 | OK     | 272.591 | 239.153 | -0.188807 | 0.25227  | 0.800835  | 0.989625  |
| gene2522 | gene2522 | frp         | gi 57650036 ref NC_002951.2 :2595172-2595844 | q1 | q2 | OK     | 493.162 | 409.454 | -0.26836  | 0.31608  | 0.751945  | 0.986963  |
| gene2523 | gene2523 | SACOL2535   | gi 57650036 ref NC_002951.2 :2596113-2597106 | q1 | q2 | OK     | 1154.13 | 970.911 | -0.249399 | 0.22654  | 0.820778  | 0.992727  |
| gene2524 | gene2524 | SACOL2536   | gi 57650036 ref NC_002951.2 :2597354-2598155 | q1 | q2 | OK     | 61.8424 | 77.2116 | 0.320222  | -0.64988 | 0.515768  | 0.971416  |
| gene2525 | gene2525 | SACOL2537   | gi 57650036 ref NC_002951.2 :2598475-2599111 | q1 | q2 | OK     | 12.8775 | 20.7127 | 0.685661  | -1.24487 | 0.213178  | 0.831197  |
| gene2526 | gene2526 | SACOL2538   | gi 57650036 ref NC_002951.2 :2599116-2599848 | q1 | q2 | OK     | 28.7559 | 28.6489 | -0.005376 | 0.01082  | 0.991369  | 0.998143  |
| gene2527 | gene2527 | srtA        | gi 57650036 ref NC_002951.2 :2600007-2600628 | q1 | q2 | OK     | 252.797 | 189.776 | -0.41368  | 0.68374  | 0.494141  | 0.964002  |
| gene2528 | gene2528 | SACOL2541   | gi 57650036 ref NC_002951.2 :2600821-2601313 | q1 | q2 | OK     | 44.7667 | 47.0283 | 0.0711023 | -0.1417  | 0.887316  | 0.996932  |
| gene2529 | gene2529 | SACOL2542   | gi 57650036 ref NC_002951.2 :2601750-2601921 | q1 | q2 | OK     | 61.2807 | 11.1565 | -2.45755  | 1.41768  | 0.156284  | 0.797219  |
| gene253  | gene253  | lytM        | gi 57650036 ref NC_002951.2 :301647-302616   | q1 | q2 | OK     | 106.664 | 166.673 | 0.643951  | -1.0234  | 0.306118  | 0.892668  |
| gene2530 | gene2530 | SACOL2543   | gi 57650036 ref NC_002951.2 :2601982-2602081 | q1 | q2 | NOTEST | 0       | 0       | 0         | 0        | 1         | 1         |
| gene2531 | gene2531 | sdaAA       | gi 57650036 ref NC_002951.2 :2602099-2602999 | q1 | q2 | OK     | 71.3383 | 58.9967 | -0.274043 | 0.55073  | 0.581821  | 0.985265  |
| gene2532 | gene2532 | sdaAB       | gi 57650036 ref NC_002951.2 :2603012-2603693 | q1 | q2 | OK     | 51.0463 | 60.5079 | 0.245315  | -0.50837 | 0.611191  | 0.986963  |
| gene2533 | gene2533 | SACOL2546   | gi 57650036 ref NC_002951.2 :2603695-2604739 | q1 | q2 | OK     | 36.7347 | 40.9958 | 0.158333  | -0.32723 | 0.743497  | 0.986963  |
| gene2534 | gene2534 | SACOL2547   | gi 57650036 ref NC_002951.2 :2605290-2605494 | q1 | q2 | OK     | 20.7632 | 17.7489 | -0.226302 | 0.20626  | 0.83659   | 0.996923  |
| gene2535 | gene2535 | SACOL2548   | gi 57650036 ref NC_002951.2 :2605649-2606612 | q1 | q2 | OK     | 81.6948 | 102.536 | 0.327807  | -0.60449 | 0.545516  | 0.979019  |
| gene2536 | gene2536 | SACOL2549   | gi 57650036 ref NC_002951.2 :2606693-2607662 | q1 | q2 | OK     | 224.89  | 156.582 | -0.522303 | 0.71953  | 0.471816  | 0.958312  |
| gene2537 | gene2537 | SACOL2550   | gi 57650036 ref NC_002951.2 :2607794-2608139 | q1 | q2 | OK     | 128.237 | 66.7656 | -0.941636 | 1.8743   | 0.0608895 | 0.549977  |
| gene2538 | gene2538 | SACOL2551   | gi 57650036 ref NC_002951.2 :2608180-2608591 | q1 | q2 | OK     | 167.344 | 93.8254 | -0.834769 | 1.71209  | 0.0868801 | 0.638501  |
| gene2539 | gene2539 | SACOL2552   | gi 57650036 ref NC_002951.2 :2608970-2611037 | q1 | q2 | OK     | 67.4257 | 45.4798 | -0.568073 | 0.90791  | 0.363927  | 0.926565  |
| gene254  | gene254  | SACOL0264   | gi 57650036 ref NC_002951.2 :302667-303327   | q1 | q2 | OK     | 37.921  | 45.9921 | 0.278389  | -0.57043 | 0.568385  | 0.985265  |
| gene2540 | gene2540 | SACOL2553   | gi 57650036 ref NC_002951.2 :2611337-2613077 | q1 | q2 | OK     | 131.208 | 208.568 | 0.66866   | -0.74894 | 0.453894  | 0.949773  |
| gene2541 | gene2541 | SACOL2554   | gi 57650036 ref NC_002951.2 :2613123-2614201 | q1 | q2 | OK     | 153.6   | 258.592 | 0.751501  | -1.1384  | 0.254954  | 0.875983  |
| gene2542 | gene2542 | SACOL2554.1 | gi 57650036 ref NC_002951.2 :2613123-2614201 | q1 | q2 | OK     | 28.0365 | 34.0925 | 0.282148  | -0.10746 | 0.914427  | 0.996932  |
| gene2543 | gene2543 | SACOL2555   | gi 57650036 ref NC_002951.2 :2614413-2615298 | q1 | q2 | OK     | 36.8204 | 44.4393 | 0.271331  | -0.56218 | 0.573996  | 0.985265  |
| gene2544 | gene2544 | SACOL2556   | gi 57650036 ref NC_002951.2 :2615458-2615677 | q1 | q2 | OK     | 3335.71 | 697.257 | -2.25823  | 3.50982  | 0.0004484 | 0.0321701 |
| gene2545 | gene2545 | SACOL2557   | gi 57650036 ref NC_002951.2 :2616065-2616497 | q1 | q2 | OK     | 38.7124 | 56.7535 | 0.551913  | -1.07476 | 0.282484  | 0.880646  |
| gene2546 | gene2546 | SACOL2559   | gi 57650036 ref NC_002951.2 :2617256-2617514 | q1 | q2 | OK     | 79.1206 | 25.9027 | -1.61095  | 2.44845  | 0.0143474 | 0.279274  |
| gene2547 | gene2547 | SACOL2560   | gi 57650036 ref NC_002951.2 :2618092-2619370 | q1 | q2 | OK     | 108.213 | 104.682 | -0.047859 | 0.07363  | 0.941306  | 0.996932  |
| gene2548 | gene2548 | SACOL2561   | gi 57650036 ref NC_002951.2 :2619623-2620790 | q1 | q2 | OK     | 161.726 | 59.7885 | -1.43561  | 2.23403  | 0.025481  | 0.368182  |
| gene2549 | gene2549 | ogt         | gi 57650036 ref NC_002951.2 :2620959-2621481 | q1 | q2 | OK     | 507.899 | 243.973 | -1.05782  | 1.55176  | 0.120719  | 0.725365  |
| gene255  | gene255  | SACOL0265   | gi 57650036 ref NC_002951.2 :303340-305424   | q1 | q2 | OK     | 24.7553 | 34.2121 | 0.466771  | -0.59777 | 0.549996  | 0.979019  |
| gene2550 | gene2550 | SACOL2563   | gi 57650036 ref NC_002951.2 :2621889-2623995 | q1 | q2 | OK     | 93.3427 | 190.401 | 1.02843   | -1.15484 | 0.248154  | 0.869586  |

|          |          |           |                                              |    |    |        |         |         |             |           |           |          |
|----------|----------|-----------|----------------------------------------------|----|----|--------|---------|---------|-------------|-----------|-----------|----------|
| gene2551 | gene2551 | feoB      | gi 57650036 ref NC_002951.2 :2624246-2626241 | q1 | q2 | OK     | 52.2311 | 56.9191 | 0.124001    | -0.20498  | 0.837589  | 0.996923 |
| gene2552 | gene2552 | SACOL2565 | gi 57650036 ref NC_002951.2 :2626252-2626480 | q1 | q2 | OK     | 44.1206 | 16.1485 | -1.45005    | 1.67814   | 0.0933197 | 0.660073 |
| gene2553 | gene2553 | SACOL2566 | gi 57650036 ref NC_002951.2 :2626695-2629185 | q1 | q2 | OK     | 34.4663 | 31.0664 | -0.149834   | 0.27298   | 0.784871  | 0.986986 |
| gene2554 | gene2554 | SACOL2567 | gi 57650036 ref NC_002951.2 :2629392-2629878 | q1 | q2 | OK     | 18.2459 | 21.3633 | 0.227566    | -0.3998   | 0.689301  | 0.986963 |
| gene2555 | gene2555 | SACOL2568 | gi 57650036 ref NC_002951.2 :2629954-2630122 | q1 | q2 | OK     | 44.8521 | 0       | -1.79769e+1 | -1.79769e | 0.0274133 | 0.380118 |
| gene2556 | gene2556 | SACOL2569 | gi 57650036 ref NC_002951.2 :2630233-2631778 | q1 | q2 | OK     | 376.573 | 213.182 | -0.820846   | 0.82884   | 0.407194  | 0.939607 |
| gene2557 | gene2557 | SACOL2570 | gi 57650036 ref NC_002951.2 :2631967-2632567 | q1 | q2 | OK     | 75.6723 | 50.7029 | -0.577698   | 1.19154   | 0.233442  | 0.863102 |
| gene2558 | gene2558 | SACOL2571 | gi 57650036 ref NC_002951.2 :2632805-2632997 | q1 | q2 | OK     | 113.555 | 54.9801 | -1.04641    | 1.35365   | 0.175848  | 0.819812 |
| gene2559 | gene2559 | SACOL2572 | gi 57650036 ref NC_002951.2 :2633236-2635645 | q1 | q2 | OK     | 152.863 | 113.52  | -0.429295   | 0.46224   | 0.643913  | 0.986963 |
| gene256  | gene256  | SACOL0266 | gi 57650036 ref NC_002951.2 :303340-305424   | q1 | q2 | OK     | 28.1514 | 32.9173 | 0.225636    | -0.3405   | 0.733483  | 0.986963 |
| gene2560 | gene2560 | SACOL2573 | gi 57650036 ref NC_002951.2 :2635935-2636142 | q1 | q2 | OK     | 77.9962 | 61.9033 | -0.333389   | 0.47476   | 0.634961  | 0.986963 |
| gene2561 | gene2561 | SACOL2574 | gi 57650036 ref NC_002951.2 :2636231-2637230 | q1 | q2 | OK     | 93.8919 | 100.282 | 0.0949875   | -0.17033  | 0.864755  | 0.996923 |
| gene2562 | gene2562 | SACOL2575 | gi 57650036 ref NC_002951.2 :2637252-2638407 | q1 | q2 | OK     | 88.1794 | 93.9859 | 0.0920028   | -0.15869  | 0.873911  | 0.996932 |
| gene2563 | gene2563 | crtN      | gi 57650036 ref NC_002951.2 :2638833-2640342 | q1 | q2 | OK     | 57.719  | 96.7207 | 0.744779    | -1.20646  | 0.227641  | 0.858851 |
| gene2564 | gene2564 | crtM      | gi 57650036 ref NC_002951.2 :2640353-2641217 | q1 | q2 | OK     | 49.5796 | 126.945 | 1.35639     | -2.55652  | 0.0105726 | 0.23854  |
| gene2565 | gene2565 | SACOL2578 | gi 57650036 ref NC_002951.2 :2641253-2644361 | q1 | q2 | OK     | 114.783 | 234.477 | 1.03054     | -0.61656  | 0.537524  | 0.97806  |
| gene2566 | gene2566 | SACOL2579 | gi 57650036 ref NC_002951.2 :2641253-2644361 | q1 | q2 | OK     | 124.423 | 221.876 | 0.834495    | -0.58698  | 0.557216  | 0.981874 |
| gene2567 | gene2567 | SACOL2580 | gi 57650036 ref NC_002951.2 :2641253-2644361 | q1 | q2 | OK     | 154.358 | 192.114 | 0.315683    | -0.108    | 0.913999  | 0.996932 |
| gene2568 | gene2568 | SACOL2581 | gi 57650036 ref NC_002951.2 :2644535-2645303 | q1 | q2 | OK     | 57.7219 | 161.548 | 1.48477     | -2.74248  | 0.0060978 | 0.157851 |
| gene2569 | gene2569 | SACOL2582 | gi 57650036 ref NC_002951.2 :2645663-2647475 | q1 | q2 | OK     | 55.7276 | 56.4126 | 0.0176239   | -0.03007  | 0.976009  | 0.998143 |
| gene257  | gene257  | SACOL0267 | gi 57650036 ref NC_002951.2 :305491-307015   | q1 | q2 | OK     | 56.0561 | 52.355  | -0.098543   | 0.18154   | 0.855946  | 0.996923 |
| gene2570 | gene2570 | SACOL2583 | gi 57650036 ref NC_002951.2 :2647986-2648475 | q1 | q2 | NOTEST | 0       | 0       | 0           | 0         | 1         | 1        |
| gene2571 | gene2571 | isaA      | gi 57650036 ref NC_002951.2 :2648750-2649452 | q1 | q2 | OK     | 175.742 | 377.398 | 1.10263     | -1.55621  | 0.119658  | 0.725365 |
| gene2572 | gene2572 | SACOL2585 | gi 57650036 ref NC_002951.2 :2650059-2651115 | q1 | q2 | OK     | 43.9283 | 56.9387 | 0.374258    | -0.75746  | 0.448777  | 0.948742 |
| gene2573 | gene2573 | SACOL2587 | gi 57650036 ref NC_002951.2 :2651491-2652094 | q1 | q2 | OK     | 45.5691 | 33.6656 | -0.436781   | 0.88093   | 0.378358  | 0.932987 |
| gene2574 | gene2574 | SACOL2588 | gi 57650036 ref NC_002951.2 :2652291-2652792 | q1 | q2 | OK     | 20.2083 | 19.1104 | -0.080589   | 0.14272   | 0.886512  | 0.996932 |
| gene2575 | gene2575 | SACOL2589 | gi 57650036 ref NC_002951.2 :2653011-2653242 | q1 | q2 | OK     | 62.3251 | 51.1151 | -0.286063   | 0.43523   | 0.663396  | 0.986963 |
| gene2576 | gene2576 | SACOL2590 | gi 57650036 ref NC_002951.2 :2653391-2653769 | q1 | q2 | OK     | 74.1961 | 62.9539 | -0.237047   | 0.46955   | 0.638677  | 0.986963 |
| gene2577 | gene2577 | SACOL2591 | gi 57650036 ref NC_002951.2 :2653785-2654607 | q1 | q2 | OK     | 58.9674 | 69.0903 | 0.228566    | -0.46631  | 0.640997  | 0.986963 |
| gene2578 | gene2578 | SACOL2592 | gi 57650036 ref NC_002951.2 :2654626-2654926 | q1 | q2 | OK     | 16.7879 | 31.4856 | 0.907266    | -1.33332  | 0.182426  | 0.819812 |
| gene2579 | gene2579 | SACOL2593 | gi 57650036 ref NC_002951.2 :2655056-2656311 | q1 | q2 | OK     | 27.3546 | 35.5877 | 0.379594    | -0.54065  | 0.588747  | 0.985265 |
| gene258  | gene258  | SACOL0268 | gi 57650036 ref NC_002951.2 :307285-307939   | q1 | q2 | NOTEST | 0       | 0       | 0           | 0         | 1         | 1        |
| gene2580 | gene2580 | SACOL2594 | gi 57650036 ref NC_002951.2 :2655056-2656311 | q1 | q2 | OK     | 25.2428 | 24.3064 | -0.054537   | 0.08147   | 0.935068  | 0.996932 |

|          |          |           |                                              |    |    |        |         |          |           |          |           |           |
|----------|----------|-----------|----------------------------------------------|----|----|--------|---------|----------|-----------|----------|-----------|-----------|
| gene2581 | gene2581 | SACOL2595 | gi 57650036 ref NC_002951.2 :2656320-2657419 | q1 | q2 | NOTEST | 0       | 0        | 0         | 0        | 1         | 1         |
| gene2582 | gene2582 | SACOL2596 | gi 57650036 ref NC_002951.2 :2656320-2657419 | q1 | q2 | OK     | 62.7551 | 56.8387  | -0.142858 | 0.28511  | 0.775559  | 0.986963  |
| gene2583 | gene2583 | SACOL2597 | gi 57650036 ref NC_002951.2 :2657438-2658269 | q1 | q2 | OK     | 83.4928 | 75.6787  | -0.141763 | 0.28108  | 0.778653  | 0.986963  |
| gene2584 | gene2584 | SACOL2598 | gi 57650036 ref NC_002951.2 :2658415-2659306 | q1 | q2 | OK     | 52.2091 | 54.7052  | 0.0673773 | -0.13837 | 0.889947  | 0.996932  |
| gene2585 | gene2585 | SACOL2599 | gi 57650036 ref NC_002951.2 :2659403-2660723 | q1 | q2 | OK     | 24.0067 | 31.2799  | 0.381794  | -0.78947 | 0.429839  | 0.940178  |
| gene2586 | gene2586 | SACOL2600 | gi 57650036 ref NC_002951.2 :2660737-2661844 | q1 | q2 | OK     | 33.5272 | 38.0586  | 0.182889  | -0.37811 | 0.705352  | 0.986963  |
| gene2587 | gene2587 | SACOL2601 | gi 57650036 ref NC_002951.2 :2662177-2662830 | q1 | q2 | OK     | 20.798  | 26.5338  | 0.351384  | -0.32449 | 0.745567  | 0.986963  |
| gene2588 | gene2588 | SACOL2602 | gi 57650036 ref NC_002951.2 :2662177-2662830 | q1 | q2 | OK     | 52.6565 | 50.38    | -0.063762 | 0.11039  | 0.912102  | 0.996932  |
| gene2589 | gene2589 | SACOL2603 | gi 57650036 ref NC_002951.2 :2662844-2663123 | q1 | q2 | OK     | 29.4507 | 17.7433  | -0.731027 | 1.01513  | 0.310044  | 0.892668  |
| gene259  | gene259  | SACOL0269 | gi 57650036 ref NC_002951.2 :307972-308560   | q1 | q2 | OK     | 2.20825 | 0.978824 | -1.17378  | 1.01024  | 0.312379  | 0.892668  |
| gene2590 | gene2590 | SACOL2605 | gi 57650036 ref NC_002951.2 :2663464-2664274 | q1 | q2 | OK     | 123.391 | 164.435  | 0.414284  | -0.70704 | 0.479541  | 0.960423  |
| gene2591 | gene2591 | pyrD      | gi 57650036 ref NC_002951.2 :2664548-2665613 | q1 | q2 | OK     | 45.5516 | 45.2662  | -0.009069 | 0.01855  | 0.985202  | 0.998143  |
| gene2592 | gene2592 | SACOL2607 | gi 57650036 ref NC_002951.2 :2665767-2666043 | q1 | q2 | OK     | 47.5704 | 28.1501  | -0.756927 | 1.18022  | 0.237913  | 0.863102  |
| gene2593 | gene2593 | SACOL2608 | gi 57650036 ref NC_002951.2 :2666228-2666951 | q1 | q2 | OK     | 51.1407 | 56.5389  | 0.144773  | -0.30011 | 0.764096  | 0.986963  |
| gene2594 | gene2594 | SACOL2609 | gi 57650036 ref NC_002951.2 :2667304-2667754 | q1 | q2 | OK     | 729.138 | 720.773  | -0.016647 | 0.02046  | 0.983673  | 0.998143  |
| gene2595 | gene2595 | SACOL2610 | gi 57650036 ref NC_002951.2 :2667834-2668422 | q1 | q2 | OK     | 58.5186 | 45.0259  | -0.378141 | 0.77591  | 0.4378    | 0.943654  |
| gene2596 | gene2596 | SACOL2612 | gi 57650036 ref NC_002951.2 :2668554-2670237 | q1 | q2 | OK     | 61.393  | 56.0622  | -0.131045 | 0.22658  | 0.820753  | 0.992727  |
| gene2597 | gene2597 | panD      | gi 57650036 ref NC_002951.2 :2670365-2670749 | q1 | q2 | OK     | 142.632 | 72.245   | -0.98133  | 1.99391  | 0.0461614 | 0.487023  |
| gene2598 | gene2598 | panC      | gi 57650036 ref NC_002951.2 :2670750-2672413 | q1 | q2 | OK     | 221.273 | 151.153  | -0.549817 | 0.48488  | 0.62776   | 0.986963  |
| gene2599 | gene2599 | panB      | gi 57650036 ref NC_002951.2 :2670750-2672413 | q1 | q2 | OK     | 228.242 | 86.4583  | -1.40049  | 1.08866  | 0.276302  | 0.879877  |
| gene26   | gene26   | SACOL0025 | gi 57650036 ref NC_002951.2 :33575-34055     | q1 | q2 | OK     | 206.44  | 145      | -0.509671 | 1.002    | 0.316341  | 0.892668  |
| gene260  | gene260  | SACOL0270 | gi 57650036 ref NC_002951.2 :308702-309596   | q1 | q2 | OK     | 97.6064 | 89.0556  | -0.132271 | 0.24926  | 0.803161  | 0.989625  |
| gene2600 | gene2600 | SACOL2616 | gi 57650036 ref NC_002951.2 :2672485-2673346 | q1 | q2 | OK     | 52.4681 | 58.8793  | 0.166318  | -0.34155 | 0.73269   | 0.986963  |
| gene2601 | gene2601 | budA2     | gi 57650036 ref NC_002951.2 :2673431-2674136 | q1 | q2 | OK     | 122.115 | 67.8554  | -0.847704 | 1.67367  | 0.0941945 | 0.662528  |
| gene2602 | gene2602 | ldh2      | gi 57650036 ref NC_002951.2 :2674413-2675373 | q1 | q2 | OK     | 50.5769 | 43.5544  | -0.215662 | 0.44356  | 0.657358  | 0.986963  |
| gene2603 | gene2603 | SACOL2619 | gi 57650036 ref NC_002951.2 :2676059-2677508 | q1 | q2 | OK     | 133.405 | 151.746  | 0.185849  | -0.23672 | 0.812872  | 0.991128  |
| gene2604 | gene2604 | SACOL2620 | gi 57650036 ref NC_002951.2 :2677588-2678926 | q1 | q2 | OK     | 86.3394 | 89.8592  | 0.0576476 | -0.09409 | 0.925036  | 0.996932  |
| gene2605 | gene2605 | SACOL2621 | gi 57650036 ref NC_002951.2 :2679183-2679600 | q1 | q2 | OK     | 31.7253 | 94.8103  | 1.57941   | -3.06238 | 0.0021959 | 0.0950656 |
| gene2606 | gene2606 | fdaB      | gi 57650036 ref NC_002951.2 :2679722-2680613 | q1 | q2 | OK     | 214.602 | 493.654  | 1.20184   | -1.39213 | 0.163882  | 0.811825  |
| gene2607 | gene2607 | mgo2      | gi 57650036 ref NC_002951.2 :2680805-2682302 | q1 | q2 | OK     | 597.293 | 231.23   | -1.36911  | 1.34094  | 0.179941  | 0.819812  |
| gene2608 | gene2608 | SACOL2624 | gi 57650036 ref NC_002951.2 :2682986-2684585 | q1 | q2 | OK     | 172.929 | 244.178  | 0.497756  | -0.53699 | 0.591275  | 0.985265  |
| gene2609 | gene2609 | SACOL2625 | gi 57650036 ref NC_002951.2 :2684778-2685222 | q1 | q2 | OK     | 135.045 | 169.528  | 0.328085  | -0.67002 | 0.502844  | 0.965124  |
| gene261  | gene261  | SACOL0271 | gi 57650036 ref NC_002951.2 :309843-310137   | q1 | q2 | OK     | 961.121 | 743.75   | -0.3699   | 0.60395  | 0.545878  | 0.979019  |

|          |          |           |                                              |    |    |        |         |         |              |              |           |          |
|----------|----------|-----------|----------------------------------------------|----|----|--------|---------|---------|--------------|--------------|-----------|----------|
| gene2610 | gene2610 | SACOL2626 | gi 57650036 ref NC_002951.2 :2685502-2685715 | q1 | q2 | OK     | 44.5737 | 28.8349 | -0.628375    | 0.75585      | 0.449737  | 0.948742 |
| gene2611 | gene2611 | betA      | gi 57650036 ref NC_002951.2 :2685992-2687702 | q1 | q2 | OK     | 47.4135 | 54.5516 | 0.202325     | -0.36505     | 0.715075  | 0.986963 |
| gene2612 | gene2612 | betB      | gi 57650036 ref NC_002951.2 :2687962-2689453 | q1 | q2 | OK     | 29.1213 | 35.3794 | 0.280832     | -0.57138     | 0.567744  | 0.985265 |
| gene2613 | gene2613 | SACOL2629 | gi 57650036 ref NC_002951.2 :2689521-2689617 | q1 | q2 | NOTEST | 0       | 0       | 0            | 0            | 1         | 1        |
| gene2614 | gene2614 | SACOL2630 | gi 57650036 ref NC_002951.2 :2689705-2690269 | q1 | q2 | OK     | 60.6123 | 41.9639 | -0.530463    | 1.08179      | 0.279346  | 0.879877 |
| gene2615 | gene2615 | SACOL2631 | gi 57650036 ref NC_002951.2 :2690456-2691143 | q1 | q2 | NOTEST | 0       | 0       | 0            | 0            | 1         | 1        |
| gene2616 | gene2616 | cudT      | gi 57650036 ref NC_002951.2 :2691406-2693029 | q1 | q2 | OK     | 52.0002 | 57.8467 | 0.153718     | -0.27603     | 0.782528  | 0.986963 |
| gene2617 | gene2617 | nrdG      | gi 57650036 ref NC_002951.2 :2693547-2695931 | q1 | q2 | OK     | 74.1774 | 167.583 | 1.17582      | -0.98391     | 0.325162  | 0.900129 |
| gene2618 | gene2618 | nrdD      | gi 57650036 ref NC_002951.2 :2693547-2695931 | q1 | q2 | OK     | 32.235  | 74.119  | 1.20121      | -1.43919     | 0.150096  | 0.788621 |
| gene2619 | gene2619 | SACOL2636 | gi 57650036 ref NC_002951.2 :2696177-2697548 | q1 | q2 | OK     | 32.414  | 45.9634 | 0.50387      | -1.01194     | 0.311567  | 0.892668 |
| gene262  | gene262  | SACOL0272 | gi 57650036 ref NC_002951.2 :310220-313922   | q1 | q2 | OK     | 31.4757 | 39.1553 | 0.314972     | -0.44977     | 0.652875  | 0.986963 |
| gene2620 | gene2620 | SACOL2637 | gi 57650036 ref NC_002951.2 :2697869-2697965 | q1 | q2 | NOTEST | 0       | 0       | 0            | 0            | 1         | 1        |
| gene2621 | gene2621 | SACOL2638 | gi 57650036 ref NC_002951.2 :2698040-2698646 | q1 | q2 | OK     | 126.241 | 136.52  | 0.112932     | -0.22094     | 0.825139  | 0.992769 |
| gene2622 | gene2622 | cysJ      | gi 57650036 ref NC_002951.2 :2698708-2700589 | q1 | q2 | OK     | 42.1368 | 39.5587 | -0.091085    | 0.17002      | 0.864995  | 0.996923 |
| gene2623 | gene2623 | SACOL2640 | gi 57650036 ref NC_002951.2 :2700783-2700876 | q1 | q2 | NOTEST | 0       | 0       | 0            | 0            | 1         | 1        |
| gene2624 | gene2624 | gpxA2     | gi 57650036 ref NC_002951.2 :2700983-2701481 | q1 | q2 | OK     | 46.4109 | 51.1663 | 0.140729     | -0.28269     | 0.777415  | 0.986963 |
| gene2625 | gene2625 | SACOL2642 | gi 57650036 ref NC_002951.2 :2702175-2702289 | q1 | q2 | NOTEST | 0       | 0       | 0            | 0            | 1         | 1        |
| gene2626 | gene2626 | SACOL2643 | gi 57650036 ref NC_002951.2 :2702904-2705666 | q1 | q2 | OK     | 48.4632 | 49.1671 | 0.0208032    | -0.02674     | 0.978664  | 0.998143 |
| gene2627 | gene2627 | SACOL2644 | gi 57650036 ref NC_002951.2 :2702904-2705666 | q1 | q2 | OK     | 53.55   | 60.4099 | 0.173897     | -0.1371      | 0.89095   | 0.996932 |
| gene2628 | gene2628 | nsaS      | gi 57650036 ref NC_002951.2 :2705764-2706652 | q1 | q2 | OK     | 44.7077 | 36.1877 | -0.305021    | 0.63158      | 0.527663  | 0.97289  |
| gene2629 | gene2629 | SACOL2646 | gi 57650036 ref NC_002951.2 :2706662-2707328 | q1 | q2 | OK     | 69.574  | 80.4447 | 0.209448     | -0.43107     | 0.666415  | 0.986963 |
| gene263  | gene263  | SACOL0273 | gi 57650036 ref NC_002951.2 :310220-313922   | q1 | q2 | OK     | 59.0404 | 46.4227 | -0.346871    | 0.18683      | 0.851797  | 0.996923 |
| gene2630 | gene2630 | SACOL2647 | gi 57650036 ref NC_002951.2 :2707353-2707554 | q1 | q2 | OK     | 123.543 | 81.3952 | -0.601999    | 0.90509      | 0.36542   | 0.927776 |
| gene2631 | gene2631 | SACOL2648 | gi 57650036 ref NC_002951.2 :2707751-2709176 | q1 | q2 | OK     | 22.6437 | 32.8943 | 0.538725     | -1.10878     | 0.267526  | 0.875983 |
| gene2632 | gene2632 | SACOL2649 | gi 57650036 ref NC_002951.2 :2709235-2709337 | q1 | q2 | OK     | 1250.9  | 0       | -1.79769e+07 | -1.79769e+07 | 0.201324  | 0.819847 |
| gene2633 | gene2633 | SACOL2650 | gi 57650036 ref NC_002951.2 :2709458-2709914 | q1 | q2 | OK     | 65.7045 | 30.9656 | -1.08533     | 2.10875      | 0.0349662 | 0.436145 |
| gene2634 | gene2634 | SACOL2651 | gi 57650036 ref NC_002951.2 :2710158-2710920 | q1 | q2 | OK     | 63.3762 | 50.45   | -0.329086    | 0.67944      | 0.496858  | 0.964002 |
| gene2635 | gene2635 | clfB      | gi 57650036 ref NC_002951.2 :2711035-2713777 | q1 | q2 | OK     | 200.335 | 114.872 | -0.802388    | 0.80926      | 0.418366  | 0.939652 |
| gene2636 | gene2636 | SACOL2653 | gi 57650036 ref NC_002951.2 :2714126-2714813 | q1 | q2 | OK     | 42.1945 | 32.2541 | -0.387574    | 0.78953      | 0.429803  | 0.940178 |
| gene2637 | gene2637 | arcC2     | gi 57650036 ref NC_002951.2 :2714929-2715871 | q1 | q2 | OK     | 76.2863 | 59.0427 | -0.369665    | 0.73233      | 0.463965  | 0.952374 |
| gene2638 | gene2638 | arcD      | gi 57650036 ref NC_002951.2 :2715887-2717318 | q1 | q2 | OK     | 68.2495 | 77.0201 | 0.174417     | -0.29825     | 0.765513  | 0.986963 |
| gene2639 | gene2639 | arcB2     | gi 57650036 ref NC_002951.2 :2717408-2718419 | q1 | q2 | OK     | 56.0264 | 51.7296 | -0.115117    | 0.2329       | 0.81584   | 0.991377 |
| gene264  | gene264  | SACOL0274 | gi 57650036 ref NC_002951.2 :310220-313922   | q1 | q2 | OK     | 18.6205 | 19.033  | 0.0316119    | -0.00505     | 0.995968  | 0.998434 |

|          |          |           |                                              |    |    |        |         |         |           |          |           |          |
|----------|----------|-----------|----------------------------------------------|----|----|--------|---------|---------|-----------|----------|-----------|----------|
| gene2640 | gene2640 | arcA      | gi 57650036 ref NC_002951.2 :2718451-2719687 | q1 | q2 | OK     | 43.4508 | 40.1776 | -0.112991 | 0.22899  | 0.81888   | 0.992379 |
| gene2641 | gene2641 | SACOL2658 | gi 57650036 ref NC_002951.2 :2720033-2720483 | q1 | q2 | OK     | 15.645  | 18.3038 | 0.226442  | -0.37622 | 0.706753  | 0.986963 |
| gene2642 | gene2642 | aur       | gi 57650036 ref NC_002951.2 :2720849-2722379 | q1 | q2 | OK     | 9.34396 | 10.6011 | 0.182103  | -0.35999 | 0.718857  | 0.986963 |
| gene2643 | gene2643 | isaB      | gi 57650036 ref NC_002951.2 :2722802-2723330 | q1 | q2 | NOTEST | 0       | 0       | 0         | 0        | 1         | 1        |
| gene2644 | gene2644 | SACOL2661 | gi 57650036 ref NC_002951.2 :2723587-2724046 | q1 | q2 | NOTEST | 0       | 0       | 0         | 0        | 1         | 1        |
| gene2645 | gene2645 | SACOL2662 | gi 57650036 ref NC_002951.2 :2724285-2726160 | q1 | q2 | OK     | 29.2064 | 24.3039 | -0.265101 | 0.53532  | 0.592429  | 0.985916 |
| gene2646 | gene2646 | SACOL2663 | gi 57650036 ref NC_002951.2 :2726236-2728189 | q1 | q2 | OK     | 43.676  | 46.9143 | 0.103189  | -0.18456 | 0.853571  | 0.996923 |
| gene2647 | gene2647 | manA2     | gi 57650036 ref NC_002951.2 :2728202-2729141 | q1 | q2 | OK     | 46.4007 | 54.206  | 0.224307  | -0.46032 | 0.645284  | 0.986963 |
| gene2648 | gene2648 | SACOL2665 | gi 57650036 ref NC_002951.2 :2729252-2732234 | q1 | q2 | OK     | 83.8333 | 51.3543 | -0.707038 | 0.89209  | 0.372346  | 0.929385 |
| gene2649 | gene2649 | SACOL2666 | gi 57650036 ref NC_002951.2 :2732444-2734304 | q1 | q2 | OK     | 99.8137 | 108.966 | 0.126563  | -0.16322 | 0.870344  | 0.996923 |
| gene265  | gene265  | SACOL0275 | gi 57650036 ref NC_002951.2 :313934-315269   | q1 | q2 | OK     | 32.2251 | 48.4322 | 0.587783  | -1.17949 | 0.238204  | 0.863102 |
| gene2650 | gene2650 | SACOL2667 | gi 57650036 ref NC_002951.2 :2734570-2735131 | q1 | q2 | OK     | 327.807 | 333.13  | 0.0232387 | -0.03448 | 0.972495  | 0.99793  |
| gene2651 | gene2651 | SACOL2668 | gi 57650036 ref NC_002951.2 :2735298-2737206 | q1 | q2 | OK     | 139.006 | 73.8933 | -0.911632 | 1.16843  | 0.242633  | 0.867572 |
| gene2652 | gene2652 | SACOL2669 | gi 57650036 ref NC_002951.2 :2737447-2740307 | q1 | q2 | OK     | 103.372 | 130.977 | 0.341473  | -0.25133 | 0.801559  | 0.989625 |
| gene2653 | gene2653 | SACOL2670 | gi 57650036 ref NC_002951.2 :2737447-2740307 | q1 | q2 | OK     | 95.6807 | 142.489 | 0.574547  | -0.45139 | 0.651708  | 0.986963 |
| gene2654 | gene2654 | SACOL2671 | gi 57650036 ref NC_002951.2 :2740324-2746753 | q1 | q2 | OK     | 84.1784 | 137.083 | 0.703525  | -0.54484 | 0.585864  | 0.985265 |
| gene2655 | gene2655 | SACOL2672 | gi 57650036 ref NC_002951.2 :2740324-2746753 | q1 | q2 | OK     | 40.4908 | 41.5128 | 0.0359616 | -0.01009 | 0.991949  | 0.998143 |
| gene2656 | gene2656 | SACOL2673 | gi 57650036 ref NC_002951.2 :2740324-2746753 | q1 | q2 | OK     | 45.5007 | 57.6196 | 0.340671  | -0.14383 | 0.885638  | 0.996932 |
| gene2657 | gene2657 | SACOL2674 | gi 57650036 ref NC_002951.2 :2740324-2746753 | q1 | q2 | OK     | 37.3958 | 41.9514 | 0.165843  | -0.06095 | 0.951398  | 0.996932 |
| gene2658 | gene2658 | secY      | gi 57650036 ref NC_002951.2 :2746763-2747975 | q1 | q2 | OK     | 28.4885 | 33.9194 | 0.251732  | -0.52074 | 0.602545  | 0.986963 |
| gene2659 | gene2659 | SACOL2676 | gi 57650036 ref NC_002951.2 :2748104-2754890 | q1 | q2 | OK     | 57.561  | 25.1152 | -1.19653  | 1.35392  | 0.175762  | 0.819812 |
| gene266  | gene266  | yukA      | gi 57650036 ref NC_002951.2 :315290-319730   | q1 | q2 | OK     | 29.9884 | 34.7301 | 0.211783  | -0.30309 | 0.761825  | 0.986963 |
| gene2660 | gene2660 | SACOL2677 | gi 57650036 ref NC_002951.2 :2755243-2755354 | q1 | q2 | NOTEST | 0       | 0       | 0         | 0        | 1         | 1        |
| gene2661 | gene2661 | SACOL2678 | gi 57650036 ref NC_002951.2 :2755434-2756127 | q1 | q2 | OK     | 6.17943 | 5.1829  | -0.253712 | 0.37769  | 0.705658  | 0.986963 |
| gene2662 | gene2662 | SACOL2680 | gi 57650036 ref NC_002951.2 :2756807-2757110 | q1 | q2 | OK     | 44.0542 | 30.7085 | -0.520641 | 0.86235  | 0.388496  | 0.939607 |
| gene2663 | gene2663 | SACOL2681 | gi 57650036 ref NC_002951.2 :2757263-2757623 | q1 | q2 | OK     | 121.187 | 328.03  | 1.43659   | -2.8764  | 0.0040224 | 0.12949  |
| gene2664 | gene2664 | SACOL2682 | gi 57650036 ref NC_002951.2 :2757707-2758319 | q1 | q2 | OK     | 56.1298 | 71.4643 | 0.348457  | -0.72163 | 0.470524  | 0.957444 |
| gene2665 | gene2665 | SACOL2683 | gi 57650036 ref NC_002951.2 :2758397-2758874 | q1 | q2 | OK     | 51.4558 | 65.1511 | 0.340456  | -0.68998 | 0.490208  | 0.964002 |
| gene2666 | gene2666 | SACOL2684 | gi 57650036 ref NC_002951.2 :2758876-2759377 | q1 | q2 | OK     | 34.145  | 49.4377 | 0.533938  | -1.05296 | 0.292358  | 0.891156 |
| gene2667 | gene2667 | cap1C     | gi 57650036 ref NC_002951.2 :2759611-2761068 | q1 | q2 | OK     | 35.5211 | 39.5396 | 0.154621  | -0.17595 | 0.86033   | 0.996923 |
| gene2668 | gene2668 | cap1B     | gi 57650036 ref NC_002951.2 :2759611-2761068 | q1 | q2 | OK     | 68.1944 | 88.8868 | 0.382316  | -0.5872  | 0.557073  | 0.981874 |
| gene2669 | gene2669 | cap1A     | gi 57650036 ref NC_002951.2 :2761084-2761747 | q1 | q2 | OK     | 17.0895 | 21.4758 | 0.329598  | -0.62114 | 0.534509  | 0.9754   |
| gene267  | gene267  | SACOL0277 | gi 57650036 ref NC_002951.2 :319759-320152   | q1 | q2 | NOTEST | 0       | 0       | 0         | 0        | 1         | 1        |

|          |          |           |                                              |    |    |        |         |          |            |            |           |          |
|----------|----------|-----------|----------------------------------------------|----|----|--------|---------|----------|------------|------------|-----------|----------|
| gene2670 | gene2670 | icaR      | gi 57650036 ref NC_002951.2 :2762595-2763156 | q1 | q2 | OK     | 151.954 | 84.2437  | -0.85099   | 1.70217    | 0.0887233 | 0.647629 |
| gene2671 | gene2671 | icaA      | gi 57650036 ref NC_002951.2 :2763319-2766734 | q1 | q2 | OK     | 38.2505 | 57.9669  | 0.599751   | -0.76488   | 0.444341  | 0.948742 |
| gene2672 | gene2672 | icaD      | gi 57650036 ref NC_002951.2 :2763319-2766734 | q1 | q2 | OK     | 27.0369 | 25.6869  | -0.073892  | 0.02387    | 0.980956  | 0.998143 |
| gene2673 | gene2673 | icaB      | gi 57650036 ref NC_002951.2 :2763319-2766734 | q1 | q2 | OK     | 21.3344 | 31.3376  | 0.55471    | -0.42589   | 0.670189  | 0.986963 |
| gene2674 | gene2674 | icaC      | gi 57650036 ref NC_002951.2 :2763319-2766734 | q1 | q2 | OK     | 17.939  | 23.2758  | 0.37573    | -0.28501   | 0.775638  | 0.986963 |
| gene2675 | gene2675 | SACOL2693 | gi 57650036 ref NC_002951.2 :2767031-2767097 | q1 | q2 | NOTEST | 0       | 0        | 0          | 0          | 1         | 1        |
| gene2676 | gene2676 | geh       | gi 57650036 ref NC_002951.2 :2767124-2769167 | q1 | q2 | OK     | 424.356 | 336.115  | -0.336321  | 0.30943    | 0.756994  | 0.986963 |
| gene2677 | gene2677 | SACOL2695 | gi 57650036 ref NC_002951.2 :2769887-2770100 | q1 | q2 | OK     | 7.42896 | 14.4175  | 0.956587   | -0.73225   | 0.464015  | 0.952374 |
| gene2678 | gene2678 | hisI      | gi 57650036 ref NC_002951.2 :2770259-2774476 | q1 | q2 | OK     | 37.8855 | 44.9318  | 0.24609    | -0.11778   | 0.906239  | 0.996932 |
| gene2679 | gene2679 | hisF      | gi 57650036 ref NC_002951.2 :2770259-2774476 | q1 | q2 | OK     | 57.8187 | 69.2996  | 0.26131    | -0.17499   | 0.861089  | 0.996923 |
| gene268  | gene268  | SACOL0278 | gi 57650036 ref NC_002951.2 :320167-321473   | q1 | q2 | NOTEST | 0       | 0        | 0          | 0          | 1         | 1        |
| gene2680 | gene2680 | hisA      | gi 57650036 ref NC_002951.2 :2770259-2774476 | q1 | q2 | OK     | 80.0435 | 87.6043  | 0.130218   | -0.09546   | 0.92395   | 0.996932 |
| gene2681 | gene2681 | hisH      | gi 57650036 ref NC_002951.2 :2770259-2774476 | q1 | q2 | OK     | 34.1334 | 42.3778  | 0.312125   | -0.13471   | 0.892844  | 0.996932 |
| gene2682 | gene2682 | hisB      | gi 57650036 ref NC_002951.2 :2770259-2774476 | q1 | q2 | OK     | 35.5439 | 36.3715  | 0.0332084  | -0.0139    | 0.988908  | 0.998143 |
| gene2683 | gene2683 | SACOL2701 | gi 57650036 ref NC_002951.2 :2770259-2774476 | q1 | q2 | OK     | 27.2296 | 28.794   | 0.0805971  | -0.04298   | 0.965714  | 0.996932 |
| gene2684 | gene2684 | hisD      | gi 57650036 ref NC_002951.2 :2774491-2776349 | q1 | q2 | OK     | 21.4654 | 24.7433  | 0.205025   | -0.35978   | 0.719015  | 0.986963 |
| gene2685 | gene2685 | hisG      | gi 57650036 ref NC_002951.2 :2774491-2776349 | q1 | q2 | OK     | 18.1518 | 25.6955  | 0.5014     | -0.54237   | 0.587566  | 0.985265 |
| gene2686 | gene2686 | hisZ      | gi 57650036 ref NC_002951.2 :2776366-2777185 | q1 | q2 | OK     | 32.9109 | 43.8527  | 0.414097   | -0.85515   | 0.392469  | 0.939607 |
| gene2687 | gene2687 | SACOL2705 | gi 57650036 ref NC_002951.2 :2777489-2778614 | q1 | q2 | OK     | 68.3314 | 75.9263  | 0.152052   | -0.2851    | 0.775567  | 0.986963 |
| gene2688 | gene2688 | SACOL2706 | gi 57650036 ref NC_002951.2 :2778731-2779229 | q1 | q2 | OK     | 27.7762 | 27.2607  | -0.027028  | 0.05057    | 0.959665  | 0.996932 |
| gene2689 | gene2689 | SACOL2707 | gi 57650036 ref NC_002951.2 :2779275-2781818 | q1 | q2 | OK     | 27.9951 | 32.0813  | 0.196557   | -0.18036   | 0.856873  | 0.996923 |
| gene269  | gene269  | SACOL0279 | gi 57650036 ref NC_002951.2 :320167-321473   | q1 | q2 | NOTEST | 0       | 0        | 0          | 0          | 1         | 1        |
| gene2690 | gene2690 | SACOL2708 | gi 57650036 ref NC_002951.2 :2779275-2781818 | q1 | q2 | OK     | 30.4743 | 43.6422  | 0.518128   | -0.80699   | 0.419673  | 0.939652 |
| gene2691 | gene2691 | SACOL2709 | gi 57650036 ref NC_002951.2 :2781870-2782425 | q1 | q2 | OK     | 33.8599 | 49.3717  | 0.544107   | -1.08964   | 0.275871  | 0.879877 |
| gene2692 | gene2692 | SACOL2710 | gi 57650036 ref NC_002951.2 :2782453-2783302 | q1 | q2 | OK     | 68.8685 | 78.5963  | 0.190616   | -0.38085   | 0.703317  | 0.986963 |
| gene2693 | gene2693 | SACOL2711 | gi 57650036 ref NC_002951.2 :2783681-2784197 | q1 | q2 | OK     | 228.009 | 373.34   | 0.711401   | -1.15847   | 0.246672  | 0.869586 |
| gene2694 | gene2694 | drp35     | gi 57650036 ref NC_002951.2 :2784345-2785317 | q1 | q2 | OK     | 37.8696 | 44.4002  | 0.229524   | -0.4747    | 0.635     | 0.986963 |
| gene2695 | gene2695 | SACOL2713 | gi 57650036 ref NC_002951.2 :2785560-2786517 | q1 | q2 | OK     | 65.1493 | 51.9212  | -0.327427  | 0.66029    | 0.509066  | 0.971029 |
| gene2696 | gene2696 | pcp       | gi 57650036 ref NC_002951.2 :2786668-2787307 | q1 | q2 | OK     | 36.9095 | 30.7199  | -0.264818  | 0.53125    | 0.595246  | 0.985953 |
| gene2697 | gene2697 | SACOL2715 | gi 57650036 ref NC_002951.2 :2787425-2788521 | q1 | q2 | NOTEST | 0       | 0        | 0          | 0          | 1         | 1        |
| gene2698 | gene2698 | SACOL2716 | gi 57650036 ref NC_002951.2 :2787425-2788521 | q1 | q2 | NOTEST | 0       | 0        | 0          | 0          | 1         | 1        |
| gene2699 | gene2699 | SACOL2717 | gi 57650036 ref NC_002951.2 :2788687-2789152 | q1 | q2 | OK     | 61.7509 | 56.2098  | -0.13564   | 0.27443    | 0.783753  | 0.986963 |
| gene27   | gene27   | SACOL0026 | gi 57650036 ref NC_002951.2 :34371-35667     | q1 | q2 | NOTEST | 0       | 0.118789 | 1.79769e+3 | 1.79769e+0 | 0.18455   | 1        |

|          |          |           |                                              |    |    |        |         |          |           |          |           |          |
|----------|----------|-----------|----------------------------------------------|----|----|--------|---------|----------|-----------|----------|-----------|----------|
| gene270  | gene270  | SACOL0280 | gi 57650036 ref NC_002951.2 :320167-321473   | q1 | q2 | NOTEST | 0       | 0        | 0         | 0        | 1         | 1        |
| gene2700 | gene2700 | SACOL2718 | gi 57650036 ref NC_002951.2 :2789389-2790808 | q1 | q2 | OK     | 58.6385 | 45.5695  | -0.363778 | 0.68996  | 0.490221  | 0.964002 |
| gene2701 | gene2701 | rarD      | gi 57650036 ref NC_002951.2 :2791220-2792129 | q1 | q2 | OK     | 74.0643 | 89.2193  | 0.268579  | -0.51919 | 0.603627  | 0.986963 |
| gene2702 | gene2702 | SACOL2720 | gi 57650036 ref NC_002951.2 :2792353-2792929 | q1 | q2 | OK     | 18.4714 | 23.536   | 0.349579  | -0.64758 | 0.51726   | 0.971416 |
| gene2703 | gene2703 | nixA      | gi 57650036 ref NC_002951.2 :2793057-2794110 | q1 | q2 | OK     | 31.7828 | 42.3953  | 0.415658  | -0.85867 | 0.39052   | 0.939607 |
| gene2704 | gene2704 | SACOL2722 | gi 57650036 ref NC_002951.2 :2794352-2795147 | q1 | q2 | OK     | 1.66248 | 0.215978 | -2.94438  | 1.69852  | 0.0894104 | 0.650752 |
| gene2705 | gene2705 | SACOL2723 | gi 57650036 ref NC_002951.2 :2795280-2795793 | q1 | q2 | OK     | 61.871  | 83.2732  | 0.428588  | -0.88491 | 0.376207  | 0.932533 |
| gene2706 | gene2706 | SACOL2724 | gi 57650036 ref NC_002951.2 :2796075-2798704 | q1 | q2 | OK     | 30.3793 | 36.9445  | 0.282269  | -0.31723 | 0.751067  | 0.986963 |
| gene2707 | gene2707 | SACOL2725 | gi 57650036 ref NC_002951.2 :2796075-2798704 | q1 | q2 | OK     | 20.7307 | 24.9189  | 0.265466  | -0.42026 | 0.674297  | 0.986963 |
| gene2708 | gene2708 | SACOL2726 | gi 57650036 ref NC_002951.2 :2798796-2798988 | q1 | q2 | NOTEST | 0       | 0        | 0         | 0        | 1         | 1        |
| gene2709 | gene2709 | SACOL2727 | gi 57650036 ref NC_002951.2 :2798999-2799536 | q1 | q2 | OK     | 8.80071 | 5.97176  | -0.559463 | 0.80545  | 0.420558  | 0.939652 |
| gene271  | gene271  | SACOL0281 | gi 57650036 ref NC_002951.2 :321482-323327   | q1 | q2 | NOTEST | 0       | 0        | 0         | 0        | 1         | 1        |
| gene2710 | gene2710 | SACOL2728 | gi 57650036 ref NC_002951.2 :2799595-2800093 | q1 | q2 | OK     | 22.8539 | 14.6788  | -0.638699 | 1.10905  | 0.267408  | 0.875983 |
| gene2711 | gene2711 | SACOL2729 | gi 57650036 ref NC_002951.2 :2800171-2800522 | q1 | q2 | OK     | 20.9856 | 17.2761  | -0.280623 | 0.4314   | 0.666177  | 0.986963 |
| gene2712 | gene2712 | SACOL2730 | gi 57650036 ref NC_002951.2 :2800550-2800742 | q1 | q2 | NOTEST | 0       | 0        | 0         | 0        | 1         | 1        |
| gene2713 | gene2713 | SACOL2731 | gi 57650036 ref NC_002951.2 :2801134-2801335 | q1 | q2 | OK     | 959.835 | 517.099  | -0.892346 | 1.80775  | 0.0706454 | 0.590463 |
| gene2714 | gene2714 | SACOL2732 | gi 57650036 ref NC_002951.2 :2801461-2802031 | q1 | q2 | OK     | 26.8239 | 36.8752  | 0.45913   | -0.89796 | 0.369209  | 0.928011 |
| gene2715 | gene2715 | SACOL2733 | gi 57650036 ref NC_002951.2 :2802290-2802671 | q1 | q2 | OK     | 186.684 | 261.345  | 0.485359  | -0.97862 | 0.327768  | 0.900464 |
| gene2716 | gene2716 | SACOL2734 | gi 57650036 ref NC_002951.2 :2802753-2803107 | q1 | q2 | OK     | 58.8069 | 69.4407  | 0.239796  | -0.46457 | 0.642241  | 0.986963 |
| gene2717 | gene2717 | SACOL2735 | gi 57650036 ref NC_002951.2 :2803560-2804400 | q1 | q2 | OK     | 206.104 | 92.3476  | -1.15822  | 1.88104  | 0.0599668 | 0.549064 |
| gene2718 | gene2718 | gidB      | gi 57650036 ref NC_002951.2 :2804442-2807039 | q1 | q2 | OK     | 176.085 | 104.356  | -0.75475  | 0.45209  | 0.651204  | 0.986963 |
| gene2719 | gene2719 | gidA      | gi 57650036 ref NC_002951.2 :2804442-2807039 | q1 | q2 | OK     | 128.526 | 92.1289  | -0.480338 | 0.45346  | 0.65022   | 0.986963 |
| gene272  | gene272  | SACOL0282 | gi 57650036 ref NC_002951.2 :323337-323829   | q1 | q2 | OK     | 2.50694 | 4.2753   | 0.7701    | -0.82965 | 0.406736  | 0.939607 |
| gene2720 | gene2720 | trmE      | gi 57650036 ref NC_002951.2 :2807105-2808485 | q1 | q2 | OK     | 85.922  | 71.4644  | -0.265804 | 0.44721  | 0.654724  | 0.986963 |
| gene2721 | gene2721 | rnpA      | gi 57650036 ref NC_002951.2 :2808623-2808971 | q1 | q2 | OK     | 33.6229 | 39.1747  | 0.220479  | -0.38882 | 0.697408  | 0.986963 |
| gene2722 | gene2722 | rpmH      | gi 57650036 ref NC_002951.2 :2809097-2809235 | q1 | q2 | OK     | 1574.83 | 385.782  | -2.02934  | 2.76706  | 0.0056564 | 0.151098 |
| gene273  | gene273  | SACOL0283 | gi 57650036 ref NC_002951.2 :324036-324720   | q1 | q2 | NOTEST | 0       | 0        | 0         | 0        | 1         | 1        |
| gene274  | gene274  | SACOL0284 | gi 57650036 ref NC_002951.2 :324866-325478   | q1 | q2 | NOTEST | 0       | 0        | 0         | 0        | 1         | 1        |
| gene275  | gene275  | SACOL0285 | gi 57650036 ref NC_002951.2 :325613-325832   | q1 | q2 | OK     | 46.6688 | 41.3897  | -0.173186 | 0.23288  | 0.815855  | 0.991377 |
| gene276  | gene276  | SACOL0286 | gi 57650036 ref NC_002951.2 :325963-326464   | q1 | q2 | OK     | 18.4662 | 20.3567  | 0.14062   | -0.24845 | 0.803786  | 0.989625 |
| gene277  | gene277  | SACOL0287 | gi 57650036 ref NC_002951.2 :326474-326975   | q1 | q2 | OK     | 2.43893 | 2.07722  | -0.231596 | 0.22201  | 0.824307  | 0.992727 |
| gene278  | gene278  | SACOL0288 | gi 57650036 ref NC_002951.2 :326985-327481   | q1 | q2 | OK     | 27.5925 | 40.0969  | 0.539215  | -1.0339  | 0.301182  | 0.892668 |
| gene279  | gene279  | SACOL0289 | gi 57650036 ref NC_002951.2 :327491-327983   | q1 | q2 | OK     | 3.22321 | 4.2753   | 0.40753   | -0.4604  | 0.645226  | 0.986963 |

|         |         |           |                                            |    |    |        |         |         |           |          |           |          |
|---------|---------|-----------|--------------------------------------------|----|----|--------|---------|---------|-----------|----------|-----------|----------|
| gene28  | gene28  | SACOL0027 | gi 57650036 ref NC_002951.2 :36081-36321   | q1 | q2 | NOTEST | 0       | 0       | 0         | 1        | 1         |          |
| gene280 | gene280 | SACOL0290 | gi 57650036 ref NC_002951.2 :328192-328876 | q1 | q2 | NOTEST | 0       | 0       | 0         | 1        | 1         |          |
| gene281 | gene281 | SACOL0291 | gi 57650036 ref NC_002951.2 :329461-329962 | q1 | q2 | NOTEST | 0       | 0       | 0         | 1        | 1         |          |
| gene282 | gene282 | SACOL0292 | gi 57650036 ref NC_002951.2 :329973-330474 | q1 | q2 | NOTEST | 0       | 0       | 0         | 1        | 1         |          |
| gene283 | gene283 | SACOL0293 | gi 57650036 ref NC_002951.2 :330484-330985 | q1 | q2 | OK     | 14.6336 | 11.6324 | -0.331132 | 0.53872  | 0.590078  | 0.985265 |
| gene284 | gene284 | SACOL0294 | gi 57650036 ref NC_002951.2 :330995-331496 | q1 | q2 | OK     | 3.13577 | 2.49266 | -0.331132 | 0.34244  | 0.732018  | 0.986963 |
| gene285 | gene285 | SACOL0295 | gi 57650036 ref NC_002951.2 :331506-332007 | q1 | q2 | NOTEST | 0       | 0       | 0         | 1        | 1         |          |
| gene286 | gene286 | SACOL0296 | gi 57650036 ref NC_002951.2 :332017-332518 | q1 | q2 | NOTEST | 0       | 0       | 0         | 1        | 1         |          |
| gene287 | gene287 | SACOL0297 | gi 57650036 ref NC_002951.2 :332528-333017 | q1 | q2 | OK     | 3.25345 | 4.31717 | 0.408117  | -0.46107 | 0.64475   | 0.986963 |
| gene288 | gene288 | SACOL0299 | gi 57650036 ref NC_002951.2 :333639-334014 | q1 | q2 | OK     | 82.5807 | 54.9976 | -0.586437 | 1.15493  | 0.248119  | 0.869586 |
| gene289 | gene289 | SACOL0300 | gi 57650036 ref NC_002951.2 :334166-334565 | q1 | q2 | OK     | 97.0981 | 44.623  | -1.12165  | 2.21306  | 0.0268937 | 0.377263 |
| gene29  | gene29  | SACOL0028 | gi 57650036 ref NC_002951.2 :36352-37027   | q1 | q2 | OK     | 739.583 | 664.565 | -0.154301 | 0.1584   | 0.874144  | 0.996932 |
| gene290 | gene290 | SACOL0301 | gi 57650036 ref NC_002951.2 :334780-335626 | q1 | q2 | OK     | 60.1215 | 54.4289 | -0.143508 | 0.29452  | 0.768359  | 0.986963 |
| gene291 | gene291 | brnQ2     | gi 57650036 ref NC_002951.2 :335841-337149 | q1 | q2 | OK     | 69.4295 | 44.8934 | -0.629046 | 1.1882   | 0.234753  | 0.863102 |
| gene292 | gene292 | SACOL0303 | gi 57650036 ref NC_002951.2 :337732-338623 | q1 | q2 | OK     | 47.5647 | 38.4617 | -0.30647  | 0.6342   | 0.52595   | 0.97289  |
| gene293 | gene293 | SACOL0305 | gi 57650036 ref NC_002951.2 :338871-339921 | q1 | q2 | OK     | 149.088 | 233.447 | 0.646936  | -0.85737 | 0.39124   | 0.939607 |
| gene294 | gene294 | SACOL0306 | gi 57650036 ref NC_002951.2 :339933-340611 | q1 | q2 | OK     | 177.898 | 256.313 | 0.526855  | -0.83653 | 0.402858  | 0.939607 |
| gene295 | gene295 | pfoR      | gi 57650036 ref NC_002951.2 :340818-341850 | q1 | q2 | OK     | 117.23  | 134.223 | 0.195295  | -0.31203 | 0.755022  | 0.986963 |
| gene296 | gene296 | SACOL0308 | gi 57650036 ref NC_002951.2 :342192-344209 | q1 | q2 | OK     | 37.1199 | 42.5144 | 0.195759  | -0.25286 | 0.800377  | 0.989625 |
| gene297 | gene297 | SACOL0309 | gi 57650036 ref NC_002951.2 :342192-344209 | q1 | q2 | OK     | 44.5662 | 55.838  | 0.325298  | -0.4198  | 0.674633  | 0.986963 |
| gene298 | gene298 | SACOL0310 | gi 57650036 ref NC_002951.2 :344219-345440 | q1 | q2 | OK     | 22.4199 | 22.799  | 0.0241917 | -0.04999 | 0.960134  | 0.996932 |
| gene299 | gene299 | SACOL0311 | gi 57650036 ref NC_002951.2 :345544-347077 | q1 | q2 | OK     | 43.3114 | 44.5626 | 0.0410867 | -0.07954 | 0.936605  | 0.996932 |
| gene3   | gene3   | recF      | gi 57650036 ref NC_002951.2 :3696-5051     | q1 | q2 | OK     | 376.253 | 168.027 | -1.16301  | 1.15553  | 0.247872  | 0.869586 |
| gene30  | gene30  | SACOL0029 | gi 57650036 ref NC_002951.2 :37284-37452   | q1 | q2 | OK     | 134.556 | 148.007 | 0.137455  | -0.17904 | 0.857904  | 0.996923 |
| gene300 | gene300 | nanA      | gi 57650036 ref NC_002951.2 :347116-347998 | q1 | q2 | OK     | 38.1106 | 38.5784 | 0.017602  | -0.03649 | 0.970894  | 0.997826 |
| gene301 | gene301 | SACOL0313 | gi 57650036 ref NC_002951.2 :348155-349016 | q1 | q2 | OK     | 52.9694 | 61.4138 | 0.213403  | -0.43733 | 0.66187   | 0.986963 |
| gene302 | gene302 | SACOL0314 | gi 57650036 ref NC_002951.2 :349293-350094 | q1 | q2 | OK     | 58.0001 | 73.5756 | 0.343172  | -0.70002 | 0.483914  | 0.963899 |
| gene303 | gene303 | SACOL0315 | gi 57650036 ref NC_002951.2 :350233-350902 | q1 | q2 | OK     | 43.0204 | 46.5006 | 0.112231  | -0.2312  | 0.817161  | 0.991377 |
| gene304 | gene304 | SACOL0316 | gi 57650036 ref NC_002951.2 :351028-352342 | q1 | q2 | OK     | 39.9853 | 59.1507 | 0.564925  | -1.10129 | 0.270771  | 0.875983 |
| gene305 | gene305 | SACOL0317 | gi 57650036 ref NC_002951.2 :352759-354694 | q1 | q2 | OK     | 71.5497 | 84.151  | 0.234034  | -0.3361  | 0.736796  | 0.986963 |
| gene306 | gene306 | int       | gi 57650036 ref NC_002951.2 :354784-355990 | q1 | q2 | OK     | 29.8797 | 42.1309 | 0.49571   | -1.01728 | 0.309019  | 0.892668 |
| gene307 | gene307 | SACOL0319 | gi 57650036 ref NC_002951.2 :356183-356897 | q1 | q2 | OK     | 54.3197 | 43.3091 | -0.326803 | 0.67603  | 0.49902   | 0.964618 |
| gene308 | gene308 | SACOL0320 | gi 57650036 ref NC_002951.2 :356974-357202 | q1 | q2 | OK     | 21.1011 | 37.6798 | 0.836472  | -1.02905 | 0.303456  | 0.892668 |



|         |         |           |                                            |    |    |            |         |           |          |           |          |
|---------|---------|-----------|--------------------------------------------|----|----|------------|---------|-----------|----------|-----------|----------|
| gene309 | gene309 | SACOL0321 | gi 57650036 ref NC_002951.2 :357356-358076 | q1 | q2 | NOTEST 0   | 0       | 0         | 0        | 1         | 1        |
| gene31  | gene31  | SACOL0030 | gi 57650036 ref NC_002951.2 :37549-37780   | q1 | q2 | OK 7.33237 | 7.66727 | 0.0644343 | -0.04979 | 0.960288  | 0.996932 |
| gene310 | gene310 | SACOL0322 | gi 57650036 ref NC_002951.2 :358217-358436 | q1 | q2 | NOTEST 0   | 0       | 0         | 0        | 1         | 1        |
| gene311 | gene311 | SACOL0323 | gi 57650036 ref NC_002951.2 :358450-358759 | q1 | q2 | NOTEST 0   | 0       | 0         | 0        | 1         | 1        |
| gene312 | gene312 | SACOL0324 | gi 57650036 ref NC_002951.2 :358762-358915 | q1 | q2 | NOTEST 0   | 0       | 0         | 0        | 1         | 1        |
| gene313 | gene313 | SACOL0325 | gi 57650036 ref NC_002951.2 :358915-359707 | q1 | q2 | NOTEST 0   | 0       | 0         | 0        | 1         | 1        |
| gene314 | gene314 | SACOL0326 | gi 57650036 ref NC_002951.2 :359707-359932 | q1 | q2 | NOTEST 0   | 0       | 0         | 0        | 1         | 1        |
| gene315 | gene315 | SACOL0327 | gi 57650036 ref NC_002951.2 :359971-360551 | q1 | q2 | NOTEST 0   | 0       | 0         | 0        | 1         | 1        |
| gene316 | gene316 | SACOL0328 | gi 57650036 ref NC_002951.2 :359971-360551 | q1 | q2 | NOTEST 0   | 0       | 0         | 0        | 1         | 1        |
| gene317 | gene317 | SACOL0329 | gi 57650036 ref NC_002951.2 :360604-361172 | q1 | q2 | NOTEST 0   | 0       | 0         | 0        | 1         | 1        |
| gene318 | gene318 | SACOL0330 | gi 57650036 ref NC_002951.2 :360604-361172 | q1 | q2 | NOTEST 0   | 0       | 0         | 0        | 1         | 1        |
| gene319 | gene319 | SACOL0331 | gi 57650036 ref NC_002951.2 :361219-361640 | q1 | q2 | NOTEST 0   | 0       | 0         | 0        | 1         | 1        |
| gene32  | gene32  | SACOL0031 | gi 57650036 ref NC_002951.2 :38328-39072   | q1 | q2 | OK 96.131  | 101.308 | 0.0756795 | -0.14826 | 0.882136  | 0.996932 |
| gene320 | gene320 | SACOL0332 | gi 57650036 ref NC_002951.2 :361219-361640 | q1 | q2 | NOTEST 0   | 0       | 0         | 0        | 1         | 1        |
| gene321 | gene321 | SACOL0333 | gi 57650036 ref NC_002951.2 :361694-361958 | q1 | q2 | OK 36.4917 | 40.1615 | 0.138243  | -0.21373 | 0.83076   | 0.994686 |
| gene322 | gene322 | SACOL0334 | gi 57650036 ref NC_002951.2 :361970-362132 | q1 | q2 | NOTEST 0   | 0       | 0         | 0        | 1         | 1        |
| gene323 | gene323 | SACOL0335 | gi 57650036 ref NC_002951.2 :362221-362539 | q1 | q2 | OK 20.1983 | 42.9422 | 1.08816   | -1.74935 | 0.0802298 | 0.628579 |
| gene324 | gene324 | SACOL0336 | gi 57650036 ref NC_002951.2 :362543-362804 | q1 | q2 | OK 2.51094 | 6.65851 | 1.40697   | -0.95357 | 0.340301  | 0.905587 |
| gene325 | gene325 | SACOL0337 | gi 57650036 ref NC_002951.2 :362813-364070 | q1 | q2 | NOTEST 0   | 0       | 0         | 0        | 1         | 1        |
| gene326 | gene326 | SACOL0338 | gi 57650036 ref NC_002951.2 :362813-364070 | q1 | q2 | NOTEST 0   | 0       | 0         | 0        | 1         | 1        |
| gene327 | gene327 | ssb1      | gi 57650036 ref NC_002951.2 :362813-364070 | q1 | q2 | NOTEST 0   | 0       | 0         | 0        | 1         | 1        |
| gene328 | gene328 | SACOL0340 | gi 57650036 ref NC_002951.2 :364083-367357 | q1 | q2 | OK 51.7871 | 82.6995 | 0.675285  | -0.50044 | 0.616766  | 0.986963 |
| gene329 | gene329 | SACOL0341 | gi 57650036 ref NC_002951.2 :364083-367357 | q1 | q2 | OK 27.9937 | 38.0711 | 0.443592  | -0.25412 | 0.799402  | 0.989562 |
| gene33  | gene33  | maoC      | gi 57650036 ref NC_002951.2 :39168-39597   | q1 | q2 | OK 33.8196 | 42.9492 | 0.344771  | -0.65288 | 0.513837  | 0.971029 |
| gene330 | gene330 | SACOL0342 | gi 57650036 ref NC_002951.2 :364083-367357 | q1 | q2 | OK 89.8796 | 87.2068 | -0.043552 | 0.02173  | 0.982663  | 0.998143 |
| gene331 | gene331 | SACOL0343 | gi 57650036 ref NC_002951.2 :364083-367357 | q1 | q2 | OK 50.9658 | 63.0462 | 0.30688   | -0.30188 | 0.762744  | 0.986963 |
| gene332 | gene332 | SACOL0344 | gi 57650036 ref NC_002951.2 :364083-367357 | q1 | q2 | OK 14.06   | 16.9162 | 0.266805  | -0.02745 | 0.978101  | 0.998143 |
| gene333 | gene333 | SACOL0345 | gi 57650036 ref NC_002951.2 :367359-367581 | q1 | q2 | OK 78.1425 | 150.18  | 0.942517  | -1.60479 | 0.10854   | 0.711606 |
| gene334 | gene334 | SACOL0346 | gi 57650036 ref NC_002951.2 :367590-368417 | q1 | q2 | NOTEST 0   | 0       | 0         | 0        | 1         | 1        |
| gene335 | gene335 | SACOL0347 | gi 57650036 ref NC_002951.2 :367590-368417 | q1 | q2 | OK 21.573  | 22.0072 | 0.0287505 | -0.0484  | 0.961397  | 0.996932 |
| gene336 | gene336 | SACOL0348 | gi 57650036 ref NC_002951.2 :368421-368607 | q1 | q2 | OK 9.03685 | 7.15741 | -0.336382 | 0.16702  | 0.867355  | 0.996923 |
| gene337 | gene337 | SACOL0349 | gi 57650036 ref NC_002951.2 :368607-368865 | q1 | q2 | NOTEST 0   | 0       | 0         | 0        | 1         | 1        |
| gene338 | gene338 | SACOL0350 | gi 57650036 ref NC_002951.2 :368876-369233 | q1 | q2 | NOTEST 0   | 0       | 0         | 0        | 1         | 1        |

|         |         |           |                                            |    |    |        |         |         |           |          |           |          |
|---------|---------|-----------|--------------------------------------------|----|----|--------|---------|---------|-----------|----------|-----------|----------|
| gene339 | gene339 | SACOL0351 | gi 57650036 ref NC_002951.2 :369236-369479 | q1 | q2 | OK     | 15.5171 | 23.2625 | 0.584153  | -0.68285 | 0.494699  | 0.964002 |
| gene34  | gene34  | mecA      | gi 57650036 ref NC_002951.2 :39642-41649   | q1 | q2 | OK     | 627.65  | 529.852 | -0.24437  | 0.22148  | 0.82472   | 0.992748 |
| gene340 | gene340 | SACOL0352 | gi 57650036 ref NC_002951.2 :369492-369699 | q1 | q2 | OK     | 2.78558 | 8.25377 | 1.56708   | -0.75835 | 0.448244  | 0.948742 |
| gene341 | gene341 | SACOL0353 | gi 57650036 ref NC_002951.2 :369701-370981 | q1 | q2 | OK     | 7.94583 | 7.83795 | -0.019722 | 0.00652  | 0.9948    | 0.998143 |
| gene342 | gene342 | SACOL0354 | gi 57650036 ref NC_002951.2 :369701-370981 | q1 | q2 | OK     | 135.138 | 206.267 | 0.610077  | -0.82273 | 0.410661  | 0.939607 |
| gene343 | gene343 | SACOL0355 | gi 57650036 ref NC_002951.2 :369701-370981 | q1 | q2 | OK     | 115.752 | 196.472 | 0.763284  | -0.86099 | 0.389242  | 0.939607 |
| gene344 | gene344 | SACOL0356 | gi 57650036 ref NC_002951.2 :369701-370981 | q1 | q2 | OK     | 112.673 | 150.605 | 0.418627  | -0.29886 | 0.765051  | 0.986963 |
| gene345 | gene345 | dut       | gi 57650036 ref NC_002951.2 :370985-371528 | q1 | q2 | OK     | 91.5426 | 105.335 | 0.202469  | -0.41715 | 0.676571  | 0.986963 |
| gene346 | gene346 | SACOL0358 | gi 57650036 ref NC_002951.2 :371564-372307 | q1 | q2 | OK     | 66.8539 | 82.5377 | 0.304041  | -0.24825 | 0.803943  | 0.989625 |
| gene347 | gene347 | SACOL0359 | gi 57650036 ref NC_002951.2 :371564-372307 | q1 | q2 | NOTEST | 0       | 0       | 0         | 0        | 1         | 1        |
| gene348 | gene348 | SACOL0360 | gi 57650036 ref NC_002951.2 :371564-372307 | q1 | q2 | OK     | 255.091 | 563.527 | 1.14347   | -2.05691 | 0.0396951 | 0.459329 |
| gene349 | gene349 | SACOL0361 | gi 57650036 ref NC_002951.2 :371564-372307 | q1 | q2 | OK     | 25.2198 | 64.6616 | 1.35835   | -0.36555 | 0.714699  | 0.986963 |
| gene35  | gene35  | mecR1     | gi 57650036 ref NC_002951.2 :41748-44481   | q1 | q2 | OK     | 185.168 | 91.4193 | -1.01827  | 1.58441  | 0.1131    | 0.720767 |
| gene350 | gene350 | SACOL0362 | gi 57650036 ref NC_002951.2 :372374-372882 | q1 | q2 | OK     | 12.6711 | 23.9398 | 0.917868  | -0.45574 | 0.648578  | 0.986963 |
| gene351 | gene351 | SACOL0363 | gi 57650036 ref NC_002951.2 :372374-372882 | q1 | q2 | OK     | 36.2478 | 39.2638 | 0.115306  | -0.2     | 0.84148   | 0.996923 |
| gene352 | gene352 | SACOL0364 | gi 57650036 ref NC_002951.2 :372894-373332 | q1 | q2 | OK     | 7.31158 | 9.323   | 0.350612  | -0.48076 | 0.630686  | 0.986963 |
| gene353 | gene353 | SACOL0365 | gi 57650036 ref NC_002951.2 :373488-373803 | q1 | q2 | OK     | 7.92824 | 17.9634 | 1.17999   | -1.46752 | 0.142236  | 0.77306  |
| gene354 | gene354 | SACOL0366 | gi 57650036 ref NC_002951.2 :373931-375918 | q1 | q2 | OK     | 10.9837 | 16.0543 | 0.547597  | -0.38027 | 0.703746  | 0.986963 |
| gene355 | gene355 | SACOL0367 | gi 57650036 ref NC_002951.2 :373931-375918 | q1 | q2 | OK     | 8.12217 | 7.88603 | -0.042566 | 0.07891  | 0.937107  | 0.996932 |
| gene356 | gene356 | SACOL0368 | gi 57650036 ref NC_002951.2 :375922-377918 | q1 | q2 | OK     | 49.9201 | 64.6024 | 0.371966  | -0.60622 | 0.54437   | 0.979019 |
| gene357 | gene357 | SACOL0369 | gi 57650036 ref NC_002951.2 :375922-377918 | q1 | q2 | OK     | 23.1273 | 26.8378 | 0.214672  | -0.17338 | 0.862356  | 0.996923 |
| gene358 | gene358 | SACOL0370 | gi 57650036 ref NC_002951.2 :377929-379093 | q1 | q2 | OK     | 27.0743 | 43.6645 | 0.689534  | -1.41578 | 0.15684   | 0.797219 |
| gene359 | gene359 | SACOL0371 | gi 57650036 ref NC_002951.2 :379161-379440 | q1 | q2 | OK     | 13.6736 | 28.6623 | 1.06777   | -1.42611 | 0.153835  | 0.793468 |
| gene36  | gene36  | SACOL0035 | gi 57650036 ref NC_002951.2 :41748-44481   | q1 | q2 | NOTEST | 0       | 0       | 0         | 0        | 1         | 1        |
| gene360 | gene360 | SACOL0372 | gi 57650036 ref NC_002951.2 :379451-380182 | q1 | q2 | OK     | 18.3503 | 31.6433 | 0.786093  | -0.843   | 0.399226  | 0.939607 |
| gene361 | gene361 | SACOL0373 | gi 57650036 ref NC_002951.2 :379451-380182 | q1 | q2 | OK     | 30.7901 | 48.8365 | 0.665492  | -1.08684 | 0.277107  | 0.879877 |
| gene362 | gene362 | SACOL0374 | gi 57650036 ref NC_002951.2 :380182-380578 | q1 | q2 | OK     | 13.7634 | 18.5959 | 0.434151  | -0.67652 | 0.498709  | 0.964618 |
| gene363 | gene363 | SACOL0375 | gi 57650036 ref NC_002951.2 :380612-381254 | q1 | q2 | OK     | 67.238  | 96.7404 | 0.524841  | -1.07504 | 0.282355  | 0.880646 |
| gene364 | gene364 | SACOL0376 | gi 57650036 ref NC_002951.2 :381345-381801 | q1 | q2 | OK     | 64.8983 | 75.9625 | 0.227106  | -0.46466 | 0.642176  | 0.986963 |
| gene365 | gene365 | SACOL0377 | gi 57650036 ref NC_002951.2 :381858-382209 | q1 | q2 | OK     | 32.4323 | 62.8221 | 0.953842  | -1.74164 | 0.0815721 | 0.629918 |
| gene366 | gene366 | SACOL0378 | gi 57650036 ref NC_002951.2 :382250-382409 | q1 | q2 | OK     | 80.8364 | 153.269 | 0.922992  | -1.00412 | 0.315321  | 0.892668 |
| gene367 | gene367 | SACOL0379 | gi 57650036 ref NC_002951.2 :382422-389447 | q1 | q2 | OK     | 36.7364 | 50.9157 | 0.470902  | -0.49391 | 0.621372  | 0.986963 |
| gene368 | gene368 | SACOL0380 | gi 57650036 ref NC_002951.2 :382422-389447 | q1 | q2 | OK     | 29.2607 | 36.4427 | 0.316667  | -0.09436 | 0.924823  | 0.996932 |

|         |         |           |                                            |    |    |        |          |         |            |           |           |           |
|---------|---------|-----------|--------------------------------------------|----|----|--------|----------|---------|------------|-----------|-----------|-----------|
| gene369 | gene369 | SACOL0381 | gi 57650036 ref NC_002951.2 :389455-391329 | q1 | q2 | OK     | 21.161   | 27.9351 | 0.400672   | -0.79343  | 0.427528  | 0.940178  |
| gene37  | gene37  | SACOL0036 | gi 57650036 ref NC_002951.2 :41748-44481   | q1 | q2 | NOTEST | 0        | 0       | 0          | 0         | 1         | 1         |
| gene370 | gene370 | SACOL0382 | gi 57650036 ref NC_002951.2 :389455-391329 | q1 | q2 | OK     | 22.7679  | 21.899  | -0.056135  | 0.0301    | 0.975986  | 0.998143  |
| gene371 | gene371 | SACOL0383 | gi 57650036 ref NC_002951.2 :391344-395267 | q1 | q2 | OK     | 41.7428  | 57.5429 | 0.463109   | -0.6695   | 0.503179  | 0.965124  |
| gene372 | gene372 | SACOL0384 | gi 57650036 ref NC_002951.2 :391344-395267 | q1 | q2 | OK     | 9.88663  | 15.343  | 0.634025   | -0.39765  | 0.690892  | 0.986963  |
| gene373 | gene373 | SACOL0385 | gi 57650036 ref NC_002951.2 :391344-395267 | q1 | q2 | OK     | 13.0902  | 17.858  | 0.448083   | -0.1267   | 0.899176  | 0.996932  |
| gene374 | gene374 | SACOL0386 | gi 57650036 ref NC_002951.2 :391344-395267 | q1 | q2 | OK     | 41.1774  | 27.3683 | -0.589348  | 0.05194   | 0.958574  | 0.996932  |
| gene375 | gene375 | SACOL0387 | gi 57650036 ref NC_002951.2 :395312-395612 | q1 | q2 | OK     | 12.37    | 14.6183 | 0.240924   | -0.30612  | 0.759515  | 0.986963  |
| gene376 | gene376 | SACOL0388 | gi 57650036 ref NC_002951.2 :395747-396050 | q1 | q2 | OK     | 0.863808 | 2.19347 | 1.34443    | -0.6506   | 0.515304  | 0.971416  |
| gene377 | gene377 | SACOL0389 | gi 57650036 ref NC_002951.2 :396061-397516 | q1 | q2 | OK     | 40.3651  | 54.0509 | 0.421209   | -0.81152  | 0.417067  | 0.939652  |
| gene378 | gene378 | SACOL0390 | gi 57650036 ref NC_002951.2 :398285-398408 | q1 | q2 | OK     | 120.944  | 0       | -1.79769e+ | -1.79769e | 0.117533  | 0.723345  |
| gene379 | gene379 | SACOL0391 | gi 57650036 ref NC_002951.2 :398649-399477 | q1 | q2 | OK     | 8.07146  | 6.96776 | -0.212135  | 0.35628   | 0.721632  | 0.986963  |
| gene38  | gene38  | SACOL0037 | gi 57650036 ref NC_002951.2 :44616-45123   | q1 | q2 | NOTEST | 0        | 0       | 0          | 0         | 1         | 1         |
| gene380 | gene380 | SACOL0392 | gi 57650036 ref NC_002951.2 :399549-400749 | q1 | q2 | OK     | 42.6134  | 40.1694 | -0.085212  | 0.1735    | 0.862261  | 0.996923  |
| gene381 | gene381 | SACOL0393 | gi 57650036 ref NC_002951.2 :400844-400937 | q1 | q2 | NOTEST | 0        | 0       | 0          | 0         | 1         | 1         |
| gene382 | gene382 | SACOL0394 | gi 57650036 ref NC_002951.2 :401050-402052 | q1 | q2 | OK     | 70.0959  | 61.1755 | -0.196374  | 0.38673   | 0.698958  | 0.986963  |
| gene383 | gene383 | SACOL0395 | gi 57650036 ref NC_002951.2 :402085-402418 | q1 | q2 | OK     | 88.9285  | 60.6496 | -0.552148  | 1.06798   | 0.28553   | 0.886237  |
| gene384 | gene384 | SACOL0396 | gi 57650036 ref NC_002951.2 :402418-405153 | q1 | q2 | OK     | 70.6247  | 76.9977 | 0.124642   | -0.1295   | 0.896963  | 0.996932  |
| gene385 | gene385 | SACOL0397 | gi 57650036 ref NC_002951.2 :402418-405153 | q1 | q2 | OK     | 46.3398  | 43.197  | -0.101321  | 0.09103   | 0.927467  | 0.996932  |
| gene386 | gene386 | SACOL0398 | gi 57650036 ref NC_002951.2 :402418-405153 | q1 | q2 | OK     | 34.3889  | 31.0037 | -0.149502  | 0.12041   | 0.904161  | 0.996932  |
| gene387 | gene387 | SACOL0399 | gi 57650036 ref NC_002951.2 :405467-406493 | q1 | q2 | OK     | 109.551  | 55.3573 | -0.984762  | 1.80394   | 0.0712405 | 0.592334  |
| gene388 | gene388 | ulaA      | gi 57650036 ref NC_002951.2 :406585-407932 | q1 | q2 | OK     | 42.987   | 45.5478 | 0.08348    | -0.16574  | 0.868365  | 0.996923  |
| gene389 | gene389 | SACOL0401 | gi 57650036 ref NC_002951.2 :407946-408231 | q1 | q2 | OK     | 39.9044  | 55.3252 | 0.471389   | -0.79937  | 0.424079  | 0.93986   |
| gene39  | gene39  | SACOL0038 | gi 57650036 ref NC_002951.2 :45137-45449   | q1 | q2 | OK     | 13.7608  | 20.4196 | 0.569392   | -0.79113  | 0.428868  | 0.940178  |
| gene390 | gene390 | SACOL0402 | gi 57650036 ref NC_002951.2 :408232-408676 | q1 | q2 | OK     | 17.6694  | 20.7482 | 0.231732   | -0.39323  | 0.694149  | 0.986963  |
| gene391 | gene391 | SACOL0403 | gi 57650036 ref NC_002951.2 :408680-410636 | q1 | q2 | OK     | 26.4592  | 29.4583 | 0.154906   | -0.30937  | 0.757038  | 0.986963  |
| gene392 | gene392 | SACOL0404 | gi 57650036 ref NC_002951.2 :410847-411267 | q1 | q2 | OK     | 130.453  | 33.9902 | -1.94034   | 3.77787   | 0.0001582 | 0.0180535 |
| gene393 | gene393 | SACOL0405 | gi 57650036 ref NC_002951.2 :411373-412729 | q1 | q2 | OK     | 54.6412  | 74.8423 | 0.453865   | -0.82239  | 0.410853  | 0.939607  |
| gene394 | gene394 | SACOL0406 | gi 57650036 ref NC_002951.2 :412832-413273 | q1 | q2 | OK     | 28.4981  | 24.5727 | -0.213812  | 0.38483   | 0.700365  | 0.986963  |
| gene395 | gene395 | glpT      | gi 57650036 ref NC_002951.2 :413355-414714 | q1 | q2 | OK     | 112.116  | 66.4442 | -0.754772  | 1.20816   | 0.226985  | 0.858851  |
| gene396 | gene396 | SACOL0408 | gi 57650036 ref NC_002951.2 :415021-415882 | q1 | q2 | OK     | 345.889  | 310.578 | -0.155351  | 0.18254   | 0.855162  | 0.996923  |
| gene397 | gene397 | SACOL0409 | gi 57650036 ref NC_002951.2 :415961-417023 | q1 | q2 | OK     | 236.162  | 188.751 | -0.323294  | 0.40637   | 0.684469  | 0.986963  |
| gene398 | gene398 | SACOL0410 | gi 57650036 ref NC_002951.2 :417036-417603 | q1 | q2 | OK     | 149.661  | 105.639 | -0.502556  | 0.99918   | 0.317708  | 0.892668  |

|         |         |           |                                            |    |    |        |         |         |           |          |           |           |
|---------|---------|-----------|--------------------------------------------|----|----|--------|---------|---------|-----------|----------|-----------|-----------|
| gene399 | gene399 | SACOL0411 | gi 57650036 ref NC_002951.2 :417662-418658 | q1 | q2 | OK     | 40.5452 | 47.8055 | 0.237646  | -0.4894  | 0.62456   | 0.986963  |
| gene4   | gene4   | gyrB      | gi 57650036 ref NC_002951.2 :5060-6995     | q1 | q2 | OK     | 436.957 | 173.585 | -1.33185  | 1.30549  | 0.191727  | 0.819847  |
| gene40  | gene40  | SACOL0039 | gi 57650036 ref NC_002951.2 :45450-45886   | q1 | q2 | NOTEST | 0       | 0       | 0         | 0        | 1         | 1         |
| gene400 | gene400 | SACOL0412 | gi 57650036 ref NC_002951.2 :418755-419052 | q1 | q2 | OK     | 42.5003 | 54.2212 | 0.351384  | -0.61115 | 0.541103  | 0.979019  |
| gene401 | gene401 | SACOL0413 | gi 57650036 ref NC_002951.2 :419131-419677 | q1 | q2 | OK     | 184.082 | 89.1776 | -1.04559  | 2.0512   | 0.0402473 | 0.459368  |
| gene402 | gene402 | SACOL0414 | gi 57650036 ref NC_002951.2 :419944-423718 | q1 | q2 | OK     | 26.295  | 34.2265 | 0.380325  | -0.21883 | 0.826783  | 0.992851  |
| gene403 | gene403 | SACOL0415 | gi 57650036 ref NC_002951.2 :419944-423718 | q1 | q2 | OK     | 42.389  | 54.4242 | 0.360561  | -0.32701 | 0.74366   | 0.986963  |
| gene404 | gene404 | SACOL0416 | gi 57650036 ref NC_002951.2 :419944-423718 | q1 | q2 | OK     | 35.4161 | 43.3829 | 0.29272   | -0.28931 | 0.772347  | 0.986963  |
| gene405 | gene405 | SACOL0417 | gi 57650036 ref NC_002951.2 :423809-424466 | q1 | q2 | OK     | 61.3785 | 84.2015 | 0.456113  | -0.93954 | 0.347456  | 0.912037  |
| gene406 | gene406 | SACOL0418 | gi 57650036 ref NC_002951.2 :424527-424743 | q1 | q2 | OK     | 100.763 | 87.964  | -0.195986 | 0.31657  | 0.751572  | 0.986963  |
| gene407 | gene407 | SACOL0419 | gi 57650036 ref NC_002951.2 :424851-425241 | q1 | q2 | OK     | 51.3136 | 53.574  | 0.0621916 | -0.1203  | 0.904249  | 0.996932  |
| gene408 | gene408 | SACOL0420 | gi 57650036 ref NC_002951.2 :425481-426395 | q1 | q2 | OK     | 74.1544 | 26.6233 | -1.47784  | 0.50057  | 0.616675  | 0.986963  |
| gene409 | gene409 | SACOL0421 | gi 57650036 ref NC_002951.2 :425481-426395 | q1 | q2 | OK     | 80.4186 | 80.8935 | 0.0084953 | -0.01683 | 0.986576  | 0.998143  |
| gene41  | gene41  | SACOL0040 | gi 57650036 ref NC_002951.2 :45450-45886   | q1 | q2 | NOTEST | 0       | 0       | 0         | 0        | 1         | 1         |
| gene410 | gene410 | SACOL0422 | gi 57650036 ref NC_002951.2 :426419-427891 | q1 | q2 | OK     | 33.2827 | 38.8541 | 0.223296  | -0.29076 | 0.771232  | 0.986963  |
| gene411 | gene411 | SACOL0424 | gi 57650036 ref NC_002951.2 :426419-427891 | q1 | q2 | OK     | 67.484  | 67.7019 | 0.0046506 | -0.00685 | 0.994535  | 0.998143  |
| gene412 | gene412 | SACOL0425 | gi 57650036 ref NC_002951.2 :428257-429391 | q1 | q2 | OK     | 42.4135 | 51.7142 | 0.286036  | -0.57825 | 0.563096  | 0.985191  |
| gene413 | gene413 | SACOL0426 | gi 57650036 ref NC_002951.2 :429929-431111 | q1 | q2 | OK     | 108.085 | 51.8771 | -1.05899  | 1.85587  | 0.0634724 | 0.55727   |
| gene414 | gene414 | SACOL0427 | gi 57650036 ref NC_002951.2 :431193-431946 | q1 | q2 | OK     | 52.8687 | 65.6229 | 0.311784  | -0.6436  | 0.519833  | 0.971416  |
| gene415 | gene415 | metE      | gi 57650036 ref NC_002951.2 :431988-438284 | q1 | q2 | OK     | 28.2274 | 38.7772 | 0.458113  | -0.33345 | 0.738797  | 0.986963  |
| gene416 | gene416 | SACOL0429 | gi 57650036 ref NC_002951.2 :431988-438284 | q1 | q2 | OK     | 27.7096 | 40.6478 | 0.552793  | -0.36546 | 0.71477   | 0.986963  |
| gene417 | gene417 | SACOL0430 | gi 57650036 ref NC_002951.2 :431988-438284 | q1 | q2 | OK     | 34.6155 | 42.4466 | 0.294231  | -0.15913 | 0.873568  | 0.996932  |
| gene418 | gene418 | SACOL0431 | gi 57650036 ref NC_002951.2 :431988-438284 | q1 | q2 | OK     | 34.3768 | 39.0438 | 0.183658  | -0.09396 | 0.925142  | 0.996932  |
| gene419 | gene419 | SACOL0432 | gi 57650036 ref NC_002951.2 :438947-439793 | q1 | q2 | OK     | 59.7799 | 52.8339 | -0.178196 | 0.36607  | 0.714313  | 0.986963  |
| gene42  | gene42  | ccrB      | gi 57650036 ref NC_002951.2 :46351-47976   | q1 | q2 | NOTEST | 0       | 0       | 0         | 0        | 1         | 1         |
| gene420 | gene420 | SACOL0433 | gi 57650036 ref NC_002951.2 :439949-440831 | q1 | q2 | OK     | 47.0301 | 45.9537 | -0.033403 | 0.06911  | 0.944903  | 0.996932  |
| gene421 | gene421 | SACOL0434 | gi 57650036 ref NC_002951.2 :440860-441064 | q1 | q2 | OK     | 56.3573 | 26.6233 | -1.08191  | 1.23065  | 0.218452  | 0.842602  |
| gene422 | gene422 | SACOL0435 | gi 57650036 ref NC_002951.2 :441075-442173 | q1 | q2 | OK     | 104.294 | 58.6606 | -0.830199 | 1.49686  | 0.134431  | 0.751793  |
| gene423 | gene423 | SACOL0436 | gi 57650036 ref NC_002951.2 :442258-442450 | q1 | q2 | OK     | 278.014 | 171.049 | -0.700748 | 1.19046  | 0.233864  | 0.863102  |
| gene424 | gene424 | rpsF      | gi 57650036 ref NC_002951.2 :442693-442990 | q1 | q2 | OK     | 380.694 | 88.8306 | -2.09951  | 4.1046   | 4.05E-05  | 0.0084086 |
| gene425 | gene425 | ssb2      | gi 57650036 ref NC_002951.2 :443010-443514 | q1 | q2 | OK     | 647.43  | 139.109 | -2.21851  | 3.21928  | 0.0012851 | 0.0620574 |
| gene426 | gene426 | rpsR      | gi 57650036 ref NC_002951.2 :443565-443808 | q1 | q2 | OK     | 741.716 | 277.036 | -1.42079  | 2.83425  | 0.0045934 | 0.137671  |
| gene427 | gene427 | SACOL0440 | gi 57650036 ref NC_002951.2 :444073-445012 | q1 | q2 | OK     | 22.6748 | 34.7968 | 0.617866  | -1.26652 | 0.205327  | 0.823151  |

|         |         |           |                                            |    |    |        |         |         |           |          |           |          |
|---------|---------|-----------|--------------------------------------------|----|----|--------|---------|---------|-----------|----------|-----------|----------|
| gene428 | gene428 | SACOL0441 | gi 57650036 ref NC_002951.2 :445050-445598 | q1 | q2 | OK     | 121.463 | 147.333 | 0.278567  | -0.55587 | 0.5783    | 0.985265 |
| gene429 | gene429 | SACOL0442 | gi 57650036 ref NC_002951.2 :445957-446569 | q1 | q2 | OK     | 23.2351 | 37.5804 | 0.693673  | -1.36044 | 0.173691  | 0.819812 |
| gene43  | gene43  | ccrA1     | gi 57650036 ref NC_002951.2 :47997-49347   | q1 | q2 | NOTEST | 0       | 0       | 0         | 0        | 1         | 1        |
| gene430 | gene430 | SACOL0443 | gi 57650036 ref NC_002951.2 :446937-447306 | q1 | q2 | OK     | 20.8312 | 39.0268 | 0.90572   | -1.54867 | 0.12146   | 0.72789  |
| gene431 | gene431 | SACOL0444 | gi 57650036 ref NC_002951.2 :447486-448059 | q1 | q2 | OK     | 251.932 | 1000.18 | 1.98915   | -2.40108 | 0.0163466 | 0.299437 |
| gene432 | gene432 | SACOL0445 | gi 57650036 ref NC_002951.2 :448196-448460 | q1 | q2 | OK     | 117.99  | 72.2906 | -0.706782 | 1.29623  | 0.194897  | 0.819847 |
| gene433 | gene433 | SACOL0446 | gi 57650036 ref NC_002951.2 :448759-449011 | q1 | q2 | OK     | 1751.16 | 6201.63 | 1.82434   | -2.06564 | 0.0388626 | 0.454271 |
| gene434 | gene434 | SACOL0447 | gi 57650036 ref NC_002951.2 :449436-450018 | q1 | q2 | OK     | 54.3285 | 68.2224 | 0.328537  | -0.67921 | 0.497003  | 0.964002 |
| gene435 | gene435 | SACOL0448 | gi 57650036 ref NC_002951.2 :450083-450467 | q1 | q2 | OK     | 76.4294 | 70.2747 | -0.121122 | 0.24254  | 0.808364  | 0.991115 |
| gene436 | gene436 | SACOL0449 | gi 57650036 ref NC_002951.2 :450721-451348 | q1 | q2 | OK     | 100.501 | 89.5888 | -0.165812 | 0.33707  | 0.736062  | 0.986963 |
| gene437 | gene437 | SACOL0450 | gi 57650036 ref NC_002951.2 :451420-451714 | q1 | q2 | OK     | 36.1115 | 48.5569 | 0.42722   | -0.71907 | 0.472096  | 0.958312 |
| gene438 | gene438 | ahpF      | gi 57650036 ref NC_002951.2 :451792-453316 | q1 | q2 | OK     | 3253.56 | 2072.71 | -0.650501 | 0.65952  | 0.509563  | 0.971029 |
| gene439 | gene439 | ahpC      | gi 57650036 ref NC_002951.2 :453331-453901 | q1 | q2 | OK     | 5093.95 | 4099.97 | -0.31317  | 0.29455  | 0.768337  | 0.986963 |
| gene44  | gene44  | SACOL0043 | gi 57650036 ref NC_002951.2 :49534-51600   | q1 | q2 | NOTEST | 0       | 0       | 0         | 0        | 1         | 1        |
| gene440 | gene440 | SACOL0453 | gi 57650036 ref NC_002951.2 :454392-455148 | q1 | q2 | OK     | 353.808 | 495.017 | 0.484511  | -0.55399 | 0.579586  | 0.985265 |
| gene441 | gene441 | SACOL0454 | gi 57650036 ref NC_002951.2 :455228-456617 | q1 | q2 | OK     | 124.236 | 82.2232 | -0.595469 | 0.8894   | 0.373791  | 0.931139 |
| gene442 | gene442 | SACOL0455 | gi 57650036 ref NC_002951.2 :457593-458550 | q1 | q2 | OK     | 246.218 | 165.84  | -0.570138 | 0.76603  | 0.443661  | 0.948114 |
| gene443 | gene443 | SACOL0456 | gi 57650036 ref NC_002951.2 :458667-459330 | q1 | q2 | OK     | 211.161 | 182.544 | -0.210098 | 0.35185  | 0.724952  | 0.986963 |
| gene444 | gene444 | SACOL0457 | gi 57650036 ref NC_002951.2 :459472-459880 | q1 | q2 | OK     | 1068    | 1550.53 | 0.537844  | -0.57673 | 0.564125  | 0.985191 |
| gene445 | gene445 | xpt       | gi 57650036 ref NC_002951.2 :460391-462238 | q1 | q2 | OK     | 86.3208 | 62.3988 | -0.468189 | 0.34461  | 0.730391  | 0.986963 |
| gene446 | gene446 | pbuX      | gi 57650036 ref NC_002951.2 :460391-462238 | q1 | q2 | OK     | 86.6063 | 84.3665 | -0.037801 | 0.04941  | 0.960592  | 0.996932 |
| gene447 | gene447 | guaB      | gi 57650036 ref NC_002951.2 :462275-463742 | q1 | q2 | OK     | 379.166 | 150.443 | -1.33361  | 1.43184  | 0.152191  | 0.793468 |
| gene448 | gene448 | guaA      | gi 57650036 ref NC_002951.2 :463766-465308 | q1 | q2 | OK     | 309.276 | 148.175 | -1.06159  | 1.15064  | 0.249881  | 0.870749 |
| gene449 | gene449 | SACOL0462 | gi 57650036 ref NC_002951.2 :465420-465957 | q1 | q2 | OK     | 27.9737 | 34.3376 | 0.29572   | -0.57154 | 0.567631  | 0.985265 |
| gene45  | gene45  | SACOL0044 | gi 57650036 ref NC_002951.2 :49534-51600   | q1 | q2 | NOTEST | 0       | 0       | 0         | 0        | 1         | 1        |
| gene450 | gene450 | SACOL0463 | gi 57650036 ref NC_002951.2 :466349-467054 | q1 | q2 | OK     | 22.2223 | 37.7256 | 0.763533  | -1.524   | 0.127509  | 0.732663 |
| gene451 | gene451 | SACOL0464 | gi 57650036 ref NC_002951.2 :467452-467725 | q1 | q2 | OK     | 17.7941 | 24.6967 | 0.472918  | -0.63719 | 0.524001  | 0.972546 |
| gene452 | gene452 | SACOL0465 | gi 57650036 ref NC_002951.2 :467985-468138 | q1 | q2 | OK     | 25.2198 | 21.5539 | -0.226614 | 0.11252  | 0.910413  | 0.996932 |
| gene453 | gene453 | SACOL0466 | gi 57650036 ref NC_002951.2 :468661-469021 | q1 | q2 | OK     | 137.547 | 93.1904 | -0.561676 | 1.14853  | 0.250748  | 0.872063 |
| gene454 | gene454 | SACOL0467 | gi 57650036 ref NC_002951.2 :469039-469885 | q1 | q2 | OK     | 131.516 | 89.5185 | -0.554977 | 1.01154  | 0.311758  | 0.892668 |
| gene455 | gene455 | SACOL0468 | gi 57650036 ref NC_002951.2 :470356-471037 | q1 | q2 | OK     | 65.9537 | 128.977 | 0.967592  | -1.91654 | 0.055296  | 0.538882 |
| gene456 | gene456 | SACOL0469 | gi 57650036 ref NC_002951.2 :471322-472018 | q1 | q2 | OK     | 61.6618 | 85.791  | 0.476451  | -0.97613 | 0.328999  | 0.900771 |
| gene457 | gene457 | SACOL0470 | gi 57650036 ref NC_002951.2 :472308-473367 | q1 | q2 | OK     | 70.6719 | 95.3778 | 0.432517  | -0.79389 | 0.427262  | 0.940178 |

|         |         |           |                                            |    |    |        |          |          |           |          |           |           |
|---------|---------|-----------|--------------------------------------------|----|----|--------|----------|----------|-----------|----------|-----------|-----------|
| gene458 | gene458 | SACOL0471 | gi 57650036 ref NC_002951.2 :473485-473623 | q1 | q2 | OK     | 24.2282  | 42.8646  | 0.823101  | -0.34933 | 0.726841  | 0.986963  |
| gene459 | gene459 | SACOL0472 | gi 57650036 ref NC_002951.2 :473731-474658 | q1 | q2 | OK     | 101.898  | 139.121  | 0.449215  | -0.76855 | 0.442161  | 0.947261  |
| gene46  | gene46  | SACOL0045 | gi 57650036 ref NC_002951.2 :51770-53348   | q1 | q2 | NOTEST | 0        | 0        | 0         | 0        | 1         | 1         |
| gene460 | gene460 | SACOL0473 | gi 57650036 ref NC_002951.2 :475037-475736 | q1 | q2 | OK     | 20.5103  | 32.7851  | 0.676696  | -1.33495 | 0.181893  | 0.819812  |
| gene461 | gene461 | SACOL0474 | gi 57650036 ref NC_002951.2 :476101-476785 | q1 | q2 | OK     | 33.6829  | 47.7473  | 0.503405  | -1.03036 | 0.302839  | 0.892668  |
| gene462 | gene462 | SACOL0475 | gi 57650036 ref NC_002951.2 :476869-476971 | q1 | q2 | NOTEST | 0        | 0        | 0         | 0        | 1         | 1         |
| gene463 | gene463 | hsdM1     | gi 57650036 ref NC_002951.2 :477048-479809 | q1 | q2 | OK     | 42.3125  | 43.592   | 0.0429781 | -0.03876 | 0.969084  | 0.996932  |
| gene464 | gene464 | SACOL0477 | gi 57650036 ref NC_002951.2 :477048-479809 | q1 | q2 | OK     | 68.6162  | 94.0492  | 0.454866  | -0.48912 | 0.624759  | 0.986963  |
| gene465 | gene465 | SACOL0478 | gi 57650036 ref NC_002951.2 :480191-480869 | q1 | q2 | OK     | 16.1312  | 31.2381  | 0.953451  | -1.83336 | 0.0667493 | 0.57234   |
| gene466 | gene466 | SACOL0479 | gi 57650036 ref NC_002951.2 :480890-482399 | q1 | q2 | OK     | 27.6948  | 34.5004  | 0.316999  | -0.64617 | 0.518166  | 0.971416  |
| gene467 | gene467 | SACOL0480 | gi 57650036 ref NC_002951.2 :482502-482811 | q1 | q2 | OK     | 578.761  | 8212.11  | 3.82671   | -4.3713  | 1.24E-05  | 0.0051687 |
| gene468 | gene468 | SACOL0481 | gi 57650036 ref NC_002951.2 :483148-483949 | q1 | q2 | OK     | 14.0884  | 13.6885  | -0.04154  | 0.07749  | 0.938233  | 0.996932  |
| gene469 | gene469 | SACOL0482 | gi 57650036 ref NC_002951.2 :483980-484772 | q1 | q2 | NOTEST | 0        | 0        | 0         | 0        | 1         | 1         |
| gene47  | gene47  | SACOL0046 | gi 57650036 ref NC_002951.2 :53427-54756   | q1 | q2 | NOTEST | 0        | 0        | 0         | 0        | 1         | 1         |
| gene470 | gene470 | SACOL0483 | gi 57650036 ref NC_002951.2 :484841-485618 | q1 | q2 | NOTEST | 0        | 0        | 0         | 0        | 1         | 1         |
| gene471 | gene471 | SACOL0484 | gi 57650036 ref NC_002951.2 :485793-486609 | q1 | q2 | NOTEST | 0.178722 | 0.417634 | 1.22452   | -0.59258 | 0.553466  | 1         |
| gene472 | gene472 | SACOL0485 | gi 57650036 ref NC_002951.2 :486627-487413 | q1 | q2 | OK     | 32.2355  | 34.8528  | 0.112626  | -0.23105 | 0.817277  | 0.991377  |
| gene473 | gene473 | SACOL0486 | gi 57650036 ref NC_002951.2 :487592-490046 | q1 | q2 | OK     | 152.986  | 146.798  | -0.059566 | 0.05201  | 0.958523  | 0.996932  |
| gene474 | gene474 | SACOL0487 | gi 57650036 ref NC_002951.2 :487592-490046 | q1 | q2 | OK     | 65.0516  | 71.3695  | 0.133723  | -0.10565 | 0.915861  | 0.996932  |
| gene475 | gene475 | SACOL0488 | gi 57650036 ref NC_002951.2 :487592-490046 | q1 | q2 | OK     | 100.069  | 161.706  | 0.692387  | -0.26643 | 0.789912  | 0.986986  |
| gene476 | gene476 | SACOL0489 | gi 57650036 ref NC_002951.2 :490064-490379 | q1 | q2 | OK     | 42.8125  | 77.8413  | 0.862505  | -1.58171 | 0.113717  | 0.720767  |
| gene477 | gene477 | SACOL0490 | gi 57650036 ref NC_002951.2 :490668-490929 | q1 | q2 | OK     | 45.197   | 39.951   | -0.177993 | 0.27935  | 0.779973  | 0.986963  |
| gene478 | gene478 | SACOL0491 | gi 57650036 ref NC_002951.2 :491047-492250 | q1 | q2 | OK     | 58.8148  | 84.5095  | 0.522935  | -0.95724 | 0.338445  | 0.905587  |
| gene479 | gene479 | nuoF      | gi 57650036 ref NC_002951.2 :493837-495322 | q1 | q2 | OK     | 80.7344  | 59.5081  | -0.440098 | 0.74803  | 0.454442  | 0.950129  |
| gene48  | gene48  | SACOL0047 | gi 57650036 ref NC_002951.2 :54774-55842   | q1 | q2 | NOTEST | 0        | 0        | 0         | 0        | 1         | 1         |
| gene480 | gene480 | SACOL0495 | gi 57650036 ref NC_002951.2 :495334-498040 | q1 | q2 | OK     | 148.089  | 97.9048  | -0.597014 | 0.63712  | 0.524049  | 0.972546  |
| gene481 | gene481 | SACOL0496 | gi 57650036 ref NC_002951.2 :498201-498564 | q1 | q2 | OK     | 231.464  | 132.7    | -0.80262  | 1.64173  | 0.100646  | 0.684988  |
| gene482 | gene482 | SACOL0497 | gi 57650036 ref NC_002951.2 :498792-499140 | q1 | q2 | OK     | 60.1333  | 75.951   | 0.336906  | -0.65432 | 0.512908  | 0.971029  |
| gene483 | gene483 | SACOL0498 | gi 57650036 ref NC_002951.2 :499246-499921 | q1 | q2 | OK     | 55.0802  | 52.3808  | -0.072494 | 0.15024  | 0.880579  | 0.996932  |
| gene484 | gene484 | SACOL0499 | gi 57650036 ref NC_002951.2 :499957-500692 | q1 | q2 | OK     | 72.3258  | 73.2686  | 0.0186844 | -0.03819 | 0.969537  | 0.996932  |
| gene485 | gene485 | SACOL0500 | gi 57650036 ref NC_002951.2 :500801-500918 | q1 | q2 | OK     | 599.12   | 967.293  | 0.691108  | -0.64454 | 0.519224  | 0.971416  |
| gene486 | gene486 | SACOL0501 | gi 57650036 ref NC_002951.2 :501147-502485 | q1 | q2 | OK     | 33.9226  | 46.246   | 0.447083  | -0.89907 | 0.368614  | 0.928011  |
| gene487 | gene487 | SACOL0502 | gi 57650036 ref NC_002951.2 :502701-504742 | q1 | q2 | OK     | 70.6784  | 91.1972  | 0.367719  | -0.31233 | 0.754794  | 0.986963  |

|         |         |             |                                            |    |    |        |         |         |            |           |           |          |
|---------|---------|-------------|--------------------------------------------|----|----|--------|---------|---------|------------|-----------|-----------|----------|
| gene488 | gene488 | SACOL0503   | gi 57650036 ref NC_002951.2 :502701-504742 | q1 | q2 | OK     | 104.46  | 87.3106 | -0.258726  | 0.27517   | 0.783188  | 0.986963 |
| gene489 | gene489 | SACOL0504   | gi 57650036 ref NC_002951.2 :505035-506061 | q1 | q2 | OK     | 112.25  | 60.3755 | -0.894675  | 1.62157   | 0.104896  | 0.694968 |
| gene49  | gene49  | SACOL0048   | gi 57650036 ref NC_002951.2 :55980-56241   | q1 | q2 | NOTEST | 0       | 0       | 0          | 0         | 1         | 1        |
| gene490 | gene490 | SACOL0505   | gi 57650036 ref NC_002951.2 :506064-506724 | q1 | q2 | OK     | 73.9577 | 59.0139 | -0.325644  | 0.67304   | 0.50092   | 0.965124 |
| gene491 | gene491 | SACOL0506   | gi 57650036 ref NC_002951.2 :506760-507603 | q1 | q2 | OK     | 110.313 | 86.3202 | -0.353834  | 0.66898   | 0.50351   | 0.965124 |
| gene492 | gene492 | SACOL0507   | gi 57650036 ref NC_002951.2 :507934-508939 | q1 | q2 | OK     | 227.236 | 536.509 | 1.23941    | -1.34926  | 0.177253  | 0.819812 |
| gene493 | gene493 | SACOL0508   | gi 57650036 ref NC_002951.2 :509123-509393 | q1 | q2 | OK     | 87.0123 | 49.527  | -0.813003  | 1.41736   | 0.156377  | 0.797219 |
| gene494 | gene494 | SACOL0509   | gi 57650036 ref NC_002951.2 :509541-510412 | q1 | q2 | OK     | 36.1926 | 35.9521 | -0.009618  | 0.00971   | 0.99225   | 0.998143 |
| gene495 | gene495 | SACOL0510   | gi 57650036 ref NC_002951.2 :509541-510412 | q1 | q2 | OK     | 94.5137 | 68.0139 | -0.474694  | 0.85175   | 0.394352  | 0.939607 |
| gene496 | gene496 | SACOL0511   | gi 57650036 ref NC_002951.2 :510580-512472 | q1 | q2 | OK     | 45.3879 | 43.6185 | -0.057368  | 0.07431   | 0.940765  | 0.996932 |
| gene497 | gene497 | SACOL0512   | gi 57650036 ref NC_002951.2 :510580-512472 | q1 | q2 | OK     | 32.7017 | 37.8131 | 0.209522   | -0.29996  | 0.764207  | 0.986963 |
| gene498 | gene498 | gltC        | gi 57650036 ref NC_002951.2 :512592-513477 | q1 | q2 | OK     | 39.4043 | 51.4065 | 0.383597   | -0.79294  | 0.427816  | 0.940178 |
| gene499 | gene499 | gltB        | gi 57650036 ref NC_002951.2 :513657-518157 | q1 | q2 | OK     | 87.8914 | 73.9475 | -0.249219  | 0.25613   | 0.797853  | 0.98885  |
| gene5   | gene5   | gyrA        | gi 57650036 ref NC_002951.2 :7031-9695     | q1 | q2 | OK     | 238.383 | 98.6026 | -1.27359   | 1.30195   | 0.192934  | 0.819847 |
| gene50  | gene50  | SACOL0049   | gi 57650036 ref NC_002951.2 :56264-56996   | q1 | q2 | NOTEST | 0       | 0       | 0          | 0         | 1         | 1        |
| gene500 | gene500 | gltD        | gi 57650036 ref NC_002951.2 :518174-519638 | q1 | q2 | OK     | 61.5106 | 57.5934 | -0.094932  | 0.1724    | 0.863126  | 0.996923 |
| gene501 | gene501 | SACOL_tRNA- | gi 57650036 ref NC_002951.2 :519906-519999 | q1 | q2 | OK     | 16848.8 | 0       | -1.79769e+ | -1.79769e | 0.117533  | 0.723345 |
| gene502 | gene502 | SACOL0516   | gi 57650036 ref NC_002951.2 :520469-521897 | q1 | q2 | OK     | 204.502 | 90.1618 | -1.18153   | 1.52432   | 0.12743   | 0.732663 |
| gene503 | gene503 | SACOL0517   | gi 57650036 ref NC_002951.2 :521960-523601 | q1 | q2 | OK     | 69.428  | 68.3778 | -0.02199   | 0.0361    | 0.971201  | 0.997826 |
| gene504 | gene504 | SACOL0518   | gi 57650036 ref NC_002951.2 :523625-524354 | q1 | q2 | OK     | 63.602  | 53.4973 | -0.249606  | 0.51614   | 0.60576   | 0.986963 |
| gene505 | gene505 | SACOL0519   | gi 57650036 ref NC_002951.2 :524992-525517 | q1 | q2 | OK     | 74.7301 | 30.9055 | -1.27383   | 2.53692   | 0.0111834 | 0.246329 |
| gene506 | gene506 | dnaX        | gi 57650036 ref NC_002951.2 :525585-527283 | q1 | q2 | OK     | 136.93  | 111.451 | -0.297031  | 0.37267   | 0.709398  | 0.986963 |
| gene507 | gene507 | SACOL0521   | gi 57650036 ref NC_002951.2 :527372-527690 | q1 | q2 | OK     | 897.272 | 490.907 | -0.870095  | 1.41647   | 0.156637  | 0.797219 |
| gene508 | gene508 | recR        | gi 57650036 ref NC_002951.2 :527696-528293 | q1 | q2 | OK     | 234.554 | 113.312 | -1.04963   | 1.89161   | 0.0585426 | 0.540443 |
| gene509 | gene509 | rrsA        | gi 57650036 ref NC_002951.2 :529145-530700 | q1 | q2 | OK     | 10964.8 | 8763.39 | -0.323324  | 0.41216   | 0.680222  | 0.986963 |
| gene51  | gene51  | pls         | gi 57650036 ref NC_002951.2 :57211-61858   | q1 | q2 | NOTEST | 0       | 0       | 0          | 0         | 1         | 1        |
| gene510 | gene510 | rrlA        | gi 57650036 ref NC_002951.2 :531064-533987 | q1 | q2 | OK     | 33446.6 | 23465.2 | -0.511339  | 1.25136   | 0.210803  | 0.830641 |
| gene511 | gene511 | rrfA        | gi 57650036 ref NC_002951.2 :534059-534174 | q1 | q2 | OK     | 115401  | 115897  | 0.0061866  | -0.01067  | 0.991488  | 0.998143 |
| gene512 | gene512 | SACOL0523   | gi 57650036 ref NC_002951.2 :535056-536394 | q1 | q2 | OK     | 36.2962 | 38.9199 | 0.100691   | -0.2044   | 0.838039  | 0.996923 |
| gene513 | gene513 | tmk         | gi 57650036 ref NC_002951.2 :536395-537013 | q1 | q2 | OK     | 51.5156 | 50.4292 | -0.03075   | 0.06341   | 0.94944   | 0.996932 |
| gene514 | gene514 | SACOL0525   | gi 57650036 ref NC_002951.2 :537040-537370 | q1 | q2 | OK     | 1441.47 | 812.508 | -0.82709   | 1.08087   | 0.279755  | 0.879877 |
| gene515 | gene515 | SACOL0526   | gi 57650036 ref NC_002951.2 :537583-538510 | q1 | q2 | OK     | 77.1862 | 118.688 | 0.620762   | -1.13473  | 0.256488  | 0.875983 |
| gene516 | gene516 | SACOL0527   | gi 57650036 ref NC_002951.2 :538510-539314 | q1 | q2 | OK     | 147.32  | 133.457 | -0.142576  | 0.24679   | 0.80507   | 0.989715 |

|         |         |           |                                            |    |    |        |         |         |            |            |           |           |
|---------|---------|-----------|--------------------------------------------|----|----|--------|---------|---------|------------|------------|-----------|-----------|
| gene517 | gene517 | SACOL0528 | gi 57650036 ref NC_002951.2 :539330-539678 | q1 | q2 | OK     | 98.929  | 70.3547 | -0.491747  | 0.97629    | 0.32892   | 0.900771  |
| gene518 | gene518 | SACOL0529 | gi 57650036 ref NC_002951.2 :539951-540918 | q1 | q2 | OK     | 59.7925 | 62.3119 | 0.0595436  | -0.11122   | 0.911445  | 0.996932  |
| gene519 | gene519 | SACOL0530 | gi 57650036 ref NC_002951.2 :539951-540918 | q1 | q2 | OK     | 105.069 | 71.8592 | -0.548096  | 0.4423     | 0.658275  | 0.986963  |
| gene52  | gene52  | SACOL0051 | gi 57650036 ref NC_002951.2 :61981-63598   | q1 | q2 | NOTEST | 0       | 0       | 0          | 0          | 1         | 1         |
| gene520 | gene520 | SACOL0531 | gi 57650036 ref NC_002951.2 :540919-541759 | q1 | q2 | OK     | 41.5309 | 47.6827 | 0.199281   | -0.413     | 0.679608  | 0.986963  |
| gene521 | gene521 | SACOL0532 | gi 57650036 ref NC_002951.2 :541783-541939 | q1 | q2 | OK     | 11.2616 | 0       | -1.79769e+ | -1.79769e  | 0.201324  | 0.819847  |
| gene522 | gene522 | metS      | gi 57650036 ref NC_002951.2 :542043-544017 | q1 | q2 | OK     | 89.666  | 55.8883 | -0.682016  | 1.00001    | 0.317306  | 0.892668  |
| gene523 | gene523 | SACOL0534 | gi 57650036 ref NC_002951.2 :544047-544821 | q1 | q2 | OK     | 200.309 | 111.824 | -0.840995  | 1.40733    | 0.159329  | 0.801753  |
| gene524 | gene524 | SACOL0535 | gi 57650036 ref NC_002951.2 :544987-545524 | q1 | q2 | OK     | 66.9483 | 74.2738 | 0.149807   | -0.31019   | 0.75642   | 0.986963  |
| gene525 | gene525 | ksgA      | gi 57650036 ref NC_002951.2 :545534-546428 | q1 | q2 | OK     | 43.2211 | 57.2633 | 0.405873   | -0.83508   | 0.403676  | 0.939607  |
| gene526 | gene526 | SACOL0537 | gi 57650036 ref NC_002951.2 :546527-546791 | q1 | q2 | OK     | 481.69  | 4276.39 | 3.15022    | -4.07065   | 4.69E-05  | 0.0084086 |
| gene527 | gene527 | ipk       | gi 57650036 ref NC_002951.2 :547100-547949 | q1 | q2 | OK     | 112.06  | 113.726 | 0.0212944  | -0.0388    | 0.969052  | 0.996932  |
| gene528 | gene528 | purR      | gi 57650036 ref NC_002951.2 :547962-548787 | q1 | q2 | OK     | 157.232 | 121.476 | -0.372228  | 0.63654    | 0.524424  | 0.972546  |
| gene529 | gene529 | SACOL0540 | gi 57650036 ref NC_002951.2 :548803-549184 | q1 | q2 | OK     | 593.895 | 1396.06 | 1.23308    | -1.53974   | 0.123624  | 0.732386  |
| gene53  | gene53  | SACOL0052 | gi 57650036 ref NC_002951.2 :63757-65269   | q1 | q2 | NOTEST | 0       | 0       | 0          | 0          | 1         | 1         |
| gene530 | gene530 | spoVG     | gi 57650036 ref NC_002951.2 :549255-549558 | q1 | q2 | OK     | 1372.59 | 2812.02 | 1.03471    | -1.17241   | 0.241033  | 0.865486  |
| gene531 | gene531 | SACOL0542 | gi 57650036 ref NC_002951.2 :549747-549879 | q1 | q2 | OK     | 0       | 60.3816 | 1.79769e+3 | 1.79769e+0 | 0.18455   | 0.819812  |
| gene532 | gene532 | glmU      | gi 57650036 ref NC_002951.2 :549901-551254 | q1 | q2 | OK     | 231.324 | 90.2895 | -1.35729   | 1.74291    | 0.0813497 | 0.629918  |
| gene533 | gene533 | prsA      | gi 57650036 ref NC_002951.2 :551400-552366 | q1 | q2 | OK     | 321.052 | 111.597 | -1.5245    | 2.0344     | 0.0419109 | 0.472836  |
| gene534 | gene534 | rplY      | gi 57650036 ref NC_002951.2 :552515-553169 | q1 | q2 | OK     | 454.484 | 193.605 | -1.23111   | 1.69388    | 0.0902886 | 0.653356  |
| gene535 | gene535 | pth       | gi 57650036 ref NC_002951.2 :553479-560527 | q1 | q2 | OK     | 132.264 | 136.542 | 0.0459168  | -0.01311   | 0.989542  | 0.998143  |
| gene536 | gene536 | mfd       | gi 57650036 ref NC_002951.2 :553479-560527 | q1 | q2 | OK     | 68.9847 | 67.3526 | -0.034544  | 0.02036    | 0.983759  | 0.998143  |
| gene537 | gene537 | SACOL0548 | gi 57650036 ref NC_002951.2 :553479-560527 | q1 | q2 | OK     | 89.9002 | 81.2594 | -0.145789  | 0.06136    | 0.951071  | 0.996932  |
| gene538 | gene538 | SACOL0549 | gi 57650036 ref NC_002951.2 :553479-560527 | q1 | q2 | OK     | 187.92  | 128.546 | -0.547833  | 0.26957    | 0.787494  | 0.986986  |
| gene539 | gene539 | SACOL0550 | gi 57650036 ref NC_002951.2 :553479-560527 | q1 | q2 | OK     | 290.717 | 125.304 | -1.21419   | 0.1886     | 0.850409  | 0.996923  |
| gene54  | gene54  | SACOL0054 | gi 57650036 ref NC_002951.2 :65291-67344   | q1 | q2 | NOTEST | 0       | 0       | 0          | 0          | 1         | 1         |
| gene540 | gene540 | SACOL0551 | gi 57650036 ref NC_002951.2 :560544-560937 | q1 | q2 | OK     | 289.29  | 143.343 | -1.01304   | 2.0073     | 0.0447173 | 0.481552  |
| gene541 | gene541 | SACOL0552 | gi 57650036 ref NC_002951.2 :561041-561443 | q1 | q2 | OK     | 778.195 | 160.979 | -2.27325   | 3.48476    | 0.0004926 | 0.0332187 |
| gene542 | gene542 | SACOL0553 | gi 57650036 ref NC_002951.2 :561622-562918 | q1 | q2 | OK     | 30.4681 | 35.399  | 0.216411   | -0.44524   | 0.656147  | 0.986963  |
| gene543 | gene543 | hpt       | gi 57650036 ref NC_002951.2 :562922-563462 | q1 | q2 | OK     | 43.9593 | 49.5936 | 0.173987   | -0.35204   | 0.724805  | 0.986963  |
| gene544 | gene544 | SACOL0555 | gi 57650036 ref NC_002951.2 :563718-565812 | q1 | q2 | OK     | 316.785 | 336.903 | 0.0888265  | -0.08253   | 0.934229  | 0.996932  |
| gene545 | gene545 | hslO      | gi 57650036 ref NC_002951.2 :566040-566922 | q1 | q2 | OK     | 143.199 | 112.71  | -0.345407  | 0.59121    | 0.554382  | 0.981439  |
| gene546 | gene546 | cysK      | gi 57650036 ref NC_002951.2 :567100-568033 | q1 | q2 | OK     | 372.759 | 458.443 | 0.298497   | -0.3156    | 0.752308  | 0.986963  |



|         |         |             |                                            |    |    |        |         |         |           |          |           |           |
|---------|---------|-------------|--------------------------------------------|----|----|--------|---------|---------|-----------|----------|-----------|-----------|
| gene547 | gene547 | folP        | gi 57650036 ref NC_002951.2 :568248-569868 | q1 | q2 | OK     | 125.468 | 133.883 | 0.0936543 | -0.11917 | 0.905138  | 0.996932  |
| gene548 | gene548 | folB        | gi 57650036 ref NC_002951.2 :568248-569868 | q1 | q2 | OK     | 59.3338 | 48.3185 | -0.296278 | 0.13359  | 0.893728  | 0.996932  |
| gene549 | gene549 | folK        | gi 57650036 ref NC_002951.2 :568248-569868 | q1 | q2 | OK     | 104.414 | 69.1949 | -0.593575 | 0.42267  | 0.672534  | 0.986963  |
| gene55  | gene55  | SACOL0057   | gi 57650036 ref NC_002951.2 :68406-68499   | q1 | q2 | NOTEST | 0       | 0       | 0         | 0        | 1         | 1         |
| gene550 | gene550 | SACOL0561   | gi 57650036 ref NC_002951.2 :570261-570354 | q1 | q2 | NOTEST | 0       | 0       | 0         | 0        | 1         | 1         |
| gene551 | gene551 | lysS        | gi 57650036 ref NC_002951.2 :570406-571894 | q1 | q2 | OK     | 207.118 | 116.716 | -0.827446 | 1.00366  | 0.315543  | 0.892668  |
| gene552 | gene552 | rrfG        | gi 57650036 ref NC_002951.2 :572451-572566 | q1 | q2 | OK     | 812920  | 179376  | -2.18013  | 2.46493  | 0.0137041 | 0.270952  |
| gene554 | gene554 | rrsB        | gi 57650036 ref NC_002951.2 :572775-574330 | q1 | q2 | OK     | 10758.2 | 8641.38 | -0.316106 | 0.40121  | 0.688265  | 0.986963  |
| gene555 | gene555 | SACOL_tRNA- | gi 57650036 ref NC_002951.2 :574422-574499 | q1 | q2 | NOTEST | 0       | 0       | 0         | 0        | 1         | 1         |
| gene556 | gene556 | rrlB        | gi 57650036 ref NC_002951.2 :574666-577589 | q1 | q2 | OK     | 34394.4 | 23950.3 | -0.522132 | 1.68834  | 0.0913461 | 0.657221  |
| gene557 | gene557 | rrfB        | gi 57650036 ref NC_002951.2 :577661-577776 | q1 | q2 | OK     | 246505  | 144511  | -0.770444 | 1.06048  | 0.288927  | 0.888     |
| gene558 | gene558 | rrsC        | gi 57650036 ref NC_002951.2 :577987-579542 | q1 | q2 | OK     | 10914.2 | 9056.16 | -0.269236 | 0.34445  | 0.730511  | 0.986963  |
| gene559 | gene559 | rrlC        | gi 57650036 ref NC_002951.2 :579844-582767 | q1 | q2 | OK     | 33712.3 | 20557   | -0.713646 | 1.68857  | 0.0913016 | 0.657221  |
| gene56  | gene56  | SACOL0058   | gi 57650036 ref NC_002951.2 :68645-70391   | q1 | q2 | NOTEST | 0       | 0       | 0         | 0        | 1         | 1         |
| gene560 | gene560 | rrfC        | gi 57650036 ref NC_002951.2 :582839-582954 | q1 | q2 | OK     | 172128  | 105077  | -0.712036 | 1.10521  | 0.269071  | 0.875983  |
| gene561 | gene561 | SACOL0563   | gi 57650036 ref NC_002951.2 :583478-584861 | q1 | q2 | OK     | 29.427  | 34.3758 | 0.224255  | -0.46009 | 0.645455  | 0.986963  |
| gene562 | gene562 | SACOL0564   | gi 57650036 ref NC_002951.2 :584964-585852 | q1 | q2 | OK     | 478.115 | 71.438  | -2.74259  | 3.55138  | 0.0003832 | 0.0300704 |
| gene563 | gene563 | SACOL0565   | gi 57650036 ref NC_002951.2 :585855-586416 | q1 | q2 | OK     | 769.21  | 107.664 | -2.83684  | 3.79799  | 0.0001459 | 0.0174424 |
| gene564 | gene564 | nupC        | gi 57650036 ref NC_002951.2 :586623-587838 | q1 | q2 | OK     | 70.7405 | 47.016  | -0.589384 | 1.12865  | 0.259044  | 0.875983  |
| gene565 | gene565 | ctsR        | gi 57650036 ref NC_002951.2 :587995-588457 | q1 | q2 | OK     | 127.136 | 155.763 | 0.292979  | -0.59885 | 0.549271  | 0.979019  |
| gene566 | gene566 | SACOL0568   | gi 57650036 ref NC_002951.2 :588475-590039 | q1 | q2 | OK     | 293.801 | 263.926 | -0.154707 | 0.10388  | 0.917268  | 0.996932  |
| gene567 | gene567 | SACOL0569   | gi 57650036 ref NC_002951.2 :588475-590039 | q1 | q2 | OK     | 238.275 | 186.679 | -0.352066 | 0.30075  | 0.763608  | 0.986963  |
| gene568 | gene568 | clpC        | gi 57650036 ref NC_002951.2 :590052-592508 | q1 | q2 | OK     | 338.768 | 174.409 | -0.957821 | 0.91182  | 0.361866  | 0.925274  |
| gene569 | gene569 | radA        | gi 57650036 ref NC_002951.2 :592994-594359 | q1 | q2 | OK     | 99.9532 | 105.257 | 0.0745889 | -0.11278 | 0.910209  | 0.996932  |
| gene57  | gene57  | SACOL0059   | gi 57650036 ref NC_002951.2 :70484-70937   | q1 | q2 | OK     | 74.1389 | 41.0934 | -0.851326 | 1.69464  | 0.0901436 | 0.653356  |
| gene570 | gene570 | SACOL0573   | gi 57650036 ref NC_002951.2 :594383-595457 | q1 | q2 | OK     | 40.4992 | 32.1973 | -0.330955 | 0.68384  | 0.494076  | 0.964002  |
| gene571 | gene571 | gltX        | gi 57650036 ref NC_002951.2 :596013-597468 | q1 | q2 | OK     | 142.941 | 57.585  | -1.31166  | 1.93583  | 0.0528879 | 0.526991  |
| gene572 | gene572 | cysE        | gi 57650036 ref NC_002951.2 :597896-600319 | q1 | q2 | OK     | 196.335 | 194.345 | -0.014701 | 0.00809  | 0.993549  | 0.998143  |
| gene573 | gene573 | cysS        | gi 57650036 ref NC_002951.2 :597896-600319 | q1 | q2 | OK     | 175.952 | 143.939 | -0.28973  | 0.23409  | 0.814912  | 0.991377  |
| gene574 | gene574 | SACOL0577   | gi 57650036 ref NC_002951.2 :597896-600319 | q1 | q2 | OK     | 214.749 | 140.37  | -0.613415 | 0.22345  | 0.823182  | 0.992727  |
| gene575 | gene575 | SACOL0578   | gi 57650036 ref NC_002951.2 :600326-601597 | q1 | q2 | OK     | 174.058 | 103.816 | -0.745534 | 0.79062  | 0.429164  | 0.940178  |
| gene576 | gene576 | SACOL0579   | gi 57650036 ref NC_002951.2 :600326-601597 | q1 | q2 | OK     | 244.335 | 113.191 | -1.1101   | 1.04203  | 0.297397  | 0.892668  |
| gene577 | gene577 | SACOL0580   | gi 57650036 ref NC_002951.2 :601677-602247 | q1 | q2 | OK     | 108.738 | 64.873  | -0.745164 | 1.52771  | 0.126585  | 0.732386  |

|         |         |           |                                            |    |    |        |         |         |           |          |           |           |
|---------|---------|-----------|--------------------------------------------|----|----|--------|---------|---------|-----------|----------|-----------|-----------|
| gene578 | gene578 | secE      | gi 57650036 ref NC_002951.2 :602560-602743 | q1 | q2 | OK     | 204.605 | 116.543 | -0.81198  | 1.20162  | 0.22951   | 0.86139   |
| gene579 | gene579 | nusG      | gi 57650036 ref NC_002951.2 :602755-603304 | q1 | q2 | OK     | 309.249 | 123.465 | -1.32467  | 2.29322  | 0.0218354 | 0.342403  |
| gene58  | gene58  | SACOL0061 | gi 57650036 ref NC_002951.2 :71151-72167   | q1 | q2 | NOTEST | 0       | 0       | 0         | 0        | 1         | 1         |
| gene580 | gene580 | rplK      | gi 57650036 ref NC_002951.2 :603475-603907 | q1 | q2 | OK     | 443.873 | 133.662 | -1.73155  | 3.02779  | 0.0024635 | 0.0994497 |
| gene581 | gene581 | rplA      | gi 57650036 ref NC_002951.2 :604114-604807 | q1 | q2 | OK     | 326.406 | 103.658 | -1.65484  | 2.5481   | 0.010831  | 0.240679  |
| gene582 | gene582 | rplJ      | gi 57650036 ref NC_002951.2 :605078-605579 | q1 | q2 | OK     | 488.483 | 120.063 | -2.02451  | 3.20184  | 0.0013655 | 0.0637061 |
| gene583 | gene583 | rplL      | gi 57650036 ref NC_002951.2 :605621-605990 | q1 | q2 | OK     | 621.463 | 102.179 | -2.60457  | 4.45311  | 8.46E-06  | 0.0042505 |
| gene584 | gene584 | SACOL0587 | gi 57650036 ref NC_002951.2 :606164-606773 | q1 | q2 | OK     | 76.4893 | 40.6367 | -0.912476 | 1.86765  | 0.0618105 | 0.552335  |
| gene585 | gene585 | rpoB      | gi 57650036 ref NC_002951.2 :606987-610539 | q1 | q2 | OK     | 589.333 | 162.934 | -1.8548   | 1.75787  | 0.0787689 | 0.625914  |
| gene586 | gene586 | rpoC      | gi 57650036 ref NC_002951.2 :610675-614299 | q1 | q2 | OK     | 557.679 | 140.156 | -1.9924   | 1.90222  | 0.0571421 | 0.540443  |
| gene587 | gene587 | SACOL0590 | gi 57650036 ref NC_002951.2 :614435-614690 | q1 | q2 | OK     | 249.498 | 69.9485 | -1.83466  | 3.39953  | 0.000675  | 0.040697  |
| gene588 | gene588 | rpsL      | gi 57650036 ref NC_002951.2 :614787-615201 | q1 | q2 | OK     | 949.256 | 231.523 | -2.03564  | 2.8813   | 0.0039604 | 0.12949   |
| gene589 | gene589 | rpsG      | gi 57650036 ref NC_002951.2 :615266-615737 | q1 | q2 | OK     | 1082.9  | 221.078 | -2.29228  | 2.96982  | 0.0029798 | 0.105384  |
| gene59  | gene59  | SACOL0062 | gi 57650036 ref NC_002951.2 :71151-72167   | q1 | q2 | NOTEST | 0       | 0       | 0         | 0        | 1         | 1         |
| gene590 | gene590 | fusA      | gi 57650036 ref NC_002951.2 :615859-617941 | q1 | q2 | OK     | 1168.91 | 228.806 | -2.35297  | 2.28958  | 0.0220456 | 0.342403  |
| gene591 | gene591 | tuf       | gi 57650036 ref NC_002951.2 :618157-619342 | q1 | q2 | OK     | 1761.23 | 463.649 | -1.92548  | 1.83519  | 0.0664779 | 0.57234   |
| gene592 | gene592 | SACOL0595 | gi 57650036 ref NC_002951.2 :619623-620799 | q1 | q2 | OK     | 83.4697 | 102.65  | 0.29841   | -0.50586 | 0.612956  | 0.986963  |
| gene593 | gene593 | SACOL0596 | gi 57650036 ref NC_002951.2 :620969-622157 | q1 | q2 | OK     | 390.875 | 360.841 | -0.115344 | 0.11609  | 0.907578  | 0.996932  |
| gene594 | gene594 | SACOL0597 | gi 57650036 ref NC_002951.2 :622422-623301 | q1 | q2 | OK     | 456.98  | 1110.11 | 1.2805    | -1.24552 | 0.21294   | 0.831197  |
| gene595 | gene595 | SACOL0598 | gi 57650036 ref NC_002951.2 :623460-625098 | q1 | q2 | OK     | 60.126  | 62.5211 | 0.0563551 | -0.09701 | 0.92272   | 0.996932  |
| gene596 | gene596 | SACOL0599 | gi 57650036 ref NC_002951.2 :625311-626277 | q1 | q2 | OK     | 372.698 | 97.4155 | -1.93578  | 2.52986  | 0.0114109 | 0.247006  |
| gene597 | gene597 | ilvE      | gi 57650036 ref NC_002951.2 :626611-627834 | q1 | q2 | OK     | 213.796 | 244.293 | 0.192373  | -0.23265 | 0.816036  | 0.991377  |
| gene598 | gene598 | SACOL0601 | gi 57650036 ref NC_002951.2 :626611-627834 | q1 | q2 | OK     | 18.6841 | 70.9522 | 1.92504   | -0.1178  | 0.906226  | 0.996932  |
| gene599 | gene599 | SACOL0602 | gi 57650036 ref NC_002951.2 :627937-628621 | q1 | q2 | OK     | 54.5662 | 112.905 | 1.04903   | -2.11061 | 0.0348062 | 0.436145  |
| gene6   | gene6   | SACOL0007 | gi 57650036 ref NC_002951.2 :9781-10483    | q1 | q2 | OK     | 122.586 | 64.6822 | -0.922348 | 1.82336  | 0.0682496 | 0.578969  |
| gene60  | gene60  | SACOL0063 | gi 57650036 ref NC_002951.2 :72303-73371   | q1 | q2 | NOTEST | 0       | 0       | 0         | 0        | 1         | 1         |
| gene600 | gene600 | SACOL0603 | gi 57650036 ref NC_002951.2 :628736-630009 | q1 | q2 | OK     | 65.7829 | 59.7467 | -0.138855 | 0.23768  | 0.812127  | 0.991128  |
| gene601 | gene601 | SACOL0604 | gi 57650036 ref NC_002951.2 :628736-630009 | q1 | q2 | OK     | 21.1214 | 34.9359 | 0.726005  | -0.77242 | 0.439866  | 0.944827  |
| gene602 | gene602 | SACOL0605 | gi 57650036 ref NC_002951.2 :630075-630545 | q1 | q2 | OK     | 48.8101 | 55.6919 | 0.190289  | -0.38134 | 0.70295   | 0.986963  |
| gene603 | gene603 | SACOL0606 | gi 57650036 ref NC_002951.2 :630692-631562 | q1 | q2 | OK     | 34.6395 | 37.5203 | 0.115252  | -0.23854 | 0.81146   | 0.991128  |
| gene604 | gene604 | SACOL0607 | gi 57650036 ref NC_002951.2 :631582-632149 | q1 | q2 | OK     | 58.4116 | 54.3681 | -0.103493 | 0.21315  | 0.831212  | 0.994686  |
| gene605 | gene605 | sdrC      | gi 57650036 ref NC_002951.2 :632578-635422 | q1 | q2 | OK     | 69.965  | 53.5699 | -0.38521  | 0.51131  | 0.609135  | 0.986963  |
| gene606 | gene606 | sdrD      | gi 57650036 ref NC_002951.2 :635788-639934 | q1 | q2 | OK     | 132.658 | 62.2663 | -1.09119  | 1.12456  | 0.260773  | 0.875983  |

|         |         |           |                                            |    |    |        |         |         |           |          |           |          |
|---------|---------|-----------|--------------------------------------------|----|----|--------|---------|---------|-----------|----------|-----------|----------|
| gene607 | gene607 | sdrE      | gi 57650036 ref NC_002951.2 :640327-643828 | q1 | q2 | OK     | 61.4418 | 69.6664 | 0.181243  | -0.21539 | 0.829466  | 0.994686 |
| gene608 | gene608 | SACOL0611 | gi 57650036 ref NC_002951.2 :643946-645419 | q1 | q2 | OK     | 58.1602 | 35.2579 | -0.722084 | 1.38239  | 0.166853  | 0.814226 |
| gene609 | gene609 | SACOL0612 | gi 57650036 ref NC_002951.2 :645542-647033 | q1 | q2 | OK     | 129.516 | 97.6471 | -0.407478 | 0.56377  | 0.57291   | 0.985265 |
| gene61  | gene61  | SACOL0064 | gi 57650036 ref NC_002951.2 :73401-74736   | q1 | q2 | NOTEST | 0       | 0       | 0         | 0        | 1         | 1        |
| gene610 | gene610 | SACOL0613 | gi 57650036 ref NC_002951.2 :647314-648193 | q1 | q2 | OK     | 294.936 | 130.668 | -1.1745   | 1.63697  | 0.101637  | 0.686047 |
| gene611 | gene611 | SACOL0614 | gi 57650036 ref NC_002951.2 :648205-648871 | q1 | q2 | OK     | 163.115 | 82.0864 | -0.990675 | 1.88524  | 0.0593978 | 0.54633  |
| gene612 | gene612 | SACOL0615 | gi 57650036 ref NC_002951.2 :648884-649247 | q1 | q2 | OK     | 280.382 | 172.29  | -0.702553 | 1.41849  | 0.156049  | 0.797219 |
| gene613 | gene613 | nagB      | gi 57650036 ref NC_002951.2 :649522-650281 | q1 | q2 | OK     | 57.4268 | 48.1885 | -0.253034 | 0.5238   | 0.600417  | 0.986963 |
| gene614 | gene614 | SACOL0617 | gi 57650036 ref NC_002951.2 :650357-650990 | q1 | q2 | OK     | 199.896 | 333.905 | 0.740187  | -1.11997 | 0.262728  | 0.875983 |
| gene615 | gene615 | SACOL0618 | gi 57650036 ref NC_002951.2 :650991-651540 | q1 | q2 | OK     | 189.628 | 297.833 | 0.651329  | -1.11011 | 0.266951  | 0.875983 |
| gene616 | gene616 | SACOL0619 | gi 57650036 ref NC_002951.2 :651643-652300 | q1 | q2 | OK     | 39.3391 | 57.7143 | 0.552964  | -1.13797 | 0.255133  | 0.875983 |
| gene617 | gene617 | proP      | gi 57650036 ref NC_002951.2 :652801-654202 | q1 | q2 | OK     | 205.231 | 315.015 | 0.618174  | -0.65571 | 0.512012  | 0.971029 |
| gene618 | gene618 | SACOL0621 | gi 57650036 ref NC_002951.2 :654745-656122 | q1 | q2 | OK     | 24.2136 | 39.6422 | 0.711218  | -1.45202 | 0.146495  | 0.783746 |
| gene619 | gene619 | atoB      | gi 57650036 ref NC_002951.2 :656123-657603 | q1 | q2 | OK     | 56.9163 | 78.1903 | 0.458149  | -0.79703 | 0.425432  | 0.940178 |
| gene62  | gene62  | SACOL0065 | gi 57650036 ref NC_002951.2 :74754-75948   | q1 | q2 | NOTEST | 0       | 0       | 0         | 0        | 1         | 1        |
| gene620 | gene620 | SACOL0623 | gi 57650036 ref NC_002951.2 :656123-657603 | q1 | q2 | OK     | 31.723  | 49.0397 | 0.62842   | -0.37352 | 0.708764  | 0.986963 |
| gene621 | gene621 | SACOL0624 | gi 57650036 ref NC_002951.2 :657605-657875 | q1 | q2 | OK     | 50.3755 | 61.5336 | 0.288651  | -0.49224 | 0.622553  | 0.986963 |
| gene622 | gene622 | SACOL0625 | gi 57650036 ref NC_002951.2 :658075-658243 | q1 | q2 | OK     | 179.409 | 123.339 | -0.540617 | 0.70393  | 0.481479  | 0.961304 |
| gene623 | gene623 | thiD1     | gi 57650036 ref NC_002951.2 :658749-659580 | q1 | q2 | OK     | 152.837 | 111.784 | -0.451279 | 0.78278  | 0.433756  | 0.940247 |
| gene624 | gene624 | ung       | gi 57650036 ref NC_002951.2 :659763-660420 | q1 | q2 | OK     | 42.8939 | 55.205  | 0.364027  | -0.75103 | 0.452636  | 0.949479 |
| gene625 | gene625 | SACOL0628 | gi 57650036 ref NC_002951.2 :660420-660801 | q1 | q2 | OK     | 52.9483 | 62.0028 | 0.227747  | -0.443   | 0.657763  | 0.986963 |
| gene626 | gene626 | SACOL0629 | gi 57650036 ref NC_002951.2 :660933-661302 | q1 | q2 | OK     | 60.7576 | 70.2482 | 0.209397  | -0.41084 | 0.681193  | 0.986963 |
| gene627 | gene627 | SACOL0630 | gi 57650036 ref NC_002951.2 :661422-662907 | q1 | q2 | OK     | 157.691 | 388.935 | 1.30243   | -1.38042 | 0.167456  | 0.814226 |
| gene628 | gene628 | SACOL0631 | gi 57650036 ref NC_002951.2 :663048-663501 | q1 | q2 | OK     | 57.8447 | 73.381  | 0.343223  | -0.69756 | 0.485455  | 0.964002 |
| gene629 | gene629 | SACOL0632 | gi 57650036 ref NC_002951.2 :663513-664278 | q1 | q2 | OK     | 47.3413 | 57.9117 | 0.290755  | -0.60195 | 0.547207  | 0.979019 |
| gene63  | gene63  | SACOL0066 | gi 57650036 ref NC_002951.2 :76214-76316   | q1 | q2 | NOTEST | 0       | 0       | 0         | 0        | 1         | 1        |
| gene630 | gene630 | SACOL0633 | gi 57650036 ref NC_002951.2 :664826-665579 | q1 | q2 | OK     | 178.803 | 253.448 | 0.503318  | -0.75415 | 0.450762  | 0.948753 |
| gene631 | gene631 | eutD      | gi 57650036 ref NC_002951.2 :665746-666733 | q1 | q2 | OK     | 309.556 | 94.2145 | -1.71618  | 2.32763  | 0.0199316 | 0.32851  |
| gene632 | gene632 | SACOL0635 | gi 57650036 ref NC_002951.2 :666735-667572 | q1 | q2 | OK     | 211.357 | 81.0483 | -1.38283  | 2.252    | 0.0243224 | 0.359256 |
| gene633 | gene633 | mvk       | gi 57650036 ref NC_002951.2 :668158-669079 | q1 | q2 | OK     | 128.85  | 92.9638 | -0.470957 | 0.83038  | 0.406326  | 0.939607 |
| gene634 | gene634 | mvaD      | gi 57650036 ref NC_002951.2 :669083-670067 | q1 | q2 | OK     | 111.368 | 100.509 | -0.148017 | 0.259    | 0.795634  | 0.987561 |
| gene635 | gene635 | SACOL0638 | gi 57650036 ref NC_002951.2 :670079-671156 | q1 | q2 | OK     | 106.962 | 83.5504 | -0.356377 | 0.62151  | 0.534262  | 0.9754   |
| gene636 | gene636 | SACOL0639 | gi 57650036 ref NC_002951.2 :671332-671674 | q1 | q2 | OK     | 73.5944 | 43.1338 | -0.770775 | 1.4443   | 0.148655  | 0.788621 |

|         |         |           |                                            |    |    |        |         |         |           |          |           |          |
|---------|---------|-----------|--------------------------------------------|----|----|--------|---------|---------|-----------|----------|-----------|----------|
| gene637 | gene637 | SACOL0640 | gi 57650036 ref NC_002951.2 :671726-673476 | q1 | q2 | OK     | 40.3747 | 45.5786 | 0.174904  | -0.30922 | 0.757151  | 0.986963 |
| gene638 | gene638 | SACOL0641 | gi 57650036 ref NC_002951.2 :671726-673476 | q1 | q2 | OK     | 37.005  | 37.8828 | 0.0338245 | -0.02681 | 0.97861   | 0.998143 |
| gene639 | gene639 | SACOL0642 | gi 57650036 ref NC_002951.2 :673533-673635 | q1 | q2 | NOTEST | 0       | 0       | 0         | 0        | 1         | 1        |
| gene64  | gene64  | SACOL0067 | gi 57650036 ref NC_002951.2 :76614-77547   | q1 | q2 | OK     | 112.6   | 72.9701 | -0.625825 | 1.1566   | 0.247435  | 0.869586 |
| gene640 | gene640 | SACOL0643 | gi 57650036 ref NC_002951.2 :674100-675510 | q1 | q2 | OK     | 63.1629 | 55.4939 | -0.186748 | 0.34362  | 0.731131  | 0.986963 |
| gene641 | gene641 | SACOL0644 | gi 57650036 ref NC_002951.2 :675513-676140 | q1 | q2 | OK     | 19.6961 | 23.811  | 0.273719  | -0.51939 | 0.603492  | 0.986963 |
| gene642 | gene642 | SACOL0645 | gi 57650036 ref NC_002951.2 :676265-676907 | q1 | q2 | OK     | 19.0711 | 31.0951 | 0.705297  | -1.36161 | 0.173322  | 0.819812 |
| gene643 | gene643 | SACOL0646 | gi 57650036 ref NC_002951.2 :676994-677612 | q1 | q2 | OK     | 23.9548 | 35.2397 | 0.556889  | -1.093   | 0.274392  | 0.879877 |
| gene644 | gene644 | SACOL0647 | gi 57650036 ref NC_002951.2 :677686-678316 | q1 | q2 | OK     | 27.3448 | 44.9375 | 0.716652  | -1.4364  | 0.150888  | 0.790982 |
| gene645 | gene645 | SACOL0648 | gi 57650036 ref NC_002951.2 :678511-679132 | q1 | q2 | OK     | 14.0727 | 20.5164 | 0.543874  | -0.99009 | 0.322129  | 0.89482  |
| gene646 | gene646 | SACOL0649 | gi 57650036 ref NC_002951.2 :679262-679904 | q1 | q2 | OK     | 32.0297 | 41.4602 | 0.372313  | -0.75268 | 0.451644  | 0.949479 |
| gene647 | gene647 | SACOL0650 | gi 57650036 ref NC_002951.2 :679950-680580 | q1 | q2 | OK     | 21.5748 | 33.7031 | 0.643534  | -1.25503 | 0.209468  | 0.830641 |
| gene648 | gene648 | SACOL0651 | gi 57650036 ref NC_002951.2 :681032-681662 | q1 | q2 | OK     | 15.0522 | 28.3816 | 0.914981  | -1.71584 | 0.0861921 | 0.638501 |
| gene649 | gene649 | SACOL0652 | gi 57650036 ref NC_002951.2 :681776-682427 | q1 | q2 | OK     | 20.1545 | 30.78   | 0.610891  | -1.18667 | 0.235358  | 0.863102 |
| gene65  | gene65  | SACOL0068 | gi 57650036 ref NC_002951.2 :77909-78113   | q1 | q2 | OK     | 8.89853 | 13.3117 | 0.581053  | -0.42175 | 0.673211  | 0.986963 |
| gene650 | gene650 | SACOL0653 | gi 57650036 ref NC_002951.2 :682463-683099 | q1 | q2 | OK     | 30.9556 | 44.051  | 0.508974  | -1.02803 | 0.303935  | 0.892668 |
| gene651 | gene651 | SACOL0654 | gi 57650036 ref NC_002951.2 :683333-683960 | q1 | q2 | OK     | 21.4637 | 28.8708 | 0.427715  | -0.82643 | 0.408558  | 0.939607 |
| gene652 | gene652 | SACOL0655 | gi 57650036 ref NC_002951.2 :684229-685168 | q1 | q2 | OK     | 261.736 | 226.616 | -0.207861 | 0.26206  | 0.793278  | 0.987448 |
| gene653 | gene653 | SACOL0656 | gi 57650036 ref NC_002951.2 :685378-685915 | q1 | q2 | OK     | 615.736 | 438.551 | -0.489565 | 0.61408  | 0.539165  | 0.978583 |
| gene654 | gene654 | SACOL0657 | gi 57650036 ref NC_002951.2 :686083-686560 | q1 | q2 | OK     | 43.944  | 62.4552 | 0.507156  | -1.0177  | 0.30882   | 0.892668 |
| gene655 | gene655 | SACOL0658 | gi 57650036 ref NC_002951.2 :686599-687895 | q1 | q2 | OK     | 97.0465 | 82.9145 | -0.227052 | 0.3727   | 0.709375  | 0.986963 |
| gene656 | gene656 | SACOL0659 | gi 57650036 ref NC_002951.2 :687922-688444 | q1 | q2 | OK     | 147.454 | 121.597 | -0.278163 | 0.55974  | 0.575656  | 0.985265 |
| gene657 | gene657 | adhP      | gi 57650036 ref NC_002951.2 :688942-689953 | q1 | q2 | OK     | 91.8668 | 58.7546 | -0.644842 | 1.22571  | 0.220307  | 0.848452 |
| gene658 | gene658 | SACOL0661 | gi 57650036 ref NC_002951.2 :690027-690135 | q1 | q2 | NOTEST | 0       | 0       | 0         | 0        | 1         | 1        |
| gene659 | gene659 | SACOL0662 | gi 57650036 ref NC_002951.2 :690215-692302 | q1 | q2 | OK     | 149.073 | 103.615 | -0.52479  | 0.35621  | 0.721681  | 0.986963 |
| gene66  | gene66  | SACOL0069 | gi 57650036 ref NC_002951.2 :78161-78458   | q1 | q2 | OK     | 11.7554 | 3.46093 | -1.76409  | 1.5959   | 0.110512  | 0.717042 |
| gene660 | gene660 | argS      | gi 57650036 ref NC_002951.2 :690215-692302 | q1 | q2 | OK     | 79.8341 | 65.351  | -0.288796 | 0.36061  | 0.718389  | 0.986963 |
| gene661 | gene661 | SACOL0664 | gi 57650036 ref NC_002951.2 :692690-693326 | q1 | q2 | OK     | 26.0027 | 41.7172 | 0.681979  | -1.36103 | 0.173505  | 0.819812 |
| gene662 | gene662 | SACOL0665 | gi 57650036 ref NC_002951.2 :693704-694592 | q1 | q2 | OK     | 62.8802 | 48.7503 | -0.367194 | 0.75047  | 0.452974  | 0.949479 |
| gene663 | gene663 | SACOL0666 | gi 57650036 ref NC_002951.2 :694739-695690 | q1 | q2 | OK     | 52.1942 | 47.5071 | -0.135747 | 0.27848  | 0.780646  | 0.986963 |
| gene664 | gene664 | SACOL0667 | gi 57650036 ref NC_002951.2 :695744-697248 | q1 | q2 | OK     | 53.518  | 35.688  | -0.584588 | 0.62658  | 0.530932  | 0.97289  |
| gene665 | gene665 | SACOL0668 | gi 57650036 ref NC_002951.2 :695744-697248 | q1 | q2 | OK     | 85.9939 | 65.2342 | -0.398605 | 0.59789  | 0.549913  | 0.979019 |
| gene666 | gene666 | SACOL0669 | gi 57650036 ref NC_002951.2 :697383-697890 | q1 | q2 | OK     | 815.531 | 174.52  | -2.22435  | 3.01054  | 0.0026079 | 0.100744 |

|         |         |           |                                            |    |    |        |         |         |            |           |           |          |
|---------|---------|-----------|--------------------------------------------|----|----|--------|---------|---------|------------|-----------|-----------|----------|
| gene667 | gene667 | SACOL0670 | gi 57650036 ref NC_002951.2 :698051-698768 | q1 | q2 | OK     | 200.684 | 77.7168 | -1.36863   | 2.42092   | 0.0154811 | 0.288253 |
| gene668 | gene668 | SACOL0671 | gi 57650036 ref NC_002951.2 :698936-699725 | q1 | q2 | OK     | 486.227 | 623.156 | 0.357963   | -0.37106  | 0.710596  | 0.986963 |
| gene669 | gene669 | sarA      | gi 57650036 ref NC_002951.2 :699975-700350 | q1 | q2 | OK     | 807.831 | 1896.73 | 1.23139    | -1.40154  | 0.161053  | 0.802655 |
| gene67  | gene67  | SACOL0070 | gi 57650036 ref NC_002951.2 :78529-80204   | q1 | q2 | NOTEST | 0       | 0       | 0          | 0         | 1         | 1        |
| gene670 | gene670 | SACOL0673 | gi 57650036 ref NC_002951.2 :700497-700617 | q1 | q2 | OK     | 76.5944 | 0       | -1.79769e+ | -1.79769e | 0.201324  | 0.819847 |
| gene671 | gene671 | SACOL0675 | gi 57650036 ref NC_002951.2 :701297-702191 | q1 | q2 | OK     | 58.3725 | 68.9762 | 0.240811   | -0.48619  | 0.626831  | 0.986963 |
| gene672 | gene672 | SACOL0676 | gi 57650036 ref NC_002951.2 :702421-702646 | q1 | q2 | OK     | 16.0875 | 22.7209 | 0.498075   | -0.53163  | 0.594983  | 0.985953 |
| gene673 | gene673 | SACOL0677 | gi 57650036 ref NC_002951.2 :702662-702866 | q1 | q2 | OK     | 26.6956 | 13.3117 | -1.00391   | 0.87469   | 0.381742  | 0.936088 |
| gene674 | gene674 | SACOL0678 | gi 57650036 ref NC_002951.2 :703024-703585 | q1 | q2 | OK     | 41.0127 | 132.483 | 1.69166    | -3.39079  | 0.0006969 | 0.040697 |
| gene675 | gene675 | SACOL0679 | gi 57650036 ref NC_002951.2 :703603-708245 | q1 | q2 | OK     | 44.4504 | 91.6689 | 1.04424    | -0.81207  | 0.416752  | 0.939652 |
| gene676 | gene676 | SACOL0680 | gi 57650036 ref NC_002951.2 :703603-708245 | q1 | q2 | OK     | 74.282  | 129.892 | 0.806229   | -0.25781  | 0.796552  | 0.988213 |
| gene677 | gene677 | SACOL0681 | gi 57650036 ref NC_002951.2 :703603-708245 | q1 | q2 | OK     | 53.2677 | 119.69  | 1.16796    | -0.27994  | 0.779522  | 0.986963 |
| gene678 | gene678 | SACOL0682 | gi 57650036 ref NC_002951.2 :703603-708245 | q1 | q2 | OK     | 58.763  | 101.427 | 0.787468   | -0.51417  | 0.607136  | 0.986963 |
| gene679 | gene679 | SACOL0684 | gi 57650036 ref NC_002951.2 :708245-709439 | q1 | q2 | OK     | 27.6305 | 36.5483 | 0.403543   | -0.39921  | 0.689737  | 0.986963 |
| gene68  | gene68  | SACOL0071 | gi 57650036 ref NC_002951.2 :78529-80204   | q1 | q2 | NOTEST | 0       | 0       | 0          | 0         | 1         | 1        |
| gene680 | gene680 | SACOL0685 | gi 57650036 ref NC_002951.2 :708245-709439 | q1 | q2 | OK     | 94.1551 | 100.899 | 0.0998073  | -0.11079  | 0.91178   | 0.996932 |
| gene681 | gene681 | SACOL0686 | gi 57650036 ref NC_002951.2 :708245-709439 | q1 | q2 | OK     | 61.5033 | 87.0147 | 0.500596   | -0.69387  | 0.487765  | 0.964002 |
| gene682 | gene682 | SACOL0687 | gi 57650036 ref NC_002951.2 :709778-711821 | q1 | q2 | OK     | 98.3317 | 115.237 | 0.22888    | -0.28121  | 0.778548  | 0.986963 |
| gene683 | gene683 | SACOL0688 | gi 57650036 ref NC_002951.2 :712980-715480 | q1 | q2 | OK     | 127.326 | 325.967 | 1.3562     | -0.88114  | 0.378242  | 0.932987 |
| gene684 | gene684 | SACOL0689 | gi 57650036 ref NC_002951.2 :712980-715480 | q1 | q2 | OK     | 94.5135 | 274.675 | 1.53913    | -0.84107  | 0.400311  | 0.939607 |
| gene685 | gene685 | SACOL0690 | gi 57650036 ref NC_002951.2 :712980-715480 | q1 | q2 | OK     | 92.9132 | 430.207 | 2.21108    | -1.27472  | 0.202408  | 0.819847 |
| gene686 | gene686 | sirR      | gi 57650036 ref NC_002951.2 :715601-716246 | q1 | q2 | OK     | 179.79  | 195.086 | 0.117792   | -0.20428  | 0.838133  | 0.996923 |
| gene687 | gene687 | SACOL0692 | gi 57650036 ref NC_002951.2 :716325-717078 | q1 | q2 | OK     | 38.216  | 31.5361 | -0.277172  | 0.56739   | 0.570447  | 0.985265 |
| gene688 | gene688 | tagA      | gi 57650036 ref NC_002951.2 :717313-718078 | q1 | q2 | OK     | 44.625  | 60.637  | 0.442345   | -0.91467  | 0.360367  | 0.923053 |
| gene689 | gene689 | SACOL0694 | gi 57650036 ref NC_002951.2 :718138-718933 | q1 | q2 | OK     | 217.785 | 112.525 | -0.952662  | 1.53687   | 0.124326  | 0.732386 |
| gene69  | gene69  | SACOL0072 | gi 57650036 ref NC_002951.2 :80405-81266   | q1 | q2 | NOTEST | 0       | 0       | 0          | 0         | 1         | 1        |
| gene690 | gene690 | SACOL0695 | gi 57650036 ref NC_002951.2 :719279-720092 | q1 | q2 | OK     | 102.885 | 78.4693 | -0.390834  | 0.75933   | 0.447657  | 0.948742 |
| gene691 | gene691 | tagB      | gi 57650036 ref NC_002951.2 :720190-722352 | q1 | q2 | OK     | 95.7109 | 65.4557 | -0.548164  | 0.52059   | 0.602652  | 0.986963 |
| gene692 | gene692 | tagX      | gi 57650036 ref NC_002951.2 :720190-722352 | q1 | q2 | OK     | 111.996 | 68.5821 | -0.707542  | 0.69459   | 0.487315  | 0.964002 |
| gene693 | gene693 | tagD      | gi 57650036 ref NC_002951.2 :722414-722813 | q1 | q2 | OK     | 153.445 | 87.4122 | -0.811816  | 1.66587   | 0.09574   | 0.664499 |
| gene694 | gene694 | pbp4      | gi 57650036 ref NC_002951.2 :722929-724225 | q1 | q2 | OK     | 68.3224 | 72.3423 | 0.0824812  | -0.14858  | 0.881882  | 0.996932 |
| gene695 | gene695 | abcA      | gi 57650036 ref NC_002951.2 :724645-726373 | q1 | q2 | OK     | 255.76  | 103.211 | -1.3092    | 1.48091   | 0.13863   | 0.763035 |
| gene696 | gene696 | SACOL0701 | gi 57650036 ref NC_002951.2 :726731-727961 | q1 | q2 | OK     | 101.668 | 68.3144 | -0.573605  | 0.98122   | 0.326486  | 0.900129 |

|         |         |           |                                            |    |    |        |         |         |           |          |           |          |
|---------|---------|-----------|--------------------------------------------|----|----|--------|---------|---------|-----------|----------|-----------|----------|
| gene697 | gene697 | SACOL0702 | gi 57650036 ref NC_002951.2 :728215-728308 | q1 | q2 | NOTEST | 0       | 0       | 0         | 0        | 1         | 1        |
| gene698 | gene698 | SACOL0703 | gi 57650036 ref NC_002951.2 :728485-729319 | q1 | q2 | OK     | 136.672 | 85.0764 | -0.683886 | 1.24823  | 0.211948  | 0.831197 |
| gene699 | gene699 | SACOL0704 | gi 57650036 ref NC_002951.2 :729600-730398 | q1 | q2 | OK     | 180.897 | 84.8955 | -1.09141  | 1.8922   | 0.0584638 | 0.540443 |
| gene7   | gene7   | hutH      | gi 57650036 ref NC_002951.2 :10919-12434   | q1 | q2 | OK     | 71.8915 | 46.2566 | -0.636163 | 1.13451  | 0.256581  | 0.875983 |
| gene70  | gene70  | SACOL0073 | gi 57650036 ref NC_002951.2 :81620-82154   | q1 | q2 | NOTEST | 0       | 0       | 0         | 0        | 1         | 1        |
| gene700 | gene700 | SACOL0705 | gi 57650036 ref NC_002951.2 :730433-732451 | q1 | q2 | OK     | 92.5263 | 73.0142 | -0.341687 | 0.33614  | 0.736764  | 0.986963 |
| gene701 | gene701 | SACOL0706 | gi 57650036 ref NC_002951.2 :730433-732451 | q1 | q2 | OK     | 105.669 | 68.3183 | -0.629215 | 0.63885  | 0.522924  | 0.972546 |
| gene702 | gene702 | SACOL0707 | gi 57650036 ref NC_002951.2 :732687-733653 | q1 | q2 | OK     | 137.676 | 92.013  | -0.581373 | 0.98945  | 0.322445  | 0.89482  |
| gene703 | gene703 | SACOL0708 | gi 57650036 ref NC_002951.2 :733694-734634 | q1 | q2 | OK     | 152.357 | 120.307 | -0.340733 | 0.54663  | 0.58463   | 0.985265 |
| gene704 | gene704 | SACOL0709 | gi 57650036 ref NC_002951.2 :733694-734634 | q1 | q2 | OK     | 104.994 | 79.1801 | -0.407097 | 0.3629   | 0.716683  | 0.986963 |
| gene705 | gene705 | SACOL0710 | gi 57650036 ref NC_002951.2 :734749-735247 | q1 | q2 | OK     | 474.305 | 514.179 | 0.116454  | -0.15653 | 0.875615  | 0.996932 |
| gene706 | gene706 | SACOL0711 | gi 57650036 ref NC_002951.2 :735702-736770 | q1 | q2 | OK     | 131.183 | 121.595 | -0.109491 | 0.1714   | 0.863912  | 0.996923 |
| gene707 | gene707 | SACOL0712 | gi 57650036 ref NC_002951.2 :736920-737964 | q1 | q2 | OK     | 26.4278 | 42.6848 | 0.691663  | -1.42592 | 0.153891  | 0.793468 |
| gene708 | gene708 | SACOL0713 | gi 57650036 ref NC_002951.2 :738292-738721 | q1 | q2 | OK     | 91.2239 | 41.8754 | -1.12331  | 2.23003  | 0.0257452 | 0.369406 |
| gene709 | gene709 | SACOL0714 | gi 57650036 ref NC_002951.2 :738929-739436 | q1 | q2 | OK     | 212.866 | 236.907 | 0.154375  | -0.28299 | 0.777184  | 0.986963 |
| gene71  | gene71  | SACOL0074 | gi 57650036 ref NC_002951.2 :82253-82988   | q1 | q2 | NOTEST | 0       | 0       | 0         | 0        | 1         | 1        |
| gene710 | gene710 | SACOL0715 | gi 57650036 ref NC_002951.2 :739548-740472 | q1 | q2 | OK     | 106.744 | 77.4239 | -0.463309 | 0.86367  | 0.387769  | 0.939006 |
| gene711 | gene711 | SACOL0716 | gi 57650036 ref NC_002951.2 :740478-742195 | q1 | q2 | OK     | 51.198  | 46.6921 | -0.132907 | 0.11942  | 0.904942  | 0.996932 |
| gene712 | gene712 | SACOL0717 | gi 57650036 ref NC_002951.2 :740478-742195 | q1 | q2 | OK     | 88.5728 | 61.7857 | -0.519591 | 0.75617  | 0.449546  | 0.948742 |
| gene713 | gene713 | SACOL0718 | gi 57650036 ref NC_002951.2 :742338-744979 | q1 | q2 | OK     | 119.147 | 117.108 | -0.024907 | 0.0143   | 0.988589  | 0.998143 |
| gene714 | gene714 | SACOL0720 | gi 57650036 ref NC_002951.2 :742338-744979 | q1 | q2 | OK     | 95.8568 | 127.346 | 0.409798  | -0.39225 | 0.694871  | 0.986963 |
| gene715 | gene715 | SACOL0721 | gi 57650036 ref NC_002951.2 :745703-746321 | q1 | q2 | OK     | 151.198 | 74.7325 | -1.01664  | 2.00045  | 0.0454512 | 0.481552 |
| gene716 | gene716 | SACOL0722 | gi 57650036 ref NC_002951.2 :746336-747344 | q1 | q2 | OK     | 140.291 | 65.0573 | -1.10864  | 1.90099  | 0.0573035 | 0.540443 |
| gene717 | gene717 | SACOL0723 | gi 57650036 ref NC_002951.2 :747931-748729 | q1 | q2 | OK     | 372.457 | 958.997 | 1.36445   | -1.404   | 0.160319  | 0.802655 |
| gene718 | gene718 | SACOL0724 | gi 57650036 ref NC_002951.2 :749089-749734 | q1 | q2 | OK     | 113.219 | 62.9309 | -0.847281 | 1.71263  | 0.0867805 | 0.638501 |
| gene719 | gene719 | SACOL0725 | gi 57650036 ref NC_002951.2 :750430-752581 | q1 | q2 | OK     | 35.8127 | 53.0799 | 0.567695  | -0.97959 | 0.327287  | 0.900129 |
| gene72  | gene72  | SACOL0075 | gi 57650036 ref NC_002951.2 :83421-84024   | q1 | q2 | OK     | 38.3739 | 39.9582 | 0.0583644 | -0.11794 | 0.906116  | 0.996932 |
| gene720 | gene720 | sarX      | gi 57650036 ref NC_002951.2 :752660-753086 | q1 | q2 | OK     | 22.0595 | 43.4785 | 0.978903  | -1.77988 | 0.0750962 | 0.614566 |
| gene721 | gene721 | SACOL0727 | gi 57650036 ref NC_002951.2 :753275-754465 | q1 | q2 | OK     | 249.219 | 140.583 | -0.825992 | 1.01089  | 0.312068  | 0.892668 |
| gene722 | gene722 | SACOL0728 | gi 57650036 ref NC_002951.2 :753275-754465 | q1 | q2 | OK     | 152.853 | 89.881  | -0.766053 | 0.54985  | 0.582423  | 0.985265 |
| gene723 | gene723 | SACOL0730 | gi 57650036 ref NC_002951.2 :754817-755462 | q1 | q2 | OK     | 189.752 | 128.436 | -0.563061 | 1.02319  | 0.306219  | 0.892668 |
| gene724 | gene724 | SACOL0731 | gi 57650036 ref NC_002951.2 :755577-756444 | q1 | q2 | OK     | 164.831 | 101.459 | -0.70009  | 1.18206  | 0.237183  | 0.863102 |
| gene725 | gene725 | SACOL0733 | gi 57650036 ref NC_002951.2 :756782-758488 | q1 | q2 | OK     | 87.3717 | 52.0939 | -0.746053 | 1.00032  | 0.317155  | 0.892668 |

|         |         |           |                                            |    |    |    |         |         |           |          |          |           |
|---------|---------|-----------|--------------------------------------------|----|----|----|---------|---------|-----------|----------|----------|-----------|
| gene726 | gene726 | SACOL0734 | gi 57650036 ref NC_002951.2 :756782-758488 | q1 | q2 | OK | 113.509 | 89.3654 | -0.34502  | 0.30539  | 0.760072 | 0.986963  |
| gene727 | gene727 | SACOL0735 | gi 57650036 ref NC_002951.2 :758586-759276 | q1 | q2 | OK | 70.141  | 53.1782 | -0.399422 | 0.82526  | 0.409224 | 0.939607  |
| gene728 | gene728 | SACOL0736 | gi 57650036 ref NC_002951.2 :759402-759846 | q1 | q2 | OK | 22.7178 | 24.7966 | 0.12632   | -0.22358 | 0.823086 | 0.992727  |
| gene729 | gene729 | SACOL0737 | gi 57650036 ref NC_002951.2 :759912-760308 | q1 | q2 | OK | 131.007 | 172.322 | 0.395464  | -0.81698 | 0.41394  | 0.939652  |
| gene73  | gene73  | SACOL0076 | gi 57650036 ref NC_002951.2 :84290-87443   | q1 | q2 | OK | 29.5583 | 33.883  | 0.196996  | -0.33218 | 0.739755 | 0.986963  |
| gene730 | gene730 | SACOL0738 | gi 57650036 ref NC_002951.2 :760445-760745 | q1 | q2 | OK | 128.118 | 164.175 | 0.357754  | -0.72713 | 0.467148 | 0.954346  |
| gene731 | gene731 | SACOL0739 | gi 57650036 ref NC_002951.2 :760824-761367 | q1 | q2 | OK | 42.6786 | 66.0637 | 0.630344  | -1.28517 | 0.198731 | 0.819847  |
| gene732 | gene732 | SACOL0740 | gi 57650036 ref NC_002951.2 :761462-762029 | q1 | q2 | OK | 111.302 | 83.6168 | -0.41261  | 0.84522  | 0.397987 | 0.939607  |
| gene733 | gene733 | SACOL0741 | gi 57650036 ref NC_002951.2 :762030-762489 | q1 | q2 | OK | 84.1725 | 49.7728 | -0.75799  | 1.53392  | 0.12505  | 0.732386  |
| gene734 | gene734 | SACOL0742 | gi 57650036 ref NC_002951.2 :762491-763175 | q1 | q2 | OK | 514.001 | 541.312 | 0.0746911 | -0.08268 | 0.934105 | 0.996932  |
| gene735 | gene735 | uppP      | gi 57650036 ref NC_002951.2 :763346-764222 | q1 | q2 | OK | 55.6068 | 51.1201 | -0.121373 | 0.24956  | 0.802927 | 0.989625  |
| gene736 | gene736 | SACOL0744 | gi 57650036 ref NC_002951.2 :764440-767742 | q1 | q2 | OK | 69.4601 | 87.6912 | 0.336247  | -0.27687 | 0.781882 | 0.986963  |
| gene737 | gene737 | SACOL0745 | gi 57650036 ref NC_002951.2 :764440-767742 | q1 | q2 | OK | 74.4348 | 78.9253 | 0.0845097 | -0.0698  | 0.944351 | 0.996932  |
| gene738 | gene738 | norR      | gi 57650036 ref NC_002951.2 :767868-768312 | q1 | q2 | OK | 458.984 | 280.354 | -0.711196 | 1.1648   | 0.244099 | 0.869586  |
| gene739 | gene739 | SACOL0747 | gi 57650036 ref NC_002951.2 :768538-769465 | q1 | q2 | OK | 34.627  | 31.8042 | -0.122682 | 0.25385  | 0.79961  | 0.989562  |
| gene74  | gene74  | SACOL0077 | gi 57650036 ref NC_002951.2 :87499-87982   | q1 | q2 | OK | 44.2088 | 50.6393 | 0.195922  | -0.39048 | 0.69618  | 0.986963  |
| gene740 | gene740 | SACOL0748 | gi 57650036 ref NC_002951.2 :769567-770476 | q1 | q2 | OK | 60.4702 | 80.4795 | 0.412397  | -0.8178  | 0.413471 | 0.939652  |
| gene741 | gene741 | SACOL0749 | gi 57650036 ref NC_002951.2 :770510-770798 | q1 | q2 | OK | 76.8297 | 112.561 | 0.550967  | -1.05418 | 0.291801 | 0.891156  |
| gene742 | gene742 | SACOL0750 | gi 57650036 ref NC_002951.2 :771080-772634 | q1 | q2 | OK | 69.6998 | 73.3909 | 0.0744463 | -0.12342 | 0.901771 | 0.996932  |
| gene743 | gene743 | SACOL0751 | gi 57650036 ref NC_002951.2 :772719-774093 | q1 | q2 | OK | 130.388 | 75.7097 | -0.784266 | 1.17781  | 0.238871 | 0.863492  |
| gene744 | gene744 | SACOL0752 | gi 57650036 ref NC_002951.2 :774528-775146 | q1 | q2 | OK | 73.4098 | 88.0993 | 0.263157  | -0.54236 | 0.587572 | 0.985265  |
| gene745 | gene745 | SACOL0753 | gi 57650036 ref NC_002951.2 :775331-775754 | q1 | q2 | OK | 69.694  | 60.529  | -0.203408 | 0.40922  | 0.682382 | 0.986963  |
| gene746 | gene746 | norA      | gi 57650036 ref NC_002951.2 :775962-777129 | q1 | q2 | OK | 74.7229 | 110.038 | 0.558375  | -0.94942 | 0.342409 | 0.905587  |
| gene747 | gene747 | SACOL0755 | gi 57650036 ref NC_002951.2 :777421-777874 | q1 | q2 | OK | 102.654 | 797.407 | 2.95753   | -4.32353 | 1.54E-05 | 0.0055082 |
| gene748 | gene748 | SACOL0756 | gi 57650036 ref NC_002951.2 :778047-778530 | q1 | q2 | OK | 49.3665 | 46.6762 | -0.080846 | 0.16137  | 0.871805 | 0.996923  |
| gene749 | gene749 | SACOL0757 | gi 57650036 ref NC_002951.2 :778779-780461 | q1 | q2 | OK | 25.0288 | 43.6041 | 0.800874  | -0.64343 | 0.519945 | 0.971416  |
| gene75  | gene75  | plc       | gi 57650036 ref NC_002951.2 :88186-89173   | q1 | q2 | OK | 32.6518 | 41.2702 | 0.337939  | -0.69968 | 0.484125 | 0.963899  |
| gene750 | gene750 | fruK      | gi 57650036 ref NC_002951.2 :778779-780461 | q1 | q2 | OK | 84.2602 | 102.995 | 0.289645  | -0.43767 | 0.661627 | 0.986963  |
| gene751 | gene751 | SACOL0759 | gi 57650036 ref NC_002951.2 :780466-782424 | q1 | q2 | OK | 39.0305 | 48.9425 | 0.326487  | -0.58784 | 0.55664  | 0.981874  |
| gene752 | gene752 | nagA      | gi 57650036 ref NC_002951.2 :782731-783913 | q1 | q2 | OK | 53.6428 | 60.4792 | 0.173053  | -0.33745 | 0.735782 | 0.986963  |
| gene753 | gene753 | SACOL0762 | gi 57650036 ref NC_002951.2 :784133-785483 | q1 | q2 | OK | 113.068 | 170.167 | 0.589758  | -0.78249 | 0.433926 | 0.940247  |
| gene754 | gene754 | SACOL0763 | gi 57650036 ref NC_002951.2 :785704-786544 | q1 | q2 | OK | 149.58  | 198.577 | 0.408783  | -0.63304 | 0.526706 | 0.97289   |
| gene755 | gene755 | SACOL0764 | gi 57650036 ref NC_002951.2 :786675-787659 | q1 | q2 | OK | 168.4   | 193.26  | 0.198654  | -0.2772  | 0.781625 | 0.986963  |

|         |         |             |                                            |    |    |        |         |         |           |          |           |           |
|---------|---------|-------------|--------------------------------------------|----|----|--------|---------|---------|-----------|----------|-----------|-----------|
| gene756 | gene756 | saeS        | gi 57650036 ref NC_002951.2 :787730-789920 | q1 | q2 | OK     | 271.391 | 523.2   | 0.946989  | -0.68935 | 0.490603  | 0.964002  |
| gene757 | gene757 | saeR        | gi 57650036 ref NC_002951.2 :787730-789920 | q1 | q2 | OK     | 224.591 | 415.632 | 0.888007  | -0.44291 | 0.657832  | 0.986963  |
| gene758 | gene758 | SACOL0767   | gi 57650036 ref NC_002951.2 :787730-789920 | q1 | q2 | OK     | 155.128 | 412.182 | 1.40982   | -0.49008 | 0.624075  | 0.986963  |
| gene759 | gene759 | SACOL0768   | gi 57650036 ref NC_002951.2 :790261-790702 | q1 | q2 | OK     | 114.843 | 381.388 | 1.7316    | -3.17037 | 0.0015225 | 0.0695075 |
| gene76  | gene76  | SACOL0079   | gi 57650036 ref NC_002951.2 :89393-90164   | q1 | q2 | OK     | 3.26548 | 1.34873 | -1.27569  | 1.43441  | 0.151454  | 0.792296  |
| gene760 | gene760 | SACOL0769   | gi 57650036 ref NC_002951.2 :790981-791566 | q1 | q2 | OK     | 80.6267 | 81.1907 | 0.0100576 | -0.0208  | 0.983402  | 0.998143  |
| gene761 | gene761 | SACOL0770   | gi 57650036 ref NC_002951.2 :791664-792378 | q1 | q2 | OK     | 104.396 | 95.081  | -0.134832 | 0.26606  | 0.790191  | 0.986986  |
| gene762 | gene762 | SACOL0771   | gi 57650036 ref NC_002951.2 :792381-792801 | q1 | q2 | OK     | 60.8475 | 42.9057 | -0.50403  | 0.98526  | 0.324497  | 0.899351  |
| gene763 | gene763 | SACOL0772   | gi 57650036 ref NC_002951.2 :792802-793471 | q1 | q2 | OK     | 46.0272 | 45.4129 | -0.019383 | 0.03997  | 0.968116  | 0.996932  |
| gene764 | gene764 | pabA        | gi 57650036 ref NC_002951.2 :793821-796158 | q1 | q2 | OK     | 49.8002 | 48.2273 | -0.046301 | 0.04461  | 0.964414  | 0.996932  |
| gene765 | gene765 | SACOL0774   | gi 57650036 ref NC_002951.2 :793821-796158 | q1 | q2 | OK     | 31.3179 | 36.3049 | 0.213179  | -0.3325  | 0.739515  | 0.986963  |
| gene766 | gene766 | SACOL0776   | gi 57650036 ref NC_002951.2 :796517-798216 | q1 | q2 | OK     | 77.6635 | 37.7978 | -1.03893  | 1.08017  | 0.280065  | 0.879877  |
| gene767 | gene767 | SACOL0777   | gi 57650036 ref NC_002951.2 :796517-798216 | q1 | q2 | OK     | 68.1846 | 59.8266 | -0.188658 | 0.26202  | 0.793304  | 0.987448  |
| gene768 | gene768 | SACOL0778   | gi 57650036 ref NC_002951.2 :798689-800630 | q1 | q2 | OK     | 617.236 | 235.872 | -1.38782  | 1.311    | 0.189859  | 0.819847  |
| gene769 | gene769 | SACOL0779   | gi 57650036 ref NC_002951.2 :800906-802784 | q1 | q2 | OK     | 154.908 | 80.1935 | -0.949855 | 1.18185  | 0.237264  | 0.863102  |
| gene77  | gene77  | SACOL0080   | gi 57650036 ref NC_002951.2 :90215-90986   | q1 | q2 | OK     | 9.41228 | 10.3403 | 0.135659  | -0.2365  | 0.813046  | 0.991128  |
| gene770 | gene770 | recQ1       | gi 57650036 ref NC_002951.2 :802795-804577 | q1 | q2 | OK     | 228.849 | 90.2993 | -1.34161  | 1.55786  | 0.119266  | 0.725355  |
| gene771 | gene771 | SACOL0781   | gi 57650036 ref NC_002951.2 :804798-807283 | q1 | q2 | OK     | 159.931 | 210.682 | 0.397619  | -0.28701 | 0.774104  | 0.986963  |
| gene772 | gene772 | opuBB       | gi 57650036 ref NC_002951.2 :804798-807283 | q1 | q2 | OK     | 115.267 | 136.189 | 0.240631  | -0.18516 | 0.853103  | 0.996923  |
| gene773 | gene773 | hisC        | gi 57650036 ref NC_002951.2 :807522-808581 | q1 | q2 | OK     | 57.4209 | 77.8717 | 0.439524  | -0.84867 | 0.396068  | 0.939607  |
| gene774 | gene774 | SACOL0785   | gi 57650036 ref NC_002951.2 :808931-809474 | q1 | q2 | OK     | 72.3681 | 84.7817 | 0.228399  | -0.4734  | 0.635932  | 0.986963  |
| gene775 | gene775 | SACOL0786   | gi 57650036 ref NC_002951.2 :809586-809748 | q1 | q2 | OK     | 63.7499 | 91.4513 | 0.520581  | -0.5172  | 0.605018  | 0.986963  |
| gene776 | gene776 | SACOL0787   | gi 57650036 ref NC_002951.2 :810153-811071 | q1 | q2 | OK     | 240.826 | 310.064 | 0.364577  | -0.44439 | 0.656759  | 0.986963  |
| gene777 | gene777 | SACOL0788   | gi 57650036 ref NC_002951.2 :811340-812846 | q1 | q2 | OK     | 207.788 | 60.8623 | -1.77149  | 2.33892  | 0.0193394 | 0.323741  |
| gene778 | gene778 | SACOL0789   | gi 57650036 ref NC_002951.2 :813186-813687 | q1 | q2 | OK     | 86.4077 | 45.6987 | -0.919006 | 1.86778  | 0.0617929 | 0.552335  |
| gene779 | gene779 | SACOL0790   | gi 57650036 ref NC_002951.2 :813706-814573 | q1 | q2 | OK     | 76.2032 | 49.28   | -0.628848 | 1.27073  | 0.203825  | 0.821517  |
| gene78  | gene78  | SACOL0081   | gi 57650036 ref NC_002951.2 :91049-91214   | q1 | q2 | NOTEST | 0       | 0       | 0         | 0        | 1         | 1         |
| gene780 | gene780 | SACOL0790.1 | gi 57650036 ref NC_002951.2 :814957-815224 | q1 | q2 | OK     | 64.8777 | 164.508 | 1.34236   | -2.50827 | 0.0121324 | 0.249708  |
| gene781 | gene781 | nrdI        | gi 57650036 ref NC_002951.2 :815373-817840 | q1 | q2 | OK     | 1338.24 | 514.693 | -1.37856  | 0.51023  | 0.609888  | 0.986963  |
| gene782 | gene782 | nrdE        | gi 57650036 ref NC_002951.2 :815373-817840 | q1 | q2 | OK     | 703.233 | 344.221 | -1.03067  | 0.86862  | 0.385058  | 0.938503  |
| gene783 | gene783 | nrdF        | gi 57650036 ref NC_002951.2 :817957-818929 | q1 | q2 | OK     | 430.245 | 307.115 | -0.486379 | 0.52638  | 0.598622  | 0.986963  |
| gene784 | gene784 | SACOL0794   | gi 57650036 ref NC_002951.2 :819061-819166 | q1 | q2 | NOTEST | 0       | 0       | 0         | 0        | 1         | 1         |
| gene785 | gene785 | SACOL0796   | gi 57650036 ref NC_002951.2 :819636-822309 | q1 | q2 | OK     | 64.22   | 46.0756 | -0.479018 | 0.5746   | 0.565562  | 0.985265  |



|         |         |           |                                            |    |    |        |          |          |           |          |           |          |
|---------|---------|-----------|--------------------------------------------|----|----|--------|----------|----------|-----------|----------|-----------|----------|
| gene786 | gene786 | SACOL0797 | gi 57650036 ref NC_002951.2 :819636-822309 | q1 | q2 | OK     | 30.8139  | 30.572   | -0.011369 | 0.01014  | 0.99191   | 0.998143 |
| gene787 | gene787 | SACOL0798 | gi 57650036 ref NC_002951.2 :819636-822309 | q1 | q2 | OK     | 31.5906  | 41.5471  | 0.395252  | -0.32815 | 0.742797  | 0.986963 |
| gene788 | gene788 | SACOL0799 | gi 57650036 ref NC_002951.2 :822427-823456 | q1 | q2 | OK     | 52.0301  | 45.7852  | -0.184463 | 0.37598  | 0.706931  | 0.986963 |
| gene789 | gene789 | SACOL0800 | gi 57650036 ref NC_002951.2 :823772-824087 | q1 | q2 | OK     | 41.2268  | 32.9329  | -0.324056 | 0.54863  | 0.583263  | 0.985265 |
| gene79  | gene79  | SACOL0082 | gi 57650036 ref NC_002951.2 :91226-91823   | q1 | q2 | NOTEST | 0.540447 | 0.319188 | -0.759749 | 0.37723  | 0.706004  | 1        |
| gene790 | gene790 | murB      | gi 57650036 ref NC_002951.2 :824104-825028 | q1 | q2 | OK     | 71.5203  | 61.1899  | -0.22506  | 0.44935  | 0.653179  | 0.986963 |
| gene791 | gene791 | SACOL0802 | gi 57650036 ref NC_002951.2 :825154-825673 | q1 | q2 | OK     | 24.1256  | 27.5247  | 0.190164  | -0.35568 | 0.722077  | 0.986963 |
| gene792 | gene792 | SACOL0803 | gi 57650036 ref NC_002951.2 :825792-826671 | q1 | q2 | OK     | 56.5118  | 47.4812  | -0.251197 | 0.51681  | 0.605292  | 0.986963 |
| gene793 | gene793 | SACOL0804 | gi 57650036 ref NC_002951.2 :826824-827145 | q1 | q2 | OK     | 182.004  | 242.544  | 0.414273  | -0.85768 | 0.391068  | 0.939607 |
| gene794 | gene794 | SACOL0805 | gi 57650036 ref NC_002951.2 :827569-828694 | q1 | q2 | OK     | 229.424  | 115.082  | -0.995349 | 1.33831  | 0.180796  | 0.819812 |
| gene795 | gene795 | pepT      | gi 57650036 ref NC_002951.2 :828882-830109 | q1 | q2 | OK     | 184.571  | 136.515  | -0.435117 | 0.57229  | 0.567126  | 0.985265 |
| gene796 | gene796 | SACOL0807 | gi 57650036 ref NC_002951.2 :830122-830617 | q1 | q2 | OK     | 32.2901  | 31.7568  | -0.024025 | 0.04589  | 0.963396  | 0.996932 |
| gene797 | gene797 | SACOL0808 | gi 57650036 ref NC_002951.2 :830634-831396 | q1 | q2 | OK     | 28.6656  | 33.1007  | 0.207544  | -0.42197 | 0.673049  | 0.986963 |
| gene798 | gene798 | SACOL0809 | gi 57650036 ref NC_002951.2 :831591-832662 | q1 | q2 | OK     | 44.864   | 42.5784  | -0.075435 | 0.15464  | 0.877105  | 0.996932 |
| gene799 | gene799 | SACOL0810 | gi 57650036 ref NC_002951.2 :832979-834035 | q1 | q2 | OK     | 68.695   | 56.0301  | -0.294004 | 0.57735  | 0.563705  | 0.985191 |
| gene8   | gene8   | serS      | gi 57650036 ref NC_002951.2 :12812-14099   | q1 | q2 | OK     | 60.0825  | 53.7708  | -0.160122 | 0.30589  | 0.759686  | 0.986963 |
| gene80  | gene80  | SACOL0083 | gi 57650036 ref NC_002951.2 :91889-92657   | q1 | q2 | OK     | 1.73745  | 2.25941  | 0.378975  | -0.42815 | 0.668546  | 0.986963 |
| gene800 | gene800 | SACOL0811 | gi 57650036 ref NC_002951.2 :834204-834846 | q1 | q2 | OK     | 175.308  | 160.946  | -0.123313 | 0.22234  | 0.824048  | 0.992727 |
| gene801 | gene801 | SACOL0812 | gi 57650036 ref NC_002951.2 :834989-835856 | q1 | q2 | OK     | 224.799  | 92.3759  | -1.28305  | 2.00297  | 0.0451809 | 0.481552 |
| gene802 | gene802 | SACOL0813 | gi 57650036 ref NC_002951.2 :836219-837969 | q1 | q2 | OK     | 39.0883  | 59.7848  | 0.613041  | -0.82695 | 0.408267  | 0.939607 |
| gene803 | gene803 | SACOL0814 | gi 57650036 ref NC_002951.2 :836219-837969 | q1 | q2 | OK     | 55.9944  | 80.5859  | 0.525246  | -0.61814 | 0.536485  | 0.977586 |
| gene804 | gene804 | SACOL0815 | gi 57650036 ref NC_002951.2 :838029-838602 | q1 | q2 | OK     | 1984.82  | 813.828  | -1.28621  | 1.25255  | 0.210371  | 0.830641 |
| gene805 | gene805 | secA      | gi 57650036 ref NC_002951.2 :839015-841547 | q1 | q2 | OK     | 194.071  | 118.891  | -0.706942 | 0.72534  | 0.468241  | 0.954346 |
| gene806 | gene806 | SACOL0817 | gi 57650036 ref NC_002951.2 :841588-841693 | q1 | q2 | NOTEST | 0        | 0        | 0         | 0        | 1         | 1        |
| gene807 | gene807 | prfB      | gi 57650036 ref NC_002951.2 :841861-842972 | q1 | q2 | OK     | 115.988  | 82.6273  | -0.489281 | 0.82716  | 0.408147  | 0.939607 |
| gene808 | gene808 | SACOL0819 | gi 57650036 ref NC_002951.2 :843125-843233 | q1 | q2 | NOTEST | 0        | 0        | 0         | 0        | 1         | 1        |
| gene809 | gene809 | SACOL0820 | gi 57650036 ref NC_002951.2 :843380-844220 | q1 | q2 | OK     | 29.1233  | 43.8601  | 0.590732  | -1.21655 | 0.223776  | 0.853955 |
| gene81  | gene81  | SACOL0084 | gi 57650036 ref NC_002951.2 :92789-94988   | q1 | q2 | OK     | 62.8131  | 66.3773  | 0.0796249 | -0.11673 | 0.907071  | 0.996932 |
| gene810 | gene810 | SACOL0821 | gi 57650036 ref NC_002951.2 :844393-845277 | q1 | q2 | OK     | 65.0222  | 50.8293  | -0.355271 | 0.69148  | 0.489266  | 0.964002 |
| gene811 | gene811 | SACOL0822 | gi 57650036 ref NC_002951.2 :844393-845277 | q1 | q2 | OK     | 45.4054  | 67.1928  | 0.565442  | -0.38711 | 0.698673  | 0.986963 |
| gene812 | gene812 | uvrB      | gi 57650036 ref NC_002951.2 :845539-847531 | q1 | q2 | OK     | 126.449  | 109.714  | -0.204803 | 0.24486  | 0.806563  | 0.990842 |
| gene813 | gene813 | uvrA      | gi 57650036 ref NC_002951.2 :847538-850385 | q1 | q2 | OK     | 137.27   | 101.311  | -0.438223 | 0.4629   | 0.643435  | 0.986963 |
| gene814 | gene814 | hprK      | gi 57650036 ref NC_002951.2 :850991-851924 | q1 | q2 | OK     | 201.438  | 199.875  | -0.011243 | 0.01541  | 0.987702  | 0.998143 |

|         |         |             |                                            |    |    |        |         |         |            |           |           |          |
|---------|---------|-------------|--------------------------------------------|----|----|--------|---------|---------|------------|-----------|-----------|----------|
| gene815 | gene815 | lgt         | gi 57650036 ref NC_002951.2 :851929-852769 | q1 | q2 | OK     | 109.945 | 137.012 | 0.317526   | -0.56367  | 0.572982  | 0.985265 |
| gene816 | gene816 | SACOL0827   | gi 57650036 ref NC_002951.2 :852776-853262 | q1 | q2 | OK     | 81.3767 | 92.8651 | 0.190522   | -0.39484  | 0.692962  | 0.986963 |
| gene817 | gene817 | SACOL0828   | gi 57650036 ref NC_002951.2 :853269-854709 | q1 | q2 | OK     | 56.8508 | 53.4335 | -0.089435  | 0.1669    | 0.867447  | 0.996923 |
| gene818 | gene818 | trxB        | gi 57650036 ref NC_002951.2 :854775-855711 | q1 | q2 | OK     | 843.605 | 818.786 | -0.043082  | 0.03999   | 0.9681    | 0.996932 |
| gene819 | gene819 | SACOL0830   | gi 57650036 ref NC_002951.2 :856420-858324 | q1 | q2 | OK     | 145.196 | 142.345 | -0.028608  | 0.01645   | 0.986872  | 0.998143 |
| gene82  | gene82  | SACOL0085   | gi 57650036 ref NC_002951.2 :95138-96317   | q1 | q2 | OK     | 35.2576 | 35.3083 | 0.0020727  | -0.00428  | 0.996589  | 0.998434 |
| gene820 | gene820 | SACOL0831   | gi 57650036 ref NC_002951.2 :856420-858324 | q1 | q2 | OK     | 243.551 | 328.947 | 0.433634   | -0.36721  | 0.713463  | 0.986963 |
| gene821 | gene821 | SACOL0832   | gi 57650036 ref NC_002951.2 :858433-859378 | q1 | q2 | OK     | 272.377 | 333.085 | 0.290288   | -0.33733  | 0.735867  | 0.986963 |
| gene823 | gene823 | clpP        | gi 57650036 ref NC_002951.2 :859950-860538 | q1 | q2 | OK     | 307.499 | 404.254 | 0.394682   | -0.55078  | 0.581785  | 0.985265 |
| gene824 | gene824 | SACOL0834   | gi 57650036 ref NC_002951.2 :860780-861683 | q1 | q2 | OK     | 113.423 | 102.447 | -0.14683   | 0.26461   | 0.791309  | 0.986986 |
| gene825 | gene825 | SACOL0835   | gi 57650036 ref NC_002951.2 :862386-863016 | q1 | q2 | OK     | 392.36  | 631.194 | 0.685905   | -0.80324  | 0.421835  | 0.939652 |
| gene826 | gene826 | SACOL0836   | gi 57650036 ref NC_002951.2 :863204-863351 | q1 | q2 | NOTEST | 0       | 0       | 0          | 0         | 1         | 1        |
| gene827 | gene827 | gapR        | gi 57650036 ref NC_002951.2 :863775-864789 | q1 | q2 | OK     | 225.362 | 538.019 | 1.25541    | -1.36416  | 0.172518  | 0.819812 |
| gene828 | gene828 | gapA1       | gi 57650036 ref NC_002951.2 :864841-865852 | q1 | q2 | OK     | 222.046 | 723.416 | 1.70397    | -1.80688  | 0.0707803 | 0.590463 |
| gene829 | gene829 | pgk         | gi 57650036 ref NC_002951.2 :865990-867181 | q1 | q2 | OK     | 115.391 | 263.104 | 1.1891     | -1.51307  | 0.130262  | 0.739969 |
| gene83  | gene83  | SACOL0086   | gi 57650036 ref NC_002951.2 :96318-97707   | q1 | q2 | OK     | 83.4875 | 106.781 | 0.355016   | -0.55007  | 0.582269  | 0.985265 |
| gene830 | gene830 | tpiA        | gi 57650036 ref NC_002951.2 :867302-868064 | q1 | q2 | OK     | 105.692 | 298.135 | 1.4961     | -2.274    | 0.0229661 | 0.343261 |
| gene831 | gene831 | pgm         | gi 57650036 ref NC_002951.2 :868066-869584 | q1 | q2 | OK     | 103.441 | 241.658 | 1.22416    | -1.46101  | 0.144013  | 0.77767  |
| gene832 | gene832 | eno         | gi 57650036 ref NC_002951.2 :869713-871018 | q1 | q2 | OK     | 393.964 | 309.438 | -0.348416  | 0.34845   | 0.727504  | 0.986963 |
| gene833 | gene833 | SACOL0843   | gi 57650036 ref NC_002951.2 :871357-871816 | q1 | q2 | OK     | 154.383 | 74.6593 | -1.04812   | 2.13684   | 0.0326112 | 0.420136 |
| gene834 | gene834 | secG        | gi 57650036 ref NC_002951.2 :871882-872116 | q1 | q2 | OK     | 605.288 | 269.881 | -1.1653    | 2.35495   | 0.0185251 | 0.315668 |
| gene835 | gene835 | est         | gi 57650036 ref NC_002951.2 :872231-872972 | q1 | q2 | OK     | 154.455 | 102.326 | -0.594007  | 1.08809   | 0.276555  | 0.879877 |
| gene836 | gene836 | SACOL0846   | gi 57650036 ref NC_002951.2 :873005-875378 | q1 | q2 | OK     | 198.842 | 151.312 | -0.394101  | 0.39715   | 0.691258  | 0.986963 |
| gene837 | gene837 | smpB        | gi 57650036 ref NC_002951.2 :875399-875864 | q1 | q2 | OK     | 271.626 | 166.756 | -0.703886  | 1.33147   | 0.183033  | 0.819812 |
| gene838 | gene838 | SACOL_SatmF | gi 57650036 ref NC_002951.2 :875954-876313 | q1 | q2 | OK     | 106957  | 114813  | 0.102251   | -0.14731  | 0.882889  | 0.996932 |
| gene839 | gene839 | SACOL0848   | gi 57650036 ref NC_002951.2 :876637-876919 | q1 | q2 | OK     | 53.2482 | 79.4786 | 0.577833   | -1.03641  | 0.300012  | 0.892668 |
| gene84  | gene84  | SACOL0087   | gi 57650036 ref NC_002951.2 :97874-97982   | q1 | q2 | NOTEST | 0       | 0       | 0          | 0         | 1         | 1        |
| gene840 | gene840 | SACOL0849   | gi 57650036 ref NC_002951.2 :877185-877509 | q1 | q2 | OK     | 94.8411 | 50.4748 | -0.909949  | 1.72366   | 0.0847684 | 0.638501 |
| gene841 | gene841 | SACOL0850   | gi 57650036 ref NC_002951.2 :877524-877671 | q1 | q2 | OK     | 48.1045 | 27.7808 | -0.792084  | 0.41829   | 0.675738  | 0.986963 |
| gene842 | gene842 | SACOL0851   | gi 57650036 ref NC_002951.2 :877862-878591 | q1 | q2 | OK     | 81.5675 | 52.529  | -0.63488   | 1.29919   | 0.193877  | 0.819847 |
| gene843 | gene843 | SACOL0853   | gi 57650036 ref NC_002951.2 :879026-879182 | q1 | q2 | OK     | 33.7848 | 0       | -1.79769e+ | -1.79769e | 0.075138  | 0.614566 |
| gene844 | gene844 | SACOL0854   | gi 57650036 ref NC_002951.2 :879189-879711 | q1 | q2 | OK     | 64.2246 | 86.1311 | 0.423409   | -0.87562  | 0.381239  | 0.935769 |
| gene845 | gene845 | SACOL0855   | gi 57650036 ref NC_002951.2 :879849-880380 | q1 | q2 | OK     | 76.0468 | 67.2005 | -0.178415  | 0.3692    | 0.711978  | 0.986963 |

|         |         |           |                                            |    |    |        |         |         |           |          |           |          |
|---------|---------|-----------|--------------------------------------------|----|----|--------|---------|---------|-----------|----------|-----------|----------|
| gene846 | gene846 | clfA      | gi 57650036 ref NC_002951.2 :880642-883444 | q1 | q2 | OK     | 514.471 | 1608.13 | 1.64422   | -1.59019 | 0.111793  | 0.717934 |
| gene847 | gene847 | SACOL0857 | gi 57650036 ref NC_002951.2 :883664-885191 | q1 | q2 | OK     | 25.7101 | 41.8102 | 0.701521  | -1.40943 | 0.158707  | 0.801753 |
| gene848 | gene848 | empbp     | gi 57650036 ref NC_002951.2 :885541-886564 | q1 | q2 | OK     | 37.5029 | 49.2597 | 0.393407  | -0.80865 | 0.418716  | 0.939652 |
| gene849 | gene849 | SACOL0859 | gi 57650036 ref NC_002951.2 :886898-887369 | q1 | q2 | OK     | 44.4347 | 53.2054 | 0.259887  | -0.51721 | 0.605011  | 0.986963 |
| gene85  | gene85  | SACOL0088 | gi 57650036 ref NC_002951.2 :98199-99861   | q1 | q2 | OK     | 68.6062 | 153.856 | 1.16517   | -1.56635 | 0.117266  | 0.723345 |
| gene850 | gene850 | nuc       | gi 57650036 ref NC_002951.2 :887709-888396 | q1 | q2 | OK     | 20.9856 | 29.894  | 0.510455  | -1.00178 | 0.316451  | 0.892668 |
| gene851 | gene851 | SACOL0861 | gi 57650036 ref NC_002951.2 :888752-888953 | q1 | q2 | OK     | 16060.6 | 4299.58 | -1.90126  | 2.14715  | 0.0317815 | 0.419363 |
| gene852 | gene852 | SACOL0862 | gi 57650036 ref NC_002951.2 :889448-889667 | q1 | q2 | OK     | 320.014 | 140.088 | -1.1918   | 2.2224   | 0.0262563 | 0.372484 |
| gene853 | gene853 | SACOL0863 | gi 57650036 ref NC_002951.2 :889728-890013 | q1 | q2 | OK     | 77.8136 | 56.6118 | -0.458919 | 0.82817  | 0.407572  | 0.939607 |
| gene854 | gene854 | SACOL0864 | gi 57650036 ref NC_002951.2 :890100-890670 | q1 | q2 | OK     | 49.6098 | 55.6542 | 0.165864  | -0.3405  | 0.733481  | 0.986963 |
| gene855 | gene855 | SACOL0865 | gi 57650036 ref NC_002951.2 :891074-891335 | q1 | q2 | OK     | 41.4306 | 18.3109 | -1.17799  | 1.61225  | 0.106907  | 0.706427 |
| gene856 | gene856 | SACOL0866 | gi 57650036 ref NC_002951.2 :891639-891744 | q1 | q2 | NOTEST | 0       | 0       | 0         | 0        | 1         | 1        |
| gene857 | gene857 | SACOL0868 | gi 57650036 ref NC_002951.2 :891875-892112 | q1 | q2 | OK     | 886.247 | 1091.3  | 0.300272  | -0.57729 | 0.563745  | 0.985191 |
| gene858 | gene858 | SACOL0869 | gi 57650036 ref NC_002951.2 :892327-892918 | q1 | q2 | OK     | 46.0434 | 39.8369 | -0.208888 | 0.42406  | 0.67152   | 0.986963 |
| gene859 | gene859 | SACOL0870 | gi 57650036 ref NC_002951.2 :892990-893608 | q1 | q2 | OK     | 53.8338 | 82.9348 | 0.623465  | -1.28701 | 0.198092  | 0.819847 |
| gene86  | gene86  | SACOL0089 | gi 57650036 ref NC_002951.2 :100186-101962 | q1 | q2 | OK     | 31.8693 | 39.5095 | 0.310032  | -0.60463 | 0.545428  | 0.979019 |
| gene860 | gene860 | SACOL0871 | gi 57650036 ref NC_002951.2 :893762-894257 | q1 | q2 | OK     | 78.0639 | 77.0631 | -0.018614 | 0.03852  | 0.969276  | 0.996932 |
| gene861 | gene861 | SACOL0872 | gi 57650036 ref NC_002951.2 :894655-895078 | q1 | q2 | OK     | 108.868 | 168.931 | 0.633848  | -1.30485 | 0.191944  | 0.819847 |
| gene862 | gene862 | aroD      | gi 57650036 ref NC_002951.2 :895225-895942 | q1 | q2 | OK     | 40.9387 | 40.8384 | -0.003537 | 0.00729  | 0.994186  | 0.998143 |
| gene863 | gene863 | SACOL0874 | gi 57650036 ref NC_002951.2 :896024-896564 | q1 | q2 | OK     | 303.038 | 103.999 | -1.54294  | 2.72138  | 0.0065009 | 0.16657  |
| gene864 | gene864 | SACOL0875 | gi 57650036 ref NC_002951.2 :896713-897034 | q1 | q2 | OK     | 130.982 | 185.25  | 0.500103  | -1.02995 | 0.303034  | 0.892668 |
| gene865 | gene865 | SACOL0876 | gi 57650036 ref NC_002951.2 :897177-897534 | q1 | q2 | OK     | 245.014 | 144.081 | -0.765987 | 1.56554  | 0.117457  | 0.723345 |
| gene866 | gene866 | gcvH      | gi 57650036 ref NC_002951.2 :897691-898072 | q1 | q2 | OK     | 611.908 | 489.355 | -0.322433 | 0.50324  | 0.614797  | 0.986963 |
| gene867 | gene867 | SACOL0879 | gi 57650036 ref NC_002951.2 :898250-899129 | q1 | q2 | OK     | 44.2974 | 31.3376 | -0.49933  | 1.03121  | 0.302442  | 0.892668 |
| gene868 | gene868 | SACOL0880 | gi 57650036 ref NC_002951.2 :899870-900546 | q1 | q2 | OK     | 111.472 | 89.9525 | -0.309451 | 0.50251  | 0.61531   | 0.986963 |
| gene869 | gene869 | SACOL0881 | gi 57650036 ref NC_002951.2 :899870-900546 | q1 | q2 | OK     | 141.065 | 72.6795 | -0.956738 | 1.18084  | 0.237667  | 0.863102 |
| gene87  | gene87  | SACOL0090 | gi 57650036 ref NC_002951.2 :102135-103008 | q1 | q2 | NOTEST | 0       | 0       | 0         | 0        | 1         | 1        |
| gene870 | gene870 | SACOL0882 | gi 57650036 ref NC_002951.2 :900795-902509 | q1 | q2 | OK     | 107.528 | 38.7344 | -1.47302  | 2.02404  | 0.0429658 | 0.472836 |
| gene871 | gene871 | SACOL0883 | gi 57650036 ref NC_002951.2 :900795-902509 | q1 | q2 | OK     | 63.1978 | 45.8583 | -0.462693 | 0.43033  | 0.666959  | 0.986963 |
| gene872 | gene872 | SACOL0884 | gi 57650036 ref NC_002951.2 :902526-903348 | q1 | q2 | OK     | 71.1859 | 59.1612 | -0.266941 | 0.5433   | 0.586923  | 0.985265 |
| gene873 | gene873 | SACOL0885 | gi 57650036 ref NC_002951.2 :903490-904711 | q1 | q2 | OK     | 24.3981 | 30.6959 | 0.331275  | -0.68605 | 0.492684  | 0.964002 |
| gene874 | gene874 | sek       | gi 57650036 ref NC_002951.2 :904799-905528 | q1 | q2 | OK     | 29.736  | 41.1518 | 0.468744  | -0.95654 | 0.3388    | 0.905587 |
| gene875 | gene875 | sei       | gi 57650036 ref NC_002951.2 :905551-906280 | q1 | q2 | OK     | 18.998  | 41.3939 | 1.12357   | -2.23354 | 0.0255132 | 0.368182 |

|         |         |           |                                            |    |    |        |         |         |           |          |           |          |
|---------|---------|-----------|--------------------------------------------|----|----|--------|---------|---------|-----------|----------|-----------|----------|
| gene876 | gene876 | SACOL0888 | gi 57650036 ref NC_002951.2 :906349-906781 | q1 | q2 | OK     | 29.9141 | 51.4494 | 0.782327  | -1.48481 | 0.137595  | 0.761017 |
| gene877 | gene877 | SACOL0889 | gi 57650036 ref NC_002951.2 :906797-907256 | q1 | q2 | OK     | 22.3396 | 40.6797 | 0.864706  | -1.59983 | 0.109636  | 0.715052 |
| gene878 | gene878 | SACOL0890 | gi 57650036 ref NC_002951.2 :907267-907600 | q1 | q2 | OK     | 36.7006 | 59.7706 | 0.70363   | -1.27373 | 0.202758  | 0.819847 |
| gene879 | gene879 | SACOL0891 | gi 57650036 ref NC_002951.2 :907792-908321 | q1 | q2 | OK     | 49.872  | 88.3552 | 0.825086  | -1.2806  | 0.200335  | 0.819847 |
| gene88  | gene88  | SACOL0091 | gi 57650036 ref NC_002951.2 :103120-104518 | q1 | q2 | NOTEST | 0       | 0       | 0         | 0        | 1         | 1        |
| gene880 | gene880 | SACOL0892 | gi 57650036 ref NC_002951.2 :907792-908321 | q1 | q2 | OK     | 15.5698 | 37.7714 | 1.27854   | -1.24499 | 0.213137  | 0.831197 |
| gene881 | gene881 | SACOL0893 | gi 57650036 ref NC_002951.2 :908332-908681 | q1 | q2 | NOTEST | 0       | 0       | 0         | 0        | 1         | 1        |
| gene882 | gene882 | SACOL0894 | gi 57650036 ref NC_002951.2 :908332-908681 | q1 | q2 | NOTEST | 0       | 0       | 0         | 0        | 1         | 1        |
| gene883 | gene883 | SACOL0895 | gi 57650036 ref NC_002951.2 :908683-909004 | q1 | q2 | NOTEST | 0       | 0       | 0         | 0        | 1         | 1        |
| gene884 | gene884 | SACOL0896 | gi 57650036 ref NC_002951.2 :909067-909937 | q1 | q2 | NOTEST | 0       | 0       | 0         | 0        | 1         | 1        |
| gene885 | gene885 | SACOL0897 | gi 57650036 ref NC_002951.2 :909953-911411 | q1 | q2 | NOTEST | 0       | 0       | 0         | 0        | 1         | 1        |
| gene886 | gene886 | SACOL0898 | gi 57650036 ref NC_002951.2 :911711-912074 | q1 | q2 | NOTEST | 0       | 0       | 0         | 0        | 1         | 1        |
| gene887 | gene887 | SACOL0899 | gi 57650036 ref NC_002951.2 :912075-912998 | q1 | q2 | NOTEST | 0       | 0       | 0         | 0        | 1         | 1        |
| gene888 | gene888 | SACOL0900 | gi 57650036 ref NC_002951.2 :912075-912998 | q1 | q2 | OK     | 29.0957 | 30.8072 | 0.0824606 | -0.16241 | 0.870987  | 0.996923 |
| gene889 | gene889 | SACOL0901 | gi 57650036 ref NC_002951.2 :913514-913856 | q1 | q2 | OK     | 68.9111 | 43.9633 | -0.648436 | 1.21296  | 0.225145  | 0.857109 |
| gene89  | gene89  | SACOL0092 | gi 57650036 ref NC_002951.2 :104707-105181 | q1 | q2 | OK     | 93.6838 | 132.098 | 0.495735  | -1.02271 | 0.306444  | 0.892668 |
| gene890 | gene890 | SACOL0902 | gi 57650036 ref NC_002951.2 :913867-914446 | q1 | q2 | OK     | 77.5759 | 44.7136 | -0.794895 | 1.62995  | 0.103112  | 0.686774 |
| gene891 | gene891 | SACOL0903 | gi 57650036 ref NC_002951.2 :914463-914682 | q1 | q2 | OK     | 366.683 | 124.169 | -1.56223  | 2.88594  | 0.0039024 | 0.12949  |
| gene892 | gene892 | SACOL0904 | gi 57650036 ref NC_002951.2 :914732-915260 | q1 | q2 | OK     | 63.1505 | 56.6784 | -0.155994 | 0.32045  | 0.748626  | 0.986963 |
| gene893 | gene893 | SACOL0905 | gi 57650036 ref NC_002951.2 :915262-916170 | q1 | q2 | OK     | 54.8613 | 43.1338 | -0.346968 | 0.39679  | 0.691523  | 0.986963 |
| gene894 | gene894 | SACOL0906 | gi 57650036 ref NC_002951.2 :915262-916170 | q1 | q2 | OK     | 44.995  | 47.1183 | 0.0665233 | -0.11438 | 0.90894   | 0.996932 |
| gene895 | gene895 | seb       | gi 57650036 ref NC_002951.2 :916477-917278 | q1 | q2 | NOTEST | 0       | 0       | 0         | 0        | 1         | 1        |
| gene896 | gene896 | SACOL0908 | gi 57650036 ref NC_002951.2 :917355-917913 | q1 | q2 | NOTEST | 0       | 0       | 0         | 0        | 1         | 1        |
| gene897 | gene897 | SACOL0909 | gi 57650036 ref NC_002951.2 :918285-918438 | q1 | q2 | OK     | 151.319 | 215.539 | 0.510352  | -0.60771 | 0.543382  | 0.979019 |
| gene898 | gene898 | SACOL0910 | gi 57650036 ref NC_002951.2 :918508-918806 | q1 | q2 | NOTEST | 0       | 0       | 0         | 0        | 1         | 1        |
| gene899 | gene899 | SACOL0911 | gi 57650036 ref NC_002951.2 :918508-918806 | q1 | q2 | OK     | 224.912 | 95.7591 | -1.23188  | 1.97421  | 0.0483575 | 0.498616 |
| gene9   | gene9   | SACOL0010 | gi 57650036 ref NC_002951.2 :14748-15770   | q1 | q2 | OK     | 60.5646 | 72.9095 | 0.267632  | -0.48787 | 0.625645  | 0.986963 |
| gene90  | gene90  | SACOL0093 | gi 57650036 ref NC_002951.2 :105442-107035 | q1 | q2 | OK     | 90.0356 | 87.1153 | -0.047569 | 0.07101  | 0.943392  | 0.996932 |
| gene900 | gene900 | SACOL0912 | gi 57650036 ref NC_002951.2 :919636-919831 | q1 | q2 | OK     | 9232.35 | 46643.6 | 2.33691   | -2.29229 | 0.0218889 | 0.342403 |
| gene901 | gene901 | SACOL0913 | gi 57650036 ref NC_002951.2 :920063-920915 | q1 | q2 | OK     | 135.608 | 254.491 | 0.908169  | -1.3301  | 0.183486  | 0.819812 |
| gene902 | gene902 | SACOL0914 | gi 57650036 ref NC_002951.2 :921242-922004 | q1 | q2 | OK     | 749.79  | 465.464 | -0.687815 | 0.71127  | 0.476916  | 0.960423 |
| gene903 | gene903 | sufD      | gi 57650036 ref NC_002951.2 :922101-923409 | q1 | q2 | OK     | 642.02  | 289.339 | -1.14986  | 1.12035  | 0.262565  | 0.875983 |
| gene904 | gene904 | SACOL0916 | gi 57650036 ref NC_002951.2 :923523-925219 | q1 | q2 | OK     | 607.495 | 302.622 | -1.00536  | 0.84948  | 0.395614  | 0.939607 |

|         |         |           |                                            |    |    |        |         |         |           |          |           |           |
|---------|---------|-----------|--------------------------------------------|----|----|--------|---------|---------|-----------|----------|-----------|-----------|
| gene905 | gene905 | SACOL0917 | gi 57650036 ref NC_002951.2 :923523-925219 | q1 | q2 | OK     | 615.164 | 275.428 | -1.1593   | 0.50095  | 0.616408  | 0.986963  |
| gene906 | gene906 | sufB      | gi 57650036 ref NC_002951.2 :925369-926767 | q1 | q2 | OK     | 597.535 | 262.58  | -1.18626  | 1.15834  | 0.246725  | 0.869586  |
| gene907 | gene907 | SACOL0919 | gi 57650036 ref NC_002951.2 :926953-927091 | q1 | q2 | OK     | 96.9128 | 42.8646 | -1.1769   | 0.64183  | 0.520986  | 0.972546  |
| gene908 | gene908 | SACOL0920 | gi 57650036 ref NC_002951.2 :927096-927411 | q1 | q2 | OK     | 34.8843 | 39.9186 | 0.194486  | -0.33086 | 0.740754  | 0.986963  |
| gene909 | gene909 | SACOL0921 | gi 57650036 ref NC_002951.2 :927775-928816 | q1 | q2 | OK     | 111.379 | 110.475 | -0.011761 | 0.01971  | 0.984271  | 0.998143  |
| gene91  | gene91  | spa       | gi 57650036 ref NC_002951.2 :107363-108890 | q1 | q2 | OK     | 635.261 | 49.2869 | -3.68807  | 4.26837  | 1.97E-05  | 0.0057093 |
| gene910 | gene910 | SACOL0922 | gi 57650036 ref NC_002951.2 :928829-929897 | q1 | q2 | OK     | 106.49  | 148.185 | 0.476687  | -0.7435  | 0.45718   | 0.950521  |
| gene911 | gene911 | SACOL0924 | gi 57650036 ref NC_002951.2 :930109-930958 | q1 | q2 | OK     | 63.5971 | 103.803 | 0.70681   | -1.37568 | 0.16892   | 0.814226  |
| gene912 | gene912 | SACOL0925 | gi 57650036 ref NC_002951.2 :930970-931798 | q1 | q2 | OK     | 43.8666 | 59.8408 | 0.448004  | -0.92412 | 0.355425  | 0.914747  |
| gene913 | gene913 | SACOL0926 | gi 57650036 ref NC_002951.2 :931824-933144 | q1 | q2 | OK     | 77.2434 | 80.9323 | 0.0673024 | -0.11545 | 0.908088  | 0.996932  |
| gene914 | gene914 | lipA      | gi 57650036 ref NC_002951.2 :933227-934145 | q1 | q2 | OK     | 491.686 | 337.222 | -0.544039 | 0.58177  | 0.560724  | 0.984802  |
| gene915 | gene915 | SACOL0928 | gi 57650036 ref NC_002951.2 :934265-934658 | q1 | q2 | OK     | 136.379 | 79.8445 | -0.77236  | 1.58066  | 0.113956  | 0.720767  |
| gene916 | gene916 | SACOL0929 | gi 57650036 ref NC_002951.2 :934736-934994 | q1 | q2 | OK     | 83.0117 | 56.986  | -0.542707 | 0.93466  | 0.349962  | 0.913467  |
| gene917 | gene917 | SACOL0930 | gi 57650036 ref NC_002951.2 :935100-936314 | q1 | q2 | OK     | 63.5024 | 91.7178 | 0.530391  | -0.49552 | 0.620236  | 0.986963  |
| gene918 | gene918 | SACOL0931 | gi 57650036 ref NC_002951.2 :935100-936314 | q1 | q2 | OK     | 86.1118 | 97.8596 | 0.184503  | -0.28837 | 0.773063  | 0.986963  |
| gene919 | gene919 | SACOL0932 | gi 57650036 ref NC_002951.2 :936346-937306 | q1 | q2 | OK     | 106.27  | 88.4698 | -0.264477 | 0.48013  | 0.631138  | 0.986963  |
| gene92  | gene92  | sarS      | gi 57650036 ref NC_002951.2 :109310-110063 | q1 | q2 | OK     | 173.259 | 66.3185 | -1.38545  | 2.51202  | 0.0120041 | 0.249708  |
| gene920 | gene920 | SACOL0933 | gi 57650036 ref NC_002951.2 :937559-937670 | q1 | q2 | NOTEST | 0       | 0       | 0         | 0        | 1         | 1         |
| gene921 | gene921 | SACOL0934 | gi 57650036 ref NC_002951.2 :937717-937870 | q1 | q2 | OK     | 390.908 | 474.185 | 0.278622  | -0.42534 | 0.670587  | 0.986963  |
| gene922 | gene922 | dltA      | gi 57650036 ref NC_002951.2 :937885-940554 | q1 | q2 | OK     | 285.486 | 351.127 | 0.298573  | -0.23585 | 0.813549  | 0.991128  |
| gene923 | gene923 | dltB      | gi 57650036 ref NC_002951.2 :937885-940554 | q1 | q2 | OK     | 124.459 | 206.256 | 0.728762  | -0.36879 | 0.712284  | 0.986963  |
| gene924 | gene924 | dltC      | gi 57650036 ref NC_002951.2 :940571-941980 | q1 | q2 | OK     | 501.141 | 715.951 | 0.514643  | -0.26427 | 0.791576  | 0.986986  |
| gene925 | gene925 | dltD      | gi 57650036 ref NC_002951.2 :940571-941980 | q1 | q2 | OK     | 133.873 | 208.895 | 0.641912  | -0.7042  | 0.481306  | 0.961304  |
| gene926 | gene926 | SACOL0939 | gi 57650036 ref NC_002951.2 :942242-942464 | q1 | q2 | OK     | 185.852 | 144.173 | -0.366355 | 0.67238  | 0.501341  | 0.965124  |
| gene927 | gene927 | SACOL0940 | gi 57650036 ref NC_002951.2 :942585-942909 | q1 | q2 | OK     | 117.991 | 162.641 | 0.46301   | -0.94904 | 0.342601  | 0.905587  |
| gene928 | gene928 | SACOL0941 | gi 57650036 ref NC_002951.2 :942969-944032 | q1 | q2 | OK     | 203.824 | 108.765 | -0.906106 | 1.29826  | 0.194196  | 0.819847  |
| gene929 | gene929 | SACOL0942 | gi 57650036 ref NC_002951.2 :944348-944585 | q1 | q2 | OK     | 568.409 | 803.996 | 0.500261  | -1.01783 | 0.308759  | 0.892668  |
| gene93  | gene93  | sirC      | gi 57650036 ref NC_002951.2 :110431-112422 | q1 | q2 | OK     | 37.7518 | 73.2268 | 0.955827  | -1.56759 | 0.116977  | 0.723345  |
| gene930 | gene930 | SACOL0943 | gi 57650036 ref NC_002951.2 :944597-944957 | q1 | q2 | OK     | 277.518 | 288.517 | 0.0560746 | -0.11125 | 0.911416  | 0.996932  |
| gene931 | gene931 | SACOL0944 | gi 57650036 ref NC_002951.2 :945410-946619 | q1 | q2 | OK     | 190.545 | 89.5563 | -1.08927  | 1.53706  | 0.124278  | 0.732386  |
| gene932 | gene932 | SACOL0945 | gi 57650036 ref NC_002951.2 :946749-948225 | q1 | q2 | OK     | 42.9008 | 98.3706 | 1.19722   | -2.00261 | 0.0452188 | 0.481552  |
| gene933 | gene933 | SACOL0946 | gi 57650036 ref NC_002951.2 :948635-949952 | q1 | q2 | OK     | 78.8553 | 66.2228 | -0.251878 | 0.44557  | 0.655911  | 0.986963  |
| gene934 | gene934 | SACOL0947 | gi 57650036 ref NC_002951.2 :949970-950345 | q1 | q2 | OK     | 83.1425 | 85.9337 | 0.0476381 | -0.09631 | 0.923278  | 0.996932  |

|         |         |           |                                            |    |    |    |         |         |           |          |           |          |
|---------|---------|-----------|--------------------------------------------|----|----|----|---------|---------|-----------|----------|-----------|----------|
| gene935 | gene935 | SACOL0948 | gi 57650036 ref NC_002951.2 :950400-951555 | q1 | q2 | OK | 28.6114 | 38.084  | 0.412595  | -0.85226 | 0.39407   | 0.939607 |
| gene936 | gene936 | mnhG      | gi 57650036 ref NC_002951.2 :951803-952910 | q1 | q2 | OK | 65.255  | 59.149  | -0.141736 | 0.14121  | 0.887707  | 0.996932 |
| gene937 | gene937 | mnhF      | gi 57650036 ref NC_002951.2 :951803-952910 | q1 | q2 | OK | 62.0376 | 46.1883 | -0.425617 | 0.31841  | 0.750173  | 0.986963 |
| gene938 | gene938 | mnhE      | gi 57650036 ref NC_002951.2 :951803-952910 | q1 | q2 | OK | 104.894 | 81.8403 | -0.358045 | 0.56561  | 0.57166   | 0.985265 |
| gene939 | gene939 | mnhD      | gi 57650036 ref NC_002951.2 :952911-957568 | q1 | q2 | OK | 107.166 | 79.1899 | -0.436463 | 0.20471  | 0.837798  | 0.996923 |
| gene94  | gene94  | sirB      | gi 57650036 ref NC_002951.2 :110431-112422 | q1 | q2 | OK | 20.2726 | 16.7482 | -0.275526 | 0.25675  | 0.797375  | 0.988745 |
| gene940 | gene940 | mnhC      | gi 57650036 ref NC_002951.2 :952911-957568 | q1 | q2 | OK | 206.064 | 152.627 | -0.43308  | 0.09975  | 0.920546  | 0.996932 |
| gene941 | gene941 | mnhB      | gi 57650036 ref NC_002951.2 :952911-957568 | q1 | q2 | OK | 66.3042 | 71.403  | 0.106885  | -0.01894 | 0.984889  | 0.998143 |
| gene942 | gene942 | mnhA      | gi 57650036 ref NC_002951.2 :952911-957568 | q1 | q2 | OK | 153.327 | 146.865 | -0.062118 | 0.04833  | 0.961452  | 0.996932 |
| gene943 | gene943 | kapB      | gi 57650036 ref NC_002951.2 :957698-958082 | q1 | q2 | OK | 46.8265 | 70.2747 | 0.585682  | -1.13957 | 0.254467  | 0.875983 |
| gene944 | gene944 | SACOL0957 | gi 57650036 ref NC_002951.2 :958145-958739 | q1 | q2 | OK | 206.82  | 167.188 | -0.306907 | 0.55239  | 0.580679  | 0.985265 |
| gene945 | gene945 | SACOL0958 | gi 57650036 ref NC_002951.2 :959154-959532 | q1 | q2 | OK | 448.499 | 302.585 | -0.567763 | 1.02394  | 0.305862  | 0.892668 |
| gene946 | gene946 | SACOL0959 | gi 57650036 ref NC_002951.2 :959893-961021 | q1 | q2 | OK | 124.782 | 227.616 | 0.867194  | -1.15258 | 0.249085  | 0.869891 |
| gene947 | gene947 | rocD      | gi 57650036 ref NC_002951.2 :961328-962519 | q1 | q2 | OK | 959.215 | 700.648 | -0.453165 | 0.41319  | 0.679467  | 0.986963 |
| gene948 | gene948 | gluD      | gi 57650036 ref NC_002951.2 :962627-963872 | q1 | q2 | OK | 1789.9  | 965.804 | -0.890073 | 0.82399  | 0.409947  | 0.939607 |
| gene949 | gene949 | SACOL0962 | gi 57650036 ref NC_002951.2 :964374-965304 | q1 | q2 | OK | 51.6598 | 56.8054 | 0.136987  | -0.27984 | 0.779603  | 0.986963 |
| gene95  | gene95  | sirA      | gi 57650036 ref NC_002951.2 :112437-113430 | q1 | q2 | OK | 48.8314 | 43.4127 | -0.169692 | 0.34865  | 0.72735   | 0.986963 |
| gene950 | gene950 | argH      | gi 57650036 ref NC_002951.2 :965545-968120 | q1 | q2 | OK | 190.365 | 46.612  | -2.02999  | 1.68401  | 0.0921799 | 0.659441 |
| gene951 | gene951 | argG      | gi 57650036 ref NC_002951.2 :965545-968120 | q1 | q2 | OK | 232.906 | 47.1711 | -2.30377  | 1.90752  | 0.0564529 | 0.540443 |
| gene952 | gene952 | SACOL0965 | gi 57650036 ref NC_002951.2 :968264-968399 | q1 | q2 | OK | 28.3219 | 50.5369 | 0.83542   | -0.35456 | 0.72292   | 0.986963 |
| gene953 | gene953 | pgi       | gi 57650036 ref NC_002951.2 :968470-969802 | q1 | q2 | OK | 106.468 | 153.155 | 0.524575  | -0.72551 | 0.468141  | 0.954346 |
| gene954 | gene954 | SACOL0967 | gi 57650036 ref NC_002951.2 :970126-970702 | q1 | q2 | OK | 50.8673 | 49.0894 | -0.051327 | 0.10515  | 0.916261  | 0.996932 |
| gene955 | gene955 | spsA      | gi 57650036 ref NC_002951.2 :970706-971231 | q1 | q2 | OK | 69.2065 | 71.0826 | 0.0385874 | -0.07982 | 0.936378  | 0.996932 |
| gene956 | gene956 | spsB      | gi 57650036 ref NC_002951.2 :971237-971822 | q1 | q2 | OK | 68.9497 | 52.2645 | -0.399714 | 0.82508  | 0.409329  | 0.939607 |
| gene957 | gene957 | rexB      | gi 57650036 ref NC_002951.2 :971981-975458 | q1 | q2 | OK | 92.2547 | 87.3561 | -0.078715 | 0.0845   | 0.932662  | 0.996932 |
| gene958 | gene958 | rexA      | gi 57650036 ref NC_002951.2 :975458-979112 | q1 | q2 | OK | 94.6009 | 64.1956 | -0.559379 | 0.61746  | 0.536932  | 0.977691 |
| gene959 | gene959 | SACOL0973 | gi 57650036 ref NC_002951.2 :979277-980180 | q1 | q2 | OK | 564.908 | 309.911 | -0.866159 | 0.92719  | 0.353831  | 0.914747 |
| gene96  | gene96  | SACOL0100 | gi 57650036 ref NC_002951.2 :113693-114641 | q1 | q2 | OK | 17.2177 | 24.5379 | 0.511116  | -1.02594 | 0.304922  | 0.892668 |
| gene960 | gene960 | SACOL0974 | gi 57650036 ref NC_002951.2 :980508-980898 | q1 | q2 | OK | 103.674 | 109.061 | 0.0730799 | -0.15077 | 0.880157  | 0.996932 |
| gene961 | gene961 | SACOL0975 | gi 57650036 ref NC_002951.2 :981068-982385 | q1 | q2 | OK | 176.342 | 228.166 | 0.371708  | -0.43369 | 0.664514  | 0.986963 |
| gene962 | gene962 | SACOL0976 | gi 57650036 ref NC_002951.2 :982436-983261 | q1 | q2 | OK | 166.574 | 299.572 | 0.846734  | -1.1727  | 0.240915  | 0.865486 |
| gene963 | gene963 | SACOL0977 | gi 57650036 ref NC_002951.2 :983374-983683 | q1 | q2 | OK | 329.894 | 218.418 | -0.594908 | 1.21658  | 0.223763  | 0.853955 |
| gene964 | gene964 | SACOL0978 | gi 57650036 ref NC_002951.2 :984229-986044 | q1 | q2 | OK | 20.6491 | 32.0839 | 0.635774  | -1.2862  | 0.198373  | 0.819847 |

|         |         |           |                                              |    |    |        |         |         |           |          |           |          |
|---------|---------|-----------|----------------------------------------------|----|----|--------|---------|---------|-----------|----------|-----------|----------|
| gene965 | gene965 | clpB      | gi 57650036 ref NC_002951.2 :986246-988856   | q1 | q2 | OK     | 365.32  | 96.9277 | -1.91418  | 1.93147  | 0.0534247 | 0.529932 |
| gene966 | gene966 | SACOL0980 | gi 57650036 ref NC_002951.2 :988914-989784   | q1 | q2 | OK     | 18.6393 | 24.8211 | 0.413216  | -0.82504 | 0.40935   | 0.939607 |
| gene967 | gene967 | SACOL0981 | gi 57650036 ref NC_002951.2 :989893-993274   | q1 | q2 | OK     | 16.8043 | 27.457  | 0.708342  | -0.74945 | 0.453587  | 0.949773 |
| gene968 | gene968 | SACOL0982 | gi 57650036 ref NC_002951.2 :989893-993274   | q1 | q2 | OK     | 18.3376 | 21.8818 | 0.25492   | -0.17814 | 0.858617  | 0.996923 |
| gene969 | gene969 | SACOL0983 | gi 57650036 ref NC_002951.2 :989893-993274   | q1 | q2 | OK     | 17.1603 | 29.5199 | 0.782612  | -0.83647 | 0.402891  | 0.939607 |
| gene97  | gene97  | SACOL0101 | gi 57650036 ref NC_002951.2 :114649-115648   | q1 | q2 | OK     | 26.6074 | 34.0213 | 0.354613  | -0.7329  | 0.463618  | 0.952374 |
| gene970 | gene970 | SACOL0984 | gi 57650036 ref NC_002951.2 :989893-993274   | q1 | q2 | OK     | 33.0013 | 51.1806 | 0.633074  | -0.54744 | 0.584079  | 0.985265 |
| gene971 | gene971 | SACOL0985 | gi 57650036 ref NC_002951.2 :993584-994019   | q1 | q2 | OK     | 58.283  | 76.5188 | 0.392739  | -0.79525 | 0.426471  | 0.940178 |
| gene972 | gene972 | SACOL0986 | gi 57650036 ref NC_002951.2 :994275-994461   | q1 | q2 | OK     | 609.987 | 314.926 | -0.953766 | 1.77394  | 0.0760729 | 0.618185 |
| gene973 | gene973 | fabH      | gi 57650036 ref NC_002951.2 :994755-995697   | q1 | q2 | OK     | 59.0845 | 66.1836 | 0.163693  | -0.3286  | 0.742458  | 0.986963 |
| gene974 | gene974 | fabF      | gi 57650036 ref NC_002951.2 :995708-996953   | q1 | q2 | OK     | 183.631 | 150.635 | -0.28576  | 0.36656  | 0.713947  | 0.986963 |
| gene975 | gene975 | SACOL0989 | gi 57650036 ref NC_002951.2 :997007-997379   | q1 | q2 | OK     | 37.6255 | 28.6323 | -0.394068 | 0.69718  | 0.485689  | 0.964002 |
| gene976 | gene976 | SACOL0990 | gi 57650036 ref NC_002951.2 :997601-999618   | q1 | q2 | NOTEST | 0       | 0       | 0         | 0        | 1         | 1        |
| gene977 | gene977 | oppB      | gi 57650036 ref NC_002951.2 :997601-999618   | q1 | q2 | OK     | 176.678 | 110.154 | -0.681598 | 0.47529  | 0.63458   | 0.986963 |
| gene978 | gene978 | oppC      | gi 57650036 ref NC_002951.2 :997601-999618   | q1 | q2 | OK     | 184.199 | 161.53  | -0.18946  | 0.16837  | 0.866292  | 0.996923 |
| gene979 | gene979 | oppD      | gi 57650036 ref NC_002951.2 :999634-1001648  | q1 | q2 | OK     | 374.565 | 267.489 | -0.485735 | 0.3707   | 0.710862  | 0.986963 |
| gene98  | gene98  | SACOL0102 | gi 57650036 ref NC_002951.2 :115668-124110   | q1 | q2 | OK     | 23.1798 | 25.9064 | 0.160442  | -0.06739 | 0.94627   | 0.996932 |
| gene980 | gene980 | oppF      | gi 57650036 ref NC_002951.2 :999634-1001648  | q1 | q2 | OK     | 291.683 | 182.876 | -0.673538 | 0.40432  | 0.685977  | 0.986963 |
| gene981 | gene981 | SACOL0995 | gi 57650036 ref NC_002951.2 :1001665-1003321 | q1 | q2 | OK     | 476.506 | 207.354 | -1.2004   | 1.18016  | 0.237937  | 0.863102 |
| gene982 | gene982 | SACOL0996 | gi 57650036 ref NC_002951.2 :1003532-1005248 | q1 | q2 | OK     | 29.0701 | 43.2118 | 0.571889  | -1.11739 | 0.263828  | 0.875983 |
| gene983 | gene983 | SACOL0997 | gi 57650036 ref NC_002951.2 :1005298-1006285 | q1 | q2 | OK     | 24.7362 | 35.8443 | 0.535118  | -1.10328 | 0.269904  | 0.875983 |
| gene984 | gene984 | SACOL0998 | gi 57650036 ref NC_002951.2 :1006287-1008223 | q1 | q2 | OK     | 22.0711 | 29.6529 | 0.426014  | -0.56269 | 0.573644  | 0.985265 |
| gene985 | gene985 | SACOL0999 | gi 57650036 ref NC_002951.2 :1006287-1008223 | q1 | q2 | OK     | 29.416  | 39.4889 | 0.424847  | -0.64039 | 0.52192   | 0.972546 |
| gene986 | gene986 | SACOL1000 | gi 57650036 ref NC_002951.2 :1008234-1009116 | q1 | q2 | OK     | 48.4897 | 52.9508 | 0.126975  | -0.26176 | 0.793509  | 0.987448 |
| gene987 | gene987 | trpS      | gi 57650036 ref NC_002951.2 :1009157-1010147 | q1 | q2 | OK     | 179.703 | 74.0431 | -1.27918  | 2.04108  | 0.041243  | 0.468603 |
| gene988 | gene988 | spxA      | gi 57650036 ref NC_002951.2 :1010441-1010837 | q1 | q2 | OK     | 9353.48 | 12049.5 | 0.3654    | -0.35632 | 0.721604  | 0.986963 |
| gene989 | gene989 | SACOL1003 | gi 57650036 ref NC_002951.2 :1011207-1011927 | q1 | q2 | OK     | 115.221 | 109.525 | -0.073144 | 0.14082  | 0.88801   | 0.996932 |
| gene99  | gene99  | SACOL0103 | gi 57650036 ref NC_002951.2 :115668-124110   | q1 | q2 | OK     | 40.1679 | 47.7631 | 0.249855  | -0.11621 | 0.907487  | 0.996932 |
| gene990 | gene990 | SACOL1004 | gi 57650036 ref NC_002951.2 :1012047-1013034 | q1 | q2 | OK     | 23.7468 | 34.8577 | 0.553748  | -1.14015 | 0.254225  | 0.875983 |
| gene991 | gene991 | pepF      | gi 57650036 ref NC_002951.2 :1013081-1014890 | q1 | q2 | OK     | 44.7624 | 90.7519 | 1.01964   | -1.59832 | 0.109973  | 0.715393 |
| gene992 | gene992 | SACOL1006 | gi 57650036 ref NC_002951.2 :1015349-1016156 | q1 | q2 | OK     | 224.38  | 219.453 | -0.032036 | 0.04553  | 0.963686  | 0.996932 |
| gene993 | gene993 | SACOL1007 | gi 57650036 ref NC_002951.2 :1016178-1016544 | q1 | q2 | OK     | 205.612 | 228.612 | 0.152972  | -0.31232 | 0.754796  | 0.986963 |
| gene994 | gene994 | SACOL1008 | gi 57650036 ref NC_002951.2 :1016647-1017241 | q1 | q2 | OK     | 56.0592 | 32.4731 | -0.787708 | 1.59075  | 0.111666  | 0.717934 |

|         |         |           |                                              |    |    |    |         |         |           |         |           |          |
|---------|---------|-----------|----------------------------------------------|----|----|----|---------|---------|-----------|---------|-----------|----------|
| gene995 | gene995 | SACOL1009 | gi 57650036 ref NC_002951.2 :1017426-1017774 | q1 | q2 | OK | 217.902 | 77.55   | -1.49048  | 2.99171 | 0.0027742 | 0.101128 |
| gene996 | gene996 | relA1     | gi 57650036 ref NC_002951.2 :1017790-1018426 | q1 | q2 | OK | 214.956 | 84.0178 | -1.35527  | 2.46189 | 0.0138206 | 0.271122 |
| gene997 | gene997 | ppnK      | gi 57650036 ref NC_002951.2 :1018442-1020103 | q1 | q2 | OK | 224.052 | 104.353 | -1.10236  | 1.3313  | 0.18309   | 0.819812 |
| gene998 | gene998 | SACOL1012 | gi 57650036 ref NC_002951.2 :1018442-1020103 | q1 | q2 | OK | 60.0066 | 51.9299 | -0.208556 | 0.14992 | 0.880827  | 0.996932 |
| gene999 | gene999 | mgtE      | gi 57650036 ref NC_002951.2 :1020123-1021509 | q1 | q2 | OK | 139.457 | 96.9355 | -0.524725 | 0.74025 | 0.459148  | 0.950591 |

---



**Supplementary Table S5. Results of Cuffdiff analysis of RNA-seq data for all annotated MRSA genes in MU30 and M18C06, related to Figure 2b**

| test_id  | gene_id  | gene      | locus                                        | MU30 | M18C06 | status | FPKM(MU30) | FPKM(M18C06) | log2(fold_change) | test_stat | p_value  | q_value  |
|----------|----------|-----------|----------------------------------------------|------|--------|--------|------------|--------------|-------------------|-----------|----------|----------|
| gene0    | gene0    | dnaA      | gi 57650036 ref NC_002951.2 :543-1905        | q1   | q2     | OK     | 104.888    | 53.9253      | -0.959819         | 0.915249  | 0.360061 | 0.93284  |
| gene1    | gene1    | dnaN      | gi 57650036 ref NC_002951.2 :2182-3316       | q1   | q2     | OK     | 188.875    | 68.848       | -1.45594          | 1.37438   | 0.169324 | 0.842707 |
| gene10   | gene10   | SACOL0011 | gi 57650036 ref NC_002951.2 :14748-15770     | q1   | q2     | OK     | 37.8852    | 43.698       | 0.205935          | -0.06464  | 0.948464 | 0.987716 |
| gene100  | gene100  | SACOL0104 | gi 57650036 ref NC_002951.2 :115668-124110   | q1   | q2     | OK     | 0.987995   | 21.0693      | 4.4145            | -0.91095  | 0.362319 | 0.93284  |
| gene1000 | gene1000 | SACOL1014 | gi 57650036 ref NC_002951.2 :1021518-1023363 | q1   | q2     | OK     | 87.2124    | 54.2081      | -0.686025         | 0.673575  | 0.500582 | 0.963286 |
| gene1001 | gene1001 | fabI      | gi 57650036 ref NC_002951.2 :1023640-1024411 | q1   | q2     | OK     | 600.931    | 92.4728      | -2.7001           | 2.32652   | 0.019991 | 0.517412 |
| gene1002 | gene1002 | SACOL1017 | gi 57650036 ref NC_002951.2 :1024605-1025691 | q1   | q2     | OK     | 128.549    | 41.0479      | -1.64694          | 1.37576   | 0.168895 | 0.842707 |
| gene1003 | gene1003 | SACOL1018 | gi 57650036 ref NC_002951.2 :1026032-1027601 | q1   | q2     | OK     | 74.6203    | 64.6954      | -0.205905         | 0.203327  | 0.83888  | 0.984151 |
| gene1004 | gene1004 | SACOL1019 | gi 57650036 ref NC_002951.2 :1027742-1028501 | q1   | q2     | OK     | 27.5283    | 69.2864      | 1.33166           | -0.86988  | 0.384366 | 0.940893 |
| gene1005 | gene1005 | SACOL1020 | gi 57650036 ref NC_002951.2 :1028694-1029204 | q1   | q2     | OK     | 1033.21    | 379.528      | -1.44486          | 1.3359    | 0.181583 | 0.842707 |
| gene1006 | gene1006 | SACOL1021 | gi 57650036 ref NC_002951.2 :1029316-1031660 | q1   | q2     | OK     | 92.9578    | 44.6311      | -1.05853          | 0.549154  | 0.5829   | 0.978191 |
| gene1007 | gene1007 | ypfP      | gi 57650036 ref NC_002951.2 :1029316-1031660 | q1   | q2     | OK     | 203.422    | 99.8626      | -1.02646          | 0.785641  | 0.432078 | 0.956269 |
| gene1008 | gene1008 | murE      | gi 57650036 ref NC_002951.2 :1032092-1035380 | q1   | q2     | OK     | 56.0151    | 51.5468      | -0.119934         | 0.073423  | 0.94147  | 0.987716 |
| gene1009 | gene1009 | SACOL1024 | gi 57650036 ref NC_002951.2 :1032092-1035380 | q1   | q2     | OK     | 74.8615    | 71.5134      | -0.0660101        | 0.010247  | 0.991824 | 0.997969 |
| gene101  | gene101  | SACOL0105 | gi 57650036 ref NC_002951.2 :115668-124110   | q1   | q2     | OK     | 5.21858    | 35.2726      | 2.75682           | -1.12469  | 0.26072  | 0.898005 |
| gene1010 | gene1010 | prfC      | gi 57650036 ref NC_002951.2 :1032092-1035380 | q1   | q2     | OK     | 86.118     | 55.2569      | -0.64016          | 0.459403  | 0.645945 | 0.978191 |
| gene1011 | gene1011 | SACOL1026 | gi 57650036 ref NC_002951.2 :1035681-1036485 | q1   | q2     | OK     | 69.5573    | 36.0447      | -0.948415         | 0.652076  | 0.514352 | 0.963286 |
| gene1012 | gene1012 | SACOL1027 | gi 57650036 ref NC_002951.2 :1036543-1036639 | q1   | q2     | NOTEST | 0          | 0            | 0                 | 0         | 1        | 1        |
| gene1013 | gene1013 | htrA      | gi 57650036 ref NC_002951.2 :1036718-1039028 | q1   | q2     | OK     | 31.4305    | 44.4448      | 0.49985           | -0.47865  | 0.63219  | 0.978191 |
| gene1014 | gene1014 | SACOL1030 | gi 57650036 ref NC_002951.2 :1039044-1040403 | q1   | q2     | OK     | 131.504    | 44.7231      | -1.55601          | 1.41686   | 0.156522 | 0.842707 |
| gene1015 | gene1015 | SACOL1031 | gi 57650036 ref NC_002951.2 :1040541-1042053 | q1   | q2     | OK     | 61.6741    | 56.0258      | -0.138572         | 0.133649  | 0.89368  | 0.984151 |
| gene1018 | gene1018 | SACOL1032 | gi 57650036 ref NC_002951.2 :1042539-1043070 | q1   | q2     | OK     | 6.25216    | 34.573       | 2.46722           | -1.23492  | 0.216862 | 0.850298 |
| gene1019 | gene1019 | SACOL1033 | gi 57650036 ref NC_002951.2 :1043318-1043537 | q1   | q2     | OK     | 1598.2     | 1612.39      | 0.0127544         | -0.01147  | 0.990846 | 0.997969 |
| gene102  | gene102  | SACOL0106 | gi 57650036 ref NC_002951.2 :115668-124110   | q1   | q2     | OK     | 8.49165    | 58.3007      | 2.7794            | -0.87344  | 0.382425 | 0.940893 |
| gene1020 | gene1020 | SACOL1034 | gi 57650036 ref NC_002951.2 :1043617-1044604 | q1   | q2     | OK     | 65.7544    | 56.87        | -0.20942          | 0.172465  | 0.863072 | 0.984151 |
| gene1021 | gene1021 | SACOL1035 | gi 57650036 ref NC_002951.2 :1044802-1044979 | q1   | q2     | OK     | 267.9      | 125.531      | -1.09365          | 0.50918   | 0.610626 | 0.978191 |
| gene1022 | gene1022 | SACOL1036 | gi 57650036 ref NC_002951.2 :1044993-1045596 | q1   | q2     | OK     | 626.612    | 146.019      | -2.10141          | 1.91371   | 0.055657 | 0.696046 |
| gene1023 | gene1023 | SACOL1037 | gi 57650036 ref NC_002951.2 :1045867-1045975 | q1   | q2     | OK     | 2554       | 559.258      | -2.19117          | 0.875555  | 0.381272 | 0.940893 |
| gene1024 | gene1024 | SACOL1038 | gi 57650036 ref NC_002951.2 :1046940-1048905 | q1   | q2     | OK     | 2.08526    | 32.6585      | 3.96916           | -2.38339  | 0.017154 | 0.500083 |

|          |          |           |                                              |    |    |          |         |         |           |          |          |          |
|----------|----------|-----------|----------------------------------------------|----|----|----------|---------|---------|-----------|----------|----------|----------|
| gene1025 | gene1025 | SACOL1039 | gi 57650036 ref NC_002951.2 :1048907-1049866 | q1 | q2 | OK       | 2.03321 | 28.9849 | 3.83347   | -0.69761 | 0.485422 | 0.962734 |
| gene1026 | gene1026 | SACOL1040 | gi 57650036 ref NC_002951.2 :1048907-1049866 | q1 | q2 | OK       | 4.59471 | 31.968  | 2.79858   | -1.33162 | 0.182983 | 0.842707 |
| gene1027 | gene1027 | SACOL1041 | gi 57650036 ref NC_002951.2 :1049953-1050244 | q1 | q2 | OK       | 47.3145 | 21.38   | -1.14602  | 0.542775 | 0.587285 | 0.978191 |
| gene1028 | gene1028 | SACOL1042 | gi 57650036 ref NC_002951.2 :1050522-1050810 | q1 | q2 | OK       | 21.6119 | 27.9727 | 0.372197  | -0.17175 | 0.863632 | 0.984151 |
| gene1029 | gene1029 | SACOL1043 | gi 57650036 ref NC_002951.2 :1050815-1052297 | q1 | q2 | OK       | 76.2145 | 28.7003 | -1.409    | 1.17766  | 0.238931 | 0.879153 |
| gene103  | gene103  | SACOL0107 | gi 57650036 ref NC_002951.2 :115668-124110   | q1 | q2 | OK       | 6.9791  | 34.4774 | 2.30454   | -0.80709 | 0.419613 | 0.949284 |
| gene1030 | gene1030 | SACOL1044 | gi 57650036 ref NC_002951.2 :1052385-1052742 | q1 | q2 | OK       | 57.6981 | 31.4984 | -0.873245 | 0.451177 | 0.651862 | 0.978191 |
| gene1031 | gene1031 | SACOL1045 | gi 57650036 ref NC_002951.2 :1053218-1054178 | q1 | q2 | OK       | 8.41189 | 47.1578 | 2.487     | -1.47658 | 0.13979  | 0.842707 |
| gene1032 | gene1032 | SACOL1046 | gi 57650036 ref NC_002951.2 :1054223-1054355 | q1 | q2 | OK       | 1233.14 | 144.697 | -3.09124  | 1.29943  | 0.193798 | 0.842707 |
| gene1033 | gene1033 | SACOL1047 | gi 57650036 ref NC_002951.2 :1054418-1054709 | q1 | q2 | OK       | 81.486  | 94.2664 | 0.210191  | -0.11187 | 0.910925 | 0.984151 |
| gene1034 | gene1034 | SACOL1048 | gi 57650036 ref NC_002951.2 :1054852-1055350 | q1 | q2 | OK       | 38.8963 | 95.1425 | 1.29046   | -0.78231 | 0.434031 | 0.956269 |
| gene1035 | gene1035 | menA      | gi 57650036 ref NC_002951.2 :1055401-1056340 | q1 | q2 | OK       | 104.503 | 53.0764 | -0.977399 | 0.824347 | 0.409743 | 0.940909 |
| gene1036 | gene1036 | SACOL1050 | gi 57650036 ref NC_002951.2 :1056490-1056595 | q1 | q2 | NOTEST 0 |         | 0       | 0         | 0        | 1        | 1        |
| gene1037 | gene1037 | SACOL1051 | gi 57650036 ref NC_002951.2 :1056671-1061147 | q1 | q2 | OK       | 38.6839 | 56.9599 | 0.558214  | -0.15794 | 0.874506 | 0.984151 |
| gene1038 | gene1038 | menD      | gi 57650036 ref NC_002951.2 :1056671-1061147 | q1 | q2 | OK       | 50.6619 | 75.8661 | 0.582556  | -0.22863 | 0.819159 | 0.984151 |
| gene1039 | gene1039 | SACOL1053 | gi 57650036 ref NC_002951.2 :1056671-1061147 | q1 | q2 | OK       | 51.892  | 63.0783 | 0.281631  | -0.06901 | 0.944984 | 0.987716 |
| gene104  | gene104  | SACOL0108 | gi 57650036 ref NC_002951.2 :124113-124878   | q1 | q2 | OK       | 6.31263 | 62.4047 | 3.30534   | -1.87321 | 0.06104  | 0.708721 |
| gene1040 | gene1040 | menB      | gi 57650036 ref NC_002951.2 :1056671-1061147 | q1 | q2 | OK       | 509.736 | 152.843 | -1.7377   | 0.965792 | 0.334148 | 0.927653 |
| gene1041 | gene1041 | sspC      | gi 57650036 ref NC_002951.2 :1061385-1061715 | q1 | q2 | OK       | 18.9426 | 24.3563 | 0.362661  | -0.17055 | 0.864577 | 0.984151 |
| gene1042 | gene1042 | sspB1     | gi 57650036 ref NC_002951.2 :1061752-1062934 | q1 | q2 | OK       | 8.69216 | 29.0706 | 1.74178   | -1.02901 | 0.303477 | 0.927653 |
| gene1043 | gene1043 | sspA      | gi 57650036 ref NC_002951.2 :1063015-1064026 | q1 | q2 | OK       | 4.34044 | 45.1471 | 3.37872   | -1.92173 | 0.05464  | 0.696046 |
| gene1044 | gene1044 | SACOL1058 | gi 57650036 ref NC_002951.2 :1064553-1065708 | q1 | q2 | OK       | 76.1398 | 50.6294 | -0.588674 | 0.521511 | 0.602011 | 0.978191 |
| gene1045 | gene1045 | SACOL1059 | gi 57650036 ref NC_002951.2 :1065903-1066914 | q1 | q2 | OK       | 63.479  | 30.8633 | -1.04039  | 0.756647 | 0.449261 | 0.956269 |
| gene1046 | gene1046 | SACOL1060 | gi 57650036 ref NC_002951.2 :1067066-1067486 | q1 | q2 | OK       | 31.3781 | 22.2549 | -0.495634 | 0.251576 | 0.801369 | 0.984151 |
| gene1047 | gene1047 | atl       | gi 57650036 ref NC_002951.2 :1067692-1071463 | q1 | q2 | OK       | 905.626 | 268.466 | -1.75418  | 1.28156  | 0.199998 | 0.842707 |
| gene1048 | gene1048 | SACOL1063 | gi 57650036 ref NC_002951.2 :1071690-1072125 | q1 | q2 | OK       | 36.2474 | 29.3053 | -0.306718 | 0.161243 | 0.871902 | 0.984151 |
| gene1049 | gene1049 | SACOL1064 | gi 57650036 ref NC_002951.2 :1072279-1072750 | q1 | q2 | OK       | 1460.59 | 210.301 | -2.79602  | 2.43272  | 0.014986 | 0.500083 |
| gene105  | gene105  | SACOL0109 | gi 57650036 ref NC_002951.2 :125073-125481   | q1 | q2 | NOTEST 0 |         | 0       | 0         | 0        | 1        | 1        |
| gene1050 | gene1050 | SACOL1065 | gi 57650036 ref NC_002951.2 :1072797-1074015 | q1 | q2 | OK       | 329.944 | 189.378 | -0.800949 | 0.716706 | 0.473556 | 0.956269 |
| gene1051 | gene1051 | SACOL1066 | gi 57650036 ref NC_002951.2 :1074465-1075659 | q1 | q2 | OK       | 64.275  | 33.5307 | -0.938773 | 0.744261 | 0.456718 | 0.956269 |
| gene1052 | gene1052 | qoxD      | gi 57650036 ref NC_002951.2 :1076195-1076474 | q1 | q2 | OK       | 3956.05 | 202.786 | -4.28603  | 3.04759  | 0.002307 | 0.338293 |
| gene1053 | gene1053 | qoxC      | gi 57650036 ref NC_002951.2 :1076482-1080166 | q1 | q2 | OK       | 1112.13 | 251.29  | -2.1459   | 0.563637 | 0.573001 | 0.976548 |
| gene1054 | gene1054 | qoxA      | gi 57650036 ref NC_002951.2 :1076482-1080166 | q1 | q2 | OK       | 935.896 | 315.813 | -1.56728  | 0.884201 | 0.376588 | 0.940261 |

|          |          |           |                                              |    |    |          |         |         |            |          |          |          |
|----------|----------|-----------|----------------------------------------------|----|----|----------|---------|---------|------------|----------|----------|----------|
| gene1055 | gene1055 | qoxB      | gi 57650036 ref NC_002951.2 :1076482-1080166 | q1 | q2 | OK       | 763.463 | 317.728 | -1.26477   | 0.479503 | 0.631581 | 0.978191 |
| gene1056 | gene1056 | SACOL1071 | gi 57650036 ref NC_002951.2 :1080737-1081055 | q1 | q2 | OK       | 179.149 | 49.1139 | -1.86695   | 1.03828  | 0.299139 | 0.924214 |
| gene1057 | gene1057 | fold      | gi 57650036 ref NC_002951.2 :1081860-1082721 | q1 | q2 | OK       | 396.444 | 214.136 | -0.888586  | 0.831888 | 0.405472 | 0.940909 |
| gene1058 | gene1058 | purE      | gi 57650036 ref NC_002951.2 :1082921-1084515 | q1 | q2 | OK       | 32.0831 | 61.2028 | 0.931784   | -0.33464 | 0.737894 | 0.978191 |
| gene1059 | gene1059 | purK      | gi 57650036 ref NC_002951.2 :1082921-1084515 | q1 | q2 | OK       | 62.7969 | 103.698 | 0.72362    | -0.63302 | 0.526723 | 0.963286 |
| gene106  | gene106  | SACOL0110 | gi 57650036 ref NC_002951.2 :125530-126157   | q1 | q2 | OK       | 5.29505 | 29.2432 | 2.46538    | -1.24687 | 0.212446 | 0.848911 |
| gene1060 | gene1060 | purC      | gi 57650036 ref NC_002951.2 :1084518-1085486 | q1 | q2 | OK       | 74.1    | 73.2134 | -0.0173666 | 0.012512 | 0.990017 | 0.997969 |
| gene1061 | gene1061 | purS      | gi 57650036 ref NC_002951.2 :1084518-1085486 | q1 | q2 | OK       | 312.415 | 82.1262 | -1.92755   | 0.726529 | 0.467515 | 0.956269 |
| gene1062 | gene1062 | purQ      | gi 57650036 ref NC_002951.2 :1085487-1090825 | q1 | q2 | OK       | 169.11  | 126.725 | -0.416264  | 0.094707 | 0.924548 | 0.986264 |
| gene1063 | gene1063 | purL      | gi 57650036 ref NC_002951.2 :1085487-1090825 | q1 | q2 | OK       | 263.312 | 75.5734 | -1.80083   | 0.918026 | 0.358606 | 0.93284  |
| gene1064 | gene1064 | purF      | gi 57650036 ref NC_002951.2 :1085487-1090825 | q1 | q2 | OK       | 267.048 | 56.4573 | -2.24187   | 0.862898 | 0.388193 | 0.940909 |
| gene1065 | gene1065 | purM      | gi 57650036 ref NC_002951.2 :1085487-1090825 | q1 | q2 | OK       | 393.048 | 67.6534 | -2.53847   | 0.902959 | 0.366548 | 0.93284  |
| gene1066 | gene1066 | purN      | gi 57650036 ref NC_002951.2 :1090827-1091394 | q1 | q2 | OK       | 297.926 | 43.7036 | -2.76913   | 1.99881  | 0.045629 | 0.650761 |
| gene1067 | gene1067 | purH      | gi 57650036 ref NC_002951.2 :1091408-1092887 | q1 | q2 | OK       | 206.39  | 47.9174 | -2.10675   | 1.90623  | 0.056621 | 0.696046 |
| gene1068 | gene1068 | purD      | gi 57650036 ref NC_002951.2 :1092908-1094156 | q1 | q2 | OK       | 367.823 | 56.3242 | -2.70718   | 2.34167  | 0.019198 | 0.51462  |
| gene1069 | gene1069 | SACOL1084 | gi 57650036 ref NC_002951.2 :1094420-1096620 | q1 | q2 | OK       | 18.6729 | 24.0272 | 0.363718   | -0.1518  | 0.879345 | 0.984151 |
| gene107  | gene107  | SACOL0111 | gi 57650036 ref NC_002951.2 :126368-127145   | q1 | q2 | OK       | 973.838 | 571.454 | -0.769044  | 0.626648 | 0.53089  | 0.963286 |
| gene1070 | gene1070 | SACOL1085 | gi 57650036 ref NC_002951.2 :1094420-1096620 | q1 | q2 | OK       | 19.9562 | 46.3896 | 1.21696    | -0.80416 | 0.421305 | 0.949284 |
| gene1071 | gene1071 | SACOL1086 | gi 57650036 ref NC_002951.2 :1096634-1097210 | q1 | q2 | OK       | 18.1832 | 24.1718 | 0.410725   | -0.21699 | 0.82822  | 0.984151 |
| gene1072 | gene1072 | SACOL1087 | gi 57650036 ref NC_002951.2 :1097856-1097991 | q1 | q2 | OK       | 1236.03 | 524.788 | -1.23591   | 0.55718  | 0.577404 | 0.976548 |
| gene1073 | gene1073 | SACOL1088 | gi 57650036 ref NC_002951.2 :1098142-1099438 | q1 | q2 | OK       | 731.402 | 120.032 | -2.60724   | 2.20415  | 0.027514 | 0.604847 |
| gene1074 | gene1074 | SACOL1089 | gi 57650036 ref NC_002951.2 :1099862-1101035 | q1 | q2 | OK       | 31.0484 | 52.4827 | 0.757321   | -0.56743 | 0.57042  | 0.976548 |
| gene1075 | gene1075 | SACOL1090 | gi 57650036 ref NC_002951.2 :1101088-1101631 | q1 | q2 | OK       | 351.036 | 260.923 | -0.427994  | 0.423538 | 0.671903 | 0.978191 |
| gene1076 | gene1076 | ptsH      | gi 57650036 ref NC_002951.2 :1101784-1102051 | q1 | q2 | OK       | 933.981 | 565.3   | -0.724377  | 0.624443 | 0.532336 | 0.963286 |
| gene1077 | gene1077 | ptsI      | gi 57650036 ref NC_002951.2 :1102053-1103772 | q1 | q2 | OK       | 1179.58 | 483.052 | -1.28802   | 0.951687 | 0.341256 | 0.93284  |
| gene1078 | gene1078 | SACOL1093 | gi 57650036 ref NC_002951.2 :1104008-1104242 | q1 | q2 | OK       | 34.9579 | 25.2479 | -0.469457  | 0.208559 | 0.834793 | 0.984151 |
| gene1079 | gene1079 | cydA      | gi 57650036 ref NC_002951.2 :1104439-1106817 | q1 | q2 | OK       | 12.0087 | 35.4725 | 1.56262    | -0.8261  | 0.408747 | 0.940909 |
| gene108  | gene108  | SACOL0112 | gi 57650036 ref NC_002951.2 :127288-127411   | q1 | q2 | NOTEST 0 |         | 0       | 0          | 0        | 1        | 1        |
| gene1080 | gene1080 | cydB      | gi 57650036 ref NC_002951.2 :1104439-1106817 | q1 | q2 | OK       | 10.9967 | 66.4881 | 2.59603    | -1.28035 | 0.200422 | 0.842707 |
| gene1081 | gene1081 | SACOL1096 | gi 57650036 ref NC_002951.2 :1106949-1107612 | q1 | q2 | OK       | 73.8909 | 105.347 | 0.511679   | -0.38912 | 0.697189 | 0.978191 |
| gene1082 | gene1082 | SACOL1097 | gi 57650036 ref NC_002951.2 :1107647-1107827 | q1 | q2 | OK       | 214.288 | 175.695 | -0.286477  | 0.135093 | 0.892538 | 0.984151 |
| gene1083 | gene1083 | SACOL1098 | gi 57650036 ref NC_002951.2 :1107960-1109876 | q1 | q2 | OK       | 418.256 | 187.324 | -1.15885   | 0.885436 | 0.375921 | 0.940261 |
| gene1084 | gene1084 | SACOL1099 | gi 57650036 ref NC_002951.2 :1107960-1109876 | q1 | q2 | OK       | 252.68  | 350.962 | 0.474005   | -0.05469 | 0.956382 | 0.98956  |

|          |          |           |                                              |    |    |    |          |         |             |           |          |          |
|----------|----------|-----------|----------------------------------------------|----|----|----|----------|---------|-------------|-----------|----------|----------|
| gene1085 | gene1085 | def       | gi 57650036 ref NC_002951.2 :1110356-1110908 | q1 | q2 | OK | 130.069  | 43.1903 | -1.5905     | 1.05964   | 0.289307 | 0.921417 |
| gene1086 | gene1086 | SACOL1101 | gi 57650036 ref NC_002951.2 :1111272-1111899 | q1 | q2 | OK | 308.172  | 109.603 | -1.49145    | 1.34037   | 0.180124 | 0.842707 |
| gene1087 | gene1087 | pdhA      | gi 57650036 ref NC_002951.2 :1112069-1113182 | q1 | q2 | OK | 732.748  | 290.579 | -1.33439    | 1.09549   | 0.273303 | 0.906044 |
| gene1088 | gene1088 | pdhB      | gi 57650036 ref NC_002951.2 :1113185-1114163 | q1 | q2 | OK | 645.002  | 340.3   | -0.922499   | 0.773636  | 0.439146 | 0.956269 |
| gene1089 | gene1089 | pdhC      | gi 57650036 ref NC_002951.2 :1114253-1115546 | q1 | q2 | OK | 728.46   | 418.061 | -0.801137   | 0.622177  | 0.533826 | 0.963286 |
| gene109  | gene109  | SACOL0113 | gi 57650036 ref NC_002951.2 :127489-129116   | q1 | q2 | OK | 1.42707  | 30.916  | 4.43722     | -1.91629  | 0.055328 | 0.696046 |
| gene1090 | gene1090 | pdhD      | gi 57650036 ref NC_002951.2 :1115549-1116956 | q1 | q2 | OK | 1636.24  | 319.512 | -2.35644    | 1.80986   | 0.070318 | 0.754145 |
| gene1091 | gene1091 | SACOL1106 | gi 57650036 ref NC_002951.2 :1117123-1117399 | q1 | q2 | OK | 112.091  | 86.5711 | -0.372707   | 0.197569  | 0.843383 | 0.984151 |
| gene1092 | gene1092 | SACOL1107 | gi 57650036 ref NC_002951.2 :1117542-1118082 | q1 | q2 | OK | 12.8244  | 35.476  | 1.46795     | -0.76846  | 0.442217 | 0.956269 |
| gene1093 | gene1093 | SACOL1108 | gi 57650036 ref NC_002951.2 :1118094-1119979 | q1 | q2 | OK | 18.1394  | 50.7169 | 1.48334     | -0.89222  | 0.372273 | 0.936506 |
| gene1094 | gene1094 | SACOL1109 | gi 57650036 ref NC_002951.2 :1118094-1119979 | q1 | q2 | OK | 18.9655  | 28.8423 | 0.604807    | -0.27186  | 0.785729 | 0.982219 |
| gene1095 | gene1095 | SACOL1110 | gi 57650036 ref NC_002951.2 :1119984-1121867 | q1 | q2 | OK | 30.9623  | 19.7024 | -0.652146   | 0.266534  | 0.789828 | 0.982219 |
| gene1096 | gene1096 | SACOL1111 | gi 57650036 ref NC_002951.2 :1119984-1121867 | q1 | q2 | OK | 84.3967  | 75.8528 | -0.153984   | 0.131435  | 0.895431 | 0.984151 |
| gene1097 | gene1097 | SACOL1112 | gi 57650036 ref NC_002951.2 :1121940-1122960 | q1 | q2 | OK | 705.666  | 407.003 | -0.793945   | 0.644805  | 0.519054 | 0.963286 |
| gene1098 | gene1098 | SACOL1113 | gi 57650036 ref NC_002951.2 :1123242-1123662 | q1 | q2 | OK | 464.18   | 150.443 | -1.62546    | 1.34138   | 0.179796 | 0.842707 |
| gene1099 | gene1099 | SACOL1114 | gi 57650036 ref NC_002951.2 :1123743-1125096 | q1 | q2 | OK | 1337.34  | 459.092 | -1.54252    | 1.16206   | 0.245209 | 0.885853 |
| gene11   | gene11   | SACOL0012 | gi 57650036 ref NC_002951.2 :16111-17101     | q1 | q2 | OK | 4.45937  | 70.1364 | 3.97525     | -2.37007  | 0.017785 | 0.500083 |
| gene110  | gene110  | SACOL0114 | gi 57650036 ref NC_002951.2 :127489-129116   | q1 | q2 | OK | 1.36517  | 28.7734 | 4.39758     | -1.47165  | 0.141116 | 0.842707 |
| gene1100 | gene1100 | SACOL1115 | gi 57650036 ref NC_002951.2 :1125279-1125894 | q1 | q2 | OK | 501.532  | 194.501 | -1.36656    | 1.31097   | 0.189866 | 0.842707 |
| gene1101 | gene1101 | SACOL1116 | gi 57650036 ref NC_002951.2 :1126050-1126878 | q1 | q2 | OK | 322.667  | 240.802 | -0.422203   | 0.403739  | 0.686405 | 0.978191 |
| gene1102 | gene1102 | SACOL1117 | gi 57650036 ref NC_002951.2 :1127031-1127223 | q1 | q2 | OK | 741.562  | 39.0378 | -4.24762    | 2.06292   | 0.03912  | 0.641477 |
| gene1103 | gene1103 | typA      | gi 57650036 ref NC_002951.2 :1127324-1129172 | q1 | q2 | OK | 179.889  | 59.5659 | -1.59454    | 1.47803   | 0.139399 | 0.842707 |
| gene1104 | gene1104 | SACOL1119 | gi 57650036 ref NC_002951.2 :1129311-1129479 | q1 | q2 | OK | 112.958  | 413.793 | 1.87312     | -0.86224  | 0.388558 | 0.940909 |
| gene1105 | gene1105 | SACOL1120 | gi 57650036 ref NC_002951.2 :1129480-1129963 | q1 | q2 | OK | 97.072   | 69.2928 | -0.486349   | 0.308419  | 0.757763 | 0.978191 |
| gene1106 | gene1106 | SACOL1121 | gi 57650036 ref NC_002951.2 :1130103-1130379 | q1 | q2 | OK | 1160.29  | 378.889 | -1.61464    | 1.32577   | 0.184918 | 0.842707 |
| gene1107 | gene1107 | SACOL1122 | gi 57650036 ref NC_002951.2 :1130692-1131919 | q1 | q2 | OK | 285.898  | 75.9684 | -1.91203    | 1.75959   | 0.078478 | 0.758524 |
| gene1108 | gene1108 | pyc       | gi 57650036 ref NC_002951.2 :1132472-1135925 | q1 | q2 | OK | 220.457  | 147.56  | -0.579199   | 0.450616  | 0.652266 | 0.978191 |
| gene1109 | gene1109 | ctaA      | gi 57650036 ref NC_002951.2 :1136064-1137135 | q1 | q2 | OK | 126.035  | 50.8979 | -1.30815    | 1.15448   | 0.248303 | 0.889805 |
| gene111  | gene111  | SACOL0115 | gi 57650036 ref NC_002951.2 :129325-133131   | q1 | q2 | OK | 0.905678 | 21.7864 | 4.58829     | -0.87929  | 0.379243 | 0.940893 |
| gene1110 | gene1110 | ctaB      | gi 57650036 ref NC_002951.2 :1137415-1138327 | q1 | q2 | OK | 215.652  | 68.6568 | -1.65123    | 1.48601   | 0.137275 | 0.842707 |
| gene1111 | gene1111 | SACOL1126 | gi 57650036 ref NC_002951.2 :1138351-1138813 | q1 | q2 | OK | 305.001  | 79.7966 | -1.93442    | 1.43862   | 0.150259 | 0.842707 |
| gene1112 | gene1112 | SACOL1127 | gi 57650036 ref NC_002951.2 :1139024-1139228 | q1 | q2 | OK | 0        | 42.5329 | 1.79769e+30 | 1.79769e+ | 0.184686 | 0.842707 |
| gene1113 | gene1113 | SACOL1128 | gi 57650036 ref NC_002951.2 :1139277-1140177 | q1 | q2 | OK | 69.4749  | 76.8742 | 0.146007    | -0.12328  | 0.901885 | 0.984151 |

|          |          |           |                                              |    |    |          |          |         |           |          |          |          |
|----------|----------|-----------|----------------------------------------------|----|----|----------|----------|---------|-----------|----------|----------|----------|
| gene1114 | gene1114 | SACOL1129 | gi 57650036 ref NC_002951.2 :1140192-1140627 | q1 | q2 | OK       | 144.99   | 82.4734 | -0.813949 | 0.529432 | 0.596505 | 0.978191 |
| gene1115 | gene1115 | SACOL1130 | gi 57650036 ref NC_002951.2 :1140689-1141616 | q1 | q2 | OK       | 133.313  | 62.8735 | -1.08429  | 0.964181 | 0.334955 | 0.927826 |
| gene1116 | gene1116 | SACOL1131 | gi 57650036 ref NC_002951.2 :1141854-1142109 | q1 | q2 | OK       | 38.0176  | 27.2207 | -0.481961 | 0.220782 | 0.825262 | 0.984151 |
| gene1117 | gene1117 | SACOL1132 | gi 57650036 ref NC_002951.2 :1142111-1142501 | q1 | q2 | OK       | 69.8398  | 133.478 | 0.934476  | -0.56623 | 0.571239 | 0.976548 |
| gene1118 | gene1118 | SACOL1133 | gi 57650036 ref NC_002951.2 :1142570-1143113 | q1 | q2 | OK       | 27.4143  | 48.6666 | 0.828005  | -0.46844 | 0.639469 | 0.978191 |
| gene1119 | gene1119 | coaD      | gi 57650036 ref NC_002951.2 :1143114-1143597 | q1 | q2 | OK       | 166.174  | 47.8367 | -1.79651  | 1.18503  | 0.236004 | 0.874233 |
| gene112  | gene112  | SACOL0116 | gi 57650036 ref NC_002951.2 :129325-133131   | q1 | q2 | OK       | 1.89328  | 25.1018 | 3.72883   | -1.04143 | 0.297674 | 0.924214 |
| gene1120 | gene1120 | SACOL1135 | gi 57650036 ref NC_002951.2 :1143658-1144798 | q1 | q2 | OK       | 31.7003  | 39.0636 | 0.301328  | -0.21189 | 0.832194 | 0.984151 |
| gene1121 | gene1121 | SACOL1136 | gi 57650036 ref NC_002951.2 :1144924-1145482 | q1 | q2 | OK       | 271.445  | 82.748  | -1.71386  | 1.36584  | 0.17199  | 0.842707 |
| gene1122 | gene1122 | rpmF      | gi 57650036 ref NC_002951.2 :1145561-1145735 | q1 | q2 | OK       | 6276.17  | 299.573 | -4.38891  | 2.68959  | 0.007154 | 0.480028 |
| gene1123 | gene1123 | isdB      | gi 57650036 ref NC_002951.2 :1145888-1147826 | q1 | q2 | OK       | 3.23945  | 36.4107 | 3.49054   | -2.18925 | 0.028579 | 0.604847 |
| gene1124 | gene1124 | isdA      | gi 57650036 ref NC_002951.2 :1148028-1149081 | q1 | q2 | OK       | 10.3016  | 38.8415 | 1.91473   | -1.15571 | 0.247799 | 0.889805 |
| gene1125 | gene1125 | isdC      | gi 57650036 ref NC_002951.2 :1149289-1151924 | q1 | q2 | OK       | 5.10347  | 19.3861 | 1.92547   | -0.68315 | 0.49451  | 0.963286 |
| gene1126 | gene1126 | isdD      | gi 57650036 ref NC_002951.2 :1149289-1151924 | q1 | q2 | OK       | 1.50179  | 30.5937 | 4.34848   | -1.44474 | 0.14853  | 0.842707 |
| gene1127 | gene1127 | SACOL1143 | gi 57650036 ref NC_002951.2 :1149289-1151924 | q1 | q2 | OK       | 1.95548  | 28.9766 | 3.88929   | -1.25973 | 0.207767 | 0.842707 |
| gene1128 | gene1128 | SACOL1144 | gi 57650036 ref NC_002951.2 :1151936-1152902 | q1 | q2 | OK       | 0.575442 | 30.3436 | 5.72058   | -2.78885 | 0.00529  | 0.446636 |
| gene1129 | gene1129 | srtB      | gi 57650036 ref NC_002951.2 :1152963-1153698 | q1 | q2 | OK       | 0.835367 | 21.9951 | 4.71863   | -2.21033 | 0.027082 | 0.604847 |
| gene113  | gene113  | SACOL0117 | gi 57650036 ref NC_002951.2 :129325-133131   | q1 | q2 | OK       | 9.7302   | 25.7262 | 1.4027    | -0.75847 | 0.448168 | 0.956269 |
| gene1130 | gene1130 | SACOL1146 | gi 57650036 ref NC_002951.2 :1153716-1154040 | q1 | q2 | OK       | 13.8958  | 48.5318 | 1.80428   | -0.86298 | 0.388148 | 0.940909 |
| gene1131 | gene1131 | SACOL1147 | gi 57650036 ref NC_002951.2 :1154423-1155164 | q1 | q2 | OK       | 68.1186  | 48.4369 | -0.491942 | 0.338497 | 0.734988 | 0.978191 |
| gene1132 | gene1132 | pheS      | gi 57650036 ref NC_002951.2 :1155544-1159005 | q1 | q2 | OK       | 36.3081  | 40.6249 | 0.162074  | -0.07293 | 0.941859 | 0.987716 |
| gene1133 | gene1133 | pheT      | gi 57650036 ref NC_002951.2 :1155544-1159005 | q1 | q2 | OK       | 65.7652  | 40.8228 | -0.687949 | 0.575528 | 0.564934 | 0.976548 |
| gene1134 | gene1134 | rnhC      | gi 57650036 ref NC_002951.2 :1159175-1160114 | q1 | q2 | OK       | 11.6446  | 33.941  | 1.54337   | -0.90021 | 0.368009 | 0.93284  |
| gene1135 | gene1135 | SACOL1151 | gi 57650036 ref NC_002951.2 :1160483-1160750 | q1 | q2 | OK       | 142.922  | 88.0181 | -0.699359 | 0.372515 | 0.709509 | 0.978191 |
| gene1136 | gene1136 | SACOL1152 | gi 57650036 ref NC_002951.2 :1160750-1161272 | q1 | q2 | OK       | 145.263  | 42.3389 | -1.77861  | 1.17415  | 0.240336 | 0.879153 |
| gene1137 | gene1137 | SACOL1153 | gi 57650036 ref NC_002951.2 :1161344-1163057 | q1 | q2 | OK       | 86.4801  | 65.856  | -0.393053 | 0.388487 | 0.697655 | 0.978191 |
| gene1138 | gene1138 | SACOL1154 | gi 57650036 ref NC_002951.2 :1163066-1165415 | q1 | q2 | OK       | 78.7927  | 69.4414 | -0.182266 | 0.176392 | 0.859986 | 0.984151 |
| gene1139 | gene1139 | trxA      | gi 57650036 ref NC_002951.2 :1165587-1165902 | q1 | q2 | OK       | 4677.83  | 274.225 | -4.09241  | 3.1213   | 0.001801 | 0.338293 |
| gene114  | gene114  | sodA1     | gi 57650036 ref NC_002951.2 :133398-133998   | q1 | q2 | OK       | 317.221  | 66.8266 | -2.247    | 1.75471  | 0.079309 | 0.758524 |
| gene1140 | gene1140 | SACOL1156 | gi 57650036 ref NC_002951.2 :1165964-1166060 | q1 | q2 | NOTEST 0 |          | 0       | 0         | 0        | 1        | 1        |
| gene1141 | gene1141 | uvrC      | gi 57650036 ref NC_002951.2 :1166225-1168007 | q1 | q2 | OK       | 44.1354  | 62.2882 | 0.497022  | -0.4798  | 0.63137  | 0.978191 |
| gene1142 | gene1142 | sdhC      | gi 57650036 ref NC_002951.2 :1168330-1168945 | q1 | q2 | OK       | 457.873  | 114.844 | -1.99528  | 1.77564  | 0.075793 | 0.755805 |
| gene1143 | gene1143 | sdhA      | gi 57650036 ref NC_002951.2 :1168996-1171578 | q1 | q2 | OK       | 797.038  | 358.131 | -1.15416  | 0.593387 | 0.552922 | 0.976229 |

|          |          |            |                                              |    |    |          |         |         |              |            |          |          |
|----------|----------|------------|----------------------------------------------|----|----|----------|---------|---------|--------------|------------|----------|----------|
| gene1144 | gene1144 | sdhB       | gi 57650036 ref NC_002951.2 :1168996-1171578 | q1 | q2 | OK       | 3077.85 | 485.557 | -2.66421     | 1.30393    | 0.192259 | 0.842707 |
| gene1145 | gene1145 | murI       | gi 57650036 ref NC_002951.2 :1171813-1172614 | q1 | q2 | OK       | 140.947 | 119.422 | -0.239085    | 0.230796   | 0.817473 | 0.984151 |
| gene1146 | gene1146 | SACOL1162  | gi 57650036 ref NC_002951.2 :1172625-1173709 | q1 | q2 | OK       | 196.363 | 171.752 | -0.193201    | 0.117205   | 0.906698 | 0.984151 |
| gene1147 | gene1147 | SACOL1163  | gi 57650036 ref NC_002951.2 :1172625-1173709 | q1 | q2 | OK       | 445.39  | 261.359 | -0.769037    | 0.564545   | 0.572383 | 0.976548 |
| gene1148 | gene1148 | SACOL1164  | gi 57650036 ref NC_002951.2 :1174197-1174527 | q1 | q2 | OK       | 636.471 | 272.934 | -1.22154     | 1.0276     | 0.304139 | 0.927653 |
| gene1149 | gene1149 | SACOL1165  | gi 57650036 ref NC_002951.2 :1174697-1174805 | q1 | q2 | NOTEST 0 |         | 0       | 0            | 0          | 1        | 1        |
| gene115  | gene115  | SACOL0119  | gi 57650036 ref NC_002951.2 :134365-135091   | q1 | q2 | OK       | 15.7311 | 30.3311 | 0.947174     | -0.52895   | 0.596842 | 0.978191 |
| gene1150 | gene1150 | SACOL1166  | gi 57650036 ref NC_002951.2 :1174895-1175297 | q1 | q2 | OK       | 29.6934 | 22.1539 | -0.422582    | 0.211576   | 0.832438 | 0.984151 |
| gene1151 | gene1151 | SACOL1167  | gi 57650036 ref NC_002951.2 :1175968-1176475 | q1 | q2 | OK       | 35.4062 | 25.0799 | -0.497472    | 0.268186   | 0.788556 | 0.982219 |
| gene1152 | gene1152 | efb        | gi 57650036 ref NC_002951.2 :1176733-1177231 | q1 | q2 | OK       | 204.594 | 119.598 | -0.774572    | 0.621101   | 0.534533 | 0.963286 |
| gene1153 | gene1153 | SACOL1169  | gi 57650036 ref NC_002951.2 :1177384-1177735 | q1 | q2 | OK       | 300.583 | 103.5   | -1.53814     | 1.02172    | 0.306916 | 0.927653 |
| gene1154 | gene1154 | SACOL1170  | gi 57650036 ref NC_002951.2 :1178160-1178406 | q1 | q2 | OK       | 16.9782 | 37.2062 | 1.13186      | -0.50305   | 0.614932 | 0.978191 |
| gene1155 | gene1155 | SACOL1171  | gi 57650036 ref NC_002951.2 :1178556-1178742 | q1 | q2 | OK       | 12.9338 | 11.4345 | -0.177745    | 0.071224   | 0.94322  | 0.987716 |
| gene1156 | gene1156 | SACOL1172  | gi 57650036 ref NC_002951.2 :1179363-1179597 | q1 | q2 | OK       | 134.838 | 38.8429 | -1.7955      | 0.864658   | 0.387227 | 0.940893 |
| gene1157 | gene1157 | hly        | gi 57650036 ref NC_002951.2 :1180073-1181033 | q1 | q2 | OK       | 4.64104 | 21.0647 | 2.18231      | -1.15071   | 0.24985  | 0.889805 |
| gene1158 | gene1158 | SACOL1174  | gi 57650036 ref NC_002951.2 :1181705-1182033 | q1 | q2 | OK       | 0       | 22.191  | 1.79769e+30  | 1.79769e+  | 0.343023 | 0.93284  |
| gene1159 | gene1159 | SACOL1175  | gi 57650036 ref NC_002951.2 :1181705-1182033 | q1 | q2 | OK       | 38.3468 | 12.4191 | -1.62654     | 0.595275   | 0.55166  | 0.975381 |
| gene116  | gene116  | SACOL0120  | gi 57650036 ref NC_002951.2 :135282-136038   | q1 | q2 | OK       | 25.2761 | 39.4309 | 0.64155      | -0.38523   | 0.700066 | 0.978191 |
| gene1160 | gene1160 | SACOL1176  | gi 57650036 ref NC_002951.2 :1182064-1182421 | q1 | q2 | OK       | 40.874  | 49.6436 | 0.280425     | -0.1095    | 0.912804 | 0.984151 |
| gene1161 | gene1161 | SACOL1177  | gi 57650036 ref NC_002951.2 :1182064-1182421 | q1 | q2 | OK       | 1079    | 675.25  | -0.676198    | 0.196492   | 0.844225 | 0.984151 |
| gene1162 | gene1162 | SACOL1178  | gi 57650036 ref NC_002951.2 :1182589-1183306 | q1 | q2 | OK       | 3.46337 | 46.6584 | 3.75189      | -1.96202   | 0.049761 | 0.677885 |
| gene1163 | gene1163 | SACOL1179  | gi 57650036 ref NC_002951.2 :1183413-1184139 | q1 | q2 | OK       | 2.97616 | 21.9706 | 2.88405      | -1.42458   | 0.154279 | 0.842707 |
| gene1164 | gene1164 | SACOL1180  | gi 57650036 ref NC_002951.2 :1184233-1184959 | q1 | q2 | OK       | 1.2755  | 30.9144 | 4.59915      | -2.22331   | 0.026195 | 0.604847 |
| gene1165 | gene1165 | arcB1      | gi 57650036 ref NC_002951.2 :1185396-1186398 | q1 | q2 | OK       | 3.56738 | 27.2053 | 2.93095      | -1.5618    | 0.118336 | 0.840838 |
| gene1166 | gene1166 | arcC1      | gi 57650036 ref NC_002951.2 :1186420-1187353 | q1 | q2 | OK       | 6.62431 | 43.6454 | 2.71999      | -1.55688   | 0.1195   | 0.842061 |
| gene1167 | gene1167 | SACOL1183  | gi 57650036 ref NC_002951.2 :1187524-1189081 | q1 | q2 | OK       | 15.6991 | 58.4191 | 1.89575      | -1.40376   | 0.16039  | 0.842707 |
| gene1168 | gene1168 | SACOL1184  | gi 57650036 ref NC_002951.2 :1189920-1190868 | q1 | q2 | OK       | 20.346  | 44.9985 | 1.14513      | -0.73029   | 0.46521  | 0.956269 |
| gene1169 | gene1169 | SACOL1185  | gi 57650036 ref NC_002951.2 :1191116-1191305 | q1 | q2 | OK       | 59.7308 | 15.8386 | -1.91503     | 0.791086   | 0.428894 | 0.954672 |
| gene117  | gene117  | deoD1      | gi 57650036 ref NC_002951.2 :136273-136981   | q1 | q2 | OK       | 2.20482 | 25.1365 | 3.51105      | -1.71462   | 0.086415 | 0.771794 |
| gene1170 | gene1170 | SACOL_tRNA | gi 57650036 ref NC_002951.2 :1191779-1191853 | q1 | q2 | NOTEST 0 |         | 0       | 0            | 0          | 1        | 1        |
| gene1171 | gene1171 | SACOL1186  | gi 57650036 ref NC_002951.2 :1192216-1192351 | q1 | q2 | OK       | 494.412 | 0       | -1.79769e+30 | -1.79769e+ | 0.191951 | 0.842707 |
| gene1172 | gene1172 | SACOL1187  | gi 57650036 ref NC_002951.2 :1192407-1192542 | q1 | q2 | OK       | 618.015 | 40.3683 | -3.93635     | 1.63363    | 0.102337 | 0.815097 |
| gene1173 | gene1173 | SACOL1188  | gi 57650036 ref NC_002951.2 :1192665-1193361 | q1 | q2 | OK       | 85.0072 | 93.0183 | 0.129929     | -0.10268   | 0.918221 | 0.984217 |

|          |          |           |                                              |    |    |    |         |         |           |          |          |          |
|----------|----------|-----------|----------------------------------------------|----|----|----|---------|---------|-----------|----------|----------|----------|
| gene1174 | gene1174 | SACOL1189 | gi 57650036 ref NC_002951.2 :1193469-1193910 | q1 | q2 | OK | 1552.63 | 629.335 | -1.30282  | 1.17438  | 0.240241 | 0.879153 |
| gene1175 | gene1175 | SACOL1190 | gi 57650036 ref NC_002951.2 :1194104-1195718 | q1 | q2 | OK | 127.05  | 129.161 | 0.0237662 | -0.02265 | 0.981927 | 0.997969 |
| gene1176 | gene1176 | mraZ      | gi 57650036 ref NC_002951.2 :1195861-1196293 | q1 | q2 | OK | 809.716 | 120.326 | -2.75047  | 2.1577   | 0.030951 | 0.604847 |
| gene1177 | gene1177 | mraW      | gi 57650036 ref NC_002951.2 :1196308-1197244 | q1 | q2 | OK | 235.072 | 123.123 | -0.933005 | 0.909016 | 0.363342 | 0.93284  |
| gene1178 | gene1178 | SACOL1193 | gi 57650036 ref NC_002951.2 :1197272-1199874 | q1 | q2 | OK | 395.353 | 178.34  | -1.14851  | 0.521353 | 0.602121 | 0.978191 |
| gene1179 | gene1179 | pbp1      | gi 57650036 ref NC_002951.2 :1197272-1199874 | q1 | q2 | OK | 125.525 | 36.7523 | -1.77207  | 1.39809  | 0.162085 | 0.842707 |
| gene118  | gene118  | SACOL0122 | gi 57650036 ref NC_002951.2 :136987-138340   | q1 | q2 | OK | 14.3739 | 28.1629 | 0.970341  | -0.62074 | 0.534772 | 0.963286 |
| gene1180 | gene1180 | mraY      | gi 57650036 ref NC_002951.2 :1200165-1201131 | q1 | q2 | OK | 82.8636 | 31.5574 | -1.39276  | 1.03723  | 0.299627 | 0.924214 |
| gene1181 | gene1181 | murD      | gi 57650036 ref NC_002951.2 :1201132-1202482 | q1 | q2 | OK | 104.678 | 43.8914 | -1.25395  | 1.14255  | 0.253224 | 0.889805 |
| gene1182 | gene1182 | divIB     | gi 57650036 ref NC_002951.2 :1202497-1203817 | q1 | q2 | OK | 144.169 | 70.4996 | -1.03208  | 1.00102  | 0.316817 | 0.927653 |
| gene1183 | gene1183 | ftsA      | gi 57650036 ref NC_002951.2 :1203922-1205335 | q1 | q2 | OK | 607.373 | 268.41  | -1.17814  | 0.94447  | 0.344929 | 0.93284  |
| gene1184 | gene1184 | ftsZ      | gi 57650036 ref NC_002951.2 :1205367-1206540 | q1 | q2 | OK | 1426.43 | 387.326 | -1.88078  | 1.45394  | 0.145962 | 0.842707 |
| gene1185 | gene1185 | SACOL1200 | gi 57650036 ref NC_002951.2 :1206799-1207591 | q1 | q2 | OK | 57.8729 | 53.9183 | -0.102114 | 0.071572 | 0.942943 | 0.987716 |
| gene1186 | gene1186 | SACOL1201 | gi 57650036 ref NC_002951.2 :1207608-1208843 | q1 | q2 | OK | 486.451 | 274.007 | -0.828085 | 0.533617 | 0.593606 | 0.978191 |
| gene1187 | gene1187 | ylmF      | gi 57650036 ref NC_002951.2 :1207608-1208843 | q1 | q2 | OK | 478.117 | 303.068 | -0.657721 | 0.377146 | 0.706065 | 0.978191 |
| gene1188 | gene1188 | ylmG      | gi 57650036 ref NC_002951.2 :1208854-1209145 | q1 | q2 | OK | 1061.95 | 189.505 | -2.48641  | 1.84162  | 0.065531 | 0.73141  |
| gene1189 | gene1189 | ylmH      | gi 57650036 ref NC_002951.2 :1209254-1210034 | q1 | q2 | OK | 195.407 | 133.171 | -0.553202 | 0.542581 | 0.587418 | 0.978191 |
| gene119  | gene119  | deoC1     | gi 57650036 ref NC_002951.2 :138420-139083   | q1 | q2 | OK | 76.3216 | 63.3401 | -0.268971 | 0.186652 | 0.851934 | 0.984151 |
| gene1190 | gene1190 | SACOL1205 | gi 57650036 ref NC_002951.2 :1210057-1210675 | q1 | q2 | OK | 502.592 | 240.723 | -1.06201  | 1.0249   | 0.305408 | 0.927653 |
| gene1191 | gene1191 | ileS      | gi 57650036 ref NC_002951.2 :1210895-1213649 | q1 | q2 | OK | 111.344 | 50.1228 | -1.15148  | 1.06969  | 0.284759 | 0.921417 |
| gene1192 | gene1192 | SACOL1207 | gi 57650036 ref NC_002951.2 :1213938-1214736 | q1 | q2 | OK | 59.4996 | 64.0367 | 0.106019  | -0.07762 | 0.938127 | 0.987716 |
| gene1193 | gene1193 | lspA      | gi 57650036 ref NC_002951.2 :1215559-1216968 | q1 | q2 | OK | 65.2087 | 40.6393 | -0.68219  | 0.306791 | 0.759002 | 0.978191 |
| gene1194 | gene1194 | SACOL1209 | gi 57650036 ref NC_002951.2 :1215559-1216968 | q1 | q2 | OK | 68.2893 | 43.9611 | -0.635431 | 0.463338 | 0.643122 | 0.978191 |
| gene1195 | gene1195 | pyrR      | gi 57650036 ref NC_002951.2 :1217367-1217895 | q1 | q2 | OK | 68.7484 | 54.7572 | -0.328276 | 0.201931 | 0.839971 | 0.984151 |
| gene1196 | gene1196 | uraA      | gi 57650036 ref NC_002951.2 :1218112-1219420 | q1 | q2 | OK | 19.5009 | 52.5702 | 1.4307    | -1.03582 | 0.300286 | 0.924214 |
| gene1197 | gene1197 | pyrB      | gi 57650036 ref NC_002951.2 :1219447-1220329 | q1 | q2 | OK | 36.6604 | 46.6773 | 0.348496  | -0.23298 | 0.815777 | 0.984151 |
| gene1198 | gene1198 | pyrC      | gi 57650036 ref NC_002951.2 :1220346-1221621 | q1 | q2 | OK | 52.8221 | 56.8663 | 0.106432  | -0.09526 | 0.924106 | 0.986264 |
| gene1199 | gene1199 | carA      | gi 57650036 ref NC_002951.2 :1221622-1225889 | q1 | q2 | OK | 47.2295 | 27.8386 | -0.762604 | 0.302552 | 0.762232 | 0.978191 |
| gene12   | gene12   | SACOL0013 | gi 57650036 ref NC_002951.2 :17406-18330     | q1 | q2 | OK | 128.699 | 59.7079 | -1.10801  | 0.969461 | 0.332315 | 0.927653 |
| gene120  | gene120  | deoB      | gi 57650036 ref NC_002951.2 :139110-140289   | q1 | q2 | OK | 158.292 | 88.1107 | -0.845195 | 0.826257 | 0.408658 | 0.940909 |
| gene1200 | gene1200 | carB      | gi 57650036 ref NC_002951.2 :1221622-1225889 | q1 | q2 | OK | 69.1407 | 36.6931 | -0.914024 | 0.761788 | 0.446186 | 0.956269 |
| gene1201 | gene1201 | pyrF      | gi 57650036 ref NC_002951.2 :1225998-1227302 | q1 | q2 | OK | 79.1797 | 36.4324 | -1.11991  | 0.677645 | 0.497997 | 0.963286 |
| gene1202 | gene1202 | pyrE      | gi 57650036 ref NC_002951.2 :1225998-1227302 | q1 | q2 | OK | 47.8458 | 27.8043 | -0.783082 | 0.361816 | 0.71749  | 0.978191 |

|          |          |           |                                              |    |    |          |         |         |           |          |          |          |
|----------|----------|-----------|----------------------------------------------|----|----|----------|---------|---------|-----------|----------|----------|----------|
| gene1203 | gene1203 | SACOL1218 | gi 57650036 ref NC_002951.2 :1227331-1227544 | q1 | q2 | OK       | 534.253 | 175.627 | -1.60501  | 0.881869 | 0.377848 | 0.940261 |
| gene1204 | gene1204 | SACOL1219 | gi 57650036 ref NC_002951.2 :1227980-1228382 | q1 | q2 | OK       | 231.608 | 104.027 | -1.15473  | 0.800405 | 0.423476 | 0.949436 |
| gene1205 | gene1205 | SACOL1220 | gi 57650036 ref NC_002951.2 :1228644-1230342 | q1 | q2 | OK       | 113.148 | 77.1046 | -0.55332  | 0.54019  | 0.589066 | 0.978191 |
| gene1206 | gene1206 | gmk       | gi 57650036 ref NC_002951.2 :1230616-1231458 | q1 | q2 | OK       | 241.663 | 143.859 | -0.748342 | 0.638183 | 0.523354 | 0.963286 |
| gene1207 | gene1207 | rpoZ      | gi 57650036 ref NC_002951.2 :1230616-1231458 | q1 | q2 | OK       | 871.745 | 300.098 | -1.53847  | 0.656881 | 0.511258 | 0.963286 |
| gene1208 | gene1208 | coaBC     | gi 57650036 ref NC_002951.2 :1231667-1235281 | q1 | q2 | OK       | 44.3559 | 64.2104 | 0.533681  | -0.22193 | 0.824367 | 0.984151 |
| gene1209 | gene1209 | priA      | gi 57650036 ref NC_002951.2 :1231667-1235281 | q1 | q2 | OK       | 93.3433 | 81.7103 | -0.192029 | 0.151546 | 0.879545 | 0.984151 |
| gene121  | gene121  | SACOL0125 | gi 57650036 ref NC_002951.2 :140419-142032   | q1 | q2 | OK       | 6.12975 | 36.1958 | 2.56192   | -1.22886 | 0.219125 | 0.850902 |
| gene1210 | gene1210 | SACOL1225 | gi 57650036 ref NC_002951.2 :1235786-1236740 | q1 | q2 | OK       | 46.7917 | 54.6465 | 0.223877  | -0.16621 | 0.867993 | 0.984151 |
| gene1211 | gene1211 | SACOL1226 | gi 57650036 ref NC_002951.2 :1236902-1237181 | q1 | q2 | OK       | 5967.89 | 1477.28 | -2.01428  | 1.77849  | 0.075324 | 0.754145 |
| gene1212 | gene1212 | def2      | gi 57650036 ref NC_002951.2 :1237404-1240125 | q1 | q2 | OK       | 91.675  | 66.9011 | -0.454498 | 0.147384 | 0.882829 | 0.984151 |
| gene1213 | gene1213 | fnt       | gi 57650036 ref NC_002951.2 :1237404-1240125 | q1 | q2 | OK       | 109.141 | 63.6649 | -0.777619 | 0.424845 | 0.670949 | 0.978191 |
| gene1214 | gene1214 | sun       | gi 57650036 ref NC_002951.2 :1237404-1240125 | q1 | q2 | OK       | 134.931 | 54.4477 | -1.30928  | 0.897039 | 0.369698 | 0.932852 |
| gene1215 | gene1215 | SACOL1230 | gi 57650036 ref NC_002951.2 :1240127-1241222 | q1 | q2 | OK       | 149.528 | 50.6011 | -1.56317  | 1.38365  | 0.166466 | 0.842707 |
| gene1216 | gene1216 | SACOL1231 | gi 57650036 ref NC_002951.2 :1241228-1243963 | q1 | q2 | OK       | 130.937 | 59.4698 | -1.13864  | 0.431786 | 0.665897 | 0.978191 |
| gene1217 | gene1217 | SACOL1232 | gi 57650036 ref NC_002951.2 :1241228-1243963 | q1 | q2 | OK       | 216.692 | 48.0894 | -2.17185  | 1.7098   | 0.087303 | 0.771794 |
| gene1218 | gene1218 | SACOL1234 | gi 57650036 ref NC_002951.2 :1244190-1245066 | q1 | q2 | OK       | 83.8176 | 65.5175 | -0.355372 | 0.297151 | 0.766351 | 0.978191 |
| gene1219 | gene1219 | rpe       | gi 57650036 ref NC_002951.2 :1245066-1245711 | q1 | q2 | OK       | 89.7194 | 44.0992 | -1.02467  | 0.68805  | 0.491421 | 0.963286 |
| gene122  | gene122  | SACOL0126 | gi 57650036 ref NC_002951.2 :140419-142032   | q1 | q2 | OK       | 2.58958 | 37.4155 | 3.85285   | -1.33217 | 0.182804 | 0.842707 |
| gene1220 | gene1220 | SACOL1236 | gi 57650036 ref NC_002951.2 :1245717-1246359 | q1 | q2 | OK       | 93.4258 | 83.4848 | -0.162306 | 0.121594 | 0.903221 | 0.984151 |
| gene1221 | gene1221 | rpmB      | gi 57650036 ref NC_002951.2 :1246739-1246928 | q1 | q2 | OK       | 41441.2 | 1520.51 | -4.76844  | 3.41754  | 0.000632 | 0.281629 |
| gene1222 | gene1222 | SACOL1239 | gi 57650036 ref NC_002951.2 :1247370-1247745 | q1 | q2 | OK       | 183.257 | 131.795 | -0.475577 | 0.312993 | 0.754286 | 0.978191 |
| gene1223 | gene1223 | SACOL1240 | gi 57650036 ref NC_002951.2 :1247759-1249406 | q1 | q2 | OK       | 181.58  | 68.5357 | -1.40568  | 1.3213   | 0.186401 | 0.842707 |
| gene1224 | gene1224 | recG      | gi 57650036 ref NC_002951.2 :1249595-1251656 | q1 | q2 | OK       | 82.3077 | 67.9966 | -0.275564 | 0.269949 | 0.7872   | 0.982219 |
| gene1225 | gene1225 | SACOL1242 | gi 57650036 ref NC_002951.2 :1251858-1252431 | q1 | q2 | OK       | 156.494 | 113.669 | -0.46127  | 0.383489 | 0.701357 | 0.978191 |
| gene1226 | gene1226 | plsX      | gi 57650036 ref NC_002951.2 :1252435-1255068 | q1 | q2 | OK       | 120.317 | 83.6633 | -0.524169 | 0.266024 | 0.790221 | 0.982219 |
| gene1227 | gene1227 | fabD      | gi 57650036 ref NC_002951.2 :1252435-1255068 | q1 | q2 | OK       | 139.082 | 68.9763 | -1.01177  | 0.494889 | 0.620679 | 0.978191 |
| gene1228 | gene1228 | fabG1     | gi 57650036 ref NC_002951.2 :1252435-1255068 | q1 | q2 | OK       | 269.824 | 105.385 | -1.35634  | 0.747836 | 0.454559 | 0.956269 |
| gene1229 | gene1229 | SACOL1246 | gi 57650036 ref NC_002951.2 :1255190-1255289 | q1 | q2 | NOTEST 0 |         | 0       | 0         | 0        | 1        | 1        |
| gene123  | gene123  | SACOL0127 | gi 57650036 ref NC_002951.2 :142033-142807   | q1 | q2 | OK       | 2.71661 | 29.4769 | 3.4397    | -1.73993 | 0.081872 | 0.761588 |
| gene1230 | gene1230 | acpP      | gi 57650036 ref NC_002951.2 :1255310-1255544 | q1 | q2 | OK       | 2561.92 | 147.603 | -4.11743  | 2.7226   | 0.006477 | 0.461354 |
| gene1231 | gene1231 | rnc       | gi 57650036 ref NC_002951.2 :1255659-1256391 | q1 | q2 | OK       | 54.1991 | 107.499 | 0.987986  | -0.74542 | 0.456015 | 0.956269 |
| gene1232 | gene1232 | SACOL1250 | gi 57650036 ref NC_002951.2 :1256537-1261673 | q1 | q2 | OK       | 50.9191 | 39.8926 | -0.352088 | 0.273826 | 0.784218 | 0.982219 |



|          |          |           |                                              |    |    |    |         |         |             |           |          |          |
|----------|----------|-----------|----------------------------------------------|----|----|----|---------|---------|-------------|-----------|----------|----------|
| gene1233 | gene1233 | SACOL1251 | gi 57650036 ref NC_002951.2 :1256537-1261673 | q1 | q2 | OK | 56.7588 | 53.2984 | -0.0907502  | 0.043418  | 0.965368 | 0.990396 |
| gene1234 | gene1234 | SACOL1252 | gi 57650036 ref NC_002951.2 :1256537-1261673 | q1 | q2 | OK | 46.2836 | 41.4251 | -0.159999   | 0.024067  | 0.980799 | 0.997969 |
| gene1235 | gene1235 | ffh       | gi 57650036 ref NC_002951.2 :1261698-1263066 | q1 | q2 | OK | 205.317 | 116.217 | -0.821031   | 0.776115  | 0.437681 | 0.956269 |
| gene1236 | gene1236 | rpsP      | gi 57650036 ref NC_002951.2 :1263500-1263776 | q1 | q2 | OK | 199.945 | 40.4748 | -2.30451    | 1.21037   | 0.226138 | 0.855481 |
| gene1237 | gene1237 | rimM      | gi 57650036 ref NC_002951.2 :1263963-1265204 | q1 | q2 | OK | 9.89756 | 30.2453 | 1.61157     | -0.54447  | 0.586117 | 0.978191 |
| gene1238 | gene1238 | trmD      | gi 57650036 ref NC_002951.2 :1263963-1265204 | q1 | q2 | OK | 10.7964 | 44.1331 | 2.0313      | -0.9939   | 0.320272 | 0.927653 |
| gene1239 | gene1239 | rplS      | gi 57650036 ref NC_002951.2 :1265306-1265657 | q1 | q2 | OK | 2204.82 | 100.991 | -4.44837    | 3.10244   | 0.001919 | 0.338293 |
| gene124  | gene124  | SACOL0128 | gi 57650036 ref NC_002951.2 :143020-143977   | q1 | q2 | OK | 8.4463  | 30.5599 | 1.85525     | -1.04881  | 0.294266 | 0.924214 |
| gene1240 | gene1240 | SACOL1259 | gi 57650036 ref NC_002951.2 :1265900-1268507 | q1 | q2 | OK | 20.4338 | 46.8872 | 1.19824     | -1.07833  | 0.280886 | 0.914891 |
| gene1241 | gene1241 | rbgA      | gi 57650036 ref NC_002951.2 :1268907-1270543 | q1 | q2 | OK | 32.6187 | 30.534  | -0.0952806  | 0.053165  | 0.957601 | 0.989588 |
| gene1242 | gene1242 | rnhB      | gi 57650036 ref NC_002951.2 :1268907-1270543 | q1 | q2 | OK | 28.6426 | 34.652  | 0.274774    | -0.13888  | 0.889547 | 0.984151 |
| gene1243 | gene1243 | sucC      | gi 57650036 ref NC_002951.2 :1270651-1271818 | q1 | q2 | OK | 1252.1  | 487.136 | -1.36195    | 1.039     | 0.298804 | 0.924214 |
| gene1244 | gene1244 | sucD      | gi 57650036 ref NC_002951.2 :1271839-1272748 | q1 | q2 | OK | 2371.02 | 630.208 | -1.91161    | 1.45386   | 0.145985 | 0.842707 |
| gene1245 | gene1245 | lytN      | gi 57650036 ref NC_002951.2 :1272941-1274093 | q1 | q2 | OK | 4.60155 | 37.4902 | 3.02632     | -1.74291  | 0.081349 | 0.761588 |
| gene1246 | gene1246 | eprH      | gi 57650036 ref NC_002951.2 :1274120-1275365 | q1 | q2 | OK | 7.11038 | 25.3578 | 1.83443     | -1.06309  | 0.287741 | 0.921417 |
| gene1247 | gene1247 | SACOL1266 | gi 57650036 ref NC_002951.2 :1275537-1276410 | q1 | q2 | OK | 4.93387 | 44.8373 | 3.18391     | -1.76264  | 0.077961 | 0.758524 |
| gene1248 | gene1248 | topA      | gi 57650036 ref NC_002951.2 :1276589-1278659 | q1 | q2 | OK | 153.054 | 65.5454 | -1.22348    | 1.13734   | 0.255396 | 0.890872 |
| gene1249 | gene1249 | gid       | gi 57650036 ref NC_002951.2 :1278814-1280122 | q1 | q2 | OK | 263.164 | 80.0757 | -1.71653    | 1.59138   | 0.111523 | 0.832416 |
| gene125  | gene125  | SACOL0129 | gi 57650036 ref NC_002951.2 :144205-145750   | q1 | q2 | OK | 1.77815 | 69.247  | 5.2833      | -3.13284  | 0.001731 | 0.338293 |
| gene1250 | gene1250 | xerC      | gi 57650036 ref NC_002951.2 :1280538-1281977 | q1 | q2 | OK | 301.659 | 144.19  | -1.06495    | 0.844612  | 0.398328 | 0.940909 |
| gene1251 | gene1251 | hslV      | gi 57650036 ref NC_002951.2 :1280538-1281977 | q1 | q2 | OK | 156.996 | 151.482 | -0.0515844  | 0.023979  | 0.98087  | 0.997969 |
| gene1252 | gene1252 | hslU      | gi 57650036 ref NC_002951.2 :1282042-1283446 | q1 | q2 | OK | 289.354 | 156.991 | -0.882152   | 0.787074  | 0.431239 | 0.956269 |
| gene1253 | gene1253 | codY      | gi 57650036 ref NC_002951.2 :1283470-1284244 | q1 | q2 | OK | 405.552 | 146.313 | -1.47083    | 1.39718   | 0.162358 | 0.842707 |
| gene1254 | gene1254 | rpsB      | gi 57650036 ref NC_002951.2 :1284585-1285350 | q1 | q2 | OK | 708.198 | 89.9788 | -2.9765     | 2.50684   | 0.012182 | 0.500083 |
| gene1255 | gene1255 | SACOL1275 | gi 57650036 ref NC_002951.2 :1285395-1285509 | q1 | q2 | OK | 0       | 216.261 | 1.79769e+30 | 1.79769e+ | 0.207933 | 0.842707 |
| gene1256 | gene1256 | tsf       | gi 57650036 ref NC_002951.2 :1285543-1286425 | q1 | q2 | OK | 1143.29 | 290.487 | -1.97664    | 1.64412   | 0.100151 | 0.815096 |
| gene1257 | gene1257 | pyrH      | gi 57650036 ref NC_002951.2 :1286561-1287284 | q1 | q2 | OK | 101.797 | 77.6173 | -0.39125    | 0.316396  | 0.751702 | 0.978191 |
| gene1258 | gene1258 | frr       | gi 57650036 ref NC_002951.2 :1287302-1287857 | q1 | q2 | OK | 163.695 | 89.0892 | -0.877686   | 0.678543  | 0.497428 | 0.963286 |
| gene1259 | gene1259 | uppS      | gi 57650036 ref NC_002951.2 :1288229-1289000 | q1 | q2 | OK | 58.5322 | 45.7875 | -0.354277   | 0.239556  | 0.810674 | 0.984151 |
| gene126  | gene126  | SACOL0130 | gi 57650036 ref NC_002951.2 :145800-147336   | q1 | q2 | OK | 9.60276 | 36.5321 | 1.92764     | -1.27917  | 0.200837 | 0.842707 |
| gene1260 | gene1260 | cdsA      | gi 57650036 ref NC_002951.2 :1289006-1289789 | q1 | q2 | OK | 93.17   | 56.6623 | -0.717477   | 0.554152  | 0.579475 | 0.976548 |
| gene1261 | gene1261 | SACOL1281 | gi 57650036 ref NC_002951.2 :1290025-1291312 | q1 | q2 | OK | 97.8233 | 69.7365 | -0.488265   | 0.47752   | 0.632992 | 0.978191 |
| gene1262 | gene1262 | proS      | gi 57650036 ref NC_002951.2 :1291331-1293035 | q1 | q2 | OK | 148.906 | 53.4687 | -1.47763    | 1.40029   | 0.161428 | 0.842707 |

|          |          |           |                                              |    |    |          |          |         |            |          |          |          |
|----------|----------|-----------|----------------------------------------------|----|----|----------|----------|---------|------------|----------|----------|----------|
| gene1263 | gene1263 | polC      | gi 57650036 ref NC_002951.2 :1293298-1297609 | q1 | q2 | OK       | 61.248   | 50.9485 | -0.265624  | 0.243405 | 0.807692 | 0.984151 |
| gene1264 | gene1264 | SACOL1284 | gi 57650036 ref NC_002951.2 :1297898-1298366 | q1 | q2 | OK       | 60.2161  | 78.1187 | 0.375519   | -0.22703 | 0.820402 | 0.984151 |
| gene1265 | gene1265 | nusA      | gi 57650036 ref NC_002951.2 :1298386-1299562 | q1 | q2 | OK       | 117.747  | 60.0877 | -0.970548  | 0.915486 | 0.359937 | 0.93284  |
| gene1266 | gene1266 | SACOL1286 | gi 57650036 ref NC_002951.2 :1299582-1300181 | q1 | q2 | OK       | 86.1078  | 58.5817 | -0.555694  | 0.18967  | 0.849568 | 0.984151 |
| gene1267 | gene1267 | SACOL1287 | gi 57650036 ref NC_002951.2 :1299582-1300181 | q1 | q2 | OK       | 143.736  | 106.803 | -0.428462  | 0.205238 | 0.837386 | 0.984151 |
| gene1268 | gene1268 | infB      | gi 57650036 ref NC_002951.2 :1300185-1302303 | q1 | q2 | OK       | 213.785  | 120.962 | -0.821611  | 0.709308 | 0.478133 | 0.956269 |
| gene1269 | gene1269 | rbfA      | gi 57650036 ref NC_002951.2 :1302688-1303039 | q1 | q2 | OK       | 142.98   | 67.118  | -1.09104   | 0.634048 | 0.52605  | 0.963286 |
| gene127  | gene127  | SACOL0132 | gi 57650036 ref NC_002951.2 :147862-148756   | q1 | q2 | NOTEST 0 |          | 0       | 0          | 0        | 1        | 1        |
| gene1270 | gene1270 | truB      | gi 57650036 ref NC_002951.2 :1303207-1304125 | q1 | q2 | OK       | 32.9142  | 66.3726 | 1.01188    | -0.72096 | 0.470935 | 0.956269 |
| gene1271 | gene1271 | ribF      | gi 57650036 ref NC_002951.2 :1304139-1305111 | q1 | q2 | OK       | 133.574  | 138.787 | 0.0552387  | -0.05475 | 0.956338 | 0.98956  |
| gene1272 | gene1272 | rpsO      | gi 57650036 ref NC_002951.2 :1305225-1305495 | q1 | q2 | OK       | 3677.62  | 402.81  | -3.1906    | 2.5487   | 0.010813 | 0.500083 |
| gene1273 | gene1273 | pnp       | gi 57650036 ref NC_002951.2 :1305864-1307961 | q1 | q2 | OK       | 254.948  | 113.294 | -1.17014   | 1.00118  | 0.316739 | 0.927653 |
| gene1274 | gene1274 | SACOL1294 | gi 57650036 ref NC_002951.2 :1308298-1309870 | q1 | q2 | OK       | 433.26   | 193.363 | -1.16392   | 0.963192 | 0.335451 | 0.928169 |
| gene1275 | gene1275 | SACOL1295 | gi 57650036 ref NC_002951.2 :1310116-1312495 | q1 | q2 | OK       | 86.6152  | 68.3005 | -0.342725  | 0.3294   | 0.741854 | 0.978191 |
| gene1276 | gene1276 | SACOL1296 | gi 57650036 ref NC_002951.2 :1312499-1313213 | q1 | q2 | OK       | 29.1832  | 30.4196 | 0.0598669  | -0.03503 | 0.972058 | 0.993959 |
| gene1277 | gene1277 | SACOL1297 | gi 57650036 ref NC_002951.2 :1313243-1316499 | q1 | q2 | OK       | 41.5979  | 28.7669 | -0.532104  | 0.318952 | 0.749763 | 0.978191 |
| gene1278 | gene1278 | SACOL1298 | gi 57650036 ref NC_002951.2 :1313243-1316499 | q1 | q2 | OK       | 39.1695  | 32.3332 | -0.276713  | 0.170313 | 0.864764 | 0.984151 |
| gene1279 | gene1279 | SACOL1299 | gi 57650036 ref NC_002951.2 :1313243-1316499 | q1 | q2 | OK       | 45.2587  | 49.955  | 0.142434   | -0.06852 | 0.945369 | 0.987716 |
| gene128  | gene128  | SACOL0134 | gi 57650036 ref NC_002951.2 :149516-150001   | q1 | q2 | OK       | 0.816393 | 5.94003 | 2.86313    | -1.21436 | 0.224611 | 0.854232 |
| gene1280 | gene1280 | SACOL1300 | gi 57650036 ref NC_002951.2 :1316603-1317431 | q1 | q2 | OK       | 95.4219  | 94.6182 | -0.0122033 | 0.010974 | 0.991244 | 0.997969 |
| gene1281 | gene1281 | SACOL1301 | gi 57650036 ref NC_002951.2 :1317449-1317842 | q1 | q2 | OK       | 99.8657  | 64.2812 | -0.635593  | 0.371885 | 0.709979 | 0.978191 |
| gene1282 | gene1282 | pgsA      | gi 57650036 ref NC_002951.2 :1317875-1318454 | q1 | q2 | OK       | 277.659  | 124.476 | -1.15745   | 1.04462  | 0.2962   | 0.924214 |
| gene1283 | gene1283 | SACOL1303 | gi 57650036 ref NC_002951.2 :1318680-1319832 | q1 | q2 | OK       | 89.2702  | 77.269  | -0.208288  | 0.2016   | 0.840229 | 0.984151 |
| gene1284 | gene1284 | recA      | gi 57650036 ref NC_002951.2 :1319996-1321040 | q1 | q2 | OK       | 530.365  | 309.809 | -0.775607  | 0.657536 | 0.510837 | 0.963286 |
| gene1285 | gene1285 | SACOL1305 | gi 57650036 ref NC_002951.2 :1321393-1322953 | q1 | q2 | OK       | 758.58   | 920.474 | 0.279075   | -0.20473 | 0.837782 | 0.984151 |
| gene1286 | gene1286 | SACOL1306 | gi 57650036 ref NC_002951.2 :1323249-1323465 | q1 | q2 | OK       | 10284.5  | 762.102 | -3.75434   | 2.81767  | 0.004837 | 0.446636 |
| gene1287 | gene1287 | SACOL1307 | gi 57650036 ref NC_002951.2 :1323638-1324436 | q1 | q2 | OK       | 170.69   | 85.8401 | -0.991651  | 0.910118 | 0.36276  | 0.93284  |
| gene1288 | gene1288 | SACOL1308 | gi 57650036 ref NC_002951.2 :1324575-1326336 | q1 | q2 | OK       | 83.3633  | 47.2541 | -0.818973  | 0.796444 | 0.425774 | 0.951977 |
| gene1289 | gene1289 | SACOL1309 | gi 57650036 ref NC_002951.2 :1326336-1327203 | q1 | q2 | OK       | 215.131  | 67.3054 | -1.67642   | 1.48031  | 0.138792 | 0.842707 |
| gene129  | gene129  | SACOL0135 | gi 57650036 ref NC_002951.2 :150450-153060   | q1 | q2 | OK       | 2.50626  | 36.6016 | 3.8683     | -2.47796 | 0.013214 | 0.500083 |
| gene1290 | gene1290 | SACOL1310 | gi 57650036 ref NC_002951.2 :1327296-1327590 | q1 | q2 | OK       | 17.9105  | 15.1363 | -0.242797  | 0.108784 | 0.913374 | 0.984151 |
| gene1291 | gene1291 | miaB      | gi 57650036 ref NC_002951.2 :1327723-1329268 | q1 | q2 | OK       | 77.2687  | 45.4409 | -0.765892  | 0.727352 | 0.467011 | 0.956269 |
| gene1292 | gene1292 | SACOL1313 | gi 57650036 ref NC_002951.2 :1329268-1329634 | q1 | q2 | OK       | 133.722  | 88.1379 | -0.601399  | 0.36173  | 0.717554 | 0.978191 |

|          |          |           |                                              |    |    |        |         |         |             |           |          |          |
|----------|----------|-----------|----------------------------------------------|----|----|--------|---------|---------|-------------|-----------|----------|----------|
| gene1293 | gene1293 | SACOL1314 | gi 57650036 ref NC_002951.2 :1329660-1330152 | q1 | q2 | OK     | 111.332 | 67.2768 | -0.726687   | 0.470753  | 0.637817 | 0.978191 |
| gene1294 | gene1294 | hexA      | gi 57650036 ref NC_002951.2 :1330454-1333073 | q1 | q2 | OK     | 53.3254 | 47.35   | -0.171458   | 0.169513  | 0.865393 | 0.984151 |
| gene1295 | gene1295 | mutL      | gi 57650036 ref NC_002951.2 :1333085-1335095 | q1 | q2 | OK     | 58.1123 | 34.7448 | -0.742045   | 0.70796   | 0.47897  | 0.956269 |
| gene1296 | gene1296 | glpP      | gi 57650036 ref NC_002951.2 :1335100-1335643 | q1 | q2 | OK     | 50.148  | 41.6305 | -0.268554   | 0.157641  | 0.87474  | 0.984151 |
| gene1297 | gene1297 | glpF      | gi 57650036 ref NC_002951.2 :1336107-1336926 | q1 | q2 | OK     | 520.915 | 78.5249 | -2.72983    | 2.32388   | 0.020132 | 0.517412 |
| gene1298 | gene1298 | glpK      | gi 57650036 ref NC_002951.2 :1337054-1338551 | q1 | q2 | OK     | 102.827 | 56.2633 | -0.869948   | 0.844715  | 0.39827  | 0.940909 |
| gene1299 | gene1299 | glpD      | gi 57650036 ref NC_002951.2 :1338708-1340382 | q1 | q2 | OK     | 112.811 | 140.469 | 0.316347    | -0.2999   | 0.764258 | 0.978191 |
| gene13   | gene13   | SACOL0014 | gi 57650036 ref NC_002951.2 :18344-20755     | q1 | q2 | OK     | 184.902 | 92.4262 | -1.00039    | 0.819823  | 0.412317 | 0.943899 |
| gene130  | gene130  | cap5A     | gi 57650036 ref NC_002951.2 :153404-154073   | q1 | q2 | OK     | 78.6505 | 260.661 | 1.72865     | -1.4198   | 0.155665 | 0.842707 |
| gene1300 | gene1300 | SACOL1322 | gi 57650036 ref NC_002951.2 :1340531-1341446 | q1 | q2 | OK     | 12.3578 | 22.2148 | 0.846107    | -0.47485  | 0.634895 | 0.978191 |
| gene1301 | gene1301 | miaA      | gi 57650036 ref NC_002951.2 :1341463-1342399 | q1 | q2 | OK     | 43.1765 | 52.4464 | 0.280597    | -0.20138  | 0.840402 | 0.984151 |
| gene1302 | gene1302 | SACOL1324 | gi 57650036 ref NC_002951.2 :1342413-1342647 | q1 | q2 | OK     | 34.9579 | 67.9751 | 0.959386    | -0.44464  | 0.656582 | 0.978191 |
| gene1303 | gene1303 | gpxA1     | gi 57650036 ref NC_002951.2 :1342868-1343345 | q1 | q2 | OK     | 246.698 | 133.515 | -0.885747   | 0.729357  | 0.465783 | 0.956269 |
| gene1304 | gene1304 | SACOL1326 | gi 57650036 ref NC_002951.2 :1343456-1344695 | q1 | q2 | OK     | 21.8779 | 32.5024 | 0.571069    | -0.38106  | 0.703161 | 0.978191 |
| gene1305 | gene1305 | SACOL1327 | gi 57650036 ref NC_002951.2 :1344713-1345952 | q1 | q2 | OK     | 34.9205 | 39.0028 | 0.159503    | -0.11879  | 0.905438 | 0.984151 |
| gene1306 | gene1306 | glnR      | gi 57650036 ref NC_002951.2 :1346194-1346563 | q1 | q2 | OK     | 180.187 | 169.474 | -0.0884271  | 0.059579  | 0.952491 | 0.988316 |
| gene1307 | gene1307 | femC      | gi 57650036 ref NC_002951.2 :1346581-1347922 | q1 | q2 | OK     | 186.192 | 193.528 | 0.0557559   | -0.05169  | 0.958777 | 0.989588 |
| gene1308 | gene1308 | SACOL1331 | gi 57650036 ref NC_002951.2 :1348414-1348612 | q1 | q2 | OK     | 9.5867  | 24.8383 | 1.37346     | -0.56108  | 0.574742 | 0.976548 |
| gene1309 | gene1309 | SACOL1332 | gi 57650036 ref NC_002951.2 :1349300-1349525 | q1 | q2 | OK     | 0       | 6.80594 | 1.79769e+30 | 1.79769e+ | 0.209916 | 0.842707 |
| gene131  | gene131  | cap5B     | gi 57650036 ref NC_002951.2 :154088-154775   | q1 | q2 | OK     | 32.2664 | 187.681 | 2.54018     | -1.80459  | 0.071138 | 0.754145 |
| gene1310 | gene1310 | SACOL1333 | gi 57650036 ref NC_002951.2 :1349818-1350025 | q1 | q2 | OK     | 0       | 13.1861 | 1.79769e+30 | 1.79769e+ | 0.20195  | 0.842707 |
| gene1311 | gene1311 | SACOL1334 | gi 57650036 ref NC_002951.2 :1350725-1350836 | q1 | q2 | NOTEST | 0       | 0       | 0           | 0         | 1        | 1        |
| gene1312 | gene1312 | SACOL1335 | gi 57650036 ref NC_002951.2 :1351263-1351449 | q1 | q2 | OK     | 12.9338 | 22.8691 | 0.822255    | -0.33275  | 0.739325 | 0.978191 |
| gene1313 | gene1313 | SACOL1336 | gi 57650036 ref NC_002951.2 :1351960-1352065 | q1 | q2 | NOTEST | 0       | 0       | 0           | 0         | 1        | 1        |
| gene1314 | gene1314 | SACOL1337 | gi 57650036 ref NC_002951.2 :1352097-1352193 | q1 | q2 | NOTEST | 0       | 0       | 0           | 0         | 1        | 1        |
| gene1315 | gene1315 | SACOL1338 | gi 57650036 ref NC_002951.2 :1352193-1352445 | q1 | q2 | OK     | 7.88016 | 13.4088 | 0.76688     | -0.3216   | 0.747753 | 0.978191 |
| gene1316 | gene1316 | SACOL1339 | gi 57650036 ref NC_002951.2 :1352649-1353075 | q1 | q2 | OK     | 1.05069 | 29.0865 | 4.79095     | -2.15149  | 0.031437 | 0.604847 |
| gene1317 | gene1317 | SACOL1340 | gi 57650036 ref NC_002951.2 :1353195-1353444 | q1 | q2 | OK     | 40.874  | 44.9895 | 0.138406    | -0.0646   | 0.948492 | 0.987716 |
| gene1318 | gene1318 | SACOL1341 | gi 57650036 ref NC_002951.2 :1353573-1353675 | q1 | q2 | NOTEST | 0       | 0       | 0           | 0         | 1        | 1        |
| gene1319 | gene1319 | SACOL1342 | gi 57650036 ref NC_002951.2 :1353720-1353987 | q1 | q2 | OK     | 0       | 8.67784 | 1.79769e+30 | 1.79769e+ | 0.194317 | 0.842707 |
| gene132  | gene132  | cap5C     | gi 57650036 ref NC_002951.2 :154777-155542   | q1 | q2 | OK     | 28.8014 | 124.628 | 2.11342     | -1.49529  | 0.134838 | 0.842707 |
| gene1320 | gene1320 | SACOL1344 | gi 57650036 ref NC_002951.2 :1354323-1354458 | q1 | q2 | OK     | 0       | 80.7366 | 1.79769e+30 | 1.79769e+ | 0.206623 | 0.842707 |
| gene1321 | gene1321 | SACOL1345 | gi 57650036 ref NC_002951.2 :1354548-1354839 | q1 | q2 | OK     | 21.0287 | 26.2391 | 0.319362    | -0.14712  | 0.883041 | 0.984151 |

|          |          |           |                                              |    |    |          |         |         |           |          |          |          |
|----------|----------|-----------|----------------------------------------------|----|----|----------|---------|---------|-----------|----------|----------|----------|
| gene1322 | gene1322 | SACOL1346 | gi 57650036 ref NC_002951.2 :1354849-1355044 | q1 | q2 | OK       | 20.5727 | 22.4638 | 0.126868  | -0.05211 | 0.958437 | 0.989588 |
| gene1323 | gene1323 | SACOL1347 | gi 57650036 ref NC_002951.2 :1355093-1355435 | q1 | q2 | OK       | 27.7091 | 21.8656 | -0.341698 | 0.164065 | 0.86968  | 0.984151 |
| gene1324 | gene1324 | SACOL1348 | gi 57650036 ref NC_002951.2 :1355441-1355633 | q1 | q2 | OK       | 11.0681 | 14.6392 | 0.403428  | -0.16051 | 0.872478 | 0.984151 |
| gene1325 | gene1325 | SACOL1349 | gi 57650036 ref NC_002951.2 :1356181-1357207 | q1 | q2 | OK       | 5.32413 | 65.1382 | 3.61289   | -2.18658 | 0.028773 | 0.604847 |
| gene1326 | gene1326 | SACOL1350 | gi 57650036 ref NC_002951.2 :1357476-1357674 | q1 | q2 | OK       | 354.708 | 62.0956 | -2.51407  | 1.21532  | 0.224243 | 0.854232 |
| gene1327 | gene1327 | cls1      | gi 57650036 ref NC_002951.2 :1357731-1359213 | q1 | q2 | OK       | 101.506 | 55.1242 | -0.880811 | 0.852924 | 0.393701 | 0.940909 |
| gene1328 | gene1328 | SACOL1352 | gi 57650036 ref NC_002951.2 :1359387-1360996 | q1 | q2 | OK       | 6.23297 | 22.2529 | 1.836     | -0.75379 | 0.450974 | 0.956269 |
| gene1329 | gene1329 | SACOL1353 | gi 57650036 ref NC_002951.2 :1359387-1360996 | q1 | q2 | OK       | 10.5037 | 39.8075 | 1.92214   | -0.8766  | 0.380705 | 0.940893 |
| gene133  | gene133  | cap5D     | gi 57650036 ref NC_002951.2 :155561-158403   | q1 | q2 | OK       | 37.3715 | 164.383 | 2.13705   | -1.56316 | 0.118015 | 0.840838 |
| gene1330 | gene1330 | SACOL1354 | gi 57650036 ref NC_002951.2 :1360999-1362690 | q1 | q2 | OK       | 22.8756 | 38.1051 | 0.736173  | -0.44179 | 0.658642 | 0.978191 |
| gene1331 | gene1331 | SACOL1355 | gi 57650036 ref NC_002951.2 :1360999-1362690 | q1 | q2 | OK       | 45.0395 | 55.5427 | 0.302405  | -0.16014 | 0.872775 | 0.984151 |
| gene1332 | gene1332 | SACOL1356 | gi 57650036 ref NC_002951.2 :1362962-1363070 | q1 | q2 | NOTEST 0 |         | 0       | 0         | 0        | 1        | 1        |
| gene1333 | gene1333 | SACOL1357 | gi 57650036 ref NC_002951.2 :1363129-1363663 | q1 | q2 | OK       | 21.3276 | 32.173  | 0.59313   | -0.31791 | 0.750552 | 0.978191 |
| gene1334 | gene1334 | SACOL1358 | gi 57650036 ref NC_002951.2 :1363805-1364660 | q1 | q2 | OK       | 141.072 | 100.874 | -0.483869 | 0.464681 | 0.64216  | 0.978191 |
| gene1335 | gene1335 | SACOL1359 | gi 57650036 ref NC_002951.2 :1364975-1365566 | q1 | q2 | OK       | 420.916 | 73.9911 | -2.50811  | 1.97709  | 0.048032 | 0.668955 |
| gene1336 | gene1336 | SACOL1360 | gi 57650036 ref NC_002951.2 :1365619-1367002 | q1 | q2 | OK       | 29.8464 | 54.7421 | 0.875094  | -0.70148 | 0.483005 | 0.960232 |
| gene1337 | gene1337 | SACOL1361 | gi 57650036 ref NC_002951.2 :1367007-1367115 | q1 | q2 | NOTEST 0 |         | 0       | 0         | 0        | 1        | 1        |
| gene1338 | gene1338 | hom       | gi 57650036 ref NC_002951.2 :1367192-1368473 | q1 | q2 | OK       | 152.921 | 605.953 | 1.98642   | -1.68503 | 0.091982 | 0.784058 |
| gene1339 | gene1339 | thrC      | gi 57650036 ref NC_002951.2 :1368478-1369540 | q1 | q2 | OK       | 313.374 | 375.79  | 0.262039  | -0.2286  | 0.819184 | 0.984151 |
| gene134  | gene134  | cap5E     | gi 57650036 ref NC_002951.2 :155561-158403   | q1 | q2 | OK       | 41.6387 | 144.918 | 1.79924   | -0.92564 | 0.354632 | 0.93284  |
| gene1340 | gene1340 | thrB      | gi 57650036 ref NC_002951.2 :1369541-1370456 | q1 | q2 | OK       | 185.675 | 196.76  | 0.0836549 | -0.08213 | 0.934544 | 0.987716 |
| gene1341 | gene1341 | SACOL1365 | gi 57650036 ref NC_002951.2 :1370513-1371317 | q1 | q2 | OK       | 445.314 | 226.64  | -0.974423 | 0.911193 | 0.362194 | 0.93284  |
| gene1342 | gene1342 | SACOL1366 | gi 57650036 ref NC_002951.2 :1371609-1371924 | q1 | q2 | OK       | 204.962 | 47.0327 | -2.12362  | 1.18606  | 0.235599 | 0.874029 |
| gene1343 | gene1343 | SACOL1367 | gi 57650036 ref NC_002951.2 :1372141-1373596 | q1 | q2 | OK       | 132.18  | 82.3652 | -0.682398 | 0.667526 | 0.504436 | 0.963286 |
| gene1344 | gene1344 | kataA     | gi 57650036 ref NC_002951.2 :1373895-1375317 | q1 | q2 | OK       | 1662.46 | 1049.05 | -0.664231 | 0.481227 | 0.630355 | 0.978191 |
| gene1345 | gene1345 | rpmG      | gi 57650036 ref NC_002951.2 :1375407-1375557 | q1 | q2 | OK       | 1847.9  | 272.891 | -2.75949  | 1.3295   | 0.183682 | 0.842707 |
| gene1346 | gene1346 | rpsN      | gi 57650036 ref NC_002951.2 :1376010-1376280 | q1 | q2 | OK       | 45.0847 | 31.1698 | -0.532489 | 0.251104 | 0.801734 | 0.984151 |
| gene1347 | gene1347 | guaC      | gi 57650036 ref NC_002951.2 :1376436-1377515 | q1 | q2 | OK       | 21.8021 | 33.4721 | 0.618492  | -0.34516 | 0.729976 | 0.978191 |
| gene1348 | gene1348 | SACOL1372 | gi 57650036 ref NC_002951.2 :1376436-1377515 | q1 | q2 | NOTEST 0 |         | 0       | 0         | 0        | 1        | 1        |
| gene1349 | gene1349 | SACOL1373 | gi 57650036 ref NC_002951.2 :1377588-1378452 | q1 | q2 | OK       | 38.358  | 34.266  | -0.162747 | 0.104239 | 0.91698  | 0.984151 |
| gene135  | gene135  | cap5F     | gi 57650036 ref NC_002951.2 :158415-159525   | q1 | q2 | OK       | 64.8235 | 98.9956 | 0.610849  | -0.57036 | 0.568431 | 0.976548 |
| gene1350 | gene1350 | lexA      | gi 57650036 ref NC_002951.2 :1378831-1379455 | q1 | q2 | OK       | 945.312 | 403.331 | -1.22883  | 1.08917  | 0.276078 | 0.912816 |
| gene1351 | gene1351 | SACOL1375 | gi 57650036 ref NC_002951.2 :1379597-1379831 | q1 | q2 | OK       | 104.874 | 40.785  | -1.36254  | 0.649037 | 0.516314 | 0.963286 |

|          |          |           |                                              |    |    |          |         |         |            |          |          |          |
|----------|----------|-----------|----------------------------------------------|----|----|----------|---------|---------|------------|----------|----------|----------|
| gene1352 | gene1352 | SACOL1376 | gi 57650036 ref NC_002951.2 :1379966-1380206 | q1 | q2 | OK       | 27.5558 | 42.4021 | 0.621777   | -0.28149 | 0.778336 | 0.981979 |
| gene1353 | gene1353 | tkt       | gi 57650036 ref NC_002951.2 :1380326-1382315 | q1 | q2 | OK       | 599.288 | 239.842 | -1.32117   | 1.0185   | 0.30844  | 0.927653 |
| gene1354 | gene1354 | SACOL1378 | gi 57650036 ref NC_002951.2 :1382592-1382920 | q1 | q2 | OK       | 807.503 | 57.4349 | -3.81347   | 1.68671  | 0.091659 | 0.784058 |
| gene1355 | gene1355 | SACOL1379 | gi 57650036 ref NC_002951.2 :1382592-1382920 | q1 | q2 | NOTEST 0 |         | 0       | 0          | 0        | 1        | 1        |
| gene1356 | gene1356 | SACOL1380 | gi 57650036 ref NC_002951.2 :1383013-1383481 | q1 | q2 | OK       | 90.7605 | 23.3245 | -1.96022   | 1.10788  | 0.267913 | 0.902578 |
| gene1357 | gene1357 | sbcD      | gi 57650036 ref NC_002951.2 :1383604-1384726 | q1 | q2 | OK       | 16.6432 | 52.5206 | 1.65795    | -1.12111 | 0.262241 | 0.899266 |
| gene1358 | gene1358 | sbcC      | gi 57650036 ref NC_002951.2 :1384729-1387759 | q1 | q2 | OK       | 27.3247 | 26.4536 | -0.0467411 | 0.044997 | 0.964109 | 0.989588 |
| gene1359 | gene1359 | mscL      | gi 57650036 ref NC_002951.2 :1387829-1388192 | q1 | q2 | OK       | 2048.35 | 196.187 | -3.38416   | 2.66303  | 0.007744 | 0.480028 |
| gene136  | gene136  | cap5G     | gi 57650036 ref NC_002951.2 :159528-160653   | q1 | q2 | OK       | 60.9011 | 74.9987 | 0.300397   | -0.27288 | 0.784947 | 0.982219 |
| gene1360 | gene1360 | opuD1     | gi 57650036 ref NC_002951.2 :1388395-1390042 | q1 | q2 | OK       | 293.83  | 66.4436 | -2.14478   | 1.90943  | 0.056207 | 0.696046 |
| gene1361 | gene1361 | acnA      | gi 57650036 ref NC_002951.2 :1390933-1393639 | q1 | q2 | OK       | 944.717 | 456.295 | -1.04991   | 0.763285 | 0.445293 | 0.956269 |
| gene1362 | gene1362 | SACOL1386 | gi 57650036 ref NC_002951.2 :1393818-1394286 | q1 | q2 | OK       | 156.213 | 83.3019 | -0.90709   | 0.62244  | 0.533653 | 0.963286 |
| gene1363 | gene1363 | SACOL1387 | gi 57650036 ref NC_002951.2 :1394492-1394789 | q1 | q2 | OK       | 306.421 | 187.99  | -0.704862  | 0.450951 | 0.652025 | 0.978191 |
| gene1364 | gene1364 | SACOL1388 | gi 57650036 ref NC_002951.2 :1395164-1395773 | q1 | q2 | OK       | 404.035 | 98.8672 | -2.03092   | 1.74304  | 0.081326 | 0.761588 |
| gene1365 | gene1365 | parE      | gi 57650036 ref NC_002951.2 :1395972-1400372 | q1 | q2 | OK       | 94.7401 | 70.3564 | -0.429294  | 0.261398 | 0.793786 | 0.983552 |
| gene1366 | gene1366 | parC      | gi 57650036 ref NC_002951.2 :1395972-1400372 | q1 | q2 | OK       | 100.853 | 41.6317 | -1.2765    | 0.778947 | 0.436011 | 0.956269 |
| gene1367 | gene1367 | SACOL1392 | gi 57650036 ref NC_002951.2 :1400621-1402097 | q1 | q2 | OK       | 130.816 | 50.3157 | -1.37847   | 1.30346  | 0.192418 | 0.842707 |
| gene1368 | gene1368 | SACOL1393 | gi 57650036 ref NC_002951.2 :1402581-1404776 | q1 | q2 | OK       | 62.2048 | 36.6165 | -0.764533  | 0.24443  | 0.806898 | 0.984151 |
| gene1369 | gene1369 | SACOL1394 | gi 57650036 ref NC_002951.2 :1402581-1404776 | q1 | q2 | OK       | 180.733 | 39.4088 | -2.19726   | 0.110017 | 0.912396 | 0.984151 |
| gene137  | gene137  | cap5H     | gi 57650036 ref NC_002951.2 :160655-161282   | q1 | q2 | NOTEST 0 |         | 0       | 0          | 0        | 1        | 1        |
| gene1370 | gene1370 | SACOL1395 | gi 57650036 ref NC_002951.2 :1402581-1404776 | q1 | q2 | OK       | 251.452 | 181.672 | -0.468945  | 0.39283  | 0.694445 | 0.978191 |
| gene1371 | gene1371 | fmtC      | gi 57650036 ref NC_002951.2 :1405256-1407779 | q1 | q2 | OK       | 143.06  | 144.537 | 0.0148175  | -0.01261 | 0.989937 | 0.997969 |
| gene1372 | gene1372 | msrA      | gi 57650036 ref NC_002951.2 :1407981-1408491 | q1 | q2 | OK       | 87.9646 | 72.6137 | -0.27668   | 0.178133 | 0.858619 | 0.984151 |
| gene1373 | gene1373 | SACOL1398 | gi 57650036 ref NC_002951.2 :1408627-1409611 | q1 | q2 | OK       | 66.0139 | 33.4851 | -0.979248  | 0.718127 | 0.472679 | 0.956269 |
| gene1374 | gene1374 | dmpI      | gi 57650036 ref NC_002951.2 :1409698-1409884 | q1 | q2 | OK       | 569.086 | 28.5863 | -4.31525   | 2.00262  | 0.045218 | 0.650761 |
| gene1375 | gene1375 | SACOL1400 | gi 57650036 ref NC_002951.2 :1410031-1411294 | q1 | q2 | OK       | 17.6736 | 50.2618 | 1.50786    | -1.05944 | 0.289398 | 0.921417 |
| gene1376 | gene1376 | tyrA      | gi 57650036 ref NC_002951.2 :1411430-1412522 | q1 | q2 | OK       | 80.6796 | 67.7294 | -0.252421  | 0.234345 | 0.814717 | 0.984151 |
| gene1377 | gene1377 | SACOL1402 | gi 57650036 ref NC_002951.2 :1412686-1413718 | q1 | q2 | OK       | 99.8792 | 64.1805 | -0.638048  | 0.585291 | 0.558352 | 0.976548 |
| gene1378 | gene1378 | trpE      | gi 57650036 ref NC_002951.2 :1414209-1416179 | q1 | q2 | OK       | 2.52701 | 21.83   | 3.11081    | -1.57708 | 0.114777 | 0.836663 |
| gene1379 | gene1379 | trpG      | gi 57650036 ref NC_002951.2 :1414209-1416179 | q1 | q2 | OK       | 1.86592 | 27.4865 | 3.88076    | -0.98635 | 0.32396  | 0.927653 |
| gene138  | gene138  | cap5I     | gi 57650036 ref NC_002951.2 :161286-162396   | q1 | q2 | NOTEST 0 |         | 0       | 0          | 0        | 1        | 1        |
| gene1380 | gene1380 | trpD      | gi 57650036 ref NC_002951.2 :1416184-1417183 | q1 | q2 | OK       | 4.13214 | 47.8813 | 3.5345     | -2.01252 | 0.044165 | 0.650761 |
| gene1381 | gene1381 | trpC      | gi 57650036 ref NC_002951.2 :1417184-1420527 | q1 | q2 | OK       | 4.20028 | 30.4428 | 2.85754    | -0.97325 | 0.330429 | 0.927653 |

|          |          |           |                                              |    |    |          |         |         |             |           |          |          |
|----------|----------|-----------|----------------------------------------------|----|----|----------|---------|---------|-------------|-----------|----------|----------|
| gene1382 | gene1382 | trpF      | gi 57650036 ref NC_002951.2 :1417184-1420527 | q1 | q2 | OK       | 1.55385 | 25.8663 | 4.05715     | -0.78155  | 0.434481 | 0.956269 |
| gene1383 | gene1383 | trpB      | gi 57650036 ref NC_002951.2 :1417184-1420527 | q1 | q2 | OK       | 2.58549 | 33.6673 | 3.70284     | -1.39722  | 0.162347 | 0.842707 |
| gene1384 | gene1384 | trpA      | gi 57650036 ref NC_002951.2 :1417184-1420527 | q1 | q2 | OK       | 5.91699 | 22.2367 | 1.91001     | -0.65912  | 0.509819 | 0.963286 |
| gene1385 | gene1385 | femA      | gi 57650036 ref NC_002951.2 :1420809-1422111 | q1 | q2 | OK       | 328.409 | 192.627 | -0.769686   | 0.678209  | 0.497639 | 0.963286 |
| gene1386 | gene1386 | SACOL1411 | gi 57650036 ref NC_002951.2 :1422129-1423389 | q1 | q2 | OK       | 625.726 | 209.844 | -1.57622    | 1.31343   | 0.189038 | 0.842707 |
| gene1387 | gene1387 | SACOL1412 | gi 57650036 ref NC_002951.2 :1424071-1424839 | q1 | q2 | OK       | 11.3786 | 42.4126 | 1.89817     | -1.07783  | 0.28111  | 0.914891 |
| gene1388 | gene1388 | SACOL1413 | gi 57650036 ref NC_002951.2 :1424886-1425360 | q1 | q2 | OK       | 253.889 | 95.0028 | -1.41815    | 1.08039   | 0.279969 | 0.914891 |
| gene1389 | gene1389 | SACOL1414 | gi 57650036 ref NC_002951.2 :1425483-1428747 | q1 | q2 | OK       | 33.9336 | 36.0045 | 0.085461    | -0.03973  | 0.968307 | 0.992211 |
| gene139  | gene139  | cap5J     | gi 57650036 ref NC_002951.2 :162409-164774   | q1 | q2 | NOTEST 0 |         | 0       | 0           | 0         | 1        | 1        |
| gene1390 | gene1390 | SACOL1415 | gi 57650036 ref NC_002951.2 :1425483-1428747 | q1 | q2 | OK       | 13.5831 | 31.442  | 1.21088     | -0.45322  | 0.650391 | 0.978191 |
| gene1391 | gene1391 | SACOL1416 | gi 57650036 ref NC_002951.2 :1425483-1428747 | q1 | q2 | OK       | 10.9017 | 44.9719 | 2.04447     | -0.7825   | 0.433919 | 0.956269 |
| gene1392 | gene1392 | SACOL1417 | gi 57650036 ref NC_002951.2 :1425483-1428747 | q1 | q2 | OK       | 12.3115 | 29.9454 | 1.28233     | -0.54099  | 0.588517 | 0.978191 |
| gene1393 | gene1393 | SACOL1418 | gi 57650036 ref NC_002951.2 :1429050-1429395 | q1 | q2 | OK       | 98.3008 | 45.5271 | -1.11048    | 0.603862  | 0.545935 | 0.97151  |
| gene1394 | gene1394 | SACOL1419 | gi 57650036 ref NC_002951.2 :1429599-1431414 | q1 | q2 | OK       | 137.177 | 97.6593 | -0.490211   | 0.46364   | 0.642906 | 0.978191 |
| gene1395 | gene1395 | SACOL1420 | gi 57650036 ref NC_002951.2 :1431553-1432195 | q1 | q2 | OK       | 6.12628 | 17.7089 | 1.53139     | -0.75931  | 0.44767  | 0.956269 |
| gene1396 | gene1396 | SACOL1421 | gi 57650036 ref NC_002951.2 :1432201-1433053 | q1 | q2 | OK       | 3.39917 | 33.4599 | 3.29918     | -1.73233  | 0.083215 | 0.76604  |
| gene1397 | gene1397 | SACOL1422 | gi 57650036 ref NC_002951.2 :1433099-1434017 | q1 | q2 | OK       | 7.07501 | 45.5414 | 2.68637     | -1.54712  | 0.121835 | 0.842707 |
| gene1398 | gene1398 | SACOL1423 | gi 57650036 ref NC_002951.2 :1434018-1434945 | q1 | q2 | OK       | 2.73306 | 28.2434 | 3.36932     | -1.75019  | 0.080085 | 0.760657 |
| gene1399 | gene1399 | SACOL1424 | gi 57650036 ref NC_002951.2 :1435135-1436119 | q1 | q2 | OK       | 14.6073 | 55.501  | 1.92582     | -1.2418   | 0.214311 | 0.850184 |
| gene14   | gene14   | rplI      | gi 57650036 ref NC_002951.2 :18344-20755     | q1 | q2 | OK       | 126.84  | 161.855 | 0.351691    | -0.10377  | 0.917354 | 0.984151 |
| gene140  | gene140  | cap5K     | gi 57650036 ref NC_002951.2 :162409-164774   | q1 | q2 | NOTEST 0 |         | 0       | 0           | 0         | 1        | 1        |
| gene1400 | gene1400 | SACOL1425 | gi 57650036 ref NC_002951.2 :1436658-1436955 | q1 | q2 | OK       | 0       | 17.5089 | 1.79769e+30 | 1.79769e+ | 0.175616 | 0.842707 |
| gene1401 | gene1401 | SACOL1426 | gi 57650036 ref NC_002951.2 :1437090-1437993 | q1 | q2 | OK       | 249.32  | 117.911 | -1.0803     | 1.04764   | 0.294803 | 0.924214 |
| gene1402 | gene1402 | SACOL1427 | gi 57650036 ref NC_002951.2 :1438139-1439741 | q1 | q2 | OK       | 70.8192 | 34.9077 | -1.02059    | 0.921935  | 0.356562 | 0.93284  |
| gene1403 | gene1403 | lysC      | gi 57650036 ref NC_002951.2 :1440600-1441806 | q1 | q2 | OK       | 17.177  | 34.1699 | 0.992242    | -0.64339  | 0.519974 | 0.963286 |
| gene1404 | gene1404 | asd       | gi 57650036 ref NC_002951.2 :1441869-1442859 | q1 | q2 | OK       | 75.2519 | 78.6418 | 0.0635671   | -0.05753  | 0.954126 | 0.989031 |
| gene1405 | gene1405 | dapA      | gi 57650036 ref NC_002951.2 :1442860-1444467 | q1 | q2 | OK       | 87.7692 | 87.3183 | -0.00743035 | 0.00578   | 0.995389 | 0.998672 |
| gene1406 | gene1406 | dapB      | gi 57650036 ref NC_002951.2 :1442860-1444467 | q1 | q2 | OK       | 76.9896 | 65.6912 | -0.228963   | 0.139792  | 0.888824 | 0.984151 |
| gene1407 | gene1407 | dapD      | gi 57650036 ref NC_002951.2 :1444493-1445213 | q1 | q2 | OK       | 182.019 | 101.053 | -0.848977   | 0.782491  | 0.433926 | 0.956269 |
| gene1408 | gene1408 | SACOL1433 | gi 57650036 ref NC_002951.2 :1445355-1446507 | q1 | q2 | OK       | 54.7585 | 45.6639 | -0.262029   | 0.214677  | 0.830019 | 0.984151 |
| gene1409 | gene1409 | SACOL1434 | gi 57650036 ref NC_002951.2 :1446511-1448852 | q1 | q2 | OK       | 39.382  | 39.9954 | 0.0222971   | -0.01188  | 0.990525 | 0.997969 |
| gene141  | gene141  | cap5L     | gi 57650036 ref NC_002951.2 :164774-165980   | q1 | q2 | OK       | 33.4844 | 46.7642 | 0.481916    | -0.36383  | 0.715988 | 0.978191 |
| gene1410 | gene1410 | lysA      | gi 57650036 ref NC_002951.2 :1446511-1448852 | q1 | q2 | OK       | 99.9989 | 58.9964 | -0.761285   | 0.62441   | 0.532358 | 0.963286 |

|          |          |           |                                              |    |    |    |         |         |             |             |          |          |
|----------|----------|-----------|----------------------------------------------|----|----|----|---------|---------|-------------|-------------|----------|----------|
| gene1411 | gene1411 | SACOL1436 | gi 57650036 ref NC_002951.2 :1449091-1449493 | q1 | q2 | OK | 0       | 22.1539 | 1.79769e+30 | 1.79769e+30 | 0.154814 | 0.842707 |
| gene1412 | gene1412 | SACOL1437 | gi 57650036 ref NC_002951.2 :1449689-1449890 | q1 | q2 | OK | 3611.25 | 1728.7  | -1.06281    | 0.947241    | 0.343516 | 0.93284  |
| gene1413 | gene1413 | SACOL1438 | gi 57650036 ref NC_002951.2 :1450060-1450369 | q1 | q2 | OK | 222.237 | 156.94  | -0.501889   | 0.310593    | 0.75611  | 0.978191 |
| gene1414 | gene1414 | SACOL1439 | gi 57650036 ref NC_002951.2 :1450531-1450801 | q1 | q2 | OK | 463.728 | 883.544 | 0.930022    | -0.73497    | 0.462356 | 0.956269 |
| gene1415 | gene1415 | SACOL1440 | gi 57650036 ref NC_002951.2 :1450819-1451449 | q1 | q2 | OK | 180.805 | 276.065 | 0.610573    | -0.59345    | 0.552879 | 0.976229 |
| gene1416 | gene1416 | SACOL1441 | gi 57650036 ref NC_002951.2 :1451480-1452617 | q1 | q2 | OK | 296.997 | 219.51  | -0.436161   | 0.396493    | 0.691742 | 0.978191 |
| gene1417 | gene1417 | SACOL1442 | gi 57650036 ref NC_002951.2 :1452884-1453277 | q1 | q2 | OK | 1.24832 | 23.101  | 4.2099      | -1.85778    | 0.0632   | 0.717594 |
| gene1418 | gene1418 | brnQ3     | gi 57650036 ref NC_002951.2 :1453629-1454973 | q1 | q2 | OK | 23.0687 | 26.0161 | 0.17347     | -0.11556    | 0.908001 | 0.984151 |
| gene1419 | gene1419 | SACOL1444 | gi 57650036 ref NC_002951.2 :1455197-1457084 | q1 | q2 | OK | 20.0327 | 29.9382 | 0.579635    | -0.44396    | 0.657069 | 0.978191 |
| gene142  | gene142  | cap5M     | gi 57650036 ref NC_002951.2 :165990-167435   | q1 | q2 | OK | 25.5478 | 55.7283 | 1.12521     | -0.48463    | 0.627937 | 0.978191 |
| gene1420 | gene1420 | SACOL1445 | gi 57650036 ref NC_002951.2 :1457097-1457889 | q1 | q2 | OK | 24.8027 | 42.8225 | 0.787875    | -0.48237    | 0.629542 | 0.978191 |
| gene1421 | gene1421 | SACOL1446 | gi 57650036 ref NC_002951.2 :1458069-1458273 | q1 | q2 | OK | 251.98  | 74.4326 | -1.75931    | 0.854195    | 0.392997 | 0.940909 |
| gene1422 | gene1422 | SACOL1447 | gi 57650036 ref NC_002951.2 :1458301-1459111 | q1 | q2 | OK | 281.939 | 133.538 | -1.07813    | 1.04618     | 0.29548  | 0.924214 |
| gene1423 | gene1423 | sucB      | gi 57650036 ref NC_002951.2 :1459690-1460959 | q1 | q2 | OK | 765.003 | 269.467 | -1.50536    | 1.21302     | 0.225123 | 0.854232 |
| gene1424 | gene1424 | sucA      | gi 57650036 ref NC_002951.2 :1460972-1463771 | q1 | q2 | OK | 584.066 | 266.452 | -1.13226    | 0.840697    | 0.400518 | 0.940909 |
| gene1425 | gene1425 | arlS      | gi 57650036 ref NC_002951.2 :1464054-1466066 | q1 | q2 | OK | 45.2711 | 58.5227 | 0.370406    | -0.26586    | 0.790345 | 0.982219 |
| gene1426 | gene1426 | arlR      | gi 57650036 ref NC_002951.2 :1464054-1466066 | q1 | q2 | OK | 81.2514 | 149.608 | 0.88072     | -0.58175    | 0.560736 | 0.976548 |
| gene1427 | gene1427 | SACOL1452 | gi 57650036 ref NC_002951.2 :1466853-1467468 | q1 | q2 | OK | 112.968 | 42.5167 | -1.40981    | 0.960364    | 0.336872 | 0.93058  |
| gene1428 | gene1428 | murG      | gi 57650036 ref NC_002951.2 :1467484-1468555 | q1 | q2 | OK | 45.3726 | 50.1844 | 0.145417    | -0.11213    | 0.910718 | 0.984151 |
| gene1429 | gene1429 | SACOL1454 | gi 57650036 ref NC_002951.2 :1468566-1469077 | q1 | q2 | OK | 11.8861 | 24.4526 | 1.04072     | -0.52351    | 0.600618 | 0.978191 |
| gene143  | gene143  | cap5N     | gi 57650036 ref NC_002951.2 :165990-167435   | q1 | q2 | OK | 29.5779 | 37.5933 | 0.345956    | -0.19049    | 0.848926 | 0.984151 |
| gene1430 | gene1430 | SACOL1455 | gi 57650036 ref NC_002951.2 :1469476-1470967 | q1 | q2 | OK | 118.819 | 54.5835 | -1.12223    | 1.07929     | 0.280457 | 0.914891 |
| gene1431 | gene1431 | SACOL1456 | gi 57650036 ref NC_002951.2 :1471158-1471880 | q1 | q2 | OK | 1057.23 | 107.966 | -3.29164    | 1.05976     | 0.289256 | 0.921417 |
| gene1432 | gene1432 | SACOL1457 | gi 57650036 ref NC_002951.2 :1471158-1471880 | q1 | q2 | OK | 353.993 | 176.545 | -1.00368    | 0.839434    | 0.401226 | 0.940909 |
| gene1433 | gene1433 | SACOL1459 | gi 57650036 ref NC_002951.2 :1471891-1473771 | q1 | q2 | OK | 367.588 | 181.268 | -1.01996    | 0.769236    | 0.441753 | 0.956269 |
| gene1434 | gene1434 | SACOL1460 | gi 57650036 ref NC_002951.2 :1471891-1473771 | q1 | q2 | OK | 170.495 | 75.6948 | -1.17146    | 0.503051    | 0.614928 | 0.978191 |
| gene1435 | gene1435 | folA      | gi 57650036 ref NC_002951.2 :1473785-1474265 | q1 | q2 | OK | 198.895 | 180.842 | -0.137278   | 0.117555    | 0.90642  | 0.984151 |
| gene1436 | gene1436 | thyA      | gi 57650036 ref NC_002951.2 :1474464-1475421 | q1 | q2 | OK | 104.559 | 81.3111 | -0.362798   | 0.341157    | 0.732986 | 0.978191 |
| gene1437 | gene1437 | SACOL1464 | gi 57650036 ref NC_002951.2 :1475844-1476282 | q1 | q2 | OK | 289.969 | 82.7457 | -1.80914    | 1.3174      | 0.187706 | 0.842707 |
| gene1438 | gene1438 | SACOL1465 | gi 57650036 ref NC_002951.2 :1476297-1477422 | q1 | q2 | OK | 141.945 | 131.612 | -0.109037   | 0.107643    | 0.914279 | 0.984151 |
| gene1439 | gene1439 | SACOL1466 | gi 57650036 ref NC_002951.2 :1477459-1477711 | q1 | q2 | OK | 110.322 | 67.0438 | -0.718547   | 0.361704    | 0.717573 | 0.978191 |
| gene144  | gene144  | cap5O     | gi 57650036 ref NC_002951.2 :167488-168751   | q1 | q2 | OK | 31.8536 | 55.9333 | 0.812251    | -0.63771    | 0.523664 | 0.963286 |
| gene1440 | gene1440 | SACOL1467 | gi 57650036 ref NC_002951.2 :1477722-1477917 | q1 | q2 | OK | 41.1454 | 152.754 | 1.8924      | -0.8552     | 0.392442 | 0.940909 |

|          |          |           |                                              |    |    |          |         |         |            |          |          |          |
|----------|----------|-----------|----------------------------------------------|----|----|----------|---------|---------|------------|----------|----------|----------|
| gene1441 | gene1441 | SACOL1468 | gi 57650036 ref NC_002951.2 :1478161-1478866 | q1 | q2 | OK       | 12.424  | 30.337  | 1.28796    | -0.70263 | 0.482287 | 0.960232 |
| gene1442 | gene1442 | SACOL1469 | gi 57650036 ref NC_002951.2 :1478930-1479062 | q1 | q2 | OK       | 154.143 | 289.393 | 0.908764   | -0.37125 | 0.710454 | 0.978191 |
| gene1443 | gene1443 | SACOL1471 | gi 57650036 ref NC_002951.2 :1479406-1479808 | q1 | q2 | OK       | 16.6283 | 26.9699 | 0.697712   | -0.34226 | 0.732155 | 0.978191 |
| gene1444 | gene1444 | ebh       | gi 57650036 ref NC_002951.2 :1479866-1511363 | q1 | q2 | OK       | 4.84265 | 26.0745 | 2.42877    | -2.04033 | 0.041317 | 0.643773 |
| gene1445 | gene1445 | SACOL1475 | gi 57650036 ref NC_002951.2 :1511760-1513152 | q1 | q2 | OK       | 4.93608 | 50.229  | 3.34708    | -2.09796 | 0.035909 | 0.626017 |
| gene1446 | gene1446 | SACOL1476 | gi 57650036 ref NC_002951.2 :1513308-1514631 | q1 | q2 | OK       | 4.663   | 81.2457 | 4.12296    | -2.60472 | 0.009195 | 0.498321 |
| gene1447 | gene1447 | ilvA1     | gi 57650036 ref NC_002951.2 :1514661-1515702 | q1 | q2 | OK       | 3.39718 | 40.8615 | 3.58833    | -1.99645 | 0.045884 | 0.650761 |
| gene1448 | gene1448 | ald1      | gi 57650036 ref NC_002951.2 :1515796-1516915 | q1 | q2 | OK       | 5.48682 | 35.6524 | 2.69996    | -1.55432 | 0.120108 | 0.842707 |
| gene1449 | gene1449 | SACOL1479 | gi 57650036 ref NC_002951.2 :1517389-1518268 | q1 | q2 | OK       | 205.326 | 98.0046 | -1.06699   | 1.02522  | 0.305259 | 0.927653 |
| gene145  | gene145  | cap5P     | gi 57650036 ref NC_002951.2 :168797-169973   | q1 | q2 | OK       | 36.5576 | 41.7955 | 0.193176   | -0.14354 | 0.885866 | 0.984151 |
| gene1450 | gene1450 | SACOL1480 | gi 57650036 ref NC_002951.2 :1518287-1521728 | q1 | q2 | OK       | 132.117 | 61.6017 | -1.10078   | 0.957131 | 0.338501 | 0.93058  |
| gene1451 | gene1451 | SACOL1481 | gi 57650036 ref NC_002951.2 :1522031-1523372 | q1 | q2 | OK       | 6.88183 | 21.1586 | 1.62038    | -0.9347  | 0.349942 | 0.93284  |
| gene1452 | gene1452 | SACOL1482 | gi 57650036 ref NC_002951.2 :1523577-1523910 | q1 | q2 | OK       | 77.7565 | 36.5102 | -1.09066   | 0.568242 | 0.56987  | 0.976548 |
| gene1453 | gene1453 | SACOL1483 | gi 57650036 ref NC_002951.2 :1523993-1525139 | q1 | q2 | OK       | 40.5255 | 30.486  | -0.410684  | 0.289259 | 0.772383 | 0.980274 |
| gene1454 | gene1454 | SACOL1484 | gi 57650036 ref NC_002951.2 :1525789-1526134 | q1 | q2 | OK       | 271.174 | 379.826 | 0.486116   | -0.38559 | 0.699799 | 0.978191 |
| gene1455 | gene1455 | SACOL1485 | gi 57650036 ref NC_002951.2 :1526147-1527054 | q1 | q2 | OK       | 339.45  | 181.453 | -0.903605  | 0.708989 | 0.478331 | 0.956269 |
| gene1456 | gene1456 | SACOL1486 | gi 57650036 ref NC_002951.2 :1526147-1527054 | q1 | q2 | OK       | 375.323 | 279.763 | -0.423928  | 0.242493 | 0.808398 | 0.984151 |
| gene1457 | gene1457 | SACOL1488 | gi 57650036 ref NC_002951.2 :1527487-1530400 | q1 | q2 | NOTEST 0 |         | 0       | 0          | 0        | 1        | 1        |
| gene1458 | gene1458 | recU      | gi 57650036 ref NC_002951.2 :1527487-1530400 | q1 | q2 | OK       | 139.26  | 86.3031 | -0.690295  | 0.144109 | 0.885414 | 0.984151 |
| gene1459 | gene1459 | pbp2      | gi 57650036 ref NC_002951.2 :1527487-1530400 | q1 | q2 | OK       | 534.121 | 121.618 | -2.13481   | 1.62639  | 0.103867 | 0.816291 |
| gene146  | gene146  | SACOL0152 | gi 57650036 ref NC_002951.2 :170037-170364   | q1 | q2 | OK       | 29.0823 | 12.4302 | -1.22629   | 0.569227 | 0.569202 | 0.976548 |
| gene1460 | gene1460 | SACOL1491 | gi 57650036 ref NC_002951.2 :1530965-1531307 | q1 | q2 | OK       | 126.423 | 46.3816 | -1.44663   | 0.800373 | 0.423495 | 0.949436 |
| gene1461 | gene1461 | nth       | gi 57650036 ref NC_002951.2 :1531311-1532647 | q1 | q2 | OK       | 100.341 | 55.9923 | -0.841607  | 0.525547 | 0.599203 | 0.978191 |
| gene1462 | gene1462 | SACOL1493 | gi 57650036 ref NC_002951.2 :1531311-1532647 | q1 | q2 | OK       | 71.4469 | 110.388 | 0.627641   | -0.44096 | 0.659245 | 0.978191 |
| gene1463 | gene1463 | asnC      | gi 57650036 ref NC_002951.2 :1532974-1534267 | q1 | q2 | OK       | 178.17  | 53.4707 | -1.73644   | 1.60118  | 0.109337 | 0.828505 |
| gene1464 | gene1464 | SACOL1495 | gi 57650036 ref NC_002951.2 :1534588-1537282 | q1 | q2 | OK       | 58.5372 | 34.7043 | -0.754239  | 0.738673 | 0.460106 | 0.956269 |
| gene1465 | gene1465 | birA      | gi 57650036 ref NC_002951.2 :1537305-1539466 | q1 | q2 | OK       | 69.0702 | 64.5087 | -0.0985707 | 0.070937 | 0.943448 | 0.987716 |
| gene1466 | gene1466 | papS      | gi 57650036 ref NC_002951.2 :1537305-1539466 | q1 | q2 | OK       | 57.5776 | 33.0279 | -0.801823  | 0.530347 | 0.595871 | 0.978191 |
| gene1467 | gene1467 | SACOL1498 | gi 57650036 ref NC_002951.2 :1539470-1540625 | q1 | q2 | OK       | 52.7474 | 49.8689 | -0.0809607 | 0.067258 | 0.946376 | 0.987716 |
| gene1468 | gene1468 | SACOL1499 | gi 57650036 ref NC_002951.2 :1540853-1541171 | q1 | q2 | OK       | 66.66   | 70.1627 | 0.0738837  | -0.0392  | 0.96873  | 0.992211 |
| gene1469 | gene1469 | SACOL1500 | gi 57650036 ref NC_002951.2 :1541507-1542215 | q1 | q2 | OK       | 2380.77 | 1733.82 | -0.457477  | 0.337623 | 0.735647 | 0.978191 |
| gene147  | gene147  | SACOL0153 | gi 57650036 ref NC_002951.2 :170370-170754   | q1 | q2 | OK       | 2.62983 | 14.6895 | 2.48174    | -1.08629 | 0.277352 | 0.9146   |
| gene1470 | gene1470 | SACOL1501 | gi 57650036 ref NC_002951.2 :1542259-1543412 | q1 | q2 | OK       | 41.6173 | 33.0994 | -0.330381  | 0.1578   | 0.874614 | 0.984151 |



|          |          |           |                                              |    |    |        |          |         |             |             |          |          |
|----------|----------|-----------|----------------------------------------------|----|----|--------|----------|---------|-------------|-------------|----------|----------|
| gene1471 | gene1471 | SACOL1502 | gi 57650036 ref NC_002951.2 :1542259-1543412 | q1 | q2 | OK     | 47.8823  | 27.6633 | -0.791518   | 0.366175    | 0.714235 | 0.978191 |
| gene1472 | gene1472 | SACOL1503 | gi 57650036 ref NC_002951.2 :1543425-1544670 | q1 | q2 | OK     | 79.0507  | 31.2249 | -1.34008    | 1.07994     | 0.280171 | 0.914891 |
| gene1473 | gene1473 | aroA      | gi 57650036 ref NC_002951.2 :1544676-1545975 | q1 | q2 | OK     | 78.8552  | 56.8739 | -0.471439   | 0.447065    | 0.654828 | 0.978191 |
| gene1474 | gene1474 | aroB      | gi 57650036 ref NC_002951.2 :1545984-1547049 | q1 | q2 | OK     | 45.4423  | 51.9624 | 0.193432    | -0.14984    | 0.880893 | 0.984151 |
| gene1475 | gene1475 | aroC      | gi 57650036 ref NC_002951.2 :1547074-1548241 | q1 | q2 | OK     | 50.2651  | 45.0754 | -0.157219   | 0.127018    | 0.898926 | 0.984151 |
| gene1476 | gene1476 | SACOL1507 | gi 57650036 ref NC_002951.2 :1548626-1548827 | q1 | q2 | OK     | 0        | 11.4737 | 1.79769e+30 | 1.79769e+30 | 0.209916 | 0.842707 |
| gene1477 | gene1477 | SACOL1508 | gi 57650036 ref NC_002951.2 :1548855-1548981 | q1 | q2 | NOTEST | 0        | 0       | 0           | 0           | 1        | 1        |
| gene1478 | gene1478 | ndk       | gi 57650036 ref NC_002951.2 :1549035-1549485 | q1 | q2 | OK     | 477.206  | 58.8786 | -3.0188     | 2.16082     | 0.03071  | 0.604847 |
| gene1479 | gene1479 | SACOL1510 | gi 57650036 ref NC_002951.2 :1549576-1550536 | q1 | q2 | OK     | 129.079  | 93.9079 | -0.458935   | 0.445768    | 0.655765 | 0.978191 |
| gene148  | gene148  | aldA1     | gi 57650036 ref NC_002951.2 :171180-172668   | q1 | q2 | OK     | 1290.68  | 1904.78 | 0.561489    | -0.40568    | 0.684978 | 0.978191 |
| gene1480 | gene1480 | ubiE      | gi 57650036 ref NC_002951.2 :1550537-1551263 | q1 | q2 | OK     | 278.059  | 134.935 | -1.04313    | 1.00955     | 0.312713 | 0.927653 |
| gene1481 | gene1481 | SACOL1512 | gi 57650036 ref NC_002951.2 :1551265-1551838 | q1 | q2 | OK     | 126.54   | 74.6967 | -0.760478   | 0.552655    | 0.5805   | 0.977168 |
| gene1482 | gene1482 | hup       | gi 57650036 ref NC_002951.2 :1552268-1552541 | q1 | q2 | OK     | 33574.9  | 1985.51 | -4.0798     | 3.3189      | 0.000904 | 0.281629 |
| gene1483 | gene1483 | gpsA      | gi 57650036 ref NC_002951.2 :1552711-1553710 | q1 | q2 | OK     | 172.723  | 72.0808 | -1.26078    | 1.18148     | 0.237414 | 0.876849 |
| gene1484 | gene1484 | engA      | gi 57650036 ref NC_002951.2 :1553726-1555037 | q1 | q2 | OK     | 149.488  | 85.4803 | -0.806363   | 0.787886    | 0.430764 | 0.956269 |
| gene1485 | gene1485 | rpsA      | gi 57650036 ref NC_002951.2 :1555258-1556434 | q1 | q2 | OK     | 852.712  | 335.853 | -1.34423    | 1.07009     | 0.284579 | 0.921417 |
| gene1486 | gene1486 | cmk       | gi 57650036 ref NC_002951.2 :1557145-1557805 | q1 | q2 | OK     | 75.8673  | 46.6971 | -0.700145   | 0.464513    | 0.64228  | 0.978191 |
| gene1487 | gene1487 | ansA      | gi 57650036 ref NC_002951.2 :1557881-1558850 | q1 | q2 | OK     | 31.2354  | 26.6005 | -0.231726   | 0.1457      | 0.884158 | 0.984151 |
| gene1488 | gene1488 | SACOL1520 | gi 57650036 ref NC_002951.2 :1558964-1559951 | q1 | q2 | OK     | 184.112  | 74.2069 | -1.31096    | 1.22982     | 0.218766 | 0.850833 |
| gene1489 | gene1489 | SACOL1521 | gi 57650036 ref NC_002951.2 :1560111-1560228 | q1 | q2 | OK     | 0        | 309.066 | 1.79769e+30 | 1.79769e+30 | 0.206623 | 0.842707 |
| gene149  | gene149  | SACOL0155 | gi 57650036 ref NC_002951.2 :173313-174273   | q1 | q2 | OK     | 59.7534  | 87.2488 | 0.546113    | -0.46788    | 0.639869 | 0.978191 |
| gene1490 | gene1490 | SACOL1522 | gi 57650036 ref NC_002951.2 :1560352-1561813 | q1 | q2 | OK     | 868.642  | 559.554 | -0.634485   | 0.474035    | 0.635475 | 0.978191 |
| gene1491 | gene1491 | recQ2     | gi 57650036 ref NC_002951.2 :1561965-1564288 | q1 | q2 | OK     | 43.408   | 79.5837 | 0.874512    | -0.66704    | 0.504746 | 0.963286 |
| gene1492 | gene1492 | SACOL1524 | gi 57650036 ref NC_002951.2 :1561965-1564288 | q1 | q2 | OK     | 59.0745  | 57.9335 | -0.0281371  | 0.016996    | 0.98644  | 0.997969 |
| gene1493 | gene1493 | fer       | gi 57650036 ref NC_002951.2 :1564395-1564644 | q1 | q2 | OK     | 322.904  | 130.314 | -1.30911    | 0.739049    | 0.459877 | 0.956269 |
| gene1494 | gene1494 | SACOL1526 | gi 57650036 ref NC_002951.2 :1564749-1565295 | q1 | q2 | OK     | 137.785  | 84.6087 | -0.703545   | 0.516614    | 0.605425 | 0.978191 |
| gene1495 | gene1495 | SACOL1528 | gi 57650036 ref NC_002951.2 :1565891-1566806 | q1 | q2 | OK     | 4.01627  | 31.1585 | 2.9557      | -1.57793    | 0.114582 | 0.836663 |
| gene1496 | gene1496 | SACOL1529 | gi 57650036 ref NC_002951.2 :1566820-1567898 | q1 | q2 | OK     | 7.89515  | 36.2616 | 2.19941     | -0.38288    | 0.70181  | 0.978191 |
| gene1497 | gene1497 | SACOL1530 | gi 57650036 ref NC_002951.2 :1566820-1567898 | q1 | q2 | OK     | 0.651827 | 29.1283 | 5.48179     | -2.24389    | 0.02484  | 0.598406 |
| gene1498 | gene1498 | SACOL1531 | gi 57650036 ref NC_002951.2 :1568015-1568933 | q1 | q2 | OK     | 2.15326  | 29.5947 | 3.78074     | -1.94212    | 0.052122 | 0.688888 |
| gene1499 | gene1499 | SACOL1532 | gi 57650036 ref NC_002951.2 :1569023-1572048 | q1 | q2 | OK     | 16.3007  | 46.2503 | 1.50453     | -1.11084    | 0.266639 | 0.902533 |
| gene15   | gene15   | dnaB      | gi 57650036 ref NC_002951.2 :20786-22187     | q1 | q2 | OK     | 125.18   | 70.755  | -0.823102   | 0.804928    | 0.420861 | 0.949284 |
| gene150  | gene150  | SACOL0156 | gi 57650036 ref NC_002951.2 :174334-174538   | q1 | q2 | OK     | 1789.06  | 166.587 | -3.42485    | 2.05496     | 0.039883 | 0.641477 |

|          |          |           |                                              |    |    |          |         |         |           |          |          |          |
|----------|----------|-----------|----------------------------------------------|----|----|----------|---------|---------|-----------|----------|----------|----------|
| gene1500 | gene1500 | SACOL1533 | gi 57650036 ref NC_002951.2 :1569023-1572048 | q1 | q2 | OK       | 13.879  | 57.3287 | 2.04636   | -0.8663  | 0.386328 | 0.940893 |
| gene1501 | gene1501 | srrB      | gi 57650036 ref NC_002951.2 :1572352-1574810 | q1 | q2 | OK       | 66.3846 | 37.1584 | -0.837159 | 0.447882 | 0.654238 | 0.978191 |
| gene1502 | gene1502 | srrA      | gi 57650036 ref NC_002951.2 :1572352-1574810 | q1 | q2 | OK       | 506.798 | 105.187 | -2.26846  | 1.59636  | 0.110408 | 0.829058 |
| gene1503 | gene1503 | rluB      | gi 57650036 ref NC_002951.2 :1574942-1576939 | q1 | q2 | OK       | 89.2783 | 73.8088 | -0.274517 | 0.178113 | 0.858634 | 0.984151 |
| gene1504 | gene1504 | scpB      | gi 57650036 ref NC_002951.2 :1574942-1576939 | q1 | q2 | OK       | 61.5149 | 57.1686 | -0.105714 | 0.046521 | 0.962895 | 0.989588 |
| gene1505 | gene1505 | scpA      | gi 57650036 ref NC_002951.2 :1574942-1576939 | q1 | q2 | OK       | 94.5334 | 48.8459 | -0.952588 | 0.558574 | 0.576453 | 0.976548 |
| gene1506 | gene1506 | SACOL1539 | gi 57650036 ref NC_002951.2 :1577030-1577537 | q1 | q2 | OK       | 19.5864 | 41.6912 | 1.08989   | -0.58474 | 0.558724 | 0.976548 |
| gene1507 | gene1507 | xerD      | gi 57650036 ref NC_002951.2 :1577614-1578502 | q1 | q2 | OK       | 64.6213 | 44.1834 | -0.548506 | 0.401146 | 0.688313 | 0.978191 |
| gene1508 | gene1508 | SACOL1541 | gi 57650036 ref NC_002951.2 :1578550-1579000 | q1 | q2 | OK       | 551.563 | 107.878 | -2.35412  | 1.84862  | 0.064513 | 0.724467 |
| gene1509 | gene1509 | SACOL1542 | gi 57650036 ref NC_002951.2 :1579104-1579647 | q1 | q2 | OK       | 40.1184 | 46.9076 | 0.225555  | -0.13125 | 0.895578 | 0.984151 |
| gene151  | gene151  | SACOL0157 | gi 57650036 ref NC_002951.2 :174716-175229   | q1 | q2 | OK       | 506.843 | 73.2335 | -2.79096  | 2.11692  | 0.034267 | 0.621406 |
| gene1510 | gene1510 | SACOL1543 | gi 57650036 ref NC_002951.2 :1579728-1580637 | q1 | q2 | OK       | 206.623 | 83.4848 | -1.30742  | 1.22983  | 0.21876  | 0.850833 |
| gene1511 | gene1511 | SACOL1544 | gi 57650036 ref NC_002951.2 :1580852-1581101 | q1 | q2 | OK       | 16.3496 | 58.9518 | 1.85028   | -0.84037 | 0.4007   | 0.940909 |
| gene1512 | gene1512 | SACOL1545 | gi 57650036 ref NC_002951.2 :1581116-1581872 | q1 | q2 | OK       | 17.6532 | 48.4595 | 1.45685   | -0.86556 | 0.386733 | 0.940893 |
| gene1513 | gene1513 | proC      | gi 57650036 ref NC_002951.2 :1582013-1582829 | q1 | q2 | OK       | 126.201 | 51.0411 | -1.30599  | 1.04123  | 0.297767 | 0.924214 |
| gene1514 | gene1514 | SACOL1548 | gi 57650036 ref NC_002951.2 :1582933-1583854 | q1 | q2 | OK       | 44.7178 | 37.2008 | -0.265515 | 0.179209 | 0.857774 | 0.984151 |
| gene1515 | gene1515 | zwf       | gi 57650036 ref NC_002951.2 :1584166-1585651 | q1 | q2 | OK       | 291.771 | 175.537 | -0.733065 | 0.640271 | 0.521996 | 0.963286 |
| gene1516 | gene1516 | SACOL1550 | gi 57650036 ref NC_002951.2 :1585853-1586747 | q1 | q2 | OK       | 84.7533 | 78.1167 | -0.117639 | 0.103664 | 0.917436 | 0.984151 |
| gene1517 | gene1517 | malA      | gi 57650036 ref NC_002951.2 :1586829-1588479 | q1 | q2 | OK       | 33.8437 | 60.1161 | 0.828866  | -0.7416  | 0.458328 | 0.956269 |
| gene1518 | gene1518 | malR      | gi 57650036 ref NC_002951.2 :1588494-1589514 | q1 | q2 | OK       | 5.36424 | 30.1531 | 2.49086   | -1.37893 | 0.167915 | 0.842707 |
| gene1519 | gene1519 | SACOL1553 | gi 57650036 ref NC_002951.2 :1589707-1590079 | q1 | q2 | OK       | 2065.1  | 320.197 | -2.68918  | 2.37686  | 0.017461 | 0.500083 |
| gene152  | gene152  | SACOL0158 | gi 57650036 ref NC_002951.2 :175570-178057   | q1 | q2 | OK       | 84.1421 | 52.6043 | -0.677648 | 0.560376 | 0.575223 | 0.976548 |
| gene1520 | gene1520 | gnd       | gi 57650036 ref NC_002951.2 :1590297-1591704 | q1 | q2 | OK       | 632.474 | 245.048 | -1.36794  | 1.10381  | 0.269675 | 0.905515 |
| gene1521 | gene1521 | SACOL1555 | gi 57650036 ref NC_002951.2 :1591771-1592905 | q1 | q2 | OK       | 101.359 | 138.473 | 0.450137  | -0.44361 | 0.657328 | 0.978191 |
| gene1522 | gene1522 | SACOL1556 | gi 57650036 ref NC_002951.2 :1593167-1593347 | q1 | q2 | OK       | 15.3063 | 27.03   | 0.820438  | -0.33201 | 0.73988  | 0.978191 |
| gene1523 | gene1523 | SACOL1557 | gi 57650036 ref NC_002951.2 :1593473-1594454 | q1 | q2 | OK       | 142.421 | 66.428  | -1.1003   | 1.01163  | 0.311717 | 0.927653 |
| gene1524 | gene1524 | SACOL1558 | gi 57650036 ref NC_002951.2 :1594467-1594905 | q1 | q2 | OK       | 130.089 | 93.5027 | -0.476418 | 0.310911 | 0.755868 | 0.978191 |
| gene1525 | gene1525 | SACOL1559 | gi 57650036 ref NC_002951.2 :1594977-1595076 | q1 | q2 | NOTEST 0 |         | 0       | 0         | 0        | 1        | 1        |
| gene1526 | gene1526 | SACOL1560 | gi 57650036 ref NC_002951.2 :1595255-1596530 | q1 | q2 | OK       | 158.263 | 81.0441 | -0.965545 | 0.939342 | 0.347555 | 0.93284  |
| gene1527 | gene1527 | SACOL1561 | gi 57650036 ref NC_002951.2 :1596542-1598518 | q1 | q2 | OK       | 121.072 | 55.6328 | -1.12186  | 0.745141 | 0.456186 | 0.956269 |
| gene1528 | gene1528 | SACOL1562 | gi 57650036 ref NC_002951.2 :1596542-1598518 | q1 | q2 | OK       | 121.044 | 69.4857 | -0.800746 | 0.564247 | 0.572586 | 0.976548 |
| gene1529 | gene1529 | lpdA      | gi 57650036 ref NC_002951.2 :1598533-1599955 | q1 | q2 | OK       | 105.875 | 83.7912 | -0.337496 | 0.333839 | 0.738501 | 0.978191 |
| gene153  | gene153  | SACOL0159 | gi 57650036 ref NC_002951.2 :175570-178057   | q1 | q2 | OK       | 85.6953 | 58.1691 | -0.558963 | 0.287655 | 0.773611 | 0.980484 |

|          |          |           |                                              |    |    |    |         |         |              |              |          |          |
|----------|----------|-----------|----------------------------------------------|----|----|----|---------|---------|--------------|--------------|----------|----------|
| gene1530 | gene1530 | recN      | gi 57650036 ref NC_002951.2 :1600105-1601785 | q1 | q2 | OK | 155.613 | 96.4458 | -0.69017     | 0.653519     | 0.513422 | 0.963286 |
| gene1531 | gene1531 | argR      | gi 57650036 ref NC_002951.2 :1601800-1602253 | q1 | q2 | OK | 259.217 | 71.1207 | -1.86582     | 1.33413      | 0.18216  | 0.842707 |
| gene1532 | gene1532 | ispA      | gi 57650036 ref NC_002951.2 :1602684-1605104 | q1 | q2 | OK | 167.73  | 110.424 | -0.603081    | 0.368922     | 0.712186 | 0.978191 |
| gene1533 | gene1533 | xseB      | gi 57650036 ref NC_002951.2 :1602684-1605104 | q1 | q2 | OK | 177.416 | 65.3284 | -1.44135     | 0.202333     | 0.839656 | 0.984151 |
| gene1534 | gene1534 | xseA      | gi 57650036 ref NC_002951.2 :1602684-1605104 | q1 | q2 | OK | 113.856 | 90.0662 | -0.338152    | 0.230288     | 0.817868 | 0.984151 |
| gene1535 | gene1535 | nusB      | gi 57650036 ref NC_002951.2 :1605120-1605510 | q1 | q2 | OK | 159.997 | 218.047 | 0.4466       | -0.32178     | 0.747621 | 0.978191 |
| gene1536 | gene1536 | SACOL1570 | gi 57650036 ref NC_002951.2 :1605569-1605932 | q1 | q2 | OK | 128.865 | 216.098 | 0.745828     | -0.49727     | 0.619002 | 0.978191 |
| gene1537 | gene1537 | accC      | gi 57650036 ref NC_002951.2 :1605946-1607766 | q1 | q2 | OK | 118.648 | 75.0892 | -0.660012    | 0.563207     | 0.573294 | 0.976548 |
| gene1538 | gene1538 | accB      | gi 57650036 ref NC_002951.2 :1605946-1607766 | q1 | q2 | OK | 99.828  | 48.2673 | -1.0484      | 0.387952     | 0.698052 | 0.978191 |
| gene1539 | gene1539 | SACOL1573 | gi 57650036 ref NC_002951.2 :1608120-1609141 | q1 | q2 | OK | 80.6306 | 46.3727 | -0.79805     | 0.657544     | 0.510831 | 0.963286 |
| gene154  | gene154  | SACOL0160 | gi 57650036 ref NC_002951.2 :178069-179101   | q1 | q2 | OK | 95.6515 | 34.4535 | -1.47314     | 1.15173      | 0.249432 | 0.889805 |
| gene1540 | gene1540 | SACOL1574 | gi 57650036 ref NC_002951.2 :1609249-1609591 | q1 | q2 | OK | 5.19546 | 0       | -1.79769e+30 | -1.79769e+30 | 0.197167 | 0.842707 |
| gene1541 | gene1541 | SACOL1575 | gi 57650036 ref NC_002951.2 :1609646-1610237 | q1 | q2 | OK | 6.39513 | 25.871  | 2.01629      | -1.01134     | 0.311855 | 0.927653 |
| gene1542 | gene1542 | SACOL1576 | gi 57650036 ref NC_002951.2 :1610243-1613127 | q1 | q2 | OK | 9.59843 | 63.189  | 2.7188       | -1.23833     | 0.215595 | 0.850298 |
| gene1543 | gene1543 | SACOL1577 | gi 57650036 ref NC_002951.2 :1610243-1613127 | q1 | q2 | OK | 8.67884 | 49.0356 | 2.49826      | -1.3651      | 0.17222  | 0.842707 |
| gene1544 | gene1544 | SACOL1578 | gi 57650036 ref NC_002951.2 :1613131-1614490 | q1 | q2 | OK | 2.06944 | 23.7984 | 3.52355      | -1.89458     | 0.058148 | 0.702279 |
| gene1545 | gene1545 | SACOL1579 | gi 57650036 ref NC_002951.2 :1614543-1617039 | q1 | q2 | OK | 2.81999 | 32.1947 | 3.51306      | -2.25315     | 0.02425  | 0.592692 |
| gene1546 | gene1546 | SACOL1580 | gi 57650036 ref NC_002951.2 :1617073-1617457 | q1 | q2 | OK | 7.88948 | 56.6593 | 2.84431      | -1.39059     | 0.164349 | 0.842707 |
| gene1547 | gene1547 | SACOL1581 | gi 57650036 ref NC_002951.2 :1617468-1617729 | q1 | q2 | OK | 56.7816 | 159.562 | 1.49063      | -0.77235     | 0.439908 | 0.956269 |
| gene1548 | gene1548 | SACOL1582 | gi 57650036 ref NC_002951.2 :1617733-1618789 | q1 | q2 | OK | 6.41531 | 27.7005 | 2.11032      | -1.1823      | 0.237087 | 0.876849 |
| gene1549 | gene1549 | SACOL1583 | gi 57650036 ref NC_002951.2 :1618849-1619941 | q1 | q2 | OK | 11.3148 | 43.7976 | 1.95264      | -1.22321     | 0.221249 | 0.852509 |
| gene155  | gene155  | SACOL0161 | gi 57650036 ref NC_002951.2 :179317-179677   | q1 | q2 | OK | 865.072 | 429.963 | -1.00861     | 0.98445      | 0.324894 | 0.927653 |
| gene1550 | gene1550 | SACOL1584 | gi 57650036 ref NC_002951.2 :1620115-1620418 | q1 | q2 | OK | 21.2706 | 27.1578 | 0.352506     | -0.16425     | 0.869531 | 0.984151 |
| gene1551 | gene1551 | SACOL1585 | gi 57650036 ref NC_002951.2 :1620431-1620752 | q1 | q2 | OK | 22.3653 | 32.7987 | 0.552376     | -0.26397     | 0.791805 | 0.982631 |
| gene1552 | gene1552 | SACOL1586 | gi 57650036 ref NC_002951.2 :1620902-1621187 | q1 | q2 | OK | 2.77767 | 20.555  | 2.88754      | -1.23201     | 0.217946 | 0.850298 |
| gene1553 | gene1553 | efp       | gi 57650036 ref NC_002951.2 :1621581-1622139 | q1 | q2 | OK | 509.039 | 150.016 | -1.76266     | 1.61929      | 0.105384 | 0.816834 |
| gene1554 | gene1554 | SACOL1588 | gi 57650036 ref NC_002951.2 :1622164-1623226 | q1 | q2 | OK | 122.547 | 112.689 | -0.120992    | 0.119878     | 0.90458  | 0.984151 |
| gene1555 | gene1555 | SACOL1589 | gi 57650036 ref NC_002951.2 :1623330-1623912 | q1 | q2 | OK | 50.6571 | 44.7074 | -0.180252    | 0.108716     | 0.913428 | 0.984151 |
| gene1556 | gene1556 | SACOL1590 | gi 57650036 ref NC_002951.2 :1623925-1624144 | q1 | q2 | OK | 202.144 | 30.5185 | -2.72763     | 1.29453      | 0.195482 | 0.842707 |
| gene1557 | gene1557 | SACOL1591 | gi 57650036 ref NC_002951.2 :1624207-1625038 | q1 | q2 | OK | 94.2473 | 91.5733 | -0.0415242   | 0.037107     | 0.9704   | 0.993106 |
| gene1558 | gene1558 | SACOL1592 | gi 57650036 ref NC_002951.2 :1625195-1625582 | q1 | q2 | OK | 220.932 | 94.598  | -1.22372     | 0.811614     | 0.417013 | 0.948553 |
| gene1559 | gene1559 | SACOL1593 | gi 57650036 ref NC_002951.2 :1625946-1628758 | q1 | q2 | OK | 326.886 | 46.7484 | -2.8058      | 1.72097      | 0.085256 | 0.767592 |
| gene156  | gene156  | SACOL0162 | gi 57650036 ref NC_002951.2 :179849-180875   | q1 | q2 | OK | 10.3821 | 30.6901 | 1.56368      | -0.91281     | 0.361344 | 0.93284  |

|          |          |           |                                              |    |    |    |         |         |             |           |          |          |
|----------|----------|-----------|----------------------------------------------|----|----|----|---------|---------|-------------|-----------|----------|----------|
| gene1560 | gene1560 | SACOL1594 | gi 57650036 ref NC_002951.2 :1625946-1628758 | q1 | q2 | OK | 331.035 | 47.2708 | -2.80796    | 1.6441    | 0.100156 | 0.815096 |
| gene1561 | gene1561 | gcvT      | gi 57650036 ref NC_002951.2 :1628777-1629869 | q1 | q2 | OK | 200.715 | 39.8477 | -2.33258    | 1.91231   | 0.055836 | 0.696046 |
| gene1562 | gene1562 | aroK      | gi 57650036 ref NC_002951.2 :1630027-1630552 | q1 | q2 | OK | 66.5969 | 71.9008 | 0.110552    | -0.06964  | 0.944478 | 0.987716 |
| gene1563 | gene1563 | SACOL1597 | gi 57650036 ref NC_002951.2 :1630784-1631282 | q1 | q2 | OK | 3.1117  | 15.7454 | 2.33916     | -1.07309  | 0.283231 | 0.919393 |
| gene1564 | gene1564 | SACOL1598 | gi 57650036 ref NC_002951.2 :1631485-1632221 | q1 | q2 | OK | 0       | 14.7868 | 1.79769e+30 | 1.79769e+ | 0.220765 | 0.852509 |
| gene1565 | gene1565 | comGC     | gi 57650036 ref NC_002951.2 :1631485-1632221 | q1 | q2 | OK | 4.37768 | 28.5442 | 2.70496     | -1.0314   | 0.302354 | 0.927424 |
| gene1566 | gene1566 | SACOL1600 | gi 57650036 ref NC_002951.2 :1632234-1634251 | q1 | q2 | OK | 4.53726 | 24.9733 | 2.46049     | -1.08235  | 0.279095 | 0.914891 |
| gene1567 | gene1567 | SACOL1601 | gi 57650036 ref NC_002951.2 :1632234-1634251 | q1 | q2 | OK | 5.11694 | 24.6658 | 2.26916     | -0.97833  | 0.32791  | 0.927653 |
| gene1568 | gene1568 | SACOL1602 | gi 57650036 ref NC_002951.2 :1634302-1637882 | q1 | q2 | OK | 202.719 | 53.3786 | -1.92515    | 0.637705  | 0.523666 | 0.963286 |
| gene1569 | gene1569 | SACOL1603 | gi 57650036 ref NC_002951.2 :1634302-1637882 | q1 | q2 | OK | 147.752 | 118.916 | -0.313237   | 0.068781  | 0.945164 | 0.987716 |
| gene157  | gene157  | SACOL0163 | gi 57650036 ref NC_002951.2 :181260-182511   | q1 | q2 | OK | 53.8481 | 37.9714 | -0.50398    | 0.410572  | 0.681386 | 0.978191 |
| gene1570 | gene1570 | glk       | gi 57650036 ref NC_002951.2 :1634302-1637882 | q1 | q2 | OK | 135.706 | 124.379 | -0.125746   | 0.067546  | 0.946147 | 0.987716 |
| gene1571 | gene1571 | SACOL1605 | gi 57650036 ref NC_002951.2 :1634302-1637882 | q1 | q2 | OK | 33.5974 | 60.2549 | 0.84273     | -0.04735  | 0.962234 | 0.989588 |
| gene1572 | gene1572 | SACOL1606 | gi 57650036 ref NC_002951.2 :1634302-1637882 | q1 | q2 | OK | 76.2873 | 87.5579 | 0.198795    | -0.10666  | 0.915057 | 0.984151 |
| gene1573 | gene1573 | SACOL1607 | gi 57650036 ref NC_002951.2 :1637893-1638433 | q1 | q2 | OK | 68.8467 | 53.5097 | -0.363588   | 0.224842  | 0.822102 | 0.984151 |
| gene1574 | gene1574 | rpmG      | gi 57650036 ref NC_002951.2 :1638641-1638791 | q1 | q2 | OK | 5893.29 | 331.367 | -4.15257    | 2.17971   | 0.029279 | 0.604847 |
| gene1575 | gene1575 | pbp3      | gi 57650036 ref NC_002951.2 :1638903-1640979 | q1 | q2 | OK | 232.931 | 132.851 | -0.81009    | 0.69094   | 0.489603 | 0.963286 |
| gene1576 | gene1576 | sodA2     | gi 57650036 ref NC_002951.2 :1641099-1641699 | q1 | q2 | OK | 424.475 | 173.901 | -1.28741    | 1.23663   | 0.216225 | 0.850298 |
| gene1577 | gene1577 | SACOL1611 | gi 57650036 ref NC_002951.2 :1641974-1643235 | q1 | q2 | OK | 93.9973 | 20.8186 | -2.17475    | 0.722962  | 0.469703 | 0.956269 |
| gene1578 | gene1578 | SACOL1612 | gi 57650036 ref NC_002951.2 :1641974-1643235 | q1 | q2 | OK | 35.356  | 42.7938 | 0.275444    | -0.16803  | 0.866562 | 0.984151 |
| gene1579 | gene1579 | SACOL1613 | gi 57650036 ref NC_002951.2 :1643276-1644062 | q1 | q2 | OK | 59.2499 | 43.7737 | -0.436749   | 0.29652   | 0.766833 | 0.978191 |
| gene158  | gene158  | SACOL0164 | gi 57650036 ref NC_002951.2 :182957-190133   | q1 | q2 | OK | 48.2366 | 43.0975 | -0.162522   | 0.13967   | 0.888921 | 0.984151 |
| gene1580 | gene1580 | nfo       | gi 57650036 ref NC_002951.2 :1644187-1645078 | q1 | q2 | OK | 148.505 | 65.6215 | -1.17827    | 1.04702   | 0.29509  | 0.924214 |
| gene1581 | gene1581 | SACOL1615 | gi 57650036 ref NC_002951.2 :1645087-1646434 | q1 | q2 | OK | 108.57  | 49.2669 | -1.13994    | 1.06534   | 0.28672  | 0.921417 |
| gene1582 | gene1582 | SACOL1616 | gi 57650036 ref NC_002951.2 :1646547-1647648 | q1 | q2 | OK | 99.815  | 77.0738 | -0.373017   | 0.359933  | 0.718897 | 0.978191 |
| gene1583 | gene1583 | SACOL1617 | gi 57650036 ref NC_002951.2 :1647650-1648328 | q1 | q2 | OK | 59.2298 | 84.8819 | 0.519134    | -0.36905  | 0.712092 | 0.978191 |
| gene1584 | gene1584 | rpoD      | gi 57650036 ref NC_002951.2 :1648458-1649565 | q1 | q2 | OK | 267.67  | 155.661 | -0.782046   | 0.737515  | 0.460809 | 0.956269 |
| gene1585 | gene1585 | dnaG      | gi 57650036 ref NC_002951.2 :1649788-1651588 | q1 | q2 | OK | 126.965 | 92.4252 | -0.458072   | 0.437959  | 0.661416 | 0.978191 |
| gene1586 | gene1586 | SACOL1620 | gi 57650036 ref NC_002951.2 :1651648-1652467 | q1 | q2 | OK | 87.8954 | 88.4857 | 0.00965772  | -0.00839  | 0.993306 | 0.998638 |
| gene1587 | gene1587 | SACOL1621 | gi 57650036 ref NC_002951.2 :1652477-1653017 | q1 | q2 | OK | 18.2241 | 32.8153 | 0.848519    | -0.45173  | 0.651462 | 0.978191 |
| gene1588 | gene1588 | glyS      | gi 57650036 ref NC_002951.2 :1653435-1654827 | q1 | q2 | OK | 439.677 | 300.238 | -0.550335   | 0.447287  | 0.654668 | 0.978191 |
| gene1589 | gene1589 | SACOL1623 | gi 57650036 ref NC_002951.2 :1654976-1655729 | q1 | q2 | OK | 133.553 | 79.2766 | -0.752441   | 0.652084  | 0.514347 | 0.963286 |
| gene159  | gene159  | SACOL0165 | gi 57650036 ref NC_002951.2 :190145-190790   | q1 | q2 | OK | 105.433 | 31.3036 | -1.75192    | 1.16189   | 0.245279 | 0.885853 |

|          |          |           |                                              |    |    |          |         |         |           |          |          |          |
|----------|----------|-----------|----------------------------------------------|----|----|----------|---------|---------|-----------|----------|----------|----------|
| gene1590 | gene1590 | era       | gi 57650036 ref NC_002951.2 :1655750-1656650 | q1 | q2 | OK       | 102.002 | 82.0286 | -0.314396 | 0.288912 | 0.772649 | 0.980274 |
| gene1591 | gene1591 | cdd       | gi 57650036 ref NC_002951.2 :1656650-1657055 | q1 | q2 | OK       | 61.9441 | 70.3165 | 0.182897  | -0.10464 | 0.916663 | 0.984151 |
| gene1592 | gene1592 | dgkA      | gi 57650036 ref NC_002951.2 :1657065-1657410 | q1 | q2 | OK       | 132.198 | 59.1852 | -1.15939  | 0.658001 | 0.510538 | 0.963286 |
| gene1593 | gene1593 | SACOL1627 | gi 57650036 ref NC_002951.2 :1657412-1657880 | q1 | q2 | OK       | 161.449 | 164.383 | 0.0259786 | -0.02038 | 0.983743 | 0.997969 |
| gene1594 | gene1594 | SACOL1628 | gi 57650036 ref NC_002951.2 :1657880-1658801 | q1 | q2 | OK       | 114.857 | 151.379 | 0.398319  | -0.39084 | 0.695919 | 0.978191 |
| gene1595 | gene1595 | SACOL1629 | gi 57650036 ref NC_002951.2 :1659131-1659830 | q1 | q2 | OK       | 588.6   | 535.431 | -0.136587 | 0.120631 | 0.903984 | 0.984151 |
| gene1596 | gene1596 | SACOL1630 | gi 57650036 ref NC_002951.2 :1659846-1660836 | q1 | q2 | OK       | 510.598 | 430.109 | -0.247487 | 0.206598 | 0.836324 | 0.984151 |
| gene1597 | gene1597 | SACOL1631 | gi 57650036 ref NC_002951.2 :1660853-1661561 | q1 | q2 | OK       | 500.936 | 389.113 | -0.364437 | 0.335774 | 0.737041 | 0.978191 |
| gene1598 | gene1598 | rpsU      | gi 57650036 ref NC_002951.2 :1661780-1661957 | q1 | q2 | OK       | 39632.5 | 649.809 | -5.93052  | 3.74825  | 0.000178 | 0.14798  |
| gene1599 | gene1599 | SACOL1633 | gi 57650036 ref NC_002951.2 :1662249-1663596 | q1 | q2 | OK       | 93.5493 | 51.0815 | -0.872926 | 0.822897 | 0.410567 | 0.940909 |
| gene16   | gene16   | SACOL0017 | gi 57650036 ref NC_002951.2 :22262-22355     | q1 | q2 | NOTEST 0 |         | 0       | 0         | 0        | 1        | 1        |
| gene160  | gene160  | SACOL0166 | gi 57650036 ref NC_002951.2 :191117-191612   | q1 | q2 | OK       | 489.979 | 67.9835 | -2.84946  | 2.12215  | 0.033825 | 0.620038 |
| gene1600 | gene1600 | SACOL1634 | gi 57650036 ref NC_002951.2 :1663602-1664355 | q1 | q2 | OK       | 66.5746 | 46.8621 | -0.506549 | 0.347971 | 0.727862 | 0.978191 |
| gene1601 | gene1601 | prmA      | gi 57650036 ref NC_002951.2 :1664356-1665295 | q1 | q2 | OK       | 135.555 | 63.552  | -1.09287  | 0.979416 | 0.327374 | 0.927653 |
| gene1602 | gene1602 | dnaJ      | gi 57650036 ref NC_002951.2 :1665298-1666438 | q1 | q2 | OK       | 77.153  | 91.1484 | 0.240496  | -0.23199 | 0.816547 | 0.984151 |
| gene1603 | gene1603 | dnaK      | gi 57650036 ref NC_002951.2 :1666573-1668406 | q1 | q2 | OK       | 252.439 | 214.76  | -0.233208 | 0.193634 | 0.846463 | 0.984151 |
| gene1604 | gene1604 | grpE      | gi 57650036 ref NC_002951.2 :1668474-1669101 | q1 | q2 | OK       | 110.137 | 213.737 | 0.956536  | -0.839   | 0.401468 | 0.940909 |
| gene1605 | gene1605 | hrcA      | gi 57650036 ref NC_002951.2 :1669132-1670110 | q1 | q2 | OK       | 52.3817 | 72.1244 | 0.461425  | -0.37567 | 0.707165 | 0.978191 |
| gene1606 | gene1606 | SACOL1640 | gi 57650036 ref NC_002951.2 :1670209-1671367 | q1 | q2 | OK       | 12.8016 | 30.2192 | 1.23914   | -0.75751 | 0.448743 | 0.956269 |
| gene1607 | gene1607 | lepA      | gi 57650036 ref NC_002951.2 :1671896-1673720 | q1 | q2 | OK       | 60.0613 | 40.6131 | -0.56449  | 0.54213  | 0.587729 | 0.978191 |
| gene1608 | gene1608 | rpsT      | gi 57650036 ref NC_002951.2 :1674065-1674317 | q1 | q2 | OK       | 2214.32 | 119.189 | -4.21554  | 2.8015   | 0.005087 | 0.446636 |
| gene1609 | gene1609 | holA      | gi 57650036 ref NC_002951.2 :1674361-1675336 | q1 | q2 | OK       | 25.0162 | 29.3323 | 0.22963   | -0.14275 | 0.886492 | 0.984151 |
| gene161  | gene161  | argB      | gi 57650036 ref NC_002951.2 :191866-192631   | q1 | q2 | OK       | 3.15631 | 15.2383 | 2.27139   | -1.10956 | 0.26719  | 0.902533 |
| gene1610 | gene1610 | SACOL1644 | gi 57650036 ref NC_002951.2 :1675392-1677540 | q1 | q2 | OK       | 6.32689 | 44.1844 | 2.80397   | -1.93899 | 0.052503 | 0.688888 |
| gene1611 | gene1611 | SACOL1645 | gi 57650036 ref NC_002951.2 :1677598-1678030 | q1 | q2 | OK       | 109.255 | 67.3656 | -0.69762  | 0.428078 | 0.668594 | 0.978191 |
| gene1612 | gene1612 | comEA     | gi 57650036 ref NC_002951.2 :1678151-1678838 | q1 | q2 | OK       | 10.1409 | 30.7914 | 1.60235   | -0.85872 | 0.390497 | 0.940909 |
| gene1613 | gene1613 | SACOL1647 | gi 57650036 ref NC_002951.2 :1678877-1679594 | q1 | q2 | OK       | 228.15  | 51.2056 | -2.15561  | 1.67834  | 0.093281 | 0.79098  |
| gene1614 | gene1614 | SACOL1648 | gi 57650036 ref NC_002951.2 :1679596-1679950 | q1 | q2 | OK       | 205.306 | 187.36  | -0.131961 | 0.089542 | 0.928651 | 0.987716 |
| gene1615 | gene1615 | SACOL1649 | gi 57650036 ref NC_002951.2 :1679950-1681094 | q1 | q2 | OK       | 124.115 | 78.2453 | -0.665598 | 0.461621 | 0.644353 | 0.978191 |
| gene1616 | gene1616 | nadD      | gi 57650036 ref NC_002951.2 :1679950-1681094 | q1 | q2 | OK       | 95.572  | 64.093  | -0.576421 | 0.349697 | 0.726566 | 0.978191 |
| gene1617 | gene1617 | SACOL1651 | gi 57650036 ref NC_002951.2 :1681096-1681387 | q1 | q2 | OK       | 23.6572 | 24.2955 | 0.0384053 | -0.01772 | 0.985863 | 0.997969 |
| gene1618 | gene1618 | aroE      | gi 57650036 ref NC_002951.2 :1681390-1682197 | q1 | q2 | OK       | 55.6526 | 35.1947 | -0.661092 | 0.436432 | 0.662523 | 0.978191 |
| gene1619 | gene1619 | SACOL1653 | gi 57650036 ref NC_002951.2 :1682210-1683311 | q1 | q2 | OK       | 55.9938 | 49.8104 | -0.168821 | 0.138404 | 0.889921 | 0.984151 |

|          |          |           |                                              |    |    |    |          |         |             |          |          |          |
|----------|----------|-----------|----------------------------------------------|----|----|----|----------|---------|-------------|----------|----------|----------|
| gene162  | gene162  | argJ      | gi 57650036 ref NC_002951.2 :192646-193888   | q1 | q2 | OK | 3.35592  | 20.3437 | 2.5998      | -1.3994  | 0.161692 | 0.842707 |
| gene1620 | gene1620 | SACOL1654 | gi 57650036 ref NC_002951.2 :1683311-1683839 | q1 | q2 | OK | 89.7938  | 30.8965 | -1.53917    | 0.923237 | 0.355884 | 0.93284  |
| gene1621 | gene1621 | mtn       | gi 57650036 ref NC_002951.2 :1683858-1684545 | q1 | q2 | OK | 42.8682  | 28.6967 | -0.57902    | 0.345532 | 0.729694 | 0.978191 |
| gene1622 | gene1622 | SACOL1656 | gi 57650036 ref NC_002951.2 :1684858-1685128 | q1 | q2 | OK | 16.1017  | 20.3803 | 0.339961    | -0.15051 | 0.880363 | 0.984151 |
| gene1623 | gene1623 | SACOL1657 | gi 57650036 ref NC_002951.2 :1685329-1686034 | q1 | q2 | OK | 0.887426 | 31.955  | 5.17027     | -2.46539 | 0.013686 | 0.500083 |
| gene1624 | gene1624 | SACOL1658 | gi 57650036 ref NC_002951.2 :1686495-1687716 | q1 | q2 | OK | 38.3348  | 28.8944 | -0.407865   | 0.289563 | 0.772151 | 0.980274 |
| gene1625 | gene1625 | SACOL1659 | gi 57650036 ref NC_002951.2 :1688004-1689234 | q1 | q2 | OK | 166.613  | 45.0874 | -1.88571    | 1.66272  | 0.096368 | 0.803494 |
| gene1626 | gene1626 | SACOL1660 | gi 57650036 ref NC_002951.2 :1689246-1691360 | q1 | q2 | OK | 134.763  | 49.6405 | -1.44084    | 0.713385 | 0.475608 | 0.956269 |
| gene1627 | gene1627 | SACOL1661 | gi 57650036 ref NC_002951.2 :1689246-1691360 | q1 | q2 | OK | 157.051  | 66.914  | -1.23085    | 0.984025 | 0.325103 | 0.927653 |
| gene1628 | gene1628 | SACOL1662 | gi 57650036 ref NC_002951.2 :1691373-1691823 | q1 | q2 | OK | 91.2997  | 27.6611 | -1.72275    | 0.975568 | 0.329279 | 0.927653 |
| gene1629 | gene1629 | SACOL1663 | gi 57650036 ref NC_002951.2 :1691824-1693559 | q1 | q2 | OK | 106.07   | 46.55   | -1.18816    | 0.925136 | 0.354895 | 0.93284  |
| gene163  | gene163  | argC      | gi 57650036 ref NC_002951.2 :193899-194931   | q1 | q2 | OK | 2.90654  | 27.6126 | 3.24795     | -1.7208  | 0.085288 | 0.767592 |
| gene1630 | gene1630 | SACOL1664 | gi 57650036 ref NC_002951.2 :1691824-1693559 | q1 | q2 | OK | 62.6526  | 35.001  | -0.839979   | 0.435435 | 0.663246 | 0.978191 |
| gene1631 | gene1631 | greA      | gi 57650036 ref NC_002951.2 :1693884-1694361 | q1 | q2 | OK | 538.02   | 111.262 | -2.2737     | 1.83265  | 0.066855 | 0.73141  |
| gene1632 | gene1632 | udk       | gi 57650036 ref NC_002951.2 :1694388-1696280 | q1 | q2 | OK | 113.096  | 75.4002 | -0.584908   | 0.334354 | 0.738112 | 0.978191 |
| gene1633 | gene1633 | SACOL1667 | gi 57650036 ref NC_002951.2 :1694388-1696280 | q1 | q2 | OK | 94.6038  | 52.1236 | -0.859962   | 0.683681 | 0.494176 | 0.963286 |
| gene1634 | gene1634 | SACOL1668 | gi 57650036 ref NC_002951.2 :1696291-1697215 | q1 | q2 | OK | 65.2645  | 64.9804 | -0.00629219 | 0.005136 | 0.995902 | 0.998672 |
| gene1635 | gene1635 | SACOL1669 | gi 57650036 ref NC_002951.2 :1697217-1697856 | q1 | q2 | OK | 26.2247  | 31.9467 | 0.284739    | -0.16147 | 0.871723 | 0.984151 |
| gene1636 | gene1636 | SACOL1670 | gi 57650036 ref NC_002951.2 :1698140-1698449 | q1 | q2 | OK | 1957.48  | 342.262 | -2.51582    | 2.1565   | 0.031045 | 0.604847 |
| gene1637 | gene1637 | SACOL1671 | gi 57650036 ref NC_002951.2 :1698463-1698892 | q1 | q2 | OK | 371.809  | 597.377 | 0.684081    | -0.66346 | 0.507038 | 0.963286 |
| gene1638 | gene1638 | SACOL1672 | gi 57650036 ref NC_002951.2 :1698895-1699156 | q1 | q2 | OK | 511.034  | 941.418 | 0.881416    | -0.69486 | 0.487143 | 0.963286 |
| gene1639 | gene1639 | alaS      | gi 57650036 ref NC_002951.2 :1699218-1701849 | q1 | q2 | OK | 54.6567  | 54.7983 | 0.00373332  | -0.00367 | 0.997069 | 0.998672 |
| gene164  | gene164  | rocD1     | gi 57650036 ref NC_002951.2 :194969-196154   | q1 | q2 | OK | 1.77744  | 45.1091 | 4.66554     | -2.59332 | 0.009505 | 0.499638 |
| gene1640 | gene1640 | SACOL1674 | gi 57650036 ref NC_002951.2 :1702191-1704669 | q1 | q2 | OK | 59.2188  | 44.1834 | -0.422551   | 0.41717  | 0.676554 | 0.978191 |
| gene1641 | gene1641 | SACOL1675 | gi 57650036 ref NC_002951.2 :1704670-1705339 | q1 | q2 | OK | 50.8351  | 33.6687 | -0.594414   | 0.363499 | 0.716232 | 0.978191 |
| gene1642 | gene1642 | mnmA      | gi 57650036 ref NC_002951.2 :1705800-1706919 | q1 | q2 | OK | 143.134  | 96.9158 | -0.562565   | 0.554543 | 0.579207 | 0.976548 |
| gene1643 | gene1643 | SACOL1677 | gi 57650036 ref NC_002951.2 :1706919-1708062 | q1 | q2 | OK | 79.2245  | 72.8229 | -0.121554   | 0.115509 | 0.908042 | 0.984151 |
| gene1644 | gene1644 | SACOL1678 | gi 57650036 ref NC_002951.2 :1708373-1709387 | q1 | q2 | OK | 228.9    | 165.069 | -0.471648   | 0.456087 | 0.648327 | 0.978191 |
| gene1645 | gene1645 | SACOL1679 | gi 57650036 ref NC_002951.2 :1709623-1709770 | q1 | q2 | OK | 1766.99  | 2196.91 | 0.314184    | -0.16709 | 0.867296 | 0.984151 |
| gene1646 | gene1646 | SACOL1680 | gi 57650036 ref NC_002951.2 :1709809-1709992 | q1 | q2 | OK | 295.006  | 223.424 | -0.400956   | 0.196138 | 0.844502 | 0.984151 |
| gene1647 | gene1647 | SACOL1681 | gi 57650036 ref NC_002951.2 :1710091-1710514 | q1 | q2 | OK | 236.68   | 298.011 | 0.332432    | -0.29203 | 0.770264 | 0.980274 |
| gene1648 | gene1648 | SACOL1682 | gi 57650036 ref NC_002951.2 :1710598-1711873 | q1 | q2 | OK | 145.667  | 78.2395 | -0.896705   | 0.874818 | 0.381673 | 0.940893 |
| gene1649 | gene1649 | SACOL1683 | gi 57650036 ref NC_002951.2 :1712033-1712807 | q1 | q2 | OK | 46.9586  | 41.2677 | -0.186378   | 0.120742 | 0.903896 | 0.984151 |

|          |          |           |                                              |    |    |    |         |         |           |          |          |          |
|----------|----------|-----------|----------------------------------------------|----|----|----|---------|---------|-----------|----------|----------|----------|
| gene165  | gene165  | brnQ1     | gi 57650036 ref NC_002951.2 :196406-197762   | q1 | q2 | OK | 46.0257 | 26.6504 | -0.788284 | 0.597737 | 0.550015 | 0.974547 |
| gene1650 | gene1650 | aspS      | gi 57650036 ref NC_002951.2 :1713267-1715034 | q1 | q2 | OK | 67.5386 | 38.6069 | -0.806851 | 0.764688 | 0.444458 | 0.956269 |
| gene1651 | gene1651 | hisS      | gi 57650036 ref NC_002951.2 :1715049-1716312 | q1 | q2 | OK | 28.771  | 36.3762 | 0.33838   | -0.2414  | 0.809248 | 0.984151 |
| gene1652 | gene1652 | SACOL1687 | gi 57650036 ref NC_002951.2 :1716772-1718097 | q1 | q2 | OK | 142.424 | 98.4286 | -0.533046 | 0.431468 | 0.666128 | 0.978191 |
| gene1653 | gene1653 | SACOL1688 | gi 57650036 ref NC_002951.2 :1716772-1718097 | q1 | q2 | OK | 208.117 | 112.152 | -0.891939 | 0.499267 | 0.617591 | 0.978191 |
| gene1654 | gene1654 | relA2     | gi 57650036 ref NC_002951.2 :1718108-1720298 | q1 | q2 | OK | 133.068 | 106.413 | -0.322491 | 0.293803 | 0.768908 | 0.980004 |
| gene1655 | gene1655 | apt       | gi 57650036 ref NC_002951.2 :1720725-1721244 | q1 | q2 | OK | 132.277 | 47.1138 | -1.48934  | 0.977063 | 0.328538 | 0.927653 |
| gene1656 | gene1656 | recJ      | gi 57650036 ref NC_002951.2 :1721265-1723539 | q1 | q2 | OK | 34.691  | 27.3785 | -0.341516 | 0.313213 | 0.754119 | 0.978191 |
| gene1657 | gene1657 | SACOL1692 | gi 57650036 ref NC_002951.2 :1723741-1726021 | q1 | q2 | OK | 208.473 | 71.5748 | -1.54234  | 1.36069  | 0.173611 | 0.842707 |
| gene1658 | gene1658 | yajC      | gi 57650036 ref NC_002951.2 :1726295-1726556 | q1 | q2 | OK | 943.994 | 89.089  | -3.40546  | 2.16331  | 0.030518 | 0.604847 |
| gene1659 | gene1659 | tgt       | gi 57650036 ref NC_002951.2 :1726574-1727714 | q1 | q2 | OK | 94.4017 | 67.2026 | -0.490295 | 0.466458 | 0.640888 | 0.978191 |
| gene166  | gene166  | entB      | gi 57650036 ref NC_002951.2 :198037-198535   | q1 | q2 | OK | 132.247 | 25.1257 | -2.39601  | 1.45115  | 0.146738 | 0.842707 |
| gene1660 | gene1660 | queA      | gi 57650036 ref NC_002951.2 :1727736-1728762 | q1 | q2 | OK | 63.0909 | 44.7199 | -0.496516 | 0.390936 | 0.695844 | 0.978191 |
| gene1661 | gene1661 | ruvB      | gi 57650036 ref NC_002951.2 :1728763-1729768 | q1 | q2 | OK | 121.099 | 67.3155 | -0.847173 | 0.785366 | 0.432239 | 0.956269 |
| gene1662 | gene1662 | ruvA      | gi 57650036 ref NC_002951.2 :1729799-1730402 | q1 | q2 | OK | 98.524  | 40.9659 | -1.26605  | 0.831948 | 0.405438 | 0.940909 |
| gene1663 | gene1663 | SACOL1698 | gi 57650036 ref NC_002951.2 :1730415-1730874 | q1 | q2 | OK | 59.7763 | 28.6717 | -1.05995  | 0.584906 | 0.558611 | 0.976548 |
| gene1664 | gene1664 | obgE      | gi 57650036 ref NC_002951.2 :1730883-1732176 | q1 | q2 | OK | 137.023 | 77.542  | -0.82137  | 0.803408 | 0.421739 | 0.949284 |
| gene1665 | gene1665 | rpmA      | gi 57650036 ref NC_002951.2 :1732530-1732815 | q1 | q2 | OK | 3177.65 | 405.961 | -2.96855  | 2.47165  | 0.013449 | 0.500083 |
| gene1666 | gene1666 | SACOL1701 | gi 57650036 ref NC_002951.2 :1732826-1733147 | q1 | q2 | OK | 264.317 | 131.195 | -1.01056  | 0.638913 | 0.522879 | 0.963286 |
| gene1667 | gene1667 | rplU      | gi 57650036 ref NC_002951.2 :1733152-1733461 | q1 | q2 | OK | 749.77  | 538.437 | -0.47767  | 0.451401 | 0.6517   | 0.978191 |
| gene1668 | gene1668 | SACOL1703 | gi 57650036 ref NC_002951.2 :1733627-1735000 | q1 | q2 | OK | 59.0482 | 33.3599 | -0.823779 | 0.367836 | 0.712995 | 0.978191 |
| gene1669 | gene1669 | mreC      | gi 57650036 ref NC_002951.2 :1733627-1735000 | q1 | q2 | OK | 73.1094 | 38.8753 | -0.911203 | 0.612234 | 0.540383 | 0.965716 |
| gene167  | gene167  | ipdC      | gi 57650036 ref NC_002951.2 :198661-200302   | q1 | q2 | OK | 102.628 | 34.6986 | -1.56447  | 1.41277  | 0.157723 | 0.842707 |
| gene1670 | gene1670 | SACOL1705 | gi 57650036 ref NC_002951.2 :1735392-1735866 | q1 | q2 | OK | 14.4836 | 36.2606 | 1.32399   | -0.68011 | 0.496435 | 0.963286 |
| gene1671 | gene1671 | SACOL1706 | gi 57650036 ref NC_002951.2 :1736339-1736624 | q1 | q2 | OK | 797.191 | 75.0256 | -3.40947  | 2.19981  | 0.02782  | 0.604847 |
| gene1672 | gene1672 | radC      | gi 57650036 ref NC_002951.2 :1736691-1738082 | q1 | q2 | OK | 7.37517 | 54.6704 | 2.89001   | -1.28356 | 0.199297 | 0.842707 |
| gene1673 | gene1673 | SACOL1708 | gi 57650036 ref NC_002951.2 :1736691-1738082 | q1 | q2 | OK | 7.4964  | 31.1693 | 2.05585   | -0.86025 | 0.389649 | 0.940909 |
| gene1674 | gene1674 | folC      | gi 57650036 ref NC_002951.2 :1738351-1739623 | q1 | q2 | OK | 116.541 | 68.9511 | -0.757192 | 0.737801 | 0.460635 | 0.956269 |
| gene1675 | gene1675 | valS      | gi 57650036 ref NC_002951.2 :1739635-1742266 | q1 | q2 | OK | 123.155 | 83.4056 | -0.562259 | 0.507263 | 0.61197  | 0.978191 |
| gene1676 | gene1676 | SACOL1711 | gi 57650036 ref NC_002951.2 :1742668-1743229 | q1 | q2 | OK | 210.796 | 73.436  | -1.52129  | 1.17159  | 0.241361 | 0.880985 |
| gene1677 | gene1677 | SACOL1712 | gi 57650036 ref NC_002951.2 :1743451-1744525 | q1 | q2 | OK | 84.1455 | 71.5861 | -0.233207 | 0.218323 | 0.827178 | 0.984151 |
| gene1678 | gene1678 | hemL1     | gi 57650036 ref NC_002951.2 :1744720-1746007 | q1 | q2 | OK | 76.732  | 52.7089 | -0.541782 | 0.504361 | 0.614007 | 0.978191 |
| gene1679 | gene1679 | hemB      | gi 57650036 ref NC_002951.2 :1746054-1747029 | q1 | q2 | OK | 38.9456 | 51.5982 | 0.40586   | -0.29072 | 0.771262 | 0.980274 |

|          |          |           |                                              |    |    |        |          |         |           |          |          |          |
|----------|----------|-----------|----------------------------------------------|----|----|--------|----------|---------|-----------|----------|----------|----------|
| gene168  | gene168  | SACOL0174 | gi 57650036 ref NC_002951.2 :200495-202621   | q1 | q2 | NOTEST | 0        | 0       | 0         | 1        | 1        |          |
| gene1680 | gene1680 | hemD      | gi 57650036 ref NC_002951.2 :1747031-1747700 | q1 | q2 | OK     | 9.11195  | 32.5827 | 1.83827   | -0.97737 | 0.328387 | 0.927653 |
| gene1681 | gene1681 | hemC      | gi 57650036 ref NC_002951.2 :1747721-1748648 | q1 | q2 | OK     | 37.3518  | 44.7069 | 0.259318  | -0.17589 | 0.860379 | 0.984151 |
| gene1682 | gene1682 | SACOL1718 | gi 57650036 ref NC_002951.2 :1748689-1749505 | q1 | q2 | OK     | 44.7111  | 27.6889 | -0.691323 | 0.433058 | 0.664972 | 0.978191 |
| gene1683 | gene1683 | hemA      | gi 57650036 ref NC_002951.2 :1749526-1750873 | q1 | q2 | OK     | 381.613  | 298.777 | -0.353041 | 0.292267 | 0.770082 | 0.980274 |
| gene1684 | gene1684 | engB      | gi 57650036 ref NC_002951.2 :1751089-1751680 | q1 | q2 | OK     | 33.7198  | 48.8962 | 0.536127  | -0.31576 | 0.752184 | 0.978191 |
| gene1685 | gene1685 | clpX      | gi 57650036 ref NC_002951.2 :1751833-1753096 | q1 | q2 | OK     | 750.513  | 236.641 | -1.66518  | 1.3591   | 0.174115 | 0.842707 |
| gene1686 | gene1686 | tig       | gi 57650036 ref NC_002951.2 :1753246-1754548 | q1 | q2 | OK     | 764.174  | 193.004 | -1.98527  | 1.63649  | 0.101736 | 0.815096 |
| gene1687 | gene1687 | SACOL1723 | gi 57650036 ref NC_002951.2 :1754710-1755640 | q1 | q2 | OK     | 63.5006  | 47.7786 | -0.410404 | 0.311552 | 0.755381 | 0.978191 |
| gene1688 | gene1688 | SACOL1724 | gi 57650036 ref NC_002951.2 :1755658-1756267 | q1 | q2 | OK     | 55.9774  | 94.407  | 0.75405   | -0.51564 | 0.606108 | 0.978191 |
| gene1689 | gene1689 | rplT      | gi 57650036 ref NC_002951.2 :1756408-1756765 | q1 | q2 | OK     | 464.704  | 56.3337 | -3.04424  | 2.0213   | 0.043248 | 0.650674 |
| gene169  | gene169  | SACOL0175 | gi 57650036 ref NC_002951.2 :200495-202621   | q1 | q2 | OK     | 36.1009  | 45.2991 | 0.32745   | -0.30133 | 0.763166 | 0.978191 |
| gene1690 | gene1690 | rpmI      | gi 57650036 ref NC_002951.2 :1756811-1757012 | q1 | q2 | OK     | 107.531  | 45.8948 | -1.22835  | 0.556143 | 0.578113 | 0.976548 |
| gene1691 | gene1691 | infC      | gi 57650036 ref NC_002951.2 :1757040-1757568 | q1 | q2 | OK     | 120.66   | 92.9955 | -0.375719 | 0.267893 | 0.788782 | 0.982219 |
| gene1692 | gene1692 | SACOL1728 | gi 57650036 ref NC_002951.2 :1757796-1759290 | q1 | q2 | OK     | 84.5742  | 108.192 | 0.355307  | -0.35006 | 0.726298 | 0.978191 |
| gene1693 | gene1693 | thrS      | gi 57650036 ref NC_002951.2 :1759715-1761653 | q1 | q2 | OK     | 67.7793  | 51.8176 | -0.387404 | 0.382767 | 0.701892 | 0.978191 |
| gene1694 | gene1694 | dnaI      | gi 57650036 ref NC_002951.2 :1762065-1764386 | q1 | q2 | OK     | 192.96   | 91.1419 | -1.08212  | 0.711633 | 0.476692 | 0.956269 |
| gene1695 | gene1695 | SACOL1732 | gi 57650036 ref NC_002951.2 :1762065-1764386 | q1 | q2 | OK     | 106.131  | 62.084  | -0.773552 | 0.512043 | 0.608621 | 0.978191 |
| gene1696 | gene1696 | nrdR      | gi 57650036 ref NC_002951.2 :1764386-1764857 | q1 | q2 | OK     | 293.153  | 91.2283 | -1.6841   | 1.28651  | 0.198266 | 0.842707 |
| gene1697 | gene1697 | gapA2     | gi 57650036 ref NC_002951.2 :1765066-1766092 | q1 | q2 | OK     | 956.213  | 303.269 | -1.65674  | 1.35339  | 0.175932 | 0.842707 |
| gene1698 | gene1698 | coaE      | gi 57650036 ref NC_002951.2 :1766261-1766885 | q1 | q2 | OK     | 146.171  | 106.518 | -0.456567 | 0.389631 | 0.696809 | 0.978191 |
| gene1699 | gene1699 | fpg       | gi 57650036 ref NC_002951.2 :1766900-1767773 | q1 | q2 | OK     | 87.494   | 65.0371 | -0.427921 | 0.359256 | 0.719403 | 0.978191 |
| gene17   | gene17   | purA      | gi 57650036 ref NC_002951.2 :22464-23748     | q1 | q2 | OK     | 87.8267  | 51.6055 | -0.767135 | 0.71496  | 0.474634 | 0.956269 |
| gene170  | gene170  | SACOL0176 | gi 57650036 ref NC_002951.2 :203206-205158   | q1 | q2 | OK     | 66.206   | 37.6194 | -0.815483 | 0.567501 | 0.570374 | 0.976548 |
| gene1700 | gene1700 | polA      | gi 57650036 ref NC_002951.2 :1767788-1770419 | q1 | q2 | OK     | 122.445  | 69.9865 | -0.806987 | 0.736879 | 0.461196 | 0.956269 |
| gene1701 | gene1701 | SACOL1738 | gi 57650036 ref NC_002951.2 :1770712-1772200 | q1 | q2 | OK     | 10.4741  | 25.6549 | 1.29241   | -0.81195 | 0.41682  | 0.948553 |
| gene1702 | gene1702 | SACOL1739 | gi 57650036 ref NC_002951.2 :1772698-1775064 | q1 | q2 | OK     | 90.3974  | 63.57   | -0.507934 | 0.383373 | 0.701443 | 0.978191 |
| gene1703 | gene1703 | phoP      | gi 57650036 ref NC_002951.2 :1772698-1775064 | q1 | q2 | OK     | 117.584  | 131.663 | 0.163157  | -0.09258 | 0.926238 | 0.9868   |
| gene1704 | gene1704 | icd       | gi 57650036 ref NC_002951.2 :1775453-1776722 | q1 | q2 | OK     | 1723.1   | 1106.17 | -0.639434 | 0.464643 | 0.642187 | 0.978191 |
| gene1705 | gene1705 | gltA      | gi 57650036 ref NC_002951.2 :1776770-1777892 | q1 | q2 | OK     | 1008.34  | 625.073 | -0.689889 | 0.524083 | 0.600221 | 0.978191 |
| gene1706 | gene1706 | SACOL1743 | gi 57650036 ref NC_002951.2 :1778239-1779601 | q1 | q2 | OK     | 646.029  | 168.853 | -1.93584  | 1.61445  | 0.10643  | 0.818963 |
| gene1707 | gene1707 | SACOL1744 | gi 57650036 ref NC_002951.2 :1779633-1781285 | q1 | q2 | OK     | 0.598164 | 15.8174 | 4.72483   | -2.36799 | 0.017885 | 0.500083 |
| gene1708 | gene1708 | pyk       | gi 57650036 ref NC_002951.2 :1781925-1783683 | q1 | q2 | OK     | 425.706  | 77.4538 | -2.45845  | 2.10668  | 0.035146 | 0.621406 |



|          |          |           |                                              |    |    |          |         |         |             |           |          |          |
|----------|----------|-----------|----------------------------------------------|----|----|----------|---------|---------|-------------|-----------|----------|----------|
| gene1709 | gene1709 | pfkA      | gi 57650036 ref NC_002951.2 :1783704-1784673 | q1 | q2 | OK       | 135.258 | 101.028 | -0.420952   | 0.41264   | 0.679871 | 0.978191 |
| gene171  | gene171  | murQ      | gi 57650036 ref NC_002951.2 :203206-205158   | q1 | q2 | OK       | 46.7377 | 60.0856 | 0.362433    | -0.23514  | 0.814104 | 0.984151 |
| gene1710 | gene1710 | accA      | gi 57650036 ref NC_002951.2 :1784941-1786743 | q1 | q2 | OK       | 195.128 | 52.6587 | -1.88967    | 1.32613   | 0.184796 | 0.842707 |
| gene1711 | gene1711 | accD      | gi 57650036 ref NC_002951.2 :1784941-1786743 | q1 | q2 | OK       | 159.597 | 46.9282 | -1.7659     | 1.07453   | 0.282587 | 0.918498 |
| gene1712 | gene1712 | SACOL1749 | gi 57650036 ref NC_002951.2 :1786937-1788167 | q1 | q2 | OK       | 94.4494 | 75.3474 | -0.325985   | 0.318984  | 0.749738 | 0.978191 |
| gene1713 | gene1713 | dnaE      | gi 57650036 ref NC_002951.2 :1788616-1791814 | q1 | q2 | OK       | 77.8468 | 59.2437 | -0.393975   | 0.368181  | 0.712738 | 0.978191 |
| gene1714 | gene1714 | SACOL1751 | gi 57650036 ref NC_002951.2 :1791834-1792776 | q1 | q2 | OK       | 97.8225 | 63.0227 | -0.634294   | 0.557456  | 0.577216 | 0.976548 |
| gene1715 | gene1715 | SACOL1752 | gi 57650036 ref NC_002951.2 :1793036-1794335 | q1 | q2 | OK       | 47.6707 | 58.5773 | 0.29724     | -0.26339  | 0.792254 | 0.982631 |
| gene1716 | gene1716 | SACOL1753 | gi 57650036 ref NC_002951.2 :1794539-1794953 | q1 | q2 | OK       | 1170.93 | 78.5417 | -3.89805    | 2.78488   | 0.005355 | 0.446636 |
| gene1717 | gene1717 | SACOL1754 | gi 57650036 ref NC_002951.2 :1795257-1795946 | q1 | q2 | OK       | 306.131 | 222.408 | -0.460941   | 0.453956  | 0.64986  | 0.978191 |
| gene1718 | gene1718 | pepQ      | gi 57650036 ref NC_002951.2 :1796120-1797176 | q1 | q2 | OK       | 61.3303 | 36.7727 | -0.737966   | 0.560751  | 0.574967 | 0.976548 |
| gene1719 | gene1719 | SACOL1757 | gi 57650036 ref NC_002951.2 :1797269-1797368 | q1 | q2 | NOTEST 0 |         | 0       | 0           | 0         | 1        | 1        |
| gene172  | gene172  | SACOL0178 | gi 57650036 ref NC_002951.2 :205169-206624   | q1 | q2 | OK       | 93.6709 | 59.6151 | -0.651923   | 0.636479  | 0.524464 | 0.963286 |
| gene1720 | gene1720 | ald2      | gi 57650036 ref NC_002951.2 :1797491-1798610 | q1 | q2 | OK       | 645.297 | 122.414 | -2.39819    | 2.07564   | 0.037928 | 0.634589 |
| gene1721 | gene1721 | SACOL1759 | gi 57650036 ref NC_002951.2 :1798750-1799251 | q1 | q2 | OK       | 2633.4  | 625.209 | -2.07452    | 1.73075   | 0.083497 | 0.76604  |
| gene1722 | gene1722 | ackA      | gi 57650036 ref NC_002951.2 :1799496-1800699 | q1 | q2 | OK       | 358.115 | 170.627 | -1.06958    | 0.957009  | 0.338563 | 0.93058  |
| gene1723 | gene1723 | SACOL1761 | gi 57650036 ref NC_002951.2 :1800786-1801734 | q1 | q2 | OK       | 179.281 | 357.918 | 0.997405    | -0.92929  | 0.352738 | 0.93284  |
| gene1724 | gene1724 | tpx       | gi 57650036 ref NC_002951.2 :1801856-1802351 | q1 | q2 | OK       | 1432.19 | 650.748 | -1.13805    | 0.997389  | 0.318576 | 0.927653 |
| gene1725 | gene1725 | SACOL1763 | gi 57650036 ref NC_002951.2 :1802448-1803219 | q1 | q2 | OK       | 15.9988 | 128.564 | 3.00645     | -1.99257  | 0.046308 | 0.652239 |
| gene1726 | gene1726 | thiI      | gi 57650036 ref NC_002951.2 :1803262-1805625 | q1 | q2 | OK       | 17.5085 | 51.1297 | 1.5461      | -0.93489  | 0.349844 | 0.93284  |
| gene1727 | gene1727 | SACOL1765 | gi 57650036 ref NC_002951.2 :1803262-1805625 | q1 | q2 | OK       | 12.1207 | 43.8086 | 1.85374     | -0.92322  | 0.355892 | 0.93284  |
| gene1728 | gene1728 | SACOL1766 | gi 57650036 ref NC_002951.2 :1805782-1805923 | q1 | q2 | OK       | 0       | 88.1378 | 1.79769e+30 | 1.79769e+ | 0.209916 | 0.842707 |
| gene1729 | gene1729 | SACOL1767 | gi 57650036 ref NC_002951.2 :1805996-1807691 | q1 | q2 | OK       | 393.123 | 106.037 | -1.89041    | 1.62049   | 0.105127 | 0.816834 |
| gene173  | gene173  | SACOL0179 | gi 57650036 ref NC_002951.2 :206626-207502   | q1 | q2 | OK       | 60.5713 | 32.7588 | -0.886753   | 0.608457  | 0.542884 | 0.968798 |
| gene1730 | gene1730 | SACOL1768 | gi 57650036 ref NC_002951.2 :1807827-1808292 | q1 | q2 | OK       | 37.9876 | 29.1849 | -0.38031    | 0.203901  | 0.838431 | 0.984151 |
| gene1731 | gene1731 | rpsD      | gi 57650036 ref NC_002951.2 :1808535-1809138 | q1 | q2 | OK       | 673.904 | 62.3284 | -3.43458    | 2.56972   | 0.010178 | 0.500083 |
| gene1732 | gene1732 | SACOL1770 | gi 57650036 ref NC_002951.2 :1809353-1810097 | q1 | q2 | OK       | 1.23138 | 34.8162 | 4.82141     | -2.35262  | 0.018642 | 0.510701 |
| gene1733 | gene1733 | SACOL1771 | gi 57650036 ref NC_002951.2 :1810176-1810623 | q1 | q2 | OK       | 43.8696 | 61.1454 | 0.479021    | -0.27166  | 0.785881 | 0.982219 |
| gene1734 | gene1734 | SACOL1772 | gi 57650036 ref NC_002951.2 :1810736-1813488 | q1 | q2 | OK       | 38.0541 | 38.981  | 0.0347185   | -0.01957  | 0.984388 | 0.997969 |
| gene1735 | gene1735 | serA      | gi 57650036 ref NC_002951.2 :1810736-1813488 | q1 | q2 | OK       | 60.7692 | 48.946  | -0.312149   | 0.253672  | 0.799749 | 0.984151 |
| gene1736 | gene1736 | SACOL1774 | gi 57650036 ref NC_002951.2 :1813637-1814768 | q1 | q2 | OK       | 73.4456 | 55.5868 | -0.401933   | 0.359343  | 0.719338 | 0.978191 |
| gene1737 | gene1737 | SACOL1775 | gi 57650036 ref NC_002951.2 :1814874-1816341 | q1 | q2 | OK       | 66.1394 | 37.1787 | -0.831035   | 0.738962  | 0.45993  | 0.956269 |
| gene1738 | gene1738 | SACOL1776 | gi 57650036 ref NC_002951.2 :1816468-1817086 | q1 | q2 | OK       | 98.5688 | 22.3252 | -2.14246    | 1.33582   | 0.181608 | 0.842707 |

|          |          |           |                                              |    |    |          |         |         |             |          |          |          |
|----------|----------|-----------|----------------------------------------------|----|----|----------|---------|---------|-------------|----------|----------|----------|
| gene1739 | gene1739 | SACOL1777 | gi 57650036 ref NC_002951.2 :1817257-1818532 | q1 | q2 | OK       | 96.705  | 71.9532 | -0.426531   | 0.417791 | 0.6761   | 0.978191 |
| gene174  | gene174  | SACOL0180 | gi 57650036 ref NC_002951.2 :208189-210979   | q1 | q2 | OK       | 25.1358 | 33.2645 | 0.404236    | -0.3848  | 0.700385 | 0.978191 |
| gene1740 | gene1740 | tyrS      | gi 57650036 ref NC_002951.2 :1818625-1819888 | q1 | q2 | OK       | 41.5125 | 46.2526 | 0.155989    | -0.12658 | 0.899275 | 0.984151 |
| gene1741 | gene1741 | SACOL1779 | gi 57650036 ref NC_002951.2 :1820269-1821175 | q1 | q2 | OK       | 33.493  | 39.7248 | 0.246181    | -0.16036 | 0.872596 | 0.984151 |
| gene1742 | gene1742 | SACOL1781 | gi 57650036 ref NC_002951.2 :1821377-1824065 | q1 | q2 | OK       | 8.06088 | 34.5766 | 2.10079     | -1.54787 | 0.121654 | 0.842707 |
| gene1743 | gene1743 | fhs       | gi 57650036 ref NC_002951.2 :1824398-1826066 | q1 | q2 | OK       | 695.501 | 222.828 | -1.64212    | 1.2962   | 0.194908 | 0.842707 |
| gene1744 | gene1744 | acs       | gi 57650036 ref NC_002951.2 :1826505-1828212 | q1 | q2 | OK       | 747.342 | 628.996 | -0.248718   | 0.183415 | 0.854472 | 0.984151 |
| gene1745 | gene1745 | acuA      | gi 57650036 ref NC_002951.2 :1828380-1829013 | q1 | q2 | OK       | 103.827 | 52.781  | -0.976098   | 0.682885 | 0.49468  | 0.963286 |
| gene1746 | gene1746 | acuC      | gi 57650036 ref NC_002951.2 :1829037-1830207 | q1 | q2 | OK       | 129.101 | 94.1567 | -0.45537    | 0.449858 | 0.652813 | 0.978191 |
| gene1747 | gene1747 | ccpA      | gi 57650036 ref NC_002951.2 :1830304-1831294 | q1 | q2 | OK       | 691.76  | 170.5   | -2.0205     | 1.75411  | 0.079412 | 0.758524 |
| gene1748 | gene1748 | SACOL1787 | gi 57650036 ref NC_002951.2 :1831833-1832925 | q1 | q2 | OK       | 276.229 | 78.0689 | -1.82305    | 1.69313  | 0.090431 | 0.784058 |
| gene1749 | gene1749 | SACOL1788 | gi 57650036 ref NC_002951.2 :1833624-1835142 | q1 | q2 | OK       | 297.865 | 531.001 | 0.834057    | -0.66037 | 0.509019 | 0.963286 |
| gene175  | gene175  | SACOL0181 | gi 57650036 ref NC_002951.2 :211183-212026   | q1 | q2 | OK       | 89.6625 | 47.1943 | -0.925892   | 0.708703 | 0.478509 | 0.956269 |
| gene1750 | gene1750 | SACOL1789 | gi 57650036 ref NC_002951.2 :1835215-1835707 | q1 | q2 | OK       | 2709.34 | 1015.64 | -1.41555    | 1.13931  | 0.254574 | 0.890115 |
| gene1751 | gene1751 | murC      | gi 57650036 ref NC_002951.2 :1835780-1837094 | q1 | q2 | OK       | 208.237 | 91.6033 | -1.18475    | 1.1292   | 0.258812 | 0.897383 |
| gene1752 | gene1752 | SACOL1791 | gi 57650036 ref NC_002951.2 :1837117-1840942 | q1 | q2 | OK       | 110.201 | 67.2888 | -0.711699   | 0.613213 | 0.539736 | 0.965252 |
| gene1753 | gene1753 | SACOL1792 | gi 57650036 ref NC_002951.2 :1840962-1841559 | q1 | q2 | OK       | 60.064  | 57.6218 | -0.0598847  | 0.038053 | 0.969646 | 0.992742 |
| gene1754 | gene1754 | SACOL1793 | gi 57650036 ref NC_002951.2 :1841587-1842445 | q1 | q2 | OK       | 56.9026 | 37.5426 | -0.599968   | 0.410949 | 0.68111  | 0.978191 |
| gene1755 | gene1755 | SACOL1794 | gi 57650036 ref NC_002951.2 :1842544-1842856 | q1 | q2 | OK       | 334.892 | 151.692 | -1.14255    | 0.745233 | 0.456131 | 0.956269 |
| gene1756 | gene1756 | pepA1     | gi 57650036 ref NC_002951.2 :1842920-1843997 | q1 | q2 | OK       | 106.126 | 151.787 | 0.51627     | -0.50786 | 0.611554 | 0.978191 |
| gene1757 | gene1757 | SACOL1796 | gi 57650036 ref NC_002951.2 :1844083-1844395 | q1 | q2 | OK       | 1473.09 | 53.8261 | -4.77439    | 3.10122  | 0.001927 | 0.338293 |
| gene1758 | gene1758 | SACOL1797 | gi 57650036 ref NC_002951.2 :1844519-1845296 | q1 | q2 | OK       | 40.9143 | 40.7039 | -0.00743923 | 0.004739 | 0.996218 | 0.998672 |
| gene1759 | gene1759 | trmB      | gi 57650036 ref NC_002951.2 :1845831-1846476 | q1 | q2 | OK       | 335.561 | 122.472 | -1.45412    | 1.34919  | 0.177277 | 0.842707 |
| gene176  | gene176  | SACOL0182 | gi 57650036 ref NC_002951.2 :212027-214050   | q1 | q2 | NOTEST 0 |         | 0       | 0           | 0        | 1        | 1        |
| gene1760 | gene1760 | SACOL1799 | gi 57650036 ref NC_002951.2 :1846490-1847282 | q1 | q2 | OK       | 301.766 | 109.05  | -1.46844    | 1.38936  | 0.164724 | 0.842707 |
| gene1761 | gene1761 | dat       | gi 57650036 ref NC_002951.2 :1847831-1848680 | q1 | q2 | OK       | 289.632 | 214.822 | -0.431081   | 0.416102 | 0.677336 | 0.978191 |
| gene1762 | gene1762 | SACOL1801 | gi 57650036 ref NC_002951.2 :1848683-1850093 | q1 | q2 | OK       | 133.953 | 129.369 | -0.0502363  | 0.048625 | 0.961218 | 0.989588 |
| gene1763 | gene1763 | SACOL1802 | gi 57650036 ref NC_002951.2 :1851012-1851435 | q1 | q2 | OK       | 327.3   | 450.094 | 0.459611    | -0.44089 | 0.659295 | 0.978191 |
| gene1764 | gene1764 | SACOL1803 | gi 57650036 ref NC_002951.2 :1851451-1853805 | q1 | q2 | OK       | 61.9468 | 48.3613 | -0.357176   | 0.182322 | 0.85533  | 0.984151 |
| gene1765 | gene1765 | SACOL1804 | gi 57650036 ref NC_002951.2 :1851451-1853805 | q1 | q2 | OK       | 61.0341 | 41.2043 | -0.566819   | 0.471663 | 0.637167 | 0.978191 |
| gene1766 | gene1766 | SACOL1805 | gi 57650036 ref NC_002951.2 :1854211-1855480 | q1 | q2 | OK       | 31.0578 | 63.0151 | 1.02074     | -0.80902 | 0.418506 | 0.949284 |
| gene1767 | gene1767 | SACOL1806 | gi 57650036 ref NC_002951.2 :1855596-1862157 | q1 | q2 | OK       | 3.7076  | 34.5164 | 3.21872     | -2.38895 | 0.016897 | 0.500083 |
| gene1768 | gene1768 | SACOL1807 | gi 57650036 ref NC_002951.2 :1862482-1862794 | q1 | q2 | OK       | 67.854  | 47.3018 | -0.520541   | 0.267729 | 0.788908 | 0.982219 |

|          |          |           |                                              |    |    |          |          |         |             |           |          |          |
|----------|----------|-----------|----------------------------------------------|----|----|----------|----------|---------|-------------|-----------|----------|----------|
| gene1769 | gene1769 | leuS      | gi 57650036 ref NC_002951.2 :1862815-1865233 | q1 | q2 | OK       | 51.2013  | 41.9667 | -0.286936   | 0.283923  | 0.776469 | 0.981157 |
| gene177  | gene177  | SACOL0183 | gi 57650036 ref NC_002951.2 :212027-214050   | q1 | q2 | NOTEST 0 |          | 0       | 0           | 0         | 1        | 1        |
| gene1770 | gene1770 | SACOL1809 | gi 57650036 ref NC_002951.2 :1865520-1866702 | q1 | q2 | OK       | 58.1706  | 54.5471 | -0.0927876  | 0.081149  | 0.935323 | 0.987716 |
| gene1771 | gene1771 | SACOL1810 | gi 57650036 ref NC_002951.2 :1866811-1868325 | q1 | q2 | OK       | 65.5083  | 55.8791 | -0.229369   | 0.177738  | 0.858929 | 0.984151 |
| gene1772 | gene1772 | SACOL1811 | gi 57650036 ref NC_002951.2 :1866811-1868325 | q1 | q2 | OK       | 67.7646  | 36.8447 | -0.879076   | 0.424357  | 0.671305 | 0.978191 |
| gene1773 | gene1773 | rot       | gi 57650036 ref NC_002951.2 :1868444-1868945 | q1 | q2 | OK       | 564.08   | 433.398 | -0.380206   | 0.370781  | 0.7108   | 0.978191 |
| gene1774 | gene1774 | SACOL1813 | gi 57650036 ref NC_002951.2 :1869365-1870078 | q1 | q2 | OK       | 4.80106  | 33.4649 | 2.80123     | -1.4536   | 0.146058 | 0.842707 |
| gene1775 | gene1775 | SACOL1814 | gi 57650036 ref NC_002951.2 :1870424-1871252 | q1 | q2 | OK       | 197.559  | 123.92  | -0.672868   | 0.659571  | 0.509529 | 0.963286 |
| gene1776 | gene1776 | SACOL1815 | gi 57650036 ref NC_002951.2 :1871254-1871374 | q1 | q2 | OK       | 0        | 463.935 | 1.79769e+30 | 1.79769e+ | 0.20195  | 0.842707 |
| gene1777 | gene1777 | putA      | gi 57650036 ref NC_002951.2 :1871485-1872487 | q1 | q2 | OK       | 343.841  | 73.1062 | -2.23368    | 2.00199   | 0.045285 | 0.650761 |
| gene1778 | gene1778 | ribH      | gi 57650036 ref NC_002951.2 :1872608-1873073 | q1 | q2 | OK       | 18.5521  | 37.7906 | 1.02645     | -0.5343   | 0.593135 | 0.978191 |
| gene1779 | gene1779 | ribBA     | gi 57650036 ref NC_002951.2 :1873085-1874267 | q1 | q2 | OK       | 15.6013  | 38.479  | 1.3024      | -0.84681  | 0.3971   | 0.940909 |
| gene178  | gene178  | SACOL0184 | gi 57650036 ref NC_002951.2 :214314-215907   | q1 | q2 | OK       | 39.308   | 29.8871 | -0.395297   | 0.32356   | 0.746271 | 0.978191 |
| gene1780 | gene1780 | ribE      | gi 57650036 ref NC_002951.2 :1874277-1874910 | q1 | q2 | OK       | 21.9133  | 34.4836 | 0.654101    | -0.36712  | 0.713531 | 0.978191 |
| gene1781 | gene1781 | ribD      | gi 57650036 ref NC_002951.2 :1874916-1875960 | q1 | q2 | OK       | 15.1012  | 47.3421 | 1.64846     | -1.06096  | 0.288708 | 0.921417 |
| gene1782 | gene1782 | SACOL1821 | gi 57650036 ref NC_002951.2 :1876440-1877943 | q1 | q2 | OK       | 17.5305  | 45.2862 | 1.36921     | -1.00114  | 0.316757 | 0.927653 |
| gene1783 | gene1783 | arsR      | gi 57650036 ref NC_002951.2 :1878465-1880072 | q1 | q2 | OK       | 66.1856  | 39.8582 | -0.731638   | 0.221359  | 0.824813 | 0.984151 |
| gene1784 | gene1784 | arsB      | gi 57650036 ref NC_002951.2 :1878465-1880072 | q1 | q2 | OK       | 16.1791  | 29.5896 | 0.870959    | -0.52674  | 0.598374 | 0.978191 |
| gene1785 | gene1785 | arsC      | gi 57650036 ref NC_002951.2 :1880089-1880485 | q1 | q2 | OK       | 30.6874  | 27.7279 | -0.146309   | 0.074106  | 0.940926 | 0.987716 |
| gene1786 | gene1786 | SACOL1825 | gi 57650036 ref NC_002951.2 :1880779-1881634 | q1 | q2 | OK       | 387.017  | 252.658 | -0.615214   | 0.573525  | 0.566289 | 0.976548 |
| gene1787 | gene1787 | SACOL1826 | gi 57650036 ref NC_002951.2 :1881909-1882134 | q1 | q2 | OK       | 326.17   | 179.223 | -0.863869   | 0.473275  | 0.636017 | 0.978191 |
| gene1788 | gene1788 | SACOL1827 | gi 57650036 ref NC_002951.2 :1882332-1882803 | q1 | q2 | OK       | 11.2088  | 28.2112 | 1.33164     | -0.66295  | 0.507366 | 0.963286 |
| gene1789 | gene1789 | SACOL1828 | gi 57650036 ref NC_002951.2 :1882915-1883789 | q1 | q2 | OK       | 45.4239  | 24.6581 | -0.881391   | 0.322527  | 0.747053 | 0.978191 |
| gene179  | gene179  | SACOL0185 | gi 57650036 ref NC_002951.2 :216034-217342   | q1 | q2 | OK       | 43.1385  | 32.1992 | -0.421948   | 0.324108  | 0.745857 | 0.978191 |
| gene1790 | gene1790 | SACOL1829 | gi 57650036 ref NC_002951.2 :1882915-1883789 | q1 | q2 | OK       | 175.897  | 47.295  | -1.89497    | 0.97031   | 0.331892 | 0.927653 |
| gene1791 | gene1791 | SACOL1830 | gi 57650036 ref NC_002951.2 :1884084-1884720 | q1 | q2 | OK       | 6.21541  | 57.0923 | 3.19937     | -1.71774  | 0.085844 | 0.769821 |
| gene1792 | gene1792 | tal       | gi 57650036 ref NC_002951.2 :1885159-1885873 | q1 | q2 | OK       | 1024.46  | 868.65  | -0.238017   | 0.189915  | 0.849376 | 0.984151 |
| gene1793 | gene1793 | crcB      | gi 57650036 ref NC_002951.2 :1886612-1887406 | q1 | q2 | OK       | 18.3628  | 61.443  | 1.74246     | -0.67505  | 0.499644 | 0.963286 |
| gene1794 | gene1794 | SACOL1833 | gi 57650036 ref NC_002951.2 :1886612-1887406 | q1 | q2 | OK       | 57.2947  | 51.7706 | -0.146269   | 0.060795  | 0.951522 | 0.988316 |
| gene1795 | gene1795 | SACOL1834 | gi 57650036 ref NC_002951.2 :1887816-1889426 | q1 | q2 | OK       | 0.308143 | 20.0575 | 6.0244      | -2.97598  | 0.002921 | 0.346711 |
| gene1796 | gene1796 | SACOL1835 | gi 57650036 ref NC_002951.2 :1889488-1890322 | q1 | q2 | OK       | 127.728  | 83.0419 | -0.621166   | 0.567416  | 0.570432 | 0.976548 |
| gene1797 | gene1797 | SACOL1836 | gi 57650036 ref NC_002951.2 :1890533-1891442 | q1 | q2 | OK       | 179.198  | 54.396  | -1.71998    | 1.46053   | 0.144144 | 0.842707 |
| gene1798 | gene1798 | metK      | gi 57650036 ref NC_002951.2 :1891566-1892760 | q1 | q2 | OK       | 83.8656  | 39.7982 | -1.07538    | 0.912593  | 0.361456 | 0.93284  |

|          |          |            |                                              |    |    |        |          |         |             |           |          |          |
|----------|----------|------------|----------------------------------------------|----|----|--------|----------|---------|-------------|-----------|----------|----------|
| gene1799 | gene1799 | pckA       | gi 57650036 ref NC_002951.2 :1893130-1894723 | q1 | q2 | OK     | 880.53   | 308.534 | -1.51294    | 1.1615    | 0.245437 | 0.885853 |
| gene18   | gene18   | SACOL_tRNA | gi 57650036 ref NC_002951.2 :24177-24252     | q1 | q2 | NOTEST | 0        | 0       | 0           | 0         | 1        | 1        |
| gene180  | gene180  | SACOL186   | gi 57650036 ref NC_002951.2 :217347-218511   | q1 | q2 | OK     | 33.1627  | 41.0148 | 0.306583    | -0.2214   | 0.82478  | 0.984151 |
| gene1800 | gene1800 | SACOL1839  | gi 57650036 ref NC_002951.2 :1894858-1895344 | q1 | q2 | OK     | 129.315  | 333.635 | 1.36738     | -1.11566  | 0.264568 | 0.901051 |
| gene1801 | gene1801 | SACOL1840  | gi 57650036 ref NC_002951.2 :1895718-1896949 | q1 | q2 | OK     | 24.1933  | 76.4921 | 1.6607      | -0.91195  | 0.361795 | 0.93284  |
| gene1802 | gene1802 | SACOL1841  | gi 57650036 ref NC_002951.2 :1895718-1896949 | q1 | q2 | OK     | 24.1337  | 110.14  | 2.19021     | -0.93749  | 0.348509 | 0.93284  |
| gene1803 | gene1803 | SACOL1842  | gi 57650036 ref NC_002951.2 :1897008-1898264 | q1 | q2 | OK     | 1490.63  | 292.431 | -2.34976    | 1.45153   | 0.146634 | 0.842707 |
| gene1804 | gene1804 | SACOL1843  | gi 57650036 ref NC_002951.2 :1897008-1898264 | q1 | q2 | OK     | 51.8643  | 68.3356 | 0.397896    | -0.2588   | 0.795791 | 0.984081 |
| gene1805 | gene1805 | SACOL1844  | gi 57650036 ref NC_002951.2 :1898268-1899747 | q1 | q2 | OK     | 44.4088  | 71.0612 | 0.678219    | -0.62924  | 0.529193 | 0.963286 |
| gene1806 | gene1806 | SACOL1845  | gi 57650036 ref NC_002951.2 :1899905-1900388 | q1 | q2 | OK     | 12.3397  | 29.8979 | 1.27674     | -0.64446  | 0.519277 | 0.963286 |
| gene1807 | gene1807 | SACOL1846  | gi 57650036 ref NC_002951.2 :1900663-1901314 | q1 | q2 | OK     | 267.878  | 349.853 | 0.385171    | -0.37653  | 0.706524 | 0.978191 |
| gene1808 | gene1808 | SACOL1847  | gi 57650036 ref NC_002951.2 :1901394-1902390 | q1 | q2 | OK     | 805.855  | 253.278 | -1.6698     | 1.40451   | 0.160169 | 0.842707 |
| gene1809 | gene1809 | SACOL1848  | gi 57650036 ref NC_002951.2 :1902465-1903092 | q1 | q2 | OK     | 28.5933  | 49.9274 | 0.804156    | -0.47543  | 0.634484 | 0.978191 |
| gene181  | gene181  | SACOL187   | gi 57650036 ref NC_002951.2 :218527-220303   | q1 | q2 | OK     | 35.6374  | 34.477  | -0.0477578  | 0.04177   | 0.966682 | 0.991337 |
| gene1810 | gene1810 | SACOL1849  | gi 57650036 ref NC_002951.2 :1903132-1903477 | q1 | q2 | OK     | 37.2865  | 18.8612 | -0.983231   | 0.476842  | 0.633474 | 0.978191 |
| gene1811 | gene1811 | SACOL1850  | gi 57650036 ref NC_002951.2 :1903574-1904126 | q1 | q2 | OK     | 38.3704  | 25.1705 | -0.608263   | 0.336822  | 0.736251 | 0.978191 |
| gene1812 | gene1812 | SACOL1851  | gi 57650036 ref NC_002951.2 :1904343-1904985 | q1 | q2 | OK     | 11.742   | 31.0481 | 1.40282     | -0.74939  | 0.453622 | 0.956269 |
| gene1813 | gene1813 | SACOL1853  | gi 57650036 ref NC_002951.2 :1905285-1905462 | q1 | q2 | OK     | 0        | 14.7684 | 1.79769e+30 | 1.79769e+ | 0.206623 | 0.842707 |
| gene1814 | gene1814 | SACOL1854  | gi 57650036 ref NC_002951.2 :1905472-1905856 | q1 | q2 | OK     | 31.5579  | 139.55  | 2.14471     | -1.21481  | 0.224437 | 0.854232 |
| gene1815 | gene1815 | SACOL1855  | gi 57650036 ref NC_002951.2 :1905957-1906735 | q1 | q2 | OK     | 20.8055  | 34.6023 | 0.733899    | -0.43083  | 0.666593 | 0.978191 |
| gene1816 | gene1816 | SACOL1857  | gi 57650036 ref NC_002951.2 :1907605-1907983 | q1 | q2 | OK     | 9.54123  | 22.1695 | 1.21633     | -0.56803  | 0.570017 | 0.976548 |
| gene1817 | gene1817 | SACOL1858  | gi 57650036 ref NC_002951.2 :1908503-1909064 | q1 | q2 | OK     | 5.6972   | 23.4548 | 2.04156     | -1.00289  | 0.315912 | 0.927653 |
| gene1818 | gene1818 | SACOL1859  | gi 57650036 ref NC_002951.2 :1909268-1912319 | q1 | q2 | OK     | 2.34199  | 19.1149 | 3.02889     | -1.90491  | 0.056792 | 0.696046 |
| gene1819 | gene1819 | SACOL1860  | gi 57650036 ref NC_002951.2 :1912385-1912616 | q1 | q2 | OK     | 0        | 10.2076 | 1.79769e+30 | 1.79769e+ | 0.200139 | 0.842707 |
| gene182  | gene182  | ggt        | gi 57650036 ref NC_002951.2 :220340-222347   | q1 | q2 | OK     | 24.5536  | 50.7842 | 1.04844     | -0.9154   | 0.35998  | 0.93284  |
| gene1820 | gene1820 | hsdS       | gi 57650036 ref NC_002951.2 :1913465-1916214 | q1 | q2 | OK     | 21.6579  | 35.306  | 0.705015    | -0.41402  | 0.67886  | 0.978191 |
| gene1821 | gene1821 | hsdM2      | gi 57650036 ref NC_002951.2 :1913465-1916214 | q1 | q2 | OK     | 19.5438  | 35.6664 | 0.867851    | -0.5778   | 0.5634   | 0.976548 |
| gene1822 | gene1822 | SACOL1863  | gi 57650036 ref NC_002951.2 :1916377-1916512 | q1 | q2 | NOTEST | 0        | 0       | 0           | 0         | 1        | 1        |
| gene1823 | gene1823 | SACOL1864  | gi 57650036 ref NC_002951.2 :1916576-1917296 | q1 | q2 | OK     | 0.430305 | 58.7837 | 7.09391     | -3.47549  | 0.00051  | 0.281629 |
| gene1824 | gene1824 | SACOL1865  | gi 57650036 ref NC_002951.2 :1917446-1918163 | q1 | q2 | OK     | 1.73169  | 18.3866 | 3.4084      | -1.62039  | 0.105149 | 0.816834 |
| gene1825 | gene1825 | SACOL1866  | gi 57650036 ref NC_002951.2 :1918320-1919040 | q1 | q2 | OK     | 0        | 34.012  | 1.79769e+30 | 1.79769e+ | 0.108588 | 0.825336 |
| gene1826 | gene1826 | splC       | gi 57650036 ref NC_002951.2 :1919160-1919880 | q1 | q2 | OK     | 2.58183  | 32.4392 | 3.65127     | -1.8324   | 0.066892 | 0.73141  |
| gene1827 | gene1827 | splB       | gi 57650036 ref NC_002951.2 :1919937-1920660 | q1 | q2 | OK     | 2.56632  | 59.0439 | 4.52401     | -2.37801  | 0.017407 | 0.500083 |

|          |          |            |                                              |    |    |        |          |         |             |           |          |          |
|----------|----------|------------|----------------------------------------------|----|----|--------|----------|---------|-------------|-----------|----------|----------|
| gene1828 | gene1828 | splA       | gi 57650036 ref NC_002951.2 :1920784-1921501 | q1 | q2 | OK     | 0.432921 | 53.7757 | 6.95671     | -3.38241  | 0.000719 | 0.281629 |
| gene1829 | gene1829 | SACOL1870  | gi 57650036 ref NC_002951.2 :1922464-1923031 | q1 | q2 | OK     | 0        | 20.0652 | 1.79769e+30 | 1.79769e+ | 0.141005 | 0.842707 |
| gene183  | gene183  | SACOL0189  | gi 57650036 ref NC_002951.2 :222644-223418   | q1 | q2 | NOTEST | 0        | 0       | 0           | 0         | 1        | 1        |
| gene1830 | gene1830 | epiG       | gi 57650036 ref NC_002951.2 :1923504-1925650 | q1 | q2 | OK     | 106.038  | 197.845 | 0.899795    | -0.4681   | 0.639711 | 0.978191 |
| gene1831 | gene1831 | epiE       | gi 57650036 ref NC_002951.2 :1923504-1925650 | q1 | q2 | OK     | 76.9671  | 129.285 | 0.748241    | -0.34022  | 0.733695 | 0.978191 |
| gene1832 | gene1832 | epiF       | gi 57650036 ref NC_002951.2 :1923504-1925650 | q1 | q2 | OK     | 89.646   | 320.647 | 1.83867     | -1.04518  | 0.295941 | 0.924214 |
| gene1833 | gene1833 | epiP       | gi 57650036 ref NC_002951.2 :1925672-1927046 | q1 | q2 | OK     | 40.2922  | 53.4708 | 0.408251    | -0.35173  | 0.725041 | 0.978191 |
| gene1834 | gene1834 | epiD       | gi 57650036 ref NC_002951.2 :1927055-1927574 | q1 | q2 | OK     | 1.44565  | 20.1019 | 3.79754     | -1.72506  | 0.084516 | 0.767592 |
| gene1835 | gene1835 | epiC       | gi 57650036 ref NC_002951.2 :1927589-1931820 | q1 | q2 | OK     | 3.34606  | 22.5734 | 2.75409     | -1.17968  | 0.238128 | 0.878184 |
| gene1836 | gene1836 | epiB       | gi 57650036 ref NC_002951.2 :1927589-1931820 | q1 | q2 | OK     | 1.38785  | 14.1289 | 3.34774     | -1.59662  | 0.11035  | 0.829058 |
| gene1837 | gene1837 | epiA       | gi 57650036 ref NC_002951.2 :1931884-1932028 | q1 | q2 | OK     | 209.722  | 50.8711 | -2.04356    | 0.835825  | 0.403253 | 0.940909 |
| gene1838 | gene1838 | SACOL1879  | gi 57650036 ref NC_002951.2 :1932919-1934239 | q1 | q2 | OK     | 0.974117 | 9.28849 | 3.25328     | -1.56798  | 0.116885 | 0.838847 |
| gene1839 | gene1839 | lukD       | gi 57650036 ref NC_002951.2 :1934670-1935654 | q1 | q2 | OK     | 2.52819  | 61.8289 | 4.6121      | -2.60721  | 0.009128 | 0.498321 |
| gene184  | gene184  | acpD       | gi 57650036 ref NC_002951.2 :223607-224234   | q1 | q2 | OK     | 31.2408  | 63.0037 | 1.012       | -0.61799  | 0.536584 | 0.963603 |
| gene1840 | gene1840 | lukE       | gi 57650036 ref NC_002951.2 :1935655-1936591 | q1 | q2 | OK     | 1.79902  | 33.9359 | 4.23753     | -2.18526  | 0.02887  | 0.604847 |
| gene1841 | gene1841 | SACOL1882  | gi 57650036 ref NC_002951.2 :1937390-1937930 | q1 | q2 | OK     | 10.1245  | 39.6149 | 1.96819     | -1.02354  | 0.306052 | 0.927653 |
| gene1842 | gene1842 | SACOL1883  | gi 57650036 ref NC_002951.2 :1937942-1938731 | q1 | q2 | OK     | 43.0683  | 60.8057 | 0.497581    | -0.34027  | 0.733652 | 0.978191 |
| gene1843 | gene1843 | SACOL_tRNA | gi 57650036 ref NC_002951.2 :1939973-1940062 | q1 | q2 | NOTEST | 0        | 0       | 0           | 0         | 1        | 1        |
| gene1844 | gene1844 | SACOL_tRNA | gi 57650036 ref NC_002951.2 :1940116-1940188 | q1 | q2 | NOTEST | 0        | 0       | 0           | 0         | 1        | 1        |
| gene1845 | gene1845 | SACOL_tRNA | gi 57650036 ref NC_002951.2 :1940189-1940264 | q1 | q2 | NOTEST | 0        | 0       | 0           | 0         | 1        | 1        |
| gene1846 | gene1846 | SACOL_tRNA | gi 57650036 ref NC_002951.2 :1940278-1940352 | q1 | q2 | NOTEST | 0        | 0       | 0           | 0         | 1        | 1        |
| gene1847 | gene1847 | SACOL_tRNA | gi 57650036 ref NC_002951.2 :1940367-1940443 | q1 | q2 | NOTEST | 0        | 0       | 0           | 0         | 1        | 1        |
| gene1849 | gene1849 | SACOL_tRNA | gi 57650036 ref NC_002951.2 :1940545-1940621 | q1 | q2 | NOTEST | 0        | 0       | 0           | 0         | 1        | 1        |
| gene185  | gene185  | SACOL0191  | gi 57650036 ref NC_002951.2 :224442-225021   | q1 | q2 | OK     | 41.4685  | 54.9079 | 0.404996    | -0.24426  | 0.807034 | 0.984151 |
| gene1850 | gene1850 | SACOL_tRNA | gi 57650036 ref NC_002951.2 :1940642-1940716 | q1 | q2 | NOTEST | 0        | 0       | 0           | 0         | 1        | 1        |
| gene1851 | gene1851 | SACOL1885  | gi 57650036 ref NC_002951.2 :1941187-1941742 | q1 | q2 | OK     | 23.8453  | 50.7865 | 1.09074     | -0.61602  | 0.537884 | 0.964015 |
| gene1852 | gene1852 | SACOL1886  | gi 57650036 ref NC_002951.2 :1941835-1942063 | q1 | q2 | OK     | 103.743  | 120.393 | 0.214734    | -0.10707  | 0.914737 | 0.984151 |
| gene1853 | gene1853 | hemG       | gi 57650036 ref NC_002951.2 :1942064-1943465 | q1 | q2 | OK     | 65.6742  | 58.5289 | -0.166177   | 0.159176  | 0.87353  | 0.984151 |
| gene1854 | gene1854 | hemH       | gi 57650036 ref NC_002951.2 :1943488-1944412 | q1 | q2 | OK     | 66.7893  | 50.5878 | -0.400827   | 0.310358  | 0.756288 | 0.978191 |
| gene1855 | gene1855 | hemE       | gi 57650036 ref NC_002951.2 :1944469-1945607 | q1 | q2 | OK     | 47.4734  | 50.5149 | 0.0895906   | -0.06621  | 0.947214 | 0.987716 |
| gene1856 | gene1856 | SACOL1890  | gi 57650036 ref NC_002951.2 :1944469-1945607 | q1 | q2 | NOTEST | 0        | 0       | 0           | 0         | 1        | 1        |
| gene1857 | gene1857 | SACOL1891  | gi 57650036 ref NC_002951.2 :1945769-1946273 | q1 | q2 | OK     | 291.597  | 56.2169 | -2.3749     | 1.72311   | 0.084868 | 0.767592 |
| gene1858 | gene1858 | SACOL1892  | gi 57650036 ref NC_002951.2 :1946396-1948353 | q1 | q2 | OK     | 203.91   | 83.6944 | -1.28473    | 0.952808  | 0.340687 | 0.93284  |

|          |          |            |                                              |    |    |          |         |         |            |          |          |          |
|----------|----------|------------|----------------------------------------------|----|----|----------|---------|---------|------------|----------|----------|----------|
| gene1859 | gene1859 | SACOL1893  | gi 57650036 ref NC_002951.2 :1946396-1948353 | q1 | q2 | OK       | 177.934 | 101.604 | -0.808386  | 0.435753 | 0.663016 | 0.978191 |
| gene186  | gene186  | SACOL0192  | gi 57650036 ref NC_002951.2 :225403-226501   | q1 | q2 | OK       | 3.90858 | 28.9685 | 2.88977    | -1.58291 | 0.113441 | 0.836663 |
| gene1860 | gene1860 | SACOL1894  | gi 57650036 ref NC_002951.2 :1948486-1948909 | q1 | q2 | OK       | 88.4884 | 66.3713 | -0.414929  | 0.247121 | 0.804815 | 0.984151 |
| gene1861 | gene1861 | SACOL1895  | gi 57650036 ref NC_002951.2 :1949050-1949416 | q1 | q2 | OK       | 446.719 | 623.878 | 0.481897   | -0.46139 | 0.644516 | 0.978191 |
| gene1862 | gene1862 | SACOL1896  | gi 57650036 ref NC_002951.2 :1950148-1950706 | q1 | q2 | OK       | 21.0769 | 25.0496 | 0.249123   | -0.13236 | 0.894703 | 0.984151 |
| gene1863 | gene1863 | SACOL1897  | gi 57650036 ref NC_002951.2 :1950910-1951873 | q1 | q2 | OK       | 134.911 | 56.7238 | -1.24998   | 1.09622  | 0.272981 | 0.906044 |
| gene1864 | gene1864 | cbf1       | gi 57650036 ref NC_002951.2 :1951993-1957054 | q1 | q2 | OK       | 326.769 | 89.0387 | -1.87577   | 0.697991 | 0.485183 | 0.962734 |
| gene1865 | gene1865 | SACOL1899  | gi 57650036 ref NC_002951.2 :1951993-1957054 | q1 | q2 | OK       | 213.101 | 71.1862 | -1.58187   | 0.959043 | 0.337537 | 0.93058  |
| gene1866 | gene1866 | SACOL1900  | gi 57650036 ref NC_002951.2 :1951993-1957054 | q1 | q2 | OK       | 159.973 | 72.4871 | -1.14203   | 0.383787 | 0.701136 | 0.978191 |
| gene1867 | gene1867 | SACOL1902  | gi 57650036 ref NC_002951.2 :1957825-1958170 | q1 | q2 | OK       | 1269.44 | 196.417 | -2.6922    | 2.14547  | 0.031915 | 0.60736  |
| gene1868 | gene1868 | SACOL1903  | gi 57650036 ref NC_002951.2 :1958238-1959363 | q1 | q2 | OK       | 39.5739 | 31.5017 | -0.329119  | 0.230127 | 0.817993 | 0.984151 |
| gene1869 | gene1869 | SACOL1904  | gi 57650036 ref NC_002951.2 :1959541-1960006 | q1 | q2 | OK       | 139.582 | 53.1314 | -1.39348   | 0.887462 | 0.37483  | 0.940093 |
| gene187  | gene187  | SACOL0193  | gi 57650036 ref NC_002951.2 :226513-227785   | q1 | q2 | OK       | 3.05615 | 33.5543 | 3.45671    | -1.95175 | 0.050968 | 0.6872   |
| gene1870 | gene1870 | SACOL1905  | gi 57650036 ref NC_002951.2 :1960361-1960985 | q1 | q2 | OK       | 25.6067 | 27.7664 | 0.116822   | -0.06504 | 0.948146 | 0.987716 |
| gene1871 | gene1871 | SACOL1906  | gi 57650036 ref NC_002951.2 :1961006-1962119 | q1 | q2 | OK       | 23.2962 | 29.8641 | 0.35832    | -0.2298  | 0.81825  | 0.984151 |
| gene1872 | gene1872 | SACOL1907  | gi 57650036 ref NC_002951.2 :1962281-1963103 | q1 | q2 | OK       | 124.221 | 36.0213 | -1.78599   | 1.33672  | 0.181314 | 0.842707 |
| gene1873 | gene1873 | fumC       | gi 57650036 ref NC_002951.2 :1963565-1964951 | q1 | q2 | OK       | 287.587 | 75.4119 | -1.93113   | 1.75859  | 0.078648 | 0.758524 |
| gene1874 | gene1874 | SACOL1909  | gi 57650036 ref NC_002951.2 :1965146-1965542 | q1 | q2 | OK       | 65.0572 | 27.2327 | -1.25637   | 0.66753  | 0.504433 | 0.963286 |
| gene1875 | gene1875 | SACOL1910  | gi 57650036 ref NC_002951.2 :1965660-1966023 | q1 | q2 | OK       | 5.99371 | 21.6684 | 1.85407    | -0.84107 | 0.400308 | 0.940909 |
| gene1876 | gene1876 | SACOL1911  | gi 57650036 ref NC_002951.2 :1966318-1966471 | q1 | q2 | OK       | 2777.48 | 2875.24 | 0.049905   | -0.02935 | 0.976586 | 0.996166 |
| gene1877 | gene1877 | SACOL1912  | gi 57650036 ref NC_002951.2 :1966495-1967095 | q1 | q2 | OK       | 396.668 | 929.75  | 1.22891    | -1.0955  | 0.273297 | 0.906044 |
| gene1878 | gene1878 | SACOL1913  | gi 57650036 ref NC_002951.2 :1967253-1967724 | q1 | q2 | OK       | 52.5951 | 49.0948 | -0.0993579 | 0.057036 | 0.954516 | 0.989031 |
| gene1879 | gene1879 | SACOL1914  | gi 57650036 ref NC_002951.2 :1967728-1968856 | q1 | q2 | OK       | 67.076  | 56.8807 | -0.237858  | 0.210634 | 0.833173 | 0.984151 |
| gene188  | gene188  | SACOL0194  | gi 57650036 ref NC_002951.2 :227787-229056   | q1 | q2 | OK       | 11.6467 | 29.3681 | 1.33433    | -0.82562 | 0.409021 | 0.940909 |
| gene1880 | gene1880 | SACOL1915  | gi 57650036 ref NC_002951.2 :1969006-1971179 | q1 | q2 | OK       | 14.3698 | 32.6783 | 1.18529    | -0.51696 | 0.605188 | 0.978191 |
| gene1881 | gene1881 | SACOL1916  | gi 57650036 ref NC_002951.2 :1969006-1971179 | q1 | q2 | OK       | 7.09477 | 35.3702 | 2.31771    | -1.24034 | 0.214848 | 0.850184 |
| gene1882 | gene1882 | SACOL1917  | gi 57650036 ref NC_002951.2 :1971436-1972498 | q1 | q2 | OK       | 65.2226 | 81.8136 | 0.326968   | -0.29731 | 0.766231 | 0.978191 |
| gene1883 | gene1883 | SACOL1918  | gi 57650036 ref NC_002951.2 :1972990-1974310 | q1 | q2 | OK       | 1.55859 | 10.5889 | 2.76424    | -1.37555 | 0.16896  | 0.842707 |
| gene1884 | gene1884 | SACOL_tRNA | gi 57650036 ref NC_002951.2 :1974496-1974580 | q1 | q2 | NOTEST 0 |         | 0       | 0          | 0        | 1        | 1        |
| gene1885 | gene1885 | SACOL_tRNA | gi 57650036 ref NC_002951.2 :1974796-1974871 | q1 | q2 | NOTEST 0 |         | 0       | 0          | 0        | 1        | 1        |
| gene1886 | gene1886 | SACOL_tRNA | gi 57650036 ref NC_002951.2 :1974878-1974952 | q1 | q2 | NOTEST 0 |         | 0       | 0          | 0        | 1        | 1        |
| gene1887 | gene1887 | SACOL_tRNA | gi 57650036 ref NC_002951.2 :1974957-1975029 | q1 | q2 | NOTEST 0 |         | 0       | 0          | 0        | 1        | 1        |
| gene1888 | gene1888 | SACOL_tRNA | gi 57650036 ref NC_002951.2 :1975040-1975113 | q1 | q2 | NOTEST 0 |         | 0       | 0          | 0        | 1        | 1        |

|          |          |                                                          |    |    |            |         |            |          |          |          |
|----------|----------|----------------------------------------------------------|----|----|------------|---------|------------|----------|----------|----------|
| gene1889 | gene1889 | SACOL_tRNA·gij 57650036 ref NC_002951.2 :1975115-1975189 | q1 | q2 | NOTEST 0   | 0       | 0          | 0        | 1        | 1        |
| gene189  | gene189  | SACOL0195_gij 57650036 ref NC_002951.2 :229057-229897    | q1 | q2 | OK 10.396  | 28.2851 | 1.44401    | -0.8016  | 0.422783 | 0.949436 |
| gene1890 | gene1890 | SACOL_tRNA·gij 57650036 ref NC_002951.2 :1975204-1975285 | q1 | q2 | NOTEST 0   | 0       | 0          | 0        | 1        | 1        |
| gene1891 | gene1891 | SACOL_tRNA·gij 57650036 ref NC_002951.2 :1975290-1975366 | q1 | q2 | NOTEST 0   | 0       | 0          | 0        | 1        | 1        |
| gene1892 | gene1892 | SACOL_tRNA·gij 57650036 ref NC_002951.2 :1975373-1975446 | q1 | q2 | NOTEST 0   | 0       | 0          | 0        | 1        | 1        |
| gene1893 | gene1893 | SACOL_tRNA·gij 57650036 ref NC_002951.2 :1975464-1975540 | q1 | q2 | NOTEST 0   | 0       | 0          | 0        | 1        | 1        |
| gene1894 | gene1894 | SACOL_tRNA·gij 57650036 ref NC_002951.2 :1975549-1975623 | q1 | q2 | NOTEST 0   | 0       | 0          | 0        | 1        | 1        |
| gene1896 | gene1896 | SACOL_tRNA·gij 57650036 ref NC_002951.2 :1975768-1975844 | q1 | q2 | NOTEST 0   | 0       | 0          | 0        | 1        | 1        |
| gene1898 | gene1898 | SACOL_tRNA·gij 57650036 ref NC_002951.2 :1975953-1976027 | q1 | q2 | NOTEST 0   | 0       | 0          | 0        | 1        | 1        |
| gene19   | gene19   | SACOL_tRNA·gij 57650036 ref NC_002951.2 :24259-24332     | q1 | q2 | NOTEST 0   | 0       | 0          | 0        | 1        | 1        |
| gene190  | gene190  | SACOL0196_gij 57650036 ref NC_002951.2 :229970-231047    | q1 | q2 | OK 4.00476 | 60.5968 | 3.91945    | -2.32742 | 0.019943 | 0.517412 |
| gene1905 | gene1905 | SACOL_tRNA·gij 57650036 ref NC_002951.2 :1976595-1976677 | q1 | q2 | NOTEST 0   | 0       | 0          | 0        | 1        | 1        |
| gene1906 | gene1906 | SACOL_tRNA·gij 57650036 ref NC_002951.2 :1976680-1976756 | q1 | q2 | NOTEST 0   | 0       | 0          | 0        | 1        | 1        |
| gene1907 | gene1907 | SACOL_tRNA·gij 57650036 ref NC_002951.2 :1976761-1976837 | q1 | q2 | NOTEST 0   | 0       | 0          | 0        | 1        | 1        |
| gene1908 | gene1908 | SACOL_tRNA·gij 57650036 ref NC_002951.2 :1976853-1976929 | q1 | q2 | NOTEST 0   | 0       | 0          | 0        | 1        | 1        |
| gene1909 | gene1909 | rrfD_gij 57650036 ref NC_002951.2 :1976940-1977055       | q1 | q2 | OK 439031  | 280805  | -0.644753  | 0.632483 | 0.527072 | 0.963286 |
| gene191  | gene191  | SACOL0197_gij 57650036 ref NC_002951.2 :231071-232112    | q1 | q2 | OK 5.22643 | 57.3537 | 3.45599    | -2.0677  | 0.038668 | 0.641477 |
| gene1910 | gene1910 | rrlD_gij 57650036 ref NC_002951.2 :1977127-1980050       | q1 | q2 | OK 35530.4 | 19386.9 | -0.873972  | 1.2246   | 0.220727 | 0.852509 |
| gene1913 | gene1913 | rrsD_gij 57650036 ref NC_002951.2 :1980523-1982078       | q1 | q2 | OK 14784.5 | 6346.01 | -1.22016   | 0.964906 | 0.334592 | 0.927826 |
| gene1914 | gene1914 | SACOL1919_gij 57650036 ref NC_002951.2 :1982817-1983264  | q1 | q2 | OK 1797.7  | 364.874 | -2.30068   | 2.05587  | 0.039795 | 0.641477 |
| gene1915 | gene1915 | SACOL1920_gij 57650036 ref NC_002951.2 :1983360-1984311  | q1 | q2 | OK 85.1597 | 95.1454 | 0.159964   | -0.14934 | 0.881286 | 0.984151 |
| gene1916 | gene1916 | bcp_gij 57650036 ref NC_002951.2 :1984316-1984772        | q1 | q2 | OK 217.389 | 175.077 | -0.312283  | 0.260331 | 0.794609 | 0.983954 |
| gene1917 | gene1917 | hemL2_gij 57650036 ref NC_002951.2 :1984852-1986142      | q1 | q2 | OK 115.776 | 108.471 | -0.0940205 | 0.092978 | 0.925921 | 0.9868   |
| gene1918 | gene1918 | SACOL1923_gij 57650036 ref NC_002951.2 :1986434-1987529  | q1 | q2 | OK 67.1649 | 48.8642 | -0.45893   | 0.386539 | 0.699098 | 0.978191 |
| gene1919 | gene1919 | SACOL1924_gij 57650036 ref NC_002951.2 :1987719-1989456  | q1 | q2 | OK 74.8053 | 45.6049 | -0.713952  | 0.692125 | 0.488859 | 0.963286 |
| gene192  | gene192  | SACOL0198_gij 57650036 ref NC_002951.2 :232166-233135    | q1 | q2 | OK 14.9013 | 24.3166 | 0.706508   | -0.4106  | 0.681368 | 0.978191 |
| gene1920 | gene1920 | SACOL1925_gij 57650036 ref NC_002951.2 :1989746-1990289  | q1 | q2 | OK 150.444 | 38.9919 | -1.94798   | 1.30306  | 0.192553 | 0.842707 |
| gene1921 | gene1921 | mutY_gij 57650036 ref NC_002951.2 :1990590-1991628       | q1 | q2 | OK 16.2616 | 30.8771 | 0.925067   | -0.56384 | 0.572865 | 0.976548 |
| gene1922 | gene1922 | SACOL1927_gij 57650036 ref NC_002951.2 :1991779-1992757  | q1 | q2 | OK 195.369 | 181.44  | -0.106712  | 0.104187 | 0.917021 | 0.984151 |
| gene1923 | gene1923 | SACOL1928_gij 57650036 ref NC_002951.2 :1993017-1993854  | q1 | q2 | OK 70.6905 | 53.4392 | -0.403619  | 0.302882 | 0.76198  | 0.978191 |
| gene1924 | gene1924 | SACOL1929_gij 57650036 ref NC_002951.2 :1993862-1995380  | q1 | q2 | OK 49.6716 | 42.2459 | -0.23361   | 0.21088  | 0.832981 | 0.984151 |
| gene1925 | gene1925 | SACOL1930_gij 57650036 ref NC_002951.2 :1995394-1996505  | q1 | q2 | OK 53.3755 | 91.674  | 0.780336   | -0.25827 | 0.796201 | 0.984096 |
| gene1926 | gene1926 | recX_gij 57650036 ref NC_002951.2 :1995394-1996505       | q1 | q2 | OK 43.4095 | 66.2398 | 0.609686   | -0.41802 | 0.675936 | 0.978191 |

|          |          |           |                                              |    |    |        |         |         |             |           |          |          |
|----------|----------|-----------|----------------------------------------------|----|----|--------|---------|---------|-------------|-----------|----------|----------|
| gene1927 | gene1927 | SACOL1932 | gi 57650036 ref NC_002951.2 :1996765-1997575 | q1 | q2 | OK     | 62.2889 | 46.309  | -0.427684   | 0.29938   | 0.76465  | 0.978191 |
| gene1928 | gene1928 | SACOL1933 | gi 57650036 ref NC_002951.2 :1997915-1998431 | q1 | q2 | OK     | 358.537 | 407.557 | 0.18488     | -0.18246  | 0.85522  | 0.984151 |
| gene1929 | gene1929 | SACOL1934 | gi 57650036 ref NC_002951.2 :1998561-1998723 | q1 | q2 | OK     | 0       | 24.3501 | 1.79769e+30 | 1.79769e+ | 0.206623 | 0.842707 |
| gene193  | gene193  | SACOL0199 | gi 57650036 ref NC_002951.2 :233495-234068   | q1 | q2 | OK     | 6.72435 | 35.4539 | 2.39848     | -1.22402  | 0.220946 | 0.852509 |
| gene1930 | gene1930 | SACOL1935 | gi 57650036 ref NC_002951.2 :1998946-2000098 | q1 | q2 | OK     | 24.6183 | 40.1058 | 0.704078    | -0.48208  | 0.62975  | 0.978191 |
| gene1931 | gene1931 | SACOL1936 | gi 57650036 ref NC_002951.2 :2000357-2000888 | q1 | q2 | OK     | 248.697 | 104.022 | -1.2575     | 1.03335   | 0.301439 | 0.926618 |
| gene1932 | gene1932 | pepS      | gi 57650036 ref NC_002951.2 :2000977-2002234 | q1 | q2 | OK     | 115.546 | 57.9174 | -0.996394   | 0.946507  | 0.34389  | 0.93284  |
| gene1933 | gene1933 | SACOL1938 | gi 57650036 ref NC_002951.2 :2002236-2002443 | q1 | q2 | OK     | 47.3709 | 59.3372 | 0.324937    | -0.14534  | 0.884445 | 0.984151 |
| gene1934 | gene1934 | SACOL1939 | gi 57650036 ref NC_002951.2 :2002583-2003048 | q1 | q2 | OK     | 649.324 | 553.39  | -0.230642   | 0.223584  | 0.823081 | 0.984151 |
| gene1935 | gene1935 | SACOL1940 | gi 57650036 ref NC_002951.2 :2003054-2003330 | q1 | q2 | OK     | 1911.6  | 182.137 | -3.39169    | 2.44879   | 0.014334 | 0.500083 |
| gene1936 | gene1936 | SACOL1941 | gi 57650036 ref NC_002951.2 :2003607-2004825 | q1 | q2 | OK     | 192.038 | 121.729 | -0.657721   | 0.635294  | 0.525237 | 0.963286 |
| gene1937 | gene1937 | vraR      | gi 57650036 ref NC_002951.2 :2004940-2007301 | q1 | q2 | OK     | 71.4812 | 63.7619 | -0.164868   | 0.092824  | 0.926044 | 0.9868   |
| gene1938 | gene1938 | vraS      | gi 57650036 ref NC_002951.2 :2004940-2007301 | q1 | q2 | OK     | 52.0731 | 40.1059 | -0.376725   | 0.244481  | 0.806859 | 0.984151 |
| gene1939 | gene1939 | SACOL1944 | gi 57650036 ref NC_002951.2 :2004940-2007301 | q1 | q2 | OK     | 35.7196 | 44.7514 | 0.325215    | -0.15132  | 0.879726 | 0.984151 |
| gene194  | gene194  | uhpT      | gi 57650036 ref NC_002951.2 :234222-235602   | q1 | q2 | OK     | 15.3313 | 48.262  | 1.6544      | -1.16616  | 0.243549 | 0.885084 |
| gene1940 | gene1940 | SACOL1945 | gi 57650036 ref NC_002951.2 :2007315-2007702 | q1 | q2 | OK     | 16.796  | 20.1602 | 0.263392    | -0.12624  | 0.899546 | 0.984151 |
| gene1941 | gene1941 | SACOL1946 | gi 57650036 ref NC_002951.2 :2007918-2008677 | q1 | q2 | OK     | 208.257 | 95.8646 | -1.1193     | 1.03877   | 0.298911 | 0.924214 |
| gene1942 | gene1942 | SACOL1947 | gi 57650036 ref NC_002951.2 :2009204-2010191 | q1 | q2 | OK     | 15.9489 | 22.3277 | 0.485375    | -0.28271  | 0.777403 | 0.981796 |
| gene1943 | gene1943 | SACOL1948 | gi 57650036 ref NC_002951.2 :2010621-2011035 | q1 | q2 | OK     | 6.69101 | 11.416  | 0.770755    | -0.34953  | 0.726692 | 0.978191 |
| gene1944 | gene1944 | SACOL1949 | gi 57650036 ref NC_002951.2 :2011063-2011174 | q1 | q2 | OK     | 0       | 326.307 | 1.79769e+30 | 1.79769e+ | 0.207933 | 0.842707 |
| gene1945 | gene1945 | SACOL1950 | gi 57650036 ref NC_002951.2 :2011259-2011991 | q1 | q2 | OK     | 165.118 | 118.461 | -0.47909    | 0.455894  | 0.648466 | 0.978191 |
| gene1946 | gene1946 | SACOL1951 | gi 57650036 ref NC_002951.2 :2011992-2013306 | q1 | q2 | OK     | 119.888 | 42.3    | -1.50296    | 1.34293   | 0.179293 | 0.842707 |
| gene1947 | gene1947 | SACOL1952 | gi 57650036 ref NC_002951.2 :2013597-2014098 | q1 | q2 | OK     | 744.155 | 376.652 | -0.982372   | 0.943804  | 0.34527  | 0.93284  |
| gene1948 | gene1948 | SACOL1953 | gi 57650036 ref NC_002951.2 :2014179-2014272 | q1 | q2 | NOTEST | 0       | 0       | 0           | 0         | 1        | 1        |
| gene1949 | gene1949 | SACOL1954 | gi 57650036 ref NC_002951.2 :2014486-2015041 | q1 | q2 | OK     | 205.585 | 37.7352 | -2.44575    | 1.70133   | 0.088881 | 0.775024 |
| gene195  | gene195  | SACOL0201 | gi 57650036 ref NC_002951.2 :235960-239233   | q1 | q2 | OK     | 15.5595 | 29.3276 | 0.914466    | -0.34842  | 0.727523 | 0.978191 |
| gene1950 | gene1950 | dinP      | gi 57650036 ref NC_002951.2 :2015108-2016179 | q1 | q2 | OK     | 47.6412 | 70.0441 | 0.556052    | -0.46075  | 0.644975 | 0.978191 |
| gene1951 | gene1951 | SACOL1956 | gi 57650036 ref NC_002951.2 :2016425-2016956 | q1 | q2 | OK     | 191.733 | 99.1699 | -0.951125   | 0.751775  | 0.452187 | 0.956269 |
| gene1952 | gene1952 | SACOL1957 | gi 57650036 ref NC_002951.2 :2017125-2018487 | q1 | q2 | OK     | 33.7744 | 35.6516 | 0.0780372   | -0.05943  | 0.952611 | 0.988316 |
| gene1953 | gene1953 | SACOL1958 | gi 57650036 ref NC_002951.2 :2018567-2019515 | q1 | q2 | OK     | 127.974 | 75.2276 | -0.766512   | 0.716236  | 0.473846 | 0.956269 |
| gene1954 | gene1954 | gatB      | gi 57650036 ref NC_002951.2 :2020283-2021711 | q1 | q2 | OK     | 297.422 | 64.3008 | -2.2096     | 1.98432   | 0.04722  | 0.66135  |
| gene1955 | gene1955 | gatA      | gi 57650036 ref NC_002951.2 :2021723-2023181 | q1 | q2 | OK     | 139.646 | 38.6835 | -1.85198    | 1.64896   | 0.099155 | 0.815096 |
| gene1956 | gene1956 | gatC      | gi 57650036 ref NC_002951.2 :2023182-2023485 | q1 | q2 | OK     | 226.887 | 69.2087 | -1.71295    | 0.978405  | 0.327874 | 0.927653 |



|          |          |           |                                              |    |    |    |          |         |             |           |          |          |
|----------|----------|-----------|----------------------------------------------|----|----|----|----------|---------|-------------|-----------|----------|----------|
| gene1957 | gene1957 | SACOL1963 | gi 57650036 ref NC_002951.2 :2023852-2025391 | q1 | q2 | OK | 260.794  | 84.8972 | -1.61912    | 1.4737    | 0.140562 | 0.842707 |
| gene1958 | gene1958 | camS      | gi 57650036 ref NC_002951.2 :2025479-2026679 | q1 | q2 | OK | 195.797  | 101.141 | -0.952985   | 0.922237  | 0.356405 | 0.93284  |
| gene1959 | gene1959 | ligA      | gi 57650036 ref NC_002951.2 :2026691-2028695 | q1 | q2 | OK | 91.4214  | 49.0698 | -0.897696   | 0.874818  | 0.381673 | 0.940893 |
| gene196  | gene196  | SACOL0202 | gi 57650036 ref NC_002951.2 :235960-239233   | q1 | q2 | OK | 8.49035  | 43.1225 | 2.34454     | -1.24049  | 0.214793 | 0.850184 |
| gene1960 | gene1960 | pcrA      | gi 57650036 ref NC_002951.2 :2028698-2031580 | q1 | q2 | OK | 64.2094  | 48.3978 | -0.407844   | 0.362666  | 0.716854 | 0.978191 |
| gene1961 | gene1961 | SACOL1967 | gi 57650036 ref NC_002951.2 :2028698-2031580 | q1 | q2 | OK | 36.8595  | 42.6425 | 0.210255    | -0.0787   | 0.937275 | 0.987716 |
| gene1962 | gene1962 | SACOL1968 | gi 57650036 ref NC_002951.2 :2031751-2032054 | q1 | q2 | OK | 467.954  | 78.8453 | -2.56927    | 1.61874   | 0.105504 | 0.816834 |
| gene1963 | gene1963 | purB      | gi 57650036 ref NC_002951.2 :2032162-2033458 | q1 | q2 | OK | 103.575  | 70.9756 | -0.545286   | 0.534482  | 0.593008 | 0.978191 |
| gene1964 | gene1964 | sspB2     | gi 57650036 ref NC_002951.2 :2034318-2035485 | q1 | q2 | OK | 0.905678 | 24.3622 | 4.7495      | -2.3857   | 0.017047 | 0.500083 |
| gene1965 | gene1965 | SACOL1971 | gi 57650036 ref NC_002951.2 :2035515-2035842 | q1 | q2 | OK | 3.87764  | 25.5916 | 2.72242     | -1.20279  | 0.229057 | 0.861295 |
| gene1966 | gene1966 | SACOL1972 | gi 57650036 ref NC_002951.2 :2036133-2036890 | q1 | q2 | OK | 184.052  | 32.3862 | -2.50666    | 0.274219  | 0.783916 | 0.982219 |
| gene1967 | gene1967 | SACOL1973 | gi 57650036 ref NC_002951.2 :2036133-2036890 | q1 | q2 | OK | 113.162  | 52.7781 | -1.10038    | 0.711396  | 0.476839 | 0.956269 |
| gene1968 | gene1968 | nadE      | gi 57650036 ref NC_002951.2 :2037160-2039444 | q1 | q2 | OK | 106.73   | 85.592  | -0.318424   | 0.177144  | 0.859395 | 0.984151 |
| gene1969 | gene1969 | SACOL1975 | gi 57650036 ref NC_002951.2 :2037160-2039444 | q1 | q2 | OK | 96.6567  | 86.4113 | -0.16165    | 0.125825  | 0.899871 | 0.984151 |
| gene197  | gene197  | SACOL0203 | gi 57650036 ref NC_002951.2 :235960-239233   | q1 | q2 | OK | 6.87751  | 43.5281 | 2.66199     | -0.97615  | 0.32899  | 0.927653 |
| gene1970 | gene1970 | SACOL1976 | gi 57650036 ref NC_002951.2 :2039627-2040704 | q1 | q2 | OK | 58.0691  | 30.5937 | -0.924534   | 0.678677  | 0.497343 | 0.963286 |
| gene1971 | gene1971 | pheA      | gi 57650036 ref NC_002951.2 :2040723-2041518 | q1 | q2 | OK | 62.4288  | 38.8173 | -0.685512   | 0.464497  | 0.642292 | 0.978191 |
| gene1972 | gene1972 | SACOL1978 | gi 57650036 ref NC_002951.2 :2041542-2041665 | q1 | q2 | OK | 0        | 90.0494 | 1.79769e+30 | 1.79769e+ | 0.207933 | 0.842707 |
| gene1973 | gene1973 | SACOL1979 | gi 57650036 ref NC_002951.2 :2041707-2043270 | q1 | q2 | OK | 137.789  | 77.2219 | -0.835377   | 0.810729  | 0.417521 | 0.948842 |
| gene1974 | gene1974 | SACOL1980 | gi 57650036 ref NC_002951.2 :2043474-2044572 | q1 | q2 | OK | 23.9401  | 55.398  | 1.21041     | -0.85698  | 0.391454 | 0.940909 |
| gene1975 | gene1975 | SACOL1981 | gi 57650036 ref NC_002951.2 :2044943-2045504 | q1 | q2 | OK | 100.018  | 132.352 | 0.40413     | -0.30939  | 0.757029 | 0.978191 |
| gene1976 | gene1976 | ppaC      | gi 57650036 ref NC_002951.2 :2045556-2046486 | q1 | q2 | OK | 492.583  | 89.0548 | -2.4676     | 2.1851    | 0.028882 | 0.604847 |
| gene1977 | gene1977 | SACOL1983 | gi 57650036 ref NC_002951.2 :2046680-2046854 | q1 | q2 | OK | 0        | 64.7725 | 1.79769e+30 | 1.79769e+ | 0.192088 | 0.842707 |
| gene1978 | gene1978 | aldA2     | gi 57650036 ref NC_002951.2 :2046905-2048285 | q1 | q2 | OK | 323.621  | 244.927 | -0.40195    | 0.342564  | 0.731927 | 0.978191 |
| gene1979 | gene1979 | SACOL1985 | gi 57650036 ref NC_002951.2 :2048404-2049433 | q1 | q2 | OK | 84.3383  | 90.371  | 0.099671    | -0.0948   | 0.924471 | 0.986264 |
| gene198  | gene198  | pflB      | gi 57650036 ref NC_002951.2 :239820-242070   | q1 | q2 | OK | 40.794   | 48.5453 | 0.250973    | -0.24672  | 0.805127 | 0.984151 |
| gene1980 | gene1980 | SACOL1986 | gi 57650036 ref NC_002951.2 :2049702-2050104 | q1 | q2 | OK | 22.567   | 64.0536 | 1.50507     | -0.79347  | 0.427503 | 0.954536 |
| gene1981 | gene1981 | SACOL1987 | gi 57650036 ref NC_002951.2 :2050676-2050850 | q1 | q2 | OK | 4950.99  | 178.124 | -4.79676    | 2.78372   | 0.005374 | 0.446636 |
| gene1982 | gene1982 | SACOL1988 | gi 57650036 ref NC_002951.2 :2051300-2052341 | q1 | q2 | OK | 30.8359  | 52.7999 | 0.775924    | -0.55377  | 0.57974  | 0.976548 |
| gene1983 | gene1983 | SACOL1989 | gi 57650036 ref NC_002951.2 :2052397-2053794 | q1 | q2 | OK | 67.5917  | 68.4717 | 0.0186616   | -0.01418  | 0.988683 | 0.997969 |
| gene1984 | gene1984 | SACOL1990 | gi 57650036 ref NC_002951.2 :2052397-2053794 | q1 | q2 | OK | 57.4825  | 58.5428 | 0.0263708   | -0.01377  | 0.989014 | 0.997969 |
| gene1985 | gene1985 | SACOL1991 | gi 57650036 ref NC_002951.2 :2053853-2054378 | q1 | q2 | OK | 44.6341  | 80.8498 | 0.857097    | -0.52593  | 0.598939 | 0.978191 |
| gene1986 | gene1986 | SACOL1992 | gi 57650036 ref NC_002951.2 :2054498-2055062 | q1 | q2 | OK | 221.49   | 124.108 | -0.835641   | 0.737012  | 0.461115 | 0.956269 |

|          |          |           |                                              |    |    |          |          |         |             |           |          |          |
|----------|----------|-----------|----------------------------------------------|----|----|----------|----------|---------|-------------|-----------|----------|----------|
| gene1987 | gene1987 | SACOL1993 | gi 57650036 ref NC_002951.2 :2055127-2057417 | q1 | q2 | OK       | 67.7058  | 51.8426 | -0.38514    | 0.241669  | 0.809036 | 0.984151 |
| gene1988 | gene1988 | SACOL1994 | gi 57650036 ref NC_002951.2 :2055127-2057417 | q1 | q2 | OK       | 31.2479  | 54.019  | 0.789711    | -0.45711  | 0.647594 | 0.978191 |
| gene1989 | gene1989 | SACOL1995 | gi 57650036 ref NC_002951.2 :2055127-2057417 | q1 | q2 | OK       | 16.8118  | 28.8302 | 0.778109    | -0.27813  | 0.780916 | 0.982219 |
| gene199  | gene199  | pflA      | gi 57650036 ref NC_002951.2 :242092-242848   | q1 | q2 | OK       | 28.887   | 71.8601 | 1.31477     | -0.86724  | 0.385812 | 0.940893 |
| gene1990 | gene1990 | SACOL1996 | gi 57650036 ref NC_002951.2 :2057417-2058691 | q1 | q2 | OK       | 18.0805  | 40.3732 | 1.15896     | -0.63208  | 0.527336 | 0.963286 |
| gene1991 | gene1991 | SACOL1997 | gi 57650036 ref NC_002951.2 :2057417-2058691 | q1 | q2 | OK       | 48.1888  | 61.2433 | 0.345853    | -0.13806  | 0.890192 | 0.984151 |
| gene1992 | gene1992 | SACOL1998 | gi 57650036 ref NC_002951.2 :2058954-2059131 | q1 | q2 | OK       | 83.7189  | 36.921  | -1.18111    | 0.498945  | 0.617818 | 0.978191 |
| gene1993 | gene1993 | SACOL1999 | gi 57650036 ref NC_002951.2 :2059373-2059472 | q1 | q2 | NOTEST 0 |          | 0       | 0           | 0         | 1        | 1        |
| gene1994 | gene1994 | SACOL2000 | gi 57650036 ref NC_002951.2 :2059671-2060958 | q1 | q2 | OK       | 180.18   | 87.8163 | -1.03688    | 1.00231   | 0.316196 | 0.927653 |
| gene1995 | gene1995 | map       | gi 57650036 ref NC_002951.2 :2061281-2063337 | q1 | q2 | OK       | 12.9394  | 31.354  | 1.27688     | -0.93953  | 0.347461 | 0.93284  |
| gene1996 | gene1996 | h1b       | gi 57650036 ref NC_002951.2 :2063725-2064718 | q1 | q2 | OK       | 26.6519  | 86.6941 | 1.70169     | -1.24677  | 0.212483 | 0.848911 |
| gene1997 | gene1997 | SACOL2004 | gi 57650036 ref NC_002951.2 :2064955-2065828 | q1 | q2 | OK       | 4.93387  | 32.7481 | 2.73062     | -1.46959  | 0.141673 | 0.842707 |
| gene1998 | gene1998 | SACOL2006 | gi 57650036 ref NC_002951.2 :2065993-2067049 | q1 | q2 | OK       | 4.36241  | 32.1761 | 2.88279     | -1.59381  | 0.110978 | 0.830835 |
| gene1999 | gene1999 | SACOL2007 | gi 57650036 ref NC_002951.2 :2067483-2068708 | q1 | q2 | OK       | 49.2736  | 86.8574 | 0.817833    | -0.73655  | 0.461395 | 0.956269 |
| gene2    | gene2    | SACOL0003 | gi 57650036 ref NC_002951.2 :3696-5051       | q1 | q2 | OK       | 797.974  | 349.414 | -1.1914     | 0.416768  | 0.676848 | 0.978191 |
| gene20   | gene20   | yycF      | gi 57650036 ref NC_002951.2 :24951-25653     | q1 | q2 | OK       | 191.993  | 194.465 | 0.0184569   | -0.01825  | 0.985443 | 0.997969 |
| gene200  | gene200  | SACOL0206 | gi 57650036 ref NC_002951.2 :242951-243146   | q1 | q2 | OK       | 0        | 4.49275 | 1.79769e+30 | 1.79769e+ | 0.207933 | 0.842707 |
| gene2000 | gene2000 | SACOL2009 | gi 57650036 ref NC_002951.2 :2069079-2069925 | q1 | q2 | OK       | 3.08874  | 23.8886 | 2.95123     | -1.50323  | 0.132779 | 0.842707 |
| gene2001 | gene2001 | SACOL2010 | gi 57650036 ref NC_002951.2 :2069986-2070898 | q1 | q2 | OK       | 1.55145  | 48.813  | 4.97557     | -2.61574  | 0.008903 | 0.498321 |
| gene2002 | gene2002 | SACOL2011 | gi 57650036 ref NC_002951.2 :2071058-2072366 | q1 | q2 | OK       | 21.6677  | 25.9096 | 0.257939    | -0.16891  | 0.865866 | 0.984151 |
| gene2003 | gene2003 | SACOL2012 | gi 57650036 ref NC_002951.2 :2073218-2073662 | q1 | q2 | OK       | 36.7257  | 29.5088 | -0.315642   | 0.167014  | 0.867359 | 0.984151 |
| gene2004 | gene2004 | SACOL2013 | gi 57650036 ref NC_002951.2 :2073767-2074205 | q1 | q2 | OK       | 30.7844  | 33.0983 | 0.104558    | -0.05491  | 0.956207 | 0.98956  |
| gene2005 | gene2005 | SACOL2014 | gi 57650036 ref NC_002951.2 :2074522-2075113 | q1 | q2 | OK       | 2.90688  | 49.1549 | 4.07979     | -2.04534  | 0.040821 | 0.643773 |
| gene2006 | gene2006 | SACOL2015 | gi 57650036 ref NC_002951.2 :2075454-2075929 | q1 | q2 | OK       | 0.848615 | 24.9342 | 4.87687     | -2.19321  | 0.028292 | 0.604847 |
| gene2007 | gene2007 | groEL     | gi 57650036 ref NC_002951.2 :2076023-2077640 | q1 | q2 | OK       | 67.7574  | 85.5097 | 0.335709    | -0.33178  | 0.740056 | 0.978191 |
| gene2008 | gene2008 | groES     | gi 57650036 ref NC_002951.2 :2077715-2078000 | q1 | q2 | OK       | 19.4437  | 49.3319 | 1.34322     | -0.63225  | 0.527226 | 0.963286 |
| gene2009 | gene2009 | SACOL2018 | gi 57650036 ref NC_002951.2 :2078174-2078918 | q1 | q2 | OK       | 105.078  | 34.4398 | -1.60931    | 1.1394    | 0.254536 | 0.890115 |
| gene201  | gene201  | SACOL0207 | gi 57650036 ref NC_002951.2 :243183-244947   | q1 | q2 | OK       | 7.76542  | 27.9246 | 1.8464      | -1.19862  | 0.230674 | 0.863636 |
| gene2010 | gene2010 | SACOL2019 | gi 57650036 ref NC_002951.2 :2078942-2080202 | q1 | q2 | OK       | 121.394  | 155.422 | 0.356489    | -0.34741  | 0.728285 | 0.978191 |
| gene2011 | gene2011 | SACOL2020 | gi 57650036 ref NC_002951.2 :2080398-2081025 | q1 | q2 | OK       | 135.553  | 98.9038 | -0.454762   | 0.377188  | 0.706034 | 0.978191 |
| gene2012 | gene2012 | SACOL2021 | gi 57650036 ref NC_002951.2 :2081385-2082171 | q1 | q2 | OK       | 74.0624  | 53.2288 | -0.476534   | 0.348453  | 0.7275   | 0.978191 |
| gene2013 | gene2013 | h1d       | gi 57650036 ref NC_002951.2 :2082767-2082902 | q1 | q2 | OK       | 4326.1   | 80.7366 | -5.7437     | 2.58881   | 0.009631 | 0.499638 |
| gene2014 | gene2014 | agrB      | gi 57650036 ref NC_002951.2 :2083137-2083844 | q1 | q2 | OK       | 1948.44  | 526.927 | -1.88664    | 1.53585   | 0.124576 | 0.842707 |

|          |          |            |                                              |    |    |          |         |         |            |          |          |          |
|----------|----------|------------|----------------------------------------------|----|----|----------|---------|---------|------------|----------|----------|----------|
| gene2015 | gene2015 | agrD       | gi 57650036 ref NC_002951.2 :2083137-2083844 | q1 | q2 | OK       | 833.848 | 264.413 | -1.65699   | 0.083375 | 0.933554 | 0.987716 |
| gene2016 | gene2016 | argC2      | gi 57650036 ref NC_002951.2 :2083868-2085161 | q1 | q2 | OK       | 819.942 | 221.399 | -1.88887   | 1.53743  | 0.124188 | 0.842707 |
| gene2017 | gene2017 | agrA       | gi 57650036 ref NC_002951.2 :2085179-2085896 | q1 | q2 | OK       | 1445.96 | 330.365 | -2.12989   | 1.79153  | 0.073208 | 0.754145 |
| gene2018 | gene2018 | SACOL2028  | gi 57650036 ref NC_002951.2 :2086262-2088703 | q1 | q2 | OK       | 118.927 | 73.5227 | -0.693811  | 0.4206   | 0.674047 | 0.978191 |
| gene2019 | gene2019 | cscA       | gi 57650036 ref NC_002951.2 :2086262-2088703 | q1 | q2 | OK       | 85.6856 | 76.7365 | -0.15914   | 0.116814 | 0.907008 | 0.984151 |
| gene202  | gene202  | SACOL0208  | gi 57650036 ref NC_002951.2 :245110-245455   | q1 | q2 | OK       | 22.0329 | 13.0077 | -0.760292  | 0.353078 | 0.72403  | 0.978191 |
| gene2020 | gene2020 | scrR       | gi 57650036 ref NC_002951.2 :2088851-2089802 | q1 | q2 | OK       | 87.2152 | 66.1343 | -0.399181  | 0.351487 | 0.725223 | 0.978191 |
| gene2021 | gene2021 | SACOL2031  | gi 57650036 ref NC_002951.2 :2089984-2091235 | q1 | q2 | OK       | 1.45535 | 41.4324 | 4.83132    | -2.65655 | 0.007895 | 0.480028 |
| gene2022 | gene2022 | SACOL2033  | gi 57650036 ref NC_002951.2 :2091441-2091666 | q1 | q2 | OK       | 11.4446 | 20.4178 | 0.835166   | -0.35024 | 0.726158 | 0.978191 |
| gene2023 | gene2023 | SACOL2034  | gi 57650036 ref NC_002951.2 :2091725-2092805 | q1 | q2 | OK       | 6.98379 | 65.5743 | 3.23105    | -2.02667 | 0.042696 | 0.64903  |
| gene2024 | gene2024 | SACOL2035  | gi 57650036 ref NC_002951.2 :2093108-2093744 | q1 | q2 | OK       | 251.724 | 125.137 | -1.00833   | 0.941226 | 0.346589 | 0.93284  |
| gene2025 | gene2025 | SACOL2036  | gi 57650036 ref NC_002951.2 :2093996-2095925 | q1 | q2 | OK       | 22.1696 | 47.1242 | 1.08789    | -0.90804 | 0.363858 | 0.93284  |
| gene2026 | gene2026 | SACOL2037  | gi 57650036 ref NC_002951.2 :2096286-2097897 | q1 | q2 | OK       | 9.85346 | 27.8094 | 1.49687    | -0.96923 | 0.33243  | 0.927653 |
| gene2027 | gene2027 | SACOL2038  | gi 57650036 ref NC_002951.2 :2097998-2100531 | q1 | q2 | OK       | 81.4592 | 56.1191 | -0.537586  | 0.413327 | 0.679367 | 0.978191 |
| gene2028 | gene2028 | SACOL2039  | gi 57650036 ref NC_002951.2 :2097998-2100531 | q1 | q2 | OK       | 50.3557 | 56.873  | 0.17559    | -0.06748 | 0.946198 | 0.987716 |
| gene2029 | gene2029 | SACOL2040  | gi 57650036 ref NC_002951.2 :2097998-2100531 | q1 | q2 | OK       | 21.3895 | 32.1099 | 0.586118   | -0.20652 | 0.836389 | 0.984151 |
| gene203  | gene203  | SACOL0209  | gi 57650036 ref NC_002951.2 :245644-247555   | q1 | q2 | OK       | 2.78494 | 5.43996 | 0.965953   | -0.49997 | 0.617095 | 0.978191 |
| gene2030 | gene2030 | SACOL2041  | gi 57650036 ref NC_002951.2 :2097998-2100531 | q1 | q2 | OK       | 33.2268 | 32.6545 | -0.0250678 | 0.007143 | 0.994301 | 0.998672 |
| gene2031 | gene2031 | ilvD       | gi 57650036 ref NC_002951.2 :2101068-2102757 | q1 | q2 | OK       | 14.1392 | 34.0838 | 1.26938    | -0.89915 | 0.368571 | 0.932839 |
| gene2032 | gene2032 | ilvB       | gi 57650036 ref NC_002951.2 :2102784-2104808 | q1 | q2 | OK       | 29.0073 | 41.1961 | 0.506089   | -0.41905 | 0.675182 | 0.978191 |
| gene2033 | gene2033 | SACOL2044  | gi 57650036 ref NC_002951.2 :2102784-2104808 | q1 | q2 | OK       | 30.4141 | 24.3554 | -0.320497  | 0.049489 | 0.960529 | 0.989588 |
| gene2034 | gene2034 | ilvC       | gi 57650036 ref NC_002951.2 :2104944-2105949 | q1 | q2 | OK       | 28.1561 | 67.8294 | 1.26846    | -0.9168  | 0.359245 | 0.93284  |
| gene2035 | gene2035 | leuA       | gi 57650036 ref NC_002951.2 :2105978-2107508 | q1 | q2 | OK       | 32.0472 | 48.8479 | 0.608098   | -0.5124  | 0.608368 | 0.978191 |
| gene2036 | gene2036 | leuB       | gi 57650036 ref NC_002951.2 :2107510-2108557 | q1 | q2 | OK       | 29.3141 | 32.7556 | 0.160145   | -0.10481 | 0.916528 | 0.984151 |
| gene2037 | gene2037 | leuC       | gi 57650036 ref NC_002951.2 :2108570-2109941 | q1 | q2 | OK       | 25.6906 | 34.4037 | 0.421324   | -0.30217 | 0.762525 | 0.978191 |
| gene2038 | gene2038 | leuD       | gi 57650036 ref NC_002951.2 :2109941-2110514 | q1 | q2 | OK       | 15.8939 | 28.4172 | 0.83829    | -0.44347 | 0.657424 | 0.978191 |
| gene2039 | gene2039 | ilvA2      | gi 57650036 ref NC_002951.2 :2110528-2111797 | q1 | q2 | OK       | 24.315  | 27.0342 | 0.152941   | -0.10124 | 0.919357 | 0.984517 |
| gene204  | gene204  | SACOL0210  | gi 57650036 ref NC_002951.2 :248020-249342   | q1 | q2 | NOTEST 0 |         | 0       | 0          | 0        | 1        | 1        |
| gene2040 | gene2040 | rrfE       | gi 57650036 ref NC_002951.2 :2112006-2112121 | q1 | q2 | OK       | 490780  | 195142  | -1.33055   | 1.31669  | 0.187942 | 0.842707 |
| gene2041 | gene2041 | rrfE       | gi 57650036 ref NC_002951.2 :2112193-2115116 | q1 | q2 | OK       | 37274.6 | 19123.6 | -0.962839  | 1.3438   | 0.179013 | 0.842707 |
| gene2042 | gene2042 | rrsE       | gi 57650036 ref NC_002951.2 :2115662-2117217 | q1 | q2 | OK       | 13501.3 | 7787.99 | -0.793779  | 0.636128 | 0.524693 | 0.963286 |
| gene2043 | gene2043 | SACOL_trNA | gi 57650036 ref NC_002951.2 :2117334-2117408 | q1 | q2 | NOTEST 0 |         | 0       | 0          | 0        | 1        | 1        |
| gene2044 | gene2044 | SACOL_trNA | gi 57650036 ref NC_002951.2 :2117427-2117513 | q1 | q2 | NOTEST 0 |         | 0       | 0          | 0        | 1        | 1        |

|          |          |           |                                              |    |    |          |         |         |           |          |          |          |
|----------|----------|-----------|----------------------------------------------|----|----|----------|---------|---------|-----------|----------|----------|----------|
| gene2045 | gene2045 | SACOL2052 | gi 57650036 ref NC_002951.2 :2118159-2120758 | q1 | q2 | OK       | 48.6143 | 32.8512 | -0.565437 | 0.175012 | 0.86107  | 0.984151 |
| gene2046 | gene2046 | SACOL2053 | gi 57650036 ref NC_002951.2 :2118159-2120758 | q1 | q2 | OK       | 57.1858 | 38.7501 | -0.56146  | 0.524379 | 0.600015 | 0.978191 |
| gene2047 | gene2047 | rpoF      | gi 57650036 ref NC_002951.2 :2121191-2122416 | q1 | q2 | OK       | 350.803 | 235.043 | -0.577739 | 0.483715 | 0.628588 | 0.978191 |
| gene2048 | gene2048 | rsbW      | gi 57650036 ref NC_002951.2 :2121191-2122416 | q1 | q2 | OK       | 147.299 | 104.455 | -0.495866 | 0.193482 | 0.846581 | 0.984151 |
| gene2049 | gene2049 | rsbV      | gi 57650036 ref NC_002951.2 :2122417-2122744 | q1 | q2 | OK       | 302.456 | 211.314 | -0.517336 | 0.35879  | 0.719752 | 0.978191 |
| gene205  | gene205  | SACOL0211 | gi 57650036 ref NC_002951.2 :248020-249342   | q1 | q2 | OK       | 120.866 | 86.3185 | -0.485668 | 0.472572 | 0.636518 | 0.978191 |
| gene2050 | gene2050 | rsbU      | gi 57650036 ref NC_002951.2 :2122863-2123865 | q1 | q2 | OK       | 99.0635 | 46.0298 | -1.10579  | 0.918946 | 0.358124 | 0.93284  |
| gene2051 | gene2051 | SACOL2058 | gi 57650036 ref NC_002951.2 :2124214-2124744 | q1 | q2 | OK       | 157.335 | 93.1154 | -0.756747 | 0.418903 | 0.675287 | 0.978191 |
| gene2052 | gene2052 | SACOL2059 | gi 57650036 ref NC_002951.2 :2124214-2124744 | q1 | q2 | OK       | 528.565 | 17.8233 | -4.89024  | 0.447796 | 0.654301 | 0.978191 |
| gene2053 | gene2053 | alr       | gi 57650036 ref NC_002951.2 :2124828-2125977 | q1 | q2 | OK       | 131.108 | 64.0624 | -1.03321  | 0.980274 | 0.326951 | 0.927653 |
| gene2054 | gene2054 | acpS      | gi 57650036 ref NC_002951.2 :2126042-2126402 | q1 | q2 | OK       | 93.2321 | 66.1023 | -0.496127 | 0.280491 | 0.779101 | 0.982219 |
| gene2055 | gene2055 | SACOL2062 | gi 57650036 ref NC_002951.2 :2126405-2128939 | q1 | q2 | OK       | 67.6376 | 50.734  | -0.414872 | 0.150121 | 0.880669 | 0.984151 |
| gene2056 | gene2056 | SACOL2063 | gi 57650036 ref NC_002951.2 :2126405-2128939 | q1 | q2 | OK       | 78.508  | 58.8766 | -0.415145 | 0.348602 | 0.727388 | 0.978191 |
| gene2057 | gene2057 | SACOL2064 | gi 57650036 ref NC_002951.2 :2126405-2128939 | q1 | q2 | OK       | 61.5826 | 50.0958 | -0.297835 | 0.102046 | 0.91872  | 0.984258 |
| gene2058 | gene2058 | SACOL2065 | gi 57650036 ref NC_002951.2 :2129034-2129708 | q1 | q2 | NOTEST 0 |         | 0       | 0         | 0        | 1        | 1        |
| gene2059 | gene2059 | kdpC      | gi 57650036 ref NC_002951.2 :2129034-2129708 | q1 | q2 | OK       | 20.2567 | 35.4615 | 0.807852  | -0.34478 | 0.73026  | 0.978191 |
| gene206  | gene206  | SACOL0212 | gi 57650036 ref NC_002951.2 :249371-251633   | q1 | q2 | OK       | 110.659 | 69.451  | -0.67205  | 0.636652 | 0.524351 | 0.963286 |
| gene2060 | gene2060 | kdpB      | gi 57650036 ref NC_002951.2 :2129727-2131755 | q1 | q2 | OK       | 5.56385 | 51.065  | 3.19818   | -2.16566 | 0.030337 | 0.604847 |
| gene2061 | gene2061 | kdpA      | gi 57650036 ref NC_002951.2 :2131773-2133450 | q1 | q2 | OK       | 2.49847 | 41.7098 | 4.06127   | -2.4518  | 0.014214 | 0.500083 |
| gene2062 | gene2062 | kdpF      | gi 57650036 ref NC_002951.2 :2133473-2133584 | q1 | q2 | NOTEST 0 |         | 0       | 0         | 0        | 1        | 1        |
| gene2063 | gene2063 | kdpD      | gi 57650036 ref NC_002951.2 :2133721-2137074 | q1 | q2 | OK       | 6.22985 | 27.4417 | 2.1391    | -1.36077 | 0.173585 | 0.842707 |
| gene2064 | gene2064 | kdpE      | gi 57650036 ref NC_002951.2 :2133721-2137074 | q1 | q2 | OK       | 6.33033 | 37.6601 | 2.57268   | -0.78794 | 0.43073  | 0.956269 |
| gene2065 | gene2065 | SACOL2072 | gi 57650036 ref NC_002951.2 :2137442-2138963 | q1 | q2 | OK       | 285.486 | 52.097  | -2.45415  | 2.17041  | 0.029976 | 0.604847 |
| gene2066 | gene2066 | murF      | gi 57650036 ref NC_002951.2 :2139479-2140838 | q1 | q2 | OK       | 122.85  | 88.5481 | -0.472362 | 0.465667 | 0.641454 | 0.978191 |
| gene2067 | gene2067 | ddl       | gi 57650036 ref NC_002951.2 :2140852-2141923 | q1 | q2 | OK       | 128.808 | 83.2442 | -0.629798 | 0.613579 | 0.539493 | 0.965252 |
| gene2068 | gene2068 | ftsW      | gi 57650036 ref NC_002951.2 :2142240-2143443 | q1 | q2 | OK       | 140.891 | 74.1316 | -0.926416 | 0.899859 | 0.368195 | 0.93284  |
| gene2069 | gene2069 | SACOL2076 | gi 57650036 ref NC_002951.2 :2143706-2143844 | q1 | q2 | OK       | 87731.3 | 9073.56 | -3.27335  | 2.52426  | 0.011594 | 0.500083 |
| gene207  | gene207  | SACOL0213 | gi 57650036 ref NC_002951.2 :251818-253030   | q1 | q2 | OK       | 135.069 | 90.5201 | -0.577392 | 0.568936 | 0.5694   | 0.976548 |
| gene2070 | gene2070 | SACOL2077 | gi 57650036 ref NC_002951.2 :2143971-2144181 | q1 | q2 | OK       | 22.322  | 73.8246 | 1.72563   | -0.75903 | 0.447836 | 0.956269 |
| gene2071 | gene2071 | SACOL2078 | gi 57650036 ref NC_002951.2 :2144192-2144486 | q1 | q2 | OK       | 5.1173  | 15.1363 | 1.56456   | -0.67025 | 0.502699 | 0.963286 |
| gene2072 | gene2072 | cls2      | gi 57650036 ref NC_002951.2 :2144651-2146136 | q1 | q2 | OK       | 39.964  | 51.2658 | 0.359295  | -0.31797 | 0.750505 | 0.978191 |
| gene2073 | gene2073 | SACOL2080 | gi 57650036 ref NC_002951.2 :2146163-2146811 | q1 | q2 | OK       | 52.8471 | 39.5015 | -0.419916 | 0.259443 | 0.795293 | 0.983954 |
| gene2074 | gene2074 | SACOL2081 | gi 57650036 ref NC_002951.2 :2146985-2147078 | q1 | q2 | NOTEST 0 |         | 0       | 0         | 0        | 1        | 1        |

|          |          |           |                                              |    |    |    |         |         |           |          |          |          |
|----------|----------|-----------|----------------------------------------------|----|----|----|---------|---------|-----------|----------|----------|----------|
| gene2075 | gene2075 | SACOL2082 | gi 57650036 ref NC_002951.2 :2147623-2148496 | q1 | q2 | OK | 474.967 | 110.334 | -2.10596  | 1.91635  | 0.055321 | 0.696046 |
| gene2076 | gene2076 | thiE      | gi 57650036 ref NC_002951.2 :2148581-2149223 | q1 | q2 | OK | 3.57366 | 25.0685 | 2.8104    | -1.38514 | 0.166009 | 0.842707 |
| gene2077 | gene2077 | thiM      | gi 57650036 ref NC_002951.2 :2149224-2151512 | q1 | q2 | OK | 5.63697 | 24.6186 | 2.12676   | -0.82322 | 0.410383 | 0.940909 |
| gene2078 | gene2078 | thiD2     | gi 57650036 ref NC_002951.2 :2149224-2151512 | q1 | q2 | OK | 4.22003 | 65.3396 | 3.95263   | -1.61386 | 0.106559 | 0.818963 |
| gene2079 | gene2079 | SACOL2086 | gi 57650036 ref NC_002951.2 :2149224-2151512 | q1 | q2 | OK | 2.7479  | 26.4448 | 3.26658   | -0.90301 | 0.366523 | 0.93284  |
| gene208  | gene208  | SACOL0214 | gi 57650036 ref NC_002951.2 :253141-254647   | q1 | q2 | OK | 146.412 | 82.4639 | -0.828195 | 0.802729 | 0.422131 | 0.949284 |
| gene2080 | gene2080 | SACOL2088 | gi 57650036 ref NC_002951.2 :2151897-2152593 | q1 | q2 | OK | 109.424 | 52.683  | -1.05452  | 0.778001 | 0.436568 | 0.956269 |
| gene2081 | gene2081 | SACOL2089 | gi 57650036 ref NC_002951.2 :2152981-2153377 | q1 | q2 | OK | 6.13747 | 32.6793 | 2.41266   | -1.13623 | 0.255862 | 0.890872 |
| gene2082 | gene2082 | ywpF      | gi 57650036 ref NC_002951.2 :2153570-2154011 | q1 | q2 | OK | 103.835 | 38.03   | -1.44909  | 0.84658  | 0.397229 | 0.940909 |
| gene2083 | gene2083 | fabZ      | gi 57650036 ref NC_002951.2 :2154069-2154510 | q1 | q2 | OK | 272.323 | 126.767 | -1.10314  | 0.861882 | 0.388752 | 0.940909 |
| gene2084 | gene2084 | murAA     | gi 57650036 ref NC_002951.2 :2154543-2155809 | q1 | q2 | OK | 203.072 | 229.257 | 0.174979  | -0.16039 | 0.872577 | 0.984151 |
| gene2085 | gene2085 | SACOL2093 | gi 57650036 ref NC_002951.2 :2155919-2156153 | q1 | q2 | OK | 269.675 | 231.115 | -0.222612 | 0.125334 | 0.900259 | 0.984151 |
| gene2086 | gene2086 | atpC      | gi 57650036 ref NC_002951.2 :2156714-2157119 | q1 | q2 | OK | 1104.48 | 110.226 | -3.32483  | 2.4962   | 0.012553 | 0.500083 |
| gene2087 | gene2087 | atpD      | gi 57650036 ref NC_002951.2 :2157138-2158551 | q1 | q2 | OK | 415.751 | 119.522 | -1.79844  | 1.56708  | 0.117095 | 0.838847 |
| gene2088 | gene2088 | atpG      | gi 57650036 ref NC_002951.2 :2158572-2159439 | q1 | q2 | OK | 420.634 | 100.958 | -2.05881  | 1.88249  | 0.05977  | 0.706192 |
| gene2089 | gene2089 | atpA      | gi 57650036 ref NC_002951.2 :2159469-2160978 | q1 | q2 | OK | 442.364 | 121.544 | -1.86375  | 1.59938  | 0.109737 | 0.829015 |
| gene209  | gene209  | SACOL0215 | gi 57650036 ref NC_002951.2 :254672-256244   | q1 | q2 | OK | 476.824 | 235.183 | -1.01967  | 0.823882 | 0.410007 | 0.940909 |
| gene2090 | gene2090 | atpH      | gi 57650036 ref NC_002951.2 :2160999-2162060 | q1 | q2 | OK | 344.909 | 79.5254 | -2.11673  | 1.40114  | 0.161172 | 0.842707 |
| gene2091 | gene2091 | atpF      | gi 57650036 ref NC_002951.2 :2160999-2162060 | q1 | q2 | OK | 274.067 | 97.753  | -1.48732  | 0.955683 | 0.339232 | 0.931394 |
| gene2092 | gene2092 | atpE      | gi 57650036 ref NC_002951.2 :2162257-2162470 | q1 | q2 | OK | 1342.66 | 146.836 | -3.19282  | 1.9015   | 0.057236 | 0.696046 |
| gene2093 | gene2093 | atpB      | gi 57650036 ref NC_002951.2 :2162512-2163241 | q1 | q2 | OK | 436.167 | 112.537 | -1.95448  | 1.79283  | 0.073    | 0.754145 |
| gene2094 | gene2094 | SACOL2102 | gi 57650036 ref NC_002951.2 :2163261-2163615 | q1 | q2 | OK | 375.599 | 90.5986 | -2.05163  | 1.39771  | 0.1622   | 0.842707 |
| gene2095 | gene2095 | SACOL2103 | gi 57650036 ref NC_002951.2 :2163781-2164909 | q1 | q2 | OK | 399.15  | 175     | -1.18957  | 1.06379  | 0.287423 | 0.921417 |
| gene2096 | gene2096 | upp       | gi 57650036 ref NC_002951.2 :2164932-2165562 | q1 | q2 | OK | 252.286 | 103.436 | -1.28632  | 1.1421   | 0.253414 | 0.889805 |
| gene2097 | gene2097 | glyA      | gi 57650036 ref NC_002951.2 :2165589-2166828 | q1 | q2 | OK | 385.809 | 212.615 | -0.85964  | 0.747133 | 0.454983 | 0.956269 |
| gene2098 | gene2098 | SACOL2106 | gi 57650036 ref NC_002951.2 :2166854-2167379 | q1 | q2 | OK | 277.015 | 154.602 | -0.841404 | 0.768173 | 0.442384 | 0.956269 |
| gene2099 | gene2099 | SACOL2107 | gi 57650036 ref NC_002951.2 :2167485-2168957 | q1 | q2 | OK | 68.1663 | 27.5961 | -1.30459  | 0.462321 | 0.643851 | 0.978191 |
| gene21   | gene21   | yycG      | gi 57650036 ref NC_002951.2 :25665-28819     | q1 | q2 | OK | 201.029 | 125.15  | -0.683737 | 0.449438 | 0.653116 | 0.978191 |
| gene210  | gene210  | SACOL0216 | gi 57650036 ref NC_002951.2 :256690-257833   | q1 | q2 | OK | 21.6067 | 44.6618 | 1.04756   | -0.7168  | 0.473498 | 0.956269 |
| gene2100 | gene2100 | SACOL2108 | gi 57650036 ref NC_002951.2 :2167485-2168957 | q1 | q2 | OK | 25.9178 | 51.6511 | 0.994854  | -0.64511 | 0.518858 | 0.963286 |
| gene2101 | gene2101 | SACOL2109 | gi 57650036 ref NC_002951.2 :2169031-2170931 | q1 | q2 | OK | 129.541 | 44.8824 | -1.52919  | 1.0167   | 0.309298 | 0.927653 |
| gene2102 | gene2102 | prfA      | gi 57650036 ref NC_002951.2 :2169031-2170931 | q1 | q2 | OK | 74.3384 | 44.4141 | -0.743092 | 0.506211 | 0.612709 | 0.978191 |
| gene2103 | gene2103 | tdk       | gi 57650036 ref NC_002951.2 :2170931-2171531 | q1 | q2 | OK | 74.9073 | 63.789  | -0.2318   | 0.153512 | 0.877994 | 0.984151 |

|          |          |           |                                              |    |    |          |         |         |             |           |          |          |
|----------|----------|-----------|----------------------------------------------|----|----|----------|---------|---------|-------------|-----------|----------|----------|
| gene2104 | gene2104 | rpmE2     | gi 57650036 ref NC_002951.2 :2171877-2172132 | q1 | q2 | OK       | 1011.27 | 51.5762 | -4.29332    | 2.58209   | 0.00982  | 0.499638 |
| gene2105 | gene2105 | rho       | gi 57650036 ref NC_002951.2 :2172249-2173566 | q1 | q2 | OK       | 208.642 | 78.1365 | -1.41696    | 1.34469   | 0.178726 | 0.842707 |
| gene2106 | gene2106 | SACOL2114 | gi 57650036 ref NC_002951.2 :2173812-2175240 | q1 | q2 | OK       | 293.342 | 399.123 | 0.444248    | -0.36287  | 0.716705 | 0.978191 |
| gene2107 | gene2107 | SACOL2115 | gi 57650036 ref NC_002951.2 :2175477-2175813 | q1 | q2 | OK       | 1522.22 | 907.353 | -0.746436   | 0.721743  | 0.470453 | 0.956269 |
| gene2108 | gene2108 | murAB     | gi 57650036 ref NC_002951.2 :2175901-2177161 | q1 | q2 | OK       | 157.05  | 98.5482 | -0.672322   | 0.657707  | 0.510727 | 0.963286 |
| gene2109 | gene2109 | fbaA      | gi 57650036 ref NC_002951.2 :2177626-2178487 | q1 | q2 | OK       | 312.664 | 94.0643 | -1.7329     | 1.61291   | 0.106764 | 0.818963 |
| gene211  | gene211  | SACOL0217 | gi 57650036 ref NC_002951.2 :258146-259622   | q1 | q2 | OK       | 21.3195 | 28.9152 | 0.439652    | -0.30533  | 0.760113 | 0.978191 |
| gene2110 | gene2110 | SACOL2118 | gi 57650036 ref NC_002951.2 :2178704-2179226 | q1 | q2 | OK       | 22.183  | 32.6881 | 0.559311    | -0.29938  | 0.764651 | 0.978191 |
| gene2111 | gene2111 | pyrG      | gi 57650036 ref NC_002951.2 :2179334-2180945 | q1 | q2 | OK       | 93.2999 | 48.0008 | -0.958818   | 0.923048  | 0.355982 | 0.93284  |
| gene2112 | gene2112 | rpoE      | gi 57650036 ref NC_002951.2 :2181280-2181811 | q1 | q2 | OK       | 225.078 | 97.6535 | -1.20468    | 0.966556  | 0.333766 | 0.927653 |
| gene2113 | gene2113 | SACOL2121 | gi 57650036 ref NC_002951.2 :2181922-2182783 | q1 | q2 | OK       | 54.289  | 33.9504 | -0.677233   | 0.454566  | 0.649422 | 0.978191 |
| gene2114 | gene2114 | SACOL2122 | gi 57650036 ref NC_002951.2 :2183206-2184010 | q1 | q2 | OK       | 45.2675 | 34.3445 | -0.398396   | 0.254599  | 0.799032 | 0.984151 |
| gene2115 | gene2115 | SACOL2123 | gi 57650036 ref NC_002951.2 :2184139-2184811 | q1 | q2 | OK       | 68.1206 | 45.3361 | -0.587431   | 0.384572  | 0.700554 | 0.978191 |
| gene2116 | gene2116 | SACOL2124 | gi 57650036 ref NC_002951.2 :2185209-2187587 | q1 | q2 | OK       | 125.688 | 63.4055 | -0.987172   | 0.63023   | 0.528544 | 0.963286 |
| gene2117 | gene2117 | SACOL2125 | gi 57650036 ref NC_002951.2 :2185209-2187587 | q1 | q2 | OK       | 79.0962 | 114.986 | 0.539777    | -0.35392  | 0.723397 | 0.978191 |
| gene2118 | gene2118 | luxS      | gi 57650036 ref NC_002951.2 :2187897-2188368 | q1 | q2 | OK       | 285.393 | 103.319 | -1.46585    | 1.14322   | 0.252948 | 0.889805 |
| gene2119 | gene2119 | SACOL2127 | gi 57650036 ref NC_002951.2 :2188519-2188870 | q1 | q2 | OK       | 677.531 | 102.245 | -2.72825    | 1.97185   | 0.048626 | 0.673473 |
| gene212  | gene212  | SACOL0218 | gi 57650036 ref NC_002951.2 :259819-260176   | q1 | q2 | OK       | 9.35645 | 26.0468 | 1.47707     | -0.68672  | 0.49226  | 0.963286 |
| gene2120 | gene2120 | pdp       | gi 57650036 ref NC_002951.2 :2188883-2190185 | q1 | q2 | OK       | 196.689 | 120.238 | -0.710018   | 0.678385  | 0.497527 | 0.963286 |
| gene2121 | gene2121 | deoC2     | gi 57650036 ref NC_002951.2 :2190463-2191126 | q1 | q2 | OK       | 134.17  | 112.825 | -0.249985   | 0.220654  | 0.825362 | 0.984151 |
| gene2122 | gene2122 | deoD      | gi 57650036 ref NC_002951.2 :2191440-2192151 | q1 | q2 | OK       | 233.149 | 51.987  | -2.16503    | 1.68677   | 0.091649 | 0.784058 |
| gene2123 | gene2123 | SACOL2131 | gi 57650036 ref NC_002951.2 :2192271-2192715 | q1 | q2 | OK       | 1510.58 | 2017.11 | 0.417183    | -0.34101  | 0.733097 | 0.978191 |
| gene2124 | gene2124 | SACOL2132 | gi 57650036 ref NC_002951.2 :2192914-2193328 | q1 | q2 | OK       | 46.8371 | 47.947  | 0.033789    | -0.01848  | 0.985255 | 0.997969 |
| gene2125 | gene2125 | SACOL2133 | gi 57650036 ref NC_002951.2 :2193785-2195159 | q1 | q2 | OK       | 98.4095 | 49.8352 | -0.981634   | 0.9249    | 0.355018 | 0.93284  |
| gene2126 | gene2126 | SACOL2134 | gi 57650036 ref NC_002951.2 :2195830-2196061 | q1 | q2 | OK       | 73.0536 | 46.9548 | -0.637682   | 0.299018  | 0.764926 | 0.978191 |
| gene2127 | gene2127 | manA1     | gi 57650036 ref NC_002951.2 :2196091-2197030 | q1 | q2 | OK       | 89.8725 | 61.8759 | -0.538501   | 0.465659  | 0.641459 | 0.978191 |
| gene2128 | gene2128 | SACOL2136 | gi 57650036 ref NC_002951.2 :2197464-2198130 | q1 | q2 | OK       | 216.307 | 323.259 | 0.57961     | -0.56747  | 0.570396 | 0.976548 |
| gene2129 | gene2129 | czrA      | gi 57650036 ref NC_002951.2 :2198281-2198602 | q1 | q2 | OK       | 374.111 | 54.9188 | -2.76809    | 1.68955   | 0.091115 | 0.784058 |
| gene213  | gene213  | SACOL0219 | gi 57650036 ref NC_002951.2 :260332-260506   | q1 | q2 | NOTEST 0 |         | 0       | 0           | 0         | 1        | 1        |
| gene2130 | gene2130 | SACOL2138 | gi 57650036 ref NC_002951.2 :2198603-2199584 | q1 | q2 | OK       | 269.332 | 41.1536 | -2.71029    | 2.15028   | 0.031533 | 0.604847 |
| gene2131 | gene2131 | SACOL2139 | gi 57650036 ref NC_002951.2 :2199793-2200941 | q1 | q2 | NOTEST 0 |         | 0       | 0           | 0         | 1        | 1        |
| gene2132 | gene2132 | SACOL2140 | gi 57650036 ref NC_002951.2 :2199793-2200941 | q1 | q2 | OK       | 1039.47 | 145.19  | -2.83984    | 2.36452   | 0.018054 | 0.500083 |
| gene2133 | gene2133 | SACOL2141 | gi 57650036 ref NC_002951.2 :2201903-2202107 | q1 | q2 | OK       | 0       | 74.4326 | 1.79769e+30 | 1.79769e+ | 0.173559 | 0.842707 |

|          |          |            |                                              |    |    |          |          |         |              |           |          |          |
|----------|----------|------------|----------------------------------------------|----|----|----------|----------|---------|--------------|-----------|----------|----------|
| gene2134 | gene2134 | SACOL2142  | gi 57650036 ref NC_002951.2 :2202165-2203302 | q1 | q2 | OK       | 20.8132  | 37.7473 | 0.858877     | -0.56718  | 0.570594 | 0.976548 |
| gene2135 | gene2135 | SACOL2143  | gi 57650036 ref NC_002951.2 :2204387-2205257 | q1 | q2 | OK       | 87.2392  | 85.7626 | -0.0246278   | 0.021915  | 0.982516 | 0.997969 |
| gene2136 | gene2136 | SACOL2144  | gi 57650036 ref NC_002951.2 :2205312-2206095 | q1 | q2 | OK       | 19.0922  | 44.1684 | 1.21003      | -0.7235   | 0.469372 | 0.956269 |
| gene2137 | gene2137 | glmS       | gi 57650036 ref NC_002951.2 :2206326-2208132 | q1 | q2 | OK       | 359.337  | 48.5472 | -2.88788     | 2.48065   | 0.013114 | 0.500083 |
| gene2138 | gene2138 | SACOL2146  | gi 57650036 ref NC_002951.2 :2208812-2210351 | q1 | q2 | OK       | 13.6405  | 30.9991 | 1.18433      | -0.79769  | 0.425052 | 0.951235 |
| gene2139 | gene2139 | SACOL2147  | gi 57650036 ref NC_002951.2 :2210385-2212518 | q1 | q2 | OK       | 31.2117  | 50.1575 | 0.684377     | -0.64486  | 0.519019 | 0.963286 |
| gene214  | gene214  | SACOL0220  | gi 57650036 ref NC_002951.2 :260531-261677   | q1 | q2 | OK       | 103.745  | 71.7189 | -0.532622    | 0.514041  | 0.607224 | 0.978191 |
| gene2140 | gene2140 | SACOL2148  | gi 57650036 ref NC_002951.2 :2212529-2214070 | q1 | q2 | OK       | 126.866  | 198.02  | 0.642341     | -0.33969  | 0.73409  | 0.978191 |
| gene2141 | gene2141 | mtlD       | gi 57650036 ref NC_002951.2 :2212529-2214070 | q1 | q2 | OK       | 78.8261  | 121.603 | 0.625437     | -0.51356  | 0.607562 | 0.978191 |
| gene2142 | gene2142 | fmtB       | gi 57650036 ref NC_002951.2 :2214388-2221825 | q1 | q2 | OK       | 2.81316  | 34.7171 | 3.62538      | -2.61161  | 0.009012 | 0.498321 |
| gene2143 | gene2143 | glmM       | gi 57650036 ref NC_002951.2 :2222101-2223457 | q1 | q2 | OK       | 201.645  | 115.425 | -0.804865    | 0.763486  | 0.445174 | 0.956269 |
| gene2144 | gene2144 | SACOL2152  | gi 57650036 ref NC_002951.2 :2223483-2224416 | q1 | q2 | OK       | 67.4475  | 46.7429 | -0.52902     | 0.405099  | 0.685404 | 0.978191 |
| gene2145 | gene2145 | SACOL2153  | gi 57650036 ref NC_002951.2 :2224417-2225227 | q1 | q2 | OK       | 127.492  | 77.2938 | -0.721981    | 0.640279  | 0.521991 | 0.963286 |
| gene2146 | gene2146 | rocF       | gi 57650036 ref NC_002951.2 :2225415-2226324 | q1 | q2 | OK       | 676.9    | 252.636 | -1.42188     | 1.23332   | 0.217455 | 0.850298 |
| gene2147 | gene2147 | SACOL2155  | gi 57650036 ref NC_002951.2 :2226549-2227752 | q1 | q2 | OK       | 0.654291 | 9.21468 | 3.81593      | -1.78505  | 0.074253 | 0.754145 |
| gene2149 | gene2149 | SACOL_tRNA | gi 57650036 ref NC_002951.2 :2228058-2228133 | q1 | q2 | NOTEST 0 |          | 0       | 0            | 0         | 1        | 1        |
| gene215  | gene215  | ldh1       | gi 57650036 ref NC_002951.2 :262249-263203   | q1 | q2 | OK       | 374.626  | 41.3615 | -3.17909     | 2.45501   | 0.014088 | 0.500083 |
| gene2150 | gene2150 | SACOL_tRNA | gi 57650036 ref NC_002951.2 :2228142-2228226 | q1 | q2 | NOTEST 0 |          | 0       | 0            | 0         | 1        | 1        |
| gene2151 | gene2151 | SACOL_tRNA | gi 57650036 ref NC_002951.2 :2228255-2228331 | q1 | q2 | NOTEST 0 |          | 0       | 0            | 0         | 1        | 1        |
| gene2152 | gene2152 | SACOL_tRNA | gi 57650036 ref NC_002951.2 :2228338-2228410 | q1 | q2 | NOTEST 0 |          | 0       | 0            | 0         | 1        | 1        |
| gene2153 | gene2153 | SACOL_tRNA | gi 57650036 ref NC_002951.2 :2228411-2228486 | q1 | q2 | NOTEST 0 |          | 0       | 0            | 0         | 1        | 1        |
| gene2154 | gene2154 | rffF       | gi 57650036 ref NC_002951.2 :2228496-2228611 | q1 | q2 | OK       | 240382   | 221072  | -0.120815    | 0.114489  | 0.90885  | 0.984151 |
| gene2155 | gene2155 | rrfF       | gi 57650036 ref NC_002951.2 :2228683-2231606 | q1 | q2 | OK       | 43134.5  | 22925   | -0.911919    | 1.34668   | 0.178084 | 0.842707 |
| gene2156 | gene2156 | rrsF       | gi 57650036 ref NC_002951.2 :2232152-2233707 | q1 | q2 | OK       | 13294.5  | 6685.64 | -0.991694    | 0.780934  | 0.434841 | 0.956269 |
| gene2157 | gene2157 | SACOL2156  | gi 57650036 ref NC_002951.2 :2234162-2235227 | q1 | q2 | OK       | 368.108  | 227.126 | -0.696636    | 0.626365  | 0.531075 | 0.963286 |
| gene2158 | gene2158 | SACOL2157  | gi 57650036 ref NC_002951.2 :2235374-2236817 | q1 | q2 | OK       | 88.6369  | 67.2236 | -0.398939    | 0.392995  | 0.694323 | 0.978191 |
| gene2159 | gene2159 | SACOL2158  | gi 57650036 ref NC_002951.2 :2237138-2237612 | q1 | q2 | OK       | 252.185  | 69.2578 | -1.86443     | 1.3506    | 0.176824 | 0.842707 |
| gene216  | gene216  | SACOL0223  | gi 57650036 ref NC_002951.2 :263370-263496   | q1 | q2 | OK       | 0        | 71.7868 | 1.79769e+308 | 1.79769e+ | 0.207933 | 0.842707 |
| gene2160 | gene2160 | SACOL2159  | gi 57650036 ref NC_002951.2 :2237710-2239054 | q1 | q2 | OK       | 49.1877  | 36.4771 | -0.431307    | 0.354979  | 0.722605 | 0.978191 |
| gene2161 | gene2161 | SACOL2160  | gi 57650036 ref NC_002951.2 :2239230-2239914 | q1 | q2 | OK       | 212.026  | 120.32  | -0.81736     | 0.771944  | 0.440148 | 0.956269 |
| gene2162 | gene2162 | SACOL2161  | gi 57650036 ref NC_002951.2 :2239932-2241120 | q1 | q2 | OK       | 225.255  | 167.814 | -0.424697    | 0.400626  | 0.688696 | 0.978191 |
| gene2163 | gene2163 | SACOL2162  | gi 57650036 ref NC_002951.2 :2241163-2241679 | q1 | q2 | OK       | 140.932  | 58.9469 | -1.25751     | 0.853438  | 0.393417 | 0.940909 |
| gene2164 | gene2164 | SACOL2163  | gi 57650036 ref NC_002951.2 :2241856-2242117 | q1 | q2 | OK       | 3481.42  | 941.418 | -1.88677     | 1.78416   | 0.074398 | 0.754145 |

|          |          |           |                                              |    |    |    |          |         |             |           |          |          |
|----------|----------|-----------|----------------------------------------------|----|----|----|----------|---------|-------------|-----------|----------|----------|
| gene2165 | gene2165 | SACOL2164 | gi 57650036 ref NC_002951.2 :2242248-2243619 | q1 | q2 | OK | 17.3132  | 43.7381 | 1.33701     | -0.94338  | 0.345487 | 0.93284  |
| gene2166 | gene2166 | SACOL2165 | gi 57650036 ref NC_002951.2 :2243854-2245851 | q1 | q2 | OK | 9.45657  | 26.4662 | 1.48476     | -0.70618  | 0.480077 | 0.957466 |
| gene2167 | gene2167 | SACOL2166 | gi 57650036 ref NC_002951.2 :2243854-2245851 | q1 | q2 | OK | 6.34154  | 34.4535 | 2.44175     | -1.09789  | 0.272254 | 0.906044 |
| gene2168 | gene2168 | SACOL2167 | gi 57650036 ref NC_002951.2 :2245862-2246846 | q1 | q2 | OK | 21.0683  | 27.6846 | 0.394011    | -0.23994  | 0.810377 | 0.984151 |
| gene2169 | gene2169 | SACOL2168 | gi 57650036 ref NC_002951.2 :2247237-2248308 | q1 | q2 | OK | 21.4259  | 39.9572 | 0.899097    | -0.58916  | 0.555752 | 0.976548 |
| gene217  | gene217  | SACOL0224 | gi 57650036 ref NC_002951.2 :263522-265052   | q1 | q2 | OK | 5.2322   | 56.2966 | 3.42756     | -2.21413  | 0.02682  | 0.604847 |
| gene2170 | gene2170 | SACOL2169 | gi 57650036 ref NC_002951.2 :2248314-2251252 | q1 | q2 | OK | 16.0092  | 51.8371 | 1.69508     | -1.15007  | 0.250114 | 0.889805 |
| gene2171 | gene2171 | SACOL2170 | gi 57650036 ref NC_002951.2 :2248314-2251252 | q1 | q2 | OK | 4.84263  | 53.5865 | 3.46801     | -1.21492  | 0.224398 | 0.854232 |
| gene2172 | gene2172 | SACOL2171 | gi 57650036 ref NC_002951.2 :2251353-2253330 | q1 | q2 | OK | 18.7608  | 32.6167 | 0.797894    | -0.62277  | 0.533434 | 0.963286 |
| gene2173 | gene2173 | SACOL2172 | gi 57650036 ref NC_002951.2 :2253785-2255410 | q1 | q2 | OK | 0.762111 | 22.4857 | 4.88286     | -2.542    | 0.011022 | 0.500083 |
| gene2174 | gene2174 | SACOL2173 | gi 57650036 ref NC_002951.2 :2255445-2255955 | q1 | q2 | OK | 9590.38  | 4933.54 | -0.958965   | 0.693329  | 0.488103 | 0.963286 |
| gene2175 | gene2175 | SACOL2174 | gi 57650036 ref NC_002951.2 :2256017-2256257 | q1 | q2 | OK | 1910.54  | 4340.91 | 1.18402     | -1.10875  | 0.267538 | 0.902533 |
| gene2176 | gene2176 | SACOL2175 | gi 57650036 ref NC_002951.2 :2256269-2256818 | q1 | q2 | OK | 2220.37  | 2013.98 | -0.140754   | 0.106677  | 0.915045 | 0.984151 |
| gene2177 | gene2177 | opuD2     | gi 57650036 ref NC_002951.2 :2256980-2258543 | q1 | q2 | OK | 551.155  | 505.348 | -0.125181   | 0.095044  | 0.92428  | 0.986264 |
| gene2178 | gene2178 | SACOL2177 | gi 57650036 ref NC_002951.2 :2258849-2259851 | q1 | q2 | OK | 55.7061  | 76.5874 | 0.459273    | -0.38818  | 0.697885 | 0.978191 |
| gene2179 | gene2179 | SACOL2178 | gi 57650036 ref NC_002951.2 :2260084-2261086 | q1 | q2 | OK | 351.525  | 266.38  | -0.400141   | 0.362188  | 0.717212 | 0.978191 |
| gene218  | gene218  | SACOL0225 | gi 57650036 ref NC_002951.2 :265413-266349   | q1 | q2 | OK | 29.0842  | 101.948 | 1.80953     | -1.33504  | 0.181864 | 0.842707 |
| gene2180 | gene2180 | SACOL2179 | gi 57650036 ref NC_002951.2 :2261368-2262238 | q1 | q2 | OK | 113.014  | 188.124 | 0.73518     | -0.71322  | 0.47571  | 0.956269 |
| gene2181 | gene2181 | lacG      | gi 57650036 ref NC_002951.2 :2262503-2263916 | q1 | q2 | OK | 13.4693  | 25.4157 | 0.916049    | -0.58062  | 0.561494 | 0.976548 |
| gene2182 | gene2182 | lacE      | gi 57650036 ref NC_002951.2 :2263933-2265963 | q1 | q2 | OK | 5.85648  | 33.7621 | 2.5273      | -1.35605  | 0.175085 | 0.842707 |
| gene2183 | gene2183 | lacF      | gi 57650036 ref NC_002951.2 :2263933-2265963 | q1 | q2 | OK | 4.37768  | 53.0106 | 3.59804     | -0.55391  | 0.579638 | 0.976548 |
| gene2184 | gene2184 | lacD      | gi 57650036 ref NC_002951.2 :2265984-2266965 | q1 | q2 | OK | 7.61461  | 27.3916 | 1.84689     | -1.0312   | 0.302445 | 0.927424 |
| gene2185 | gene2185 | lacC      | gi 57650036 ref NC_002951.2 :2266968-2267901 | q1 | q2 | OK | 6.92542  | 59.2733 | 3.09741     | -1.85158  | 0.064086 | 0.722927 |
| gene2186 | gene2186 | lacB      | gi 57650036 ref NC_002951.2 :2267913-2268429 | q1 | q2 | OK | 8.76262  | 27.255  | 1.63709     | -0.81718  | 0.413827 | 0.944754 |
| gene2187 | gene2187 | SACOL2186 | gi 57650036 ref NC_002951.2 :2268444-2268873 | q1 | q2 | OK | 6.21407  | 23.5863 | 1.92434     | -0.90581  | 0.365036 | 0.93284  |
| gene2188 | gene2188 | SACOL2187 | gi 57650036 ref NC_002951.2 :2268887-2269004 | q1 | q2 | OK | 0        | 154.533 | 1.79769e+30 | 1.79769e+ | 0.207933 | 0.842707 |
| gene2189 | gene2189 | lacR      | gi 57650036 ref NC_002951.2 :2269240-2269996 | q1 | q2 | OK | 39.3184  | 51.2233 | 0.381595    | -0.24675  | 0.805103 | 0.984151 |
| gene219  | gene219  | SACOL0228 | gi 57650036 ref NC_002951.2 :266687-269236   | q1 | q2 | OK | 2.50843  | 27.9233 | 3.47661     | -2.0285   | 0.042509 | 0.649031 |
| gene2190 | gene2190 | SACOL2189 | gi 57650036 ref NC_002951.2 :2270246-2270978 | q1 | q2 | OK | 44.9559  | 55.7689 | 0.310951    | -0.20439  | 0.838047 | 0.984151 |
| gene2191 | gene2191 | SACOL2190 | gi 57650036 ref NC_002951.2 :2271268-2271877 | q1 | q2 | OK | 6.09655  | 24.7787 | 2.02304     | -1.01472  | 0.310238 | 0.927653 |
| gene2192 | gene2192 | SACOL2191 | gi 57650036 ref NC_002951.2 :2272138-2272264 | q1 | q2 | OK | 0        | 71.7868 | 1.79769e+30 | 1.79769e+ | 0.207933 | 0.842707 |
| gene2193 | gene2193 | SACOL2192 | gi 57650036 ref NC_002951.2 :2272483-2273332 | q1 | q2 | OK | 303.294  | 134.918 | -1.16864    | 1.12786   | 0.259379 | 0.898005 |
| gene2194 | gene2194 | SACOL2193 | gi 57650036 ref NC_002951.2 :2273401-2273818 | q1 | q2 | OK | 17.5735  | 45.9811 | 1.38764     | -0.71125  | 0.476932 | 0.956269 |



|          |          |           |                                              |    |    |          |         |         |           |          |          |          |
|----------|----------|-----------|----------------------------------------------|----|----|----------|---------|---------|-----------|----------|----------|----------|
| gene2195 | gene2195 | hysA      | gi 57650036 ref NC_002951.2 :2274225-2276649 | q1 | q2 | OK       | 3.88302 | 29.0812 | 2.90484   | -1.90353 | 0.056971 | 0.696046 |
| gene2196 | gene2196 | SACOL2195 | gi 57650036 ref NC_002951.2 :2276708-2277563 | q1 | q2 | OK       | 41.2728 | 95.0608 | 1.20366   | -0.90798 | 0.363889 | 0.93284  |
| gene2197 | gene2197 | SACOL2196 | gi 57650036 ref NC_002951.2 :2277773-2278589 | q1 | q2 | OK       | 29.2064 | 36.3626 | 0.316168  | -0.19473 | 0.845607 | 0.984151 |
| gene2198 | gene2198 | SACOL2197 | gi 57650036 ref NC_002951.2 :2278882-2279308 | q1 | q2 | OK       | 390.856 | 358.155 | -0.126052 | 0.122999 | 0.902108 | 0.984151 |
| gene2199 | gene2199 | budA1     | gi 57650036 ref NC_002951.2 :2279671-2280376 | q1 | q2 | OK       | 2.21856 | 37.0112 | 4.06026   | -2.03043 | 0.042313 | 0.649031 |
| gene22   | gene22   | yycH      | gi 57650036 ref NC_002951.2 :25665-28819     | q1 | q2 | OK       | 171.245 | 96.6263 | -0.825573 | 0.408679 | 0.682775 | 0.978191 |
| gene220  | gene220  | SACOL0229 | gi 57650036 ref NC_002951.2 :266687-269236   | q1 | q2 | OK       | 2.61809 | 29.9887 | 3.51783   | -0.77053 | 0.440989 | 0.956269 |
| gene2200 | gene2200 | budB      | gi 57650036 ref NC_002951.2 :2280412-2282077 | q1 | q2 | OK       | 8.59516 | 40.6934 | 2.2432    | -1.52147 | 0.128141 | 0.842707 |
| gene2201 | gene2201 | SACOL2200 | gi 57650036 ref NC_002951.2 :2282356-2282452 | q1 | q2 | NOTEST 0 |         | 0       | 0         | 0        | 1        | 1        |
| gene2202 | gene2202 | SACOL2201 | gi 57650036 ref NC_002951.2 :2283266-2283866 | q1 | q2 | OK       | 21.5642 | 30.3757 | 0.494278  | -0.27107 | 0.786341 | 0.982219 |
| gene2203 | gene2203 | SACOL2202 | gi 57650036 ref NC_002951.2 :2283898-2284672 | q1 | q2 | OK       | 17.0759 | 23.9388 | 0.487394  | -0.27255 | 0.7852   | 0.982219 |
| gene2204 | gene2204 | SACOL2203 | gi 57650036 ref NC_002951.2 :2284800-2285937 | q1 | q2 | OK       | 24.321  | 38.4115 | 0.659335  | -0.44505 | 0.656288 | 0.978191 |
| gene2205 | gene2205 | SACOL2204 | gi 57650036 ref NC_002951.2 :2285937-2286729 | q1 | q2 | OK       | 33.0702 | 55.9987 | 0.759861  | -0.4966  | 0.619471 | 0.978191 |
| gene2206 | gene2206 | SACOL2205 | gi 57650036 ref NC_002951.2 :2286768-2288129 | q1 | q2 | OK       | 8.82663 | 29.8544 | 1.75801   | -1.08317 | 0.278734 | 0.914891 |
| gene2207 | gene2207 | rpsI      | gi 57650036 ref NC_002951.2 :2288673-2289072 | q1 | q2 | OK       | 1206.1  | 96.1911 | -3.6483   | 2.66329  | 0.007738 | 0.480028 |
| gene2208 | gene2208 | rplM      | gi 57650036 ref NC_002951.2 :2289085-2289523 | q1 | q2 | OK       | 247.268 | 80.2634 | -1.62326  | 1.15399  | 0.248504 | 0.889805 |
| gene2209 | gene2209 | truA      | gi 57650036 ref NC_002951.2 :2289762-2290566 | q1 | q2 | OK       | 33.8586 | 46.9262 | 0.47087   | -0.30204 | 0.762624 | 0.978191 |
| gene221  | gene221  | SACOL0230 | gi 57650036 ref NC_002951.2 :269258-269537   | q1 | q2 | OK       | 2.9413  | 76.3171 | 4.69748   | -2.11402 | 0.034513 | 0.621406 |
| gene2210 | gene2210 | SACOL2209 | gi 57650036 ref NC_002951.2 :2290570-2293033 | q1 | q2 | OK       | 61.877  | 33.3335 | -0.892431 | 0.44503  | 0.656298 | 0.978191 |
| gene2211 | gene2211 | cbiO      | gi 57650036 ref NC_002951.2 :2290570-2293033 | q1 | q2 | OK       | 46.2462 | 56.2205 | 0.281763  | -0.16057 | 0.872431 | 0.984151 |
| gene2212 | gene2212 | cbiO      | gi 57650036 ref NC_002951.2 :2290570-2293033 | q1 | q2 | OK       | 44.0758 | 83.3561 | 0.919302  | -0.53967 | 0.589423 | 0.978191 |
| gene2213 | gene2213 | rplQ      | gi 57650036 ref NC_002951.2 :2293570-2293939 | q1 | q2 | OK       | 343.075 | 150.203 | -1.19161  | 0.881745 | 0.377915 | 0.940261 |
| gene2214 | gene2214 | rpoA      | gi 57650036 ref NC_002951.2 :2293955-2294900 | q1 | q2 | OK       | 483.229 | 178.208 | -1.43914  | 1.30267  | 0.192689 | 0.842707 |
| gene2215 | gene2215 | rpsK      | gi 57650036 ref NC_002951.2 :2294974-2295364 | q1 | q2 | OK       | 495.228 | 139.591 | -1.82689  | 1.43046  | 0.152585 | 0.842707 |
| gene2216 | gene2216 | rpsM      | gi 57650036 ref NC_002951.2 :2295387-2295753 | q1 | q2 | OK       | 349.734 | 221.209 | -0.660848 | 0.530086 | 0.596052 | 0.978191 |
| gene2217 | gene2217 | rpmJ      | gi 57650036 ref NC_002951.2 :2295775-2295889 | q1 | q2 | OK       | 2871.4  | 865.044 | -1.73091  | 0.715259 | 0.474449 | 0.956269 |
| gene2218 | gene2218 | infA      | gi 57650036 ref NC_002951.2 :2295920-2296139 | q1 | q2 | OK       | 499.043 | 213.629 | -1.22405  | 0.691031 | 0.489546 | 0.963286 |
| gene2219 | gene2219 | adk       | gi 57650036 ref NC_002951.2 :2296331-2296979 | q1 | q2 | OK       | 349.798 | 120.321 | -1.53963  | 1.42222  | 0.154962 | 0.842707 |
| gene222  | gene222  | SACOL0231 | gi 57650036 ref NC_002951.2 :269601-269736   | q1 | q2 | NOTEST 0 |         | 0       | 0         | 0        | 1        | 1        |
| gene2220 | gene2220 | secY      | gi 57650036 ref NC_002951.2 :2296995-2298728 | q1 | q2 | OK       | 669.336 | 168.594 | -1.98917  | 1.36969  | 0.170783 | 0.842707 |
| gene2221 | gene2221 | rplO      | gi 57650036 ref NC_002951.2 :2296995-2298728 | q1 | q2 | OK       | 865.948 | 363.943 | -1.25057  | 0.50006  | 0.617033 | 0.978191 |
| gene2222 | gene2222 | rpmD      | gi 57650036 ref NC_002951.2 :2298744-2298924 | q1 | q2 | OK       | 1530.63 | 162.18  | -3.23846  | 1.71086  | 0.087107 | 0.771794 |
| gene2223 | gene2223 | rpsE      | gi 57650036 ref NC_002951.2 :2298940-2299441 | q1 | q2 | OK       | 423.252 | 139.71  | -1.59909  | 1.40412  | 0.160285 | 0.842707 |

|          |          |           |                                              |    |    |          |         |         |              |              |          |          |
|----------|----------|-----------|----------------------------------------------|----|----|----------|---------|---------|--------------|--------------|----------|----------|
| gene2224 | gene2224 | rplR      | gi 57650036 ref NC_002951.2 :2299461-2299821 | q1 | q2 | OK       | 1007.21 | 245.948 | -2.03394     | 1.7689       | 0.07691  | 0.758524 |
| gene2225 | gene2225 | rplF      | gi 57650036 ref NC_002951.2 :2299851-2300388 | q1 | q2 | OK       | 652.796 | 112.994 | -2.53039     | 2.11157      | 0.034723 | 0.621406 |
| gene2226 | gene2226 | rpsH      | gi 57650036 ref NC_002951.2 :2300412-2300811 | q1 | q2 | OK       | 383.923 | 99.609  | -1.94647     | 1.43292      | 0.151881 | 0.842707 |
| gene2227 | gene2227 | rpsN      | gi 57650036 ref NC_002951.2 :2300842-2301028 | q1 | q2 | OK       | 155.205 | 74.3244 | -1.06227     | 0.482591     | 0.629386 | 0.978191 |
| gene2228 | gene2228 | rplE      | gi 57650036 ref NC_002951.2 :2301050-2301590 | q1 | q2 | OK       | 407.681 | 100.22  | -2.02427     | 1.67173      | 0.094578 | 0.794532 |
| gene2229 | gene2229 | rplX      | gi 57650036 ref NC_002951.2 :2301616-2301934 | q1 | q2 | OK       | 408.293 | 253.365 | -0.688383    | 0.51085      | 0.609456 | 0.978191 |
| gene223  | gene223  | SACOL0232 | gi 57650036 ref NC_002951.2 :269763-271023   | q1 | q2 | OK       | 3.50374 | 35.1047 | 3.3247       | -1.90191     | 0.057183 | 0.696046 |
| gene2230 | gene2230 | rplN      | gi 57650036 ref NC_002951.2 :2301969-2302338 | q1 | q2 | OK       | 501.64  | 120.729 | -2.05488     | 1.53238      | 0.12543  | 0.842707 |
| gene2231 | gene2231 | rpsQ      | gi 57650036 ref NC_002951.2 :2302369-2302633 | q1 | q2 | OK       | 576.766 | 238.679 | -1.27291     | 0.843279     | 0.399073 | 0.940909 |
| gene2232 | gene2232 | rpmC      | gi 57650036 ref NC_002951.2 :2302656-2303290 | q1 | q2 | OK       | 461.322 | 113.813 | -2.01911     | 0.491547     | 0.62304  | 0.978191 |
| gene2233 | gene2233 | rplP      | gi 57650036 ref NC_002951.2 :2302656-2303290 | q1 | q2 | OK       | 825.636 | 159.923 | -2.36813     | 1.94966      | 0.051216 | 0.6872   |
| gene2234 | gene2234 | rpsC      | gi 57650036 ref NC_002951.2 :2303292-2303946 | q1 | q2 | OK       | 570.733 | 116.1   | -2.29745     | 2.0406       | 0.04129  | 0.643773 |
| gene2235 | gene2235 | rplV      | gi 57650036 ref NC_002951.2 :2303969-2304323 | q1 | q2 | OK       | 377.19  | 128.194 | -1.55696     | 1.10953      | 0.267203 | 0.902533 |
| gene2236 | gene2236 | rpsS      | gi 57650036 ref NC_002951.2 :2304351-2304630 | q1 | q2 | OK       | 502.962 | 162.446 | -1.63048     | 1.05693      | 0.290542 | 0.923259 |
| gene2237 | gene2237 | rplB      | gi 57650036 ref NC_002951.2 :2304696-2305530 | q1 | q2 | OK       | 605.047 | 111.588 | -2.43887     | 2.16646      | 0.030276 | 0.604847 |
| gene2238 | gene2238 | rplW      | gi 57650036 ref NC_002951.2 :2305562-2306461 | q1 | q2 | OK       | 245.387 | 170.894 | -0.521963    | 0.168879     | 0.865892 | 0.984151 |
| gene2239 | gene2239 | rplD      | gi 57650036 ref NC_002951.2 :2305562-2306461 | q1 | q2 | OK       | 464.654 | 164.444 | -1.49856     | 1.31184      | 0.189573 | 0.842707 |
| gene224  | gene224  | gutB      | gi 57650036 ref NC_002951.2 :271040-272096   | q1 | q2 | OK       | 5.13225 | 37.9823 | 2.88767      | -1.64391     | 0.100196 | 0.815096 |
| gene2240 | gene2240 | rplC      | gi 57650036 ref NC_002951.2 :2306487-2307150 | q1 | q2 | OK       | 409.803 | 128.88  | -1.66891     | 1.55658      | 0.119571 | 0.842061 |
| gene2241 | gene2241 | rpsJ      | gi 57650036 ref NC_002951.2 :2307177-2307486 | q1 | q2 | OK       | 316.519 | 212.87  | -0.572319    | 0.383168     | 0.701596 | 0.978191 |
| gene2242 | gene2242 | SACOL2241 | gi 57650036 ref NC_002951.2 :2307842-2308232 | q1 | q2 | OK       | 407.61  | 425.906 | 0.0633427    | -0.0609      | 0.95144  | 0.988316 |
| gene2243 | gene2243 | SACOL2242 | gi 57650036 ref NC_002951.2 :2308423-2309758 | q1 | q2 | OK       | 168.938 | 49.0465 | -1.78427     | 1.63085      | 0.102921 | 0.816291 |
| gene2244 | gene2244 | topB      | gi 57650036 ref NC_002951.2 :2309870-2312006 | q1 | q2 | OK       | 76.3991 | 60.4102 | -0.338762    | 0.333041     | 0.739103 | 0.978191 |
| gene2245 | gene2245 | SACOL2245 | gi 57650036 ref NC_002951.2 :2312192-2313080 | q1 | q2 | OK       | 45.9743 | 48.0775 | 0.0645329    | -0.0449      | 0.964184 | 0.989588 |
| gene2246 | gene2246 | SACOL2246 | gi 57650036 ref NC_002951.2 :2313260-2314124 | q1 | q2 | OK       | 91.0584 | 73.6487 | -0.306133    | 0.265156     | 0.790889 | 0.982405 |
| gene2247 | gene2247 | SACOL2247 | gi 57650036 ref NC_002951.2 :2314240-2314372 | q1 | q2 | OK       | 308.285 | 0       | -1.79769e+30 | -1.79769e+30 | 0.201826 | 0.842707 |
| gene2248 | gene2248 | SACOL2248 | gi 57650036 ref NC_002951.2 :2314542-2315451 | q1 | q2 | OK       | 28.36   | 46.2511 | 0.705631     | -0.46173     | 0.644273 | 0.978191 |
| gene2249 | gene2249 | SACOL2250 | gi 57650036 ref NC_002951.2 :2315583-2315748 | q1 | q2 | OK       | 202.09  | 32.7922 | -2.62357     | 1.10284      | 0.270098 | 0.905515 |
| gene225  | gene225  | SACOL0234 | gi 57650036 ref NC_002951.2 :272097-272244   | q1 | q2 | NOTEST 0 |         | 0       | 0            | 0            | 1        | 1        |
| gene2250 | gene2250 | SACOL2251 | gi 57650036 ref NC_002951.2 :2315992-2316310 | q1 | q2 | OK       | 112.489 | 113.04  | 0.0070522    | -0.00403     | 0.996781 | 0.998672 |
| gene2251 | gene2251 | SACOL2252 | gi 57650036 ref NC_002951.2 :2316496-2319664 | q1 | q2 | OK       | 113.825 | 61.6438 | -0.884788    | 0.79316      | 0.427684 | 0.954536 |
| gene2252 | gene2252 | femX      | gi 57650036 ref NC_002951.2 :2319780-2321046 | q1 | q2 | OK       | 119.671 | 53.7306 | -1.15525     | 1.08241      | 0.27907  | 0.914891 |
| gene2253 | gene2253 | SACOL2255 | gi 57650036 ref NC_002951.2 :2321677-2322442 | q1 | q2 | OK       | 16.5706 | 52.2458 | 1.65668      | -0.99038     | 0.321987 | 0.927653 |

|          |          |           |                                              |    |    |    |         |         |             |           |          |          |
|----------|----------|-----------|----------------------------------------------|----|----|----|---------|---------|-------------|-----------|----------|----------|
| gene2254 | gene2254 | SACOL2256 | gi 57650036 ref NC_002951.2 :2322603-2324248 | q1 | q2 | OK | 4.8979  | 25.3533 | 2.37194     | -0.69053  | 0.48986  | 0.963286 |
| gene2255 | gene2255 | SACOL2257 | gi 57650036 ref NC_002951.2 :2322603-2324248 | q1 | q2 | OK | 2.16111 | 28.0181 | 3.69651     | -1.74606  | 0.0808   | 0.761588 |
| gene2256 | gene2256 | sarV      | gi 57650036 ref NC_002951.2 :2324349-2324700 | q1 | q2 | OK | 6.4991  | 29.4817 | 2.18151     | -1.00077  | 0.316938 | 0.927653 |
| gene2257 | gene2257 | SACOL2259 | gi 57650036 ref NC_002951.2 :2324825-2324996 | q1 | q2 | OK | 0       | 8.91167 | 1.79769e+30 | 1.79769e+ | 0.207933 | 0.842707 |
| gene2258 | gene2258 | SACOL2260 | gi 57650036 ref NC_002951.2 :2325052-2325196 | q1 | q2 | OK | 0       | 25.4355 | 1.79769e+30 | 1.79769e+ | 0.207933 | 0.842707 |
| gene2259 | gene2259 | moaA      | gi 57650036 ref NC_002951.2 :2325390-2326413 | q1 | q2 | OK | 109.02  | 89.7591 | -0.280461   | 0.272421  | 0.785298 | 0.982219 |
| gene226  | gene226  | SACOL0235 | gi 57650036 ref NC_002951.2 :272267-273311   | q1 | q2 | OK | 5.46768 | 67.7017 | 3.63019     | -2.21815  | 0.026545 | 0.604847 |
| gene2260 | gene2260 | mobA      | gi 57650036 ref NC_002951.2 :2326432-2327032 | q1 | q2 | OK | 61.2878 | 53.9169 | -0.184863   | 0.117051  | 0.906819 | 0.984151 |
| gene2261 | gene2261 | moaD      | gi 57650036 ref NC_002951.2 :2327038-2327272 | q1 | q2 | OK | 74.9098 | 40.785  | -0.877115   | 0.410948  | 0.68111  | 0.978191 |
| gene2262 | gene2262 | moaE      | gi 57650036 ref NC_002951.2 :2327277-2327724 | q1 | q2 | OK | 61.036  | 83.925  | 0.45944     | -0.27575  | 0.782743 | 0.982219 |
| gene2263 | gene2263 | mobB      | gi 57650036 ref NC_002951.2 :2327737-2329479 | q1 | q2 | OK | 53.678  | 198.161 | 1.88427     | -0.95028  | 0.34197  | 0.93284  |
| gene2264 | gene2264 | SACOL2266 | gi 57650036 ref NC_002951.2 :2327737-2329479 | q1 | q2 | OK | 53.3805 | 70.2094 | 0.395353    | -0.30932  | 0.757075 | 0.978191 |
| gene2265 | gene2265 | moaC      | gi 57650036 ref NC_002951.2 :2329541-2330036 | q1 | q2 | OK | 169.094 | 74.7481 | -1.17772    | 0.833154  | 0.404758 | 0.940909 |
| gene2266 | gene2266 | moaB      | gi 57650036 ref NC_002951.2 :2330037-2330544 | q1 | q2 | OK | 58.7593 | 66.1197 | 0.170264    | -0.10371  | 0.917401 | 0.984151 |
| gene2267 | gene2267 | SACOL2269 | gi 57650036 ref NC_002951.2 :2330574-2331579 | q1 | q2 | OK | 48.3848 | 63.59   | 0.394246    | -0.31246  | 0.754691 | 0.978191 |
| gene2268 | gene2268 | modC      | gi 57650036 ref NC_002951.2 :2331748-2332354 | q1 | q2 | OK | 93.8412 | 50.9068 | -0.882362   | 0.591093  | 0.554458 | 0.976548 |
| gene2269 | gene2269 | modB      | gi 57650036 ref NC_002951.2 :2332354-2333026 | q1 | q2 | OK | 62.8805 | 50.0856 | -0.328218   | 0.215097  | 0.829692 | 0.984151 |
| gene227  | gene227  | ispD      | gi 57650036 ref NC_002951.2 :273838-275573   | q1 | q2 | OK | 71.432  | 78.2912 | 0.132279    | -0.07749  | 0.938233 | 0.987716 |
| gene2270 | gene2270 | modA      | gi 57650036 ref NC_002951.2 :2333039-2333822 | q1 | q2 | OK | 152.356 | 118.252 | -0.365584   | 0.35239   | 0.724546 | 0.978191 |
| gene2271 | gene2271 | fdhD      | gi 57650036 ref NC_002951.2 :2334111-2334909 | q1 | q2 | OK | 292.664 | 146.787 | -0.995524   | 0.96875   | 0.33267  | 0.927653 |
| gene2272 | gene2272 | SACOL2274 | gi 57650036 ref NC_002951.2 :2335080-2335851 | q1 | q2 | OK | 12.8771 | 22.9835 | 0.835795    | -0.45588  | 0.648477 | 0.978191 |
| gene2273 | gene2273 | SACOL2275 | gi 57650036 ref NC_002951.2 :2335922-2336477 | q1 | q2 | OK | 10.3115 | 125.69  | 3.60754     | -2.10927  | 0.034922 | 0.621406 |
| gene2274 | gene2274 | SACOL2276 | gi 57650036 ref NC_002951.2 :2336597-2337539 | q1 | q2 | OK | 9.81198 | 38.9544 | 1.98917     | -1.16118  | 0.24557  | 0.885853 |
| gene2275 | gene2275 | SACOL2277 | gi 57650036 ref NC_002951.2 :2337937-2338846 | q1 | q2 | OK | 124.348 | 81.0122 | -0.618169   | 0.578187  | 0.563138 | 0.976548 |
| gene2276 | gene2276 | SACOL2278 | gi 57650036 ref NC_002951.2 :2339059-2340214 | q1 | q2 | OK | 306.394 | 120.163 | -1.35039    | 1.25522   | 0.2094   | 0.842707 |
| gene2277 | gene2277 | SACOL2279 | gi 57650036 ref NC_002951.2 :2340430-2341336 | q1 | q2 | OK | 10.3296 | 41.0392 | 1.99022     | -1.16225  | 0.245133 | 0.885853 |
| gene2278 | gene2278 | ureA      | gi 57650036 ref NC_002951.2 :2341595-2341898 | q1 | q2 | OK | 4.7268  | 74.465  | 3.97763     | -1.83314  | 0.066781 | 0.73141  |
| gene2279 | gene2279 | ureB      | gi 57650036 ref NC_002951.2 :2341911-2344034 | q1 | q2 | OK | 9.05998 | 25.9075 | 1.51579     | -0.3289   | 0.742233 | 0.978191 |
| gene228  | gene228  | SACOL0237 | gi 57650036 ref NC_002951.2 :273838-275573   | q1 | q2 | OK | 82.7902 | 90.943  | 0.135502    | -0.10823  | 0.913815 | 0.984151 |
| gene2280 | gene2280 | ureC      | gi 57650036 ref NC_002951.2 :2341911-2344034 | q1 | q2 | OK | 11.3071 | 39.6154 | 1.80883     | -1.16833  | 0.242672 | 0.883186 |
| gene2281 | gene2281 | ureE      | gi 57650036 ref NC_002951.2 :2344046-2345181 | q1 | q2 | OK | 11.1491 | 26.1818 | 1.23164     | -0.40247  | 0.687339 | 0.978191 |
| gene2282 | gene2282 | ureF      | gi 57650036 ref NC_002951.2 :2344046-2345181 | q1 | q2 | OK | 11.9076 | 25.8201 | 1.11662     | -0.48239  | 0.629527 | 0.978191 |
| gene2283 | gene2283 | ureG      | gi 57650036 ref NC_002951.2 :2345193-2346644 | q1 | q2 | OK | 16.3721 | 33.7201 | 1.04237     | -0.42627  | 0.669912 | 0.978191 |

|          |          |           |                                              |    |    |    |         |         |             |           |          |          |
|----------|----------|-----------|----------------------------------------------|----|----|----|---------|---------|-------------|-----------|----------|----------|
| gene2284 | gene2284 | ureD      | gi 57650036 ref NC_002951.2 :2345193-2346644 | q1 | q2 | OK | 18.1079 | 21.3111 | 0.234984    | -0.11111  | 0.91153  | 0.984151 |
| gene2285 | gene2285 | sarR      | gi 57650036 ref NC_002951.2 :2346832-2347180 | q1 | q2 | OK | 81.2995 | 117.506 | 0.531417    | -0.30775  | 0.758273 | 0.978191 |
| gene2286 | gene2286 | SACOL2288 | gi 57650036 ref NC_002951.2 :2347607-2347934 | q1 | q2 | OK | 319.905 | 106.754 | -1.58336    | 1.01825   | 0.30856  | 0.927653 |
| gene2287 | gene2287 | sarY      | gi 57650036 ref NC_002951.2 :2347997-2348741 | q1 | q2 | OK | 14.3661 | 31.4286 | 1.12941     | -0.63151  | 0.527705 | 0.963286 |
| gene2288 | gene2288 | SACOL2290 | gi 57650036 ref NC_002951.2 :2348766-2350722 | q1 | q2 | OK | 16.029  | 44.0834 | 1.45955     | -1.13073  | 0.25817  | 0.896403 |
| gene2289 | gene2289 | SACOL2291 | gi 57650036 ref NC_002951.2 :2351331-2352135 | q1 | q2 | OK | 279.702 | 96.7427 | -1.53166    | 1.42927   | 0.152926 | 0.842707 |
| gene229  | gene229  | SACOL0238 | gi 57650036 ref NC_002951.2 :275594-277289   | q1 | q2 | OK | 91.4577 | 45.195  | -1.01694    | 0.977337  | 0.328402 | 0.927653 |
| gene2290 | gene2290 | nhaC      | gi 57650036 ref NC_002951.2 :2352567-2353968 | q1 | q2 | OK | 42.8152 | 55.9276 | 0.385438    | -0.34196  | 0.732385 | 0.978191 |
| gene2291 | gene2291 | SACOL2293 | gi 57650036 ref NC_002951.2 :2354062-2355145 | q1 | q2 | OK | 41.7564 | 54.6782 | 0.388968    | -0.30106  | 0.763367 | 0.978191 |
| gene2292 | gene2292 | SACOL2294 | gi 57650036 ref NC_002951.2 :2355392-2355815 | q1 | q2 | OK | 179.109 | 32.5263 | -2.46116    | 1.48632   | 0.137193 | 0.842707 |
| gene2293 | gene2293 | SACOL2295 | gi 57650036 ref NC_002951.2 :2356051-2356552 | q1 | q2 | OK | 1748.42 | 713.813 | -1.29243    | 1.10035   | 0.271179 | 0.906044 |
| gene2294 | gene2294 | SACOL2296 | gi 57650036 ref NC_002951.2 :2356913-2357867 | q1 | q2 | OK | 338.947 | 117.237 | -1.53164    | 1.44256   | 0.149145 | 0.842707 |
| gene2295 | gene2295 | SACOL2297 | gi 57650036 ref NC_002951.2 :2357958-2359083 | q1 | q2 | OK | 40.5218 | 64.2365 | 0.664698    | -0.53468  | 0.592874 | 0.978191 |
| gene2296 | gene2296 | SACOL2298 | gi 57650036 ref NC_002951.2 :2359393-2360170 | q1 | q2 | OK | 49.7919 | 37.149  | -0.422591   | 0.272703  | 0.785082 | 0.982219 |
| gene2297 | gene2297 | SACOL2299 | gi 57650036 ref NC_002951.2 :2360191-2360443 | q1 | q2 | OK | 70.9214 | 50.6553 | -0.485507   | 0.234872  | 0.814308 | 0.984151 |
| gene2298 | gene2298 | SACOL2300 | gi 57650036 ref NC_002951.2 :2360652-2364080 | q1 | q2 | OK | 2133.35 | 522.515 | -2.02957    | 0.496959  | 0.619218 | 0.978191 |
| gene2299 | gene2299 | SACOL2301 | gi 57650036 ref NC_002951.2 :2360652-2364080 | q1 | q2 | OK | 690.38  | 648.824 | -0.089563   | 0.059356  | 0.952669 | 0.988316 |
| gene23   | gene23   | yycI      | gi 57650036 ref NC_002951.2 :28819-29608     | q1 | q2 | OK | 168.495 | 83.2812 | -1.01665    | 0.922316  | 0.356364 | 0.93284  |
| gene230  | gene230  | SACOL0239 | gi 57650036 ref NC_002951.2 :277716-278886   | q1 | q2 | OK | 87.1209 | 37.0207 | -1.23469    | 1.0213    | 0.307111 | 0.927653 |
| gene2300 | gene2300 | SACOL2302 | gi 57650036 ref NC_002951.2 :2364681-2365635 | q1 | q2 | OK | 56.15   | 116.963 | 1.05869     | -0.90705  | 0.364379 | 0.93284  |
| gene2301 | gene2301 | SACOL2303 | gi 57650036 ref NC_002951.2 :2365761-2366559 | q1 | q2 | OK | 95.9431 | 77.0844 | -0.315741   | 0.267153  | 0.789352 | 0.982219 |
| gene2302 | gene2302 | SACOL2304 | gi 57650036 ref NC_002951.2 :2366943-2367636 | q1 | q2 | OK | 100.567 | 77.2119 | -0.381266   | 0.299234  | 0.764762 | 0.978191 |
| gene2303 | gene2303 | SACOL2305 | gi 57650036 ref NC_002951.2 :2367991-2369020 | q1 | q2 | OK | 6.40505 | 91.674  | 3.83923     | -0.5265   | 0.598544 | 0.978191 |
| gene2304 | gene2304 | SACOL2306 | gi 57650036 ref NC_002951.2 :2367991-2369020 | q1 | q2 | OK | 56.0584 | 36.7142 | -0.610595   | 0.365775  | 0.714533 | 0.978191 |
| gene2305 | gene2305 | SACOL2307 | gi 57650036 ref NC_002951.2 :2369068-2369398 | q1 | q2 | OK | 0       | 55.8762 | 1.79769e+30 | 1.79769e+ | 0.138827 | 0.842707 |
| gene2306 | gene2306 | SACOL2308 | gi 57650036 ref NC_002951.2 :2369842-2370715 | q1 | q2 | OK | 149.332 | 114.312 | -0.385542   | 0.377454  | 0.705836 | 0.978191 |
| gene2307 | gene2307 | SACOL2309 | gi 57650036 ref NC_002951.2 :2371101-2372481 | q1 | q2 | OK | 504.456 | 101.024 | -2.32004    | 2.00511   | 0.044952 | 0.650761 |
| gene2308 | gene2308 | SACOL2310 | gi 57650036 ref NC_002951.2 :2372760-2373299 | q1 | q2 | OK | 132.55  | 49.6706 | -1.41607    | 0.678868  | 0.497222 | 0.963286 |
| gene2309 | gene2309 | SACOL2311 | gi 57650036 ref NC_002951.2 :2372760-2373299 | q1 | q2 | OK | 827.761 | 102.911 | -3.00782    | 0.884659  | 0.376341 | 0.940261 |
| gene231  | gene231  | ispD      | gi 57650036 ref NC_002951.2 :279161-280896   | q1 | q2 | OK | 99.5719 | 54.3689 | -0.872958   | 0.382074  | 0.702407 | 0.978191 |
| gene2310 | gene2310 | SACOL2312 | gi 57650036 ref NC_002951.2 :2373394-2373586 | q1 | q2 | OK | 66.4085 | 92.7147 | 0.48143     | -0.21586  | 0.829099 | 0.984151 |
| gene2311 | gene2311 | SACOL2313 | gi 57650036 ref NC_002951.2 :2373596-2374232 | q1 | q2 | OK | 35.2206 | 50.3344 | 0.515124    | -0.31176  | 0.755222 | 0.978191 |
| gene2312 | gene2312 | SACOL2314 | gi 57650036 ref NC_002951.2 :2374306-2375224 | q1 | q2 | OK | 15.3805 | 38.9329 | 1.33989     | -0.80782  | 0.419197 | 0.949284 |

|          |          |           |                                              |    |    |          |         |         |            |          |          |          |
|----------|----------|-----------|----------------------------------------------|----|----|----------|---------|---------|------------|----------|----------|----------|
| gene2313 | gene2313 | SACOL2315 | gi 57650036 ref NC_002951.2 :2375491-2376022 | q1 | q2 | OK       | 31.9555 | 15.1636 | -1.07545   | 0.562362 | 0.573869 | 0.976548 |
| gene2314 | gene2314 | SACOL2316 | gi 57650036 ref NC_002951.2 :2376087-2377692 | q1 | q2 | OK       | 31.6989 | 55.5563 | 0.809516   | -0.70178 | 0.482816 | 0.960232 |
| gene2315 | gene2315 | SACOL2317 | gi 57650036 ref NC_002951.2 :2378021-2378786 | q1 | q2 | OK       | 28.0123 | 27.5742 | -0.0227429 | 0.013366 | 0.989336 | 0.997969 |
| gene2316 | gene2316 | SACOL2318 | gi 57650036 ref NC_002951.2 :2378843-2379350 | q1 | q2 | OK       | 197.371 | 202.593 | 0.037678   | -0.03406 | 0.972828 | 0.993959 |
| gene2317 | gene2317 | SACOL2319 | gi 57650036 ref NC_002951.2 :2379516-2380830 | q1 | q2 | OK       | 18.6101 | 49.8636 | 1.4219     | -1.0175  | 0.308916 | 0.927653 |
| gene2318 | gene2318 | SACOL2320 | gi 57650036 ref NC_002951.2 :2381054-2381624 | q1 | q2 | OK       | 38.2288 | 49.3653 | 0.368836   | -0.21762 | 0.827729 | 0.984151 |
| gene2319 | gene2319 | SACOL2321 | gi 57650036 ref NC_002951.2 :2382110-2382992 | q1 | q2 | OK       | 321.509 | 229.459 | -0.486623  | 0.461374 | 0.644531 | 0.978191 |
| gene232  | gene232  | SACOL0241 | gi 57650036 ref NC_002951.2 :279161-280896   | q1 | q2 | OK       | 257.422 | 100.588 | -1.35567   | 1.10168  | 0.270601 | 0.905515 |
| gene2320 | gene2320 | SACOL2322 | gi 57650036 ref NC_002951.2 :2383102-2384224 | q1 | q2 | OK       | 36.6151 | 64.4417 | 0.815554   | -0.63949 | 0.522508 | 0.963286 |
| gene2321 | gene2321 | hutI      | gi 57650036 ref NC_002951.2 :2384500-2387400 | q1 | q2 | OK       | 49.6461 | 55.704  | 0.166103   | -0.1058  | 0.91574  | 0.984151 |
| gene2322 | gene2322 | hutU      | gi 57650036 ref NC_002951.2 :2384500-2387400 | q1 | q2 | OK       | 20.6417 | 78.4811 | 1.92678    | -1.28384 | 0.199197 | 0.842707 |
| gene2323 | gene2323 | SACOL2325 | gi 57650036 ref NC_002951.2 :2387559-2388444 | q1 | q2 | OK       | 65.5603 | 56.4052 | -0.216994  | 0.167489 | 0.866985 | 0.984151 |
| gene2324 | gene2324 | fosB      | gi 57650036 ref NC_002951.2 :2388865-2389285 | q1 | q2 | OK       | 32.4602 | 36.9432 | 0.186639   | -0.09806 | 0.921888 | 0.985958 |
| gene2325 | gene2325 | hutG      | gi 57650036 ref NC_002951.2 :2389540-2390476 | q1 | q2 | OK       | 132.828 | 321.97  | 1.27737    | -1.20745 | 0.22726  | 0.855829 |
| gene2326 | gene2326 | SACOL2328 | gi 57650036 ref NC_002951.2 :2390765-2392025 | q1 | q2 | OK       | 284.009 | 100.902 | -1.49299   | 1.38362  | 0.166475 | 0.842707 |
| gene2327 | gene2327 | rpiA      | gi 57650036 ref NC_002951.2 :2392090-2392777 | q1 | q2 | OK       | 53.9309 | 52.1568 | -0.0482561 | 0.031421 | 0.974933 | 0.995537 |
| gene2328 | gene2328 | SACOL2330 | gi 57650036 ref NC_002951.2 :2392950-2393604 | q1 | q2 | OK       | 80.3989 | 62.7565 | -0.357411  | 0.248334 | 0.803876 | 0.984151 |
| gene2329 | gene2329 | SACOL2331 | gi 57650036 ref NC_002951.2 :2393733-2394859 | q1 | q2 | NOTEST 0 |         | 0       | 0          | 0        | 1        | 1        |
| gene233  | gene233  | SACOL0242 | gi 57650036 ref NC_002951.2 :280917-282606   | q1 | q2 | OK       | 208.007 | 83.807  | -1.31149   | 1.20807  | 0.22702  | 0.855829 |
| gene2330 | gene2330 | galM      | gi 57650036 ref NC_002951.2 :2393733-2394859 | q1 | q2 | OK       | 15.2881 | 35.9566 | 1.23385    | -0.65911 | 0.509825 | 0.963286 |
| gene2331 | gene2331 | SACOL2333 | gi 57650036 ref NC_002951.2 :2394888-2395215 | q1 | q2 | OK       | 11.6329 | 367.788 | 4.98259    | -2.76267 | 0.005733 | 0.446636 |
| gene2332 | gene2332 | SACOL2334 | gi 57650036 ref NC_002951.2 :2395432-2397557 | q1 | q2 | OK       | 56.7128 | 66.3818 | 0.227113   | -0.18097 | 0.856394 | 0.984151 |
| gene2333 | gene2333 | SACOL2335 | gi 57650036 ref NC_002951.2 :2395432-2397557 | q1 | q2 | OK       | 30.6321 | 58.3184 | 0.928905   | -0.50615 | 0.612751 | 0.978191 |
| gene2334 | gene2334 | SACOL2336 | gi 57650036 ref NC_002951.2 :2397626-2397725 | q1 | q2 | NOTEST 0 |         | 0       | 0          | 0        | 1        | 1        |
| gene2335 | gene2335 | SACOL2338 | gi 57650036 ref NC_002951.2 :2397787-2398435 | q1 | q2 | OK       | 45.8008 | 70.3763 | 0.619716   | -0.40385 | 0.686325 | 0.978191 |
| gene2336 | gene2336 | SACOL2339 | gi 57650036 ref NC_002951.2 :2398833-2399442 | q1 | q2 | OK       | 14.41   | 49.0619 | 1.76753    | -0.98058 | 0.326799 | 0.927653 |
| gene2337 | gene2337 | gltS      | gi 57650036 ref NC_002951.2 :2399778-2400987 | q1 | q2 | OK       | 22.3272 | 37.5696 | 0.750763   | -0.51074 | 0.609531 | 0.978191 |
| gene2338 | gene2338 | fni       | gi 57650036 ref NC_002951.2 :2401034-2402084 | q1 | q2 | OK       | 89.4325 | 75.6375 | -0.241696  | 0.228018 | 0.819633 | 0.984151 |
| gene2339 | gene2339 | SACOL2342 | gi 57650036 ref NC_002951.2 :2402114-2403062 | q1 | q2 | OK       | 29.1921 | 35.8884 | 0.297938   | -0.19124 | 0.848337 | 0.984151 |
| gene234  | gene234  | SACOL0243 | gi 57650036 ref NC_002951.2 :282641-284363   | q1 | q2 | OK       | 359.239 | 111.52  | -1.68764   | 1.45039  | 0.146949 | 0.842707 |
| gene2340 | gene2340 | SACOL2343 | gi 57650036 ref NC_002951.2 :2403158-2404066 | q1 | q2 | OK       | 159.841 | 140.359 | -0.187513  | 0.137861 | 0.89035  | 0.984151 |
| gene2341 | gene2341 | SACOL2344 | gi 57650036 ref NC_002951.2 :2403158-2404066 | q1 | q2 | OK       | 176.367 | 98.812  | -0.835822  | 0.497201 | 0.619047 | 0.978191 |
| gene2342 | gene2342 | SACOL2345 | gi 57650036 ref NC_002951.2 :2404173-2405076 | q1 | q2 | OK       | 88.0322 | 34.1707 | -1.36527   | 1.01271  | 0.311197 | 0.927653 |

|          |          |           |                                              |    |    |          |         |         |           |          |          |          |
|----------|----------|-----------|----------------------------------------------|----|----|----------|---------|---------|-----------|----------|----------|----------|
| gene2343 | gene2343 | SACOL2346 | gi 57650036 ref NC_002951.2 :2405301-2405940 | q1 | q2 | OK       | 51.9352 | 43.2901 | -0.262677 | 0.162811 | 0.870667 | 0.984151 |
| gene2344 | gene2344 | SACOL2347 | gi 57650036 ref NC_002951.2 :2406185-2408117 | q1 | q2 | OK       | 29.6326 | 31.4025 | 0.0836958 | -0.07184 | 0.942728 | 0.987716 |
| gene2345 | gene2345 | SACOL2348 | gi 57650036 ref NC_002951.2 :2408129-2408777 | q1 | q2 | OK       | 32.2116 | 29.2856 | -0.137387 | 0.078931 | 0.937088 | 0.987716 |
| gene2346 | gene2346 | SACOL2349 | gi 57650036 ref NC_002951.2 :2408897-2409449 | q1 | q2 | OK       | 76.7409 | 58.6358 | -0.388214 | 0.247276 | 0.804695 | 0.984151 |
| gene2347 | gene2347 | tcaB      | gi 57650036 ref NC_002951.2 :2409678-2410887 | q1 | q2 | OK       | 21.4601 | 37.1579 | 0.79201   | -0.53505 | 0.592617 | 0.978191 |
| gene2348 | gene2348 | SACOL2351 | gi 57650036 ref NC_002951.2 :2410996-2411125 | q1 | q2 | NOTEST 0 |         | 0       | 0         | 0        | 1        | 1        |
| gene2349 | gene2349 | tcaA      | gi 57650036 ref NC_002951.2 :2411155-2412538 | q1 | q2 | OK       | 19.3449 | 30.8034 | 0.671139  | -0.45426 | 0.649639 | 0.978191 |
| gene235  | gene235  | scdA      | gi 57650036 ref NC_002951.2 :284502-285177   | q1 | q2 | OK       | 61.9894 | 75.7434 | 0.289098  | -0.20204 | 0.839887 | 0.984151 |
| gene2350 | gene2350 | tcaR      | gi 57650036 ref NC_002951.2 :2412777-2413233 | q1 | q2 | OK       | 116.491 | 32.4647 | -1.84327  | 1.08698  | 0.277045 | 0.9146   |
| gene2351 | gene2351 | SACOL2354 | gi 57650036 ref NC_002951.2 :2413427-2414396 | q1 | q2 | OK       | 57.5991 | 50.3798 | -0.193203 | 0.148806 | 0.881707 | 0.984151 |
| gene2352 | gene2352 | SACOL2355 | gi 57650036 ref NC_002951.2 :2414970-2415327 | q1 | q2 | OK       | 4.67822 | 32.1041 | 2.77873   | -1.26574 | 0.205608 | 0.842707 |
| gene2353 | gene2353 | SACOL2356 | gi 57650036 ref NC_002951.2 :2415466-2417187 | q1 | q2 | OK       | 4.34545 | 27.5393 | 2.66391   | -1.00525 | 0.314776 | 0.927653 |
| gene2354 | gene2354 | SACOL2357 | gi 57650036 ref NC_002951.2 :2415466-2417187 | q1 | q2 | OK       | 2.56612 | 28.4263 | 3.46956   | -1.49658 | 0.134503 | 0.842707 |
| gene2355 | gene2355 | SACOL2358 | gi 57650036 ref NC_002951.2 :2417322-2419363 | q1 | q2 | OK       | 11.83   | 50.2095 | 2.08551   | -0.73417 | 0.462845 | 0.956269 |
| gene2356 | gene2356 | SACOL2359 | gi 57650036 ref NC_002951.2 :2417322-2419363 | q1 | q2 | OK       | 34.5362 | 31.3908 | -0.137765 | 0.100571 | 0.919891 | 0.984666 |
| gene2357 | gene2357 | SACOL2360 | gi 57650036 ref NC_002951.2 :2419525-2420421 | q1 | q2 | OK       | 57.9879 | 31.9342 | -0.860649 | 0.385433 | 0.699917 | 0.978191 |
| gene2358 | gene2358 | SACOL2361 | gi 57650036 ref NC_002951.2 :2419525-2420421 | q1 | q2 | OK       | 33.0211 | 23.5756 | -0.486095 | 0.185502 | 0.852835 | 0.984151 |
| gene2359 | gene2359 | mqp1      | gi 57650036 ref NC_002951.2 :2420486-2421965 | q1 | q2 | OK       | 288.232 | 208.376 | -0.468041 | 0.403417 | 0.686642 | 0.978191 |
| gene236  | gene236  | lytS      | gi 57650036 ref NC_002951.2 :285423-287178   | q1 | q2 | OK       | 14.7852 | 79.0797 | 2.41915   | -1.82198 | 0.068457 | 0.742019 |
| gene2360 | gene2360 | SACOL2363 | gi 57650036 ref NC_002951.2 :2422345-2423944 | q1 | q2 | OK       | 125.796 | 39.7553 | -1.66187  | 1.52536  | 0.127169 | 0.842707 |
| gene2361 | gene2361 | SACOL2364 | gi 57650036 ref NC_002951.2 :2424260-2425934 | q1 | q2 | OK       | 36.8182 | 33.2224 | -0.148262 | 0.125945 | 0.899776 | 0.984151 |
| gene2362 | gene2362 | SACOL2365 | gi 57650036 ref NC_002951.2 :2426086-2426716 | q1 | q2 | OK       | 367.392 | 532.294 | 0.534902  | -0.50326 | 0.614781 | 0.978191 |
| gene2363 | gene2363 | SACOL2366 | gi 57650036 ref NC_002951.2 :2427029-2427545 | q1 | q2 | OK       | 15.3346 | 124.866 | 3.02552   | -1.78028 | 0.07503  | 0.754145 |
| gene2364 | gene2364 | SACOL2367 | gi 57650036 ref NC_002951.2 :2427735-2428740 | q1 | q2 | OK       | 97.043  | 65.0031 | -0.578115 | 0.525525 | 0.599218 | 0.978191 |
| gene2365 | gene2365 | SACOL2368 | gi 57650036 ref NC_002951.2 :2428785-2429187 | q1 | q2 | OK       | 35.632  | 78.5018 | 1.13955   | -0.62873 | 0.529525 | 0.963286 |
| gene2366 | gene2366 | SACOL2369 | gi 57650036 ref NC_002951.2 :2429222-2430257 | q1 | q2 | OK       | 23.4296 | 79.1996 | 1.75716   | -1.26981 | 0.204154 | 0.842707 |
| gene2367 | gene2367 | SACOL2371 | gi 57650036 ref NC_002951.2 :2430488-2430920 | q1 | q2 | OK       | 83.7285 | 34.3183 | -1.28674  | 0.726571 | 0.467489 | 0.956269 |
| gene2368 | gene2368 | SACOL2372 | gi 57650036 ref NC_002951.2 :2430971-2431064 | q1 | q2 | NOTEST 0 |         | 0       | 0         | 0        | 1        | 1        |
| gene2369 | gene2369 | SACOL2373 | gi 57650036 ref NC_002951.2 :2431126-2432404 | q1 | q2 | OK       | 13.9783 | 28.741  | 1.03993   | -0.65428 | 0.512934 | 0.963286 |
| gene237  | gene237  | lytR      | gi 57650036 ref NC_002951.2 :287180-287921   | q1 | q2 | OK       | 19.8163 | 24.2185 | 0.289418  | -0.16236 | 0.871022 | 0.984151 |
| gene2370 | gene2370 | SACOL2374 | gi 57650036 ref NC_002951.2 :2432564-2433188 | q1 | q2 | OK       | 46.4121 | 34.4687 | -0.429215 | 0.255659 | 0.798214 | 0.984151 |
| gene2371 | gene2371 | SACOL2375 | gi 57650036 ref NC_002951.2 :2433233-2434178 | q1 | q2 | OK       | 122.584 | 42.6813 | -1.52209  | 1.22537  | 0.220436 | 0.852509 |
| gene2372 | gene2372 | SACOL2376 | gi 57650036 ref NC_002951.2 :2434263-2435706 | q1 | q2 | OK       | 11.5613 | 50.3758 | 2.12342   | -1.46925 | 0.141764 | 0.842707 |

|          |          |           |                                              |    |    |          |         |         |           |          |          |          |
|----------|----------|-----------|----------------------------------------------|----|----|----------|---------|---------|-----------|----------|----------|----------|
| gene2373 | gene2373 | SACOL2377 | gi 57650036 ref NC_002951.2 :2435888-2436272 | q1 | q2 | OK       | 382.64  | 126.434 | -1.5976   | 1.19688  | 0.231352 | 0.863636 |
| gene2374 | gene2374 | SACOL2378 | gi 57650036 ref NC_002951.2 :2437759-2439865 | q1 | q2 | OK       | 36.1984 | 41.6889 | 0.203739  | -0.19461 | 0.845701 | 0.984151 |
| gene2375 | gene2375 | SACOL2379 | gi 57650036 ref NC_002951.2 :2439935-2440358 | q1 | q2 | OK       | 1120.5  | 571.848 | -0.970436 | 0.921578 | 0.356749 | 0.93284  |
| gene2376 | gene2376 | SACOL2380 | gi 57650036 ref NC_002951.2 :2440453-2440576 | q1 | q2 | NOTEST 0 |         | 0       | 0         | 0        | 1        | 1        |
| gene2377 | gene2377 | SACOL2381 | gi 57650036 ref NC_002951.2 :2440622-2440979 | q1 | q2 | OK       | 121.634 | 61.7853 | -0.977208 | 0.559762 | 0.575642 | 0.976548 |
| gene2378 | gene2378 | SACOL2382 | gi 57650036 ref NC_002951.2 :2441382-2442660 | q1 | q2 | OK       | 513.145 | 97.9896 | -2.38866  | 2.07893  | 0.037624 | 0.634426 |
| gene2379 | gene2379 | SACOL2383 | gi 57650036 ref NC_002951.2 :2442841-2443207 | q1 | q2 | OK       | 55.8399 | 42.6288 | -0.389467 | 0.206269 | 0.836581 | 0.984151 |
| gene238  | gene238  | lrgA      | gi 57650036 ref NC_002951.2 :288033-289171   | q1 | q2 | OK       | 6.76526 | 25.4665 | 1.91239   | -0.36439 | 0.715565 | 0.978191 |
| gene2380 | gene2380 | sarZ      | gi 57650036 ref NC_002951.2 :2443604-2444051 | q1 | q2 | OK       | 60.0823 | 31.5718 | -0.928304 | 0.512436 | 0.608346 | 0.978191 |
| gene2381 | gene2381 | SACOL2385 | gi 57650036 ref NC_002951.2 :2444266-2444695 | q1 | q2 | OK       | 720.832 | 101.207 | -2.83236  | 2.15831  | 0.030903 | 0.604847 |
| gene2382 | gene2382 | SACOL2386 | gi 57650036 ref NC_002951.2 :2444801-2445971 | q1 | q2 | OK       | 16.0248 | 35.4158 | 1.14408   | -0.73354 | 0.463231 | 0.956269 |
| gene2383 | gene2383 | SACOL2387 | gi 57650036 ref NC_002951.2 :2446340-2447974 | q1 | q2 | OK       | 3.08944 | 55.6814 | 4.17178   | -1.80195 | 0.071553 | 0.754145 |
| gene2384 | gene2384 | SACOL2388 | gi 57650036 ref NC_002951.2 :2446340-2447974 | q1 | q2 | OK       | 4.95408 | 25.7321 | 2.37688   | -0.95175 | 0.341223 | 0.93284  |
| gene2385 | gene2385 | SACOL2389 | gi 57650036 ref NC_002951.2 :2448231-2448885 | q1 | q2 | OK       | 59.0585 | 39.2228 | -0.59045  | 0.370112 | 0.711299 | 0.978191 |
| gene2386 | gene2386 | SACOL2390 | gi 57650036 ref NC_002951.2 :2448907-2449942 | q1 | q2 | OK       | 59.2321 | 66.0617 | 0.157435  | -0.13415 | 0.89328  | 0.984151 |
| gene2387 | gene2387 | SACOL2391 | gi 57650036 ref NC_002951.2 :2449965-2450418 | q1 | q2 | OK       | 52.0292 | 57.4437 | 0.142827  | -0.08204 | 0.934615 | 0.987716 |
| gene2388 | gene2388 | narI      | gi 57650036 ref NC_002951.2 :2450437-2456914 | q1 | q2 | OK       | 45.1274 | 64.6211 | 0.518001  | -0.2057  | 0.837028 | 0.984151 |
| gene2389 | gene2389 | narJ      | gi 57650036 ref NC_002951.2 :2450437-2456914 | q1 | q2 | OK       | 15.6971 | 16.5574 | 0.0769783 | -0.01471 | 0.98826  | 0.997969 |
| gene239  | gene239  | lrgB      | gi 57650036 ref NC_002951.2 :288033-289171   | q1 | q2 | OK       | 86.6201 | 29.902  | -1.53446  | 0.834813 | 0.403823 | 0.940909 |
| gene2390 | gene2390 | narH      | gi 57650036 ref NC_002951.2 :2450437-2456914 | q1 | q2 | OK       | 18.2213 | 39.347  | 1.11063   | -0.53483 | 0.592768 | 0.978191 |
| gene2391 | gene2391 | narG      | gi 57650036 ref NC_002951.2 :2450437-2456914 | q1 | q2 | OK       | 11.2151 | 36.9574 | 1.72042   | -1.16038 | 0.245893 | 0.885853 |
| gene2392 | gene2392 | SACOL2396 | gi 57650036 ref NC_002951.2 :2457223-2458506 | q1 | q2 | OK       | 17.8381 | 70.6633 | 1.986     | -1.19685 | 0.231364 | 0.863636 |
| gene2393 | gene2393 | nirD      | gi 57650036 ref NC_002951.2 :2457223-2458506 | q1 | q2 | OK       | 14.9451 | 50.2214 | 1.74863   | -0.38793 | 0.698067 | 0.978191 |
| gene2394 | gene2394 | nirB      | gi 57650036 ref NC_002951.2 :2458509-2460915 | q1 | q2 | OK       | 4.11079 | 48.6552 | 3.5651    | -2.38598 | 0.017034 | 0.500083 |
| gene2395 | gene2395 | nirR      | gi 57650036 ref NC_002951.2 :2460980-2461712 | q1 | q2 | OK       | 27.7298 | 77.8841 | 1.48989   | -0.97945 | 0.327356 | 0.927653 |
| gene2396 | gene2396 | SACOL2400 | gi 57650036 ref NC_002951.2 :2461941-2462478 | q1 | q2 | OK       | 34.0708 | 56.3478 | 0.725825  | -0.42207 | 0.672975 | 0.978191 |
| gene2397 | gene2397 | SACOL2401 | gi 57650036 ref NC_002951.2 :2462710-2463535 | q1 | q2 | OK       | 39.4247 | 48.8457 | 0.309133  | -0.20487 | 0.837672 | 0.984151 |
| gene2398 | gene2398 | SACOL2402 | gi 57650036 ref NC_002951.2 :2464017-2464485 | q1 | q2 | OK       | 32.2898 | 48.8705 | 0.597885  | -0.3296  | 0.741706 | 0.978191 |
| gene2399 | gene2399 | SACOL2403 | gi 57650036 ref NC_002951.2 :2464670-2466221 | q1 | q2 | OK       | 19.954  | 32.7346 | 0.714138  | -0.51241 | 0.608367 | 0.978191 |
| gene24   | gene24   | yycJ      | gi 57650036 ref NC_002951.2 :29997-30798     | q1 | q2 | OK       | 85.0863 | 75.0019 | -0.181999 | 0.149683 | 0.881015 | 0.984151 |
| gene240  | gene240  | SACOL0249 | gi 57650036 ref NC_002951.2 :289278-289983   | q1 | q2 | OK       | 148.2   | 80.8988 | -0.873356 | 0.744007 | 0.456872 | 0.956269 |
| gene2400 | gene2400 | SACOL2404 | gi 57650036 ref NC_002951.2 :2466515-2467033 | q1 | q2 | OK       | 9.97133 | 43.3892 | 2.12148   | -0.44265 | 0.658018 | 0.978191 |
| gene2401 | gene2401 | SACOL2405 | gi 57650036 ref NC_002951.2 :2466515-2467033 | q1 | q2 | OK       | 106.382 | 68.5337 | -0.634371 | 0.248938 | 0.803409 | 0.984151 |

|          |          |           |                                              |    |    |             |         |              |              |          |          |
|----------|----------|-----------|----------------------------------------------|----|----|-------------|---------|--------------|--------------|----------|----------|
| gene2402 | gene2402 | SACOL2406 | gi 57650036 ref NC_002951.2 :2467197-2467296 | q1 | q2 | NOTEST 0    | 0       | 0            | 0            | 1        | 1        |
| gene2403 | gene2403 | SACOL2407 | gi 57650036 ref NC_002951.2 :2467305-2467905 | q1 | q2 | OK 54.4781  | 55.1825 | 0.0185364    | -0.01162     | 0.990732 | 0.997969 |
| gene2404 | gene2404 | SACOL2408 | gi 57650036 ref NC_002951.2 :2467923-2468295 | q1 | q2 | OK 94.7684  | 122.723 | 0.372933     | -0.22583     | 0.821336 | 0.984151 |
| gene2405 | gene2405 | fmhA      | gi 57650036 ref NC_002951.2 :2468540-2469791 | q1 | q2 | OK 12.2665  | 31.1484 | 1.34443      | -0.83976     | 0.401045 | 0.940909 |
| gene2406 | gene2406 | SACOL2410 | gi 57650036 ref NC_002951.2 :2469887-2472095 | q1 | q2 | OK 1556.65  | 235.191 | -2.72654     | 1.48207      | 0.138322 | 0.842707 |
| gene2407 | gene2407 | SACOL2411 | gi 57650036 ref NC_002951.2 :2469887-2472095 | q1 | q2 | OK 866.839  | 196.65  | -2.14014     | 0.937937     | 0.348277 | 0.93284  |
| gene2408 | gene2408 | SACOL2412 | gi 57650036 ref NC_002951.2 :2469887-2472095 | q1 | q2 | OK 598.121  | 98.5074 | -2.60213     | 0.933249     | 0.350692 | 0.93284  |
| gene2409 | gene2409 | SACOL2413 | gi 57650036 ref NC_002951.2 :2472215-2473613 | q1 | q2 | OK 68.934   | 60.238  | -0.194541    | 0.187558     | 0.851223 | 0.984151 |
| gene241  | gene241  | SACOL0250 | gi 57650036 ref NC_002951.2 :290131-290923   | q1 | q2 | OK 1.87899  | 20.111  | 3.41995      | -1.66274     | 0.096364 | 0.803494 |
| gene2410 | gene2410 | SACOL2414 | gi 57650036 ref NC_002951.2 :2473829-2473934 | q1 | q2 | NOTEST 0    | 0       | 0            | 0            | 1        | 1        |
| gene2411 | gene2411 | gpmA      | gi 57650036 ref NC_002951.2 :2474087-2474774 | q1 | q2 | OK 430.525  | 156.889 | -1.45635     | 1.38955      | 0.164667 | 0.842707 |
| gene2412 | gene2412 | SACOL2416 | gi 57650036 ref NC_002951.2 :2475099-2475966 | q1 | q2 | OK 49.7988  | 38.4382 | -0.373572    | 0.251792     | 0.801202 | 0.984151 |
| gene2413 | gene2413 | SACOL2418 | gi 57650036 ref NC_002951.2 :2476717-2478028 | q1 | q2 | OK 18.6614  | 43.8168 | 1.23143      | -0.86486     | 0.387116 | 0.940893 |
| gene2414 | gene2414 | hlgA      | gi 57650036 ref NC_002951.2 :2478563-2479493 | q1 | q2 | OK 21.1669  | 51.7366 | 1.28938      | -0.8391      | 0.401414 | 0.940909 |
| gene2415 | gene2415 | SACOL2420 | gi 57650036 ref NC_002951.2 :2479556-2479682 | q1 | q2 | NOTEST 0    | 0       | 0            | 0            | 1        | 1        |
| gene2416 | gene2416 | hlgC      | gi 57650036 ref NC_002951.2 :2480060-2481008 | q1 | q2 | OK 12.3845  | 60.5962 | 2.29069      | -1.45389     | 0.145977 | 0.842707 |
| gene2417 | gene2417 | hlgB      | gi 57650036 ref NC_002951.2 :2481009-2481987 | q1 | q2 | OK 12.4583  | 48.2158 | 1.95239      | -1.21092     | 0.225925 | 0.855481 |
| gene2418 | gene2418 | SACOL2423 | gi 57650036 ref NC_002951.2 :2482038-2482506 | q1 | q2 | OK 3.49079  | 17.7711 | 2.34791      | -1.07821     | 0.280941 | 0.914891 |
| gene2419 | gene2419 | bioW      | gi 57650036 ref NC_002951.2 :2482516-2483209 | q1 | q2 | OK 2.27528  | 49.6806 | 4.44857      | -2.26786     | 0.023337 | 0.582014 |
| gene242  | gene242  | bglA      | gi 57650036 ref NC_002951.2 :290938-292375   | q1 | q2 | OK 12.4987  | 54.4909 | 2.12424      | -1.49187     | 0.135732 | 0.842707 |
| gene2420 | gene2420 | SACOL2425 | gi 57650036 ref NC_002951.2 :2483219-2485320 | q1 | q2 | OK 1.43616  | 44.9351 | 4.96756      | -1.63867     | 0.101282 | 0.815096 |
| gene2421 | gene2421 | bioB      | gi 57650036 ref NC_002951.2 :2483219-2485320 | q1 | q2 | OK 5.17399  | 39.8073 | 2.94368      | -1.50349     | 0.132714 | 0.842707 |
| gene2422 | gene2422 | bioA      | gi 57650036 ref NC_002951.2 :2485321-2487344 | q1 | q2 | OK 2.44571  | 38.3469 | 3.97079      | -2.1975      | 0.027985 | 0.604847 |
| gene2423 | gene2423 | bioD      | gi 57650036 ref NC_002951.2 :2485321-2487344 | q1 | q2 | OK 0.460948 | 47.9675 | 6.70131      | -1.15261     | 0.24907  | 0.889805 |
| gene2424 | gene2424 | SACOL2429 | gi 57650036 ref NC_002951.2 :2487564-2487708 | q1 | q2 | OK 0        | 76.3066 | 1.79769e+30  | 1.79769e+30  | 0.209916 | 0.842707 |
| gene2425 | gene2425 | SACOL2430 | gi 57650036 ref NC_002951.2 :2487795-2489529 | q1 | q2 | OK 3.11129  | 32.7547 | 3.39611      | -2.055       | 0.03988  | 0.641477 |
| gene2426 | gene2426 | SACOL2431 | gi 57650036 ref NC_002951.2 :2489553-2491317 | q1 | q2 | OK 1.66402  | 31.2648 | 4.2318       | -2.43852     | 0.014747 | 0.500083 |
| gene2427 | gene2427 | SACOL2433 | gi 57650036 ref NC_002951.2 :2491944-2492052 | q1 | q2 | OK 2554     | 0       | -1.79769e+30 | -1.79769e+30 | 0.206988 | 0.842707 |
| gene2428 | gene2428 | SACOL2434 | gi 57650036 ref NC_002951.2 :2492186-2492573 | q1 | q2 | OK 33.5921  | 57.896  | 0.785345     | -0.41736     | 0.676412 | 0.978191 |
| gene2429 | gene2429 | SACOL2435 | gi 57650036 ref NC_002951.2 :2492840-2493983 | q1 | q2 | OK 61.7998  | 66.1127 | 0.0973252    | -0.08782     | 0.930022 | 0.987716 |
| gene243  | gene243  | SACOL0252 | gi 57650036 ref NC_002951.2 :292808-293570   | q1 | q2 | OK 5.55433  | 41.9401 | 2.91665      | -1.57228     | 0.115886 | 0.838847 |
| gene2430 | gene2430 | SACOL2436 | gi 57650036 ref NC_002951.2 :2494042-2494702 | q1 | q2 | OK 103.767  | 112.427 | 0.115644     | -0.09628     | 0.923295 | 0.986264 |
| gene2431 | gene2431 | bcr       | gi 57650036 ref NC_002951.2 :2494883-2496095 | q1 | q2 | OK 141.769  | 66.1967 | -1.09871     | 1.05385      | 0.291951 | 0.924214 |



|          |          |           |                                              |    |    |    |         |         |             |           |          |          |
|----------|----------|-----------|----------------------------------------------|----|----|----|---------|---------|-------------|-----------|----------|----------|
| gene2432 | gene2432 | SACOL2438 | gi 57650036 ref NC_002951.2 :2496217-2496691 | q1 | q2 | OK | 31.5231 | 88.4759 | 1.48888     | -0.865    | 0.387037 | 0.940893 |
| gene2433 | gene2433 | SACOL2439 | gi 57650036 ref NC_002951.2 :2496803-2497460 | q1 | q2 | OK | 99.5566 | 84.6309 | -0.234332   | 0.181226  | 0.85619  | 0.984151 |
| gene2434 | gene2434 | SACOL2440 | gi 57650036 ref NC_002951.2 :2497522-2498329 | q1 | q2 | OK | 23.7988 | 62.9444 | 1.40319     | -0.90847  | 0.363628 | 0.93284  |
| gene2435 | gene2435 | SACOL2441 | gi 57650036 ref NC_002951.2 :2498614-2500024 | q1 | q2 | OK | 246.48  | 80.9953 | -1.60556    | 1.48817   | 0.136706 | 0.842707 |
| gene2436 | gene2436 | SACOL2442 | gi 57650036 ref NC_002951.2 :2500161-2502240 | q1 | q2 | OK | 62.7436 | 34.3162 | -0.870577   | 0.833644  | 0.404482 | 0.940909 |
| gene2437 | gene2437 | SACOL2443 | gi 57650036 ref NC_002951.2 :2502379-2504209 | q1 | q2 | OK | 68.879  | 43.5433 | -0.661611   | 0.642386  | 0.520623 | 0.963286 |
| gene2438 | gene2438 | SACOL2445 | gi 57650036 ref NC_002951.2 :2504440-2505937 | q1 | q2 | OK | 51.3295 | 42.6798 | -0.266235   | 0.240624  | 0.809846 | 0.984151 |
| gene2439 | gene2439 | SACOL2446 | gi 57650036 ref NC_002951.2 :2506028-2506880 | q1 | q2 | OK | 76.4813 | 53.9777 | -0.502743   | 0.387956  | 0.698048 | 0.978191 |
| gene244  | gene244  | rbsK      | gi 57650036 ref NC_002951.2 :293820-294735   | q1 | q2 | OK | 31.5123 | 85.2531 | 1.43584     | -1.05039  | 0.293538 | 0.924214 |
| gene2440 | gene2440 | SACOL2448 | gi 57650036 ref NC_002951.2 :2507201-2508137 | q1 | q2 | OK | 29.6839 | 39.6854 | 0.418929    | -0.27187  | 0.785719 | 0.982219 |
| gene2441 | gene2441 | SACOL2449 | gi 57650036 ref NC_002951.2 :2508362-2509763 | q1 | q2 | OK | 125.724 | 70.5815 | -0.832901   | 0.814236  | 0.41551  | 0.947728 |
| gene2442 | gene2442 | SACOL2450 | gi 57650036 ref NC_002951.2 :2510056-2511693 | q1 | q2 | OK | 82.2942 | 52.4772 | -0.649102   | 0.386907  | 0.698825 | 0.978191 |
| gene2443 | gene2443 | SACOL2451 | gi 57650036 ref NC_002951.2 :2510056-2511693 | q1 | q2 | OK | 68.3866 | 76.1003 | 0.154189    | -0.11849  | 0.905677 | 0.984151 |
| gene2444 | gene2444 | SACOL2452 | gi 57650036 ref NC_002951.2 :2511709-2513568 | q1 | q2 | OK | 45.5796 | 48.7032 | 0.0956268   | -0.04563  | 0.963605 | 0.989588 |
| gene2445 | gene2445 | SACOL2453 | gi 57650036 ref NC_002951.2 :2511709-2513568 | q1 | q2 | OK | 43.0019 | 79.3066 | 0.883042    | -0.71985  | 0.471621 | 0.956269 |
| gene2446 | gene2446 | SACOL2454 | gi 57650036 ref NC_002951.2 :2513894-2514014 | q1 | q2 | OK | 0       | 115.984 | 1.79769e+30 | 1.79769e+ | 0.207933 | 0.842707 |
| gene2447 | gene2447 | SACOL2456 | gi 57650036 ref NC_002951.2 :2514237-2515000 | q1 | q2 | OK | 94.2017 | 59.2326 | -0.66936    | 0.440682  | 0.659443 | 0.978191 |
| gene2448 | gene2448 | SACOL2457 | gi 57650036 ref NC_002951.2 :2514237-2515000 | q1 | q2 | OK | 0       | 26.735  | 1.79769e+30 | 1.79769e+ | 0.440965 | 0.956269 |
| gene2449 | gene2449 | SACOL2458 | gi 57650036 ref NC_002951.2 :2515016-2516654 | q1 | q2 | OK | 68.2616 | 38.4722 | -0.82726    | 0.769208  | 0.44177  | 0.956269 |
| gene245  | gene245  | SACOL0254 | gi 57650036 ref NC_002951.2 :294762-295167   | q1 | q2 | OK | 21.0376 | 34.2081 | 0.701364    | -0.35394  | 0.723382 | 0.978191 |
| gene2450 | gene2450 | pnbA      | gi 57650036 ref NC_002951.2 :2517261-2518614 | q1 | q2 | OK | 73.5719 | 111.749 | 0.603036    | -0.59132  | 0.554305 | 0.976548 |
| gene2451 | gene2451 | SACOL2460 | gi 57650036 ref NC_002951.2 :2518675-2519863 | q1 | q2 | OK | 23.6993 | 38.6696 | 0.706354    | -0.48364  | 0.628643 | 0.978191 |
| gene2452 | gene2452 | SACOL2461 | gi 57650036 ref NC_002951.2 :2520258-2521690 | q1 | q2 | OK | 106.918 | 65.0551 | -0.716765   | 0.512076  | 0.608598 | 0.978191 |
| gene2453 | gene2453 | SACOL2462 | gi 57650036 ref NC_002951.2 :2520258-2521690 | q1 | q2 | OK | 39.3761 | 118.323 | 1.58734     | -0.88203  | 0.377761 | 0.940261 |
| gene2454 | gene2454 | pepA2     | gi 57650036 ref NC_002951.2 :2521937-2523014 | q1 | q2 | OK | 150.429 | 103.712 | -0.536506   | 0.529263  | 0.596623 | 0.978191 |
| gene2455 | gene2455 | SACOL2464 | gi 57650036 ref NC_002951.2 :2523368-2523892 | q1 | q2 | OK | 59.828  | 58.2655 | -0.0381771  | 0.014211  | 0.988662 | 0.997969 |
| gene2456 | gene2456 | SACOL2465 | gi 57650036 ref NC_002951.2 :2523368-2523892 | q1 | q2 | OK | 73.4302 | 71.7282 | -0.033833   | 0.013261  | 0.989419 | 0.997969 |
| gene2457 | gene2457 | SACOL2466 | gi 57650036 ref NC_002951.2 :2523997-2524192 | q1 | q2 | OK | 0       | 22.4638 | 1.79769e+30 | 1.79769e+ | 0.200139 | 0.842707 |
| gene2458 | gene2458 | SACOL2467 | gi 57650036 ref NC_002951.2 :2524250-2524706 | q1 | q2 | OK | 139.422 | 53.7213 | -1.37589    | 0.869235  | 0.384719 | 0.940893 |
| gene2459 | gene2459 | SACOL2469 | gi 57650036 ref NC_002951.2 :2524873-2526451 | q1 | q2 | OK | 47.9443 | 69.6535 | 0.538837    | -0.51553  | 0.606185 | 0.978191 |
| gene246  | gene246  | SACOL0255 | gi 57650036 ref NC_002951.2 :295181-296063   | q1 | q2 | OK | 27.9009 | 53.777  | 0.946681    | -0.6273   | 0.530463 | 0.963286 |
| gene2460 | gene2460 | SACOL2470 | gi 57650036 ref NC_002951.2 :2526645-2527395 | q1 | q2 | OK | 35.303  | 28.4894 | -0.309366   | 0.185281  | 0.853008 | 0.984151 |
| gene2461 | gene2461 | SACOL2471 | gi 57650036 ref NC_002951.2 :2527618-2528812 | q1 | q2 | OK | 7.04383 | 39.5892 | 2.49068     | -1.50977  | 0.131103 | 0.842707 |

|          |          |           |                                              |    |    |        |          |         |             |           |          |          |
|----------|----------|-----------|----------------------------------------------|----|----|--------|----------|---------|-------------|-----------|----------|----------|
| gene2462 | gene2462 | SACOL2472 | gi 57650036 ref NC_002951.2 :2528823-2532179 | q1 | q2 | OK     | 6.08673  | 24.5791 | 2.01369     | -0.69105  | 0.489534 | 0.963286 |
| gene2463 | gene2463 | SACOL2473 | gi 57650036 ref NC_002951.2 :2528823-2532179 | q1 | q2 | OK     | 3.24516  | 23.5189 | 2.85746     | -0.83673  | 0.402747 | 0.940909 |
| gene2464 | gene2464 | SACOL2474 | gi 57650036 ref NC_002951.2 :2528823-2532179 | q1 | q2 | OK     | 2.31316  | 60.5564 | 4.71034     | -1.35873  | 0.174233 | 0.842707 |
| gene2465 | gene2465 | SACOL2475 | gi 57650036 ref NC_002951.2 :2528823-2532179 | q1 | q2 | OK     | 4.19772  | 29.729  | 2.82419     | -1.02681  | 0.304509 | 0.927653 |
| gene2466 | gene2466 | SACOL2476 | gi 57650036 ref NC_002951.2 :2532191-2533790 | q1 | q2 | OK     | 5.74623  | 37.6668 | 2.71261     | -1.73029  | 0.083579 | 0.76604  |
| gene2467 | gene2467 | SACOL2477 | gi 57650036 ref NC_002951.2 :2533932-2535147 | q1 | q2 | OK     | 1.07729  | 23.6387 | 4.45568     | -2.26498  | 0.023514 | 0.582014 |
| gene2468 | gene2468 | SACOL2478 | gi 57650036 ref NC_002951.2 :2535226-2536045 | q1 | q2 | OK     | 0        | 26.2303 | 1.79769e+30 | 1.79769e+ | 0.112485 | 0.836566 |
| gene2469 | gene2469 | SACOL2479 | gi 57650036 ref NC_002951.2 :2536055-2536877 | q1 | q2 | OK     | 0.713916 | 23.7939 | 5.05869     | -2.39939  | 0.016422 | 0.500083 |
| gene247  | gene247  | SACOL0257 | gi 57650036 ref NC_002951.2 :296294-297293   | q1 | q2 | OK     | 19.5588  | 82.0452 | 2.0686      | -1.45058  | 0.146897 | 0.842707 |
| gene2470 | gene2470 | SACOL2480 | gi 57650036 ref NC_002951.2 :2537024-2537156 | q1 | q2 | NOTEST | 0        | 0       | 0           | 0         | 1        | 1        |
| gene2471 | gene2471 | SACOL2481 | gi 57650036 ref NC_002951.2 :2537619-2537985 | q1 | q2 | OK     | 82.2903  | 59.3347 | -0.471847   | 0.263405  | 0.792239 | 0.982631 |
| gene2472 | gene2472 | fabG2     | gi 57650036 ref NC_002951.2 :2538247-2539066 | q1 | q2 | OK     | 105.474  | 227.108 | 1.10648     | -1.04656  | 0.295302 | 0.924214 |
| gene2473 | gene2473 | SACOL2483 | gi 57650036 ref NC_002951.2 :2539298-2540837 | q1 | q2 | OK     | 125.038  | 72.0457 | -0.795385   | 0.776862  | 0.43724  | 0.956269 |
| gene2474 | gene2474 | SACOL2484 | gi 57650036 ref NC_002951.2 :2540948-2541371 | q1 | q2 | OK     | 172.712  | 391.635 | 1.18114     | -0.96731  | 0.333389 | 0.927653 |
| gene2475 | gene2475 | SACOL2485 | gi 57650036 ref NC_002951.2 :2541822-2542242 | q1 | q2 | OK     | 207.745  | 157.12  | -0.402948   | 0.303147  | 0.761778 | 0.978191 |
| gene2476 | gene2476 | SACOL2486 | gi 57650036 ref NC_002951.2 :2542259-2542679 | q1 | q2 | OK     | 74.6584  | 145.992 | 0.967518    | -0.61762  | 0.536826 | 0.963603 |
| gene2477 | gene2477 | SACOL2487 | gi 57650036 ref NC_002951.2 :2542945-2543368 | q1 | q2 | OK     | 5.33062  | 16.7027 | 1.64771     | -0.75489  | 0.450316 | 0.956269 |
| gene2478 | gene2478 | SACOL2488 | gi 57650036 ref NC_002951.2 :2543618-2544314 | q1 | q2 | OK     | 179.51   | 205.587 | 0.195685    | -0.19277  | 0.847137 | 0.984151 |
| gene2479 | gene2479 | SACOL2489 | gi 57650036 ref NC_002951.2 :2544761-2544884 | q1 | q2 | NOTEST | 0        | 0       | 0           | 0         | 1        | 1        |
| gene248  | gene248  | SACOL0258 | gi 57650036 ref NC_002951.2 :297443-297623   | q1 | q2 | OK     | 0        | 141.908 | 1.79769e+30 | 1.79769e+ | 0.173559 | 0.842707 |
| gene2480 | gene2480 | SACOL2491 | gi 57650036 ref NC_002951.2 :2545143-2545335 | q1 | q2 | OK     | 387.383  | 43.9175 | -3.14089    | 1.47816   | 0.139365 | 0.842707 |
| gene2481 | gene2481 | SACOL2492 | gi 57650036 ref NC_002951.2 :2545769-2545892 | q1 | q2 | NOTEST | 0        | 0       | 0           | 0         | 1        | 1        |
| gene2482 | gene2482 | SACOL2493 | gi 57650036 ref NC_002951.2 :2545895-2546690 | q1 | q2 | OK     | 19.4389  | 29.5011 | 0.601824    | -0.348    | 0.727837 | 0.978191 |
| gene2483 | gene2483 | SACOL2494 | gi 57650036 ref NC_002951.2 :2547225-2547513 | q1 | q2 | NOTEST | 0        | 0       | 0           | 0         | 1        | 1        |
| gene2484 | gene2484 | SACOL2495 | gi 57650036 ref NC_002951.2 :2547515-2547842 | q1 | q2 | NOTEST | 0        | 0       | 0           | 0         | 1        | 1        |
| gene2485 | gene2485 | SACOL2496 | gi 57650036 ref NC_002951.2 :2548053-2549948 | q1 | q2 | NOTEST | 0        | 0       | 0           | 0         | 1        | 1        |
| gene2486 | gene2486 | SACOL2497 | gi 57650036 ref NC_002951.2 :2548053-2549948 | q1 | q2 | NOTEST | 0        | 0       | 0           | 0         | 1        | 1        |
| gene2487 | gene2487 | SACOL2498 | gi 57650036 ref NC_002951.2 :2550059-2550836 | q1 | q2 | OK     | 16.5973  | 45.1475 | 1.4437      | -0.85288  | 0.393725 | 0.940909 |
| gene2488 | gene2488 | SACOL2499 | gi 57650036 ref NC_002951.2 :2551138-2554000 | q1 | q2 | OK     | 25.0976  | 32.3312 | 0.365376    | -0.34922  | 0.726927 | 0.978191 |
| gene2489 | gene2489 | SACOL2500 | gi 57650036 ref NC_002951.2 :2554001-2554394 | q1 | q2 | OK     | 17.4765  | 81.858  | 2.22771     | -1.16953  | 0.242191 | 0.882723 |
| gene249  | gene249  | SACOL0259 | gi 57650036 ref NC_002951.2 :297672-298065   | q1 | q2 | OK     | 19.9731  | 27.1186 | 0.441223    | -0.21748  | 0.827833 | 0.984151 |
| gene2490 | gene2490 | SACOL2501 | gi 57650036 ref NC_002951.2 :2554510-2556319 | q1 | q2 | OK     | 54.7013  | 52.1602 | -0.0686254  | 0.067247  | 0.946385 | 0.987716 |
| gene2491 | gene2491 | SACOL2502 | gi 57650036 ref NC_002951.2 :2556602-2556869 | q1 | q2 | OK     | 43.2091  | 110.333 | 1.35245     | -0.67934  | 0.496925 | 0.963286 |

|          |          |           |                                              |    |    |        |         |         |             |           |          |          |
|----------|----------|-----------|----------------------------------------------|----|----|--------|---------|---------|-------------|-----------|----------|----------|
| gene2492 | gene2492 | SACOL2503 | gi 57650036 ref NC_002951.2 :2557012-2557321 | q1 | q2 | OK     | 44.8964 | 36.7306 | -0.289617   | 0.14283   | 0.886424 | 0.984151 |
| gene2493 | gene2493 | SACOL2504 | gi 57650036 ref NC_002951.2 :2557642-2558836 | q1 | q2 | OK     | 11.2261 | 62.9876 | 2.48821     | -1.67134  | 0.094655 | 0.794532 |
| gene2494 | gene2494 | SACOL2505 | gi 57650036 ref NC_002951.2 :2559219-2562951 | q1 | q2 | OK     | 8.09755 | 45.6576 | 2.4953      | -1.94007  | 0.052371 | 0.688888 |
| gene2495 | gene2495 | sarT      | gi 57650036 ref NC_002951.2 :2563255-2563612 | q1 | q2 | OK     | 0       | 19.9894 | 1.79769e+30 | 1.79769e+ | 0.163386 | 0.842707 |
| gene2496 | gene2496 | sarU      | gi 57650036 ref NC_002951.2 :2563935-2564679 | q1 | q2 | OK     | 0       | 16.1848 | 1.79769e+30 | 1.79769e+ | 0.135526 | 0.842707 |
| gene2497 | gene2497 | galU      | gi 57650036 ref NC_002951.2 :2564889-2565756 | q1 | q2 | OK     | 46.8109 | 42.9149 | -0.125366   | 0.084941  | 0.932309 | 0.987716 |
| gene2498 | gene2498 | fnbB      | gi 57650036 ref NC_002951.2 :2565935-2568758 | q1 | q2 | OK     | 17.1745 | 63.2968 | 1.88186     | -1.63529  | 0.101989 | 0.815096 |
| gene2499 | gene2499 | SACOL2510 | gi 57650036 ref NC_002951.2 :2568918-2569041 | q1 | q2 | NOTEST | 0       | 0       | 0           | 0         | 1        | 1        |
| gene25   | gene25   | SACOL0024 | gi 57650036 ref NC_002951.2 :31025-33344     | q1 | q2 | OK     | 15.3929 | 41.4884 | 1.43044     | -1.14925  | 0.250453 | 0.889805 |
| gene250  | gene250  | SACOL0260 | gi 57650036 ref NC_002951.2 :298292-298697   | q1 | q2 | NOTEST | 0       | 0       | 0           | 0         | 1        | 1        |
| gene2500 | gene2500 | fnbA      | gi 57650036 ref NC_002951.2 :2569439-2572496 | q1 | q2 | OK     | 66.8693 | 89.6782 | 0.423413    | -0.38991  | 0.696604 | 0.978191 |
| gene2501 | gene2501 | SACOL2513 | gi 57650036 ref NC_002951.2 :2572737-2572932 | q1 | q2 | OK     | 0       | 8.98551 | 1.79769e+30 | 1.79769e+ | 0.206623 | 0.842707 |
| gene2502 | gene2502 | gntP      | gi 57650036 ref NC_002951.2 :2572963-2574322 | q1 | q2 | OK     | 13.3573 | 52.2667 | 1.96826     | -1.36976  | 0.170762 | 0.842707 |
| gene2503 | gene2503 | gntK      | gi 57650036 ref NC_002951.2 :2574438-2575992 | q1 | q2 | OK     | 8.99117 | 29.6586 | 1.72187     | -1.10375  | 0.269701 | 0.905515 |
| gene2504 | gene2504 | gntR      | gi 57650036 ref NC_002951.2 :2576015-2576696 | q1 | q2 | OK     | 7.00492 | 36.8858 | 2.39662     | -1.26939  | 0.204303 | 0.842707 |
| gene2505 | gene2505 | SACOL2517 | gi 57650036 ref NC_002951.2 :2576849-2577614 | q1 | q2 | OK     | 108.893 | 81.2712 | -0.422093   | 0.36124   | 0.71792  | 0.978191 |
| gene2506 | gene2506 | SACOL2518 | gi 57650036 ref NC_002951.2 :2577778-2578471 | q1 | q2 | OK     | 38.2247 | 56.0977 | 0.553436    | -0.35074  | 0.725787 | 0.978191 |
| gene2507 | gene2507 | SACOL2519 | gi 57650036 ref NC_002951.2 :2578701-2579190 | q1 | q2 | OK     | 2029.72 | 815.573 | -1.31539    | 1.10185   | 0.270526 | 0.905515 |
| gene2508 | gene2508 | SACOL2520 | gi 57650036 ref NC_002951.2 :2579256-2581149 | q1 | q2 | OK     | 57.9627 | 83.323  | 0.52359     | -0.51511  | 0.606477 | 0.978191 |
| gene2509 | gene2509 | SACOL2521 | gi 57650036 ref NC_002951.2 :2581557-2582835 | q1 | q2 | OK     | 561.967 | 133.482 | -2.07384    | 1.78104   | 0.074906 | 0.754145 |
| gene251  | gene251  | SACOL0261 | gi 57650036 ref NC_002951.2 :298737-300114   | q1 | q2 | OK     | 4.81508 | 48.737  | 3.33939     | -2.0785   | 0.037664 | 0.634426 |
| gene2510 | gene2510 | SACOL2522 | gi 57650036 ref NC_002951.2 :2583381-2583993 | q1 | q2 | OK     | 130.338 | 92.7631 | -0.49064    | 0.391473  | 0.695448 | 0.978191 |
| gene2511 | gene2511 | SACOL2523 | gi 57650036 ref NC_002951.2 :2584089-2585710 | q1 | q2 | OK     | 6.13283 | 32.7257 | 2.4158      | -1.33443  | 0.182064 | 0.842707 |
| gene2512 | gene2512 | SACOL2524 | gi 57650036 ref NC_002951.2 :2584089-2585710 | q1 | q2 | OK     | 4.41717 | 25.8174 | 2.54715     | -0.62395  | 0.532662 | 0.963286 |
| gene2513 | gene2513 | SACOL2525 | gi 57650036 ref NC_002951.2 :2586137-2586833 | q1 | q2 | OK     | 3.16516 | 33.5442 | 3.40571     | -1.72135  | 0.085187 | 0.767592 |
| gene2514 | gene2514 | SACOL2526 | gi 57650036 ref NC_002951.2 :2586834-2587605 | q1 | q2 | OK     | 9.36515 | 25.4974 | 1.44497     | -0.77686  | 0.437242 | 0.956269 |
| gene2515 | gene2515 | SACOL2527 | gi 57650036 ref NC_002951.2 :2587977-2589942 | q1 | q2 | OK     | 245.57  | 152.446 | -0.68784    | 0.583056  | 0.559856 | 0.976548 |
| gene2516 | gene2516 | SACOL2528 | gi 57650036 ref NC_002951.2 :2590285-2591365 | q1 | q2 | OK     | 56.1197 | 49.2101 | -0.189552   | 0.153411  | 0.878074 | 0.984151 |
| gene2517 | gene2517 | SACOL2529 | gi 57650036 ref NC_002951.2 :2591469-2592063 | q1 | q2 | OK     | 38.0602 | 63.949  | 0.74864     | -0.45876  | 0.646407 | 0.978191 |
| gene2518 | gene2518 | SACOL2530 | gi 57650036 ref NC_002951.2 :2592084-2593053 | q1 | q2 | OK     | 4.29844 | 71.8751 | 4.06361     | -2.41052  | 0.01593  | 0.500083 |
| gene2519 | gene2519 | SACOL2531 | gi 57650036 ref NC_002951.2 :2593130-2593565 | q1 | q2 | OK     | 52.3574 | 36.8409 | -0.507084   | 0.278107  | 0.78093  | 0.982219 |
| gene252  | gene252  | SACOL0262 | gi 57650036 ref NC_002951.2 :300347-301340   | q1 | q2 | OK     | 5.83011 | 37.4154 | 2.68204     | -1.51625  | 0.129456 | 0.842707 |
| gene2520 | gene2520 | SACOL2532 | gi 57650036 ref NC_002951.2 :2593791-2594076 | q1 | q2 | OK     | 324.987 | 83.2476 | -1.9649     | 1.1456    | 0.251962 | 0.889805 |

|          |          |             |                                              |    |    |        |         |         |             |           |          |          |
|----------|----------|-------------|----------------------------------------------|----|----|--------|---------|---------|-------------|-----------|----------|----------|
| gene2521 | gene2521 | SACOL2533   | gi 57650036 ref NC_002951.2 :2594246-2595053 | q1 | q2 | OK     | 191.123 | 191.033 | -0.00068001 | 0.000674  | 0.999462 | 0.99997  |
| gene2522 | gene2522 | frp         | gi 57650036 ref NC_002951.2 :2595172-2595844 | q1 | q2 | OK     | 236.278 | 327.067 | 0.469101    | -0.45934  | 0.645989 | 0.978191 |
| gene2523 | gene2523 | SACOL2535   | gi 57650036 ref NC_002951.2 :2596113-2597106 | q1 | q2 | OK     | 1317.33 | 775.554 | -0.764314   | 0.575962  | 0.564641 | 0.976548 |
| gene2524 | gene2524 | SACOL2536   | gi 57650036 ref NC_002951.2 :2597354-2598155 | q1 | q2 | OK     | 5.91905 | 61.6758 | 3.38127     | -1.92795  | 0.053861 | 0.696046 |
| gene2525 | gene2525 | SACOL2537   | gi 57650036 ref NC_002951.2 :2598475-2599111 | q1 | q2 | OK     | 6.73336 | 16.5451 | 1.29701     | -0.64257  | 0.520502 | 0.963286 |
| gene2526 | gene2526 | SACOL2538   | gi 57650036 ref NC_002951.2 :2599116-2599848 | q1 | q2 | OK     | 15.1253 | 22.8845 | 0.597402    | -0.32613  | 0.744328 | 0.978191 |
| gene2527 | gene2527 | srtA        | gi 57650036 ref NC_002951.2 :2600007-2600628 | q1 | q2 | OK     | 241.337 | 151.591 | -0.67086    | 0.643945  | 0.519611 | 0.963286 |
| gene2528 | gene2528 | SACOL2541   | gi 57650036 ref NC_002951.2 :2600821-2601313 | q1 | q2 | OK     | 31.8091 | 37.5657 | 0.239976    | -0.13124  | 0.895585 | 0.984151 |
| gene2529 | gene2529 | SACOL2542   | gi 57650036 ref NC_002951.2 :2601750-2601921 | q1 | q2 | OK     | 0       | 8.91167 | 1.79769e+30 | 1.79769e+ | 0.207933 | 0.842707 |
| gene253  | gene253  | lytM        | gi 57650036 ref NC_002951.2 :301647-302616   | q1 | q2 | OK     | 293.727 | 133.137 | -1.14156    | 1.09196   | 0.274852 | 0.909967 |
| gene2530 | gene2530 | SACOL2543   | gi 57650036 ref NC_002951.2 :2601982-2602081 | q1 | q2 | NOTEST | 0       | 0       | 0           | 0         | 1        | 1        |
| gene2531 | gene2531 | sdaAA       | gi 57650036 ref NC_002951.2 :2602099-2602999 | q1 | q2 | OK     | 25.8952 | 47.126  | 0.863837    | -0.55931  | 0.575948 | 0.976548 |
| gene2532 | gene2532 | sdaAB       | gi 57650036 ref NC_002951.2 :2603012-2603693 | q1 | q2 | OK     | 9.33989 | 48.3331 | 2.37153     | -1.30743  | 0.191067 | 0.842707 |
| gene2533 | gene2533 | SACOL2546   | gi 57650036 ref NC_002951.2 :2603695-2604739 | q1 | q2 | OK     | 13.7994 | 32.747  | 1.24676     | -0.75445  | 0.450581 | 0.956269 |
| gene2534 | gene2534 | SACOL2547   | gi 57650036 ref NC_002951.2 :2605290-2605494 | q1 | q2 | OK     | 83.9935 | 14.1776 | -2.56666    | 1.10886   | 0.267492 | 0.902533 |
| gene2535 | gene2535 | SACOL2548   | gi 57650036 ref NC_002951.2 :2605649-2606612 | q1 | q2 | OK     | 28.0222 | 81.9043 | 1.54737     | -1.12638  | 0.260006 | 0.898005 |
| gene2536 | gene2536 | SACOL2549   | gi 57650036 ref NC_002951.2 :2606693-2607662 | q1 | q2 | OK     | 115.771 | 125.076 | 0.111528    | -0.10989  | 0.912501 | 0.984151 |
| gene2537 | gene2537 | SACOL2550   | gi 57650036 ref NC_002951.2 :2607794-2608139 | q1 | q2 | OK     | 77.9627 | 53.3317 | -0.54779    | 0.29618   | 0.767093 | 0.978191 |
| gene2538 | gene2538 | SACOL2551   | gi 57650036 ref NC_002951.2 :2608180-2608591 | q1 | q2 | OK     | 62.2874 | 74.9468 | 0.266927    | -0.15436  | 0.877329 | 0.984151 |
| gene2539 | gene2539 | SACOL2552   | gi 57650036 ref NC_002951.2 :2608970-2611037 | q1 | q2 | OK     | 6.37314 | 36.3288 | 2.51104     | -1.71073  | 0.087131 | 0.771794 |
| gene254  | gene254  | SACOL0264   | gi 57650036 ref NC_002951.2 :302667-303327   | q1 | q2 | OK     | 28.8785 | 36.738  | 0.347276    | -0.20244  | 0.839572 | 0.984151 |
| gene2540 | gene2540 | SACOL2553   | gi 57650036 ref NC_002951.2 :2611337-2613077 | q1 | q2 | OK     | 288.487 | 166.602 | -0.792102   | 0.672907  | 0.501006 | 0.963286 |
| gene2541 | gene2541 | SACOL2554   | gi 57650036 ref NC_002951.2 :2613123-2614201 | q1 | q2 | OK     | 140.143 | 206.561 | 0.559669    | -0.51259  | 0.60824  | 0.978191 |
| gene2542 | gene2542 | SACOL2554.1 | gi 57650036 ref NC_002951.2 :2613123-2614201 | q1 | q2 | OK     | 0       | 27.2327 | 1.79769e+30 | 1.79769e+ | 0.321427 | 0.927653 |
| gene2543 | gene2543 | SACOL2555   | gi 57650036 ref NC_002951.2 :2614413-2615298 | q1 | q2 | OK     | 41.9844 | 35.4977 | -0.24213    | 0.158702  | 0.873903 | 0.984151 |
| gene2544 | gene2544 | SACOL2556   | gi 57650036 ref NC_002951.2 :2615458-2615677 | q1 | q2 | OK     | 15413.5 | 556.962 | -4.79047    | 3.35227   | 0.000802 | 0.281629 |
| gene2545 | gene2545 | SACOL2557   | gi 57650036 ref NC_002951.2 :2616065-2616497 | q1 | q2 | OK     | 374.736 | 45.3341 | -3.04721    | 2.08167   | 0.037373 | 0.634426 |
| gene2546 | gene2546 | SACOL2559   | gi 57650036 ref NC_002951.2 :2617256-2617514 | q1 | q2 | OK     | 25.7006 | 20.6908 | -0.312809   | 0.139756  | 0.888853 | 0.984151 |
| gene2547 | gene2547 | SACOL2560   | gi 57650036 ref NC_002951.2 :2618092-2619370 | q1 | q2 | OK     | 66.8526 | 83.6191 | 0.322848    | -0.31196  | 0.755074 | 0.978191 |
| gene2548 | gene2548 | SACOL2561   | gi 57650036 ref NC_002951.2 :2619623-2620790 | q1 | q2 | OK     | 266.949 | 47.7584 | -2.48273    | 2.12504   | 0.033584 | 0.620038 |
| gene2549 | gene2549 | ogt         | gi 57650036 ref NC_002951.2 :2620959-2621481 | q1 | q2 | OK     | 431.495 | 194.883 | -1.14673    | 1.09841   | 0.272024 | 0.906044 |
| gene255  | gene255  | SACOL0265   | gi 57650036 ref NC_002951.2 :303340-305424   | q1 | q2 | OK     | 12.2514 | 27.3283 | 1.15744     | -0.51744  | 0.604852 | 0.978191 |
| gene2550 | gene2550 | SACOL2563   | gi 57650036 ref NC_002951.2 :2621889-2623995 | q1 | q2 | OK     | 195.744 | 152.09  | -0.364036   | 0.310805  | 0.755949 | 0.978191 |

|          |          |           |                                              |    |    |        |         |         |              |            |          |          |
|----------|----------|-----------|----------------------------------------------|----|----|--------|---------|---------|--------------|------------|----------|----------|
| gene2551 | gene2551 | feoB      | gi 57650036 ref NC_002951.2 :2624246-2626241 | q1 | q2 | OK     | 3.37639 | 45.4664 | 3.75125      | -2.39863   | 0.016456 | 0.500083 |
| gene2552 | gene2552 | SACOL2565 | gi 57650036 ref NC_002951.2 :2626252-2626480 | q1 | q2 | OK     | 5.46018 | 12.8993 | 1.24027      | -0.50667   | 0.612385 | 0.978191 |
| gene2553 | gene2553 | SACOL2566 | gi 57650036 ref NC_002951.2 :2626695-2629185 | q1 | q2 | OK     | 1.50798 | 24.8155 | 4.04056      | -2.41135   | 0.015894 | 0.500083 |
| gene2554 | gene2554 | SACOL2567 | gi 57650036 ref NC_002951.2 :2629392-2629878 | q1 | q2 | OK     | 12.1995 | 17.0648 | 0.484198     | -0.23658   | 0.81298  | 0.984151 |
| gene2555 | gene2555 | SACOL2568 | gi 57650036 ref NC_002951.2 :2629954-2630122 | q1 | q2 | OK     | 67.7747 | 0       | -1.79769e+30 | -1.79769e+ | 0.197167 | 0.842707 |
| gene2556 | gene2556 | SACOL2569 | gi 57650036 ref NC_002951.2 :2630233-2631778 | q1 | q2 | OK     | 786.266 | 170.287 | -2.20705     | 1.79158    | 0.0732   | 0.754145 |
| gene2557 | gene2557 | SACOL2570 | gi 57650036 ref NC_002951.2 :2631967-2632567 | q1 | q2 | OK     | 44.8309 | 40.501  | -0.146538    | 0.087337   | 0.930404 | 0.987716 |
| gene2558 | gene2558 | SACOL2571 | gi 57650036 ref NC_002951.2 :2632805-2632997 | q1 | q2 | OK     | 0       | 43.9175 | 1.79769e+30  | 1.79769e+  | 0.190047 | 0.842707 |
| gene2559 | gene2559 | SACOL2572 | gi 57650036 ref NC_002951.2 :2633236-2635645 | q1 | q2 | OK     | 100.381 | 90.6785 | -0.14665     | 0.136552   | 0.891385 | 0.984151 |
| gene256  | gene256  | SACOL0266 | gi 57650036 ref NC_002951.2 :303340-305424   | q1 | q2 | OK     | 14.2644 | 26.294  | 0.88231      | -0.45016   | 0.652594 | 0.978191 |
| gene2560 | gene2560 | SACOL2573 | gi 57650036 ref NC_002951.2 :2635935-2636142 | q1 | q2 | OK     | 639.507 | 49.4477 | -3.69298     | 1.8729     | 0.061083 | 0.708721 |
| gene2561 | gene2561 | SACOL2574 | gi 57650036 ref NC_002951.2 :2636231-2637230 | q1 | q2 | OK     | 148.481 | 80.1041 | -0.890335    | 0.853345   | 0.393468 | 0.940909 |
| gene2562 | gene2562 | SACOL2575 | gi 57650036 ref NC_002951.2 :2637252-2638407 | q1 | q2 | OK     | 46.0967 | 75.075  | 0.703669     | -0.60324   | 0.546353 | 0.97151  |
| gene2563 | gene2563 | crtN      | gi 57650036 ref NC_002951.2 :2638833-2640342 | q1 | q2 | OK     | 121.642 | 77.2595 | -0.654855    | 0.641909   | 0.520932 | 0.963286 |
| gene2564 | gene2564 | crtM      | gi 57650036 ref NC_002951.2 :2640353-2641217 | q1 | q2 | OK     | 122.412 | 101.403 | -0.271649    | 0.259501   | 0.795249 | 0.983954 |
| gene2565 | gene2565 | SACOL2578 | gi 57650036 ref NC_002951.2 :2641253-2644361 | q1 | q2 | OK     | 158.321 | 187.298 | 0.242484     | -0.12875   | 0.897553 | 0.984151 |
| gene2566 | gene2566 | SACOL2579 | gi 57650036 ref NC_002951.2 :2641253-2644361 | q1 | q2 | OK     | 130.14  | 177.232 | 0.445576     | -0.26197   | 0.793349 | 0.9835   |
| gene2567 | gene2567 | SACOL2580 | gi 57650036 ref NC_002951.2 :2641253-2644361 | q1 | q2 | OK     | 73.1792 | 153.459 | 1.06835      | -0.24397   | 0.807252 | 0.984151 |
| gene2568 | gene2568 | SACOL2581 | gi 57650036 ref NC_002951.2 :2644535-2645303 | q1 | q2 | OK     | 1013.87 | 129.043 | -2.97396     | 2.55302    | 0.010679 | 0.500083 |
| gene2569 | gene2569 | SACOL2582 | gi 57650036 ref NC_002951.2 :2645663-2647475 | q1 | q2 | OK     | 77.8627 | 45.0618 | -0.789027    | 0.76681    | 0.443194 | 0.956269 |
| gene257  | gene257  | SACOL0267 | gi 57650036 ref NC_002951.2 :305491-307015   | q1 | q2 | OK     | 67.3468 | 41.8207 | -0.687394    | 0.637385   | 0.523874 | 0.963286 |
| gene2570 | gene2570 | SACOL2583 | gi 57650036 ref NC_002951.2 :2647986-2648475 | q1 | q2 | NOTEST | 0       | 0       | 0            | 0          | 1        | 1        |
| gene2571 | gene2571 | isaA      | gi 57650036 ref NC_002951.2 :2648750-2649452 | q1 | q2 | OK     | 4031.85 | 301.461 | -3.7414      | 3.06179    | 0.0022   | 0.338293 |
| gene2572 | gene2572 | SACOL2585 | gi 57650036 ref NC_002951.2 :2650059-2651115 | q1 | q2 | OK     | 4.36241 | 45.482  | 3.3821       | -1.9469    | 0.051547 | 0.6872   |
| gene2573 | gene2573 | SACOL2587 | gi 57650036 ref NC_002951.2 :2651491-2652094 | q1 | q2 | OK     | 27.0237 | 26.8917 | -0.00706479  | 0.003909   | 0.996881 | 0.998672 |
| gene2574 | gene2574 | SACOL2588 | gi 57650036 ref NC_002951.2 :2652291-2652792 | q1 | q2 | OK     | 6.1564  | 15.2652 | 1.31009      | -0.61914   | 0.535824 | 0.963603 |
| gene2575 | gene2575 | SACOL2589 | gi 57650036 ref NC_002951.2 :2653011-2653242 | q1 | q2 | OK     | 10.4362 | 40.8303 | 1.96804      | -0.85016   | 0.395237 | 0.940909 |
| gene2576 | gene2576 | SACOL2590 | gi 57650036 ref NC_002951.2 :2653391-2653769 | q1 | q2 | OK     | 38.1649 | 50.287  | 0.397938     | -0.20975   | 0.83386  | 0.984151 |
| gene2577 | gene2577 | SACOL2591 | gi 57650036 ref NC_002951.2 :2653785-2654607 | q1 | q2 | OK     | 17.8479 | 55.1887 | 1.62862      | -1.00984   | 0.312573 | 0.927653 |
| gene2578 | gene2578 | SACOL2592 | gi 57650036 ref NC_002951.2 :2654626-2654926 | q1 | q2 | OK     | 7.27838 | 25.1503 | 1.78889      | -0.79184   | 0.428454 | 0.954672 |
| gene2579 | gene2579 | SACOL2593 | gi 57650036 ref NC_002951.2 :2655056-2656311 | q1 | q2 | OK     | 10.2191 | 28.4271 | 1.476        | -0.6455    | 0.518602 | 0.963286 |
| gene258  | gene258  | SACOL0268 | gi 57650036 ref NC_002951.2 :307285-307939   | q1 | q2 | NOTEST | 0       | 0       | 0            | 0          | 1        | 1        |
| gene2580 | gene2580 | SACOL2594 | gi 57650036 ref NC_002951.2 :2655056-2656311 | q1 | q2 | OK     | 2.21856 | 19.4157 | 3.12953      | -0.93085   | 0.351933 | 0.93284  |

|          |          |           |                                              |    |    |            |          |             |             |          |          |
|----------|----------|-----------|----------------------------------------------|----|----|------------|----------|-------------|-------------|----------|----------|
| gene2581 | gene2581 | SACOL2595 | gi 57650036 ref NC_002951.2 :2656320-2657419 | q1 | q2 | NOTEST 0   | 0        | 0           | 0           | 1        | 1        |
| gene2582 | gene2582 | SACOL2596 | gi 57650036 ref NC_002951.2 :2656320-2657419 | q1 | q2 | OK 11.6649 | 45.4022  | 1.96058     | -1.02173    | 0.306907 | 0.927653 |
| gene2583 | gene2583 | SACOL2597 | gi 57650036 ref NC_002951.2 :2657438-2658269 | q1 | q2 | OK 95.3023 | 60.4514  | -0.656735   | 0.534322    | 0.593118 | 0.978191 |
| gene2584 | gene2584 | SACOL2598 | gi 57650036 ref NC_002951.2 :2658415-2659306 | q1 | q2 | OK 13.7623 | 43.698   | 1.66684     | -1.00066    | 0.31699  | 0.927653 |
| gene2585 | gene2585 | SACOL2599 | gi 57650036 ref NC_002951.2 :2659403-2660723 | q1 | q2 | OK 13.0532 | 24.986   | 0.936722    | -0.5799     | 0.561985 | 0.976548 |
| gene2586 | gene2586 | SACOL2600 | gi 57650036 ref NC_002951.2 :2660737-2661844 | q1 | q2 | OK 9.67191 | 30.4008  | 1.65224     | -0.97476    | 0.329682 | 0.927653 |
| gene2587 | gene2587 | SACOL2601 | gi 57650036 ref NC_002951.2 :2662177-2662830 | q1 | q2 | OK 9.96492 | 21.1949  | 1.08879     | -0.29886    | 0.765048 | 0.978191 |
| gene2588 | gene2588 | SACOL2602 | gi 57650036 ref NC_002951.2 :2662177-2662830 | q1 | q2 | OK 10.0905 | 40.243   | 1.99575     | -0.82278    | 0.410634 | 0.940909 |
| gene2589 | gene2589 | SACOL2603 | gi 57650036 ref NC_002951.2 :2662844-2663123 | q1 | q2 | OK 5.8826  | 14.1732  | 1.26864     | -0.53927    | 0.589701 | 0.978191 |
| gene259  | gene259  | SACOL0269 | gi 57650036 ref NC_002951.2 :307972-308560   | q1 | q2 | NOTEST 0   | 0.781875 | 1.79769e+30 | 1.79769e+30 | 0.209916 | 1        |
| gene2590 | gene2590 | SACOL2605 | gi 57650036 ref NC_002951.2 :2663464-2664274 | q1 | q2 | OK 33.5122 | 131.349  | 1.97065     | -1.44726    | 0.147825 | 0.842707 |
| gene2591 | gene2591 | pyrD      | gi 57650036 ref NC_002951.2 :2664548-2665613 | q1 | q2 | OK 16.2475 | 36.1581  | 1.1541      | -0.72214    | 0.470207 | 0.956269 |
| gene2592 | gene2592 | SACOL2607 | gi 57650036 ref NC_002951.2 :2665767-2666043 | q1 | q2 | OK 172.68  | 22.486   | -2.941      | 1.48047     | 0.138748 | 0.842707 |
| gene2593 | gene2593 | SACOL2608 | gi 57650036 ref NC_002951.2 :2666228-2666951 | q1 | q2 | OK 38.4948 | 45.1627  | 0.230469    | -0.14438    | 0.885201 | 0.984151 |
| gene2594 | gene2594 | SACOL2609 | gi 57650036 ref NC_002951.2 :2667304-2667754 | q1 | q2 | OK 2664.63 | 575.746  | -2.21043    | 1.89162     | 0.058542 | 0.702279 |
| gene2595 | gene2595 | SACOL2610 | gi 57650036 ref NC_002951.2 :2667834-2668422 | q1 | q2 | OK 29.8941 | 35.9662  | 0.266781    | -0.15129    | 0.87975  | 0.984151 |
| gene2596 | gene2596 | SACOL2612 | gi 57650036 ref NC_002951.2 :2668554-2670237 | q1 | q2 | OK 10.0992 | 44.7819  | 2.14868     | -1.50182    | 0.133144 | 0.842707 |
| gene2597 | gene2597 | panD      | gi 57650036 ref NC_002951.2 :2670365-2670749 | q1 | q2 | OK 81.5246 | 57.7086  | -0.498449   | 0.281963    | 0.777972 | 0.981979 |
| gene2598 | gene2598 | panC      | gi 57650036 ref NC_002951.2 :2670750-2672413 | q1 | q2 | OK 43.8493 | 120.74   | 1.46127     | -0.99653    | 0.318992 | 0.927653 |
| gene2599 | gene2599 | panB      | gi 57650036 ref NC_002951.2 :2670750-2672413 | q1 | q2 | OK 60.2711 | 69.062   | 0.196426    | -0.12427    | 0.901101 | 0.984151 |
| gene26   | gene26   | SACOL0025 | gi 57650036 ref NC_002951.2 :33575-34055     | q1 | q2 | OK 30.7913 | 115.824  | 1.91134     | -1.14869    | 0.250683 | 0.889805 |
| gene260  | gene260  | SACOL0270 | gi 57650036 ref NC_002951.2 :308702-309596   | q1 | q2 | OK 33.7739 | 71.1367  | 1.07469     | -0.76907    | 0.441853 | 0.956269 |
| gene2600 | gene2600 | SACOL2616 | gi 57650036 ref NC_002951.2 :2672485-2673346 | q1 | q2 | OK 44.2355 | 47.0321  | 0.0884429   | -0.06014    | 0.952046 | 0.988316 |
| gene2601 | gene2601 | budA2     | gi 57650036 ref NC_002951.2 :2673431-2674136 | q1 | q2 | OK 33.2785 | 54.2022  | 0.703762    | -0.4403     | 0.659723 | 0.978191 |
| gene2602 | gene2602 | ldh2      | gi 57650036 ref NC_002951.2 :2674413-2675373 | q1 | q2 | OK 20.5946 | 34.7908  | 0.756437    | -0.46822    | 0.639626 | 0.978191 |
| gene2603 | gene2603 | SACOL2619 | gi 57650036 ref NC_002951.2 :2676059-2677508 | q1 | q2 | OK 232.361 | 121.213  | -0.938817   | 0.865354    | 0.386844 | 0.940893 |
| gene2604 | gene2604 | SACOL2620 | gi 57650036 ref NC_002951.2 :2677588-2678926 | q1 | q2 | OK 76.2873 | 71.7786  | -0.0878881  | 0.085908    | 0.93154  | 0.987716 |
| gene2605 | gene2605 | SACOL2621 | gi 57650036 ref NC_002951.2 :2679183-2679600 | q1 | q2 | OK 117.523 | 75.7335  | -0.633939   | 0.391099    | 0.695724 | 0.978191 |
| gene2606 | gene2606 | fdaB      | gi 57650036 ref NC_002951.2 :2679722-2680613 | q1 | q2 | OK 465.358 | 394.326  | -0.238954   | 0.208564    | 0.834789 | 0.984151 |
| gene2607 | gene2607 | mqs2      | gi 57650036 ref NC_002951.2 :2680805-2682302 | q1 | q2 | OK 831.839 | 184.705  | -2.17109    | 1.75515     | 0.079234 | 0.758524 |
| gene2608 | gene2608 | SACOL2624 | gi 57650036 ref NC_002951.2 :2682986-2684585 | q1 | q2 | OK 226.433 | 195.047  | -0.215259   | 0.188034    | 0.85085  | 0.984151 |
| gene2609 | gene2609 | SACOL2625 | gi 57650036 ref NC_002951.2 :2684778-2685222 | q1 | q2 | OK 210.689 | 135.417  | -0.637706   | 0.486753    | 0.626433 | 0.978191 |
| gene261  | gene261  | SACOL0271 | gi 57650036 ref NC_002951.2 :309843-310137   | q1 | q2 | OK 1783.38 | 594.1    | -1.58584    | 1.51128     | 0.130717 | 0.842707 |

|          |          |           |                                              |    |    |          |         |         |              |              |          |          |
|----------|----------|-----------|----------------------------------------------|----|----|----------|---------|---------|--------------|--------------|----------|----------|
| gene2610 | gene2610 | SACOL2626 | gi 57650036 ref NC_002951.2 :2685502-2685715 | q1 | q2 | OK       | 84.3557 | 23.0331 | -1.87278     | 0.833899     | 0.404338 | 0.940909 |
| gene2611 | gene2611 | betA      | gi 57650036 ref NC_002951.2 :2685992-2687702 | q1 | q2 | OK       | 119.132 | 43.5753 | -1.45098     | 1.37055      | 0.170514 | 0.842707 |
| gene2612 | gene2612 | betB      | gi 57650036 ref NC_002951.2 :2687962-2689453 | q1 | q2 | OK       | 134.493 | 28.2607 | -2.25066     | 1.8569       | 0.063326 | 0.717594 |
| gene2613 | gene2613 | SACOL2629 | gi 57650036 ref NC_002951.2 :2689521-2689617 | q1 | q2 | NOTEST 0 |         | 0       | 0            | 0            | 1        | 1        |
| gene2614 | gene2614 | SACOL2630 | gi 57650036 ref NC_002951.2 :2689705-2690269 | q1 | q2 | OK       | 52.7058 | 33.5203 | -0.652925    | 0.381849     | 0.702573 | 0.978191 |
| gene2615 | gene2615 | SACOL2631 | gi 57650036 ref NC_002951.2 :2690456-2691143 | q1 | q2 | NOTEST 0 |         | 0       | 0            | 0            | 1        | 1        |
| gene2616 | gene2616 | cudT      | gi 57650036 ref NC_002951.2 :2691406-2693029 | q1 | q2 | OK       | 96.9264 | 46.2073 | -1.06877     | 1.02297      | 0.306322 | 0.927653 |
| gene2617 | gene2617 | nrdG      | gi 57650036 ref NC_002951.2 :2693547-2695931 | q1 | q2 | OK       | 113.796 | 133.863 | 0.234306     | -0.13601     | 0.891817 | 0.984151 |
| gene2618 | gene2618 | nrdD      | gi 57650036 ref NC_002951.2 :2693547-2695931 | q1 | q2 | OK       | 35.8326 | 59.2055 | 0.724457     | -0.57223     | 0.567166 | 0.976548 |
| gene2619 | gene2619 | SACOL2636 | gi 57650036 ref NC_002951.2 :2696177-2697548 | q1 | q2 | OK       | 9.30819 | 36.7151 | 1.9798       | -1.26783     | 0.204859 | 0.842707 |
| gene262  | gene262  | SACOL0272 | gi 57650036 ref NC_002951.2 :310220-313922   | q1 | q2 | OK       | 24.5085 | 31.2769 | 0.351813     | -0.32408     | 0.745878 | 0.978191 |
| gene2620 | gene2620 | SACOL2637 | gi 57650036 ref NC_002951.2 :2697869-2697965 | q1 | q2 | NOTEST 0 |         | 0       | 0            | 0            | 1        | 1        |
| gene2621 | gene2621 | SACOL2638 | gi 57650036 ref NC_002951.2 :2698040-2698646 | q1 | q2 | OK       | 30.7218 | 109.05  | 1.82766      | -1.192       | 0.233261 | 0.867938 |
| gene2622 | gene2622 | cysJ      | gi 57650036 ref NC_002951.2 :2698708-2700589 | q1 | q2 | OK       | 11.0836 | 31.5991 | 1.51145      | -1.06029     | 0.289011 | 0.921417 |
| gene2623 | gene2623 | SACOL2640 | gi 57650036 ref NC_002951.2 :2700783-2700876 | q1 | q2 | NOTEST 0 |         | 0       | 0            | 0            | 1        | 1        |
| gene2624 | gene2624 | gpxA2     | gi 57650036 ref NC_002951.2 :2700983-2701481 | q1 | q2 | OK       | 45.8976 | 40.8711 | -0.167339    | 0.095074     | 0.924256 | 0.986264 |
| gene2625 | gene2625 | SACOL2642 | gi 57650036 ref NC_002951.2 :2702175-2702289 | q1 | q2 | NOTEST 0 |         | 0       | 0            | 0            | 1        | 1        |
| gene2626 | gene2626 | SACOL2643 | gi 57650036 ref NC_002951.2 :2702904-2705666 | q1 | q2 | OK       | 18.2671 | 39.2741 | 1.10433      | -0.82637     | 0.408597 | 0.940909 |
| gene2627 | gene2627 | SACOL2644 | gi 57650036 ref NC_002951.2 :2702904-2705666 | q1 | q2 | OK       | 20.1215 | 48.2548 | 1.26193      | -0.56374     | 0.572933 | 0.976548 |
| gene2628 | gene2628 | nsaS      | gi 57650036 ref NC_002951.2 :2705764-2706652 | q1 | q2 | OK       | 30.5424 | 28.9064 | -0.0794239   | 0.049073     | 0.960861 | 0.989588 |
| gene2629 | gene2629 | SACOL2646 | gi 57650036 ref NC_002951.2 :2706662-2707328 | q1 | q2 | OK       | 54.0768 | 64.2584 | 0.248876     | -0.16486     | 0.869053 | 0.984151 |
| gene263  | gene263  | SACOL0273 | gi 57650036 ref NC_002951.2 :310220-313922   | q1 | q2 | OK       | 36.2281 | 37.082  | 0.033612     | -0.01071     | 0.991457 | 0.997969 |
| gene2630 | gene2630 | SACOL2647 | gi 57650036 ref NC_002951.2 :2707353-2707554 | q1 | q2 | OK       | 161.296 | 65.0177 | -1.31081     | 0.61373      | 0.539394 | 0.965252 |
| gene2631 | gene2631 | SACOL2648 | gi 57650036 ref NC_002951.2 :2707751-2709176 | q1 | q2 | OK       | 2.66694 | 26.2756 | 3.30047      | -1.83813     | 0.066044 | 0.73141  |
| gene2632 | gene2632 | SACOL2649 | gi 57650036 ref NC_002951.2 :2709235-2709337 | q1 | q2 | OK       | 12045.1 | 0       | -1.79769e+30 | -1.79769e+30 | 0.206988 | 0.842707 |
| gene2633 | gene2633 | SACOL2650 | gi 57650036 ref NC_002951.2 :2709458-2709914 | q1 | q2 | OK       | 25.6831 | 24.735  | -0.0542622   | 0.027903     | 0.977739 | 0.996527 |
| gene2634 | gene2634 | SACOL2651 | gi 57650036 ref NC_002951.2 :2710158-2710920 | q1 | q2 | OK       | 16.663  | 40.299  | 1.2741       | -0.74085     | 0.458785 | 0.956269 |
| gene2635 | gene2635 | clfB      | gi 57650036 ref NC_002951.2 :2711035-2713777 | q1 | q2 | OK       | 99.2366 | 91.7586 | -0.11303     | 0.102593     | 0.918286 | 0.984217 |
| gene2636 | gene2636 | SACOL2653 | gi 57650036 ref NC_002951.2 :2714126-2714813 | q1 | q2 | OK       | 51.1652 | 25.7642 | -0.989795    | 0.595365     | 0.5516   | 0.975381 |
| gene2637 | gene2637 | arcC2     | gi 57650036 ref NC_002951.2 :2714929-2715871 | q1 | q2 | OK       | 20.516  | 47.1627 | 1.2009       | -0.77065     | 0.440916 | 0.956269 |
| gene2638 | gene2638 | arcD      | gi 57650036 ref NC_002951.2 :2715887-2717318 | q1 | q2 | OK       | 3.00752 | 61.5229 | 4.35448      | -2.65788     | 0.007863 | 0.480028 |
| gene2639 | gene2639 | arcB2     | gi 57650036 ref NC_002951.2 :2717408-2718419 | q1 | q2 | OK       | 1.62767 | 41.3211 | 4.666        | -2.47082     | 0.01348  | 0.500083 |
| gene264  | gene264  | SACOL0274 | gi 57650036 ref NC_002951.2 :310220-313922   | q1 | q2 | OK       | 8.82517 | 15.2034 | 0.784694     | -0.06378     | 0.949143 | 0.987732 |

|          |          |           |                                              |    |    |          |          |         |             |           |          |          |
|----------|----------|-----------|----------------------------------------------|----|----|----------|----------|---------|-------------|-----------|----------|----------|
| gene2640 | gene2640 | arcA      | gi 57650036 ref NC_002951.2 :2718451-2719687 | q1 | q2 | OK       | 0.632964 | 32.0935 | 5.66401     | -2.88093  | 0.003965 | 0.429773 |
| gene2641 | gene2641 | SACOL2658 | gi 57650036 ref NC_002951.2 :2720033-2720483 | q1 | q2 | OK       | 5.6474   | 14.6209 | 1.37237     | -0.63347  | 0.526426 | 0.963286 |
| gene2642 | gene2642 | aur       | gi 57650036 ref NC_002951.2 :2720849-2722379 | q1 | q2 | OK       | 0.163506 | 8.46802 | 5.69461     | -2.62025  | 0.008787 | 0.498321 |
| gene2643 | gene2643 | isaB      | gi 57650036 ref NC_002951.2 :2722802-2723330 | q1 | q2 | NOTEST 0 |          | 0       | 0           | 0         | 1        | 1        |
| gene2644 | gene2644 | SACOL2661 | gi 57650036 ref NC_002951.2 :2723587-2724046 | q1 | q2 | NOTEST 0 |          | 0       | 0           | 0         | 1        | 1        |
| gene2645 | gene2645 | SACOL2662 | gi 57650036 ref NC_002951.2 :2724285-2726160 | q1 | q2 | OK       | 6.33803  | 19.4137 | 1.61497     | -0.9891   | 0.322615 | 0.927653 |
| gene2646 | gene2646 | SACOL2663 | gi 57650036 ref NC_002951.2 :2726236-2728189 | q1 | q2 | OK       | 8.52245  | 37.4747 | 2.13658     | -1.49188  | 0.135731 | 0.842707 |
| gene2647 | gene2647 | manA2     | gi 57650036 ref NC_002951.2 :2728202-2729141 | q1 | q2 | OK       | 14.929   | 43.2992 | 1.53622     | -0.94223  | 0.346074 | 0.93284  |
| gene2648 | gene2648 | SACOL2665 | gi 57650036 ref NC_002951.2 :2729252-2732234 | q1 | q2 | OK       | 45.5335  | 41.0213 | -0.150556   | 0.148929  | 0.88161  | 0.984151 |
| gene2649 | gene2649 | SACOL2666 | gi 57650036 ref NC_002951.2 :2732444-2734304 | q1 | q2 | OK       | 134.058  | 87.0407 | -0.623092   | 0.591561  | 0.554144 | 0.976548 |
| gene265  | gene265  | SACOL0275 | gi 57650036 ref NC_002951.2 :313934-315269   | q1 | q2 | OK       | 9.03311  | 38.6872 | 2.09856     | -1.33963  | 0.180365 | 0.842707 |
| gene2650 | gene2650 | SACOL2667 | gi 57650036 ref NC_002951.2 :2734570-2735131 | q1 | q2 | OK       | 147.494  | 266.101 | 0.851314    | -0.77026  | 0.441144 | 0.956269 |
| gene2651 | gene2651 | SACOL2668 | gi 57650036 ref NC_002951.2 :2735298-2737206 | q1 | q2 | OK       | 76.5953  | 59.0252 | -0.375925   | 0.371591  | 0.710198 | 0.978191 |
| gene2652 | gene2652 | SACOL2669 | gi 57650036 ref NC_002951.2 :2737447-2740307 | q1 | q2 | OK       | 73.3712  | 104.623 | 0.511917    | -0.3176   | 0.750792 | 0.978191 |
| gene2653 | gene2653 | SACOL2670 | gi 57650036 ref NC_002951.2 :2737447-2740307 | q1 | q2 | OK       | 74.4475  | 113.818 | 0.612439    | -0.41448  | 0.678519 | 0.978191 |
| gene2654 | gene2654 | SACOL2671 | gi 57650036 ref NC_002951.2 :2740324-2746753 | q1 | q2 | OK       | 51.7405  | 109.5   | 1.08157     | -0.82481  | 0.409479 | 0.940909 |
| gene2655 | gene2655 | SACOL2672 | gi 57650036 ref NC_002951.2 :2740324-2746753 | q1 | q2 | OK       | 5.22117  | 33.16   | 2.667       | -0.50583  | 0.612974 | 0.978191 |
| gene2656 | gene2656 | SACOL2673 | gi 57650036 ref NC_002951.2 :2740324-2746753 | q1 | q2 | OK       | 4.763    | 46.0259 | 3.27251     | -0.85641  | 0.391769 | 0.940909 |
| gene2657 | gene2657 | SACOL2674 | gi 57650036 ref NC_002951.2 :2740324-2746753 | q1 | q2 | OK       | 4.65614  | 33.5104 | 2.8474      | -0.69843  | 0.484909 | 0.962734 |
| gene2658 | gene2658 | secY      | gi 57650036 ref NC_002951.2 :2746763-2747975 | q1 | q2 | OK       | 2.37722  | 27.0944 | 3.51065     | -1.88702  | 0.059157 | 0.702279 |
| gene2659 | gene2659 | SACOL2676 | gi 57650036 ref NC_002951.2 :2748104-2754890 | q1 | q2 | OK       | 16.7632  | 20.0618 | 0.259154    | -0.25601  | 0.79794  | 0.984151 |
| gene266  | gene266  | yukA      | gi 57650036 ref NC_002951.2 :315290-319730   | q1 | q2 | OK       | 9.82813  | 27.7421 | 1.49709     | -1.28902  | 0.197391 | 0.842707 |
| gene2660 | gene2660 | SACOL2677 | gi 57650036 ref NC_002951.2 :2755243-2755354 | q1 | q2 | NOTEST 0 |          | 0       | 0           | 0         | 1        | 1        |
| gene2661 | gene2661 | SACOL2678 | gi 57650036 ref NC_002951.2 :2755434-2756127 | q1 | q2 | OK       | 2.27528  | 4.14005 | 0.863604    | -0.38482  | 0.700368 | 0.978191 |
| gene2662 | gene2662 | SACOL2680 | gi 57650036 ref NC_002951.2 :2756807-2757110 | q1 | q2 | OK       | 2.3634   | 24.5296 | 3.37559     | -1.45886  | 0.144602 | 0.842707 |
| gene2663 | gene2663 | SACOL2681 | gi 57650036 ref NC_002951.2 :2757263-2757623 | q1 | q2 | OK       | 250.657  | 262.027 | 0.0640022   | -0.04872  | 0.961141 | 0.989588 |
| gene2664 | gene2664 | SACOL2682 | gi 57650036 ref NC_002951.2 :2757707-2758319 | q1 | q2 | OK       | 17.5984  | 57.085  | 1.69766     | -0.97015  | 0.331972 | 0.927653 |
| gene2665 | gene2665 | SACOL2683 | gi 57650036 ref NC_002951.2 :2758397-2758874 | q1 | q2 | OK       | 8.41972  | 52.042  | 2.62783     | -1.34321  | 0.179203 | 0.842707 |
| gene2666 | gene2666 | SACOL2684 | gi 57650036 ref NC_002951.2 :2758876-2759377 | q1 | q2 | OK       | 4.6173   | 39.4904 | 3.09638     | -1.52271  | 0.127832 | 0.842707 |
| gene2667 | gene2667 | cap1C     | gi 57650036 ref NC_002951.2 :2759611-2761068 | q1 | q2 | OK       | 4.70838  | 31.5839 | 2.74588     | -1.28731  | 0.197987 | 0.842707 |
| gene2668 | gene2668 | cap1B     | gi 57650036 ref NC_002951.2 :2759611-2761068 | q1 | q2 | OK       | 0.910112 | 71.0019 | 6.28567     | -1.53214  | 0.125488 | 0.842707 |
| gene2669 | gene2669 | cap1A     | gi 57650036 ref NC_002951.2 :2761084-2761747 | q1 | q2 | OK       | 0        | 17.1546 | 1.79769e+30 | 1.79769e+ | 0.138827 | 0.842707 |
| gene267  | gene267  | SACOL0277 | gi 57650036 ref NC_002951.2 :319759-320152   | q1 | q2 | NOTEST 0 |          | 0       | 0           | 0         | 1        | 1        |



|          |          |           |                                              |    |    |          |          |           |             |             |          |          |
|----------|----------|-----------|----------------------------------------------|----|----|----------|----------|-----------|-------------|-------------|----------|----------|
| gene2670 | gene2670 | icaR      | gi 57650036 ref NC_002951.2 :2762595-2763156 | q1 | q2 | OK       | 82.2929  | 67.293    | -0.290311   | 0.190783    | 0.848695 | 0.984151 |
| gene2671 | gene2671 | icaA      | gi 57650036 ref NC_002951.2 :2763319-2766734 | q1 | q2 | OK       | 1.68292  | 46.3034   | 4.78208     | -1.42305    | 0.15472  | 0.842707 |
| gene2672 | gene2672 | icaD      | gi 57650036 ref NC_002951.2 :2763319-2766734 | q1 | q2 | OK       | 11.515   | 20.5185   | 0.833409    | -0.14268    | 0.88654  | 0.984151 |
| gene2673 | gene2673 | icaB      | gi 57650036 ref NC_002951.2 :2763319-2766734 | q1 | q2 | OK       | 0.977741 | 25.0321   | 4.67819     | -0.85072    | 0.394924 | 0.940909 |
| gene2674 | gene2674 | icaC      | gi 57650036 ref NC_002951.2 :2763319-2766734 | q1 | q2 | OK       | 9.0248   | 18.5925   | 1.04275     | -0.46097    | 0.64482  | 0.978191 |
| gene2675 | gene2675 | SACOL2693 | gi 57650036 ref NC_002951.2 :2767031-2767097 | q1 | q2 | NOTEST 0 |          | 0         | 0           | 0           | 1        | 1        |
| gene2676 | gene2676 | geh       | gi 57650036 ref NC_002951.2 :2767124-2769167 | q1 | q2 | OK       | 359.843  | 268.485   | -0.422525   | 0.329443    | 0.741821 | 0.978191 |
| gene2677 | gene2677 | SACOL2695 | gi 57650036 ref NC_002951.2 :2769887-2770100 | q1 | q2 | OK       | 0        | 11.5165   | 1.79769e+30 | 1.79769e+30 | 0.20195  | 0.842707 |
| gene2678 | gene2678 | hisI      | gi 57650036 ref NC_002951.2 :2770259-2774476 | q1 | q2 | OK       | 5.21746  | 35.891    | 2.78221     | -0.73116    | 0.464684 | 0.956269 |
| gene2679 | gene2679 | hisF      | gi 57650036 ref NC_002951.2 :2770259-2774476 | q1 | q2 | OK       | 6.38337  | 55.3558   | 3.11635     | -1.06483    | 0.286955 | 0.921417 |
| gene268  | gene268  | SACOL0278 | gi 57650036 ref NC_002951.2 :320167-321473   | q1 | q2 | NOTEST 0 |          | 0         | 0           | 0           | 1        | 1        |
| gene2680 | gene2680 | hisA      | gi 57650036 ref NC_002951.2 :2770259-2774476 | q1 | q2 | OK       | 11.5365  | 69.9774   | 2.60068     | -1.07957    | 0.280335 | 0.914891 |
| gene2681 | gene2681 | hisH      | gi 57650036 ref NC_002951.2 :2770259-2774476 | q1 | q2 | OK       | 2.40397  | 33.851    | 3.8157      | -0.68647    | 0.492415 | 0.963286 |
| gene2682 | gene2682 | hisB      | gi 57650036 ref NC_002951.2 :2770259-2774476 | q1 | q2 | OK       | 3.00497  | 29.0532   | 3.27328     | -0.63564    | 0.525009 | 0.963286 |
| gene2683 | gene2683 | SACOL2701 | gi 57650036 ref NC_002951.2 :2770259-2774476 | q1 | q2 | OK       | 2.70248  | 23.0004   | 3.0893      | -0.83022    | 0.406414 | 0.940909 |
| gene2684 | gene2684 | hisD      | gi 57650036 ref NC_002951.2 :2774491-2776349 | q1 | q2 | OK       | 2.48041  | 19.7647   | 2.99428     | -1.30942    | 0.190392 | 0.842707 |
| gene2685 | gene2685 | hisG      | gi 57650036 ref NC_002951.2 :2774491-2776349 | q1 | q2 | OK       | 4.91163  | 20.5253   | 2.06313     | -0.70917    | 0.47822  | 0.956269 |
| gene2686 | gene2686 | hisZ      | gi 57650036 ref NC_002951.2 :2776366-2777185 | q1 | q2 | OK       | 3.22881  | 35.0291   | 3.43948     | -1.79448    | 0.072736 | 0.754145 |
| gene2687 | gene2687 | SACOL2705 | gi 57650036 ref NC_002951.2 :2777489-2778614 | q1 | q2 | OK       | 32.7018  | 60.6492   | 0.891119    | -0.6774     | 0.498152 | 0.963286 |
| gene2688 | gene2688 | SACOL2706 | gi 57650036 ref NC_002951.2 :2778731-2779229 | q1 | q2 | OK       | 7.77926  | 21.7756   | 1.48501     | -0.7225     | 0.46999  | 0.956269 |
| gene2689 | gene2689 | SACOL2707 | gi 57650036 ref NC_002951.2 :2779275-2781818 | q1 | q2 | OK       | 6.99881  | 25.6262   | 1.87244     | -0.6866     | 0.492335 | 0.963286 |
| gene269  | gene269  | SACOL0279 | gi 57650036 ref NC_002951.2 :320167-321473   | q1 | q2 | NOTEST 0 |          | 0         | 0           | 0           | 1        | 1        |
| gene2690 | gene2690 | SACOL2708 | gi 57650036 ref NC_002951.2 :2779275-2781818 | q1 | q2 | OK       | 7.02741  | 34.8609   | 2.31055     | -1.37778    | 0.168271 | 0.842707 |
| gene2691 | gene2691 | SACOL2709 | gi 57650036 ref NC_002951.2 :2781870-2782425 | q1 | q2 | OK       | 5.80021  | 39.4376   | 2.76539     | -1.40163    | 0.161027 | 0.842707 |
| gene2692 | gene2692 | SACOL2710 | gi 57650036 ref NC_002951.2 :2782453-2783302 | q1 | q2 | OK       | 10.2464  | 62.7819   | 2.61523     | -1.58595    | 0.11275  | 0.836566 |
| gene2693 | gene2693 | SACOL2711 | gi 57650036 ref NC_002951.2 :2783681-2784197 | q1 | q2 | OK       | 825.877  | 298.22    | -1.46955    | 1.39115     | 0.164179 | 0.842707 |
| gene2694 | gene2694 | drp35     | gi 57650036 ref NC_002951.2 :2784345-2785317 | q1 | q2 | OK       | 15.127   | 35.4664   | 1.22933     | -0.74328    | 0.45731  | 0.956269 |
| gene2695 | gene2695 | SACOL2713 | gi 57650036 ref NC_002951.2 :2785560-2786517 | q1 | q2 | OK       | 78.3467  | 41.4741   | -0.917661   | 0.710524    | 0.477379 | 0.956269 |
| gene2696 | gene2696 | pcp       | gi 57650036 ref NC_002951.2 :2786668-2787307 | q1 | q2 | OK       | 15.4263  | 24.5388   | 0.66967     | -0.35789    | 0.720425 | 0.978191 |
| gene2697 | gene2697 | SACOL2715 | gi 57650036 ref NC_002951.2 :2787425-2788521 | q1 | q2 | NOTEST 0 |          | 0         | 0           | 0           | 1        | 1        |
| gene2698 | gene2698 | SACOL2716 | gi 57650036 ref NC_002951.2 :2787425-2788521 | q1 | q2 | NOTEST 0 |          | 0         | 0           | 0           | 1        | 1        |
| gene2699 | gene2699 | SACOL2717 | gi 57650036 ref NC_002951.2 :2788687-2789152 | q1 | q2 | OK       | 53.006   | 44.8998   | -0.239448   | 0.136046    | 0.891785 | 0.984151 |
| gene27   | gene27   | SACOL0026 | gi 57650036 ref NC_002951.2 :34371-35667     | q1 | q2 | NOTEST 0 |          | 0.0948871 | 1.79769e+30 | 1.79769e+30 | 0.207933 | 1        |

|          |          |           |                                              |    |    |            |          |             |             |          |          |
|----------|----------|-----------|----------------------------------------------|----|----|------------|----------|-------------|-------------|----------|----------|
| gene270  | gene270  | SACOL0280 | gi 57650036 ref NC_002951.2 :320167-321473   | q1 | q2 | NOTEST 0   | 0        | 0           | 0           | 1        | 1        |
| gene2700 | gene2700 | SACOL2718 | gi 57650036 ref NC_002951.2 :2789389-2790808 | q1 | q2 | OK 23.9443 | 36.4005  | 0.604276    | -0.43925    | 0.660481 | 0.978191 |
| gene2701 | gene2701 | rarD      | gi 57650036 ref NC_002951.2 :2791220-2792129 | q1 | q2 | OK 54.8501 | 71.2675  | 0.377749    | -0.29842    | 0.765382 | 0.978191 |
| gene2702 | gene2702 | SACOL2720 | gi 57650036 ref NC_002951.2 :2792353-2792929 | q1 | q2 | OK 10.9099 | 18.8003  | 0.78512     | -0.39552    | 0.692458 | 0.978191 |
| gene2703 | gene2703 | nixA      | gi 57650036 ref NC_002951.2 :2793057-2794110 | q1 | q2 | OK 31.1624 | 33.865   | 0.119987    | -0.07964    | 0.936523 | 0.987716 |
| gene2704 | gene2704 | SACOL2722 | gi 57650036 ref NC_002951.2 :2794352-2795147 | q1 | q2 | NOTEST 0   | 0.172521 | 1.79769e+30 | 1.79769e+30 | 0.207933 | 1        |
| gene2705 | gene2705 | SACOL2723 | gi 57650036 ref NC_002951.2 :2795280-2795793 | q1 | q2 | OK 42.0525 | 66.5177  | 0.661549    | -0.39261    | 0.694611 | 0.978191 |
| gene2706 | gene2706 | SACOL2724 | gi 57650036 ref NC_002951.2 :2796075-2798704 | q1 | q2 | OK 5.18649 | 29.5109  | 2.50842     | -0.99651    | 0.319004 | 0.927653 |
| gene2707 | gene2707 | SACOL2725 | gi 57650036 ref NC_002951.2 :2796075-2798704 | q1 | q2 | OK 2.06207 | 19.9049  | 3.27096     | -1.54129    | 0.123246 | 0.842707 |
| gene2708 | gene2708 | SACOL2726 | gi 57650036 ref NC_002951.2 :2798796-2798988 | q1 | q2 | NOTEST 0   | 0        | 0           | 0           | 1        | 1        |
| gene2709 | gene2709 | SACOL2727 | gi 57650036 ref NC_002951.2 :2798999-2799536 | q1 | q2 | OK 4.76991 | 4.77018  | 8.35E-05    | -3.74E-05   | 0.99997  | 0.99997  |
| gene271  | gene271  | SACOL0281 | gi 57650036 ref NC_002951.2 :321482-323327   | q1 | q2 | NOTEST 0   | 0        | 0           | 0           | 1        | 1        |
| gene2710 | gene2710 | SACOL2728 | gi 57650036 ref NC_002951.2 :2799595-2800093 | q1 | q2 | OK 3.88963 | 11.7253  | 1.59192     | -0.72657    | 0.467489 | 0.956269 |
| gene2711 | gene2711 | SACOL2729 | gi 57650036 ref NC_002951.2 :2800171-2800522 | q1 | q2 | OK 9.74864 | 13.8     | 0.501391    | -0.22615    | 0.821089 | 0.984151 |
| gene2712 | gene2712 | SACOL2730 | gi 57650036 ref NC_002951.2 :2800550-2800742 | q1 | q2 | NOTEST 0   | 0        | 0           | 0           | 1        | 1        |
| gene2713 | gene2713 | SACOL2731 | gi 57650036 ref NC_002951.2 :2801134-2801335 | q1 | q2 | OK 3539.56 | 413.053  | -3.09917    | 2.12497     | 0.033589 | 0.620038 |
| gene2714 | gene2714 | SACOL2732 | gi 57650036 ref NC_002951.2 :2801461-2802031 | q1 | q2 | OK 24.6637 | 29.4555  | 0.256146    | -0.13989    | 0.888746 | 0.984151 |
| gene2715 | gene2715 | SACOL2733 | gi 57650036 ref NC_002951.2 :2802290-2802671 | q1 | q2 | OK 2.67716 | 208.76   | 6.285       | -3.21409    | 0.001309 | 0.338293 |
| gene2716 | gene2716 | SACOL2734 | gi 57650036 ref NC_002951.2 :2802753-2803107 | q1 | q2 | OK 4.77456 | 55.4685  | 3.53823     | -1.65615    | 0.097692 | 0.809772 |
| gene2717 | gene2717 | SACOL2735 | gi 57650036 ref NC_002951.2 :2803560-2804400 | q1 | q2 | OK 116.089 | 73.7663  | -0.654198   | 0.57789     | 0.563338 | 0.976548 |
| gene2718 | gene2718 | gidB      | gi 57650036 ref NC_002951.2 :2804442-2807039 | q1 | q2 | OK 92.0853 | 83.3589  | -0.143634   | 0.07156     | 0.942952 | 0.987716 |
| gene2719 | gene2719 | gidA      | gi 57650036 ref NC_002951.2 :2804442-2807039 | q1 | q2 | OK 73.5944 | 73.5916  | -5.52E-05   | 4.53E-05    | 0.999964 | 0.99997  |
| gene272  | gene272  | SACOL0282 | gi 57650036 ref NC_002951.2 :323337-323829   | q1 | q2 | OK 0       | 3.41507  | 1.79769e+30 | 1.79769e+30 | 0.188537 | 0.842707 |
| gene2720 | gene2720 | trmE      | gi 57650036 ref NC_002951.2 :2807105-2808485 | q1 | q2 | OK 72.4083 | 57.085   | -0.343043   | 0.328746    | 0.742348 | 0.978191 |
| gene2721 | gene2721 | rnpA      | gi 57650036 ref NC_002951.2 :2808623-2808971 | q1 | q2 | OK 46.4569 | 31.2924  | -0.57008    | 0.288385    | 0.773052 | 0.980274 |
| gene2722 | gene2722 | rpmH      | gi 57650036 ref NC_002951.2 :2809097-2809235 | q1 | q2 | OK 6554.64 | 308.159  | -4.41077    | 2.15019     | 0.03154  | 0.604847 |
| gene273  | gene273  | SACOL0283 | gi 57650036 ref NC_002951.2 :324036-324720   | q1 | q2 | NOTEST 0   | 0        | 0           | 0           | 1        | 1        |
| gene274  | gene274  | SACOL0284 | gi 57650036 ref NC_002951.2 :324866-325478   | q1 | q2 | NOTEST 0   | 0        | 0           | 0           | 1        | 1        |
| gene275  | gene275  | SACOL0285 | gi 57650036 ref NC_002951.2 :325613-325832   | q1 | q2 | OK 132.657 | 33.0617  | -2.00447    | 0.934333    | 0.350132 | 0.93284  |
| gene276  | gene276  | SACOL0286 | gi 57650036 ref NC_002951.2 :325963-326464   | q1 | q2 | OK 0.76955 | 16.2607  | 4.40123     | -1.94764    | 0.051458 | 0.6872   |
| gene277  | gene277  | SACOL0287 | gi 57650036 ref NC_002951.2 :326474-326975   | q1 | q2 | OK 0       | 1.65926  | 1.79769e+30 | 1.79769e+30 | 0.200139 | 0.842707 |
| gene278  | gene278  | SACOL0288 | gi 57650036 ref NC_002951.2 :326985-327481   | q1 | q2 | OK 1.56722 | 32.029   | 4.3531      | -2.01804    | 0.043587 | 0.650674 |
| gene279  | gene279  | SACOL0289 | gi 57650036 ref NC_002951.2 :327491-327983   | q1 | q2 | OK 0       | 3.41507  | 1.79769e+30 | 1.79769e+30 | 0.188537 | 0.842707 |

|         |         |           |                                            |    |    |        |          |         |             |             |          |          |
|---------|---------|-----------|--------------------------------------------|----|----|--------|----------|---------|-------------|-------------|----------|----------|
| gene28  | gene28  | SACOL0027 | gi 57650036 ref NC_002951.2 :36081-36321   | q1 | q2 | NOTEST | 0        | 0       | 0           | 1           | 1        |          |
| gene280 | gene280 | SACOL0290 | gi 57650036 ref NC_002951.2 :328192-328876 | q1 | q2 | NOTEST | 0        | 0       | 0           | 1           | 1        |          |
| gene281 | gene281 | SACOL0291 | gi 57650036 ref NC_002951.2 :329461-329962 | q1 | q2 | NOTEST | 0        | 0       | 0           | 1           | 1        |          |
| gene282 | gene282 | SACOL0292 | gi 57650036 ref NC_002951.2 :329973-330474 | q1 | q2 | NOTEST | 0        | 0       | 0           | 1           | 1        |          |
| gene283 | gene283 | SACOL0293 | gi 57650036 ref NC_002951.2 :330484-330985 | q1 | q2 | OK     | 3.0782   | 9.29185 | 1.59388     | -0.71421    | 0.475095 | 0.956269 |
| gene284 | gene284 | SACOL0294 | gi 57650036 ref NC_002951.2 :330995-331496 | q1 | q2 | OK     | 0        | 1.99111 | 1.79769e+30 | 1.79769e+30 | 0.197353 | 0.842707 |
| gene285 | gene285 | SACOL0295 | gi 57650036 ref NC_002951.2 :331506-332007 | q1 | q2 | NOTEST | 0        | 0       | 0           | 1           | 1        |          |
| gene286 | gene286 | SACOL0296 | gi 57650036 ref NC_002951.2 :332017-332518 | q1 | q2 | NOTEST | 0        | 0       | 0           | 1           | 1        |          |
| gene287 | gene287 | SACOL0297 | gi 57650036 ref NC_002951.2 :332528-333017 | q1 | q2 | OK     | 0.804167 | 3.44851 | 2.10041     | -0.87316    | 0.382575 | 0.940893 |
| gene288 | gene288 | SACOL0299 | gi 57650036 ref NC_002951.2 :333639-334014 | q1 | q2 | OK     | 29.1545  | 43.9315 | 0.591537    | -0.3032     | 0.761735 | 0.978191 |
| gene289 | gene289 | SACOL0300 | gi 57650036 ref NC_002951.2 :334166-334565 | q1 | q2 | OK     | 79.6822  | 35.6444 | -1.16058    | 0.639162    | 0.522718 | 0.963286 |
| gene29  | gene29  | SACOL0028 | gi 57650036 ref NC_002951.2 :36352-37027   | q1 | q2 | OK     | 497.808  | 530.848 | 0.0927079   | -0.0841     | 0.932973 | 0.987716 |
| gene290 | gene290 | SACOL0301 | gi 57650036 ref NC_002951.2 :334780-335626 | q1 | q2 | OK     | 105.36   | 43.4772 | -1.277      | 0.983054    | 0.325581 | 0.927653 |
| gene291 | gene291 | brnQ2     | gi 57650036 ref NC_002951.2 :335841-337149 | q1 | q2 | OK     | 129.021  | 35.8604 | -1.84715    | 1.57262     | 0.115808 | 0.838847 |
| gene292 | gene292 | SACOL0303 | gi 57650036 ref NC_002951.2 :337732-338623 | q1 | q2 | OK     | 72.9722  | 30.7228 | -1.24804    | 0.882803    | 0.377343 | 0.940261 |
| gene293 | gene293 | SACOL0305 | gi 57650036 ref NC_002951.2 :338871-339921 | q1 | q2 | OK     | 116.314  | 186.475 | 0.68096     | -0.66549    | 0.505736 | 0.963286 |
| gene294 | gene294 | SACOL0306 | gi 57650036 ref NC_002951.2 :339933-340611 | q1 | q2 | OK     | 232.688  | 204.74  | -0.184605   | 0.183009    | 0.854791 | 0.984151 |
| gene295 | gene295 | pfoR      | gi 57650036 ref NC_002951.2 :340818-341850 | q1 | q2 | OK     | 149.29   | 107.216 | -0.477596   | 0.471585    | 0.637223 | 0.978191 |
| gene296 | gene296 | SACOL0308 | gi 57650036 ref NC_002951.2 :342192-344209 | q1 | q2 | OK     | 3.57836  | 33.96   | 3.24647     | -1.48582    | 0.137325 | 0.842707 |
| gene297 | gene297 | SACOL0309 | gi 57650036 ref NC_002951.2 :342192-344209 | q1 | q2 | OK     | 3.96466  | 44.6028 | 3.49186     | -1.51995    | 0.128524 | 0.842707 |
| gene298 | gene298 | SACOL0310 | gi 57650036 ref NC_002951.2 :344219-345440 | q1 | q2 | OK     | 3.21242  | 18.2116 | 2.50313     | -1.32858    | 0.183986 | 0.842707 |
| gene299 | gene299 | SACOL0311 | gi 57650036 ref NC_002951.2 :345544-347077 | q1 | q2 | OK     | 13.0505  | 35.5962 | 1.44761     | -0.99053    | 0.321917 | 0.927653 |
| gene3   | gene3   | recF      | gi 57650036 ref NC_002951.2 :3696-5051     | q1 | q2 | OK     | 283.877  | 134.218 | -1.08069    | 0.903289    | 0.366373 | 0.93284  |
| gene30  | gene30  | SACOL0029 | gi 57650036 ref NC_002951.2 :37284-37452   | q1 | q2 | OK     | 135.549  | 118.227 | -0.197265   | 0.086822    | 0.930813 | 0.987716 |
| gene300 | gene300 | nanA      | gi 57650036 ref NC_002951.2 :347116-347998 | q1 | q2 | OK     | 10.0573  | 30.8161 | 1.61544     | -0.91022    | 0.362709 | 0.93284  |
| gene301 | gene301 | SACOL0313 | gi 57650036 ref NC_002951.2 :348155-349016 | q1 | q2 | OK     | 18.0963  | 49.0567 | 1.43875     | -0.89099    | 0.372933 | 0.93722  |
| gene302 | gene302 | SACOL0314 | gi 57650036 ref NC_002951.2 :349293-350094 | q1 | q2 | OK     | 61.0402  | 58.7714 | -0.0546439  | 0.039595    | 0.968416 | 0.992211 |
| gene303 | gene303 | SACOL0315 | gi 57650036 ref NC_002951.2 :350233-350902 | q1 | q2 | OK     | 25.4175  | 37.1442 | 0.547314    | -0.31699    | 0.75125  | 0.978191 |
| gene304 | gene304 | SACOL0316 | gi 57650036 ref NC_002951.2 :351028-352342 | q1 | q2 | OK     | 1.56716  | 47.249  | 4.91406     | -2.77702    | 0.005486 | 0.446636 |
| gene305 | gene305 | SACOL0317 | gi 57650036 ref NC_002951.2 :352759-354694 | q1 | q2 | OK     | 15.2272  | 67.2189 | 2.14222     | -1.6529     | 0.098352 | 0.81189  |
| gene306 | gene306 | int       | gi 57650036 ref NC_002951.2 :354784-355990 | q1 | q2 | OK     | 5.65321  | 33.6537 | 2.57362     | -1.50178    | 0.133155 | 0.842707 |
| gene307 | gene307 | SACOL0319 | gi 57650036 ref NC_002951.2 :356183-356897 | q1 | q2 | OK     | 30.0543  | 34.5949 | 0.202987    | -0.12045    | 0.904129 | 0.984151 |
| gene308 | gene308 | SACOL0320 | gi 57650036 ref NC_002951.2 :356974-357202 | q1 | q2 | OK     | 27.3009  | 30.0983 | 0.140733    | -0.06181    | 0.950711 | 0.988316 |

|         |         |           |                                            |    |    |            |         |             |           |          |          |
|---------|---------|-----------|--------------------------------------------|----|----|------------|---------|-------------|-----------|----------|----------|
| gene309 | gene309 | SACOL0321 | gi 57650036 ref NC_002951.2 :357356-358076 | q1 | q2 | NOTEST 0   | 0       | 0           | 0         | 1        | 1        |
| gene31  | gene31  | SACOL0030 | gi 57650036 ref NC_002951.2 :37549-37780   | q1 | q2 | OK 0       | 6.12454 | 1.79769e+30 | 1.79769e+ | 0.209916 | 0.842707 |
| gene310 | gene310 | SACOL0322 | gi 57650036 ref NC_002951.2 :358217-358436 | q1 | q2 | NOTEST 0   | 0       | 0           | 0         | 1        | 1        |
| gene311 | gene311 | SACOL0323 | gi 57650036 ref NC_002951.2 :358450-358759 | q1 | q2 | NOTEST 0   | 0       | 0           | 0         | 1        | 1        |
| gene312 | gene312 | SACOL0324 | gi 57650036 ref NC_002951.2 :358762-358915 | q1 | q2 | NOTEST 0   | 0       | 0           | 0         | 1        | 1        |
| gene313 | gene313 | SACOL0325 | gi 57650036 ref NC_002951.2 :358915-359707 | q1 | q2 | NOTEST 0   | 0       | 0           | 0         | 1        | 1        |
| gene314 | gene314 | SACOL0326 | gi 57650036 ref NC_002951.2 :359707-359932 | q1 | q2 | NOTEST 0   | 0       | 0           | 0         | 1        | 1        |
| gene315 | gene315 | SACOL0327 | gi 57650036 ref NC_002951.2 :359971-360551 | q1 | q2 | NOTEST 0   | 0       | 0           | 0         | 1        | 1        |
| gene316 | gene316 | SACOL0328 | gi 57650036 ref NC_002951.2 :359971-360551 | q1 | q2 | NOTEST 0   | 0       | 0           | 0         | 1        | 1        |
| gene317 | gene317 | SACOL0329 | gi 57650036 ref NC_002951.2 :360604-361172 | q1 | q2 | NOTEST 0   | 0       | 0           | 0         | 1        | 1        |
| gene318 | gene318 | SACOL0330 | gi 57650036 ref NC_002951.2 :360604-361172 | q1 | q2 | NOTEST 0   | 0       | 0           | 0         | 1        | 1        |
| gene319 | gene319 | SACOL0331 | gi 57650036 ref NC_002951.2 :361219-361640 | q1 | q2 | NOTEST 0   | 0       | 0           | 0         | 1        | 1        |
| gene32  | gene32  | SACOL0031 | gi 57650036 ref NC_002951.2 :38328-39072   | q1 | q2 | OK 256.538 | 80.9241 | -1.66453    | 1.466     | 0.142648 | 0.842707 |
| gene320 | gene320 | SACOL0332 | gi 57650036 ref NC_002951.2 :361219-361640 | q1 | q2 | NOTEST 0   | 0       | 0           | 0         | 1        | 1        |
| gene321 | gene321 | SACOL0333 | gi 57650036 ref NC_002951.2 :361694-361958 | q1 | q2 | OK 10.2994 | 32.0806 | 1.63914     | -0.72214  | 0.470206 | 0.956269 |
| gene322 | gene322 | SACOL0334 | gi 57650036 ref NC_002951.2 :361970-362132 | q1 | q2 | NOTEST 0   | 0       | 0           | 0         | 1        | 1        |
| gene323 | gene323 | SACOL0335 | gi 57650036 ref NC_002951.2 :362221-362539 | q1 | q2 | OK 2.08313 | 34.3018 | 4.04146     | -1.77988  | 0.075096 | 0.754145 |
| gene324 | gene324 | SACOL0336 | gi 57650036 ref NC_002951.2 :362543-362804 | q1 | q2 | OK 0       | 5.31875 | 1.79769e+30 | 1.79769e+ | 0.20195  | 0.842707 |
| gene325 | gene325 | SACOL0337 | gi 57650036 ref NC_002951.2 :362813-364070 | q1 | q2 | NOTEST 0   | 0       | 0           | 0         | 1        | 1        |
| gene326 | gene326 | SACOL0338 | gi 57650036 ref NC_002951.2 :362813-364070 | q1 | q2 | NOTEST 0   | 0       | 0           | 0         | 1        | 1        |
| gene327 | gene327 | ssb1      | gi 57650036 ref NC_002951.2 :362813-364070 | q1 | q2 | NOTEST 0   | 0       | 0           | 0         | 1        | 1        |
| gene328 | gene328 | SACOL0340 | gi 57650036 ref NC_002951.2 :364083-367357 | q1 | q2 | OK 24.417  | 66.0595 | 1.43588     | -0.74205  | 0.458055 | 0.956269 |
| gene329 | gene329 | SACOL0341 | gi 57650036 ref NC_002951.2 :364083-367357 | q1 | q2 | OK 3.6994  | 30.4108 | 3.03922     | -0.8183   | 0.413184 | 0.94415  |
| gene33  | gene33  | maoC      | gi 57650036 ref NC_002951.2 :39168-39597   | q1 | q2 | OK 60.0694 | 34.3074 | -0.808111   | 0.443728  | 0.657239 | 0.978191 |
| gene330 | gene330 | SACOL0342 | gi 57650036 ref NC_002951.2 :364083-367357 | q1 | q2 | OK 3.11882 | 69.6599 | 4.48126     | -0.58866  | 0.55609  | 0.976548 |
| gene331 | gene331 | SACOL0343 | gi 57650036 ref NC_002951.2 :364083-367357 | q1 | q2 | OK 1.46821 | 50.3606 | 5.10016     | -1.26529  | 0.205766 | 0.842707 |
| gene332 | gene332 | SACOL0344 | gi 57650036 ref NC_002951.2 :364083-367357 | q1 | q2 | OK 0       | 13.5125 | 1.79769e+30 | 1.79769e+ | 0.446447 | 0.956269 |
| gene333 | gene333 | SACOL0345 | gi 57650036 ref NC_002951.2 :367359-367581 | q1 | q2 | OK 24.028  | 119.962 | 2.31979     | -1.0674   | 0.285791 | 0.921417 |
| gene334 | gene334 | SACOL0346 | gi 57650036 ref NC_002951.2 :367590-368417 | q1 | q2 | NOTEST 0   | 0       | 0           | 0         | 1        | 1        |
| gene335 | gene335 | SACOL0347 | gi 57650036 ref NC_002951.2 :367590-368417 | q1 | q2 | OK 1.16876 | 17.5791 | 3.91082     | -1.29002  | 0.197045 | 0.842707 |
| gene336 | gene336 | SACOL0348 | gi 57650036 ref NC_002951.2 :368421-368607 | q1 | q2 | OK 0       | 5.71726 | 1.79769e+30 | 1.79769e+ | 0.207933 | 0.842707 |
| gene337 | gene337 | SACOL0349 | gi 57650036 ref NC_002951.2 :368607-368865 | q1 | q2 | NOTEST 0   | 0       | 0           | 0         | 1        | 1        |
| gene338 | gene338 | SACOL0350 | gi 57650036 ref NC_002951.2 :368876-369233 | q1 | q2 | NOTEST 0   | 0       | 0           | 0         | 1        | 1        |

|         |         |           |                                            |    |    |        |         |         |             |           |          |          |
|---------|---------|-----------|--------------------------------------------|----|----|--------|---------|---------|-------------|-----------|----------|----------|
| gene339 | gene339 | SACOL0351 | gi 57650036 ref NC_002951.2 :369236-369479 | q1 | q2 | OK     | 4.41258 | 18.5819 | 2.0742      | -0.86591  | 0.386538 | 0.940893 |
| gene34  | gene34  | mecA      | gi 57650036 ref NC_002951.2 :39642-41649   | q1 | q2 | OK     | 530.598 | 423.241 | -0.326141   | 0.243826  | 0.807366 | 0.984151 |
| gene340 | gene340 | SACOL0352 | gi 57650036 ref NC_002951.2 :369492-369699 | q1 | q2 | OK     | 0       | 6.59303 | 1.79769e+30 | 1.79769e+ | 0.206623 | 0.842707 |
| gene341 | gene341 | SACOL0353 | gi 57650036 ref NC_002951.2 :369701-370981 | q1 | q2 | OK     | 1.18773 | 6.26088 | 2.39815     | -0.29813  | 0.765605 | 0.978191 |
| gene342 | gene342 | SACOL0354 | gi 57650036 ref NC_002951.2 :369701-370981 | q1 | q2 | OK     | 18.2509 | 164.764 | 3.17436     | -1.44899  | 0.147341 | 0.842707 |
| gene343 | gene343 | SACOL0355 | gi 57650036 ref NC_002951.2 :369701-370981 | q1 | q2 | OK     | 8.97928 | 156.94  | 4.12747     | -1.22125  | 0.221993 | 0.854056 |
| gene344 | gene344 | SACOL0356 | gi 57650036 ref NC_002951.2 :369701-370981 | q1 | q2 | OK     | 9.57206 | 120.301 | 3.65168     | -0.73826  | 0.460356 | 0.956269 |
| gene345 | gene345 | dut       | gi 57650036 ref NC_002951.2 :370985-371528 | q1 | q2 | OK     | 14.7101 | 84.1404 | 2.51599     | -1.42717  | 0.153531 | 0.842707 |
| gene346 | gene346 | SACOL0358 | gi 57650036 ref NC_002951.2 :371564-372307 | q1 | q2 | OK     | 7.89515 | 65.9303 | 3.0619      | -0.74181  | 0.458205 | 0.956269 |
| gene347 | gene347 | SACOL0359 | gi 57650036 ref NC_002951.2 :371564-372307 | q1 | q2 | NOTEST | 0       | 0       | 0           | 0         | 1        | 1        |
| gene348 | gene348 | SACOL0360 | gi 57650036 ref NC_002951.2 :371564-372307 | q1 | q2 | OK     | 8.39935 | 450.14  | 5.74395     | -2.01035  | 0.044394 | 0.650761 |
| gene349 | gene349 | SACOL0361 | gi 57650036 ref NC_002951.2 :371564-372307 | q1 | q2 | OK     | 0       | 51.651  | 1.79769e+30 | 1.79769e+ | 0.43258  | 0.956269 |
| gene35  | gene35  | mecR1     | gi 57650036 ref NC_002951.2 :41748-44481   | q1 | q2 | OK     | 198.103 | 73.0248 | -1.43979    | 1.26428   | 0.206128 | 0.842707 |
| gene350 | gene350 | SACOL0362 | gi 57650036 ref NC_002951.2 :372374-372882 | q1 | q2 | OK     | 0       | 19.1228 | 1.79769e+30 | 1.79769e+ | 0.377571 | 0.940261 |
| gene351 | gene351 | SACOL0363 | gi 57650036 ref NC_002951.2 :372374-372882 | q1 | q2 | OK     | 11.3734 | 31.3635 | 1.46342     | -0.58434  | 0.558993 | 0.976548 |
| gene352 | gene352 | SACOL0364 | gi 57650036 ref NC_002951.2 :372894-373332 | q1 | q2 | OK     | 2.97913 | 7.44712 | 1.32179     | -0.57479  | 0.565432 | 0.976548 |
| gene353 | gene353 | SACOL0365 | gi 57650036 ref NC_002951.2 :373488-373803 | q1 | q2 | OK     | 0       | 14.349  | 1.79769e+30 | 1.79769e+ | 0.17683  | 0.842707 |
| gene354 | gene354 | SACOL0366 | gi 57650036 ref NC_002951.2 :373931-375918 | q1 | q2 | OK     | 6.909   | 12.824  | 0.892303    | -0.15525  | 0.876627 | 0.984151 |
| gene355 | gene355 | SACOL0367 | gi 57650036 ref NC_002951.2 :373931-375918 | q1 | q2 | OK     | 4.80043 | 6.29928 | 0.392023    | -0.16799  | 0.866592 | 0.984151 |
| gene356 | gene356 | SACOL0368 | gi 57650036 ref NC_002951.2 :375922-377918 | q1 | q2 | OK     | 38.4967 | 51.6037 | 0.42274     | -0.33457  | 0.737952 | 0.978191 |
| gene357 | gene357 | SACOL0369 | gi 57650036 ref NC_002951.2 :375922-377918 | q1 | q2 | OK     | 7.76176 | 21.4378 | 1.4657      | -0.43797  | 0.661407 | 0.978191 |
| gene358 | gene358 | SACOL0370 | gi 57650036 ref NC_002951.2 :377929-379093 | q1 | q2 | OK     | 8.40425 | 34.8787 | 2.05316     | -1.23286  | 0.217627 | 0.850298 |
| gene359 | gene359 | SACOL0371 | gi 57650036 ref NC_002951.2 :379161-379440 | q1 | q2 | OK     | 14.7065 | 22.8951 | 0.638588    | -0.28512  | 0.775554 | 0.981122 |
| gene36  | gene36  | SACOL0035 | gi 57650036 ref NC_002951.2 :41748-44481   | q1 | q2 | NOTEST | 0       | 0       | 0           | 0         | 1        | 1        |
| gene360 | gene360 | SACOL0372 | gi 57650036 ref NC_002951.2 :379451-380182 | q1 | q2 | OK     | 0       | 25.2763 | 1.79769e+30 | 1.79769e+ | 0.261153 | 0.898005 |
| gene361 | gene361 | SACOL0373 | gi 57650036 ref NC_002951.2 :379451-380182 | q1 | q2 | OK     | 1.18773 | 39.0101 | 5.03756     | -1.89059  | 0.058679 | 0.702279 |
| gene362 | gene362 | SACOL0374 | gi 57650036 ref NC_002951.2 :380182-380578 | q1 | q2 | OK     | 6.13747 | 14.8542 | 1.27516     | -0.57799  | 0.563274 | 0.976548 |
| gene363 | gene363 | SACOL0375 | gi 57650036 ref NC_002951.2 :380612-381254 | q1 | q2 | OK     | 3.57366 | 77.2752 | 4.43453     | -2.37865  | 0.017376 | 0.500083 |
| gene364 | gene364 | SACOL0376 | gi 57650036 ref NC_002951.2 :381345-381801 | q1 | q2 | OK     | 21.0968 | 60.6781 | 1.52415     | -0.82319  | 0.410398 | 0.940909 |
| gene365 | gene365 | SACOL0377 | gi 57650036 ref NC_002951.2 :381858-382209 | q1 | q2 | OK     | 1.62477 | 50.1817 | 4.94885     | -2.24197  | 0.024964 | 0.598407 |
| gene366 | gene366 | SACOL0378 | gi 57650036 ref NC_002951.2 :382250-382409 | q1 | q2 | OK     | 0       | 122.43  | 1.79769e+30 | 1.79769e+ | 0.190047 | 0.842707 |
| gene367 | gene367 | SACOL0379 | gi 57650036 ref NC_002951.2 :382422-389447 | q1 | q2 | OK     | 3.07325 | 40.671  | 3.72616     | -2.3797   | 0.017327 | 0.500083 |
| gene368 | gene368 | SACOL0380 | gi 57650036 ref NC_002951.2 :382422-389447 | q1 | q2 | OK     | 2.48624 | 29.1101 | 3.54948     | -0.69072  | 0.489742 | 0.963286 |

|         |         |           |                                            |    |    |        |          |         |             |           |          |          |
|---------|---------|-----------|--------------------------------------------|----|----|--------|----------|---------|-------------|-----------|----------|----------|
| gene369 | gene369 | SACOL0381 | gi 57650036 ref NC_002951.2 :389455-391329 | q1 | q2 | OK     | 2.04121  | 22.3143 | 3.45047     | -1.88799  | 0.059028 | 0.702279 |
| gene37  | gene37  | SACOL0036 | gi 57650036 ref NC_002951.2 :41748-44481   | q1 | q2 | NOTEST | 0        | 0       | 0           | 0         | 1        | 1        |
| gene370 | gene370 | SACOL0382 | gi 57650036 ref NC_002951.2 :389455-391329 | q1 | q2 | OK     | 0        | 17.4927 | 1.79769e+30 | 1.79769e+ | 0.365609 | 0.93284  |
| gene371 | gene371 | SACOL0383 | gi 57650036 ref NC_002951.2 :391344-395267 | q1 | q2 | OK     | 1.39247  | 45.9646 | 5.04481     | -2.7676   | 0.005647 | 0.446636 |
| gene372 | gene372 | SACOL0384 | gi 57650036 ref NC_002951.2 :391344-395267 | q1 | q2 | OK     | 0.343581 | 12.2558 | 5.15667     | -1.21587  | 0.224033 | 0.854232 |
| gene373 | gene373 | SACOL0385 | gi 57650036 ref NC_002951.2 :391344-395267 | q1 | q2 | OK     | 0        | 14.2648 | 1.79769e+30 | 1.79769e+ | 0.36308  | 0.93284  |
| gene374 | gene374 | SACOL0386 | gi 57650036 ref NC_002951.2 :391344-395267 | q1 | q2 | OK     | 0        | 21.8615 | 1.79769e+30 | 1.79769e+ | 0.462729 | 0.956269 |
| gene375 | gene375 | SACOL0387 | gi 57650036 ref NC_002951.2 :395312-395612 | q1 | q2 | OK     | 0        | 11.6769 | 1.79769e+30 | 1.79769e+ | 0.18314  | 0.842707 |
| gene376 | gene376 | SACOL0388 | gi 57650036 ref NC_002951.2 :395747-396050 | q1 | q2 | OK     | 0        | 1.75212 | 1.79769e+30 | 1.79769e+ | 0.206623 | 0.842707 |
| gene377 | gene377 | SACOL0389 | gi 57650036 ref NC_002951.2 :396061-397516 | q1 | q2 | OK     | 1.04079  | 43.1753 | 5.37446     | -2.98826  | 0.002806 | 0.346711 |
| gene378 | gene378 | SACOL0390 | gi 57650036 ref NC_002951.2 :398285-398408 | q1 | q2 | NOTEST | 0        | 0       | 0           | 0         | 1        | 1        |
| gene379 | gene379 | SACOL0391 | gi 57650036 ref NC_002951.2 :398649-399477 | q1 | q2 | OK     | 9.54219  | 5.56577 | -0.777738   | 0.384615  | 0.700523 | 0.978191 |
| gene38  | gene38  | SACOL0037 | gi 57650036 ref NC_002951.2 :44616-45123   | q1 | q2 | NOTEST | 0        | 0       | 0           | 0         | 1        | 1        |
| gene380 | gene380 | SACOL0392 | gi 57650036 ref NC_002951.2 :399549-400749 | q1 | q2 | OK     | 10.5008  | 32.0869 | 1.61148     | -0.98416  | 0.325036 | 0.927653 |
| gene381 | gene381 | SACOL0393 | gi 57650036 ref NC_002951.2 :400844-400937 | q1 | q2 | NOTEST | 0        | 0       | 0           | 0         | 1        | 1        |
| gene382 | gene382 | SACOL0394 | gi 57650036 ref NC_002951.2 :401050-402052 | q1 | q2 | OK     | 13.9951  | 48.8664 | 1.80392     | -1.14258  | 0.253212 | 0.889805 |
| gene383 | gene383 | SACOL0395 | gi 57650036 ref NC_002951.2 :402085-402418 | q1 | q2 | OK     | 29.6215  | 48.4463 | 0.709739    | -0.35492  | 0.722651 | 0.978191 |
| gene384 | gene384 | SACOL0396 | gi 57650036 ref NC_002951.2 :402418-405153 | q1 | q2 | OK     | 11.4682  | 61.505  | 2.42307     | -1.04275  | 0.297062 | 0.924214 |
| gene385 | gene385 | SACOL0397 | gi 57650036 ref NC_002951.2 :402418-405153 | q1 | q2 | OK     | 12.7321  | 34.5053 | 1.43834     | -0.6607   | 0.508803 | 0.963286 |
| gene386 | gene386 | SACOL0398 | gi 57650036 ref NC_002951.2 :402418-405153 | q1 | q2 | OK     | 8.01616  | 24.7655 | 1.62735     | -0.63794  | 0.523514 | 0.963286 |
| gene387 | gene387 | SACOL0399 | gi 57650036 ref NC_002951.2 :405467-406493 | q1 | q2 | OK     | 59.364   | 44.2188 | -0.424928   | 0.329774  | 0.741571 | 0.978191 |
| gene388 | gene388 | ulaA      | gi 57650036 ref NC_002951.2 :406585-407932 | q1 | q2 | OK     | 9.50705  | 36.3831 | 1.9362      | -1.23447  | 0.21703  | 0.850298 |
| gene389 | gene389 | SACOL0401 | gi 57650036 ref NC_002951.2 :407946-408231 | q1 | q2 | OK     | 2.77767  | 44.1932 | 3.99188     | -1.7563   | 0.079038 | 0.758524 |
| gene39  | gene39  | SACOL0038 | gi 57650036 ref NC_002951.2 :45137-45449   | q1 | q2 | OK     | 0        | 16.311  | 1.79769e+30 | 1.79769e+ | 0.17457  | 0.842707 |
| gene390 | gene390 | SACOL0402 | gi 57650036 ref NC_002951.2 :408232-408676 | q1 | q2 | OK     | 1.93293  | 16.5735 | 3.10001     | -1.37911  | 0.167861 | 0.842707 |
| gene391 | gene391 | SACOL0403 | gi 57650036 ref NC_002951.2 :408680-410636 | q1 | q2 | OK     | 7.02809  | 23.531  | 1.74336     | -1.12402  | 0.261003 | 0.898005 |
| gene392 | gene392 | SACOL0404 | gi 57650036 ref NC_002951.2 :410847-411267 | q1 | q2 | OK     | 83.3144  | 27.151  | -1.61756    | 0.889661  | 0.373648 | 0.938071 |
| gene393 | gene393 | SACOL0405 | gi 57650036 ref NC_002951.2 :411373-412729 | q1 | q2 | OK     | 3.58397  | 59.7832 | 4.06011     | -2.49153  | 0.012719 | 0.500083 |
| gene394 | gene394 | SACOL0406 | gi 57650036 ref NC_002951.2 :412832-413273 | q1 | q2 | OK     | 21.5507  | 19.6284 | -0.134797   | 0.067161  | 0.946453 | 0.987716 |
| gene395 | gene395 | glpT      | gi 57650036 ref NC_002951.2 :413355-414714 | q1 | q2 | OK     | 110.621  | 53.075  | -1.05952    | 1.00598   | 0.314425 | 0.927653 |
| gene396 | gene396 | SACOL0408 | gi 57650036 ref NC_002951.2 :415021-415882 | q1 | q2 | OK     | 114.61   | 248.087 | 1.11411     | -1.06781  | 0.285605 | 0.921417 |
| gene397 | gene397 | SACOL0409 | gi 57650036 ref NC_002951.2 :415961-417023 | q1 | q2 | OK     | 74.3945  | 150.772 | 1.0191      | -0.96591  | 0.334088 | 0.927653 |
| gene398 | gene398 | SACOL0410 | gi 57650036 ref NC_002951.2 :417036-417603 | q1 | q2 | OK     | 116.309  | 84.3836 | -0.462931   | 0.336312  | 0.736635 | 0.978191 |

|         |         |           |                                            |    |    |          |         |         |           |          |          |          |
|---------|---------|-----------|--------------------------------------------|----|----|----------|---------|---------|-----------|----------|----------|----------|
| gene399 | gene399 | SACOL0411 | gi 57650036 ref NC_002951.2 :417662-418658 | q1 | q2 | OK       | 25.4422 | 38.1865 | 0.58584   | -0.37913 | 0.704593 | 0.978191 |
| gene4   | gene4   | gyrB      | gi 57650036 ref NC_002951.2 :5060-6995     | q1 | q2 | OK       | 189.216 | 138.658 | -0.448506 | 0.394972 | 0.692864 | 0.978191 |
| gene40  | gene40  | SACOL0039 | gi 57650036 ref NC_002951.2 :45450-45886   | q1 | q2 | NOTEST 0 |         | 0       | 0         | 0        | 1        | 1        |
| gene400 | gene400 | SACOL0412 | gi 57650036 ref NC_002951.2 :418755-419052 | q1 | q2 | OK       | 7.47369 | 43.3114 | 2.53485   | -1.14804 | 0.25095  | 0.889805 |
| gene401 | gene401 | SACOL0413 | gi 57650036 ref NC_002951.2 :419131-419677 | q1 | q2 | OK       | 42.3955 | 71.2341 | 0.748657  | -0.45664 | 0.647928 | 0.978191 |
| gene402 | gene402 | SACOL0414 | gi 57650036 ref NC_002951.2 :419944-423718 | q1 | q2 | OK       | 2.70641 | 27.3398 | 3.33655   | -0.98311 | 0.325556 | 0.927653 |
| gene403 | gene403 | SACOL0415 | gi 57650036 ref NC_002951.2 :419944-423718 | q1 | q2 | OK       | 1.48572 | 43.4735 | 4.8709    | -1.48479 | 0.1376   | 0.842707 |
| gene404 | gene404 | SACOL0416 | gi 57650036 ref NC_002951.2 :419944-423718 | q1 | q2 | OK       | 3.15516 | 34.6538 | 3.45723   | -1.70117 | 0.088912 | 0.775024 |
| gene405 | gene405 | SACOL0417 | gi 57650036 ref NC_002951.2 :423809-424466 | q1 | q2 | OK       | 33.0213 | 67.2593 | 1.02634   | -0.64509 | 0.518869 | 0.963286 |
| gene406 | gene406 | SACOL0418 | gi 57650036 ref NC_002951.2 :424527-424743 | q1 | q2 | OK       | 53.253  | 70.2648 | 0.399939  | -0.18395 | 0.854057 | 0.984151 |
| gene407 | gene407 | SACOL0419 | gi 57650036 ref NC_002951.2 :424851-425241 | q1 | q2 | OK       | 104.125 | 42.7943 | -1.28282  | 0.726435 | 0.467572 | 0.956269 |
| gene408 | gene408 | SACOL0420 | gi 57650036 ref NC_002951.2 :425481-426395 | q1 | q2 | OK       | 58.7954 | 21.2664 | -1.46713  | 0.187153 | 0.85154  | 0.984151 |
| gene409 | gene409 | SACOL0421 | gi 57650036 ref NC_002951.2 :425481-426395 | q1 | q2 | OK       | 9.58253 | 64.6169 | 2.75343   | -1.472   | 0.14102  | 0.842707 |
| gene41  | gene41  | SACOL0040 | gi 57650036 ref NC_002951.2 :45450-45886   | q1 | q2 | NOTEST 0 |         | 0       | 0         | 0        | 1        | 1        |
| gene410 | gene410 | SACOL0422 | gi 57650036 ref NC_002951.2 :426419-427891 | q1 | q2 | OK       | 8.96625 | 31.0363 | 1.79138   | -0.60995 | 0.541898 | 0.967731 |
| gene411 | gene411 | SACOL0424 | gi 57650036 ref NC_002951.2 :426419-427891 | q1 | q2 | OK       | 152.423 | 54.0795 | -1.49493  | 1.03691  | 0.299779 | 0.924214 |
| gene412 | gene412 | SACOL0425 | gi 57650036 ref NC_002951.2 :428257-429391 | q1 | q2 | OK       | 24.4012 | 41.3088 | 0.759498  | -0.51911 | 0.603688 | 0.978191 |
| gene413 | gene413 | SACOL0426 | gi 57650036 ref NC_002951.2 :429929-431111 | q1 | q2 | OK       | 102.523 | 41.4389 | -1.30689  | 1.12496  | 0.260605 | 0.898005 |
| gene414 | gene414 | SACOL0427 | gi 57650036 ref NC_002951.2 :431193-431946 | q1 | q2 | OK       | 18.1567 | 52.4189 | 1.52958   | -0.91806 | 0.358588 | 0.93284  |
| gene415 | gene415 | metE      | gi 57650036 ref NC_002951.2 :431988-438284 | q1 | q2 | OK       | 8.52118 | 30.9748 | 1.86197   | -0.99091 | 0.321732 | 0.927653 |
| gene416 | gene416 | SACOL0429 | gi 57650036 ref NC_002951.2 :431988-438284 | q1 | q2 | OK       | 6.33528 | 32.4691 | 2.35759   | -1.04148 | 0.297653 | 0.924214 |
| gene417 | gene417 | SACOL0430 | gi 57650036 ref NC_002951.2 :431988-438284 | q1 | q2 | OK       | 5.24098 | 33.9059 | 2.69363   | -0.85825 | 0.390754 | 0.940909 |
| gene418 | gene418 | SACOL0431 | gi 57650036 ref NC_002951.2 :431988-438284 | q1 | q2 | OK       | 2.42622 | 31.1878 | 3.6842    | -0.83947 | 0.401206 | 0.940909 |
| gene419 | gene419 | SACOL0432 | gi 57650036 ref NC_002951.2 :438947-439793 | q1 | q2 | OK       | 12.355  | 42.2032 | 1.77226   | -1.03592 | 0.300238 | 0.924214 |
| gene42  | gene42  | ccrB      | gi 57650036 ref NC_002951.2 :46351-47976   | q1 | q2 | NOTEST 0 |         | 0       | 0         | 0        | 1        | 1        |
| gene420 | gene420 | SACOL0433 | gi 57650036 ref NC_002951.2 :439949-440831 | q1 | q2 | OK       | 12.3283 | 36.7074 | 1.5741    | -0.91615 | 0.359587 | 0.93284  |
| gene421 | gene421 | SACOL0434 | gi 57650036 ref NC_002951.2 :440860-441064 | q1 | q2 | OK       | 83.9935 | 21.2664 | -1.9817   | 0.865421 | 0.386808 | 0.940893 |
| gene422 | gene422 | SACOL0435 | gi 57650036 ref NC_002951.2 :441075-442173 | q1 | q2 | OK       | 74.0188 | 46.8575 | -0.659613 | 0.55821  | 0.576701 | 0.976548 |
| gene423 | gene423 | SACOL0436 | gi 57650036 ref NC_002951.2 :442258-442450 | q1 | q2 | OK       | 785.834 | 136.632 | -2.52393  | 1.31262  | 0.189311 | 0.842707 |
| gene424 | gene424 | rpsF      | gi 57650036 ref NC_002951.2 :442693-442990 | q1 | q2 | OK       | 700.035 | 70.9569 | -3.30241  | 2.13832  | 0.032491 | 0.613628 |
| gene425 | gene425 | ssb2      | gi 57650036 ref NC_002951.2 :443010-443514 | q1 | q2 | OK       | 248.962 | 111.119 | -1.16382  | 0.946098 | 0.344099 | 0.93284  |
| gene426 | gene426 | rpsR      | gi 57650036 ref NC_002951.2 :443565-443808 | q1 | q2 | OK       | 1650.31 | 221.293 | -2.8987   | 2.03027  | 0.042329 | 0.649031 |
| gene427 | gene427 | SACOL0440 | gi 57650036 ref NC_002951.2 :444073-445012 | q1 | q2 | OK       | 5.67301 | 27.7953 | 2.29265   | -1.24533 | 0.21301  | 0.849656 |

|         |         |           |                                            |    |    |        |          |         |             |           |          |          |
|---------|---------|-----------|--------------------------------------------|----|----|--------|----------|---------|-------------|-----------|----------|----------|
| gene428 | gene428 | SACOL0441 | gi 57650036 ref NC_002951.2 :445050-445598 | q1 | q2 | OK     | 1.97506  | 117.688 | 5.89693     | -3.07387  | 0.002113 | 0.338293 |
| gene429 | gene429 | SACOL0442 | gi 57650036 ref NC_002951.2 :445957-446569 | q1 | q2 | OK     | 7.14937  | 30.0188 | 2.06998     | -1.06107  | 0.288658 | 0.921417 |
| gene43  | gene43  | ccrA1     | gi 57650036 ref NC_002951.2 :47997-49347   | q1 | q2 | NOTEST | 0        | 0       | 0           | 0         | 1        | 1        |
| gene430 | gene430 | SACOL0443 | gi 57650036 ref NC_002951.2 :446937-447306 | q1 | q2 | OK     | 0        | 31.1742 | 1.79769e+30 | 1.79769e+ | 0.149776 | 0.842707 |
| gene431 | gene431 | SACOL0444 | gi 57650036 ref NC_002951.2 :447486-448059 | q1 | q2 | OK     | 202.342  | 798.93  | 1.98127     | -1.78823  | 0.07374  | 0.754145 |
| gene432 | gene432 | SACOL0445 | gi 57650036 ref NC_002951.2 :448196-448460 | q1 | q2 | OK     | 484.072  | 57.745  | -3.06745    | 1.74017   | 0.08183  | 0.761588 |
| gene433 | gene433 | SACOL0446 | gi 57650036 ref NC_002951.2 :448759-449011 | q1 | q2 | OK     | 11954.2  | 4953.79 | -1.27091    | 1.01975   | 0.307846 | 0.927653 |
| gene434 | gene434 | SACOL0447 | gi 57650036 ref NC_002951.2 :449436-450018 | q1 | q2 | OK     | 41.1217  | 54.4954 | 0.406235    | -0.245    | 0.806455 | 0.984151 |
| gene435 | gene435 | SACOL0448 | gi 57650036 ref NC_002951.2 :450083-450467 | q1 | q2 | OK     | 117.027  | 56.1347 | -1.05988    | 0.61656   | 0.537525 | 0.964015 |
| gene436 | gene436 | SACOL0449 | gi 57650036 ref NC_002951.2 :450721-451348 | q1 | q2 | OK     | 118.08   | 71.5626 | -0.722482   | 0.541107  | 0.588434 | 0.978191 |
| gene437 | gene437 | SACOL0450 | gi 57650036 ref NC_002951.2 :451420-451714 | q1 | q2 | OK     | 71.6422  | 38.7868 | -0.885245   | 0.443266  | 0.657573 | 0.978191 |
| gene438 | gene438 | ahpF      | gi 57650036 ref NC_002951.2 :451792-453316 | q1 | q2 | OK     | 1369.28  | 1655.66 | 0.27399     | -0.19776  | 0.843236 | 0.984151 |
| gene439 | gene439 | ahpC      | gi 57650036 ref NC_002951.2 :453331-453901 | q1 | q2 | OK     | 1588.96  | 3275.02 | 1.04342     | -0.78748  | 0.431002 | 0.956269 |
| gene44  | gene44  | SACOL0043 | gi 57650036 ref NC_002951.2 :49534-51600   | q1 | q2 | NOTEST | 0        | 0       | 0           | 0         | 1        | 1        |
| gene440 | gene440 | SACOL0453 | gi 57650036 ref NC_002951.2 :454392-455148 | q1 | q2 | OK     | 239.12   | 395.415 | 0.725629    | -0.69016  | 0.490096 | 0.963286 |
| gene441 | gene441 | SACOL0454 | gi 57650036 ref NC_002951.2 :455228-456617 | q1 | q2 | OK     | 140.032  | 65.679  | -1.09226    | 1.05655   | 0.290717 | 0.923259 |
| gene442 | gene442 | SACOL0455 | gi 57650036 ref NC_002951.2 :457593-458550 | q1 | q2 | OK     | 186.984  | 132.472 | -0.497228   | 0.490458  | 0.62381  | 0.978191 |
| gene443 | gene443 | SACOL0456 | gi 57650036 ref NC_002951.2 :458667-459330 | q1 | q2 | OK     | 83.6134  | 145.814 | 0.802325    | -0.65726  | 0.511017 | 0.963286 |
| gene444 | gene444 | SACOL0457 | gi 57650036 ref NC_002951.2 :459472-459880 | q1 | q2 | OK     | 2896.59  | 1238.54 | -1.22571    | 1.01703   | 0.309139 | 0.927653 |
| gene445 | gene445 | xpt       | gi 57650036 ref NC_002951.2 :460391-462238 | q1 | q2 | OK     | 106.977  | 49.8436 | -1.10182    | 0.50185   | 0.615773 | 0.978191 |
| gene446 | gene446 | pbuX      | gi 57650036 ref NC_002951.2 :460391-462238 | q1 | q2 | OK     | 125.253  | 67.3911 | -0.894214   | 0.767726  | 0.44265  | 0.956269 |
| gene447 | gene447 | guaB      | gi 57650036 ref NC_002951.2 :462275-463742 | q1 | q2 | OK     | 310.254  | 120.173 | -1.36834    | 1.21883   | 0.222908 | 0.854232 |
| gene448 | gene448 | guaA      | gi 57650036 ref NC_002951.2 :463766-465308 | q1 | q2 | OK     | 599.628  | 118.361 | -2.34088    | 1.96522   | 0.049389 | 0.676522 |
| gene449 | gene449 | SACOL0462 | gi 57650036 ref NC_002951.2 :465420-465957 | q1 | q2 | OK     | 6.81415  | 27.4286 | 2.00907     | -0.99771  | 0.318419 | 0.927653 |
| gene45  | gene45  | SACOL0044 | gi 57650036 ref NC_002951.2 :49534-51600   | q1 | q2 | NOTEST | 0        | 0       | 0           | 0         | 1        | 1        |
| gene450 | gene450 | SACOL0463 | gi 57650036 ref NC_002951.2 :466349-467054 | q1 | q2 | OK     | 3.5497   | 30.1348 | 3.08566     | -1.56159  | 0.118385 | 0.840838 |
| gene451 | gene451 | SACOL0464 | gi 57650036 ref NC_002951.2 :467452-467725 | q1 | q2 | OK     | 0        | 19.7274 | 1.79769e+30 | 1.79769e+ | 0.177853 | 0.842707 |
| gene452 | gene452 | SACOL0465 | gi 57650036 ref NC_002951.2 :467985-468138 | q1 | q2 | OK     | 0        | 17.217  | 1.79769e+30 | 1.79769e+ | 0.207933 | 0.842707 |
| gene453 | gene453 | SACOL0466 | gi 57650036 ref NC_002951.2 :468661-469021 | q1 | q2 | OK     | 68.7778  | 74.4395 | 0.114126    | -0.06359  | 0.9493   | 0.987732 |
| gene454 | gene454 | SACOL0467 | gi 57650036 ref NC_002951.2 :469039-469885 | q1 | q2 | OK     | 92.6623  | 71.5065 | -0.373908   | 0.318979  | 0.749742 | 0.978191 |
| gene455 | gene455 | SACOL0468 | gi 57650036 ref NC_002951.2 :470356-471037 | q1 | q2 | OK     | 117.683  | 103.026 | -0.191896   | 0.164565  | 0.869287 | 0.984151 |
| gene456 | gene456 | SACOL0469 | gi 57650036 ref NC_002951.2 :471322-472018 | q1 | q2 | OK     | 3.16516  | 68.529  | 4.43636     | -2.37724  | 0.017443 | 0.500083 |
| gene457 | gene457 | SACOL0470 | gi 57650036 ref NC_002951.2 :472308-473367 | q1 | q2 | OK     | 0.511382 | 76.1868 | 7.219       | -3.82775  | 0.000129 | 0.14798  |



|         |         |           |                                            |    |    |        |          |          |             |             |          |          |
|---------|---------|-----------|--------------------------------------------|----|----|--------|----------|----------|-------------|-------------|----------|----------|
| gene458 | gene458 | SACOL0471 | gi 57650036 ref NC_002951.2 :473485-473623 | q1 | q2 | OK     | 0        | 34.2398  | 1.79769e+30 | 1.79769e+30 | 0.207933 | 0.842707 |
| gene459 | gene459 | SACOL0472 | gi 57650036 ref NC_002951.2 :473731-474658 | q1 | q2 | OK     | 0.91102  | 111.129  | 6.93053     | -3.76192    | 0.000169 | 0.14798  |
| gene46  | gene46  | SACOL0045 | gi 57650036 ref NC_002951.2 :51770-53348   | q1 | q2 | NOTEST | 0        | 0        | 0           | 0           | 1        | 1        |
| gene460 | gene460 | SACOL0473 | gi 57650036 ref NC_002951.2 :475037-475736 | q1 | q2 | OK     | 0.449313 | 26.1884  | 5.86507     | -2.72327    | 0.006464 | 0.461354 |
| gene461 | gene461 | SACOL0474 | gi 57650036 ref NC_002951.2 :476101-476785 | q1 | q2 | OK     | 2.31976  | 38.1401  | 4.03926     | -2.01845    | 0.043544 | 0.650674 |
| gene462 | gene462 | SACOL0475 | gi 57650036 ref NC_002951.2 :476869-476971 | q1 | q2 | NOTEST | 0        | 0        | 0           | 0           | 1        | 1        |
| gene463 | gene463 | hsdM1     | gi 57650036 ref NC_002951.2 :477048-479809 | q1 | q2 | OK     | 28.675   | 34.8208  | 0.280159    | -0.18304    | 0.854766 | 0.984151 |
| gene464 | gene464 | SACOL0477 | gi 57650036 ref NC_002951.2 :477048-479809 | q1 | q2 | OK     | 29.175   | 75.1255  | 1.36457     | -0.92889    | 0.352944 | 0.93284  |
| gene465 | gene465 | SACOL0478 | gi 57650036 ref NC_002951.2 :480191-480869 | q1 | q2 | OK     | 0        | 24.9527  | 1.79769e+30 | 1.79769e+30 | 0.12435  | 0.842707 |
| gene466 | gene466 | SACOL0479 | gi 57650036 ref NC_002951.2 :480890-482399 | q1 | q2 | OK     | 7.14563  | 27.5586  | 1.94737     | -1.19657    | 0.231473 | 0.863636 |
| gene467 | gene467 | SACOL0480 | gi 57650036 ref NC_002951.2 :482502-482811 | q1 | q2 | OK     | 3418.86  | 6559.75  | 0.940125    | -0.74925    | 0.453707 | 0.956269 |
| gene468 | gene468 | SACOL0481 | gi 57650036 ref NC_002951.2 :483148-483949 | q1 | q2 | OK     | 0.739881 | 10.9342  | 3.88541     | -1.76498    | 0.077567 | 0.758524 |
| gene469 | gene469 | SACOL0482 | gi 57650036 ref NC_002951.2 :483980-484772 | q1 | q2 | NOTEST | 0        | 0        | 0           | 0           | 1        | 1        |
| gene47  | gene47  | SACOL0046 | gi 57650036 ref NC_002951.2 :53427-54756   | q1 | q2 | NOTEST | 0        | 0        | 0           | 0           | 1        | 1        |
| gene470 | gene470 | SACOL0483 | gi 57650036 ref NC_002951.2 :484841-485618 | q1 | q2 | NOTEST | 0        | 0        | 0           | 0           | 1        | 1        |
| gene471 | gene471 | SACOL0484 | gi 57650036 ref NC_002951.2 :485793-486609 | q1 | q2 | NOTEST | 0        | 0.333602 | 1.79769e+30 | 1.79769e+30 | 0.206623 | 1        |
| gene472 | gene472 | SACOL0485 | gi 57650036 ref NC_002951.2 :486627-487413 | q1 | q2 | OK     | 7.59614  | 27.8401  | 1.87382     | -1.00375    | 0.315498 | 0.927653 |
| gene473 | gene473 | SACOL0486 | gi 57650036 ref NC_002951.2 :487592-490046 | q1 | q2 | OK     | 68.8695  | 117.261  | 0.767786    | -0.50182    | 0.615796 | 0.978191 |
| gene474 | gene474 | SACOL0487 | gi 57650036 ref NC_002951.2 :487592-490046 | q1 | q2 | OK     | 43.0154  | 57.0092  | 0.406342    | -0.26621    | 0.790075 | 0.982219 |
| gene475 | gene475 | SACOL0488 | gi 57650036 ref NC_002951.2 :487592-490046 | q1 | q2 | OK     | 77.4195  | 129.169  | 0.738493    | -0.22767    | 0.819901 | 0.984151 |
| gene476 | gene476 | SACOL0489 | gi 57650036 ref NC_002951.2 :490064-490379 | q1 | q2 | OK     | 168.666  | 62.1789  | -1.43968    | 0.808084    | 0.419042 | 0.949284 |
| gene477 | gene477 | SACOL0490 | gi 57650036 ref NC_002951.2 :490668-490929 | q1 | q2 | OK     | 28.3908  | 31.9125  | 0.168698    | -0.07731    | 0.938373 | 0.987716 |
| gene478 | gene478 | SACOL0491 | gi 57650036 ref NC_002951.2 :491047-492250 | q1 | q2 | OK     | 3.05336  | 67.5053  | 4.46653     | -2.6723     | 0.007533 | 0.480028 |
| gene479 | gene479 | nuoF      | gi 57650036 ref NC_002951.2 :493837-495322 | q1 | q2 | OK     | 10.6684  | 47.5344  | 2.15563     | -1.47989    | 0.138904 | 0.842707 |
| gene48  | gene48  | SACOL0047 | gi 57650036 ref NC_002951.2 :54774-55842   | q1 | q2 | NOTEST | 0        | 0        | 0           | 0           | 1        | 1        |
| gene480 | gene480 | SACOL0495 | gi 57650036 ref NC_002951.2 :495334-498040 | q1 | q2 | OK     | 23.7492  | 78.2053  | 1.71939     | -1.57933    | 0.11426  | 0.836663 |
| gene481 | gene481 | SACOL0496 | gi 57650036 ref NC_002951.2 :498201-498564 | q1 | q2 | OK     | 197.792  | 105.999  | -0.899932   | 0.573116    | 0.566566 | 0.976548 |
| gene482 | gene482 | SACOL0497 | gi 57650036 ref NC_002951.2 :498792-499140 | q1 | q2 | OK     | 48.116   | 60.6689  | 0.33444     | -0.17696    | 0.859544 | 0.984151 |
| gene483 | gene483 | SACOL0498 | gi 57650036 ref NC_002951.2 :499246-499921 | q1 | q2 | OK     | 24.1333  | 41.8413  | 0.793902    | -0.46376    | 0.642818 | 0.978191 |
| gene484 | gene484 | SACOL0499 | gi 57650036 ref NC_002951.2 :499957-500692 | q1 | q2 | OK     | 48.4513  | 58.5262  | 0.272547    | -0.18253    | 0.85517  | 0.984151 |
| gene485 | gene485 | SACOL0500 | gi 57650036 ref NC_002951.2 :500801-500918 | q1 | q2 | OK     | 0        | 772.664  | 1.79769e+30 | 1.79769e+30 | 0.200139 | 0.842707 |
| gene486 | gene486 | SACOL0501 | gi 57650036 ref NC_002951.2 :501147-502485 | q1 | q2 | OK     | 19.3593  | 36.9408  | 0.932188    | -0.64411    | 0.519504 | 0.963286 |
| gene487 | gene487 | SACOL0502 | gi 57650036 ref NC_002951.2 :502701-504742 | q1 | q2 | OK     | 136.244  | 72.8474  | -0.903247   | 0.417493    | 0.676318 | 0.978191 |

|         |         |            |                                            |    |    |          |         |         |           |          |          |          |
|---------|---------|------------|--------------------------------------------|----|----|----------|---------|---------|-----------|----------|----------|----------|
| gene488 | gene488 | SACOL0503  | gi 57650036 ref NC_002951.2 :502701-504742 | q1 | q2 | OK       | 372.193 | 69.7428 | -2.41593  | 1.75782  | 0.078777 | 0.758524 |
| gene489 | gene489 | SACOL0504  | gi 57650036 ref NC_002951.2 :505035-506061 | q1 | q2 | OK       | 67.6164 | 48.2273 | -0.487523 | 0.39607  | 0.692053 | 0.978191 |
| gene49  | gene49  | SACOL0048  | gi 57650036 ref NC_002951.2 :55980-56241   | q1 | q2 | NOTEST 0 |         | 0       | 0         | 0        | 1        | 1        |
| gene490 | gene490 | SACOL0505  | gi 57650036 ref NC_002951.2 :506064-506724 | q1 | q2 | OK       | 58.2465 | 47.1397 | -0.305228 | 0.195459 | 0.845033 | 0.984151 |
| gene491 | gene491 | SACOL0506  | gi 57650036 ref NC_002951.2 :506760-507603 | q1 | q2 | OK       | 266.229 | 68.9517 | -1.94901  | 1.70359  | 0.088457 | 0.775024 |
| gene492 | gene492 | SACOL0507  | gi 57650036 ref NC_002951.2 :507934-508939 | q1 | q2 | OK       | 911.658 | 428.558 | -1.089    | 0.868683 | 0.38502  | 0.940893 |
| gene493 | gene493 | SACOL0508  | gi 57650036 ref NC_002951.2 :509123-509393 | q1 | q2 | OK       | 512.033 | 39.5617 | -3.69406  | 2.07894  | 0.037622 | 0.634426 |
| gene494 | gene494 | SACOL0509  | gi 57650036 ref NC_002951.2 :509541-510412 | q1 | q2 | OK       | 24.5499 | 28.7181 | 0.226245  | -0.06496 | 0.948205 | 0.987716 |
| gene495 | gene495 | SACOL0510  | gi 57650036 ref NC_002951.2 :509541-510412 | q1 | q2 | OK       | 94.3431 | 54.3288 | -0.7962   | 0.458774 | 0.646396 | 0.978191 |
| gene496 | gene496 | SACOL0511  | gi 57650036 ref NC_002951.2 :510580-512472 | q1 | q2 | OK       | 43.1484 | 34.842  | -0.308479 | 0.173825 | 0.862003 | 0.984151 |
| gene497 | gene497 | SACOL0512  | gi 57650036 ref NC_002951.2 :510580-512472 | q1 | q2 | OK       | 25.4577 | 30.2047 | 0.246676  | -0.14707 | 0.883076 | 0.984151 |
| gene498 | gene498 | gltC       | gi 57650036 ref NC_002951.2 :512592-513477 | q1 | q2 | OK       | 3.55253 | 41.063  | 3.53092   | -1.90353 | 0.056972 | 0.696046 |
| gene499 | gene499 | gltB       | gi 57650036 ref NC_002951.2 :513657-518157 | q1 | q2 | OK       | 7.14281 | 59.0685 | 3.04783   | -2.34432 | 0.019062 | 0.51462  |
| gene5   | gene5   | gyrA       | gi 57650036 ref NC_002951.2 :7031-9695     | q1 | q2 | OK       | 184.423 | 78.7627 | -1.22743  | 1.0635   | 0.287553 | 0.921417 |
| gene50  | gene50  | SACOL0049  | gi 57650036 ref NC_002951.2 :56264-56996   | q1 | q2 | NOTEST 0 |         | 0       | 0         | 0        | 1        | 1        |
| gene500 | gene500 | gltD       | gi 57650036 ref NC_002951.2 :518174-519638 | q1 | q2 | OK       | 7.06045 | 46.005  | 2.70396   | -1.76125 | 0.078196 | 0.758524 |
| gene501 | gene501 | SACOL_tRNA | gi 57650036 ref NC_002951.2 :519906-519999 | q1 | q2 | NOTEST 0 |         | 0       | 0         | 0        | 1        | 1        |
| gene502 | gene502 | SACOL0516  | gi 57650036 ref NC_002951.2 :520469-521897 | q1 | q2 | OK       | 136.562 | 72.0203 | -0.923081 | 0.899156 | 0.36857  | 0.93284  |
| gene503 | gene503 | SACOL0517  | gi 57650036 ref NC_002951.2 :521960-523601 | q1 | q2 | OK       | 17.6321 | 54.6195 | 1.63121   | -1.24189 | 0.214278 | 0.850184 |
| gene504 | gene504 | SACOL0518  | gi 57650036 ref NC_002951.2 :523625-524354 | q1 | q2 | OK       | 19.4415 | 42.7331 | 1.13621   | -0.66577 | 0.50556  | 0.963286 |
| gene505 | gene505 | SACOL0519  | gi 57650036 ref NC_002951.2 :524992-525517 | q1 | q2 | OK       | 21.9628 | 24.687  | 0.168686  | -0.08859 | 0.929405 | 0.987716 |
| gene506 | gene506 | dnaX       | gi 57650036 ref NC_002951.2 :525585-527283 | q1 | q2 | OK       | 109.091 | 89.0258 | -0.29324  | 0.285795 | 0.775035 | 0.981122 |
| gene507 | gene507 | SACOL0521  | gi 57650036 ref NC_002951.2 :527372-527690 | q1 | q2 | OK       | 647.852 | 392.132 | -0.724326 | 0.648471 | 0.51668  | 0.963286 |
| gene508 | gene508 | recR       | gi 57650036 ref NC_002951.2 :527696-528293 | q1 | q2 | OK       | 470.215 | 90.5121 | -2.37714  | 1.96607  | 0.049291 | 0.676522 |
| gene509 | gene509 | rrsA       | gi 57650036 ref NC_002951.2 :529145-530700 | q1 | q2 | OK       | 13564.4 | 7000.1  | -0.954375 | 0.755912 | 0.449702 | 0.956269 |
| gene51  | gene51  | pls        | gi 57650036 ref NC_002951.2 :57211-61858   | q1 | q2 | NOTEST 0 |         | 0       | 0         | 0        | 1        | 1        |
| gene510 | gene510 | rrlA       | gi 57650036 ref NC_002951.2 :531064-533987 | q1 | q2 | OK       | 34074.4 | 18743.7 | -0.862281 | 0.91399  | 0.360722 | 0.93284  |
| gene511 | gene511 | rrfA       | gi 57650036 ref NC_002951.2 :534059-534174 | q1 | q2 | OK       | 45071.6 | 92577.3 | 1.03844   | -0.68515 | 0.493252 | 0.963286 |
| gene512 | gene512 | SACOL0523  | gi 57650036 ref NC_002951.2 :535056-536394 | q1 | q2 | OK       | 23.7679 | 31.0888 | 0.387382  | -0.2667  | 0.789698 | 0.982219 |
| gene513 | gene513 | tmk        | gi 57650036 ref NC_002951.2 :536395-537013 | q1 | q2 | OK       | 46.0349 | 40.2823 | -0.192579 | 0.115954 | 0.907689 | 0.984151 |
| gene514 | gene514 | SACOL0525  | gi 57650036 ref NC_002951.2 :537040-537370 | q1 | q2 | OK       | 1469.94 | 649.023 | -1.17942  | 1.15087  | 0.249785 | 0.889805 |
| gene515 | gene515 | SACOL0526  | gi 57650036 ref NC_002951.2 :537583-538510 | q1 | q2 | OK       | 92.3167 | 94.807  | 0.0384014 | -0.03599 | 0.971287 | 0.993606 |
| gene516 | gene516 | SACOL0527  | gi 57650036 ref NC_002951.2 :538510-539314 | q1 | q2 | OK       | 88.6948 | 106.604 | 0.26534   | -0.23575 | 0.813629 | 0.984151 |

|         |         |           |                                            |    |    |          |         |         |             |           |          |          |
|---------|---------|-----------|--------------------------------------------|----|----|----------|---------|---------|-------------|-----------|----------|----------|
| gene517 | gene517 | SACOL0528 | gi 57650036 ref NC_002951.2 :539330-539678 | q1 | q2 | OK       | 174.213 | 56.1986 | -1.63225    | 0.948302  | 0.342976 | 0.93284  |
| gene518 | gene518 | SACOL0529 | gi 57650036 ref NC_002951.2 :539951-540918 | q1 | q2 | OK       | 19.1325 | 49.7741 | 1.37937     | -0.70776  | 0.479093 | 0.956269 |
| gene519 | gene519 | SACOL0530 | gi 57650036 ref NC_002951.2 :539951-540918 | q1 | q2 | OK       | 12.2622 | 57.4004 | 2.22684     | -0.37666  | 0.706424 | 0.978191 |
| gene52  | gene52  | SACOL0051 | gi 57650036 ref NC_002951.2 :61981-63598   | q1 | q2 | NOTEST 0 |         | 0       | 0           | 0         | 1        | 1        |
| gene520 | gene520 | SACOL0531 | gi 57650036 ref NC_002951.2 :540919-541759 | q1 | q2 | OK       | 15.9406 | 38.0885 | 1.25665     | -0.74146  | 0.458412 | 0.956269 |
| gene521 | gene521 | SACOL0532 | gi 57650036 ref NC_002951.2 :541783-541939 | q1 | q2 | NOTEST 0 |         | 0       | 0           | 0         | 1        | 1        |
| gene522 | gene522 | metS      | gi 57650036 ref NC_002951.2 :542043-544017 | q1 | q2 | OK       | 55.1584 | 44.643  | -0.305148   | 0.299032  | 0.764916 | 0.978191 |
| gene523 | gene523 | SACOL0534 | gi 57650036 ref NC_002951.2 :544047-544821 | q1 | q2 | OK       | 90.8126 | 89.324  | -0.0238445  | 0.02025   | 0.983844 | 0.997969 |
| gene524 | gene524 | SACOL0535 | gi 57650036 ref NC_002951.2 :544987-545524 | q1 | q2 | OK       | 38.8407 | 59.3292 | 0.611173    | -0.36116  | 0.717979 | 0.978191 |
| gene525 | gene525 | ksgA      | gi 57650036 ref NC_002951.2 :545534-546428 | q1 | q2 | OK       | 39.8277 | 45.7413 | 0.199727    | -0.13524  | 0.892421 | 0.984151 |
| gene526 | gene526 | SACOL0537 | gi 57650036 ref NC_002951.2 :546527-546791 | q1 | q2 | OK       | 7154.65 | 3415.94 | -1.0666     | 0.898078  | 0.369144 | 0.932852 |
| gene527 | gene527 | ipk       | gi 57650036 ref NC_002951.2 :547100-547949 | q1 | q2 | OK       | 85.3868 | 90.8435 | 0.0893698   | -0.07899  | 0.937037 | 0.987716 |
| gene528 | gene528 | purR      | gi 57650036 ref NC_002951.2 :547962-548787 | q1 | q2 | OK       | 157.344 | 97.0336 | -0.697362   | 0.662138  | 0.507883 | 0.963286 |
| gene529 | gene529 | SACOL0540 | gi 57650036 ref NC_002951.2 :548803-549184 | q1 | q2 | OK       | 669.289 | 1115.16 | 0.73655     | -0.7039   | 0.481495 | 0.959525 |
| gene53  | gene53  | SACOL0052 | gi 57650036 ref NC_002951.2 :63757-65269   | q1 | q2 | NOTEST 0 |         | 0       | 0           | 0         | 1        | 1        |
| gene530 | gene530 | spoVG     | gi 57650036 ref NC_002951.2 :549255-549558 | q1 | q2 | OK       | 2647.01 | 2246.21 | -0.236868   | 0.212881  | 0.83142  | 0.984151 |
| gene531 | gene531 | SACOL0542 | gi 57650036 ref NC_002951.2 :549747-549879 | q1 | q2 | OK       | 0       | 48.2322 | 1.79769e+30 | 1.79769e+ | 0.207933 | 0.842707 |
| gene532 | gene532 | glmU      | gi 57650036 ref NC_002951.2 :549901-551254 | q1 | q2 | OK       | 102.698 | 72.1224 | -0.50989    | 0.501919  | 0.615724 | 0.978191 |
| gene533 | gene533 | prsA      | gi 57650036 ref NC_002951.2 :551400-552366 | q1 | q2 | OK       | 203.131 | 89.1428 | -1.18822    | 1.13962   | 0.254446 | 0.890115 |
| gene534 | gene534 | rplY      | gi 57650036 ref NC_002951.2 :552515-553169 | q1 | q2 | OK       | 2062.58 | 154.65  | -3.73737    | 3.10445   | 0.001906 | 0.338293 |
| gene535 | gene535 | pth       | gi 57650036 ref NC_002951.2 :553479-560527 | q1 | q2 | OK       | 83.1374 | 109.068 | 0.391658    | -0.08236  | 0.934357 | 0.987716 |
| gene536 | gene536 | mfd       | gi 57650036 ref NC_002951.2 :553479-560527 | q1 | q2 | OK       | 89.6472 | 53.8005 | -0.736637   | 0.407474  | 0.68366  | 0.978191 |
| gene537 | gene537 | SACOL0548 | gi 57650036 ref NC_002951.2 :553479-560527 | q1 | q2 | OK       | 77.3525 | 64.9092 | -0.253026   | 0.089451  | 0.928723 | 0.987716 |
| gene538 | gene538 | SACOL0549 | gi 57650036 ref NC_002951.2 :553479-560527 | q1 | q2 | OK       | 117.544 | 102.681 | -0.195026   | 0.07417   | 0.940875 | 0.987716 |
| gene539 | gene539 | SACOL0550 | gi 57650036 ref NC_002951.2 :553479-560527 | q1 | q2 | OK       | 68.6626 | 100.091 | 0.543719    | -0.04569  | 0.963557 | 0.989588 |
| gene54  | gene54  | SACOL0054 | gi 57650036 ref NC_002951.2 :65291-67344   | q1 | q2 | NOTEST 0 |         | 0       | 0           | 0         | 1        | 1        |
| gene540 | gene540 | SACOL0551 | gi 57650036 ref NC_002951.2 :560544-560937 | q1 | q2 | OK       | 181.007 | 114.501 | -0.660684   | 0.437835  | 0.661506 | 0.978191 |
| gene541 | gene541 | SACOL0552 | gi 57650036 ref NC_002951.2 :561041-561443 | q1 | q2 | OK       | 504.787 | 128.589 | -1.97291    | 1.54168   | 0.123151 | 0.842707 |
| gene542 | gene542 | SACOL0553 | gi 57650036 ref NC_002951.2 :561622-562918 | q1 | q2 | OK       | 16.333  | 28.2764 | 0.791804    | -0.50705  | 0.612122 | 0.978191 |
| gene543 | gene543 | hpt       | gi 57650036 ref NC_002951.2 :562922-563462 | q1 | q2 | OK       | 45.8978 | 39.6149 | -0.212383   | 0.12302   | 0.902092 | 0.984151 |
| gene544 | gene544 | SACOL0555 | gi 57650036 ref NC_002951.2 :563718-565812 | q1 | q2 | OK       | 482.164 | 269.114 | -0.841303   | 0.644553  | 0.519217 | 0.963286 |
| gene545 | gene545 | hslO      | gi 57650036 ref NC_002951.2 :566040-566922 | q1 | q2 | OK       | 95.7064 | 90.0312 | -0.0881907  | 0.08098   | 0.935458 | 0.987716 |
| gene546 | gene546 | cysK      | gi 57650036 ref NC_002951.2 :567100-568033 | q1 | q2 | OK       | 1069.22 | 366.199 | -1.54586    | 1.256     | 0.209114 | 0.842707 |

|         |         |            |                                            |    |    |        |         |         |            |          |          |          |
|---------|---------|------------|--------------------------------------------|----|----|--------|---------|---------|------------|----------|----------|----------|
| gene547 | gene547 | folP       | gi 57650036 ref NC_002951.2 :568248-569868 | q1 | q2 | OK     | 42.3233 | 106.944 | 1.33733    | -0.90455 | 0.365703 | 0.93284  |
| gene548 | gene548 | folB       | gi 57650036 ref NC_002951.2 :568248-569868 | q1 | q2 | OK     | 38.2062 | 38.5963 | 0.0146568  | -0.00404 | 0.996773 | 0.998672 |
| gene549 | gene549 | folK       | gi 57650036 ref NC_002951.2 :568248-569868 | q1 | q2 | OK     | 112.824 | 55.2722 | -1.02945   | 0.506832 | 0.612273 | 0.978191 |
| gene55  | gene55  | SACOL0057  | gi 57650036 ref NC_002951.2 :68406-68499   | q1 | q2 | NOTEST | 0       | 0       | 0          | 0        | 1        | 1        |
| gene550 | gene550 | SACOL0561  | gi 57650036 ref NC_002951.2 :570261-570354 | q1 | q2 | NOTEST | 0       | 0       | 0          | 0        | 1        | 1        |
| gene551 | gene551 | lysS       | gi 57650036 ref NC_002951.2 :570406-571894 | q1 | q2 | OK     | 292.431 | 93.2318 | -1.6492    | 1.48722  | 0.136958 | 0.842707 |
| gene552 | gene552 | rrfG       | gi 57650036 ref NC_002951.2 :572451-572566 | q1 | q2 | OK     | 95151.2 | 143284  | 0.59058    | -0.44745 | 0.654549 | 0.978191 |
| gene554 | gene554 | rrsB       | gi 57650036 ref NC_002951.2 :572775-574330 | q1 | q2 | OK     | 12940.6 | 6902.65 | -0.906683  | 0.714797 | 0.474734 | 0.956269 |
| gene555 | gene555 | SACOL_tRNA | gi 57650036 ref NC_002951.2 :574422-574499 | q1 | q2 | NOTEST | 0       | 0       | 0          | 0        | 1        | 1        |
| gene556 | gene556 | rrlB       | gi 57650036 ref NC_002951.2 :574666-577589 | q1 | q2 | OK     | 43064.9 | 19131.2 | -1.17058   | 1.63393  | 0.102274 | 0.815096 |
| gene557 | gene557 | rrfB       | gi 57650036 ref NC_002951.2 :577661-577776 | q1 | q2 | OK     | 85969.9 | 115434  | 0.425159   | -0.31202 | 0.755025 | 0.978191 |
| gene558 | gene558 | rrsC       | gi 57650036 ref NC_002951.2 :577987-579542 | q1 | q2 | OK     | 13472.1 | 7233.97 | -0.897119  | 0.712647 | 0.476064 | 0.956269 |
| gene559 | gene559 | rrlC       | gi 57650036 ref NC_002951.2 :579844-582767 | q1 | q2 | OK     | 33161.6 | 16420.7 | -1.014     | 1.05037  | 0.293548 | 0.924214 |
| gene56  | gene56  | SACOL0058  | gi 57650036 ref NC_002951.2 :68645-70391   | q1 | q2 | NOTEST | 0       | 0       | 0          | 0        | 1        | 1        |
| gene560 | gene560 | rrfC       | gi 57650036 ref NC_002951.2 :582839-582954 | q1 | q2 | OK     | 80127.3 | 83934.2 | 0.0669651  | -0.04658 | 0.962846 | 0.989588 |
| gene561 | gene561 | SACOL0563  | gi 57650036 ref NC_002951.2 :583478-584861 | q1 | q2 | OK     | 3.5005  | 27.4591 | 2.97165    | -1.68417 | 0.09215  | 0.784058 |
| gene562 | gene562 | SACOL0564  | gi 57650036 ref NC_002951.2 :584964-585852 | q1 | q2 | OK     | 192.899 | 57.0639 | -1.7572    | 1.49855  | 0.133991 | 0.842707 |
| gene563 | gene563 | SACOL0565  | gi 57650036 ref NC_002951.2 :585855-586416 | q1 | q2 | OK     | 287.392 | 86.001  | -1.74059   | 1.4043   | 0.16023  | 0.842707 |
| gene564 | gene564 | nupC       | gi 57650036 ref NC_002951.2 :586623-587838 | q1 | q2 | OK     | 177.968 | 37.5559 | -2.2445    | 1.87262  | 0.061121 | 0.708721 |
| gene565 | gene565 | ctsR       | gi 57650036 ref NC_002951.2 :587995-588457 | q1 | q2 | OK     | 101.071 | 124.422 | 0.299878   | -0.20266 | 0.8394   | 0.984151 |
| gene566 | gene566 | SACOL0568  | gi 57650036 ref NC_002951.2 :588475-590039 | q1 | q2 | OK     | 97.028  | 210.822 | 1.11955    | -0.66168 | 0.508179 | 0.963286 |
| gene567 | gene567 | SACOL0569  | gi 57650036 ref NC_002951.2 :588475-590039 | q1 | q2 | OK     | 75.4313 | 149.117 | 0.983213   | -0.74344 | 0.457218 | 0.956269 |
| gene568 | gene568 | clpC       | gi 57650036 ref NC_002951.2 :590052-592508 | q1 | q2 | OK     | 141.708 | 139.316 | -0.0245539 | 0.02112  | 0.98315  | 0.997969 |
| gene569 | gene569 | radA       | gi 57650036 ref NC_002951.2 :592994-594359 | q1 | q2 | OK     | 57.4527 | 84.078  | 0.549353   | -0.52663 | 0.598448 | 0.978191 |
| gene57  | gene57  | SACOL0059  | gi 57650036 ref NC_002951.2 :70484-70937   | q1 | q2 | OK     | 41.8092 | 32.825  | -0.349026  | 0.188738 | 0.850298 | 0.984151 |
| gene570 | gene570 | SACOL0573  | gi 57650036 ref NC_002951.2 :594383-595457 | q1 | q2 | OK     | 59.0275 | 25.7189 | -1.19856   | 0.85817  | 0.390798 | 0.940909 |
| gene571 | gene571 | gltX       | gi 57650036 ref NC_002951.2 :596013-597468 | q1 | q2 | OK     | 104.773 | 45.9983 | -1.18761   | 1.11298  | 0.265716 | 0.902533 |
| gene572 | gene572 | cysE       | gi 57650036 ref NC_002951.2 :597896-600319 | q1 | q2 | OK     | 218.504 | 155.24  | -0.493156  | 0.193558 | 0.846522 | 0.984151 |
| gene573 | gene573 | cysS       | gi 57650036 ref NC_002951.2 :597896-600319 | q1 | q2 | OK     | 308.596 | 114.977 | -1.42438   | 0.972283 | 0.33091  | 0.927653 |
| gene574 | gene574 | SACOL0577  | gi 57650036 ref NC_002951.2 :597896-600319 | q1 | q2 | OK     | 323.746 | 112.126 | -1.52974   | 0.430105 | 0.667119 | 0.978191 |
| gene575 | gene575 | SACOL0578  | gi 57650036 ref NC_002951.2 :600326-601597 | q1 | q2 | OK     | 324.854 | 82.9274 | -1.96987   | 1.36674  | 0.171706 | 0.842707 |
| gene576 | gene576 | SACOL0579  | gi 57650036 ref NC_002951.2 :600326-601597 | q1 | q2 | OK     | 444.216 | 90.416  | -2.29661   | 1.35973  | 0.173914 | 0.842707 |
| gene577 | gene577 | SACOL0580  | gi 57650036 ref NC_002951.2 :601677-602247 | q1 | q2 | OK     | 225.673 | 51.8199 | -2.12266   | 1.56016  | 0.118723 | 0.840841 |

|         |         |           |                                            |    |    |          |         |         |           |          |          |          |
|---------|---------|-----------|--------------------------------------------|----|----|----------|---------|---------|-----------|----------|----------|----------|
| gene578 | gene578 | secE      | gi 57650036 ref NC_002951.2 :602560-602743 | q1 | q2 | OK       | 351.197 | 93.0935 | -1.91553  | 0.906444 | 0.364701 | 0.93284  |
| gene579 | gene579 | nusG      | gi 57650036 ref NC_002951.2 :602755-603304 | q1 | q2 | OK       | 330.135 | 98.6227 | -1.74307  | 1.44593  | 0.148197 | 0.842707 |
| gene58  | gene58  | SACOL0061 | gi 57650036 ref NC_002951.2 :71151-72167   | q1 | q2 | NOTEST 0 |         | 0       | 0         | 0        | 1        | 1        |
| gene580 | gene580 | rplK      | gi 57650036 ref NC_002951.2 :603475-603907 | q1 | q2 | OK       | 641.238 | 106.768 | -2.58638  | 1.99876  | 0.045635 | 0.650761 |
| gene581 | gene581 | rplA      | gi 57650036 ref NC_002951.2 :604114-604807 | q1 | q2 | OK       | 1165.85 | 82.801  | -3.81559  | 2.98064  | 0.002876 | 0.346711 |
| gene582 | gene582 | rplJ      | gi 57650036 ref NC_002951.2 :605078-605579 | q1 | q2 | OK       | 319.363 | 95.9051 | -1.73552  | 1.37692  | 0.168536 | 0.842707 |
| gene583 | gene583 | rplL      | gi 57650036 ref NC_002951.2 :605621-605990 | q1 | q2 | OK       | 1543.84 | 81.6196 | -4.24146  | 2.95916  | 0.003085 | 0.349558 |
| gene584 | gene584 | SACOL0587 | gi 57650036 ref NC_002951.2 :606164-606773 | q1 | q2 | OK       | 72.6043 | 32.4601 | -1.16139  | 0.715413 | 0.474354 | 0.956269 |
| gene585 | gene585 | rpoB      | gi 57650036 ref NC_002951.2 :606987-610539 | q1 | q2 | OK       | 413.04  | 130.15  | -1.66611  | 1.27456  | 0.202466 | 0.842707 |
| gene586 | gene586 | rpoC      | gi 57650036 ref NC_002951.2 :610675-614299 | q1 | q2 | OK       | 512.717 | 111.955 | -2.19524  | 1.68975  | 0.091075 | 0.784058 |
| gene587 | gene587 | SACOL0590 | gi 57650036 ref NC_002951.2 :614435-614690 | q1 | q2 | OK       | 300.339 | 55.8742 | -2.42634  | 1.29708  | 0.194604 | 0.842707 |
| gene588 | gene588 | rpsL      | gi 57650036 ref NC_002951.2 :614787-615201 | q1 | q2 | OK       | 1560.12 | 184.938 | -3.07654  | 2.53299  | 0.01131  | 0.500083 |
| gene589 | gene589 | rpsG      | gi 57650036 ref NC_002951.2 :615266-615737 | q1 | q2 | OK       | 2363.33 | 176.595 | -3.74231  | 3.02857  | 0.002457 | 0.340313 |
| gene59  | gene59  | SACOL0062 | gi 57650036 ref NC_002951.2 :71151-72167   | q1 | q2 | NOTEST 0 |         | 0       | 0         | 0        | 1        | 1        |
| gene590 | gene590 | fusA      | gi 57650036 ref NC_002951.2 :615859-617941 | q1 | q2 | OK       | 1136.3  | 182.768 | -2.63626  | 2.04442  | 0.040912 | 0.643773 |
| gene591 | gene591 | tuf       | gi 57650036 ref NC_002951.2 :618157-619342 | q1 | q2 | OK       | 2226.03 | 370.358 | -2.58748  | 1.99592  | 0.045942 | 0.650761 |
| gene592 | gene592 | SACOL0595 | gi 57650036 ref NC_002951.2 :619623-620799 | q1 | q2 | OK       | 52.0329 | 81.9958 | 0.656125  | -0.58866 | 0.55609  | 0.976548 |
| gene593 | gene593 | SACOL0596 | gi 57650036 ref NC_002951.2 :620969-622157 | q1 | q2 | OK       | 493.257 | 288.236 | -0.775088 | 0.647163 | 0.517526 | 0.963286 |
| gene594 | gene594 | SACOL0597 | gi 57650036 ref NC_002951.2 :622422-623301 | q1 | q2 | OK       | 1414.79 | 886.744 | -0.673999 | 0.509973 | 0.61007  | 0.978191 |
| gene595 | gene595 | SACOL0598 | gi 57650036 ref NC_002951.2 :623460-625098 | q1 | q2 | OK       | 24.3144 | 49.9412 | 1.03842   | -0.83884 | 0.401561 | 0.940909 |
| gene596 | gene596 | SACOL0599 | gi 57650036 ref NC_002951.2 :625311-626277 | q1 | q2 | OK       | 154.794 | 77.8145 | -0.992236 | 0.939523 | 0.347463 | 0.93284  |
| gene597 | gene597 | ilvE      | gi 57650036 ref NC_002951.2 :626611-627834 | q1 | q2 | OK       | 268.069 | 195.138 | -0.458107 | 0.404982 | 0.685491 | 0.978191 |
| gene598 | gene598 | SACOL0601 | gi 57650036 ref NC_002951.2 :626611-627834 | q1 | q2 | OK       | 36.8104 | 56.6759 | 0.622623  | -0.02941 | 0.97654  | 0.996166 |
| gene599 | gene599 | SACOL0602 | gi 57650036 ref NC_002951.2 :627937-628621 | q1 | q2 | OK       | 169.806 | 90.1876 | -0.912889 | 0.797673 | 0.42506  | 0.951235 |
| gene6   | gene6   | SACOL0007 | gi 57650036 ref NC_002951.2 :9781-10483    | q1 | q2 | OK       | 66.9743 | 51.6675 | -0.374351 | 0.252995 | 0.800272 | 0.984151 |
| gene60  | gene60  | SACOL0063 | gi 57650036 ref NC_002951.2 :72303-73371   | q1 | q2 | NOTEST 0 |         | 0       | 0         | 0        | 1        | 1        |
| gene600 | gene600 | SACOL0603 | gi 57650036 ref NC_002951.2 :628736-630009 | q1 | q2 | OK       | 84.5857 | 47.725  | -0.825667 | 0.530527 | 0.595746 | 0.978191 |
| gene601 | gene601 | SACOL0604 | gi 57650036 ref NC_002951.2 :628736-630009 | q1 | q2 | OK       | 17.3308 | 27.9064 | 0.687263  | -0.24434 | 0.806968 | 0.984151 |
| gene602 | gene602 | SACOL0605 | gi 57650036 ref NC_002951.2 :630075-630545 | q1 | q2 | OK       | 21.642  | 44.4861 | 1.03952   | -0.55404 | 0.579554 | 0.976548 |
| gene603 | gene603 | SACOL0606 | gi 57650036 ref NC_002951.2 :630692-631562 | q1 | q2 | OK       | 22.8011 | 29.9708 | 0.394451  | -0.2366  | 0.812965 | 0.984151 |
| gene604 | gene604 | SACOL0607 | gi 57650036 ref NC_002951.2 :631582-632149 | q1 | q2 | OK       | 93.9182 | 43.4287 | -1.11276  | 0.71155  | 0.476744 | 0.956269 |
| gene605 | gene605 | sdrC      | gi 57650036 ref NC_002951.2 :632578-635422 | q1 | q2 | OK       | 5.46158 | 42.7911 | 2.96992   | -2.09997 | 0.035731 | 0.626017 |
| gene606 | gene606 | sdrD      | gi 57650036 ref NC_002951.2 :635788-639934 | q1 | q2 | OK       | 18.8968 | 49.7377 | 1.3962    | -1.32585 | 0.18489  | 0.842707 |

|         |         |           |                                            |    |    |        |         |         |             |           |          |          |
|---------|---------|-----------|--------------------------------------------|----|----|--------|---------|---------|-------------|-----------|----------|----------|
| gene607 | gene607 | sdrE      | gi 57650036 ref NC_002951.2 :640327-643828 | q1 | q2 | OK     | 67.1955 | 55.6488 | -0.272015   | 0.254865  | 0.798828 | 0.984151 |
| gene608 | gene608 | SACOL0611 | gi 57650036 ref NC_002951.2 :643946-645419 | q1 | q2 | OK     | 29.577  | 28.1637 | -0.0706419  | 0.051692  | 0.958774 | 0.989588 |
| gene609 | gene609 | SACOL0612 | gi 57650036 ref NC_002951.2 :645542-647033 | q1 | q2 | OK     | 112.077 | 77.9995 | -0.522959   | 0.515043  | 0.606523 | 0.978191 |
| gene61  | gene61  | SACOL0064 | gi 57650036 ref NC_002951.2 :73401-74736   | q1 | q2 | NOTEST | 0       | 0       | 0           | 0         | 1        | 1        |
| gene610 | gene610 | SACOL0613 | gi 57650036 ref NC_002951.2 :647314-648193 | q1 | q2 | OK     | 264.316 | 104.376 | -1.34047    | 1.28189   | 0.199883 | 0.842707 |
| gene611 | gene611 | SACOL0614 | gi 57650036 ref NC_002951.2 :648205-648871 | q1 | q2 | OK     | 76.2868 | 65.5698 | -0.218403   | 0.15281   | 0.878548 | 0.984151 |
| gene612 | gene612 | SACOL0615 | gi 57650036 ref NC_002951.2 :648884-649247 | q1 | q2 | OK     | 262.225 | 137.623 | -0.930078   | 0.639323  | 0.522613 | 0.963286 |
| gene613 | gene613 | nagB      | gi 57650036 ref NC_002951.2 :649522-650281 | q1 | q2 | OK     | 19.5491 | 38.4925 | 0.977476    | -0.57303  | 0.566623 | 0.976548 |
| gene614 | gene614 | SACOL0617 | gi 57650036 ref NC_002951.2 :650357-650990 | q1 | q2 | OK     | 260.351 | 266.72  | 0.0348662   | -0.03454  | 0.972447 | 0.993959 |
| gene615 | gene615 | SACOL0618 | gi 57650036 ref NC_002951.2 :650991-651540 | q1 | q2 | OK     | 584.793 | 237.906 | -1.29754    | 1.25019   | 0.211229 | 0.846615 |
| gene616 | gene616 | SACOL0619 | gi 57650036 ref NC_002951.2 :651643-652300 | q1 | q2 | OK     | 5.4214  | 46.1016 | 3.08808     | -1.62715  | 0.103705 | 0.816291 |
| gene617 | gene617 | proP      | gi 57650036 ref NC_002951.2 :652801-654202 | q1 | q2 | OK     | 430.511 | 251.631 | -0.774739   | 0.640242  | 0.522015 | 0.963286 |
| gene618 | gene618 | SACOL0621 | gi 57650036 ref NC_002951.2 :654745-656122 | q1 | q2 | OK     | 2.40754 | 31.6658 | 3.71729     | -2.08734  | 0.036857 | 0.634426 |
| gene619 | gene619 | atoB      | gi 57650036 ref NC_002951.2 :656123-657603 | q1 | q2 | OK     | 6.99272 | 62.4576 | 3.15895     | -1.56856  | 0.11675  | 0.838847 |
| gene62  | gene62  | SACOL0065 | gi 57650036 ref NC_002951.2 :74754-75948   | q1 | q2 | NOTEST | 0       | 0       | 0           | 0         | 1        | 1        |
| gene620 | gene620 | SACOL0623 | gi 57650036 ref NC_002951.2 :656123-657603 | q1 | q2 | OK     | 0       | 39.1724 | 1.79769e+30 | 1.79769e+ | 0.265991 | 0.902533 |
| gene621 | gene621 | SACOL0624 | gi 57650036 ref NC_002951.2 :657605-657875 | q1 | q2 | OK     | 19.322  | 49.1524 | 1.34702     | -0.62483  | 0.532086 | 0.963286 |
| gene622 | gene622 | SACOL0625 | gi 57650036 ref NC_002951.2 :658075-658243 | q1 | q2 | OK     | 248.507 | 98.5221 | -1.33477    | 0.596961  | 0.550533 | 0.974772 |
| gene623 | gene623 | thiD1     | gi 57650036 ref NC_002951.2 :658749-659580 | q1 | q2 | OK     | 144.536 | 89.2921 | -0.694824   | 0.648663  | 0.516556 | 0.963286 |
| gene624 | gene624 | ung       | gi 57650036 ref NC_002951.2 :659763-660420 | q1 | q2 | OK     | 61.6068 | 44.0972 | -0.482404   | 0.308197  | 0.757932 | 0.978191 |
| gene625 | gene625 | SACOL0628 | gi 57650036 ref NC_002951.2 :660420-660801 | q1 | q2 | OK     | 72.2832 | 49.5272 | -0.545441   | 0.301253  | 0.763221 | 0.978191 |
| gene626 | gene626 | SACOL0629 | gi 57650036 ref NC_002951.2 :660933-661302 | q1 | q2 | OK     | 54.7767 | 56.1135 | 0.0347847   | -0.01881  | 0.984996 | 0.997969 |
| gene627 | gene627 | SACOL0630 | gi 57650036 ref NC_002951.2 :661422-662907 | q1 | q2 | OK     | 335.122 | 310.677 | -0.10927    | 0.089328  | 0.928822 | 0.987716 |
| gene628 | gene628 | SACOL0631 | gi 57650036 ref NC_002951.2 :663048-663501 | q1 | q2 | OK     | 23.2273 | 58.616  | 1.33547     | -0.72288  | 0.469751 | 0.956269 |
| gene629 | gene629 | SACOL0632 | gi 57650036 ref NC_002951.2 :663513-664278 | q1 | q2 | OK     | 49.7119 | 46.2593 | -0.10385    | 0.068463  | 0.945417 | 0.987716 |
| gene63  | gene63  | SACOL0066 | gi 57650036 ref NC_002951.2 :76214-76316   | q1 | q2 | NOTEST | 0       | 0       | 0           | 0         | 1        | 1        |
| gene630 | gene630 | SACOL0633 | gi 57650036 ref NC_002951.2 :664826-665579 | q1 | q2 | OK     | 405.096 | 202.452 | -1.00069    | 0.958719  | 0.3377   | 0.93058  |
| gene631 | gene631 | eutD      | gi 57650036 ref NC_002951.2 :665746-666733 | q1 | q2 | OK     | 206.217 | 75.2576 | -1.45426    | 1.36096   | 0.173525 | 0.842707 |
| gene632 | gene632 | SACOL0635 | gi 57650036 ref NC_002951.2 :666735-667572 | q1 | q2 | OK     | 242.716 | 64.7405 | -1.90653    | 1.64145   | 0.100704 | 0.815096 |
| gene633 | gene633 | mvk       | gi 57650036 ref NC_002951.2 :668158-669079 | q1 | q2 | OK     | 52.9875 | 74.2585 | 0.486905    | -0.3869   | 0.698829 | 0.978191 |
| gene634 | gene634 | mvaD      | gi 57650036 ref NC_002951.2 :669083-670067 | q1 | q2 | OK     | 104.499 | 80.2852 | -0.380276   | 0.359892  | 0.718928 | 0.978191 |
| gene635 | gene635 | SACOL0638 | gi 57650036 ref NC_002951.2 :670079-671156 | q1 | q2 | OK     | 109.13  | 66.7392 | -0.709439   | 0.667859  | 0.504223 | 0.963286 |
| gene636 | gene636 | SACOL0639 | gi 57650036 ref NC_002951.2 :671332-671674 | q1 | q2 | OK     | 22.5136 | 34.4549 | 0.613908    | -0.29877  | 0.765114 | 0.978191 |

|         |         |           |                                            |    |    |          |         |         |             |             |          |          |
|---------|---------|-----------|--------------------------------------------|----|----|----------|---------|---------|-------------|-------------|----------|----------|
| gene637 | gene637 | SACOL0640 | gi 57650036 ref NC_002951.2 :671726-673476 | q1 | q2 | OK       | 19.2349 | 36.4077 | 0.920519    | -0.59824    | 0.549677 | 0.974547 |
| gene638 | gene638 | SACOL0641 | gi 57650036 ref NC_002951.2 :671726-673476 | q1 | q2 | OK       | 3.91832 | 30.2604 | 2.94913     | -0.48366    | 0.628624 | 0.978191 |
| gene639 | gene639 | SACOL0642 | gi 57650036 ref NC_002951.2 :673533-673635 | q1 | q2 | NOTEST 0 |         | 0       | 0           | 0           | 1        | 1        |
| gene64  | gene64  | SACOL0067 | gi 57650036 ref NC_002951.2 :76614-77547   | q1 | q2 | OK       | 25.5939 | 58.2878 | 1.18739     | -0.80619    | 0.420136 | 0.949284 |
| gene640 | gene640 | SACOL0643 | gi 57650036 ref NC_002951.2 :674100-675510 | q1 | q2 | OK       | 16.7441 | 44.3279 | 1.40456     | -0.9974     | 0.318571 | 0.927653 |
| gene641 | gene641 | SACOL0644 | gi 57650036 ref NC_002951.2 :675513-676140 | q1 | q2 | OK       | 6.88357 | 19.02   | 1.46629     | -0.73168    | 0.464365 | 0.956269 |
| gene642 | gene642 | SACOL0645 | gi 57650036 ref NC_002951.2 :676265-676907 | q1 | q2 | OK       | 6.6368  | 24.8385 | 1.90402     | -0.96826    | 0.332913 | 0.927653 |
| gene643 | gene643 | SACOL0646 | gi 57650036 ref NC_002951.2 :676994-677612 | q1 | q2 | OK       | 12.4565 | 28.1491 | 1.17619     | -0.62165    | 0.534175 | 0.963286 |
| gene644 | gene644 | SACOL0647 | gi 57650036 ref NC_002951.2 :677686-678316 | q1 | q2 | OK       | 9.46074 | 35.8956 | 1.92378     | -1.02032    | 0.307575 | 0.927653 |
| gene645 | gene645 | SACOL0648 | gi 57650036 ref NC_002951.2 :678511-679132 | q1 | q2 | OK       | 6.98748 | 16.3883 | 1.22982     | -0.60773    | 0.543366 | 0.968963 |
| gene646 | gene646 | SACOL0649 | gi 57650036 ref NC_002951.2 :679262-679904 | q1 | q2 | OK       | 5.61576 | 33.118  | 2.56006     | -1.3146     | 0.188643 | 0.842707 |
| gene647 | gene647 | SACOL0650 | gi 57650036 ref NC_002951.2 :679950-680580 | q1 | q2 | OK       | 7.88395 | 26.9217 | 1.77178     | -0.91152    | 0.36202  | 0.93284  |
| gene648 | gene648 | SACOL0651 | gi 57650036 ref NC_002951.2 :681032-681662 | q1 | q2 | OK       | 1.05119 | 22.6709 | 4.43074     | -2.05518    | 0.039862 | 0.641477 |
| gene649 | gene649 | SACOL0652 | gi 57650036 ref NC_002951.2 :681776-682427 | q1 | q2 | OK       | 1.99909 | 24.5867 | 3.62046     | -1.73687    | 0.08241  | 0.763748 |
| gene65  | gene65  | SACOL0068 | gi 57650036 ref NC_002951.2 :77909-78113   | q1 | q2 | OK       | 0       | 10.6332 | 1.79769e+30 | 1.79769e+30 | 0.209916 | 0.842707 |
| gene650 | gene650 | SACOL0653 | gi 57650036 ref NC_002951.2 :682463-683099 | q1 | q2 | OK       | 5.69746 | 35.1875 | 2.62667     | -1.35309    | 0.176028 | 0.842707 |
| gene651 | gene651 | SACOL0654 | gi 57650036 ref NC_002951.2 :683333-683960 | q1 | q2 | OK       | 5.82456 | 23.0617 | 1.98528     | -0.99388    | 0.320283 | 0.927653 |
| gene652 | gene652 | SACOL0655 | gi 57650036 ref NC_002951.2 :684229-685168 | q1 | q2 | OK       | 332.618 | 181.019 | -0.877727   | 0.828826    | 0.407203 | 0.940909 |
| gene653 | gene653 | SACOL0656 | gi 57650036 ref NC_002951.2 :685378-685915 | q1 | q2 | OK       | 1452.78 | 350.31  | -2.05211    | 1.81074     | 0.070181 | 0.754145 |
| gene654 | gene654 | SACOL0657 | gi 57650036 ref NC_002951.2 :686083-686560 | q1 | q2 | OK       | 66.5158 | 49.8885 | -0.414989   | 0.244263    | 0.807027 | 0.984151 |
| gene655 | gene655 | SACOL0658 | gi 57650036 ref NC_002951.2 :686599-687895 | q1 | q2 | OK       | 112.738 | 66.2312 | -0.767388   | 0.746501    | 0.455365 | 0.956269 |
| gene656 | gene656 | SACOL0659 | gi 57650036 ref NC_002951.2 :687922-688444 | q1 | q2 | OK       | 348.488 | 97.1303 | -1.84311    | 1.49279     | 0.135491 | 0.842707 |
| gene657 | gene657 | adhP      | gi 57650036 ref NC_002951.2 :688942-689953 | q1 | q2 | OK       | 18.4469 | 46.9326 | 1.34721     | -0.87483    | 0.381665 | 0.940893 |
| gene658 | gene658 | SACOL0661 | gi 57650036 ref NC_002951.2 :690027-690135 | q1 | q2 | NOTEST 0 |         | 0       | 0           | 0           | 1        | 1        |
| gene659 | gene659 | SACOL0662 | gi 57650036 ref NC_002951.2 :690215-692302 | q1 | q2 | OK       | 82.8543 | 82.7665 | -0.00152942 | 0.000533    | 0.999575 | 0.99997  |
| gene66  | gene66  | SACOL0069 | gi 57650036 ref NC_002951.2 :78161-78458   | q1 | q2 | OK       | 0       | 2.76456 | 1.79769e+30 | 1.79769e+30 | 0.209916 | 0.842707 |
| gene660 | gene660 | argS      | gi 57650036 ref NC_002951.2 :690215-692302 | q1 | q2 | OK       | 113.455 | 52.2017 | -1.11995    | 1.00063     | 0.317006 | 0.927653 |
| gene661 | gene661 | SACOL0664 | gi 57650036 ref NC_002951.2 :692690-693326 | q1 | q2 | OK       | 23.3078 | 33.3232 | 0.515718    | -0.29038    | 0.771527 | 0.980274 |
| gene662 | gene662 | SACOL0665 | gi 57650036 ref NC_002951.2 :693704-694592 | q1 | q2 | OK       | 54.3333 | 38.9413 | -0.480537   | 0.332862    | 0.739238 | 0.978191 |
| gene663 | gene663 | SACOL0666 | gi 57650036 ref NC_002951.2 :694739-695690 | q1 | q2 | OK       | 29.9527 | 37.9482 | 0.341344    | -0.22153    | 0.824682 | 0.984151 |
| gene664 | gene664 | SACOL0667 | gi 57650036 ref NC_002951.2 :695744-697248 | q1 | q2 | OK       | 33.9941 | 28.5072 | -0.253959   | 0.121513    | 0.903285 | 0.984151 |
| gene665 | gene665 | SACOL0668 | gi 57650036 ref NC_002951.2 :695744-697248 | q1 | q2 | OK       | 44.7628 | 52.1084 | 0.219216    | -0.14024    | 0.888469 | 0.984151 |
| gene666 | gene666 | SACOL0669 | gi 57650036 ref NC_002951.2 :697383-697890 | q1 | q2 | OK       | 427.888 | 139.405 | -1.61795    | 1.42637     | 0.15376  | 0.842707 |

|         |         |           |                                            |    |    |          |         |         |             |           |          |          |
|---------|---------|-----------|--------------------------------------------|----|----|----------|---------|---------|-------------|-----------|----------|----------|
| gene667 | gene667 | SACOL0670 | gi 57650036 ref NC_002951.2 :698051-698768 | q1 | q2 | OK       | 85.2855 | 62.0794 | -0.458187   | 0.337925  | 0.73542  | 0.978191 |
| gene668 | gene668 | SACOL0671 | gi 57650036 ref NC_002951.2 :698936-699725 | q1 | q2 | OK       | 624.49  | 497.771 | -0.327198   | 0.279688  | 0.779717 | 0.982219 |
| gene669 | gene669 | sarA      | gi 57650036 ref NC_002951.2 :699975-700350 | q1 | q2 | OK       | 7682.91 | 1515.09 | -2.34225    | 1.85912   | 0.06301  | 0.717594 |
| gene67  | gene67  | SACOL0070 | gi 57650036 ref NC_002951.2 :78529-80204   | q1 | q2 | NOTEST 0 |         | 0       | 0           | 0         | 1        | 1        |
| gene670 | gene670 | SACOL0673 | gi 57650036 ref NC_002951.2 :700497-700617 | q1 | q2 | NOTEST 0 |         | 0       | 0           | 0         | 1        | 1        |
| gene671 | gene671 | SACOL0675 | gi 57650036 ref NC_002951.2 :701297-702191 | q1 | q2 | OK       | 34.0925 | 55.0975 | 0.692533    | -0.47487  | 0.634877 | 0.978191 |
| gene672 | gene672 | SACOL0676 | gi 57650036 ref NC_002951.2 :702421-702646 | q1 | q2 | OK       | 5.72229 | 18.1492 | 1.66524     | -0.68748  | 0.491781 | 0.963286 |
| gene673 | gene673 | SACOL0677 | gi 57650036 ref NC_002951.2 :702662-702866 | q1 | q2 | OK       | 0       | 10.6332 | 1.79769e+30 | 1.79769e+ | 0.209916 | 0.842707 |
| gene674 | gene674 | SACOL0678 | gi 57650036 ref NC_002951.2 :703024-703585 | q1 | q2 | OK       | 31.0181 | 105.826 | 1.77051     | -1.11695  | 0.264018 | 0.901051 |
| gene675 | gene675 | SACOL0679 | gi 57650036 ref NC_002951.2 :703603-708245 | q1 | q2 | OK       | 39.3023 | 73.2241 | 0.897705    | -0.56119  | 0.574671 | 0.976548 |
| gene676 | gene676 | SACOL0680 | gi 57650036 ref NC_002951.2 :703603-708245 | q1 | q2 | OK       | 74.5989 | 103.756 | 0.475976    | -0.12104  | 0.903657 | 0.984151 |
| gene677 | gene677 | SACOL0681 | gi 57650036 ref NC_002951.2 :703603-708245 | q1 | q2 | OK       | 42.371  | 95.6068 | 1.17404     | -0.20154  | 0.840275 | 0.984151 |
| gene678 | gene678 | SACOL0682 | gi 57650036 ref NC_002951.2 :703603-708245 | q1 | q2 | OK       | 69.949  | 81.0192 | 0.211961    | -0.11882  | 0.905418 | 0.984151 |
| gene679 | gene679 | SACOL0684 | gi 57650036 ref NC_002951.2 :708245-709439 | q1 | q2 | OK       | 25.502  | 29.1944 | 0.195085    | -0.06468  | 0.948426 | 0.987716 |
| gene68  | gene68  | SACOL0071 | gi 57650036 ref NC_002951.2 :78529-80204   | q1 | q2 | NOTEST 0 |         | 0       | 0           | 0         | 1        | 1        |
| gene680 | gene680 | SACOL0685 | gi 57650036 ref NC_002951.2 :708245-709439 | q1 | q2 | OK       | 106.353 | 80.5974 | -0.400056   | 0.150166  | 0.880634 | 0.984151 |
| gene681 | gene681 | SACOL0686 | gi 57650036 ref NC_002951.2 :708245-709439 | q1 | q2 | OK       | 102.284 | 69.5064 | -0.557357   | 0.298356  | 0.765432 | 0.978191 |
| gene682 | gene682 | SACOL0687 | gi 57650036 ref NC_002951.2 :709778-711821 | q1 | q2 | OK       | 54.2406 | 92.0504 | 0.763052    | -0.74364  | 0.457094 | 0.956269 |
| gene683 | gene683 | SACOL0688 | gi 57650036 ref NC_002951.2 :712980-715480 | q1 | q2 | OK       | 253.7   | 260.379 | 0.0374919   | -0.0194   | 0.984524 | 0.997969 |
| gene684 | gene684 | SACOL0689 | gi 57650036 ref NC_002951.2 :712980-715480 | q1 | q2 | OK       | 153.221 | 219.407 | 0.518       | -0.21312  | 0.831233 | 0.984151 |
| gene685 | gene685 | SACOL0690 | gi 57650036 ref NC_002951.2 :712980-715480 | q1 | q2 | OK       | 202.357 | 343.645 | 0.764017    | -0.34766  | 0.728096 | 0.978191 |
| gene686 | gene686 | sirR      | gi 57650036 ref NC_002951.2 :715601-716246 | q1 | q2 | OK       | 134.832 | 155.833 | 0.208829    | -0.19147  | 0.848154 | 0.984151 |
| gene687 | gene687 | SACOL0692 | gi 57650036 ref NC_002951.2 :716325-717078 | q1 | q2 | OK       | 14.1219 | 25.1907 | 0.83496     | -0.45945  | 0.645914 | 0.978191 |
| gene688 | gene688 | tagA      | gi 57650036 ref NC_002951.2 :717313-718078 | q1 | q2 | OK       | 37.8758 | 48.4362 | 0.35481     | -0.22771  | 0.819873 | 0.984151 |
| gene689 | gene689 | SACOL0694 | gi 57650036 ref NC_002951.2 :718138-718933 | q1 | q2 | OK       | 207.473 | 89.8836 | -1.20679    | 1.11826   | 0.263456 | 0.900955 |
| gene69  | gene69  | SACOL0072 | gi 57650036 ref NC_002951.2 :80405-81266   | q1 | q2 | NOTEST 0 |         | 0       | 0           | 0         | 1        | 1        |
| gene690 | gene690 | SACOL0695 | gi 57650036 ref NC_002951.2 :719279-720092 | q1 | q2 | OK       | 233.391 | 62.6804 | -1.89666    | 1.60619   | 0.108232 | 0.825145 |
| gene691 | gene691 | tagB      | gi 57650036 ref NC_002951.2 :720190-722352 | q1 | q2 | OK       | 76.1832 | 52.2854 | -0.543066   | 0.3806    | 0.7035   | 0.978191 |
| gene692 | gene692 | tagX      | gi 57650036 ref NC_002951.2 :720190-722352 | q1 | q2 | OK       | 77.1971 | 54.7827 | -0.494827   | 0.3437    | 0.731072 | 0.978191 |
| gene693 | gene693 | tagD      | gi 57650036 ref NC_002951.2 :722414-722813 | q1 | q2 | OK       | 120.731 | 69.824  | -0.789997   | 0.476631  | 0.633625 | 0.978191 |
| gene694 | gene694 | pbp4      | gi 57650036 ref NC_002951.2 :722929-724225 | q1 | q2 | OK       | 39.6375 | 57.7863 | 0.543861    | -0.45882  | 0.646364 | 0.978191 |
| gene695 | gene695 | abcA      | gi 57650036 ref NC_002951.2 :724645-726373 | q1 | q2 | OK       | 144.116 | 82.4439 | -0.805749   | 0.769631  | 0.441519 | 0.956269 |
| gene696 | gene696 | SACOL0701 | gi 57650036 ref NC_002951.2 :726731-727961 | q1 | q2 | OK       | 173.193 | 54.5688 | -1.66623    | 1.53347   | 0.12516  | 0.842707 |



|         |         |           |                                            |    |    |            |         |           |          |          |          |
|---------|---------|-----------|--------------------------------------------|----|----|------------|---------|-----------|----------|----------|----------|
| gene697 | gene697 | SACOL0702 | gi 57650036 ref NC_002951.2 :728215-728308 | q1 | q2 | NOTEST 0   | 0       | 0         | 0        | 1        | 1        |
| gene698 | gene698 | SACOL0703 | gi 57650036 ref NC_002951.2 :728485-729319 | q1 | q2 | OK 61.2396 | 67.9581 | 0.150182  | -0.11489 | 0.908535 | 0.984151 |
| gene699 | gene699 | SACOL0704 | gi 57650036 ref NC_002951.2 :729600-730398 | q1 | q2 | OK 53.9215 | 67.8137 | 0.330715  | -0.24024 | 0.810148 | 0.984151 |
| gene7   | gene7   | hutH      | gi 57650036 ref NC_002951.2 :10919-12434   | q1 | q2 | OK 66.6583 | 36.9493 | -0.851239 | 0.764657 | 0.444476 | 0.956269 |
| gene70  | gene70  | SACOL0073 | gi 57650036 ref NC_002951.2 :81620-82154   | q1 | q2 | NOTEST 0   | 0       | 0         | 0        | 1        | 1        |
| gene700 | gene700 | SACOL0705 | gi 57650036 ref NC_002951.2 :730433-732451 | q1 | q2 | OK 18.8619 | 58.323  | 1.62859   | -0.81863 | 0.412995 | 0.94415  |
| gene701 | gene701 | SACOL0706 | gi 57650036 ref NC_002951.2 :730433-732451 | q1 | q2 | OK 86.1524 | 54.5719 | -0.658731 | 0.501407 | 0.616085 | 0.978191 |
| gene702 | gene702 | SACOL0707 | gi 57650036 ref NC_002951.2 :732687-733653 | q1 | q2 | OK 62.1477 | 73.499  | 0.242024  | -0.20503 | 0.837552 | 0.984151 |
| gene703 | gene703 | SACOL0708 | gi 57650036 ref NC_002951.2 :733694-734634 | q1 | q2 | OK 73.8778 | 96.0999 | 0.379395  | -0.25776 | 0.796593 | 0.984096 |
| gene704 | gene704 | SACOL0709 | gi 57650036 ref NC_002951.2 :733694-734634 | q1 | q2 | OK 40.4576 | 63.2482 | 0.644616  | -0.21617 | 0.828853 | 0.984151 |
| gene705 | gene705 | SACOL0710 | gi 57650036 ref NC_002951.2 :734749-735247 | q1 | q2 | OK 748.364 | 410.721 | -0.865583 | 0.830391 | 0.406318 | 0.940909 |
| gene706 | gene706 | SACOL0711 | gi 57650036 ref NC_002951.2 :735702-736770 | q1 | q2 | OK 274.215 | 97.1291 | -1.49733  | 1.41684  | 0.156529 | 0.842707 |
| gene707 | gene707 | SACOL0712 | gi 57650036 ref NC_002951.2 :736920-737964 | q1 | q2 | OK 18.2256 | 34.0962 | 0.903643  | -0.56403 | 0.572737 | 0.976548 |
| gene708 | gene708 | SACOL0713 | gi 57650036 ref NC_002951.2 :738292-738721 | q1 | q2 | OK 92.1754 | 33.4497 | -1.46239  | 0.82898  | 0.407116 | 0.940909 |
| gene709 | gene709 | SACOL0714 | gi 57650036 ref NC_002951.2 :738929-739436 | q1 | q2 | OK 259.897 | 189.239 | -0.457728 | 0.426966 | 0.669404 | 0.978191 |
| gene71  | gene71  | SACOL0074 | gi 57650036 ref NC_002951.2 :82253-82988   | q1 | q2 | NOTEST 0   | 0       | 0         | 0        | 1        | 1        |
| gene710 | gene710 | SACOL0715 | gi 57650036 ref NC_002951.2 :739548-740472 | q1 | q2 | OK 46.661  | 61.8454 | 0.406448  | -0.30395 | 0.761166 | 0.978191 |
| gene711 | gene711 | SACOL0716 | gi 57650036 ref NC_002951.2 :740478-742195 | q1 | q2 | OK 27.8371 | 37.2972 | 0.422059  | -0.18668 | 0.851909 | 0.984151 |
| gene712 | gene712 | SACOL0717 | gi 57650036 ref NC_002951.2 :740478-742195 | q1 | q2 | OK 74.2153 | 49.3538 | -0.588556 | 0.464989 | 0.64194  | 0.978191 |
| gene713 | gene713 | SACOL0718 | gi 57650036 ref NC_002951.2 :742338-744979 | q1 | q2 | OK 41.6574 | 93.5447 | 1.16708   | -0.54546 | 0.585437 | 0.978191 |
| gene714 | gene714 | SACOL0720 | gi 57650036 ref NC_002951.2 :742338-744979 | q1 | q2 | OK 41.0186 | 101.722 | 1.31029   | -1.0496  | 0.293902 | 0.924214 |
| gene715 | gene715 | SACOL0721 | gi 57650036 ref NC_002951.2 :745703-746321 | q1 | q2 | OK 150.019 | 59.6955 | -1.32946  | 0.993513 | 0.32046  | 0.927653 |
| gene716 | gene716 | SACOL0722 | gi 57650036 ref NC_002951.2 :746336-747344 | q1 | q2 | OK 151.407 | 51.9671 | -1.54276  | 1.341    | 0.179919 | 0.842707 |
| gene717 | gene717 | SACOL0723 | gi 57650036 ref NC_002951.2 :747931-748729 | q1 | q2 | OK 3542.83 | 766.037 | -2.20942  | 1.67315  | 0.094299 | 0.794532 |
| gene718 | gene718 | SACOL0724 | gi 57650036 ref NC_002951.2 :749089-749734 | q1 | q2 | OK 60.3198 | 50.2686 | -0.262975 | 0.169034 | 0.86577  | 0.984151 |
| gene719 | gene719 | SACOL0725 | gi 57650036 ref NC_002951.2 :750430-752581 | q1 | q2 | OK 11.6367 | 42.3996 | 1.86538   | -1.39814 | 0.16207  | 0.842707 |
| gene72  | gene72  | SACOL0075 | gi 57650036 ref NC_002951.2 :83421-84024   | q1 | q2 | OK 24.7717 | 31.9182 | 0.365684  | -0.20364 | 0.838634 | 0.984151 |
| gene720 | gene720 | sarX      | gi 57650036 ref NC_002951.2 :752660-753086 | q1 | q2 | OK 67.2441 | 34.7302 | -0.953216 | 0.527315 | 0.597975 | 0.978191 |
| gene721 | gene721 | SACOL0727 | gi 57650036 ref NC_002951.2 :753275-754465 | q1 | q2 | OK 100.005 | 112.296 | 0.167242  | -0.13534 | 0.892344 | 0.984151 |
| gene722 | gene722 | SACOL0728 | gi 57650036 ref NC_002951.2 :753275-754465 | q1 | q2 | OK 80.9376 | 71.796  | -0.172907 | 0.086822 | 0.930813 | 0.987716 |
| gene723 | gene723 | SACOL0730 | gi 57650036 ref NC_002951.2 :754817-755462 | q1 | q2 | OK 99.8571 | 102.594 | 0.0390028 | -0.03112 | 0.975171 | 0.995537 |
| gene724 | gene724 | SACOL0731 | gi 57650036 ref NC_002951.2 :755577-756444 | q1 | q2 | OK 89.6379 | 81.0443 | -0.145398 | 0.128437 | 0.897803 | 0.984151 |
| gene725 | gene725 | SACOL0733 | gi 57650036 ref NC_002951.2 :756782-758488 | q1 | q2 | OK 61.2501 | 41.612  | -0.557711 | 0.429934 | 0.667243 | 0.978191 |

|         |         |           |                                            |    |    |    |          |         |            |          |          |          |
|---------|---------|-----------|--------------------------------------------|----|----|----|----------|---------|------------|----------|----------|----------|
| gene726 | gene726 | SACOL0734 | gi 57650036 ref NC_002951.2 :756782-758488 | q1 | q2 | OK | 133.492  | 71.3842 | -0.903073  | 0.51122  | 0.609197 | 0.978191 |
| gene727 | gene727 | SACOL0735 | gi 57650036 ref NC_002951.2 :758586-759276 | q1 | q2 | OK | 35.2647  | 42.4782 | 0.268499   | -0.16343 | 0.870184 | 0.984151 |
| gene728 | gene728 | SACOL0736 | gi 57650036 ref NC_002951.2 :759402-759846 | q1 | q2 | OK | 0.966465 | 19.8073 | 4.35717    | -1.92815 | 0.053837 | 0.696046 |
| gene729 | gene729 | SACOL0737 | gi 57650036 ref NC_002951.2 :759912-760308 | q1 | q2 | OK | 47.8723  | 137.649 | 1.52373    | -0.90128 | 0.367439 | 0.93284  |
| gene73  | gene73  | SACOL0076 | gi 57650036 ref NC_002951.2 :84290-87443   | q1 | q2 | OK | 22.2399  | 27.0654 | 0.283299   | -0.26888 | 0.788023 | 0.982219 |
| gene730 | gene730 | SACOL0738 | gi 57650036 ref NC_002951.2 :760445-760745 | q1 | q2 | OK | 320.249  | 131.141 | -1.28807   | 0.802463 | 0.422285 | 0.949284 |
| gene731 | gene731 | SACOL0739 | gi 57650036 ref NC_002951.2 :760824-761367 | q1 | q2 | OK | 24.7397  | 52.771  | 1.09292    | -0.61754 | 0.536881 | 0.963603 |
| gene732 | gene732 | SACOL0740 | gi 57650036 ref NC_002951.2 :761462-762029 | q1 | q2 | OK | 62.1975  | 66.7922 | 0.102825   | -0.06554 | 0.947747 | 0.987716 |
| gene733 | gene733 | SACOL0741 | gi 57650036 ref NC_002951.2 :762030-762489 | q1 | q2 | OK | 24.4539  | 39.758  | 0.70118    | -0.37157 | 0.710214 | 0.978191 |
| gene734 | gene734 | SACOL0742 | gi 57650036 ref NC_002951.2 :762491-763175 | q1 | q2 | OK | 211.562  | 432.395 | 1.03127    | -0.98645 | 0.323915 | 0.927653 |
| gene735 | gene735 | uppP      | gi 57650036 ref NC_002951.2 :763346-764222 | q1 | q2 | OK | 75.3048  | 40.8342 | -0.882965  | 0.650819 | 0.515163 | 0.963286 |
| gene736 | gene736 | SACOL0744 | gi 57650036 ref NC_002951.2 :764440-767742 | q1 | q2 | OK | 62.0308  | 70.0468 | 0.175333   | -0.11708 | 0.906799 | 0.984151 |
| gene737 | gene737 | SACOL0745 | gi 57650036 ref NC_002951.2 :764440-767742 | q1 | q2 | OK | 66.1255  | 63.0447 | -0.0688318 | 0.046134 | 0.963203 | 0.989588 |
| gene738 | gene738 | norR      | gi 57650036 ref NC_002951.2 :767868-768312 | q1 | q2 | OK | 1262.2   | 223.944 | -2.49474   | 2.21726  | 0.026605 | 0.604847 |
| gene739 | gene739 | SACOL0747 | gi 57650036 ref NC_002951.2 :768538-769465 | q1 | q2 | OK | 29.76    | 25.4049 | -0.228269  | 0.140414 | 0.888333 | 0.984151 |
| gene74  | gene74  | SACOL0077 | gi 57650036 ref NC_002951.2 :87499-87982   | q1 | q2 | OK | 78.9738  | 40.4501 | -0.96523   | 0.568932 | 0.569402 | 0.976548 |
| gene740 | gene740 | SACOL0748 | gi 57650036 ref NC_002951.2 :769567-770476 | q1 | q2 | OK | 102.532  | 64.2862 | -0.673499  | 0.588216 | 0.556388 | 0.976548 |
| gene741 | gene741 | SACOL0749 | gi 57650036 ref NC_002951.2 :770510-770798 | q1 | q2 | OK | 291.76   | 89.9123 | -1.69819   | 0.991133 | 0.321621 | 0.927653 |
| gene742 | gene742 | SACOL0750 | gi 57650036 ref NC_002951.2 :771080-772634 | q1 | q2 | OK | 38.8547  | 58.6239 | 0.5934     | -0.5375  | 0.590924 | 0.978191 |
| gene743 | gene743 | SACOL0751 | gi 57650036 ref NC_002951.2 :772719-774093 | q1 | q2 | OK | 67.7726  | 60.4761 | -0.164337  | 0.157706 | 0.874688 | 0.984151 |
| gene744 | gene744 | SACOL0752 | gi 57650036 ref NC_002951.2 :774528-775146 | q1 | q2 | OK | 102.36   | 70.3728 | -0.540561  | 0.389331 | 0.697031 | 0.978191 |
| gene745 | gene745 | SACOL0753 | gi 57650036 ref NC_002951.2 :775331-775754 | q1 | q2 | OK | 165.249  | 48.3499 | -1.77306   | 1.09799  | 0.272207 | 0.906044 |
| gene746 | gene746 | norA      | gi 57650036 ref NC_002951.2 :775962-777129 | q1 | q2 | OK | 30.7931  | 87.897  | 1.51321    | -1.18736 | 0.235087 | 0.873429 |
| gene747 | gene747 | SACOL0755 | gi 57650036 ref NC_002951.2 :777421-777874 | q1 | q2 | OK | 2276.28  | 636.961 | -1.8374    | 1.5825   | 0.113535 | 0.836663 |
| gene748 | gene748 | SACOL0756 | gi 57650036 ref NC_002951.2 :778047-778530 | q1 | q2 | OK | 14.8076  | 37.2845 | 1.33224    | -0.6893  | 0.490632 | 0.963286 |
| gene749 | gene749 | SACOL0757 | gi 57650036 ref NC_002951.2 :778779-780461 | q1 | q2 | OK | 1.9727   | 34.8305 | 4.14211    | -1.57828 | 0.114502 | 0.836663 |
| gene75  | gene75  | plc       | gi 57650036 ref NC_002951.2 :88186-89173   | q1 | q2 | OK | 1.95864  | 32.9662 | 4.07306    | -2.12425 | 0.033649 | 0.620038 |
| gene750 | gene750 | fruK      | gi 57650036 ref NC_002951.2 :778779-780461 | q1 | q2 | OK | 1.53143  | 82.271  | 5.74743    | -2.45474 | 0.014099 | 0.500083 |
| gene751 | gene751 | SACOL0759 | gi 57650036 ref NC_002951.2 :780466-782424 | q1 | q2 | OK | 7.38946  | 39.0948 | 2.40344    | -1.65576 | 0.09777  | 0.809772 |
| gene752 | gene752 | nagA      | gi 57650036 ref NC_002951.2 :782731-783913 | q1 | q2 | OK | 49.4784  | 48.3101 | -0.0344744 | 0.028389 | 0.977352 | 0.996527 |
| gene753 | gene753 | SACOL0762 | gi 57650036 ref NC_002951.2 :784133-785483 | q1 | q2 | OK | 296.02   | 135.928 | -1.12285   | 1.01508  | 0.310066 | 0.927653 |
| gene754 | gene754 | SACOL0763 | gi 57650036 ref NC_002951.2 :785704-786544 | q1 | q2 | OK | 133.069  | 158.622 | 0.253413   | -0.24909 | 0.803292 | 0.984151 |
| gene755 | gene755 | SACOL0764 | gi 57650036 ref NC_002951.2 :786675-787659 | q1 | q2 | OK | 226.413  | 154.374 | -0.552526  | 0.537786 | 0.590725 | 0.978191 |

|         |         |             |                                            |    |    |          |          |         |             |          |          |          |
|---------|---------|-------------|--------------------------------------------|----|----|----------|----------|---------|-------------|----------|----------|----------|
| gene756 | gene756 | saeS        | gi 57650036 ref NC_002951.2 :787730-789920 | q1 | q2 | OK       | 146.782  | 417.927 | 1.50957     | -0.94454 | 0.344894 | 0.93284  |
| gene757 | gene757 | saeR        | gi 57650036 ref NC_002951.2 :787730-789920 | q1 | q2 | OK       | 168.246  | 332.002 | 0.980621    | -0.44337 | 0.657499 | 0.978191 |
| gene758 | gene758 | SACOL0767   | gi 57650036 ref NC_002951.2 :787730-789920 | q1 | q2 | OK       | 109.053  | 329.246 | 1.59414     | -0.49311 | 0.621939 | 0.978191 |
| gene759 | gene759 | SACOL0768   | gi 57650036 ref NC_002951.2 :790261-790702 | q1 | q2 | OK       | 238.038  | 304.649 | 0.355957    | -0.32228 | 0.747242 | 0.978191 |
| gene76  | gene76  | SACOL0079   | gi 57650036 ref NC_002951.2 :89393-90164   | q1 | q2 | OK       | 2.34129  | 1.07735 | -1.11981    | 0.479567 | 0.631535 | 0.978191 |
| gene760 | gene760 | SACOL0769   | gi 57650036 ref NC_002951.2 :790981-791566 | q1 | q2 | OK       | 104.02   | 64.8543 | -0.681585   | 0.472271 | 0.636733 | 0.978191 |
| gene761 | gene761 | SACOL0770   | gi 57650036 ref NC_002951.2 :791664-792378 | q1 | q2 | OK       | 44.4281  | 75.9497 | 0.773572    | -0.52991 | 0.596175 | 0.978191 |
| gene762 | gene762 | SACOL0771   | gi 57650036 ref NC_002951.2 :792381-792801 | q1 | q2 | OK       | 31.3781  | 34.2726 | 0.127296    | -0.0664  | 0.947062 | 0.987716 |
| gene763 | gene763 | SACOL0772   | gi 57650036 ref NC_002951.2 :792802-793471 | q1 | q2 | OK       | 16.7852  | 36.2754 | 1.1118      | -0.62167 | 0.534161 | 0.963286 |
| gene764 | gene764 | pabA        | gi 57650036 ref NC_002951.2 :793821-796158 | q1 | q2 | OK       | 5.76669  | 38.5235 | 2.73992     | -0.71797 | 0.472774 | 0.956269 |
| gene765 | gene765 | SACOL0774   | gi 57650036 ref NC_002951.2 :793821-796158 | q1 | q2 | OK       | 11.4004  | 29      | 1.34697     | -0.8507  | 0.394937 | 0.940909 |
| gene766 | gene766 | SACOL0776   | gi 57650036 ref NC_002951.2 :796517-798216 | q1 | q2 | OK       | 16.6535  | 30.1925 | 0.858362    | -0.34076 | 0.733283 | 0.978191 |
| gene767 | gene767 | SACOL0777   | gi 57650036 ref NC_002951.2 :796517-798216 | q1 | q2 | OK       | 30.343   | 47.7889 | 0.655309    | -0.39555 | 0.692437 | 0.978191 |
| gene768 | gene768 | SACOL0778   | gi 57650036 ref NC_002951.2 :798689-800630 | q1 | q2 | OK       | 570.267  | 188.412 | -1.59775    | 1.26233  | 0.206831 | 0.842707 |
| gene769 | gene769 | SACOL0779   | gi 57650036 ref NC_002951.2 :800906-802784 | q1 | q2 | OK       | 64.4274  | 64.0577 | -0.00830176 | 0.008233 | 0.993431 | 0.998638 |
| gene77  | gene77  | SACOL0080   | gi 57650036 ref NC_002951.2 :90215-90986   | q1 | q2 | OK       | 0.780429 | 8.25971 | 3.40375     | -1.5221  | 0.127985 | 0.842707 |
| gene770 | gene770 | recQ1       | gi 57650036 ref NC_002951.2 :802795-804577 | q1 | q2 | OK       | 122.538  | 72.1302 | -0.764549   | 0.739779 | 0.459434 | 0.956269 |
| gene771 | gene771 | SACOL0781   | gi 57650036 ref NC_002951.2 :804798-807283 | q1 | q2 | OK       | 156.579  | 168.29  | 0.104064    | -0.0544  | 0.956615 | 0.989561 |
| gene772 | gene772 | opuBB       | gi 57650036 ref NC_002951.2 :804798-807283 | q1 | q2 | OK       | 201.629  | 108.786 | -0.890207   | 0.588547 | 0.556165 | 0.976548 |
| gene773 | gene773 | hisC        | gi 57650036 ref NC_002951.2 :807522-808581 | q1 | q2 | OK       | 34.2626  | 62.2031 | 0.860354    | -0.64608 | 0.518226 | 0.963286 |
| gene774 | gene774 | SACOL0785   | gi 57650036 ref NC_002951.2 :808931-809474 | q1 | q2 | OK       | 57.5031  | 67.7228 | 0.236002    | -0.14716 | 0.88301  | 0.984151 |
| gene775 | gene775 | SACOL0786   | gi 57650036 ref NC_002951.2 :809586-809748 | q1 | q2 | OK       | 199.184  | 73.0504 | -1.44714    | 0.62332  | 0.533074 | 0.963286 |
| gene776 | gene776 | SACOL0787   | gi 57650036 ref NC_002951.2 :810153-811071 | q1 | q2 | OK       | 201.792  | 247.676 | 0.295589    | -0.28547 | 0.775286 | 0.981122 |
| gene777 | gene777 | SACOL0788   | gi 57650036 ref NC_002951.2 :811340-812846 | q1 | q2 | OK       | 332.299  | 48.6162 | -2.77297    | 2.39462  | 0.016638 | 0.500083 |
| gene778 | gene778 | SACOL0789   | gi 57650036 ref NC_002951.2 :813186-813687 | q1 | q2 | OK       | 73.1072  | 36.5037 | -1.00197    | 0.587749 | 0.556701 | 0.976548 |
| gene779 | gene779 | SACOL0790   | gi 57650036 ref NC_002951.2 :813706-814573 | q1 | q2 | OK       | 52.7868  | 39.3644 | -0.423285   | 0.289139 | 0.772475 | 0.980274 |
| gene78  | gene78  | SACOL0081   | gi 57650036 ref NC_002951.2 :91049-91214   | q1 | q2 | NOTEST 0 |          | 0       | 0           | 0        | 1        | 1        |
| gene780 | gene780 | SACOL0790.1 | gi 57650036 ref NC_002951.2 :814957-815224 | q1 | q2 | OK       | 375.587  | 131.407 | -1.5151     | 0.900921 | 0.36763  | 0.93284  |
| gene781 | gene781 | nrdI        | gi 57650036 ref NC_002951.2 :815373-817840 | q1 | q2 | OK       | 724.383  | 411.131 | -0.817154   | 0.199108 | 0.842179 | 0.984151 |
| gene782 | gene782 | nrdE        | gi 57650036 ref NC_002951.2 :815373-817840 | q1 | q2 | OK       | 720.223  | 274.96  | -1.38922    | 0.976984 | 0.328577 | 0.927653 |
| gene783 | gene783 | nrdF        | gi 57650036 ref NC_002951.2 :817957-818929 | q1 | q2 | OK       | 1385.4   | 245.32  | -2.49756    | 2.05187  | 0.040183 | 0.642147 |
| gene784 | gene784 | SACOL0794   | gi 57650036 ref NC_002951.2 :819061-819166 | q1 | q2 | NOTEST 0 |          | 0       | 0           | 0        | 1        | 1        |
| gene785 | gene785 | SACOL0796   | gi 57650036 ref NC_002951.2 :819636-822309 | q1 | q2 | OK       | 4.28121  | 36.8047 | 3.1038      | -1.43056 | 0.152556 | 0.842707 |

|         |         |           |                                            |    |    |          |          |          |             |             |          |          |
|---------|---------|-----------|--------------------------------------------|----|----|----------|----------|----------|-------------|-------------|----------|----------|
| gene786 | gene786 | SACOL0797 | gi 57650036 ref NC_002951.2 :819636-822309 | q1 | q2 | OK       | 2.03876  | 24.4206  | 3.58233     | -1.17489    | 0.240037 | 0.879153 |
| gene787 | gene787 | SACOL0798 | gi 57650036 ref NC_002951.2 :819636-822309 | q1 | q2 | OK       | 1.58695  | 33.1874  | 4.38631     | -1.14343    | 0.252862 | 0.889805 |
| gene788 | gene788 | SACOL0799 | gi 57650036 ref NC_002951.2 :822427-823456 | q1 | q2 | OK       | 5.03908  | 36.5728  | 2.85954     | -1.60877    | 0.107666 | 0.823346 |
| gene789 | gene789 | SACOL0800 | gi 57650036 ref NC_002951.2 :823772-824087 | q1 | q2 | OK       | 46.9704  | 26.3064  | -0.836336   | 0.408285    | 0.683064 | 0.978191 |
| gene79  | gene79  | SACOL0082 | gi 57650036 ref NC_002951.2 :91226-91823   | q1 | q2 | NOTEST 0 |          | 0.254964 | 1.79769e+30 | 1.79769e+30 | 0.207933 | 1        |
| gene790 | gene790 | murB      | gi 57650036 ref NC_002951.2 :824104-825028 | q1 | q2 | OK       | 62.8247  | 48.8778  | -0.362151   | 0.27475     | 0.783508 | 0.982219 |
| gene791 | gene791 | SACOL0802 | gi 57650036 ref NC_002951.2 :825154-825673 | q1 | q2 | OK       | 36.8641  | 21.9864  | -0.745604   | 0.401633    | 0.687954 | 0.978191 |
| gene792 | gene792 | SACOL0803 | gi 57650036 ref NC_002951.2 :825792-826671 | q1 | q2 | OK       | 27.0508  | 37.9275  | 0.48757     | -0.30566    | 0.759863 | 0.978191 |
| gene793 | gene793 | SACOL0804 | gi 57650036 ref NC_002951.2 :826824-827145 | q1 | q2 | OK       | 235.852  | 193.741  | -0.283753   | 0.18503     | 0.853205 | 0.984151 |
| gene794 | gene794 | SACOL0805 | gi 57650036 ref NC_002951.2 :827569-828694 | q1 | q2 | OK       | 78.4368  | 91.9267  | 0.228952    | -0.22077    | 0.825269 | 0.984151 |
| gene795 | gene795 | pepT      | gi 57650036 ref NC_002951.2 :828882-830109 | q1 | q2 | OK       | 175.201  | 109.047  | -0.684063   | 0.665905    | 0.505472 | 0.963286 |
| gene796 | gene796 | SACOL0807 | gi 57650036 ref NC_002951.2 :830122-830617 | q1 | q2 | OK       | 31.4593  | 25.367   | -0.310536   | 0.1652      | 0.868787 | 0.984151 |
| gene797 | gene797 | SACOL0808 | gi 57650036 ref NC_002951.2 :830634-831396 | q1 | q2 | OK       | 25.7879  | 26.4405  | 0.036053    | -0.02094    | 0.983291 | 0.997969 |
| gene798 | gene798 | SACOL0809 | gi 57650036 ref NC_002951.2 :831591-832662 | q1 | q2 | OK       | 59.4885  | 34.0112  | -0.806601   | 0.604063    | 0.545802 | 0.97151  |
| gene799 | gene799 | SACOL0810 | gi 57650036 ref NC_002951.2 :832979-834035 | q1 | q2 | OK       | 66.7192  | 44.7562  | -0.576013   | 0.46518     | 0.641802 | 0.978191 |
| gene8   | gene8   | serS      | gi 57650036 ref NC_002951.2 :12812-14099   | q1 | q2 | OK       | 60.4616  | 42.9515  | -0.49331    | 0.428019    | 0.668638 | 0.978191 |
| gene80  | gene80  | SACOL0083 | gi 57650036 ref NC_002951.2 :91889-92657   | q1 | q2 | OK       | 0.392365 | 1.80479  | 2.20156     | -0.91521    | 0.36008  | 0.93284  |
| gene800 | gene800 | SACOL0811 | gi 57650036 ref NC_002951.2 :834204-834846 | q1 | q2 | OK       | 157.752  | 128.562  | -0.295191   | 0.269893    | 0.787242 | 0.982219 |
| gene801 | gene801 | SACOL0812 | gi 57650036 ref NC_002951.2 :834989-835856 | q1 | q2 | OK       | 154.376  | 73.7889  | -1.06498    | 0.966933    | 0.333577 | 0.927653 |
| gene802 | gene802 | SACOL0813 | gi 57650036 ref NC_002951.2 :836219-837969 | q1 | q2 | OK       | 3.9768   | 47.7555  | 3.58598     | -1.80815    | 0.070583 | 0.754145 |
| gene803 | gene803 | SACOL0814 | gi 57650036 ref NC_002951.2 :836219-837969 | q1 | q2 | OK       | 3.78561  | 64.3712  | 4.08782     | -1.51633    | 0.129436 | 0.842707 |
| gene804 | gene804 | SACOL0815 | gi 57650036 ref NC_002951.2 :838029-838602 | q1 | q2 | OK       | 2214.76  | 650.078  | -1.76846    | 1.44489     | 0.148488 | 0.842707 |
| gene805 | gene805 | secA      | gi 57650036 ref NC_002951.2 :839015-841547 | q1 | q2 | OK       | 255.393  | 94.9693  | -1.42719    | 1.19833     | 0.23079  | 0.863636 |
| gene806 | gene806 | SACOL0817 | gi 57650036 ref NC_002951.2 :841588-841693 | q1 | q2 | NOTEST 0 |          | 0        | 0           | 0           | 1        | 1        |
| gene807 | gene807 | prfB      | gi 57650036 ref NC_002951.2 :841861-842972 | q1 | q2 | OK       | 82.5628  | 66.0019  | -0.322985   | 0.301014    | 0.763404 | 0.978191 |
| gene808 | gene808 | SACOL0819 | gi 57650036 ref NC_002951.2 :843125-843233 | q1 | q2 | NOTEST 0 |          | 0        | 0           | 0           | 1        | 1        |
| gene809 | gene809 | SACOL0820 | gi 57650036 ref NC_002951.2 :843380-844220 | q1 | q2 | OK       | 11.7822  | 35.035   | 1.57219     | -0.89752    | 0.369444 | 0.932852 |
| gene81  | gene81  | SACOL0084 | gi 57650036 ref NC_002951.2 :92789-94988   | q1 | q2 | OK       | 32.8722  | 53.0215  | 0.689708    | -0.66058    | 0.508883 | 0.963286 |
| gene810 | gene810 | SACOL0821 | gi 57650036 ref NC_002951.2 :844393-845277 | q1 | q2 | OK       | 23.9891  | 40.6019  | 0.759168    | -0.38217    | 0.702333 | 0.978191 |
| gene811 | gene811 | SACOL0822 | gi 57650036 ref NC_002951.2 :844393-845277 | q1 | q2 | OK       | 38.2883  | 53.6729  | 0.487292    | -0.10846    | 0.91363  | 0.984151 |
| gene812 | gene812 | uvrB      | gi 57650036 ref NC_002951.2 :845539-847531 | q1 | q2 | OK       | 77.6678  | 87.6387  | 0.17425     | -0.16984    | 0.865133 | 0.984151 |
| gene813 | gene813 | uvrA      | gi 57650036 ref NC_002951.2 :847538-850385 | q1 | q2 | OK       | 111.386  | 80.9261  | -0.460898   | 0.414681    | 0.678375 | 0.978191 |
| gene814 | gene814 | hprK      | gi 57650036 ref NC_002951.2 :850991-851924 | q1 | q2 | OK       | 172.533  | 159.658  | -0.111891   | 0.110679    | 0.911871 | 0.984151 |

|         |         |            |                                            |    |    |          |         |         |             |           |          |          |
|---------|---------|------------|--------------------------------------------|----|----|----------|---------|---------|-------------|-----------|----------|----------|
| gene815 | gene815 | lgt        | gi 57650036 ref NC_002951.2 :851929-852769 | q1 | q2 | OK       | 102.921 | 109.444 | 0.0886611   | -0.08297  | 0.933874 | 0.987716 |
| gene816 | gene816 | SACOL0827  | gi 57650036 ref NC_002951.2 :852776-853262 | q1 | q2 | OK       | 107.356 | 74.1797 | -0.533306   | 0.345911  | 0.729409 | 0.978191 |
| gene817 | gene817 | SACOL0828  | gi 57650036 ref NC_002951.2 :853269-854709 | q1 | q2 | OK       | 82.3582 | 42.6821 | -0.948279   | 0.87387   | 0.382189 | 0.940893 |
| gene818 | gene818 | trxB       | gi 57650036 ref NC_002951.2 :854775-855711 | q1 | q2 | OK       | 621.562 | 654.038 | 0.073475    | -0.0589   | 0.953033 | 0.988316 |
| gene819 | gene819 | SACOL0830  | gi 57650036 ref NC_002951.2 :856420-858324 | q1 | q2 | OK       | 93.0871 | 113.704 | 0.288627    | -0.14284  | 0.886413 | 0.984151 |
| gene82  | gene82  | SACOL0085  | gi 57650036 ref NC_002951.2 :95138-96317   | q1 | q2 | OK       | 8.2723  | 28.2039 | 1.76953     | -1.03709  | 0.299692 | 0.924214 |
| gene820 | gene820 | SACOL0831  | gi 57650036 ref NC_002951.2 :856420-858324 | q1 | q2 | OK       | 171.458 | 262.76  | 0.615886    | -0.46558  | 0.641517 | 0.978191 |
| gene821 | gene821 | SACOL0832  | gi 57650036 ref NC_002951.2 :858433-859378 | q1 | q2 | OK       | 235.101 | 266.065 | 0.178501    | -0.16935  | 0.865525 | 0.984151 |
| gene823 | gene823 | clpP       | gi 57650036 ref NC_002951.2 :859950-860538 | q1 | q2 | OK       | 777.833 | 322.914 | -1.26831    | 1.17688   | 0.239242 | 0.879153 |
| gene824 | gene824 | SACOL0834  | gi 57650036 ref NC_002951.2 :860780-861683 | q1 | q2 | OK       | 100.608 | 81.8336 | -0.297982   | 0.273611  | 0.784383 | 0.982219 |
| gene825 | gene825 | SACOL0835  | gi 57650036 ref NC_002951.2 :862386-863016 | q1 | q2 | OK       | 111.427 | 504.191 | 2.17788     | -1.86394  | 0.06233  | 0.717594 |
| gene826 | gene826 | SACOL0836  | gi 57650036 ref NC_002951.2 :863204-863351 | q1 | q2 | NOTEST 0 | 0       | 0       | 0           | 0         | 1        | 1        |
| gene827 | gene827 | gapR       | gi 57650036 ref NC_002951.2 :863775-864789 | q1 | q2 | OK       | 249.169 | 429.764 | 0.786422    | -0.69696  | 0.485826 | 0.96277  |
| gene828 | gene828 | gapA1      | gi 57650036 ref NC_002951.2 :864841-865852 | q1 | q2 | OK       | 1250.59 | 577.857 | -1.11382    | 0.854636  | 0.392753 | 0.940909 |
| gene829 | gene829 | pgk        | gi 57650036 ref NC_002951.2 :865990-867181 | q1 | q2 | OK       | 231.622 | 210.164 | -0.140252   | 0.129824  | 0.896706 | 0.984151 |
| gene83  | gene83  | SACOL0086  | gi 57650036 ref NC_002951.2 :96318-97707   | q1 | q2 | OK       | 7.14825 | 85.2952 | 3.5768      | -2.37428  | 0.017583 | 0.500083 |
| gene830 | gene830 | tpiA       | gi 57650036 ref NC_002951.2 :867302-868064 | q1 | q2 | OK       | 340.004 | 238.147 | -0.513701   | 0.496243  | 0.619723 | 0.978191 |
| gene831 | gene831 | pgm        | gi 57650036 ref NC_002951.2 :868066-869584 | q1 | q2 | OK       | 295.224 | 193.034 | -0.612959   | 0.527723  | 0.597691 | 0.978191 |
| gene832 | gene832 | eno        | gi 57650036 ref NC_002951.2 :869713-871018 | q1 | q2 | OK       | 766.992 | 247.176 | -1.63368    | 1.32017   | 0.186779 | 0.842707 |
| gene833 | gene833 | SACOL0843  | gi 57650036 ref NC_002951.2 :871357-871816 | q1 | q2 | OK       | 63.3991 | 59.637  | -0.0882535  | 0.051919  | 0.958593 | 0.989588 |
| gene834 | gene834 | secG       | gi 57650036 ref NC_002951.2 :871882-872116 | q1 | q2 | OK       | 2102.47 | 215.578 | -3.2858     | 2.26391   | 0.023579 | 0.582014 |
| gene835 | gene835 | est        | gi 57650036 ref NC_002951.2 :872231-872972 | q1 | q2 | OK       | 56.1462 | 81.7373 | 0.541805    | -0.39583  | 0.692234 | 0.978191 |
| gene836 | gene836 | SACOL0846  | gi 57650036 ref NC_002951.2 :873005-875378 | q1 | q2 | OK       | 177.789 | 120.866 | -0.556752   | 0.478154  | 0.632541 | 0.978191 |
| gene837 | gene837 | smpB       | gi 57650036 ref NC_002951.2 :875399-875864 | q1 | q2 | OK       | 342.772 | 133.203 | -1.36363    | 1.13695   | 0.25556  | 0.890872 |
| gene838 | gene838 | SACOL_Satm | gi 57650036 ref NC_002951.2 :875954-876313 | q1 | q2 | OK       | 308759  | 91711.5 | -1.75131    | 1.52785   | 0.126549 | 0.842707 |
| gene839 | gene839 | SACOL0848  | gi 57650036 ref NC_002951.2 :876637-876919 | q1 | q2 | OK       | 37.1475 | 63.4867 | 0.77319     | -0.37932  | 0.704452 | 0.978191 |
| gene84  | gene84  | SACOL0087  | gi 57650036 ref NC_002951.2 :97874-97982   | q1 | q2 | NOTEST 0 | 0       | 0       | 0           | 0         | 1        | 1        |
| gene840 | gene840 | SACOL0849  | gi 57650036 ref NC_002951.2 :877185-877509 | q1 | q2 | OK       | 47.6428 | 40.3187 | -0.240808   | 0.121399  | 0.903375 | 0.984151 |
| gene841 | gene841 | SACOL0850  | gi 57650036 ref NC_002951.2 :877524-877671 | q1 | q2 | OK       | 0       | 22.191  | 1.79769e+30 | 1.79769e+ | 0.207933 | 0.842707 |
| gene842 | gene842 | SACOL0851  | gi 57650036 ref NC_002951.2 :877862-878591 | q1 | q2 | OK       | 6.33963 | 41.9597 | 2.72653     | -1.46906  | 0.141818 | 0.842707 |
| gene843 | gene843 | SACOL0853  | gi 57650036 ref NC_002951.2 :879026-879182 | q1 | q2 | NOTEST 0 | 0       | 0       | 0           | 0         | 1        | 1        |
| gene844 | gene844 | SACOL0854  | gi 57650036 ref NC_002951.2 :879189-879711 | q1 | q2 | OK       | 2.86232 | 68.8006 | 4.58716     | -2.29974  | 0.021463 | 0.545995 |
| gene845 | gene845 | SACOL0855  | gi 57650036 ref NC_002951.2 :879849-880380 | q1 | q2 | OK       | 20.1459 | 53.6791 | 1.41388     | -0.78331  | 0.433443 | 0.956269 |

|         |         |           |                                            |    |    |          |         |         |            |          |          |          |
|---------|---------|-----------|--------------------------------------------|----|----|----------|---------|---------|------------|----------|----------|----------|
| gene846 | gene846 | clfA      | gi 57650036 ref NC_002951.2 :880642-883444 | q1 | q2 | OK       | 737.394 | 1284.56 | 0.800762   | -0.57871 | 0.562785 | 0.976548 |
| gene847 | gene847 | SACOL0857 | gi 57650036 ref NC_002951.2 :883664-885191 | q1 | q2 | OK       | 1.80271 | 33.3976 | 4.21151    | -2.38726 | 0.016974 | 0.500083 |
| gene848 | gene848 | empbp     | gi 57650036 ref NC_002951.2 :885541-886564 | q1 | q2 | OK       | 4.00808 | 39.3482 | 3.29531    | -1.83802 | 0.06606  | 0.73141  |
| gene849 | gene849 | SACOL0859 | gi 57650036 ref NC_002951.2 :886898-887369 | q1 | q2 | OK       | 2.58664 | 42.4999 | 4.03831    | -1.91706 | 0.055231 | 0.696046 |
| gene85  | gene85  | SACOL0088 | gi 57650036 ref NC_002951.2 :98199-99861   | q1 | q2 | OK       | 51.0845 | 122.899 | 1.26651    | -1.20883 | 0.226729 | 0.855829 |
| gene850 | gene850 | nuc       | gi 57650036 ref NC_002951.2 :887709-888396 | q1 | q2 | OK       | 14.2894 | 23.879  | 0.7408     | -0.39889 | 0.689972 | 0.978191 |
| gene851 | gene851 | SACOL0861 | gi 57650036 ref NC_002951.2 :888752-888953 | q1 | q2 | OK       | 25216   | 3434.46 | -2.87618   | 2.47916  | 0.013169 | 0.500083 |
| gene852 | gene852 | SACOL0862 | gi 57650036 ref NC_002951.2 :889448-889667 | q1 | q2 | OK       | 145.291 | 111.901 | -0.376721  | 0.187236 | 0.851476 | 0.984151 |
| gene853 | gene853 | SACOL0863 | gi 57650036 ref NC_002951.2 :889728-890013 | q1 | q2 | OK       | 72.2194 | 45.2209 | -0.675396  | 0.338054 | 0.735322 | 0.978191 |
| gene854 | gene854 | SACOL0864 | gi 57650036 ref NC_002951.2 :890100-890670 | q1 | q2 | OK       | 6.16594 | 44.456  | 2.84999    | -1.46824 | 0.14204  | 0.842707 |
| gene855 | gene855 | SACOL0865 | gi 57650036 ref NC_002951.2 :891074-891335 | q1 | q2 | OK       | 56.7816 | 14.6266 | -1.95683   | 0.893884 | 0.371384 | 0.935213 |
| gene856 | gene856 | SACOL0866 | gi 57650036 ref NC_002951.2 :891639-891744 | q1 | q2 | NOTEST 0 | 0       | 0       | 0          | 0        | 1        | 1        |
| gene857 | gene857 | SACOL0868 | gi 57650036 ref NC_002951.2 :891875-892112 | q1 | q2 | OK       | 703.547 | 871.722 | 0.309222   | -0.23282 | 0.815901 | 0.984151 |
| gene858 | gene858 | SACOL0869 | gi 57650036 ref NC_002951.2 :892327-892918 | q1 | q2 | OK       | 17.4413 | 31.8213 | 0.86749    | -0.46863 | 0.639338 | 0.978191 |
| gene859 | gene859 | SACOL0870 | gi 57650036 ref NC_002951.2 :892990-893608 | q1 | q2 | OK       | 59.0329 | 66.2475 | 0.166345   | -0.10865 | 0.913479 | 0.984151 |
| gene86  | gene86  | SACOL0089 | gi 57650036 ref NC_002951.2 :100186-101962 | q1 | q2 | OK       | 14.4476 | 31.5598 | 1.12725    | -0.80481 | 0.42093  | 0.949284 |
| gene860 | gene860 | SACOL0871 | gi 57650036 ref NC_002951.2 :893762-894257 | q1 | q2 | OK       | 42.4701 | 61.5572 | 0.535481   | -0.31236 | 0.754767 | 0.978191 |
| gene861 | gene861 | SACOL0872 | gi 57650036 ref NC_002951.2 :894655-895078 | q1 | q2 | OK       | 234.547 | 134.94  | -0.797559  | 0.598273 | 0.549657 | 0.974547 |
| gene862 | gene862 | aroD      | gi 57650036 ref NC_002951.2 :895225-895942 | q1 | q2 | OK       | 19.4815 | 32.6213 | 0.743713   | -0.42367 | 0.671805 | 0.978191 |
| gene863 | gene863 | SACOL0874 | gi 57650036 ref NC_002951.2 :896024-896564 | q1 | q2 | OK       | 44.5479 | 83.073  | 0.899023   | -0.55871 | 0.576361 | 0.976548 |
| gene864 | gene864 | SACOL0875 | gi 57650036 ref NC_002951.2 :896713-897034 | q1 | q2 | OK       | 406.642 | 147.976 | -1.4584    | 1.00119  | 0.316737 | 0.927653 |
| gene865 | gene865 | SACOL0876 | gi 57650036 ref NC_002951.2 :897177-897534 | q1 | q2 | OK       | 227.674 | 115.09  | -0.9842    | 0.638842 | 0.522926 | 0.963286 |
| gene866 | gene866 | gcvH      | gi 57650036 ref NC_002951.2 :897691-898072 | q1 | q2 | OK       | 1278.34 | 390.892 | -1.70943   | 1.62538  | 0.104082 | 0.816291 |
| gene867 | gene867 | SACOL0879 | gi 57650036 ref NC_002951.2 :898250-899129 | q1 | q2 | OK       | 102.337 | 25.0321 | -2.03147   | 1.45019  | 0.147004 | 0.842707 |
| gene868 | gene868 | SACOL0880 | gi 57650036 ref NC_002951.2 :899870-900546 | q1 | q2 | OK       | 45.2201 | 71.8531 | 0.668088   | -0.2794  | 0.779937 | 0.982219 |
| gene869 | gene869 | SACOL0881 | gi 57650036 ref NC_002951.2 :899870-900546 | q1 | q2 | OK       | 124.561 | 58.0557 | -1.10135   | 0.433797 | 0.664436 | 0.978191 |
| gene87  | gene87  | SACOL0090 | gi 57650036 ref NC_002951.2 :102135-103008 | q1 | q2 | NOTEST 0 | 0       | 0       | 0          | 0        | 1        | 1        |
| gene870 | gene870 | SACOL0882 | gi 57650036 ref NC_002951.2 :900795-902509 | q1 | q2 | OK       | 29.2827 | 30.9407 | 0.0794547  | -0.04762 | 0.962021 | 0.989588 |
| gene871 | gene871 | SACOL0883 | gi 57650036 ref NC_002951.2 :900795-902509 | q1 | q2 | OK       | 23.5126 | 36.6311 | 0.639633   | -0.28859 | 0.772896 | 0.980274 |
| gene872 | gene872 | SACOL0884 | gi 57650036 ref NC_002951.2 :902526-903348 | q1 | q2 | OK       | 69.9638 | 47.2574 | -0.566069  | 0.409606 | 0.682095 | 0.978191 |
| gene873 | gene873 | SACOL0885 | gi 57650036 ref NC_002951.2 :903490-904711 | q1 | q2 | OK       | 4.71154 | 24.5196 | 2.37966    | -1.32714 | 0.184462 | 0.842707 |
| gene874 | gene874 | sek       | gi 57650036 ref NC_002951.2 :904799-905528 | q1 | q2 | OK       | 34.6567 | 32.8716 | -0.0762902 | 0.045883 | 0.963404 | 0.989588 |
| gene875 | gene875 | sei       | gi 57650036 ref NC_002951.2 :905551-906280 | q1 | q2 | OK       | 16.9057 | 33.065  | 0.967795   | -0.54782 | 0.583819 | 0.978191 |

|         |         |           |                                            |    |    |          |         |         |           |          |          |          |
|---------|---------|-----------|--------------------------------------------|----|----|----------|---------|---------|-----------|----------|----------|----------|
| gene876 | gene876 | SACOL0888 | gi 57650036 ref NC_002951.2 :906349-906781 | q1 | q2 | OK       | 25.527  | 41.0973 | 0.68702   | -0.36053 | 0.71845  | 0.978191 |
| gene877 | gene877 | SACOL0889 | gi 57650036 ref NC_002951.2 :906797-907256 | q1 | q2 | OK       | 12.6798 | 32.4945 | 1.35766   | -0.68273 | 0.494777 | 0.963286 |
| gene878 | gene878 | SACOL0890 | gi 57650036 ref NC_002951.2 :907267-907600 | q1 | q2 | OK       | 20.3648 | 47.7441 | 1.22925   | -0.60237 | 0.546928 | 0.97184  |
| gene879 | gene879 | SACOL0891 | gi 57650036 ref NC_002951.2 :907792-908321 | q1 | q2 | OK       | 10.2994 | 70.5772 | 2.77664   | -0.99631 | 0.319101 | 0.927653 |
| gene88  | gene88  | SACOL0091 | gi 57650036 ref NC_002951.2 :103120-104518 | q1 | q2 | NOTEST 0 |         | 0       | 0         | 0        | 1        | 1        |
| gene880 | gene880 | SACOL0892 | gi 57650036 ref NC_002951.2 :907792-908321 | q1 | q2 | OK       | 9.36712 | 30.1714 | 1.6875    | -0.51738 | 0.604894 | 0.978191 |
| gene881 | gene881 | SACOL0893 | gi 57650036 ref NC_002951.2 :908332-908681 | q1 | q2 | NOTEST 0 |         | 0       | 0         | 0        | 1        | 1        |
| gene882 | gene882 | SACOL0894 | gi 57650036 ref NC_002951.2 :908332-908681 | q1 | q2 | NOTEST 0 |         | 0       | 0         | 0        | 1        | 1        |
| gene883 | gene883 | SACOL0895 | gi 57650036 ref NC_002951.2 :908683-909004 | q1 | q2 | NOTEST 0 |         | 0       | 0         | 0        | 1        | 1        |
| gene884 | gene884 | SACOL0896 | gi 57650036 ref NC_002951.2 :909067-909937 | q1 | q2 | NOTEST 0 |         | 0       | 0         | 0        | 1        | 1        |
| gene885 | gene885 | SACOL0897 | gi 57650036 ref NC_002951.2 :909953-911411 | q1 | q2 | NOTEST 0 |         | 0       | 0         | 0        | 1        | 1        |
| gene886 | gene886 | SACOL0898 | gi 57650036 ref NC_002951.2 :911711-912074 | q1 | q2 | NOTEST 0 |         | 0       | 0         | 0        | 1        | 1        |
| gene887 | gene887 | SACOL0899 | gi 57650036 ref NC_002951.2 :912075-912998 | q1 | q2 | NOTEST 0 |         | 0       | 0         | 0        | 1        | 1        |
| gene888 | gene888 | SACOL0900 | gi 57650036 ref NC_002951.2 :912075-912998 | q1 | q2 | OK       | 7.14733 | 24.6085 | 1.78368   | -0.82602 | 0.408792 | 0.940909 |
| gene889 | gene889 | SACOL0901 | gi 57650036 ref NC_002951.2 :913514-913856 | q1 | q2 | OK       | 19.05   | 35.1175 | 0.882397  | -0.4264  | 0.669819 | 0.978191 |
| gene89  | gene89  | SACOL0092 | gi 57650036 ref NC_002951.2 :104707-105181 | q1 | q2 | OK       | 63.0462 | 105.518 | 0.743014  | -0.46917 | 0.638947 | 0.978191 |
| gene890 | gene890 | SACOL0902 | gi 57650036 ref NC_002951.2 :913867-914446 | q1 | q2 | OK       | 13.2218 | 35.7168 | 1.43368   | -0.76325 | 0.445313 | 0.956269 |
| gene891 | gene891 | SACOL0903 | gi 57650036 ref NC_002951.2 :914463-914682 | q1 | q2 | OK       | 88.4379 | 99.185  | 0.165456  | -0.07959 | 0.936565 | 0.987716 |
| gene892 | gene892 | SACOL0904 | gi 57650036 ref NC_002951.2 :914732-915260 | q1 | q2 | OK       | 4.20908 | 45.2741 | 3.42711   | -1.708   | 0.087636 | 0.771999 |
| gene893 | gene893 | SACOL0905 | gi 57650036 ref NC_002951.2 :915262-916170 | q1 | q2 | OK       | 5.19546 | 34.4549 | 2.72939   | -0.71379 | 0.475357 | 0.956269 |
| gene894 | gene894 | SACOL0906 | gi 57650036 ref NC_002951.2 :915262-916170 | q1 | q2 | OK       | 6.16594 | 37.6376 | 2.60978   | -1.19584 | 0.231758 | 0.863636 |
| gene895 | gene895 | seb       | gi 57650036 ref NC_002951.2 :916477-917278 | q1 | q2 | NOTEST 0 |         | 0       | 0         | 0        | 1        | 1        |
| gene896 | gene896 | SACOL0908 | gi 57650036 ref NC_002951.2 :917355-917913 | q1 | q2 | NOTEST 0 |         | 0       | 0         | 0        | 1        | 1        |
| gene897 | gene897 | SACOL0909 | gi 57650036 ref NC_002951.2 :918285-918438 | q1 | q2 | OK       | 598.227 | 172.17  | -1.79686  | 0.811878 | 0.416861 | 0.948553 |
| gene898 | gene898 | SACOL0910 | gi 57650036 ref NC_002951.2 :918508-918806 | q1 | q2 | NOTEST 0 |         | 0       | 0         | 0        | 1        | 1        |
| gene899 | gene899 | SACOL0911 | gi 57650036 ref NC_002951.2 :918508-918806 | q1 | q2 | OK       | 170.257 | 76.4914 | -1.15435  | 0.438011 | 0.661378 | 0.978191 |
| gene9   | gene9   | SACOL0010 | gi 57650036 ref NC_002951.2 :14748-15770   | q1 | q2 | OK       | 19.8953 | 58.2394 | 1.54957   | -0.84717 | 0.396901 | 0.940909 |
| gene90  | gene90  | SACOL0093 | gi 57650036 ref NC_002951.2 :105442-107035 | q1 | q2 | OK       | 96.7101 | 69.5868 | -0.474852 | 0.468684 | 0.639296 | 0.978191 |
| gene900 | gene900 | SACOL0912 | gi 57650036 ref NC_002951.2 :919636-919831 | q1 | q2 | OK       | 49199.6 | 37258.4 | -0.401082 | 0.297455 | 0.76612  | 0.978191 |
| gene901 | gene901 | SACOL0913 | gi 57650036 ref NC_002951.2 :920063-920915 | q1 | q2 | OK       | 69.683  | 203.285 | 1.54462   | -1.34615 | 0.178254 | 0.842707 |
| gene902 | gene902 | SACOL0914 | gi 57650036 ref NC_002951.2 :921242-922004 | q1 | q2 | OK       | 429.27  | 371.808 | -0.207327 | 0.191093 | 0.848453 | 0.984151 |
| gene903 | gene903 | sufD      | gi 57650036 ref NC_002951.2 :922101-923409 | q1 | q2 | OK       | 418.384 | 231.121 | -0.856179 | 0.724849 | 0.468545 | 0.956269 |
| gene904 | gene904 | SACOL0916 | gi 57650036 ref NC_002951.2 :923523-925219 | q1 | q2 | OK       | 394.321 | 241.731 | -0.705966 | 0.527158 | 0.598084 | 0.978191 |

|         |         |           |                                            |    |    |          |         |         |             |           |          |          |
|---------|---------|-----------|--------------------------------------------|----|----|----------|---------|---------|-------------|-----------|----------|----------|
| gene905 | gene905 | SACOL0917 | gi 57650036 ref NC_002951.2 :923523-925219 | q1 | q2 | OK       | 347.189 | 220.009 | -0.658161   | 0.232363  | 0.816256 | 0.984151 |
| gene906 | gene906 | sufB      | gi 57650036 ref NC_002951.2 :925369-926767 | q1 | q2 | OK       | 598.762 | 209.747 | -1.51333    | 1.24277   | 0.213951 | 0.850184 |
| gene907 | gene907 | SACOL0919 | gi 57650036 ref NC_002951.2 :926953-927091 | q1 | q2 | OK       | 0       | 34.2398 | 1.79769e+30 | 1.79769e+ | 0.207933 | 0.842707 |
| gene908 | gene908 | SACOL0920 | gi 57650036 ref NC_002951.2 :927096-927411 | q1 | q2 | OK       | 6.40505 | 31.8866 | 2.31567     | -1.041    | 0.297878 | 0.924214 |
| gene909 | gene909 | SACOL0921 | gi 57650036 ref NC_002951.2 :927775-928816 | q1 | q2 | OK       | 38.1529 | 88.246  | 1.20974     | -0.95737  | 0.338378 | 0.93058  |
| gene91  | gene91  | spa       | gi 57650036 ref NC_002951.2 :107363-108890 | q1 | q2 | OK       | 11.4718 | 39.3699 | 1.779       | -1.21466  | 0.224496 | 0.854232 |
| gene910 | gene910 | SACOL0922 | gi 57650036 ref NC_002951.2 :928829-929897 | q1 | q2 | OK       | 22.7669 | 118.369 | 2.37828     | -1.74926  | 0.080246 | 0.760657 |
| gene911 | gene911 | SACOL0924 | gi 57650036 ref NC_002951.2 :930109-930958 | q1 | q2 | OK       | 92.2178 | 82.9165 | -0.153386   | 0.135389  | 0.892304 | 0.984151 |
| gene912 | gene912 | SACOL0925 | gi 57650036 ref NC_002951.2 :930970-931798 | q1 | q2 | OK       | 59.727  | 47.8002 | -0.321368   | 0.226685  | 0.820669 | 0.984151 |
| gene913 | gene913 | SACOL0926 | gi 57650036 ref NC_002951.2 :931824-933144 | q1 | q2 | OK       | 80.2672 | 64.6479 | -0.312208   | 0.302621  | 0.762178 | 0.978191 |
| gene914 | gene914 | lipA      | gi 57650036 ref NC_002951.2 :933227-934145 | q1 | q2 | OK       | 567.539 | 269.369 | -1.07513    | 0.942685  | 0.345842 | 0.93284  |
| gene915 | gene915 | SACOL0928 | gi 57650036 ref NC_002951.2 :934265-934658 | q1 | q2 | OK       | 416.939 | 63.779  | -2.70868    | 1.87948   | 0.060179 | 0.707666 |
| gene916 | gene916 | SACOL0929 | gi 57650036 ref NC_002951.2 :934736-934994 | q1 | q2 | OK       | 264.349 | 45.5198 | -2.53788    | 1.33397   | 0.182214 | 0.842707 |
| gene917 | gene917 | SACOL0930 | gi 57650036 ref NC_002951.2 :935100-936314 | q1 | q2 | OK       | 193.32  | 73.2632 | -1.39983    | 0.791726  | 0.42852  | 0.954672 |
| gene918 | gene918 | SACOL0931 | gi 57650036 ref NC_002951.2 :935100-936314 | q1 | q2 | OK       | 78.7001 | 78.1692 | -0.00976424 | 0.007235  | 0.994227 | 0.998672 |
| gene919 | gene919 | SACOL0932 | gi 57650036 ref NC_002951.2 :936346-937306 | q1 | q2 | OK       | 96.3016 | 70.6688 | -0.446487   | 0.405792  | 0.684895 | 0.978191 |
| gene92  | gene92  | sarS      | gi 57650036 ref NC_002951.2 :109310-110063 | q1 | q2 | OK       | 189.637 | 52.9746 | -1.83987    | 1.45999   | 0.144294 | 0.842707 |
| gene920 | gene920 | SACOL0933 | gi 57650036 ref NC_002951.2 :937559-937670 | q1 | q2 | NOTEST 0 |         | 0       | 0           | 0         | 1        | 1        |
| gene921 | gene921 | SACOL0934 | gi 57650036 ref NC_002951.2 :937717-937870 | q1 | q2 | OK       | 213.652 | 378.774 | 0.826072    | -0.3695   | 0.711758 | 0.978191 |
| gene922 | gene922 | dltA      | gi 57650036 ref NC_002951.2 :937885-940554 | q1 | q2 | OK       | 125.975 | 280.476 | 1.15474     | -0.75445  | 0.450579 | 0.956269 |
| gene923 | gene923 | dltB      | gi 57650036 ref NC_002951.2 :937885-940554 | q1 | q2 | OK       | 124.75  | 164.755 | 0.401285    | -0.20186  | 0.840028 | 0.984151 |
| gene924 | gene924 | dltC      | gi 57650036 ref NC_002951.2 :940571-941980 | q1 | q2 | OK       | 167.511 | 571.894 | 1.77149     | -0.43328  | 0.664809 | 0.978191 |
| gene925 | gene925 | dltD      | gi 57650036 ref NC_002951.2 :940571-941980 | q1 | q2 | OK       | 181.667 | 166.863 | -0.12263    | 0.104455  | 0.916808 | 0.984151 |
| gene926 | gene926 | SACOL0939 | gi 57650036 ref NC_002951.2 :942242-942464 | q1 | q2 | OK       | 252.294 | 115.164 | -1.13142    | 0.586537  | 0.557515 | 0.976548 |
| gene927 | gene927 | SACOL0940 | gi 57650036 ref NC_002951.2 :942585-942909 | q1 | q2 | OK       | 196.527 | 129.916 | -0.597146   | 0.36667   | 0.713865 | 0.978191 |
| gene928 | gene928 | SACOL0941 | gi 57650036 ref NC_002951.2 :942969-944032 | q1 | q2 | OK       | 135.634 | 86.8807 | -0.642609   | 0.627971  | 0.530023 | 0.963286 |
| gene929 | gene929 | SACOL0942 | gi 57650036 ref NC_002951.2 :944348-944585 | q1 | q2 | OK       | 789.695 | 642.224 | -0.298219   | 0.216476  | 0.828617 | 0.984151 |
| gene93  | gene93  | sirC      | gi 57650036 ref NC_002951.2 :110431-112422 | q1 | q2 | OK       | 169.969 | 58.4928 | -1.53894    | 1.34995   | 0.177033 | 0.842707 |
| gene930 | gene930 | SACOL0943 | gi 57650036 ref NC_002951.2 :944597-944957 | q1 | q2 | OK       | 356.116 | 230.465 | -0.627802   | 0.502438  | 0.615359 | 0.978191 |
| gene931 | gene931 | SACOL0944 | gi 57650036 ref NC_002951.2 :945410-946619 | q1 | q2 | OK       | 275.947 | 71.5367 | -1.94764    | 1.79145   | 0.073221 | 0.754145 |
| gene932 | gene932 | SACOL0945 | gi 57650036 ref NC_002951.2 :946749-948225 | q1 | q2 | OK       | 123.312 | 78.5774 | -0.650128   | 0.63764   | 0.523708 | 0.963286 |
| gene933 | gene933 | SACOL0946 | gi 57650036 ref NC_002951.2 :948635-949952 | q1 | q2 | OK       | 12.3075 | 52.8981 | 2.10367     | -1.43978  | 0.149931 | 0.842707 |
| gene934 | gene934 | SACOL0947 | gi 57650036 ref NC_002951.2 :949970-950345 | q1 | q2 | OK       | 91.6284 | 68.643  | -0.416683   | 0.239377  | 0.810813 | 0.984151 |



|         |         |           |                                            |    |    |    |         |         |             |             |          |          |
|---------|---------|-----------|--------------------------------------------|----|----|----|---------|---------|-------------|-------------|----------|----------|
| gene935 | gene935 | SACOL0948 | gi 57650036 ref NC_002951.2 :950400-951555 | q1 | q2 | OK | 2.98138 | 30.4211 | 3.35102     | -1.82943    | 0.067336 | 0.733049 |
| gene936 | gene936 | mnhG      | gi 57650036 ref NC_002951.2 :951803-952910 | q1 | q2 | OK | 191.807 | 47.2476 | -2.02134    | 0.867975    | 0.385408 | 0.940893 |
| gene937 | gene937 | mnhF      | gi 57650036 ref NC_002951.2 :951803-952910 | q1 | q2 | OK | 25.5865 | 36.8947 | 0.528032    | -0.10503    | 0.916356 | 0.984151 |
| gene938 | gene938 | mnhE      | gi 57650036 ref NC_002951.2 :951803-952910 | q1 | q2 | OK | 123.165 | 65.3732 | -0.913824   | 0.537261    | 0.591087 | 0.978191 |
| gene939 | gene939 | mnhD      | gi 57650036 ref NC_002951.2 :952911-957568 | q1 | q2 | OK | 136.543 | 63.2561 | -1.11008    | 0.454731    | 0.649302 | 0.978191 |
| gene94  | gene94  | sirB      | gi 57650036 ref NC_002951.2 :110431-112422 | q1 | q2 | OK | 1.65927 | 13.3783 | 3.01127     | -0.39879    | 0.690046 | 0.978191 |
| gene940 | gene940 | mnhC      | gi 57650036 ref NC_002951.2 :952911-957568 | q1 | q2 | OK | 114.3   | 121.917 | 0.0930759   | -0.01357    | 0.98917  | 0.997969 |
| gene941 | gene941 | mnhB      | gi 57650036 ref NC_002951.2 :952911-957568 | q1 | q2 | OK | 113.925 | 57.036  | -0.998136   | 0.15937     | 0.873377 | 0.984151 |
| gene942 | gene942 | mnhA      | gi 57650036 ref NC_002951.2 :952911-957568 | q1 | q2 | OK | 162.278 | 117.314 | -0.468095   | 0.304724    | 0.760576 | 0.978191 |
| gene943 | gene943 | kapB      | gi 57650036 ref NC_002951.2 :957698-958082 | q1 | q2 | OK | 95.9887 | 56.1347 | -0.77397    | 0.442645    | 0.658022 | 0.978191 |
| gene944 | gene944 | SACOL0957 | gi 57650036 ref NC_002951.2 :958145-958739 | q1 | q2 | OK | 175.884 | 133.548 | -0.397265   | 0.357311    | 0.720859 | 0.978191 |
| gene945 | gene945 | SACOL0958 | gi 57650036 ref NC_002951.2 :959154-959532 | q1 | q2 | OK | 857.347 | 241.702 | -1.82665    | 1.62518     | 0.104124 | 0.816291 |
| gene946 | gene946 | SACOL0959 | gi 57650036 ref NC_002951.2 :959893-961021 | q1 | q2 | OK | 178.791 | 181.817 | 0.0242159   | -0.02331    | 0.981402 | 0.997969 |
| gene947 | gene947 | rocD      | gi 57650036 ref NC_002951.2 :961328-962519 | q1 | q2 | OK | 722.465 | 559.67  | -0.368352   | 0.283879    | 0.776503 | 0.981157 |
| gene948 | gene948 | gluD      | gi 57650036 ref NC_002951.2 :962627-963872 | q1 | q2 | OK | 1469.13 | 771.474 | -0.929273   | 0.684947    | 0.493377 | 0.963286 |
| gene949 | gene949 | SACOL0962 | gi 57650036 ref NC_002951.2 :964374-965304 | q1 | q2 | OK | 76.2007 | 45.3756 | -0.747889   | 0.580376    | 0.561661 | 0.976548 |
| gene95  | gene95  | sirA      | gi 57650036 ref NC_002951.2 :112437-113430 | q1 | q2 | OK | 6.66298 | 34.6776 | 2.37977     | -1.34796    | 0.177672 | 0.842707 |
| gene950 | gene950 | argH      | gi 57650036 ref NC_002951.2 :965545-968120 | q1 | q2 | OK | 15.3313 | 37.2332 | 1.28011     | -0.80431    | 0.421217 | 0.949284 |
| gene951 | gene951 | argG      | gi 57650036 ref NC_002951.2 :965545-968120 | q1 | q2 | OK | 3.91376 | 37.6798 | 3.26716     | -1.13394    | 0.256819 | 0.892956 |
| gene952 | gene952 | SACOL0965 | gi 57650036 ref NC_002951.2 :968264-968399 | q1 | q2 | OK | 0       | 40.3683 | 1.79769e+30 | 1.79769e+30 | 0.207933 | 0.842707 |
| gene953 | gene953 | pgi       | gi 57650036 ref NC_002951.2 :968470-969802 | q1 | q2 | OK | 321.062 | 122.339 | -1.39197    | 1.25555     | 0.209278 | 0.842707 |
| gene954 | gene954 | SACOL0967 | gi 57650036 ref NC_002951.2 :970126-970702 | q1 | q2 | OK | 76.9754 | 39.2121 | -0.973098   | 0.603524    | 0.54616  | 0.97151  |
| gene955 | gene955 | spsA      | gi 57650036 ref NC_002951.2 :970706-971231 | q1 | q2 | OK | 174.994 | 56.78   | -1.62385    | 1.1449      | 0.25225  | 0.889805 |
| gene956 | gene956 | spsB      | gi 57650036 ref NC_002951.2 :971237-971822 | q1 | q2 | OK | 249.411 | 41.7483 | -2.57874    | 1.85811     | 0.063154 | 0.717594 |
| gene957 | gene957 | rexB      | gi 57650036 ref NC_002951.2 :971981-975458 | q1 | q2 | OK | 64.7367 | 69.7791 | 0.108212    | -0.09998    | 0.92036  | 0.984745 |
| gene958 | gene958 | rexA      | gi 57650036 ref NC_002951.2 :975458-979112 | q1 | q2 | OK | 64.6344 | 51.2788 | -0.333939   | 0.313436    | 0.75395  | 0.978191 |
| gene959 | gene959 | SACOL0973 | gi 57650036 ref NC_002951.2 :979277-980180 | q1 | q2 | OK | 663.071 | 247.554 | -1.42142    | 1.23821     | 0.215638 | 0.850298 |
| gene96  | gene96  | SACOL0100 | gi 57650036 ref NC_002951.2 :113693-114641 | q1 | q2 | OK | 0       | 19.6006 | 1.79769e+30 | 1.79769e+30 | 0.116854 | 0.838847 |
| gene960 | gene960 | SACOL0974 | gi 57650036 ref NC_002951.2 :980508-980898 | q1 | q2 | OK | 210.789 | 87.1171 | -1.27477    | 0.834714    | 0.403879 | 0.940909 |
| gene961 | gene961 | SACOL0975 | gi 57650036 ref NC_002951.2 :981068-982385 | q1 | q2 | OK | 173.282 | 182.256 | 0.0728439   | -0.06851    | 0.94538  | 0.987716 |
| gene962 | gene962 | SACOL0976 | gi 57650036 ref NC_002951.2 :982436-983261 | q1 | q2 | OK | 141.716 | 239.295 | 0.755789    | -0.73709    | 0.461069 | 0.956269 |
| gene963 | gene963 | SACOL0977 | gi 57650036 ref NC_002951.2 :983374-983683 | q1 | q2 | OK | 918.131 | 174.47  | -2.39572    | 1.79397     | 0.072819 | 0.754145 |
| gene964 | gene964 | SACOL0978 | gi 57650036 ref NC_002951.2 :984229-986044 | q1 | q2 | OK | 3.22138 | 25.6283 | 2.99199     | -1.7805     | 0.074994 | 0.754145 |

|         |         |           |                                              |    |    |          |          |         |           |          |          |          |
|---------|---------|-----------|----------------------------------------------|----|----|----------|----------|---------|-----------|----------|----------|----------|
| gene965 | gene965 | clpB      | gi 57650036 ref NC_002951.2 :986246-988856   | q1 | q2 | OK       | 57.1069  | 77.4249 | 0.439133  | -0.4236  | 0.671858 | 0.978191 |
| gene966 | gene966 | SACOL0980 | gi 57650036 ref NC_002951.2 :988914-989784   | q1 | q2 | OK       | 1.98271  | 19.8268 | 3.32191   | -1.64161 | 0.10067  | 0.815096 |
| gene967 | gene967 | SACOL0981 | gi 57650036 ref NC_002951.2 :989893-993274   | q1 | q2 | OK       | 0.694723 | 21.9324 | 4.98048   | -1.1196  | 0.262886 | 0.900241 |
| gene968 | gene968 | SACOL0982 | gi 57650036 ref NC_002951.2 :989893-993274   | q1 | q2 | OK       | 2.04209  | 17.4789 | 3.0975    | -0.72596 | 0.467862 | 0.956269 |
| gene969 | gene969 | SACOL0983 | gi 57650036 ref NC_002951.2 :989893-993274   | q1 | q2 | OK       | 2.62413  | 23.5802 | 3.16767   | -1.23276 | 0.217667 | 0.850298 |
| gene97  | gene97  | SACOL0101 | gi 57650036 ref NC_002951.2 :114649-115648   | q1 | q2 | OK       | 0.550952 | 27.1759 | 5.62426   | -2.7293  | 0.006347 | 0.461354 |
| gene970 | gene970 | SACOL0984 | gi 57650036 ref NC_002951.2 :989893-993274   | q1 | q2 | OK       | 7.30218  | 40.8825 | 2.48508   | -0.87044 | 0.38406  | 0.940893 |
| gene971 | gene971 | SACOL0985 | gi 57650036 ref NC_002951.2 :993584-994019   | q1 | q2 | OK       | 119.818  | 61.1225 | -0.971069 | 0.597865 | 0.54993  | 0.974547 |
| gene972 | gene972 | SACOL0986 | gi 57650036 ref NC_002951.2 :994275-994461   | q1 | q2 | OK       | 3505.05  | 251.56  | -3.80046  | 2.32748  | 0.01994  | 0.517412 |
| gene973 | gene973 | fabH      | gi 57650036 ref NC_002951.2 :994755-995697   | q1 | q2 | OK       | 64.5212  | 52.8667 | -0.287413 | 0.225713 | 0.821424 | 0.984151 |
| gene974 | gene974 | fabF      | gi 57650036 ref NC_002951.2 :995708-996953   | q1 | q2 | OK       | 219.585  | 120.325 | -0.867841 | 0.826191 | 0.408696 | 0.940909 |
| gene975 | gene975 | SACOL0989 | gi 57650036 ref NC_002951.2 :997007-997379   | q1 | q2 | OK       | 32.5324  | 22.8712 | -0.508347 | 0.251681 | 0.801288 | 0.984151 |
| gene976 | gene976 | SACOL0990 | gi 57650036 ref NC_002951.2 :997601-999618   | q1 | q2 | NOTEST 0 |          | 0       | 0         | 0        | 1        | 1        |
| gene977 | gene977 | oppB      | gi 57650036 ref NC_002951.2 :997601-999618   | q1 | q2 | OK       | 187.51   | 87.9898 | -1.09156  | 0.623633 | 0.532868 | 0.963286 |
| gene978 | gene978 | oppC      | gi 57650036 ref NC_002951.2 :997601-999618   | q1 | q2 | OK       | 179.726  | 129.029 | -0.478108 | 0.342983 | 0.731611 | 0.978191 |
| gene979 | gene979 | oppD      | gi 57650036 ref NC_002951.2 :999634-1001648  | q1 | q2 | OK       | 334.052  | 213.668 | -0.644703 | 0.431974 | 0.66576  | 0.978191 |
| gene98  | gene98  | SACOL0102 | gi 57650036 ref NC_002951.2 :115668-124110   | q1 | q2 | OK       | 0.836899 | 20.6938 | 4.628     | -0.89547 | 0.370536 | 0.93402  |
| gene980 | gene980 | oppF      | gi 57650036 ref NC_002951.2 :999634-1001648  | q1 | q2 | OK       | 216.756  | 146.079 | -0.569319 | 0.284942 | 0.775688 | 0.981122 |
| gene981 | gene981 | SACOL0995 | gi 57650036 ref NC_002951.2 :1001665-1003321 | q1 | q2 | OK       | 373.703  | 165.632 | -1.17391  | 0.985806 | 0.324228 | 0.927653 |
| gene982 | gene982 | SACOL0996 | gi 57650036 ref NC_002951.2 :1003532-1005248 | q1 | q2 | OK       | 1.14503  | 34.5171 | 4.91386   | -2.77445 | 0.005529 | 0.446636 |
| gene983 | gene983 | SACOL0997 | gi 57650036 ref NC_002951.2 :1005298-1006285 | q1 | q2 | OK       | 0.839418 | 28.632  | 5.0921    | -2.51179 | 0.012012 | 0.500083 |
| gene984 | gene984 | SACOL0998 | gi 57650036 ref NC_002951.2 :1006287-1008223 | q1 | q2 | OK       | 1.41011  | 23.6865 | 4.07018   | -1.17372 | 0.240506 | 0.879153 |
| gene985 | gene985 | SACOL0999 | gi 57650036 ref NC_002951.2 :1006287-1008223 | q1 | q2 | OK       | 6.06665  | 31.5433 | 2.37836   | -1.21366 | 0.224879 | 0.854232 |
| gene986 | gene986 | SACOL1000 | gi 57650036 ref NC_002951.2 :1008234-1009116 | q1 | q2 | OK       | 8.11072  | 42.2965 | 2.38264   | -1.36078 | 0.173582 | 0.842707 |
| gene987 | gene987 | trpS      | gi 57650036 ref NC_002951.2 :1009157-1010147 | q1 | q2 | OK       | 132.945  | 59.1449 | -1.1685   | 1.04613  | 0.295499 | 0.924214 |
| gene988 | gene988 | spxA      | gi 57650036 ref NC_002951.2 :1010441-1010837 | q1 | q2 | OK       | 28010.2  | 9625.03 | -1.54109  | 1.12147  | 0.262086 | 0.899266 |
| gene989 | gene989 | SACOL1003 | gi 57650036 ref NC_002951.2 :1011207-1011927 | q1 | q2 | OK       | 173.413  | 87.4875 | -0.987062 | 0.876145 | 0.380951 | 0.940893 |
| gene99  | gene99  | SACOL0103 | gi 57650036 ref NC_002951.2 :115668-124110   | q1 | q2 | OK       | 0.826802 | 38.1527 | 5.5281    | -0.9079  | 0.363932 | 0.93284  |
| gene990 | gene990 | SACOL1004 | gi 57650036 ref NC_002951.2 :1012047-1013034 | q1 | q2 | OK       | 1.39903  | 27.844  | 4.31487   | -2.17972 | 0.029278 | 0.604847 |
| gene991 | gene991 | pepF      | gi 57650036 ref NC_002951.2 :1013081-1014890 | q1 | q2 | OK       | 131.364  | 72.4917 | -0.857683 | 0.823658 | 0.410134 | 0.940909 |
| gene992 | gene992 | SACOL1006 | gi 57650036 ref NC_002951.2 :1015349-1016156 | q1 | q2 | OK       | 217.851  | 175.297 | -0.313541 | 0.310164 | 0.756436 | 0.978191 |
| gene993 | gene993 | SACOL1007 | gi 57650036 ref NC_002951.2 :1016178-1016544 | q1 | q2 | OK       | 180.745  | 182.613 | 0.0148319 | -0.01007 | 0.991964 | 0.997969 |
| gene994 | gene994 | SACOL1008 | gi 57650036 ref NC_002951.2 :1016647-1017241 | q1 | q2 | OK       | 91.1137  | 25.9391 | -1.81254  | 1.11641  | 0.264246 | 0.901051 |

---

|         |         |           |                                              |    |    |    |         |         |           |          |          |          |
|---------|---------|-----------|----------------------------------------------|----|----|----|---------|---------|-----------|----------|----------|----------|
| gene995 | gene995 | SACOL1009 | gi 57650036 ref NC_002951.2 :1017426-1017774 | q1 | q2 | OK | 109.505 | 61.9462 | -0.821916 | 0.46258  | 0.643666 | 0.978191 |
| gene996 | gene996 | relA1     | gi 57650036 ref NC_002951.2 :1017790-1018426 | q1 | q2 | OK | 119.129 | 67.1125 | -0.827866 | 0.618051 | 0.536542 | 0.963603 |
| gene997 | gene997 | ppnK      | gi 57650036 ref NC_002951.2 :1018442-1020103 | q1 | q2 | OK | 183.588 | 83.3561 | -1.13911  | 0.921424 | 0.356829 | 0.93284  |
| gene998 | gene998 | SACOL1012 | gi 57650036 ref NC_002951.2 :1018442-1020103 | q1 | q2 | OK | 61.9092 | 41.4811 | -0.5777   | 0.309019 | 0.757307 | 0.978191 |
| gene999 | gene999 | mgtE      | gi 57650036 ref NC_002951.2 :1020123-1021509 | q1 | q2 | OK | 68.1755 | 77.4311 | 0.183659  | -0.17967 | 0.857413 | 0.984151 |

---

**Supplementary Table S6. Results of Cuffdiff analysis of RNA-seq data for all annotated MRSA genes in MVR, MR150 and M36C05, related to Figure 2c**

| test_id  | gene_id  | gene      | locus                                        | sample_1 | sample_2 | status | value_1 | value_2 | log2(fold_c<br>hange) | test_stat   | p_value | q_value  |
|----------|----------|-----------|----------------------------------------------|----------|----------|--------|---------|---------|-----------------------|-------------|---------|----------|
| gene0    | gene0    | dnaA      | gi 57650036 ref NC_002951.2 :543-1905        | MVR      | MR150    | OK     | 40.8055 | 58.652  | 0.523418              | -0.678223   | 0.49763 | 0.999883 |
| gene1    | gene1    | dnaN      | gi 57650036 ref NC_002951.2 :2182-3316       | MVR      | MR150    | OK     | 71.5909 | 101.985 | 0.510515              | -0.636856   | 0.52422 | 0.999883 |
| gene10   | gene10   | SACOL0011 | gi 57650036 ref NC_002951.2 :14748-15770     | MVR      | MR150    | OK     | 6.99565 | 14.7443 | 1.07563               | -0.700357   | 0.4837  | 0.999883 |
| gene100  | gene100  | SACOL0104 | gi 57650036 ref NC_002951.2 :115668-124110   | MVR      | MR150    | OK     | 1.12105 | 0.19931 | -2.4918               | 0.966455    | 0.33382 | 0.999883 |
| gene1000 | gene1000 | SACOL1014 | gi 57650036 ref NC_002951.2 :1021518-1023363 | MVR      | MR150    | OK     | 35.1437 | 31.4718 | -0.159207             | 0.207348    | 0.83574 | 0.999883 |
| gene1001 | gene1001 | fabI      | gi 57650036 ref NC_002951.2 :1023640-1024411 | MVR      | MR150    | OK     | 192.938 | 173.481 | -0.15336              | 0.185517    | 0.85282 | 0.999883 |
| gene1002 | gene1002 | SACOL1017 | gi 57650036 ref NC_002951.2 :1024605-1025691 | MVR      | MR150    | OK     | 79.3075 | 77.0879 | -0.0409521            | 0.051998    | 0.95853 | 0.999883 |
| gene1003 | gene1003 | SACOL1018 | gi 57650036 ref NC_002951.2 :1026032-1027601 | MVR      | MR150    | OK     | 45.4413 | 36.3605 | -0.321629             | 0.418056    | 0.67591 | 0.999883 |
| gene1004 | gene1004 | SACOL1019 | gi 57650036 ref NC_002951.2 :1027742-1028501 | MVR      | MR150    | OK     | 16.5023 | 15.6113 | -0.0800773            | 0.117762    | 0.90626 | 0.999883 |
| gene1005 | gene1005 | SACOL1020 | gi 57650036 ref NC_002951.2 :1028694-1029204 | MVR      | MR150    | OK     | 603.19  | 599.099 | -0.0098199            | 0.011147    | 0.99111 | 0.999883 |
| gene1006 | gene1006 | SACOL1021 | gi 57650036 ref NC_002951.2 :1029316-1031660 | MVR      | MR150    | OK     | 43.8463 | 57.9512 | 0.402382              | -0.273464   | 0.7845  | 0.999883 |
| gene1007 | gene1007 | ypfP      | gi 57650036 ref NC_002951.2 :1029316-1031660 | MVR      | MR150    | OK     | 91.3469 | 106.072 | 0.21561               | -0.203099   | 0.83906 | 0.999883 |
| gene1008 | gene1008 | murE      | gi 57650036 ref NC_002951.2 :1032092-1035380 | MVR      | MR150    | OK     | 37.8437 | 35.8406 | -0.078459             | 0.057554    | 0.9541  | 0.999883 |
| gene1009 | gene1009 | SACOL1024 | gi 57650036 ref NC_002951.2 :1032092-1035380 | MVR      | MR150    | OK     | 60.0679 | 42.368  | -0.503619             | 0.096245    | 0.92333 | 0.999883 |
| gene101  | gene101  | SACOL0105 | gi 57650036 ref NC_002951.2 :115668-124110   | MVR      | MR150    | OK     | 2.93381 | 1.35804 | -1.11125              | 0.944085    | 0.34513 | 0.999883 |
| gene1010 | gene1010 | prfC      | gi 57650036 ref NC_002951.2 :1032092-1035380 | MVR      | MR150    | OK     | 50.5369 | 55.8484 | 0.144177              | -0.131067   | 0.89572 | 0.999883 |
| gene1011 | gene1011 | SACOL1026 | gi 57650036 ref NC_002951.2 :1035681-1036485 | MVR      | MR150    | OK     | 27.6224 | 23.5746 | -0.228607             | 0.332426    | 0.73957 | 0.999883 |
| gene1012 | gene1012 | SACOL1027 | gi 57650036 ref NC_002951.2 :1036543-1036639 | MVR      | MR150    | NOTEST | 0       | 0       | 0                     | 0           | 1       | 1        |
| gene1013 | gene1013 | htrA      | gi 57650036 ref NC_002951.2 :1036718-1039028 | MVR      | MR150    | OK     | 13.2908 | 17.7133 | 0.414404              | -0.569261   | 0.56918 | 0.999883 |
| gene1014 | gene1014 | SACOL1030 | gi 57650036 ref NC_002951.2 :1039044-1040403 | MVR      | MR150    | OK     | 50.446  | 58.6716 | 0.217923              | -0.279516   | 0.77985 | 0.999883 |
| gene1015 | gene1015 | SACOL1031 | gi 57650036 ref NC_002951.2 :1040541-1042053 | MVR      | MR150    | OK     | 21.2057 | 22.2969 | 0.072389              | -0.100816   | 0.9197  | 0.999883 |
| gene1018 | gene1018 | SACOL1032 | gi 57650036 ref NC_002951.2 :1042539-1043070 | MVR      | MR150    | OK     | 2.47276 | 2.31133 | -0.0974003            | 0.108456    | 0.91363 | 0.999883 |
| gene1019 | gene1019 | SACOL1033 | gi 57650036 ref NC_002951.2 :1043318-1043537 | MVR      | MR150    | OK     | 585.86  | 573.859 | -0.0298595            | 0.042314    | 0.96625 | 0.999883 |
| gene102  | gene102  | SACOL0106 | gi 57650036 ref NC_002951.2 :115668-124110   | MVR      | MR150    | OK     | 2.74902 | 2.12276 | -0.372978             | 0.204291    | 0.83813 | 0.999883 |
| gene1020 | gene1020 | SACOL1034 | gi 57650036 ref NC_002951.2 :1043617-1044604 | MVR      | MR150    | OK     | 23.9888 | 20.0412 | -0.259391             | 0.375252    | 0.70747 | 0.999883 |
| gene1021 | gene1021 | SACOL1035 | gi 57650036 ref NC_002951.2 :1044802-1044979 | MVR      | MR150    | OK     | 133.854 | 286.672 | 1.09874               | -1.52398    | 0.12751 | 0.707889 |
| gene1022 | gene1022 | SACOL1036 | gi 57650036 ref NC_002951.2 :1044993-1045596 | MVR      | MR150    | OK     | 374.598 | 386.258 | 0.0442213             | -0.051214   | 0.95916 | 0.999883 |
| gene1023 | gene1023 | SACOL1037 | gi 57650036 ref NC_002951.2 :1045867-1045975 | MVR      | MR150    | NOTEST | 0       | 0       | 0                     | 0           | 1       | 1        |
| gene1024 | gene1024 | SACOL1038 | gi 57650036 ref NC_002951.2 :1046940-1048905 | MVR      | MR150    | OK     | 1.3774  | 0.60748 | -1.18105              | 1.50535     | 0.13223 | 0.721045 |
| gene1025 | gene1025 | SACOL1039 | gi 57650036 ref NC_002951.2 :1048907-1049866 | MVR      | MR150    | NOTEST | 0.53302 | 0       | -1.79769e+3           | -1.79769e+3 | 0.27986 | 1        |

|          |          |           |                                              |     |       |        |         |         |            |           |         |          |
|----------|----------|-----------|----------------------------------------------|-----|-------|--------|---------|---------|------------|-----------|---------|----------|
| gene1026 | gene1026 | SACOL1040 | gi 57650036 ref NC_002951.2 :1048907-1049866 | MVR | MR150 | OK     | 2.23763 | 1.03896 | -1.10684   | 1.11758   | 0.26375 | 0.945311 |
| gene1027 | gene1027 | SACOL1041 | gi 57650036 ref NC_002951.2 :1049953-1050244 | MVR | MR150 | OK     | 52.7907 | 57.8526 | 0.1321     | -0.191699 | 0.84798 | 0.999883 |
| gene1028 | gene1028 | SACOL1042 | gi 57650036 ref NC_002951.2 :1050522-1050810 | MVR | MR150 | OK     | 20.1498 | 21.8659 | 0.11792    | -0.156084 | 0.87597 | 0.999883 |
| gene1029 | gene1029 | SACOL1043 | gi 57650036 ref NC_002951.2 :1050815-1052297 | MVR | MR150 | OK     | 31.335  | 34.2875 | 0.129909   | -0.173787 | 0.86203 | 0.999883 |
| gene103  | gene103  | SACOL0107 | gi 57650036 ref NC_002951.2 :115668-124110   | MVR | MR150 | OK     | 3.5842  | 1.67957 | -1.09356   | 0.818937  | 0.41282 | 0.999883 |
| gene1030 | gene1030 | SACOL1044 | gi 57650036 ref NC_002951.2 :1052385-1052742 | MVR | MR150 | OK     | 45.9306 | 87.0651 | 0.92264    | -1.34834  | 0.17755 | 0.821737 |
| gene1031 | gene1031 | SACOL1045 | gi 57650036 ref NC_002951.2 :1053218-1054178 | MVR | MR150 | OK     | 6.59452 | 4.63413 | -0.508968  | 0.72909   | 0.46595 | 0.999883 |
| gene1032 | gene1032 | SACOL1046 | gi 57650036 ref NC_002951.2 :1054223-1054355 | MVR | MR150 | OK     | 124.552 | 504.02  | 2.01674    | -1.79469  | 0.0727  | 0.528391 |
| gene1033 | gene1033 | SACOL1047 | gi 57650036 ref NC_002951.2 :1054418-1054709 | MVR | MR150 | OK     | 52.1139 | 70.0321 | 0.42635    | -0.620113 | 0.53518 | 0.999883 |
| gene1034 | gene1034 | SACOL1048 | gi 57650036 ref NC_002951.2 :1054852-1055350 | MVR | MR150 | OK     | 27.8892 | 30.2844 | 0.118865   | -0.174726 | 0.8613  | 0.999883 |
| gene1035 | gene1035 | menA      | gi 57650036 ref NC_002951.2 :1055401-1056340 | MVR | MR150 | OK     | 37.0485 | 48.4864 | 0.388164   | -0.53557  | 0.59226 | 0.999883 |
| gene1036 | gene1036 | SACOL1050 | gi 57650036 ref NC_002951.2 :1056490-1056595 | MVR | MR150 | NOTEST | 0       | 0       | 0          | 0         | 1       | 1        |
| gene1037 | gene1037 | SACOL1051 | gi 57650036 ref NC_002951.2 :1056671-1061147 | MVR | MR150 | OK     | 20.0663 | 26.1802 | 0.383705   | -0.13368  | 0.89366 | 0.999883 |
| gene1038 | gene1038 | menD      | gi 57650036 ref NC_002951.2 :1056671-1061147 | MVR | MR150 | OK     | 23.3547 | 31.485  | 0.430956   | -0.197412 | 0.84351 | 0.999883 |
| gene1039 | gene1039 | SACOL1053 | gi 57650036 ref NC_002951.2 :1056671-1061147 | MVR | MR150 | OK     | 23.6908 | 38.5306 | 0.701677   | -0.214821 | 0.82991 | 0.999883 |
| gene104  | gene104  | SACOL0108 | gi 57650036 ref NC_002951.2 :124113-124878   | MVR | MR150 | OK     | 5.18763 | 4.06465 | -0.351945  | 0.483177  | 0.62897 | 0.999883 |
| gene1040 | gene1040 | menB      | gi 57650036 ref NC_002951.2 :1056671-1061147 | MVR | MR150 | OK     | 238.287 | 254.036 | 0.0923353  | -0.082259 | 0.93444 | 0.999883 |
| gene1041 | gene1041 | sspC      | gi 57650036 ref NC_002951.2 :1061385-1061715 | MVR | MR150 | OK     | 6.49596 | 4.53671 | -0.517896  | 0.560807  | 0.57493 | 0.999883 |
| gene1042 | gene1042 | sspB1     | gi 57650036 ref NC_002951.2 :1061752-1062934 | MVR | MR150 | OK     | 3.17438 | 4.36666 | 0.460058   | -0.65244  | 0.51412 | 0.999883 |
| gene1043 | gene1043 | sspA      | gi 57650036 ref NC_002951.2 :1063015-1064026 | MVR | MR150 | OK     | 4.97844 | 3.58757 | -0.472687  | 0.666938  | 0.50481 | 0.999883 |
| gene1044 | gene1044 | SACOL1058 | gi 57650036 ref NC_002951.2 :1064553-1065708 | MVR | MR150 | OK     | 40.5789 | 41.0521 | 0.0167266  | -0.02256  | 0.982   | 0.999883 |
| gene1045 | gene1045 | SACOL1059 | gi 57650036 ref NC_002951.2 :1065903-1066914 | MVR | MR150 | OK     | 12.0374 | 7.93042 | -0.602058  | 0.883349  | 0.37705 | 0.999883 |
| gene1046 | gene1046 | SACOL1060 | gi 57650036 ref NC_002951.2 :1067066-1067486 | MVR | MR150 | OK     | 28.6067 | 35.3517 | 0.305427   | -0.447096 | 0.65481 | 0.999883 |
| gene1047 | gene1047 | atl       | gi 57650036 ref NC_002951.2 :1067692-1071463 | MVR | MR150 | OK     | 557.285 | 494.397 | -0.172745  | 0.180347  | 0.85688 | 0.999883 |
| gene1048 | gene1048 | SACOL1063 | gi 57650036 ref NC_002951.2 :1071690-1072125 | MVR | MR150 | OK     | 18.1401 | 16.2416 | -0.159484  | 0.227597  | 0.81996 | 0.999883 |
| gene1049 | gene1049 | SACOL1064 | gi 57650036 ref NC_002951.2 :1072279-1072750 | MVR | MR150 | OK     | 531.705 | 515.641 | -0.0442592 | 0.051779  | 0.95871 | 0.999883 |
| gene105  | gene105  | SACOL0109 | gi 57650036 ref NC_002951.2 :125073-125481   | MVR | MR150 | NOTEST | 0       | 0       | 0          | 0         | 1       | 1        |
| gene1050 | gene1050 | SACOL1065 | gi 57650036 ref NC_002951.2 :1072797-1074015 | MVR | MR150 | OK     | 157.326 | 139.758 | -0.170824  | 0.197777  | 0.84322 | 0.999883 |
| gene1051 | gene1051 | SACOL1066 | gi 57650036 ref NC_002951.2 :1074465-1075659 | MVR | MR150 | OK     | 31.532  | 30.9681 | -0.0260347 | 0.03596   | 0.97131 | 0.999883 |
| gene1052 | gene1052 | qoxD      | gi 57650036 ref NC_002951.2 :1076195-1076474 | MVR | MR150 | OK     | 1734.84 | 1757.72 | 0.018905   | -0.021935 | 0.9825  | 0.999883 |
| gene1053 | gene1053 | qoxC      | gi 57650036 ref NC_002951.2 :1076482-1080166 | MVR | MR150 | OK     | 462.55  | 434.301 | -0.0909135 | 0.035279  | 0.97186 | 0.999883 |
| gene1054 | gene1054 | qoxA      | gi 57650036 ref NC_002951.2 :1076482-1080166 | MVR | MR150 | OK     | 444.685 | 370.129 | -0.264756  | 0.207697  | 0.83547 | 0.999883 |
| gene1055 | gene1055 | qoxB      | gi 57650036 ref NC_002951.2 :1076482-1080166 | MVR | MR150 | OK     | 398.026 | 354.04  | -0.168948  | 0.09019   | 0.92814 | 0.999883 |

|          |          |           |                                              |     |       |        |         |         |            |           |         |          |
|----------|----------|-----------|----------------------------------------------|-----|-------|--------|---------|---------|------------|-----------|---------|----------|
| gene1056 | gene1056 | SACOL1071 | gi 57650036 ref NC_002951.2 :1080737-1081055 | MVR | MR150 | OK     | 160.764 | 146.726 | -0.131815  | 0.190332  | 0.84905 | 0.999883 |
| gene1057 | gene1057 | folD      | gi 57650036 ref NC_002951.2 :1081860-1082721 | MVR | MR150 | OK     | 196.9   | 171.416 | -0.199959  | 0.23749   | 0.81228 | 0.999883 |
| gene1058 | gene1058 | purE      | gi 57650036 ref NC_002951.2 :1082921-1084515 | MVR | MR150 | OK     | 157.985 | 64.3048 | -1.29679   | 0.670049  | 0.50283 | 0.999883 |
| gene1059 | gene1059 | purK      | gi 57650036 ref NC_002951.2 :1082921-1084515 | MVR | MR150 | OK     | 173.755 | 87.2493 | -0.993836  | 1.03469   | 0.30081 | 0.984985 |
| gene106  | gene106  | SACOL0110 | gi 57650036 ref NC_002951.2 :125530-126157   | MVR | MR150 | OK     | 2.32081 | 3.22627 | 0.475239   | -0.574925 | 0.56534 | 0.999883 |
| gene1060 | gene1060 | purC      | gi 57650036 ref NC_002951.2 :1084518-1085486 | MVR | MR150 | OK     | 142.82  | 65.1767 | -1.13177   | 1.22575   | 0.22029 | 0.89416  |
| gene1061 | gene1061 | purS      | gi 57650036 ref NC_002951.2 :1084518-1085486 | MVR | MR150 | OK     | 417.889 | 142.889 | -1.54822   | 1.02474   | 0.30549 | 0.99095  |
| gene1062 | gene1062 | purQ      | gi 57650036 ref NC_002951.2 :1085487-1090825 | MVR | MR150 | OK     | 281.872 | 119.027 | -1.24374   | 0.377775  | 0.7056  | 0.999883 |
| gene1063 | gene1063 | purL      | gi 57650036 ref NC_002951.2 :1085487-1090825 | MVR | MR150 | OK     | 360.076 | 125.08  | -1.52545   | 1.03813   | 0.29921 | 0.981582 |
| gene1064 | gene1064 | purF      | gi 57650036 ref NC_002951.2 :1085487-1090825 | MVR | MR150 | OK     | 364.643 | 112.754 | -1.69331   | 0.903186  | 0.36643 | 0.999883 |
| gene1065 | gene1065 | purM      | gi 57650036 ref NC_002951.2 :1085487-1090825 | MVR | MR150 | OK     | 451.702 | 139.65  | -1.69356   | 0.805523  | 0.42052 | 0.999883 |
| gene1066 | gene1066 | purN      | gi 57650036 ref NC_002951.2 :1090827-1091394 | MVR | MR150 | OK     | 333.041 | 100.915 | -1.72255   | 2.18126   | 0.02916 | 0.324708 |
| gene1067 | gene1067 | purH      | gi 57650036 ref NC_002951.2 :1091408-1092887 | MVR | MR150 | OK     | 280.592 | 83.5847 | -1.74716   | 1.96766   | 0.04911 | 0.435378 |
| gene1068 | gene1068 | purD      | gi 57650036 ref NC_002951.2 :1092908-1094156 | MVR | MR150 | OK     | 480.77  | 123.484 | -1.96103   | 2.15723   | 0.03099 | 0.336223 |
| gene1069 | gene1069 | SACOL1084 | gi 57650036 ref NC_002951.2 :1094420-1096620 | MVR | MR150 | OK     | 6.71965 | 9.33282 | 0.473927   | -0.387471 | 0.69841 | 0.999883 |
| gene107  | gene107  | SACOL0111 | gi 57650036 ref NC_002951.2 :126368-127145   | MVR | MR150 | OK     | 509.943 | 702.367 | 0.461889   | -0.492852 | 0.62212 | 0.999883 |
| gene1070 | gene1070 | SACOL1085 | gi 57650036 ref NC_002951.2 :1094420-1096620 | MVR | MR150 | OK     | 7.85099 | 9.30923 | 0.245787   | -0.295187 | 0.76785 | 0.999883 |
| gene1071 | gene1071 | SACOL1086 | gi 57650036 ref NC_002951.2 :1096634-1097210 | MVR | MR150 | OK     | 6.80657 | 7.3267  | 0.106235   | -0.146095 | 0.88385 | 0.999883 |
| gene1072 | gene1072 | SACOL1087 | gi 57650036 ref NC_002951.2 :1097856-1097991 | MVR | MR150 | NOTEST | 0       | 0       | 0          | 0         | 1       | 1        |
| gene1073 | gene1073 | SACOL1088 | gi 57650036 ref NC_002951.2 :1098142-1099438 | MVR | MR150 | OK     | 192.472 | 183.893 | -0.0657799 | 0.073689  | 0.94126 | 0.999883 |
| gene1074 | gene1074 | SACOL1089 | gi 57650036 ref NC_002951.2 :1099862-1101035 | MVR | MR150 | OK     | 16.6386 | 19.5169 | 0.230188   | -0.332658 | 0.73939 | 0.999883 |
| gene1075 | gene1075 | SACOL1090 | gi 57650036 ref NC_002951.2 :1101088-1101631 | MVR | MR150 | OK     | 40.0997 | 37.4748 | -0.0976678 | 0.142834  | 0.88642 | 0.999883 |
| gene1076 | gene1076 | ptsH      | gi 57650036 ref NC_002951.2 :1101784-1102051 | MVR | MR150 | OK     | 264.897 | 351.212 | 0.406911   | -0.576397 | 0.56435 | 0.999883 |
| gene1077 | gene1077 | ptsI      | gi 57650036 ref NC_002951.2 :1102053-1103772 | MVR | MR150 | OK     | 344.433 | 411.804 | 0.257735   | -0.265566 | 0.79057 | 0.999883 |
| gene1078 | gene1078 | SACOL1093 | gi 57650036 ref NC_002951.2 :1104008-1104242 | MVR | MR150 | OK     | 28.9618 | 30.7429 | 0.0861034  | -0.109913 | 0.91248 | 0.999883 |
| gene1079 | gene1079 | cydA      | gi 57650036 ref NC_002951.2 :1104439-1106817 | MVR | MR150 | OK     | 3.54607 | 2.89965 | -0.290341  | 0.308313  | 0.75784 | 0.999883 |
| gene108  | gene108  | SACOL0112 | gi 57650036 ref NC_002951.2 :127288-127411   | MVR | MR150 | NOTEST | 0       | 0       | 0          | 0         | 1       | 1        |
| gene1080 | gene1080 | cydB      | gi 57650036 ref NC_002951.2 :1104439-1106817 | MVR | MR150 | OK     | 4.55485 | 3.73496 | -0.286309  | 0.289088  | 0.77251 | 0.999883 |
| gene1081 | gene1081 | SACOL1096 | gi 57650036 ref NC_002951.2 :1106949-1107612 | MVR | MR150 | OK     | 29.6967 | 21.8212 | -0.444571  | 0.651566  | 0.51468 | 0.999883 |
| gene1082 | gene1082 | SACOL1097 | gi 57650036 ref NC_002951.2 :1107647-1107827 | MVR | MR150 | OK     | 112.304 | 90.3482 | -0.313846  | 0.41056   | 0.6814  | 0.999883 |
| gene1083 | gene1083 | SACOL1098 | gi 57650036 ref NC_002951.2 :1107960-1109876 | MVR | MR150 | OK     | 166.852 | 200.301 | 0.263597   | -0.282198 | 0.77779 | 0.999883 |
| gene1084 | gene1084 | SACOL1099 | gi 57650036 ref NC_002951.2 :1107960-1109876 | MVR | MR150 | OK     | 86.8525 | 97.9759 | 0.173859   | -0.021956 | 0.98248 | 0.999883 |
| gene1085 | gene1085 | def       | gi 57650036 ref NC_002951.2 :1110356-1110908 | MVR | MR150 | OK     | 37.2244 | 38.6923 | 0.0557971  | -0.081579 | 0.93498 | 0.999883 |

|          |          |           |                                              |     |       |        |         |         |                        |           |         |          |
|----------|----------|-----------|----------------------------------------------|-----|-------|--------|---------|---------|------------------------|-----------|---------|----------|
| gene1086 | gene1086 | SACOL1101 | gi 57650036 ref NC_002951.2 :1111272-1111899 | MVR | MR150 | OK     | 146.356 | 115.429 | -0.342479              | 0.446236  | 0.65543 | 0.999883 |
| gene1087 | gene1087 | pdhA      | gi 57650036 ref NC_002951.2 :1112069-1113182 | MVR | MR150 | OK     | 218.989 | 259.819 | 0.246647               | -0.274843 | 0.78344 | 0.999883 |
| gene1088 | gene1088 | pdhB      | gi 57650036 ref NC_002951.2 :1113185-1114163 | MVR | MR150 | OK     | 224.137 | 242.488 | 0.113534               | -0.128934 | 0.89741 | 0.999883 |
| gene1089 | gene1089 | pdhC      | gi 57650036 ref NC_002951.2 :1114253-1115546 | MVR | MR150 | OK     | 259.045 | 294.953 | 0.187278               | -0.202061 | 0.83987 | 0.999883 |
| gene109  | gene109  | SACOL0113 | gi 57650036 ref NC_002951.2 :127489-129116   | MVR | MR150 | NOTEST | 0.85996 | 0.59506 | -0.531226              | 0.484641  | 0.62793 | 1        |
| gene1090 | gene1090 | pdhD      | gi 57650036 ref NC_002951.2 :1115549-1116956 | MVR | MR150 | OK     | 518.949 | 527.735 | 0.0242211              | -0.02486  | 0.98017 | 0.999883 |
| gene1091 | gene1091 | SACOL1106 | gi 57650036 ref NC_002951.2 :1117123-1117399 | MVR | MR150 | OK     | 61.3157 | 59.1421 | -0.0520722             | 0.075422  | 0.93988 | 0.999883 |
| gene1092 | gene1092 | SACOL1107 | gi 57650036 ref NC_002951.2 :1117542-1118082 | MVR | MR150 | OK     | 6.83875 | 9.00114 | 0.396376               | -0.544333 | 0.58621 | 0.999883 |
| gene1093 | gene1093 | SACOL1108 | gi 57650036 ref NC_002951.2 :1118094-1119979 | MVR | MR150 | OK     | 7.7884  | 5.81759 | -0.420906              | 0.520841  | 0.60248 | 0.999883 |
| gene1094 | gene1094 | SACOL1109 | gi 57650036 ref NC_002951.2 :1118094-1119979 | MVR | MR150 | OK     | 4.78766 | 3.58445 | -0.417569              | 0.330147  | 0.74129 | 0.999883 |
| gene1095 | gene1095 | SACOL1110 | gi 57650036 ref NC_002951.2 :1119984-1121867 | MVR | MR150 | OK     | 7.18417 | 8.28296 | 0.205324               | -0.154171 | 0.87748 | 0.999883 |
| gene1096 | gene1096 | SACOL1111 | gi 57650036 ref NC_002951.2 :1119984-1121867 | MVR | MR150 | OK     | 14.9983 | 13.842  | -0.11575               | 0.142843  | 0.88641 | 0.999883 |
| gene1097 | gene1097 | SACOL1112 | gi 57650036 ref NC_002951.2 :1121940-1122960 | MVR | MR150 | OK     | 306.35  | 271.345 | -0.175054              | 0.193504  | 0.84656 | 0.999883 |
| gene1098 | gene1098 | SACOL1113 | gi 57650036 ref NC_002951.2 :1123242-1123662 | MVR | MR150 | OK     | 165.152 | 177.451 | 0.103631               | -0.140817 | 0.88802 | 0.999883 |
| gene1099 | gene1099 | SACOL1114 | gi 57650036 ref NC_002951.2 :1123743-1125096 | MVR | MR150 | OK     | 504.654 | 386.67  | -0.38419               | 0.398073  | 0.69058 | 0.999883 |
| gene11   | gene11   | SACOL0012 | gi 57650036 ref NC_002951.2 :16111-17101     | MVR | MR150 | OK     | 3.58805 | 2.51987 | -0.509849              | 0.692601  | 0.48856 | 0.999883 |
| gene110  | gene110  | SACOL0114 | gi 57650036 ref NC_002951.2 :127489-129116   | MVR | MR150 | NOTEST | 0.99726 | 0       | -1.79769e+3(-1.79769e+ | 0.05993   | 1       |          |
| gene1100 | gene1100 | SACOL1115 | gi 57650036 ref NC_002951.2 :1125279-1125894 | MVR | MR150 | OK     | 179.992 | 197.324 | 0.132635               | -0.1663   | 0.86792 | 0.999883 |
| gene1101 | gene1101 | SACOL1116 | gi 57650036 ref NC_002951.2 :1126050-1126878 | MVR | MR150 | OK     | 134.563 | 146.773 | 0.125304               | -0.154666 | 0.87709 | 0.999883 |
| gene1102 | gene1102 | SACOL1117 | gi 57650036 ref NC_002951.2 :1127031-1127223 | MVR | MR150 | OK     | 383.619 | 372.293 | -0.0432355             | 0.063571  | 0.94931 | 0.999883 |
| gene1103 | gene1103 | typA      | gi 57650036 ref NC_002951.2 :1127324-1129172 | MVR | MR150 | OK     | 92.487  | 93.3141 | 0.0128446              | -0.014841 | 0.98816 | 0.999883 |
| gene1104 | gene1104 | SACOL1119 | gi 57650036 ref NC_002951.2 :1129311-1129479 | MVR | MR150 | OK     | 57.137  | 96.0281 | 0.749031               | -0.854983 | 0.39256 | 0.999883 |
| gene1105 | gene1105 | SACOL1120 | gi 57650036 ref NC_002951.2 :1129480-1129963 | MVR | MR150 | OK     | 65.2647 | 91.864  | 0.493198               | -0.702789 | 0.48219 | 0.999883 |
| gene1106 | gene1106 | SACOL1121 | gi 57650036 ref NC_002951.2 :1130103-1130379 | MVR | MR150 | OK     | 839.016 | 1125.44 | 0.423717               | -0.52811  | 0.59742 | 0.999883 |
| gene1107 | gene1107 | SACOL1122 | gi 57650036 ref NC_002951.2 :1130692-1131919 | MVR | MR150 | OK     | 91.7762 | 93.7974 | 0.0314278              | -0.038401 | 0.96937 | 0.999883 |
| gene1108 | gene1108 | pyc       | gi 57650036 ref NC_002951.2 :1132472-1135925 | MVR | MR150 | OK     | 71.1198 | 81.3258 | 0.193462               | -0.21267  | 0.83159 | 0.999883 |
| gene1109 | gene1109 | ctaA      | gi 57650036 ref NC_002951.2 :1136064-1137135 | MVR | MR150 | OK     | 63.865  | 59.7782 | -0.0954058             | 0.124561  | 0.90087 | 0.999883 |
| gene111  | gene111  | SACOL0115 | gi 57650036 ref NC_002951.2 :129325-133131   | MVR | MR150 | OK     | 1.4884  | 0.79185 | -0.910454              | 0.542125  | 0.58773 | 0.999883 |
| gene1110 | gene1110 | ctaB      | gi 57650036 ref NC_002951.2 :1137415-1138327 | MVR | MR150 | OK     | 172.366 | 164.306 | -0.0690899             | 0.082175  | 0.93451 | 0.999883 |
| gene1111 | gene1111 | SACOL1126 | gi 57650036 ref NC_002951.2 :1138351-1138813 | MVR | MR150 | OK     | 202.463 | 204.772 | 0.0163592              | -0.021442 | 0.98289 | 0.999883 |
| gene1112 | gene1112 | SACOL1127 | gi 57650036 ref NC_002951.2 :1139024-1139228 | MVR | MR150 | OK     | 6.21505 | 13.7972 | 1.15054                | -0.879145 | 0.37932 | 0.999883 |
| gene1113 | gene1113 | SACOL1128 | gi 57650036 ref NC_002951.2 :1139277-1140177 | MVR | MR150 | OK     | 40.6556 | 47.9051 | 0.236727               | -0.327232 | 0.74349 | 0.999883 |
| gene1114 | gene1114 | SACOL1129 | gi 57650036 ref NC_002951.2 :1140192-1140627 | MVR | MR150 | OK     | 64.04   | 99.3989 | 0.634256               | -0.912032 | 0.36175 | 0.999883 |

|          |          |           |                                              |     |       |        |         |         |            |           |         |          |
|----------|----------|-----------|----------------------------------------------|-----|-------|--------|---------|---------|------------|-----------|---------|----------|
| gene1115 | gene1115 | SACOL1130 | gi 57650036 ref NC_002951.2 :1140689-1141616 | MVR | MR150 | OK     | 41.0079 | 36.6488 | -0.162136  | 0.226237  | 0.82102 | 0.999883 |
| gene1116 | gene1116 | SACOL1131 | gi 57650036 ref NC_002951.2 :1141854-1142109 | MVR | MR150 | OK     | 20.3084 | 40.9563 | 1.01201    | -1.3214   | 0.18637 | 0.840333 |
| gene1117 | gene1117 | SACOL1132 | gi 57650036 ref NC_002951.2 :1142111-1142501 | MVR | MR150 | OK     | 16.8603 | 23.9751 | 0.507908   | -0.719597 | 0.47177 | 0.999883 |
| gene1118 | gene1118 | SACOL1133 | gi 57650036 ref NC_002951.2 :1142570-1143113 | MVR | MR150 | OK     | 15.93   | 21.8603 | 0.456568   | -0.666603 | 0.50503 | 0.999883 |
| gene1119 | gene1119 | coaD      | gi 57650036 ref NC_002951.2 :1143114-1143597 | MVR | MR150 | OK     | 56.9378 | 61.6029 | 0.113612   | -0.164765 | 0.86913 | 0.999883 |
| gene112  | gene112  | SACOL0116 | gi 57650036 ref NC_002951.2 :129325-133131   | MVR | MR150 | OK     | 1.09475 | 0.737   | -0.570868  | 0.322527  | 0.74705 | 0.999883 |
| gene1120 | gene1120 | SACOL1135 | gi 57650036 ref NC_002951.2 :1143658-1144798 | MVR | MR150 | OK     | 13.8541 | 14.1738 | 0.0329135  | -0.048115 | 0.96162 | 0.999883 |
| gene1121 | gene1121 | SACOL1136 | gi 57650036 ref NC_002951.2 :1144924-1145482 | MVR | MR150 | OK     | 189.442 | 247.933 | 0.388197   | -0.487164 | 0.62614 | 0.999883 |
| gene1122 | gene1122 | rpmF      | gi 57650036 ref NC_002951.2 :1145561-1145735 | MVR | MR150 | OK     | 2414.65 | 2356.8  | -0.0349808 | 0.047689  | 0.96197 | 0.999883 |
| gene1123 | gene1123 | isdB      | gi 57650036 ref NC_002951.2 :1145888-1147826 | MVR | MR150 | OK     | 2.72995 | 1.85074 | -0.560772  | 0.799347  | 0.42409 | 0.999883 |
| gene1124 | gene1124 | isdA      | gi 57650036 ref NC_002951.2 :1148028-1149081 | MVR | MR150 | OK     | 4.51468 | 8.43775 | 0.902236   | -1.30428  | 0.19214 | 0.852075 |
| gene1125 | gene1125 | isdC      | gi 57650036 ref NC_002951.2 :1149289-1151924 | MVR | MR150 | OK     | 1.77932 | 2.53032 | 0.507994   | -0.361667 | 0.7176  | 0.999883 |
| gene1126 | gene1126 | isdD      | gi 57650036 ref NC_002951.2 :1149289-1151924 | MVR | MR150 | OK     | 2.53664 | 0.17462 | -3.86066   | 1.59397   | 0.11094 | 0.661451 |
| gene1127 | gene1127 | SACOL1143 | gi 57650036 ref NC_002951.2 :1149289-1151924 | MVR | MR150 | OK     | 2.49965 | 2.02956 | -0.300563  | 0.273513  | 0.78446 | 0.999883 |
| gene1128 | gene1128 | SACOL1144 | gi 57650036 ref NC_002951.2 :1151936-1152902 | MVR | MR150 | OK     | 1.41858 | 2.39888 | 0.757916   | -0.949186 | 0.34253 | 0.999883 |
| gene1129 | gene1129 | srtB      | gi 57650036 ref NC_002951.2 :1152963-1153698 | MVR | MR150 | OK     | 1.37301 | 1.4308  | 0.0594878  | -0.065604 | 0.94769 | 0.999883 |
| gene113  | gene113  | SACOL0117 | gi 57650036 ref NC_002951.2 :129325-133131   | MVR | MR150 | OK     | 3.77949 | 2.986   | -0.339978  | 0.407196  | 0.68386 | 0.999883 |
| gene1130 | gene1130 | SACOL1146 | gi 57650036 ref NC_002951.2 :1153716-1154040 | MVR | MR150 | OK     | 6.2582  | 5.90877 | -0.0828917 | 0.091414  | 0.92716 | 0.999883 |
| gene1131 | gene1131 | SACOL1147 | gi 57650036 ref NC_002951.2 :1154423-1155164 | MVR | MR150 | OK     | 27.1416 | 28.5819 | 0.0745967  | -0.108581 | 0.91353 | 0.999883 |
| gene1132 | gene1132 | pheS      | gi 57650036 ref NC_002951.2 :1155544-1159005 | MVR | MR150 | OK     | 18.9095 | 19.6101 | 0.0524838  | -0.034226 | 0.9727  | 0.999883 |
| gene1133 | gene1133 | pheT      | gi 57650036 ref NC_002951.2 :1155544-1159005 | MVR | MR150 | OK     | 22.5751 | 19.9555 | -0.177942  | 0.196174  | 0.84447 | 0.999883 |
| gene1134 | gene1134 | rnhC      | gi 57650036 ref NC_002951.2 :1159175-1160114 | MVR | MR150 | OK     | 6.78813 | 6.2162  | -0.126982  | 0.183583  | 0.85434 | 0.999883 |
| gene1135 | gene1135 | SACOL1151 | gi 57650036 ref NC_002951.2 :1160483-1160750 | MVR | MR150 | OK     | 73.0164 | 91.1252 | 0.31963    | -0.466465 | 0.64088 | 0.999883 |
| gene1136 | gene1136 | SACOL1152 | gi 57650036 ref NC_002951.2 :1160750-1161272 | MVR | MR150 | OK     | 71.1161 | 124.015 | 0.802266   | -1.11021  | 0.26691 | 0.950133 |
| gene1137 | gene1137 | SACOL1153 | gi 57650036 ref NC_002951.2 :1161344-1163057 | MVR | MR150 | OK     | 30.2455 | 31.8885 | 0.0763129  | -0.100928 | 0.91961 | 0.999883 |
| gene1138 | gene1138 | SACOL1154 | gi 57650036 ref NC_002951.2 :1163066-1165415 | MVR | MR150 | OK     | 38.5352 | 36.9222 | -0.0616906 | 0.076813  | 0.93877 | 0.999883 |
| gene1139 | gene1139 | trxA      | gi 57650036 ref NC_002951.2 :1165587-1165902 | MVR | MR150 | OK     | 826.576 | 1223.6  | 0.565913   | -0.675894 | 0.49911 | 0.999883 |
| gene114  | gene114  | sodA1     | gi 57650036 ref NC_002951.2 :133398-133998   | MVR | MR150 | OK     | 160.266 | 248.338 | 0.631838   | -0.78932  | 0.42993 | 0.999883 |
| gene1140 | gene1140 | SACOL1156 | gi 57650036 ref NC_002951.2 :1165964-1166060 | MVR | MR150 | NOTEST | 0       | 0       | 0          | 0         | 1       | 1        |
| gene1141 | gene1141 | uvrC      | gi 57650036 ref NC_002951.2 :1166225-1168007 | MVR | MR150 | OK     | 15.9548 | 13.8451 | -0.20461   | 0.289994  | 0.77182 | 0.999883 |
| gene1142 | gene1142 | sdhC      | gi 57650036 ref NC_002951.2 :1168330-1168945 | MVR | MR150 | OK     | 286.283 | 404.975 | 0.500393   | -0.584853 | 0.55865 | 0.999883 |
| gene1143 | gene1143 | sdhA      | gi 57650036 ref NC_002951.2 :1168996-1171578 | MVR | MR150 | OK     | 619.83  | 711.391 | 0.198771   | -0.142538 | 0.88666 | 0.999883 |
| gene1144 | gene1144 | sdhB      | gi 57650036 ref NC_002951.2 :1168996-1171578 | MVR | MR150 | OK     | 1927.68 | 2041.88 | 0.0830338  | -0.064157 | 0.94885 | 0.999883 |



|          |          |             |                                              |     |       |        |         |         |                        |           |          |          |
|----------|----------|-------------|----------------------------------------------|-----|-------|--------|---------|---------|------------------------|-----------|----------|----------|
| gene1145 | gene1145 | murI        | gi 57650036 ref NC_002951.2 :1171813-1172614 | MVR | MR150 | OK     | 92.1142 | 122.282 | 0.408722               | -0.523777 | 0.60043  | 0.999883 |
| gene1146 | gene1146 | SACOL1162   | gi 57650036 ref NC_002951.2 :1172625-1173709 | MVR | MR150 | OK     | 121.221 | 155.026 | 0.354862               | -0.267176 | 0.78933  | 0.999883 |
| gene1147 | gene1147 | SACOL1163   | gi 57650036 ref NC_002951.2 :1172625-1173709 | MVR | MR150 | OK     | 247.143 | 265.689 | 0.104395               | -0.094669 | 0.92458  | 0.999883 |
| gene1148 | gene1148 | SACOL1164   | gi 57650036 ref NC_002951.2 :1174197-1174527 | MVR | MR150 | OK     | 849.472 | 677.105 | -0.327188              | 0.399172  | 0.68977  | 0.999883 |
| gene1149 | gene1149 | SACOL1165   | gi 57650036 ref NC_002951.2 :1174697-1174805 | MVR | MR150 | NOTEST | 0       | 0       | 0                      | 0         | 1        | 1        |
| gene115  | gene115  | SACOL0119   | gi 57650036 ref NC_002951.2 :134365-135091   | MVR | MR150 | OK     | 11.4138 | 22.4111 | 0.973436               | -1.42328  | 0.15465  | 0.769852 |
| gene1150 | gene1150 | SACOL1166   | gi 57650036 ref NC_002951.2 :1174895-1175297 | MVR | MR150 | OK     | 27.1127 | 18.8325 | -0.525742              | 0.755805  | 0.44977  | 0.999883 |
| gene1151 | gene1151 | SACOL1167   | gi 57650036 ref NC_002951.2 :1175968-1176475 | MVR | MR150 | OK     | 18.5578 | 15.9455 | -0.21887               | 0.317597  | 0.75079  | 0.999883 |
| gene1152 | gene1152 | efb         | gi 57650036 ref NC_002951.2 :1176733-1177231 | MVR | MR150 | OK     | 246.745 | 180.68  | -0.449588              | 0.578573  | 0.56288  | 0.999883 |
| gene1153 | gene1153 | SACOL1169   | gi 57650036 ref NC_002951.2 :1177384-1177735 | MVR | MR150 | OK     | 355.287 | 336.183 | -0.0797398             | 0.10476   | 0.91657  | 0.999883 |
| gene1154 | gene1154 | SACOL1170   | gi 57650036 ref NC_002951.2 :1178160-1178406 | MVR | MR150 | OK     | 17.2158 | 0       | -1.79769e+3(-1.79769e+ | 0.00868   | 0.152769 |          |
| gene1155 | gene1155 | SACOL1171   | gi 57650036 ref NC_002951.2 :1178556-1178742 | MVR | MR150 | OK     | 52.6856 | 41.8899 | -0.330809              | 0.387508  | 0.69838  | 0.999883 |
| gene1156 | gene1156 | SACOL1172   | gi 57650036 ref NC_002951.2 :1179363-1179597 | MVR | MR150 | OK     | 56.6644 | 86.6392 | 0.612577               | -0.864636 | 0.38724  | 0.999883 |
| gene1157 | gene1157 | hiY         | gi 57650036 ref NC_002951.2 :1180073-1181033 | MVR | MR150 | OK     | 2.30411 | 2.41781 | 0.0694905              | -0.09104  | 0.92746  | 0.999883 |
| gene1158 | gene1158 | SACOL1174   | gi 57650036 ref NC_002951.2 :1181705-1182033 | MVR | MR150 | NOTEST | 0       | 0       | 0                      | 0         | 1        | 1        |
| gene1159 | gene1159 | SACOL1175   | gi 57650036 ref NC_002951.2 :1181705-1182033 | MVR | MR150 | OK     | 56.3055 | 67.9226 | 0.270616               | -0.348291 | 0.72762  | 0.999883 |
| gene116  | gene116  | SACOL0120   | gi 57650036 ref NC_002951.2 :135282-136038   | MVR | MR150 | OK     | 17.5845 | 19.8259 | 0.173084               | -0.254263 | 0.79929  | 0.999883 |
| gene1160 | gene1160 | SACOL1176   | gi 57650036 ref NC_002951.2 :1182064-1182421 | MVR | MR150 | OK     | 30.0837 | 48.489  | 0.688677               | -0.848564 | 0.39612  | 0.999883 |
| gene1161 | gene1161 | SACOL1177   | gi 57650036 ref NC_002951.2 :1182064-1182421 | MVR | MR150 | OK     | 373.655 | 168.007 | -1.15319               | 0.58895   | 0.5559   | 0.999883 |
| gene1162 | gene1162 | SACOL1178   | gi 57650036 ref NC_002951.2 :1182589-1183306 | MVR | MR150 | OK     | 2.37185 | 2.07281 | -0.194419              | 0.235346  | 0.81394  | 0.999883 |
| gene1163 | gene1163 | SACOL1179   | gi 57650036 ref NC_002951.2 :1183413-1184139 | MVR | MR150 | OK     | 1.39761 | 1.45527 | 0.0583244              | -0.064321 | 0.94871  | 0.999883 |
| gene1164 | gene1164 | SACOL1180   | gi 57650036 ref NC_002951.2 :1184233-1184959 | MVR | MR150 | OK     | 1.39761 | 0.58211 | -1.2636                | 1.20427   | 0.22849  | 0.898537 |
| gene1165 | gene1165 | arcB1       | gi 57650036 ref NC_002951.2 :1185396-1186398 | MVR | MR150 | OK     | 2.63075 | 1.14563 | -1.19934               | 1.48762   | 0.13685  | 0.732537 |
| gene1166 | gene1166 | arcC1       | gi 57650036 ref NC_002951.2 :1186420-1187353 | MVR | MR150 | OK     | 3.79392 | 3.13353 | -0.275902              | 0.377958  | 0.70546  | 0.999883 |
| gene1167 | gene1167 | SACOL1183   | gi 57650036 ref NC_002951.2 :1187524-1189081 | MVR | MR150 | OK     | 4.78247 | 2.14449 | -1.15712               | 1.65164   | 0.09861  | 0.633775 |
| gene1168 | gene1168 | SACOL1184   | gi 57650036 ref NC_002951.2 :1189920-1190868 | MVR | MR150 | OK     | 19.546  | 18.0149 | -0.11768               | 0.171704  | 0.86367  | 0.999883 |
| gene1169 | gene1169 | SACOL1185   | gi 57650036 ref NC_002951.2 :1191116-1191305 | MVR | MR150 | OK     | 8.63929 | 25.8623 | 1.58186                | -1.23583  | 0.21652  | 0.89416  |
| gene117  | gene117  | deoD1       | gi 57650036 ref NC_002951.2 :136273-136981   | MVR | MR150 | OK     | 6.03981 | 4.21902 | -0.517596              | 0.708831  | 0.47843  | 0.999883 |
| gene1170 | gene1170 | SACOL_tRNA- | gi 57650036 ref NC_002951.2 :1191779-1191853 | MVR | MR150 | NOTEST | 0       | 0       | 0                      | 0         | 1        | 1        |
| gene1171 | gene1171 | SACOL1186   | gi 57650036 ref NC_002951.2 :1192216-1192351 | MVR | MR150 | NOTEST | 0       | 0       | 0                      | 0         | 1        | 1        |
| gene1172 | gene1172 | SACOL1187   | gi 57650036 ref NC_002951.2 :1192407-1192542 | MVR | MR150 | NOTEST | 0       | 0       | 0                      | 0         | 1        | 1        |
| gene1173 | gene1173 | SACOL1188   | gi 57650036 ref NC_002951.2 :1192665-1193361 | MVR | MR150 | OK     | 36.0448 | 37.9632 | 0.0748095              | -0.107957 | 0.91403  | 0.999883 |
| gene1174 | gene1174 | SACOL1189   | gi 57650036 ref NC_002951.2 :1193469-1193910 | MVR | MR150 | OK     | 794.784 | 791.498 | -0.0059782             | 0.006775  | 0.9946   | 0.999883 |

|          |          |           |                                              |     |       |    |         |         |            |           |         |          |
|----------|----------|-----------|----------------------------------------------|-----|-------|----|---------|---------|------------|-----------|---------|----------|
| gene1175 | gene1175 | SACOL1190 | gi 57650036 ref NC_002951.2 :1194104-1195718 | MVR | MR150 | OK | 43.171  | 44.5191 | 0.0443638  | -0.057013 | 0.95454 | 0.999883 |
| gene1176 | gene1176 | mraZ      | gi 57650036 ref NC_002951.2 :1195861-1196293 | MVR | MR150 | OK | 270.857 | 247.385 | -0.130769  | 0.169383  | 0.8655  | 0.999883 |
| gene1177 | gene1177 | mraW      | gi 57650036 ref NC_002951.2 :1196308-1197244 | MVR | MR150 | OK | 119.252 | 107.77  | -0.146049  | 0.181447  | 0.85602 | 0.999883 |
| gene1178 | gene1178 | SACOL1193 | gi 57650036 ref NC_002951.2 :1197272-1199874 | MVR | MR150 | OK | 153.566 | 140.382 | -0.129495  | 0.061915  | 0.95063 | 0.999883 |
| gene1179 | gene1179 | pbp1      | gi 57650036 ref NC_002951.2 :1197272-1199874 | MVR | MR150 | OK | 68.1178 | 56.4529 | -0.270983  | 0.284858  | 0.77575 | 0.999883 |
| gene118  | gene118  | SACOL0122 | gi 57650036 ref NC_002951.2 :136987-138340   | MVR | MR150 | OK | 6.37163 | 6.77437 | 0.0884238  | -0.129877 | 0.89666 | 0.999883 |
| gene1180 | gene1180 | mraY      | gi 57650036 ref NC_002951.2 :1200165-1201131 | MVR | MR150 | OK | 38.3804 | 35.9832 | -0.0930461 | 0.129701  | 0.8968  | 0.999883 |
| gene1181 | gene1181 | murD      | gi 57650036 ref NC_002951.2 :1201132-1202482 | MVR | MR150 | OK | 54.5888 | 49.6751 | -0.136082  | 0.175586  | 0.86062 | 0.999883 |
| gene1182 | gene1182 | divIB     | gi 57650036 ref NC_002951.2 :1202497-1203817 | MVR | MR150 | OK | 65.4209 | 56.8852 | -0.201698  | 0.256394  | 0.79765 | 0.999883 |
| gene1183 | gene1183 | ftsA      | gi 57650036 ref NC_002951.2 :1203922-1205335 | MVR | MR150 | OK | 243.188 | 247.853 | 0.0274163  | -0.029619 | 0.97637 | 0.999883 |
| gene1184 | gene1184 | ftsZ      | gi 57650036 ref NC_002951.2 :1205367-1206540 | MVR | MR150 | OK | 517.276 | 499.255 | -0.0511584 | 0.053065  | 0.95768 | 0.999883 |
| gene1185 | gene1185 | SACOL1200 | gi 57650036 ref NC_002951.2 :1206799-1207591 | MVR | MR150 | OK | 15.8529 | 21.7245 | 0.454583   | -0.666623 | 0.50501 | 0.999883 |
| gene1186 | gene1186 | SACOL1201 | gi 57650036 ref NC_002951.2 :1207608-1208843 | MVR | MR150 | OK | 262.628 | 258.79  | -0.0212399 | 0.019437  | 0.98449 | 0.999883 |
| gene1187 | gene1187 | ylmF      | gi 57650036 ref NC_002951.2 :1207608-1208843 | MVR | MR150 | OK | 170.303 | 192.14  | 0.174047   | -0.115684 | 0.9079  | 0.999883 |
| gene1188 | gene1188 | ylmG      | gi 57650036 ref NC_002951.2 :1208854-1209145 | MVR | MR150 | OK | 272.075 | 353.206 | 0.376504   | -0.522427 | 0.60137 | 0.999883 |
| gene1189 | gene1189 | ylmH      | gi 57650036 ref NC_002951.2 :1209254-1210034 | MVR | MR150 | OK | 88.3355 | 97.934  | 0.148816   | -0.194342 | 0.84591 | 0.999883 |
| gene119  | gene119  | deoC1     | gi 57650036 ref NC_002951.2 :138420-139083   | MVR | MR150 | OK | 31.2947 | 31.4093 | 0.0052733  | -0.007688 | 0.99387 | 0.999883 |
| gene1190 | gene1190 | SACOL1205 | gi 57650036 ref NC_002951.2 :1210057-1210675 | MVR | MR150 | OK | 292.266 | 283.061 | -0.0461692 | 0.054969  | 0.95616 | 0.999883 |
| gene1191 | gene1191 | ileS      | gi 57650036 ref NC_002951.2 :1210895-1213649 | MVR | MR150 | OK | 69.4739 | 77.4304 | 0.156428   | -0.176856 | 0.85962 | 0.999883 |
| gene1192 | gene1192 | SACOL1207 | gi 57650036 ref NC_002951.2 :1213938-1214736 | MVR | MR150 | OK | 26.0775 | 25.3472 | -0.040978  | 0.059601  | 0.95247 | 0.999883 |
| gene1193 | gene1193 | lspA      | gi 57650036 ref NC_002951.2 :1215559-1216968 | MVR | MR150 | OK | 29.3761 | 28.2852 | -0.0545991 | 0.033924  | 0.97294 | 0.999883 |
| gene1194 | gene1194 | SACOL1209 | gi 57650036 ref NC_002951.2 :1215559-1216968 | MVR | MR150 | OK | 42.2978 | 42.866  | 0.0192532  | -0.023075 | 0.98159 | 0.999883 |
| gene1195 | gene1195 | pyrR      | gi 57650036 ref NC_002951.2 :1217367-1217895 | MVR | MR150 | OK | 92.1964 | 112.423 | 0.286151   | -0.393111 | 0.69424 | 0.999883 |
| gene1196 | gene1196 | uraA      | gi 57650036 ref NC_002951.2 :1218112-1219420 | MVR | MR150 | OK | 70.461  | 72.0145 | 0.0314626  | -0.039325 | 0.96863 | 0.999883 |
| gene1197 | gene1197 | pyrB      | gi 57650036 ref NC_002951.2 :1219447-1220329 | MVR | MR150 | OK | 109.217 | 118.993 | 0.12368    | -0.154976 | 0.87684 | 0.999883 |
| gene1198 | gene1198 | pyrC      | gi 57650036 ref NC_002951.2 :1220346-1221621 | MVR | MR150 | OK | 137.5   | 130.498 | -0.0753978 | 0.087745  | 0.93008 | 0.999883 |
| gene1199 | gene1199 | carA      | gi 57650036 ref NC_002951.2 :1221622-1225889 | MVR | MR150 | OK | 102.824 | 102.49  | -0.0046947 | 0.002288  | 0.99818 | 0.999883 |
| gene12   | gene12   | SACOL0013 | gi 57650036 ref NC_002951.2 :17406-18330     | MVR | MR150 | OK | 70.672  | 78.8885 | 0.158678   | -0.207089 | 0.83594 | 0.999883 |
| gene120  | gene120  | deoB      | gi 57650036 ref NC_002951.2 :139110-140289   | MVR | MR150 | OK | 54.0726 | 64.4492 | 0.253263   | -0.327996 | 0.74292 | 0.999883 |
| gene1200 | gene1200 | carB      | gi 57650036 ref NC_002951.2 :1221622-1225889 | MVR | MR150 | OK | 115.479 | 107.343 | -0.105412  | 0.097661  | 0.9222  | 0.999883 |
| gene1201 | gene1201 | pyrF      | gi 57650036 ref NC_002951.2 :1225998-1227302 | MVR | MR150 | OK | 94.7395 | 92.8457 | -0.0291307 | 0.029101  | 0.97678 | 0.999883 |
| gene1202 | gene1202 | pyrE      | gi 57650036 ref NC_002951.2 :1225998-1227302 | MVR | MR150 | OK | 62.8205 | 71.3305 | 0.183283   | -0.141069 | 0.88782 | 0.999883 |
| gene1203 | gene1203 | SACOL1218 | gi 57650036 ref NC_002951.2 :1227331-1227544 | MVR | MR150 | OK | 390.113 | 372.137 | -0.0680611 | 0.099287  | 0.92091 | 0.999883 |

|          |          |           |                                              |     |       |        |         |         |            |           |         |          |
|----------|----------|-----------|----------------------------------------------|-----|-------|--------|---------|---------|------------|-----------|---------|----------|
| gene1204 | gene1204 | SACOL1219 | gi 57650036 ref NC_002951.2 :1227980-1228382 | MVR | MR150 | OK     | 120.393 | 143.127 | 0.249543   | -0.351022 | 0.72557 | 0.999883 |
| gene1205 | gene1205 | SACOL1220 | gi 57650036 ref NC_002951.2 :1228644-1230342 | MVR | MR150 | OK     | 37.7352 | 38.4447 | 0.0268731  | -0.034849 | 0.9722  | 0.999883 |
| gene1206 | gene1206 | gmk       | gi 57650036 ref NC_002951.2 :1230616-1231458 | MVR | MR150 | OK     | 201.376 | 222.381 | 0.14314    | -0.159786 | 0.87305 | 0.999883 |
| gene1207 | gene1207 | rpoZ      | gi 57650036 ref NC_002951.2 :1230616-1231458 | MVR | MR150 | OK     | 279.507 | 468.885 | 0.746348   | -0.337717 | 0.73558 | 0.999883 |
| gene1208 | gene1208 | coaBC     | gi 57650036 ref NC_002951.2 :1231667-1235281 | MVR | MR150 | OK     | 27.0971 | 34.2525 | 0.338066   | -0.186111 | 0.85236 | 0.999883 |
| gene1209 | gene1209 | priA      | gi 57650036 ref NC_002951.2 :1231667-1235281 | MVR | MR150 | OK     | 46.9    | 49.6493 | 0.0821852  | -0.084707 | 0.9325  | 0.999883 |
| gene121  | gene121  | SACOL0125 | gi 57650036 ref NC_002951.2 :140419-142032   | MVR | MR150 | OK     | 3.65446 | 1.73989 | -1.07067   | 1.08383   | 0.27844 | 0.964151 |
| gene1210 | gene1210 | SACOL1225 | gi 57650036 ref NC_002951.2 :1235786-1236740 | MVR | MR150 | OK     | 22.4294 | 26.1982 | 0.224078   | -0.323181 | 0.74656 | 0.999883 |
| gene1211 | gene1211 | SACOL1226 | gi 57650036 ref NC_002951.2 :1236902-1237181 | MVR | MR150 | OK     | 1505.54 | 1740.8  | 0.209474   | -0.245139 | 0.80635 | 0.999883 |
| gene1212 | gene1212 | def2      | gi 57650036 ref NC_002951.2 :1237404-1240125 | MVR | MR150 | OK     | 45.5463 | 58.2134 | 0.354017   | -0.147903 | 0.88242 | 0.999883 |
| gene1213 | gene1213 | fmt       | gi 57650036 ref NC_002951.2 :1237404-1240125 | MVR | MR150 | OK     | 54.6981 | 54.0932 | -0.0160417 | 0.011125  | 0.99112 | 0.999883 |
| gene1214 | gene1214 | sun       | gi 57650036 ref NC_002951.2 :1237404-1240125 | MVR | MR150 | OK     | 52.0635 | 61.6478 | 0.243777   | -0.212637 | 0.83161 | 0.999883 |
| gene1215 | gene1215 | SACOL1230 | gi 57650036 ref NC_002951.2 :1240127-1241222 | MVR | MR150 | OK     | 49.1475 | 54.5826 | 0.151325   | -0.200523 | 0.84107 | 0.999883 |
| gene1216 | gene1216 | SACOL1231 | gi 57650036 ref NC_002951.2 :1241228-1243963 | MVR | MR150 | OK     | 46.5493 | 50.3759 | 0.113975   | -0.051475 | 0.95895 | 0.999883 |
| gene1217 | gene1217 | SACOL1232 | gi 57650036 ref NC_002951.2 :1241228-1243963 | MVR | MR150 | OK     | 72.8559 | 84.3085 | 0.210633   | -0.221578 | 0.82464 | 0.999883 |
| gene1218 | gene1218 | SACOL1234 | gi 57650036 ref NC_002951.2 :1244190-1245066 | MVR | MR150 | OK     | 33.9005 | 44.1688 | 0.381719   | -0.535955 | 0.59199 | 0.999883 |
| gene1219 | gene1219 | rpe       | gi 57650036 ref NC_002951.2 :1245066-1245711 | MVR | MR150 | OK     | 48.8776 | 45.7502 | -0.0953937 | 0.136591  | 0.89135 | 0.999883 |
| gene122  | gene122  | SACOL0126 | gi 57650036 ref NC_002951.2 :140419-142032   | MVR | MR150 | OK     | 2.12805 | 2.03804 | -0.06235   | 0.056696  | 0.95479 | 0.999883 |
| gene1220 | gene1220 | SACOL1236 | gi 57650036 ref NC_002951.2 :1245717-1246359 | MVR | MR150 | OK     | 46.4309 | 54.3721 | 0.227782   | -0.324651 | 0.74545 | 0.999883 |
| gene1221 | gene1221 | rpmB      | gi 57650036 ref NC_002951.2 :1246739-1246928 | MVR | MR150 | OK     | 13523.4 | 19707   | 0.543257   | -0.577529 | 0.56358 | 0.999883 |
| gene1222 | gene1222 | SACOL1239 | gi 57650036 ref NC_002951.2 :1247370-1247745 | MVR | MR150 | OK     | 99.6049 | 102.856 | 0.0463354  | -0.067059 | 0.94654 | 0.999883 |
| gene1223 | gene1223 | SACOL1240 | gi 57650036 ref NC_002951.2 :1247759-1249406 | MVR | MR150 | OK     | 108.261 | 118.34  | 0.128419   | -0.147314 | 0.88289 | 0.999883 |
| gene1224 | gene1224 | recG      | gi 57650036 ref NC_002951.2 :1249595-1251656 | MVR | MR150 | OK     | 26.6818 | 35.7212 | 0.420923   | -0.544854 | 0.58585 | 0.999883 |
| gene1225 | gene1225 | SACOL1242 | gi 57650036 ref NC_002951.2 :1251858-1252431 | MVR | MR150 | OK     | 74.5089 | 79.5997 | 0.09535    | -0.132991 | 0.8942  | 0.999883 |
| gene1226 | gene1226 | plsX      | gi 57650036 ref NC_002951.2 :1252435-1255068 | MVR | MR150 | OK     | 64.0723 | 59.54   | -0.105844  | 0.06983   | 0.94433 | 0.999883 |
| gene1227 | gene1227 | fabD      | gi 57650036 ref NC_002951.2 :1252435-1255068 | MVR | MR150 | OK     | 58.6421 | 67.1894 | 0.196298   | -0.125437 | 0.90018 | 0.999883 |
| gene1228 | gene1228 | fabG1     | gi 57650036 ref NC_002951.2 :1252435-1255068 | MVR | MR150 | OK     | 103.662 | 105.307 | 0.0227169  | -0.016027 | 0.98721 | 0.999883 |
| gene1229 | gene1229 | SACOL1246 | gi 57650036 ref NC_002951.2 :1255190-1255289 | MVR | MR150 | NOTEST | 0       | 0       | 0          | 0         | 1       | 1        |
| gene123  | gene123  | SACOL0127 | gi 57650036 ref NC_002951.2 :142033-142807   | MVR | MR150 | OK     | 2.87031 | 1.60038 | -0.842792  | 1.02804   | 0.30393 | 0.988652 |
| gene1230 | gene1230 | acpP      | gi 57650036 ref NC_002951.2 :1255310-1255544 | MVR | MR150 | OK     | 920.482 | 1173.82 | 0.350752   | -0.457882 | 0.64704 | 0.999883 |
| gene1231 | gene1231 | rnc       | gi 57650036 ref NC_002951.2 :1255659-1256391 | MVR | MR150 | OK     | 18.5299 | 16.1153 | -0.201423  | 0.296183  | 0.76709 | 0.999883 |
| gene1232 | gene1232 | SACOL1250 | gi 57650036 ref NC_002951.2 :1256537-1261673 | MVR | MR150 | OK     | 18.3023 | 19.791  | 0.112823   | -0.113306 | 0.90979 | 0.999883 |
| gene1233 | gene1233 | SACOL1251 | gi 57650036 ref NC_002951.2 :1256537-1261673 | MVR | MR150 | OK     | 27.3907 | 27.3949 | 0.0002182  | -0.000146 | 0.99988 | 0.999883 |

|          |          |           |                                              |     |       |        |         |         |            |           |         |          |
|----------|----------|-----------|----------------------------------------------|-----|-------|--------|---------|---------|------------|-----------|---------|----------|
| gene1234 | gene1234 | SACOL1252 | gi 57650036 ref NC_002951.2 :1256537-1261673 | MVR | MR150 | OK     | 17.6157 | 15.563  | -0.178736  | 0.032736  | 0.97389 | 0.999883 |
| gene1235 | gene1235 | ffh       | gi 57650036 ref NC_002951.2 :1261698-1263066 | MVR | MR150 | OK     | 115.282 | 110.408 | -0.0623271 | 0.073258  | 0.9416  | 0.999883 |
| gene1236 | gene1236 | rpsP      | gi 57650036 ref NC_002951.2 :1263500-1263776 | MVR | MR150 | OK     | 289.503 | 280.055 | -0.0478692 | 0.067879  | 0.94588 | 0.999883 |
| gene1237 | gene1237 | rimM      | gi 57650036 ref NC_002951.2 :1263963-1265204 | MVR | MR150 | OK     | 8.96048 | 6.03839 | -0.569413  | 0.48445   | 0.62807 | 0.999883 |
| gene1238 | gene1238 | trmD      | gi 57650036 ref NC_002951.2 :1263963-1265204 | MVR | MR150 | OK     | 7.27998 | 8.25241 | 0.180882   | -0.212832 | 0.83146 | 0.999883 |
| gene1239 | gene1239 | rplS      | gi 57650036 ref NC_002951.2 :1265306-1265657 | MVR | MR150 | OK     | 891.905 | 802.277 | -0.15279   | 0.180969  | 0.85639 | 0.999883 |
| gene124  | gene124  | SACOL0128 | gi 57650036 ref NC_002951.2 :143020-143977   | MVR | MR150 | OK     | 4.94618 | 4.85477 | -0.0269119 | 0.038257  | 0.96948 | 0.999883 |
| gene1240 | gene1240 | SACOL1259 | gi 57650036 ref NC_002951.2 :1265900-1268507 | MVR | MR150 | OK     | 7.41273 | 6.23666 | -0.24923   | 0.361244  | 0.71792 | 0.999883 |
| gene1241 | gene1241 | rbgA      | gi 57650036 ref NC_002951.2 :1268907-1270543 | MVR | MR150 | OK     | 17.3388 | 16.3179 | -0.0875538 | 0.097877  | 0.92203 | 0.999883 |
| gene1242 | gene1242 | rnhB      | gi 57650036 ref NC_002951.2 :1268907-1270543 | MVR | MR150 | OK     | 13.0051 | 13.7469 | 0.0800278  | -0.072485 | 0.94222 | 0.999883 |
| gene1243 | gene1243 | sucC      | gi 57650036 ref NC_002951.2 :1270651-1271818 | MVR | MR150 | OK     | 451.232 | 474.795 | 0.0734349  | -0.076633 | 0.93892 | 0.999883 |
| gene1244 | gene1244 | sucD      | gi 57650036 ref NC_002951.2 :1271839-1272748 | MVR | MR150 | OK     | 866.883 | 840.122 | -0.0452387 | 0.046504  | 0.96291 | 0.999883 |
| gene1245 | gene1245 | lytN      | gi 57650036 ref NC_002951.2 :1272941-1274093 | MVR | MR150 | OK     | 3.33998 | 2.41297 | -0.469031  | 0.64694   | 0.51767 | 0.999883 |
| gene1246 | gene1246 | eprH      | gi 57650036 ref NC_002951.2 :1274120-1275365 | MVR | MR150 | OK     | 4.5824  | 5.27594 | 0.203325   | -0.294966 | 0.76802 | 0.999883 |
| gene1247 | gene1247 | SACOL1266 | gi 57650036 ref NC_002951.2 :1275537-1276410 | MVR | MR150 | OK     | 4.32472 | 2.50267 | -0.789137  | 1.05953   | 0.28936 | 0.975616 |
| gene1248 | gene1248 | topA      | gi 57650036 ref NC_002951.2 :1276589-1278659 | MVR | MR150 | OK     | 60.5177 | 55.6993 | -0.119697  | 0.14387   | 0.8856  | 0.999883 |
| gene1249 | gene1249 | gid       | gi 57650036 ref NC_002951.2 :1278814-1280122 | MVR | MR150 | OK     | 81.4672 | 74.2261 | -0.134292  | 0.166084  | 0.86809 | 0.999883 |
| gene125  | gene125  | SACOL0129 | gi 57650036 ref NC_002951.2 :144205-145750   | MVR | MR150 | OK     | 2.08089 | 1.13874 | -0.86976   | 1.15718   | 0.2472  | 0.92193  |
| gene1250 | gene1250 | xerC      | gi 57650036 ref NC_002951.2 :1280538-1281977 | MVR | MR150 | OK     | 83.8456 | 76.6704 | -0.129066  | 0.138049  | 0.8902  | 0.999883 |
| gene1251 | gene1251 | hslV      | gi 57650036 ref NC_002951.2 :1280538-1281977 | MVR | MR150 | OK     | 54.9665 | 67.6671 | 0.299903   | -0.194835 | 0.84552 | 0.999883 |
| gene1252 | gene1252 | hslU      | gi 57650036 ref NC_002951.2 :1282042-1283446 | MVR | MR150 | OK     | 94.9141 | 102.019 | 0.104146   | -0.123934 | 0.90137 | 0.999883 |
| gene1253 | gene1253 | codY      | gi 57650036 ref NC_002951.2 :1283470-1284244 | MVR | MR150 | OK     | 164.246 | 138.7   | -0.24389   | 0.301779  | 0.76282 | 0.999883 |
| gene1254 | gene1254 | rpsB      | gi 57650036 ref NC_002951.2 :1284585-1285350 | MVR | MR150 | OK     | 287.805 | 279.106 | -0.0442814 | 0.050991  | 0.95933 | 0.999883 |
| gene1255 | gene1255 | SACOL1275 | gi 57650036 ref NC_002951.2 :1285395-1285509 | MVR | MR150 | NOTEST | 0       | 0       | 0          | 0         | 1       | 1        |
| gene1256 | gene1256 | tsf       | gi 57650036 ref NC_002951.2 :1285543-1286425 | MVR | MR150 | OK     | 501.029 | 509.425 | 0.0239734  | -0.02556  | 0.97961 | 0.999883 |
| gene1257 | gene1257 | pyrH      | gi 57650036 ref NC_002951.2 :1286561-1287284 | MVR | MR150 | OK     | 52.4909 | 72.8877 | 0.473609   | -0.651569 | 0.51468 | 0.999883 |
| gene1258 | gene1258 | frr       | gi 57650036 ref NC_002951.2 :1287302-1287857 | MVR | MR150 | OK     | 75.0129 | 89.6641 | 0.257391   | -0.358432 | 0.72002 | 0.999883 |
| gene1259 | gene1259 | uppS      | gi 57650036 ref NC_002951.2 :1288229-1289000 | MVR | MR150 | OK     | 27.0433 | 34.857  | 0.366175   | -0.529089 | 0.59674 | 0.999883 |
| gene126  | gene126  | SACOL0130 | gi 57650036 ref NC_002951.2 :145800-147336   | MVR | MR150 | OK     | 8.69271 | 8.48345 | -0.0351534 | 0.051563  | 0.95888 | 0.999883 |
| gene1260 | gene1260 | cdsA      | gi 57650036 ref NC_002951.2 :1289006-1289789 | MVR | MR150 | OK     | 41.9435 | 62.5025 | 0.575467   | -0.797461 | 0.42518 | 0.999883 |
| gene1261 | gene1261 | SACOL1281 | gi 57650036 ref NC_002951.2 :1290025-1291312 | MVR | MR150 | OK     | 28.9941 | 28.7422 | -0.0125911 | 0.017371  | 0.98614 | 0.999883 |
| gene1262 | gene1262 | proS      | gi 57650036 ref NC_002951.2 :1291331-1293035 | MVR | MR150 | OK     | 41.9294 | 42.2631 | 0.0114384  | -0.014665 | 0.9883  | 0.999883 |
| gene1263 | gene1263 | polC      | gi 57650036 ref NC_002951.2 :1293298-1297609 | MVR | MR150 | OK     | 24.6459 | 26.5688 | 0.108388   | -0.130719 | 0.896   | 0.999883 |

|          |          |           |                                              |     |       |        |         |         |            |           |         |          |
|----------|----------|-----------|----------------------------------------------|-----|-------|--------|---------|---------|------------|-----------|---------|----------|
| gene1264 | gene1264 | SACOL1284 | gi 57650036 ref NC_002951.2 :1297898-1298366 | MVR | MR150 | OK     | 37.2266 | 54.7613 | 0.556825   | -0.814709 | 0.41524 | 0.999883 |
| gene1265 | gene1265 | nusA      | gi 57650036 ref NC_002951.2 :1298386-1299562 | MVR | MR150 | OK     | 78.2008 | 83.1626 | 0.0887517  | -0.110983 | 0.91163 | 0.999883 |
| gene1266 | gene1266 | SACOL1286 | gi 57650036 ref NC_002951.2 :1299582-1300181 | MVR | MR150 | OK     | 42.8213 | 49.6961 | 0.214805   | -0.166309 | 0.86791 | 0.999883 |
| gene1267 | gene1267 | SACOL1287 | gi 57650036 ref NC_002951.2 :1299582-1300181 | MVR | MR150 | OK     | 81.1993 | 98.6395 | 0.280698   | -0.345887 | 0.72943 | 0.999883 |
| gene1268 | gene1268 | infB      | gi 57650036 ref NC_002951.2 :1300185-1302303 | MVR | MR150 | OK     | 125.133 | 138.32  | 0.144545   | -0.15863  | 0.87396 | 0.999883 |
| gene1269 | gene1269 | rbfA      | gi 57650036 ref NC_002951.2 :1302688-1303039 | MVR | MR150 | OK     | 86.7612 | 104.127 | 0.263228   | -0.38383  | 0.7011  | 0.999883 |
| gene127  | gene127  | SACOL0132 | gi 57650036 ref NC_002951.2 :147862-148756   | MVR | MR150 | NOTEST | 0       | 0       | 0          | 0         | 1       | 1        |
| gene1270 | gene1270 | truB      | gi 57650036 ref NC_002951.2 :1303207-1304125 | MVR | MR150 | OK     | 9.85825 | 11.5163 | 0.224268   | -0.329312 | 0.74192 | 0.999883 |
| gene1271 | gene1271 | ribF      | gi 57650036 ref NC_002951.2 :1304139-1305111 | MVR | MR150 | OK     | 60.0406 | 60.4979 | 0.0109456  | -0.014501 | 0.98843 | 0.999883 |
| gene1272 | gene1272 | rpsO      | gi 57650036 ref NC_002951.2 :1305225-1305495 | MVR | MR150 | OK     | 2141.74 | 1739.44 | -0.300162  | 0.347744  | 0.72803 | 0.999883 |
| gene1273 | gene1273 | pnp       | gi 57650036 ref NC_002951.2 :1305864-1307961 | MVR | MR150 | OK     | 111.359 | 100.285 | -0.151104  | 0.169677  | 0.86526 | 0.999883 |
| gene1274 | gene1274 | SACOL1294 | gi 57650036 ref NC_002951.2 :1308298-1309870 | MVR | MR150 | OK     | 193.466 | 190.559 | -0.0218386 | 0.023872  | 0.98096 | 0.999883 |
| gene1275 | gene1275 | SACOL1295 | gi 57650036 ref NC_002951.2 :1310116-1312495 | MVR | MR150 | OK     | 28.5263 | 25.6585 | -0.152857  | 0.197457  | 0.84347 | 0.999883 |
| gene1276 | gene1276 | SACOL1296 | gi 57650036 ref NC_002951.2 :1312499-1313213 | MVR | MR150 | OK     | 12.4091 | 12.5094 | 0.0116205  | -0.017    | 0.98644 | 0.999883 |
| gene1277 | gene1277 | SACOL1297 | gi 57650036 ref NC_002951.2 :1313243-1316499 | MVR | MR150 | OK     | 11.5058 | 9.91307 | -0.214957  | 0.181506  | 0.85597 | 0.999883 |
| gene1278 | gene1278 | SACOL1298 | gi 57650036 ref NC_002951.2 :1313243-1316499 | MVR | MR150 | OK     | 11.8837 | 11.2715 | -0.0763167 | 0.067732  | 0.946   | 0.999883 |
| gene1279 | gene1279 | SACOL1299 | gi 57650036 ref NC_002951.2 :1313243-1316499 | MVR | MR150 | OK     | 14.3428 | 12.1259 | -0.242235  | 0.155465  | 0.87646 | 0.999883 |
| gene128  | gene128  | SACOL0134 | gi 57650036 ref NC_002951.2 :149516-150001   | MVR | MR150 | NOTEST | 0.44671 | 0.5366  | 0.264534   | -0.149122 | 0.88146 | 1        |
| gene1280 | gene1280 | SACOL1300 | gi 57650036 ref NC_002951.2 :1316603-1317431 | MVR | MR150 | OK     | 58.7624 | 63.1465 | 0.103809   | -0.140381 | 0.88836 | 0.999883 |
| gene1281 | gene1281 | SACOL1301 | gi 57650036 ref NC_002951.2 :1317449-1317842 | MVR | MR150 | OK     | 42.6545 | 48.0205 | 0.170951   | -0.251207 | 0.80165 | 0.999883 |
| gene1282 | gene1282 | pgsA      | gi 57650036 ref NC_002951.2 :1317875-1318454 | MVR | MR150 | OK     | 129.717 | 133.665 | 0.0432508  | -0.056997 | 0.95455 | 0.999883 |
| gene1283 | gene1283 | SACOL1303 | gi 57650036 ref NC_002951.2 :1318680-1319832 | MVR | MR150 | OK     | 45.8145 | 47.1334 | 0.0409446  | -0.054503 | 0.95653 | 0.999883 |
| gene1284 | gene1284 | recA      | gi 57650036 ref NC_002951.2 :1319996-1321040 | MVR | MR150 | OK     | 439.234 | 514.564 | 0.228361   | -0.240323 | 0.81008 | 0.999883 |
| gene1285 | gene1285 | SACOL1305 | gi 57650036 ref NC_002951.2 :1321393-1322953 | MVR | MR150 | OK     | 476.648 | 409.482 | -0.219124  | 0.225311  | 0.82174 | 0.999883 |
| gene1286 | gene1286 | SACOL1306 | gi 57650036 ref NC_002951.2 :1323249-1323465 | MVR | MR150 | OK     | 2621.91 | 3263.38 | 0.315749   | -0.377761 | 0.70561 | 0.999883 |
| gene1287 | gene1287 | SACOL1307 | gi 57650036 ref NC_002951.2 :1323638-1324436 | MVR | MR150 | OK     | 90.0488 | 95.5    | 0.0847946  | -0.110424 | 0.91207 | 0.999883 |
| gene1288 | gene1288 | SACOL1308 | gi 57650036 ref NC_002951.2 :1324575-1326336 | MVR | MR150 | OK     | 29.6817 | 40.8184 | 0.459647   | -0.598489 | 0.54951 | 0.999883 |
| gene1289 | gene1289 | SACOL1309 | gi 57650036 ref NC_002951.2 :1326336-1327203 | MVR | MR150 | OK     | 52.3807 | 66.1136 | 0.335912   | -0.452957 | 0.65058 | 0.999883 |
| gene129  | gene129  | SACOL0135 | gi 57650036 ref NC_002951.2 :150450-153060   | MVR | MR150 | OK     | 1.81408 | 0.9534  | -0.92808   | 1.29594   | 0.195   | 0.856906 |
| gene1290 | gene1290 | SACOL1310 | gi 57650036 ref NC_002951.2 :1327296-1327590 | MVR | MR150 | OK     | 5.27671 | 1.48471 | -1.82945   | 1.33411   | 0.18217 | 0.830192 |
| gene1291 | gene1291 | miaB      | gi 57650036 ref NC_002951.2 :1327723-1329268 | MVR | MR150 | OK     | 39.6698 | 38.1479 | -0.0564368 | 0.07386   | 0.94112 | 0.999883 |
| gene1292 | gene1292 | SACOL1313 | gi 57650036 ref NC_002951.2 :1329268-1329634 | MVR | MR150 | OK     | 52.5351 | 69.9458 | 0.412956   | -0.606061 | 0.54447 | 0.999883 |
| gene1293 | gene1293 | SACOL1314 | gi 57650036 ref NC_002951.2 :1329660-1330152 | MVR | MR150 | OK     | 56.1411 | 65.4749 | 0.221886   | -0.32088  | 0.7483  | 0.999883 |

|          |          |           |                                              |     |       |        |         |         |              |              |         |          |
|----------|----------|-----------|----------------------------------------------|-----|-------|--------|---------|---------|--------------|--------------|---------|----------|
| gene1294 | gene1294 | hexA      | gi 57650036 ref NC_002951.2 :1330454-1333073 | MVR | MR150 | OK     | 17.9505 | 15.1977 | -0.240173    | 0.322834     | 0.74682 | 0.999883 |
| gene1295 | gene1295 | mutL      | gi 57650036 ref NC_002951.2 :1333085-1335095 | MVR | MR150 | OK     | 17.2259 | 21.0717 | 0.290728     | -0.396901    | 0.69144 | 0.999883 |
| gene1296 | gene1296 | glpP      | gi 57650036 ref NC_002951.2 :1335100-1335643 | MVR | MR150 | OK     | 15.1976 | 16.5068 | 0.119216     | -0.173212    | 0.86248 | 0.999883 |
| gene1297 | gene1297 | glpF      | gi 57650036 ref NC_002951.2 :1336107-1336926 | MVR | MR150 | OK     | 170.108 | 151.626 | -0.16593     | 0.20189      | 0.84    | 0.999883 |
| gene1298 | gene1298 | glpK      | gi 57650036 ref NC_002951.2 :1337054-1338551 | MVR | MR150 | OK     | 37.6276 | 28.4591 | -0.402904    | 0.538487     | 0.59024 | 0.999883 |
| gene1299 | gene1299 | glpD      | gi 57650036 ref NC_002951.2 :1338708-1340382 | MVR | MR150 | OK     | 85.2707 | 91.7534 | 0.105712     | -0.124374    | 0.90102 | 0.999883 |
| gene13   | gene13   | SACOL0014 | gi 57650036 ref NC_002951.2 :18344-20755     | MVR | MR150 | OK     | 104.1   | 112.713 | 0.114675     | -0.117704    | 0.9063  | 0.999883 |
| gene130  | gene130  | cap5A     | gi 57650036 ref NC_002951.2 :153404-154073   | MVR | MR150 | OK     | 3.6785  | 2.61118 | -0.494414    | 0.624212     | 0.53249 | 0.999883 |
| gene1300 | gene1300 | SACOL1322 | gi 57650036 ref NC_002951.2 :1340531-1341446 | MVR | MR150 | OK     | 9.13941 | 11.3504 | 0.312568     | -0.458462    | 0.64662 | 0.999883 |
| gene1301 | gene1301 | miaA      | gi 57650036 ref NC_002951.2 :1341463-1342399 | MVR | MR150 | OK     | 21.7642 | 19.3487 | -0.169721    | 0.246971     | 0.80493 | 0.999883 |
| gene1302 | gene1302 | SACOL1324 | gi 57650036 ref NC_002951.2 :1342413-1342647 | MVR | MR150 | OK     | 39.0355 | 44.717  | 0.196037     | -0.262888    | 0.79264 | 0.999883 |
| gene1303 | gene1303 | gpxA1     | gi 57650036 ref NC_002951.2 :1342868-1343345 | MVR | MR150 | OK     | 109.161 | 126.963 | 0.217951     | -0.300361    | 0.7639  | 0.999883 |
| gene1304 | gene1304 | SACOL1326 | gi 57650036 ref NC_002951.2 :1343456-1344695 | MVR | MR150 | OK     | 14.6927 | 15.6244 | 0.0886986    | -0.128832    | 0.89749 | 0.999883 |
| gene1305 | gene1305 | SACOL1327 | gi 57650036 ref NC_002951.2 :1344713-1345952 | MVR | MR150 | OK     | 20.2241 | 23.8788 | 0.239654     | -0.340483    | 0.73349 | 0.999883 |
| gene1306 | gene1306 | glnR      | gi 57650036 ref NC_002951.2 :1346194-1346563 | MVR | MR150 | OK     | 295.223 | 242.071 | -0.286379    | 0.381844     | 0.70258 | 0.999883 |
| gene1307 | gene1307 | femC      | gi 57650036 ref NC_002951.2 :1346581-1347922 | MVR | MR150 | OK     | 280.536 | 207.515 | -0.434965    | 0.473477     | 0.63587 | 0.999883 |
| gene1308 | gene1308 | SACOL1331 | gi 57650036 ref NC_002951.2 :1348414-1348612 | MVR | MR150 | OK     | 0       | 5.22482 | 1.79769e+30  | 1.79769e+30  | 0.10824 | 0.653986 |
| gene1309 | gene1309 | SACOL1332 | gi 57650036 ref NC_002951.2 :1349300-1349525 | MVR | MR150 | NOTEST | 0       | 0       | 0            | 0            | 1       | 1        |
| gene131  | gene131  | cap5B     | gi 57650036 ref NC_002951.2 :154088-154775   | MVR | MR150 | OK     | 1.51526 | 0.94303 | -0.684187    | 0.704622     | 0.48105 | 0.999883 |
| gene1310 | gene1310 | SACOL1333 | gi 57650036 ref NC_002951.2 :1349818-1350025 | MVR | MR150 | OK     | 3.90755 | 4.33328 | 0.149193     | -0.084102    | 0.93298 | 0.999883 |
| gene1311 | gene1311 | SACOL1334 | gi 57650036 ref NC_002951.2 :1350725-1350836 | MVR | MR150 | NOTEST | 0       | 0       | 0            | 0            | 1       | 1        |
| gene1312 | gene1312 | SACOL1335 | gi 57650036 ref NC_002951.2 :1351263-1351449 | MVR | MR150 | OK     | 3.09916 | 0       | -1.79769e+30 | -1.79769e+30 | 0.22252 | 0.89416  |
| gene1313 | gene1313 | SACOL1336 | gi 57650036 ref NC_002951.2 :1351960-1352065 | MVR | MR150 | NOTEST | 0       | 0       | 0            | 0            | 1       | 1        |
| gene1314 | gene1314 | SACOL1337 | gi 57650036 ref NC_002951.2 :1352097-1352193 | MVR | MR150 | NOTEST | 0       | 0       | 0            | 0            | 1       | 1        |
| gene1315 | gene1315 | SACOL1338 | gi 57650036 ref NC_002951.2 :1352193-1352445 | MVR | MR150 | OK     | 5.00566 | 4.45979 | -0.166584    | 0.141041     | 0.88784 | 0.999883 |
| gene1316 | gene1316 | SACOL1339 | gi 57650036 ref NC_002951.2 :1352649-1353075 | MVR | MR150 | OK     | 0.57315 | 4.05069 | 2.82117      | -1.92184     | 0.05463 | 0.462964 |
| gene1317 | gene1317 | SACOL1340 | gi 57650036 ref NC_002951.2 :1353195-1353444 | MVR | MR150 | OK     | 13.4858 | 23.09   | 0.775829     | -0.921775    | 0.35665 | 0.999883 |
| gene1318 | gene1318 | SACOL1341 | gi 57650036 ref NC_002951.2 :1353573-1353675 | MVR | MR150 | NOTEST | 0       | 0       | 0            | 0            | 1       | 1        |
| gene1319 | gene1319 | SACOL1342 | gi 57650036 ref NC_002951.2 :1353720-1353987 | MVR | MR150 | NOTEST | 0.84903 | 0       | -1.79769e+30 | -1.79769e+30 | 0.22252 | 1        |
| gene132  | gene132  | cap5C     | gi 57650036 ref NC_002951.2 :154777-155542   | MVR | MR150 | OK     | 2.05344 | 1.08391 | -0.921801    | 1.03647      | 0.29998 | 0.982854 |
| gene1320 | gene1320 | SACOL1344 | gi 57650036 ref NC_002951.2 :1354323-1354458 | MVR | MR150 | NOTEST | 0       | 0       | 0            | 0            | 1       | 1        |
| gene1321 | gene1321 | SACOL1345 | gi 57650036 ref NC_002951.2 :1354548-1354839 | MVR | MR150 | OK     | 16.2433 | 13.7019 | -0.245463    | 0.309453     | 0.75698 | 0.999883 |
| gene1322 | gene1322 | SACOL1346 | gi 57650036 ref NC_002951.2 :1354849-1355044 | MVR | MR150 | OK     | 25.0546 | 27.9654 | 0.158567     | -0.170752    | 0.86442 | 0.999883 |

|          |          |           |                                              |     |       |        |         |         |                        |           |         |          |
|----------|----------|-----------|----------------------------------------------|-----|-------|--------|---------|---------|------------------------|-----------|---------|----------|
| gene1323 | gene1323 | SACOL1347 | gi 57650036 ref NC_002951.2 :1355093-1355435 | MVR | MR150 | OK     | 6.44294 | 3.14579 | -1.0343                | 1.08206   | 0.27923 | 0.965481 |
| gene1324 | gene1324 | SACOL1348 | gi 57650036 ref NC_002951.2 :1355441-1355633 | MVR | MR150 | OK     | 2.68265 | 0       | -1.79769e+3(-1.79769e+ | 0.22252   | 0.89416 |          |
| gene1325 | gene1325 | SACOL1349 | gi 57650036 ref NC_002951.2 :1356181-1357207 | MVR | MR150 | OK     | 2.62497 | 1.48314 | -0.823649              | 1.05748   | 0.29029 | 0.975616 |
| gene1326 | gene1326 | SACOL1350 | gi 57650036 ref NC_002951.2 :1357476-1357674 | MVR | MR150 | OK     | 65.6898 | 83.5971 | 0.347784               | -0.462639 | 0.64362 | 0.999883 |
| gene1327 | gene1327 | cls1      | gi 57650036 ref NC_002951.2 :1357731-1359213 | MVR | MR150 | OK     | 33.706  | 33.5707 | -0.0058036             | 0.007743  | 0.99382 | 0.999883 |
| gene1328 | gene1328 | SACOL1352 | gi 57650036 ref NC_002951.2 :1359387-1360996 | MVR | MR150 | OK     | 2.81705 | 3.23954 | 0.201606               | -0.198236 | 0.84286 | 0.999883 |
| gene1329 | gene1329 | SACOL1353 | gi 57650036 ref NC_002951.2 :1359387-1360996 | MVR | MR150 | OK     | 4.83388 | 4.3166  | -0.163288              | 0.170494  | 0.86462 | 0.999883 |
| gene133  | gene133  | cap5D     | gi 57650036 ref NC_002951.2 :155561-158403   | MVR | MR150 | OK     | 1.75466 | 1.60336 | -0.130085              | 0.149752  | 0.88096 | 0.999883 |
| gene1330 | gene1330 | SACOL1354 | gi 57650036 ref NC_002951.2 :1360999-1362690 | MVR | MR150 | OK     | 13.0704 | 10.1292 | -0.367791              | 0.366137  | 0.71426 | 0.999883 |
| gene1331 | gene1331 | SACOL1355 | gi 57650036 ref NC_002951.2 :1360999-1362690 | MVR | MR150 | OK     | 25.1377 | 28.8649 | 0.199463               | -0.20258  | 0.83946 | 0.999883 |
| gene1332 | gene1332 | SACOL1356 | gi 57650036 ref NC_002951.2 :1362962-1363070 | MVR | MR150 | NOTEST | 0       | 0       | 0                      | 0         | 1       | 1        |
| gene1333 | gene1333 | SACOL1357 | gi 57650036 ref NC_002951.2 :1363129-1363663 | MVR | MR150 | OK     | 12.0566 | 14.66   | 0.282056               | -0.40511  | 0.6854  | 0.999883 |
| gene1334 | gene1334 | SACOL1358 | gi 57650036 ref NC_002951.2 :1363805-1364660 | MVR | MR150 | OK     | 56.6198 | 55.6359 | -0.0252885             | 0.03434   | 0.97261 | 0.999883 |
| gene1335 | gene1335 | SACOL1359 | gi 57650036 ref NC_002951.2 :1364975-1365566 | MVR | MR150 | OK     | 175.652 | 229.386 | 0.38506                | -0.482432 | 0.6295  | 0.999883 |
| gene1336 | gene1336 | SACOL1360 | gi 57650036 ref NC_002951.2 :1365619-1367002 | MVR | MR150 | OK     | 46.2226 | 48.5488 | 0.0708364              | -0.092054 | 0.92666 | 0.999883 |
| gene1337 | gene1337 | SACOL1361 | gi 57650036 ref NC_002951.2 :1367007-1367115 | MVR | MR150 | NOTEST | 0       | 0       | 0                      | 0         | 1       | 1        |
| gene1338 | gene1338 | hom       | gi 57650036 ref NC_002951.2 :1367192-1368473 | MVR | MR150 | OK     | 211.525 | 238.864 | 0.175361               | -0.193252 | 0.84676 | 0.999883 |
| gene1339 | gene1339 | thrC      | gi 57650036 ref NC_002951.2 :1368478-1369540 | MVR | MR150 | OK     | 328.615 | 339.673 | 0.0477463              | -0.051769 | 0.95871 | 0.999883 |
| gene134  | gene134  | cap5E     | gi 57650036 ref NC_002951.2 :155561-158403   | MVR | MR150 | OK     | 2.17933 | 1.47777 | -0.560458              | 0.472664  | 0.63645 | 0.999883 |
| gene1340 | gene1340 | thrB      | gi 57650036 ref NC_002951.2 :1369541-1370456 | MVR | MR150 | OK     | 195.059 | 207.091 | 0.0863561              | -0.100584 | 0.91988 | 0.999883 |
| gene1341 | gene1341 | SACOL1365 | gi 57650036 ref NC_002951.2 :1370513-1371317 | MVR | MR150 | OK     | 328.949 | 333.847 | 0.0213228              | -0.023981 | 0.98087 | 0.999883 |
| gene1342 | gene1342 | SACOL1366 | gi 57650036 ref NC_002951.2 :1371609-1371924 | MVR | MR150 | OK     | 126.522 | 138.616 | 0.131699               | -0.191516 | 0.84812 | 0.999883 |
| gene1343 | gene1343 | SACOL1367 | gi 57650036 ref NC_002951.2 :1372141-1373596 | MVR | MR150 | OK     | 27.7937 | 38.5641 | 0.472501               | -0.633638 | 0.52632 | 0.999883 |
| gene1344 | gene1344 | kataA     | gi 57650036 ref NC_002951.2 :1373895-1375317 | MVR | MR150 | OK     | 469.834 | 537.176 | 0.193245               | -0.198578 | 0.84259 | 0.999883 |
| gene1345 | gene1345 | rpmG      | gi 57650036 ref NC_002951.2 :1375407-1375557 | MVR | MR150 | OK     | 429.349 | 694.511 | 0.693847               | -0.967482 | 0.3333  | 0.999883 |
| gene1346 | gene1346 | rpsN      | gi 57650036 ref NC_002951.2 :1376010-1376280 | MVR | MR150 | OK     | 13.9983 | 16.5837 | 0.244508               | -0.297882 | 0.76579 | 0.999883 |
| gene1347 | gene1347 | guaC      | gi 57650036 ref NC_002951.2 :1376436-1377515 | MVR | MR150 | OK     | 20.8626 | 6.69204 | -1.6404                | 2.36693   | 0.01794 | 0.242627 |
| gene1348 | gene1348 | SACOL1372 | gi 57650036 ref NC_002951.2 :1376436-1377515 | MVR | MR150 | NOTEST | 0       | 0       | 0                      | 0         | 1       | 1        |
| gene1349 | gene1349 | SACOL1373 | gi 57650036 ref NC_002951.2 :1377588-1378452 | MVR | MR150 | OK     | 22.3844 | 17.9866 | -0.315567              | 0.461107  | 0.64472 | 0.999883 |
| gene135  | gene135  | cap5F     | gi 57650036 ref NC_002951.2 :158415-159525   | MVR | MR150 | OK     | 2.83821 | 1.51458 | -0.90607               | 1.18858   | 0.23461 | 0.903063 |
| gene1350 | gene1350 | lexA      | gi 57650036 ref NC_002951.2 :1378831-1379455 | MVR | MR150 | OK     | 607.783 | 657.396 | 0.113208               | -0.123776 | 0.90149 | 0.999883 |
| gene1351 | gene1351 | SACOL1375 | gi 57650036 ref NC_002951.2 :1379597-1379831 | MVR | MR150 | OK     | 180.067 | 363.326 | 1.01273                | -1.47064  | 0.14139 | 0.739856 |
| gene1352 | gene1352 | SACOL1376 | gi 57650036 ref NC_002951.2 :1379966-1380206 | MVR | MR150 | OK     | 46.4522 | 77.4024 | 0.736632               | -1.03152  | 0.3023  | 0.987655 |

|          |          |           |                                              |     |       |        |         |         |            |           |         |          |
|----------|----------|-----------|----------------------------------------------|-----|-------|--------|---------|---------|------------|-----------|---------|----------|
| gene1353 | gene1353 | tkt       | gi 57650036 ref NC_002951.2 :1380326-1382315 | MVR | MR150 | OK     | 237.769 | 244.527 | 0.0404337  | -0.042286 | 0.96627 | 0.999883 |
| gene1354 | gene1354 | SACOL1378 | gi 57650036 ref NC_002951.2 :1382592-1382920 | MVR | MR150 | OK     | 463.645 | 484.291 | 0.0628525  | -0.087914 | 0.92995 | 0.999883 |
| gene1355 | gene1355 | SACOL1379 | gi 57650036 ref NC_002951.2 :1382592-1382920 | MVR | MR150 | NOTEST | 0       | 0       | 0          | 0         | 1       | 1        |
| gene1356 | gene1356 | SACOL1380 | gi 57650036 ref NC_002951.2 :1383013-1383481 | MVR | MR150 | OK     | 44.3855 | 44.4936 | 0.003508   | -0.005145 | 0.9959  | 0.999883 |
| gene1357 | gene1357 | sbcd      | gi 57650036 ref NC_002951.2 :1383604-1384726 | MVR | MR150 | OK     | 7.35893 | 8.96923 | 0.285489   | -0.419029 | 0.6752  | 0.999883 |
| gene1358 | gene1358 | sbcc      | gi 57650036 ref NC_002951.2 :1384729-1387759 | MVR | MR150 | OK     | 10.9231 | 10.9881 | 0.00855655 | -0.011811 | 0.99058 | 0.999883 |
| gene1359 | gene1359 | mssl      | gi 57650036 ref NC_002951.2 :1387829-1388192 | MVR | MR150 | OK     | 672.616 | 671.75  | -0.0018574 | 0.002241  | 0.99821 | 0.999883 |
| gene136  | gene136  | cap5G     | gi 57650036 ref NC_002951.2 :159528-160653   | MVR | MR150 | OK     | 2.9857  | 2.15226 | -0.472216  | 0.640785  | 0.52166 | 0.999883 |
| gene1360 | gene1360 | opuD1     | gi 57650036 ref NC_002951.2 :1388395-1390042 | MVR | MR150 | OK     | 207.891 | 232.869 | 0.163691   | -0.175684 | 0.86054 | 0.999883 |
| gene1361 | gene1361 | acnA      | gi 57650036 ref NC_002951.2 :1390933-1393639 | MVR | MR150 | OK     | 220.559 | 283.073 | 0.36001    | -0.369798 | 0.71153 | 0.999883 |
| gene1362 | gene1362 | SACOL1386 | gi 57650036 ref NC_002951.2 :1393818-1394286 | MVR | MR150 | OK     | 75.8849 | 77.0081 | 0.0211972  | -0.030432 | 0.97572 | 0.999883 |
| gene1363 | gene1363 | SACOL1387 | gi 57650036 ref NC_002951.2 :1394492-1394789 | MVR | MR150 | OK     | 78.4592 | 59.3894 | -0.401737  | 0.588713  | 0.55605 | 0.999883 |
| gene1364 | gene1364 | SACOL1388 | gi 57650036 ref NC_002951.2 :1395164-1395773 | MVR | MR150 | OK     | 208.298 | 194.228 | -0.100894  | 0.125764  | 0.89992 | 0.999883 |
| gene1365 | gene1365 | parE      | gi 57650036 ref NC_002951.2 :1395972-1400372 | MVR | MR150 | OK     | 54.7638 | 49.3251 | -0.150902  | 0.110418  | 0.91208 | 0.999883 |
| gene1366 | gene1366 | parC      | gi 57650036 ref NC_002951.2 :1395972-1400372 | MVR | MR150 | OK     | 54.5452 | 56.9463 | 0.0621481  | -0.052165 | 0.9584  | 0.999883 |
| gene1367 | gene1367 | SACOL1392 | gi 57650036 ref NC_002951.2 :1400621-1402097 | MVR | MR150 | OK     | 68.5759 | 75.3791 | 0.136462   | -0.167454 | 0.86701 | 0.999883 |
| gene1368 | gene1368 | SACOL1393 | gi 57650036 ref NC_002951.2 :1402581-1404776 | MVR | MR150 | OK     | 22.6257 | 28.1807 | 0.316747   | -0.155784 | 0.8762  | 0.999883 |
| gene1369 | gene1369 | SACOL1394 | gi 57650036 ref NC_002951.2 :1402581-1404776 | MVR | MR150 | OK     | 62.3313 | 108.032 | 0.793425   | -0.094774 | 0.92449 | 0.999883 |
| gene137  | gene137  | cap5H     | gi 57650036 ref NC_002951.2 :160655-161282   | MVR | MR150 | NOTEST | 0       | 0       | 0          | 0         | 1       | 1        |
| gene1370 | gene1370 | SACOL1395 | gi 57650036 ref NC_002951.2 :1402581-1404776 | MVR | MR150 | OK     | 78.3128 | 84.9972 | 0.118167   | -0.130413 | 0.89624 | 0.999883 |
| gene1371 | gene1371 | fmtC      | gi 57650036 ref NC_002951.2 :1405256-1407779 | MVR | MR150 | OK     | 223.026 | 262.31  | 0.234062   | -0.241298 | 0.80933 | 0.999883 |
| gene1372 | gene1372 | msrA      | gi 57650036 ref NC_002951.2 :1407981-1408491 | MVR | MR150 | OK     | 25.9151 | 24.1811 | -0.0999169 | 0.14676   | 0.88332 | 0.999883 |
| gene1373 | gene1373 | SACOL1398 | gi 57650036 ref NC_002951.2 :1408627-1409611 | MVR | MR150 | OK     | 28.777  | 22.0711 | -0.382762  | 0.549352  | 0.58276 | 0.999883 |
| gene1374 | gene1374 | dmpI      | gi 57650036 ref NC_002951.2 :1409698-1409884 | MVR | MR150 | OK     | 142.561 | 314.174 | 1.13998    | -1.62178  | 0.10485 | 0.650217 |
| gene1375 | gene1375 | SACOL1400 | gi 57650036 ref NC_002951.2 :1410031-1411294 | MVR | MR150 | OK     | 46.1561 | 80.825  | 0.808281   | -1.0307   | 0.30268 | 0.987655 |
| gene1376 | gene1376 | tyrA      | gi 57650036 ref NC_002951.2 :1411430-1412522 | MVR | MR150 | OK     | 46.9592 | 68.844  | 0.551922   | -0.724161 | 0.46897 | 0.999883 |
| gene1377 | gene1377 | SACOL1402 | gi 57650036 ref NC_002951.2 :1412686-1413718 | MVR | MR150 | OK     | 61.9527 | 66.2601 | 0.0969747  | -0.126731 | 0.89915 | 0.999883 |
| gene1378 | gene1378 | trpE      | gi 57650036 ref NC_002951.2 :1414209-1416179 | MVR | MR150 | OK     | 1.33482 | 0.76134 | -0.810035  | 0.911284  | 0.36215 | 0.999883 |
| gene1379 | gene1379 | trpG      | gi 57650036 ref NC_002951.2 :1414209-1416179 | MVR | MR150 | NOTEST | 0.85177 | 0.83401 | -0.0303913 | 0.01674   | 0.98664 | 1        |
| gene138  | gene138  | cap5I     | gi 57650036 ref NC_002951.2 :161286-162396   | MVR | MR150 | NOTEST | 0       | 0       | 0          | 0         | 1       | 1        |
| gene1380 | gene1380 | trpD      | gi 57650036 ref NC_002951.2 :1416184-1417183 | MVR | MR150 | OK     | 0.98092 | 1.14992 | 0.229334   | -0.260581 | 0.79442 | 0.999883 |
| gene1381 | gene1381 | trpC      | gi 57650036 ref NC_002951.2 :1417184-1420527 | MVR | MR150 | OK     | 2.19654 | 0.52523 | -2.06421   | 0.992087  | 0.32116 | 0.999883 |
| gene1382 | gene1382 | trpF      | gi 57650036 ref NC_002951.2 :1417184-1420527 | MVR | MR150 | OK     | 1.84452 | 1.75541 | -0.0714421 | 0.039913  | 0.96816 | 0.999883 |



|          |          |           |                                              |     |       |        |         |         |                        |           |         |          |
|----------|----------|-----------|----------------------------------------------|-----|-------|--------|---------|---------|------------------------|-----------|---------|----------|
| gene1383 | gene1383 | trpB      | gi 57650036 ref NC_002951.2 :1417184-1420527 | MVR | MR150 | OK     | 1.71139 | 1.05619 | -0.696304              | 0.524105  | 0.60021 | 0.999883 |
| gene1384 | gene1384 | trpA      | gi 57650036 ref NC_002951.2 :1417184-1420527 | MVR | MR150 | OK     | 5.20991 | 3.18344 | -0.71067               | 0.670837  | 0.50233 | 0.999883 |
| gene1385 | gene1385 | femA      | gi 57650036 ref NC_002951.2 :1420809-1422111 | MVR | MR150 | OK     | 95.4835 | 98.534  | 0.0453697              | -0.054664 | 0.95641 | 0.999883 |
| gene1386 | gene1386 | SACOL1411 | gi 57650036 ref NC_002951.2 :1422129-1423389 | MVR | MR150 | OK     | 182.731 | 167.453 | -0.125967              | 0.142665  | 0.88656 | 0.999883 |
| gene1387 | gene1387 | SACOL1412 | gi 57650036 ref NC_002951.2 :1424071-1424839 | MVR | MR150 | OK     | 6.87871 | 5.66047 | -0.281217              | 0.39802   | 0.69062 | 0.999883 |
| gene1388 | gene1388 | SACOL1413 | gi 57650036 ref NC_002951.2 :1424886-1425360 | MVR | MR150 | OK     | 63.8453 | 75.8909 | 0.249346               | -0.359146 | 0.71949 | 0.999883 |
| gene1389 | gene1389 | SACOL1414 | gi 57650036 ref NC_002951.2 :1425483-1428747 | MVR | MR150 | OK     | 10.1519 | 7.01403 | -0.533429              | 0.519323  | 0.60354 | 0.999883 |
| gene139  | gene139  | cap5J     | gi 57650036 ref NC_002951.2 :162409-164774   | MVR | MR150 | NOTEST | 0       | 0       | 0                      | 0         | 1       | 1        |
| gene1390 | gene1390 | SACOL1415 | gi 57650036 ref NC_002951.2 :1425483-1428747 | MVR | MR150 | OK     | 2.33877 | 2.13384 | -0.132299              | 0.071032  | 0.94337 | 0.999883 |
| gene1391 | gene1391 | SACOL1416 | gi 57650036 ref NC_002951.2 :1425483-1428747 | MVR | MR150 | OK     | 2.98622 | 2.4265  | -0.299441              | 0.185209  | 0.85307 | 0.999883 |
| gene1392 | gene1392 | SACOL1417 | gi 57650036 ref NC_002951.2 :1425483-1428747 | MVR | MR150 | OK     | 2.52917 | 3.30778 | 0.387196               | -0.27547  | 0.78296 | 0.999883 |
| gene1393 | gene1393 | SACOL1418 | gi 57650036 ref NC_002951.2 :1429050-1429395 | MVR | MR150 | OK     | 23.9096 | 26.7537 | 0.162147               | -0.229613 | 0.81839 | 0.999883 |
| gene1394 | gene1394 | SACOL1419 | gi 57650036 ref NC_002951.2 :1429599-1431414 | MVR | MR150 | OK     | 37.9385 | 46.5669 | 0.295645               | -0.37586  | 0.70702 | 0.999883 |
| gene1395 | gene1395 | SACOL1420 | gi 57650036 ref NC_002951.2 :1431553-1432195 | MVR | MR150 | OK     | 4.33542 | 6.92639 | 0.675933               | -0.916511 | 0.3594  | 0.999883 |
| gene1396 | gene1396 | SACOL1421 | gi 57650036 ref NC_002951.2 :1432201-1433053 | MVR | MR150 | OK     | 4.09683 | 5.16647 | 0.334669               | -0.466425 | 0.64091 | 0.999883 |
| gene1397 | gene1397 | SACOL1422 | gi 57650036 ref NC_002951.2 :1433099-1434017 | MVR | MR150 | OK     | 3.79163 | 4.47854 | 0.240209               | -0.334531 | 0.73798 | 0.999883 |
| gene1398 | gene1398 | SACOL1423 | gi 57650036 ref NC_002951.2 :1434018-1434945 | MVR | MR150 | OK     | 2.91131 | 3.58063 | 0.298545               | -0.405194 | 0.68534 | 0.999883 |
| gene1399 | gene1399 | SACOL1424 | gi 57650036 ref NC_002951.2 :1435135-1436119 | MVR | MR150 | OK     | 12.6188 | 16.2115 | 0.361441               | -0.530056 | 0.59607 | 0.999883 |
| gene14   | gene14   | rplI      | gi 57650036 ref NC_002951.2 :18344-20755     | MVR | MR150 | OK     | 88.8435 | 93.3919 | 0.0720321              | -0.025605 | 0.97957 | 0.999883 |
| gene140  | gene140  | cap5K     | gi 57650036 ref NC_002951.2 :162409-164774   | MVR | MR150 | NOTEST | 0       | 0       | 0                      | 0         | 1       | 1        |
| gene1400 | gene1400 | SACOL1425 | gi 57650036 ref NC_002951.2 :1436658-1436955 | MVR | MR150 | NOTEST | 0.64311 | 0       | -1.79769e+3(-1.79769e+ | 0.22252   | 1       |          |
| gene1401 | gene1401 | SACOL1426 | gi 57650036 ref NC_002951.2 :1437090-1437993 | MVR | MR150 | OK     | 163.11  | 180.348 | 0.144943               | -0.172271 | 0.86323 | 0.999883 |
| gene1402 | gene1402 | SACOL1427 | gi 57650036 ref NC_002951.2 :1438139-1439741 | MVR | MR150 | OK     | 29.9225 | 28.2947 | -0.080701              | 0.10828   | 0.91377 | 0.999883 |
| gene1403 | gene1403 | lysC      | gi 57650036 ref NC_002951.2 :1440600-1441806 | MVR | MR150 | OK     | 8.5758  | 8.37282 | -0.0345573             | 0.050815  | 0.95947 | 0.999883 |
| gene1404 | gene1404 | asd       | gi 57650036 ref NC_002951.2 :1441869-1442859 | MVR | MR150 | OK     | 38.7815 | 36.6351 | -0.0821417             | 0.113983  | 0.90925 | 0.999883 |
| gene1405 | gene1405 | dapA      | gi 57650036 ref NC_002951.2 :1442860-1444467 | MVR | MR150 | OK     | 35.93   | 36.9446 | 0.0401747              | -0.04021  | 0.96793 | 0.999883 |
| gene1406 | gene1406 | dapB      | gi 57650036 ref NC_002951.2 :1442860-1444467 | MVR | MR150 | OK     | 33.5098 | 40.6883 | 0.280032               | -0.245413 | 0.80614 | 0.999883 |
| gene1407 | gene1407 | dapD      | gi 57650036 ref NC_002951.2 :1444493-1445213 | MVR | MR150 | OK     | 80.0374 | 61.8259 | -0.372462              | 0.506236  | 0.61269 | 0.999883 |
| gene1408 | gene1408 | SACOL1433 | gi 57650036 ref NC_002951.2 :1445355-1446507 | MVR | MR150 | OK     | 21.6784 | 29.2774 | 0.433529               | -0.612891 | 0.53995 | 0.999883 |
| gene1409 | gene1409 | SACOL1434 | gi 57650036 ref NC_002951.2 :1446511-1448852 | MVR | MR150 | OK     | 11.7367 | 18.3213 | 0.642499               | -0.390298 | 0.69632 | 0.999883 |
| gene141  | gene141  | cap5L     | gi 57650036 ref NC_002951.2 :164774-165980   | MVR | MR150 | OK     | 2.67994 | 0.9134  | -1.55288               | 1.95105   | 0.05105 | 0.444597 |
| gene1410 | gene1410 | lysA      | gi 57650036 ref NC_002951.2 :1446511-1448852 | MVR | MR150 | OK     | 44.0027 | 39.2213 | -0.165954              | 0.188257  | 0.85068 | 0.999883 |
| gene1411 | gene1411 | SACOL1436 | gi 57650036 ref NC_002951.2 :1449091-1449493 | MVR | MR150 | NOTEST | 0       | 0       | 0                      | 0         | 1       | 1        |

|          |          |           |                                              |     |       |    |         |         |                               |           |          |          |
|----------|----------|-----------|----------------------------------------------|-----|-------|----|---------|---------|-------------------------------|-----------|----------|----------|
| gene1412 | gene1412 | SACOL1437 | gi 57650036 ref NC_002951.2 :1449689-1449890 | MVR | MR150 | OK | 3893.23 | 3847.5  | -0.0170453                    | 0.020405  | 0.98372  | 0.999883 |
| gene1413 | gene1413 | SACOL1438 | gi 57650036 ref NC_002951.2 :1450060-1450369 | MVR | MR150 | OK | 66.5397 | 57.9846 | -0.198546                     | 0.291011  | 0.77104  | 0.999883 |
| gene1414 | gene1414 | SACOL1439 | gi 57650036 ref NC_002951.2 :1450531-1450801 | MVR | MR150 | OK | 194.33  | 270.866 | 0.479075                      | -0.689913 | 0.49025  | 0.999883 |
| gene1415 | gene1415 | SACOL1440 | gi 57650036 ref NC_002951.2 :1450819-1451449 | MVR | MR150 | OK | 83.9405 | 105.369 | 0.328009                      | -0.441401 | 0.65892  | 0.999883 |
| gene1416 | gene1416 | SACOL1441 | gi 57650036 ref NC_002951.2 :1451480-1452617 | MVR | MR150 | OK | 126.506 | 169.813 | 0.424743                      | -0.497087 | 0.61913  | 0.999883 |
| gene1417 | gene1417 | SACOL1442 | gi 57650036 ref NC_002951.2 :1452884-1453277 | MVR | MR150 | OK | 1.01558 | 0       | -1.79769e+3(-1.79769e+0.09295 |           | 0.611738 |          |
| gene1418 | gene1418 | brnQ3     | gi 57650036 ref NC_002951.2 :1453629-1454973 | MVR | MR150 | OK | 8.6682  | 11.1117 | 0.358271                      | -0.525383 | 0.59932  | 0.999883 |
| gene1419 | gene1419 | SACOL1444 | gi 57650036 ref NC_002951.2 :1455197-1457084 | MVR | MR150 | OK | 6.99897 | 7.35433 | 0.0714507                     | -0.104672 | 0.91664  | 0.999883 |
| gene142  | gene142  | cap5M     | gi 57650036 ref NC_002951.2 :165990-167435   | MVR | MR150 | OK | 2.274   | 1.70988 | -0.411335                     | 0.273978  | 0.7841   | 0.999883 |
| gene1420 | gene1420 | SACOL1445 | gi 57650036 ref NC_002951.2 :1457097-1457889 | MVR | MR150 | OK | 12.5588 | 9.82777 | -0.353758                     | 0.517752  | 0.60463  | 0.999883 |
| gene1421 | gene1421 | SACOL1446 | gi 57650036 ref NC_002951.2 :1458069-1458273 | MVR | MR150 | OK | 111.871 | 151.769 | 0.440045                      | -0.627954 | 0.53003  | 0.999883 |
| gene1422 | gene1422 | SACOL1447 | gi 57650036 ref NC_002951.2 :1458301-1459111 | MVR | MR150 | OK | 119.337 | 171.934 | 0.526814                      | -0.65063  | 0.51529  | 0.999883 |
| gene1423 | gene1423 | sucB      | gi 57650036 ref NC_002951.2 :1459690-1460959 | MVR | MR150 | OK | 230.071 | 255.441 | 0.150909                      | -0.16526  | 0.86874  | 0.999883 |
| gene1424 | gene1424 | sucA      | gi 57650036 ref NC_002951.2 :1460972-1463771 | MVR | MR150 | OK | 197.783 | 227.68  | 0.203088                      | -0.209496 | 0.83406  | 0.999883 |
| gene1425 | gene1425 | arlS      | gi 57650036 ref NC_002951.2 :1464054-1466066 | MVR | MR150 | OK | 9.04131 | 8.08166 | -0.161881                     | 0.178813  | 0.85808  | 0.999883 |
| gene1426 | gene1426 | arlR      | gi 57650036 ref NC_002951.2 :1464054-1466066 | MVR | MR150 | OK | 13.2744 | 17.6373 | 0.409986                      | -0.378535 | 0.70503  | 0.999883 |
| gene1427 | gene1427 | SACOL1452 | gi 57650036 ref NC_002951.2 :1466853-1467468 | MVR | MR150 | OK | 30.796  | 35.7765 | 0.216272                      | -0.315769 | 0.75218  | 0.999883 |
| gene1428 | gene1428 | murG      | gi 57650036 ref NC_002951.2 :1467484-1468555 | MVR | MR150 | OK | 20.5058 | 17.2302 | -0.251096                     | 0.364095  | 0.71579  | 0.999883 |
| gene1429 | gene1429 | SACOL1454 | gi 57650036 ref NC_002951.2 :1468566-1469077 | MVR | MR150 | OK | 8.33744 | 7.37864 | -0.176249                     | 0.239913  | 0.8104   | 0.999883 |
| gene143  | gene143  | cap5N     | gi 57650036 ref NC_002951.2 :165990-167435   | MVR | MR150 | OK | 4.22706 | 2.44814 | -0.78797                      | 0.947233  | 0.34352  | 0.999883 |
| gene1430 | gene1430 | SACOL1455 | gi 57650036 ref NC_002951.2 :1469476-1470967 | MVR | MR150 | OK | 33.1435 | 37.9636 | 0.195888                      | -0.259785 | 0.79503  | 0.999883 |
| gene1431 | gene1431 | SACOL1456 | gi 57650036 ref NC_002951.2 :1471158-1471880 | MVR | MR150 | OK | 212.143 | 236.752 | 0.158343                      | -0.109507 | 0.9128   | 0.999883 |
| gene1432 | gene1432 | SACOL1457 | gi 57650036 ref NC_002951.2 :1471158-1471880 | MVR | MR150 | OK | 87.616  | 99.0984 | 0.177667                      | -0.207267 | 0.8358   | 0.999883 |
| gene1433 | gene1433 | SACOL1459 | gi 57650036 ref NC_002951.2 :1471891-1473771 | MVR | MR150 | OK | 86.1333 | 101.858 | 0.241911                      | -0.250113 | 0.8025   | 0.999883 |
| gene1434 | gene1434 | SACOL1460 | gi 57650036 ref NC_002951.2 :1471891-1473771 | MVR | MR150 | OK | 39.1082 | 50.9581 | 0.38184                       | -0.232994 | 0.81577  | 0.999883 |
| gene1435 | gene1435 | folA      | gi 57650036 ref NC_002951.2 :1473785-1474265 | MVR | MR150 | OK | 48.033  | 50.7905 | 0.080531                      | -0.117638 | 0.90636  | 0.999883 |
| gene1436 | gene1436 | thyA      | gi 57650036 ref NC_002951.2 :1474464-1475421 | MVR | MR150 | OK | 20.1836 | 28.1172 | 0.478269                      | -0.689426 | 0.49056  | 0.999883 |
| gene1437 | gene1437 | SACOL1464 | gi 57650036 ref NC_002951.2 :1475844-1476282 | MVR | MR150 | OK | 122.282 | 100.088 | -0.288946                     | 0.406955  | 0.68404  | 0.999883 |
| gene1438 | gene1438 | SACOL1465 | gi 57650036 ref NC_002951.2 :1476297-1477422 | MVR | MR150 | OK | 60.6875 | 68.0445 | 0.165078                      | -0.213201 | 0.83117  | 0.999883 |
| gene1439 | gene1439 | SACOL1466 | gi 57650036 ref NC_002951.2 :1477459-1477711 | MVR | MR150 | OK | 50.0566 | 55.7474 | 0.155344                      | -0.219059 | 0.8266   | 0.999883 |
| gene144  | gene144  | cap5O     | gi 57650036 ref NC_002951.2 :167488-168751   | MVR | MR150 | OK | 3.88386 | 3.02553 | -0.360303                     | 0.511309  | 0.60913  | 0.999883 |
| gene1440 | gene1440 | SACOL1467 | gi 57650036 ref NC_002951.2 :1477722-1477917 | MVR | MR150 | OK | 25.0546 | 22.3723 | -0.163361                     | 0.171373  | 0.86393  | 0.999883 |
| gene1441 | gene1441 | SACOL1468 | gi 57650036 ref NC_002951.2 :1478161-1478866 | MVR | MR150 | OK | 4.98352 | 7.27554 | 0.54589                       | -0.760219 | 0.44712  | 0.999883 |

|          |          |           |                                              |     |       |        |         |         |              |                   |          |          |
|----------|----------|-----------|----------------------------------------------|-----|-------|--------|---------|---------|--------------|-------------------|----------|----------|
| gene1442 | gene1442 | SACOL1469 | gi 57650036 ref NC_002951.2 :1478930-1479062 | MVR | MR150 | OK     | 217.965 | 0       | -1.79769e+31 | -1.79769e+0.02679 | 0.309278 |          |
| gene1443 | gene1443 | SACOL1471 | gi 57650036 ref NC_002951.2 :1479406-1479808 | MVR | MR150 | OK     | 3.87325 | 3.76651 | -0.0403152   | 0.04446           | 0.96454  | 0.999883 |
| gene1444 | gene1444 | ebh       | gi 57650036 ref NC_002951.2 :1479866-1511363 | MVR | MR150 | OK     | 2.35691 | 1.93357 | -0.285628    | 0.363527          | 0.71621  | 0.999883 |
| gene1445 | gene1445 | SACOL1475 | gi 57650036 ref NC_002951.2 :1511760-1513152 | MVR | MR150 | OK     | 2.70392 | 2.18426 | -0.307905    | 0.42822           | 0.66849  | 0.999883 |
| gene1446 | gene1446 | SACOL1476 | gi 57650036 ref NC_002951.2 :1513308-1514631 | MVR | MR150 | OK     | 4.15082 | 2.31843 | -0.840249    | 1.18401           | 0.23641  | 0.90647  |
| gene1447 | gene1447 | ilvA1     | gi 57650036 ref NC_002951.2 :1514661-1515702 | MVR | MR150 | OK     | 2.93468 | 1.82087 | -0.688575    | 0.909707          | 0.36298  | 0.999883 |
| gene1448 | gene1448 | ald1      | gi 57650036 ref NC_002951.2 :1515796-1516915 | MVR | MR150 | OK     | 2.679   | 1.66639 | -0.68497     | 0.904944          | 0.3655   | 0.999883 |
| gene1449 | gene1449 | SACOL1479 | gi 57650036 ref NC_002951.2 :1517389-1518268 | MVR | MR150 | OK     | 54.4567 | 52.092  | -0.0640494   | 0.08712           | 0.93058  | 0.999883 |
| gene145  | gene145  | cap5P     | gi 57650036 ref NC_002951.2 :168797-169973   | MVR | MR150 | OK     | 8.60025 | 6.90407 | -0.316932    | 0.465276          | 0.64173  | 0.999883 |
| gene1450 | gene1450 | SACOL1480 | gi 57650036 ref NC_002951.2 :1518287-1521728 | MVR | MR150 | OK     | 36.4016 | 35.0234 | -0.0556825   | 0.066399          | 0.94706  | 0.999883 |
| gene1451 | gene1451 | SACOL1481 | gi 57650036 ref NC_002951.2 :1522031-1523372 | MVR | MR150 | OK     | 2.46084 | 1.87918 | -0.389045    | 0.531172          | 0.5953   | 0.999883 |
| gene1452 | gene1452 | SACOL1482 | gi 57650036 ref NC_002951.2 :1523577-1523910 | MVR | MR150 | OK     | 17.6157 | 21.1213 | 0.261837     | -0.358053         | 0.7203   | 0.999883 |
| gene1453 | gene1453 | SACOL1483 | gi 57650036 ref NC_002951.2 :1523993-1525139 | MVR | MR150 | OK     | 13.5737 | 13.4364 | -0.0146658   | 0.021459          | 0.98288  | 0.999883 |
| gene1454 | gene1454 | SACOL1484 | gi 57650036 ref NC_002951.2 :1525789-1526134 | MVR | MR150 | OK     | 124.51  | 147.145 | 0.240975     | -0.346381         | 0.72906  | 0.999883 |
| gene1455 | gene1455 | SACOL1485 | gi 57650036 ref NC_002951.2 :1526147-1527054 | MVR | MR150 | OK     | 75.614  | 81.9852 | 0.116709     | -0.126595         | 0.89926  | 0.999883 |
| gene1456 | gene1456 | SACOL1486 | gi 57650036 ref NC_002951.2 :1526147-1527054 | MVR | MR150 | OK     | 106.716 | 92.2271 | -0.210517    | 0.163942          | 0.86978  | 0.999883 |
| gene1457 | gene1457 | SACOL1488 | gi 57650036 ref NC_002951.2 :1527487-1530400 | MVR | MR150 | NOTEST | 0       | 0       | 0            | 0                 | 1        | 1        |
| gene1458 | gene1458 | recU      | gi 57650036 ref NC_002951.2 :1527487-1530400 | MVR | MR150 | OK     | 72.3802 | 84.6    | 0.225062     | -0.062827         | 0.9499   | 0.999883 |
| gene1459 | gene1459 | pbp2      | gi 57650036 ref NC_002951.2 :1527487-1530400 | MVR | MR150 | OK     | 206.954 | 218.413 | 0.0777473    | -0.078051         | 0.93779  | 0.999883 |
| gene146  | gene146  | SACOL0152 | gi 57650036 ref NC_002951.2 :170037-170364   | MVR | MR150 | OK     | 27.0518 | 13.8904 | -0.961639    | 1.30593           | 0.19158  | 0.851905 |
| gene1460 | gene1460 | SACOL1491 | gi 57650036 ref NC_002951.2 :1530965-1531307 | MVR | MR150 | OK     | 32.6749 | 44.041  | 0.430664     | -0.624117         | 0.53255  | 0.999883 |
| gene1461 | gene1461 | nth       | gi 57650036 ref NC_002951.2 :1531311-1532647 | MVR | MR150 | OK     | 31.2417 | 35.6073 | 0.188703     | -0.186828         | 0.8518   | 0.999883 |
| gene1462 | gene1462 | SACOL1493 | gi 57650036 ref NC_002951.2 :1531311-1532647 | MVR | MR150 | OK     | 28.9162 | 31.7487 | 0.13482      | -0.130982         | 0.89579  | 0.999883 |
| gene1463 | gene1463 | asnC      | gi 57650036 ref NC_002951.2 :1532974-1534267 | MVR | MR150 | OK     | 89.0109 | 93.6001 | 0.0725279    | -0.088118         | 0.92978  | 0.999883 |
| gene1464 | gene1464 | SACOL1495 | gi 57650036 ref NC_002951.2 :1534588-1537282 | MVR | MR150 | OK     | 26.1438 | 32.4296 | 0.310843     | -0.391973         | 0.69508  | 0.999883 |
| gene1465 | gene1465 | birA      | gi 57650036 ref NC_002951.2 :1537305-1539466 | MVR | MR150 | OK     | 30.6457 | 39.4724 | 0.365157     | -0.331177         | 0.74051  | 0.999883 |
| gene1466 | gene1466 | papS      | gi 57650036 ref NC_002951.2 :1537305-1539466 | MVR | MR150 | OK     | 26.8815 | 29.6215 | 0.140034     | -0.130521         | 0.89615  | 0.999883 |
| gene1467 | gene1467 | SACOL1498 | gi 57650036 ref NC_002951.2 :1539470-1540625 | MVR | MR150 | OK     | 26.8223 | 31.9116 | 0.250649     | -0.349787         | 0.7265   | 0.999883 |
| gene1468 | gene1468 | SACOL1499 | gi 57650036 ref NC_002951.2 :1540853-1541171 | MVR | MR150 | OK     | 53.9512 | 32.0578 | -0.750979    | 1.08495           | 0.27794  | 0.963271 |
| gene1469 | gene1469 | SACOL1500 | gi 57650036 ref NC_002951.2 :1541507-1542215 | MVR | MR150 | OK     | 1473.11 | 1544.46 | 0.0682398    | -0.069764         | 0.94438  | 0.999883 |
| gene147  | gene147  | SACOL0153 | gi 57650036 ref NC_002951.2 :170370-170754   | MVR | MR150 | OK     | 2.84558 | 3.29641 | 0.212172     | -0.215793         | 0.82915  | 0.999883 |
| gene1470 | gene1470 | SACOL1501 | gi 57650036 ref NC_002951.2 :1542259-1543412 | MVR | MR150 | OK     | 16.3769 | 13.4119 | -0.288153    | 0.275961          | 0.78258  | 0.999883 |
| gene1471 | gene1471 | SACOL1502 | gi 57650036 ref NC_002951.2 :1542259-1543412 | MVR | MR150 | OK     | 20.5857 | 19.9449 | -0.045624    | 0.050291          | 0.95989  | 0.999883 |

|          |          |           |                                              |     |       |        |         |         |             |             |         |          |
|----------|----------|-----------|----------------------------------------------|-----|-------|--------|---------|---------|-------------|-------------|---------|----------|
| gene1472 | gene1472 | SACOL1503 | gi 57650036 ref NC_002951.2 :1543425-1544670 | MVR | MR150 | OK     | 28.64   | 25.94   | -0.142851   | 0.199024    | 0.84224 | 0.999883 |
| gene1473 | gene1473 | aroA      | gi 57650036 ref NC_002951.2 :1544676-1545975 | MVR | MR150 | OK     | 26.44   | 26.1988 | -0.013224   | 0.018396    | 0.98532 | 0.999883 |
| gene1474 | gene1474 | aroB      | gi 57650036 ref NC_002951.2 :1545984-1547049 | MVR | MR150 | OK     | 18.0793 | 15.7563 | -0.198406   | 0.289044    | 0.77255 | 0.999883 |
| gene1475 | gene1475 | aroC      | gi 57650036 ref NC_002951.2 :1547074-1548241 | MVR | MR150 | OK     | 16.1863 | 22.647  | 0.484545    | -0.697295   | 0.48562 | 0.999883 |
| gene1476 | gene1476 | SACOL1507 | gi 57650036 ref NC_002951.2 :1548626-1548827 | MVR | MR150 | NOTEST | 0       | 0       | 0           | 0           | 1       | 1        |
| gene1477 | gene1477 | SACOL1508 | gi 57650036 ref NC_002951.2 :1548855-1548981 | MVR | MR150 | NOTEST | 0       | 0       | 0           | 0           | 1       | 1        |
| gene1478 | gene1478 | ndk       | gi 57650036 ref NC_002951.2 :1549035-1549485 | MVR | MR150 | OK     | 187.225 | 259.126 | 0.468879    | -0.611866   | 0.54063 | 0.999883 |
| gene1479 | gene1479 | SACOL1510 | gi 57650036 ref NC_002951.2 :1549576-1550536 | MVR | MR150 | OK     | 58.7151 | 70.9224 | 0.27251     | -0.359112   | 0.71951 | 0.999883 |
| gene148  | gene148  | aldA1     | gi 57650036 ref NC_002951.2 :171180-172668   | MVR | MR150 | OK     | 1009.67 | 1141.56 | 0.177125    | -0.182224   | 0.85541 | 0.999883 |
| gene1480 | gene1480 | ubiE      | gi 57650036 ref NC_002951.2 :1550537-1551263 | MVR | MR150 | OK     | 114.72  | 129.81  | 0.178279    | -0.228531   | 0.81923 | 0.999883 |
| gene1481 | gene1481 | SACOL1512 | gi 57650036 ref NC_002951.2 :1551265-1551838 | MVR | MR150 | OK     | 72.6671 | 93.9605 | 0.370751    | -0.51314    | 0.60785 | 0.999883 |
| gene1482 | gene1482 | hup       | gi 57650036 ref NC_002951.2 :1552268-1552541 | MVR | MR150 | OK     | 8177.93 | 6953.02 | -0.234095   | 0.240625    | 0.80985 | 0.999883 |
| gene1483 | gene1483 | gpsA      | gi 57650036 ref NC_002951.2 :1552711-1553710 | MVR | MR150 | OK     | 89.1127 | 88.9275 | -0.0030008  | 0.003799    | 0.99697 | 0.999883 |
| gene1484 | gene1484 | engA      | gi 57650036 ref NC_002951.2 :1553726-1555037 | MVR | MR150 | OK     | 78.9289 | 69.201  | -0.189761   | 0.236043    | 0.8134  | 0.999883 |
| gene1485 | gene1485 | rpsA      | gi 57650036 ref NC_002951.2 :1555258-1556434 | MVR | MR150 | OK     | 343.518 | 375.644 | 0.128979    | -0.137239   | 0.89084 | 0.999883 |
| gene1486 | gene1486 | cmk       | gi 57650036 ref NC_002951.2 :1557145-1557805 | MVR | MR150 | OK     | 57.5222 | 68.5525 | 0.253088    | -0.352475   | 0.72448 | 0.999883 |
| gene1487 | gene1487 | ansA      | gi 57650036 ref NC_002951.2 :1557881-1558850 | MVR | MR150 | OK     | 14.2072 | 16.1293 | 0.183066    | -0.268413   | 0.78838 | 0.999883 |
| gene1488 | gene1488 | SACOL1520 | gi 57650036 ref NC_002951.2 :1558964-1559951 | MVR | MR150 | OK     | 51.5031 | 51.9515 | 0.0125062   | -0.016795   | 0.9866  | 0.999883 |
| gene1489 | gene1489 | SACOL1521 | gi 57650036 ref NC_002951.2 :1560111-1560228 | MVR | MR150 | NOTEST | 0       | 0       | 0           | 0           | 1       | 1        |
| gene149  | gene149  | SACOL0155 | gi 57650036 ref NC_002951.2 :173313-174273   | MVR | MR150 | OK     | 23.9945 | 23.1707 | -0.0504057  | 0.072803    | 0.94196 | 0.999883 |
| gene1490 | gene1490 | SACOL1522 | gi 57650036 ref NC_002951.2 :1560352-1561813 | MVR | MR150 | OK     | 233.186 | 236.843 | 0.0224484   | -0.024263   | 0.98064 | 0.999883 |
| gene1491 | gene1491 | recQ2     | gi 57650036 ref NC_002951.2 :1561965-1564288 | MVR | MR150 | OK     | 15.4812 | 16.3538 | 0.0791092   | -0.07591    | 0.93949 | 0.999883 |
| gene1492 | gene1492 | SACOL1524 | gi 57650036 ref NC_002951.2 :1561965-1564288 | MVR | MR150 | OK     | 23.711  | 25.9951 | 0.13268     | -0.126777   | 0.89912 | 0.999883 |
| gene1493 | gene1493 | fer       | gi 57650036 ref NC_002951.2 :1564395-1564644 | MVR | MR150 | OK     | 240.67  | 240.136 | -0.003201   | 0.004659    | 0.99628 | 0.999883 |
| gene1494 | gene1494 | SACOL1526 | gi 57650036 ref NC_002951.2 :1564749-1565295 | MVR | MR150 | OK     | 78.0052 | 112.336 | 0.526181    | -0.724427   | 0.4688  | 0.999883 |
| gene1495 | gene1495 | SACOL1528 | gi 57650036 ref NC_002951.2 :1565891-1566806 | MVR | MR150 | OK     | 2.53873 | 2.35574 | -0.107924   | 0.140844    | 0.88799 | 0.999883 |
| gene1496 | gene1496 | SACOL1529 | gi 57650036 ref NC_002951.2 :1566820-1567898 | MVR | MR150 | OK     | 0       | 4.33328 | 1.79769e+30 | 1.79769e+30 | 0.14005 | 0.736107 |
| gene1497 | gene1497 | SACOL1530 | gi 57650036 ref NC_002951.2 :1566820-1567898 | MVR | MR150 | NOTEST | 0.62491 | 0.45101 | -0.470488   | 0.382072    | 0.70241 | 1        |
| gene1498 | gene1498 | SACOL1531 | gi 57650036 ref NC_002951.2 :1568015-1568933 | MVR | MR150 | OK     | 1.26388 | 0.21326 | -2.56715    | 1.94566     | 0.0517  | 0.447556 |
| gene1499 | gene1499 | SACOL1532 | gi 57650036 ref NC_002951.2 :1569023-1572048 | MVR | MR150 | OK     | 19.0946 | 19.1956 | 0.0076141   | -0.008502   | 0.99322 | 0.999883 |
| gene15   | gene15   | dnaB      | gi 57650036 ref NC_002951.2 :20786-22187     | MVR | MR150 | OK     | 78.7583 | 86.461  | 0.134617    | -0.163662   | 0.87    | 0.999883 |
| gene150  | gene150  | SACOL0156 | gi 57650036 ref NC_002951.2 :174334-174538   | MVR | MR150 | OK     | 60.0788 | 50.5897 | -0.248011   | 0.322835    | 0.74682 | 0.999883 |
| gene1500 | gene1500 | SACOL1533 | gi 57650036 ref NC_002951.2 :1569023-1572048 | MVR | MR150 | OK     | 20.2757 | 22.3963 | 0.143509    | -0.098161   | 0.92181 | 0.999883 |

|          |          |           |                                              |     |       |        |         |         |            |           |         |          |
|----------|----------|-----------|----------------------------------------------|-----|-------|--------|---------|---------|------------|-----------|---------|----------|
| gene1501 | gene1501 | srrB      | gi 57650036 ref NC_002951.2 :1572352-1574810 | MVR | MR150 | OK     | 24.2297 | 23.1921 | -0.0631387 | 0.044893  | 0.96419 | 0.999883 |
| gene1502 | gene1502 | srrA      | gi 57650036 ref NC_002951.2 :1572352-1574810 | MVR | MR150 | OK     | 135.801 | 130.683 | -0.0554216 | 0.053975  | 0.95696 | 0.999883 |
| gene1503 | gene1503 | rluB      | gi 57650036 ref NC_002951.2 :1574942-1576939 | MVR | MR150 | OK     | 44.7036 | 49.7991 | 0.155727   | -0.129174 | 0.89722 | 0.999883 |
| gene1504 | gene1504 | scpB      | gi 57650036 ref NC_002951.2 :1574942-1576939 | MVR | MR150 | OK     | 40.8321 | 40.5978 | -0.0083034 | 0.005076  | 0.99595 | 0.999883 |
| gene1505 | gene1505 | scpA      | gi 57650036 ref NC_002951.2 :1574942-1576939 | MVR | MR150 | OK     | 41.5484 | 41.4393 | -0.0037911 | 0.002932  | 0.99766 | 0.999883 |
| gene1506 | gene1506 | SACOL1539 | gi 57650036 ref NC_002951.2 :1577030-1577537 | MVR | MR150 | OK     | 8.2479  | 13.9523 | 0.75841    | -1.05996  | 0.28916 | 0.975616 |
| gene1507 | gene1507 | xerD      | gi 57650036 ref NC_002951.2 :1577614-1578502 | MVR | MR150 | OK     | 21.3114 | 21.3656 | 0.00365986 | -0.005332 | 0.99575 | 0.999883 |
| gene1508 | gene1508 | SACOL1541 | gi 57650036 ref NC_002951.2 :1578550-1579000 | MVR | MR150 | OK     | 120.616 | 89.8384 | -0.425019  | 0.598917  | 0.54923 | 0.999883 |
| gene1509 | gene1509 | SACOL1542 | gi 57650036 ref NC_002951.2 :1579104-1579647 | MVR | MR150 | OK     | 24.3528 | 17.399  | -0.485078  | 0.710726  | 0.47725 | 0.999883 |
| gene151  | gene151  | SACOL0157 | gi 57650036 ref NC_002951.2 :174716-175229   | MVR | MR150 | OK     | 21.6096 | 17.1072 | -0.337069  | 0.491728  | 0.62291 | 0.999883 |
| gene1510 | gene1510 | SACOL1543 | gi 57650036 ref NC_002951.2 :1579728-1580637 | MVR | MR150 | OK     | 74.8652 | 74.0776 | -0.0152588 | 0.019967  | 0.98407 | 0.999883 |
| gene1511 | gene1511 | SACOL1544 | gi 57650036 ref NC_002951.2 :1580852-1581101 | MVR | MR150 | OK     | 10.3737 | 6.927   | -0.582625  | 0.587648  | 0.55677 | 0.999883 |
| gene1512 | gene1512 | SACOL1545 | gi 57650036 ref NC_002951.2 :1581116-1581872 | MVR | MR150 | OK     | 9.01204 | 8.53615 | -0.0782686 | 0.113223  | 0.90985 | 0.999883 |
| gene1513 | gene1513 | proC      | gi 57650036 ref NC_002951.2 :1582013-1582829 | MVR | MR150 | OK     | 94.621  | 91.4684 | -0.0488873 | 0.063445  | 0.94941 | 0.999883 |
| gene1514 | gene1514 | SACOL1548 | gi 57650036 ref NC_002951.2 :1582933-1583854 | MVR | MR150 | OK     | 21.3096 | 26.3347 | 0.305465   | -0.441983 | 0.6585  | 0.999883 |
| gene1515 | gene1515 | zwf       | gi 57650036 ref NC_002951.2 :1584166-1585651 | MVR | MR150 | OK     | 100.692 | 110.37  | 0.132396   | -0.155111 | 0.87673 | 0.999883 |
| gene1516 | gene1516 | SACOL1550 | gi 57650036 ref NC_002951.2 :1585853-1586747 | MVR | MR150 | OK     | 41.3686 | 45.0095 | 0.121695   | -0.168787 | 0.86596 | 0.999883 |
| gene1517 | gene1517 | malA      | gi 57650036 ref NC_002951.2 :1586829-1588479 | MVR | MR150 | OK     | 15.7497 | 14.8939 | -0.0806062 | 0.114801  | 0.9086  | 0.999883 |
| gene1518 | gene1518 | malR      | gi 57650036 ref NC_002951.2 :1588494-1589514 | MVR | MR150 | OK     | 4.26099 | 4.85545 | 0.188418   | -0.267896 | 0.78878 | 0.999883 |
| gene1519 | gene1519 | SACOL1553 | gi 57650036 ref NC_002951.2 :1589707-1590079 | MVR | MR150 | OK     | 560.973 | 615.879 | 0.134716   | -0.164167 | 0.8696  | 0.999883 |
| gene152  | gene152  | SACOL0158 | gi 57650036 ref NC_002951.2 :175570-178057   | MVR | MR150 | OK     | 4.11941 | 1.80313 | -1.19193   | 1.5232    | 0.12771 | 0.708224 |
| gene1520 | gene1520 | gnd       | gi 57650036 ref NC_002951.2 :1590297-1591704 | MVR | MR150 | OK     | 244.816 | 301.11  | 0.29859    | -0.319661 | 0.74923 | 0.999883 |
| gene1521 | gene1521 | SACOL1555 | gi 57650036 ref NC_002951.2 :1591771-1592905 | MVR | MR150 | OK     | 43.5072 | 58.535  | 0.428046   | -0.566141 | 0.5713  | 0.999883 |
| gene1522 | gene1522 | SACOL1556 | gi 57650036 ref NC_002951.2 :1593167-1593347 | MVR | MR150 | NOTEST | 0       | 0       | 0          | 0         | 1       | 1        |
| gene1523 | gene1523 | SACOL1557 | gi 57650036 ref NC_002951.2 :1593473-1594454 | MVR | MR150 | OK     | 60.0996 | 67.8399 | 0.17478    | -0.229946 | 0.81813 | 0.999883 |
| gene1524 | gene1524 | SACOL1558 | gi 57650036 ref NC_002951.2 :1594467-1594905 | MVR | MR150 | OK     | 52.3292 | 61.5926 | 0.235141   | -0.343633 | 0.73112 | 0.999883 |
| gene1525 | gene1525 | SACOL1559 | gi 57650036 ref NC_002951.2 :1594977-1595076 | MVR | MR150 | NOTEST | 0       | 0       | 0          | 0         | 1       | 1        |
| gene1526 | gene1526 | SACOL1560 | gi 57650036 ref NC_002951.2 :1595255-1596530 | MVR | MR150 | OK     | 72.5059 | 93.7422 | 0.3706     | -0.45664  | 0.64793 | 0.999883 |
| gene1527 | gene1527 | SACOL1561 | gi 57650036 ref NC_002951.2 :1596542-1598518 | MVR | MR150 | OK     | 58.0158 | 62.1115 | 0.0984157  | -0.085011 | 0.93225 | 0.999883 |
| gene1528 | gene1528 | SACOL1562 | gi 57650036 ref NC_002951.2 :1596542-1598518 | MVR | MR150 | OK     | 56.6526 | 62.9517 | 0.152104   | -0.131826 | 0.89512 | 0.999883 |
| gene1529 | gene1529 | lpdA      | gi 57650036 ref NC_002951.2 :1598533-1599955 | MVR | MR150 | OK     | 47.745  | 52.8905 | 0.147659   | -0.189966 | 0.84934 | 0.999883 |
| gene153  | gene153  | SACOL0159 | gi 57650036 ref NC_002951.2 :175570-178057   | MVR | MR150 | OK     | 3.04298 | 1.36211 | -1.15964   | 0.767036  | 0.44306 | 0.999883 |
| gene1530 | gene1530 | recN      | gi 57650036 ref NC_002951.2 :1600105-1601785 | MVR | MR150 | OK     | 65.919  | 72.3394 | 0.134088   | -0.162378 | 0.87101 | 0.999883 |

|          |          |           |                                              |     |       |        |         |         |              |              |         |          |
|----------|----------|-----------|----------------------------------------------|-----|-------|--------|---------|---------|--------------|--------------|---------|----------|
| gene1531 | gene1531 | argR      | gi 57650036 ref NC_002951.2 :1601800-1602253 | MVR | MR150 | OK     | 87.0869 | 96.0311 | 0.141046     | -0.20071     | 0.84093 | 0.999883 |
| gene1532 | gene1532 | ispA      | gi 57650036 ref NC_002951.2 :1602684-1605104 | MVR | MR150 | OK     | 69.1381 | 75.6616 | 0.130079     | -0.102003    | 0.91876 | 0.999883 |
| gene1533 | gene1533 | xseB      | gi 57650036 ref NC_002951.2 :1602684-1605104 | MVR | MR150 | OK     | 69.6277 | 81.6062 | 0.229017     | -0.049127    | 0.96082 | 0.999883 |
| gene1534 | gene1534 | xseA      | gi 57650036 ref NC_002951.2 :1602684-1605104 | MVR | MR150 | OK     | 52.7617 | 54.7745 | 0.0540123    | -0.047325    | 0.96225 | 0.999883 |
| gene1535 | gene1535 | nusB      | gi 57650036 ref NC_002951.2 :1605120-1605510 | MVR | MR150 | OK     | 56.0861 | 74.3227 | 0.406158     | -0.594553    | 0.55214 | 0.999883 |
| gene1536 | gene1536 | SACOL1570 | gi 57650036 ref NC_002951.2 :1605569-1605932 | MVR | MR150 | OK     | 66.7788 | 68.3762 | 0.0341041    | -0.050081    | 0.96006 | 0.999883 |
| gene1537 | gene1537 | accC      | gi 57650036 ref NC_002951.2 :1605946-1607766 | MVR | MR150 | OK     | 51.148  | 46.6351 | -0.13326     | 0.149747     | 0.88096 | 0.999883 |
| gene1538 | gene1538 | accB      | gi 57650036 ref NC_002951.2 :1605946-1607766 | MVR | MR150 | OK     | 54.1053 | 62.2989 | 0.203436     | -0.11694     | 0.90691 | 0.999883 |
| gene1539 | gene1539 | SACOL1573 | gi 57650036 ref NC_002951.2 :1608120-1609141 | MVR | MR150 | OK     | 48.2795 | 47.3763 | -0.0272468   | 0.036728     | 0.9707  | 0.999883 |
| gene154  | gene154  | SACOL0160 | gi 57650036 ref NC_002951.2 :178069-179101   | MVR | MR150 | OK     | 2.75023 | 2.39273 | -0.200899    | 0.269698     | 0.78739 | 0.999883 |
| gene1540 | gene1540 | SACOL1574 | gi 57650036 ref NC_002951.2 :1609249-1609591 | MVR | MR150 | OK     | 0       | 5.24298 | 1.79769e+30  | 1.79769e+30  | 0.01149 | 0.182325 |
| gene1541 | gene1541 | SACOL1575 | gi 57650036 ref NC_002951.2 :1609646-1610237 | MVR | MR150 | OK     | 1.91099 | 1.56578 | -0.287443    | 0.308429     | 0.75776 | 0.999883 |
| gene1542 | gene1542 | SACOL1576 | gi 57650036 ref NC_002951.2 :1610243-1613127 | MVR | MR150 | OK     | 2.77118 | 2.35037 | -0.237613    | 0.189067     | 0.85004 | 0.999883 |
| gene1543 | gene1543 | SACOL1577 | gi 57650036 ref NC_002951.2 :1610243-1613127 | MVR | MR150 | OK     | 3.60152 | 2.69533 | -0.418145    | 0.514625     | 0.60682 | 0.999883 |
| gene1544 | gene1544 | SACOL1578 | gi 57650036 ref NC_002951.2 :1613131-1614490 | MVR | MR150 | OK     | 1.49432 | 0.79286 | -0.914346    | 1.12091      | 0.26233 | 0.944538 |
| gene1545 | gene1545 | SACOL1579 | gi 57650036 ref NC_002951.2 :1614543-1617039 | MVR | MR150 | OK     | 3.19232 | 1.06745 | -1.58044     | 2.23713      | 0.02528 | 0.302373 |
| gene1546 | gene1546 | SACOL1580 | gi 57650036 ref NC_002951.2 :1617073-1617457 | MVR | MR150 | OK     | 1.77849 | 0.8241  | -1.10976     | 0.77016      | 0.44121 | 0.999883 |
| gene1547 | gene1547 | SACOL1581 | gi 57650036 ref NC_002951.2 :1617468-1617729 | MVR | MR150 | OK     | 20.8076 | 2.01969 | -3.36491     | 2.59539      | 0.00945 | 0.161634 |
| gene1548 | gene1548 | SACOL1582 | gi 57650036 ref NC_002951.2 :1617733-1618789 | MVR | MR150 | OK     | 2.8115  | 1.96788 | -0.514703    | 0.684487     | 0.49367 | 0.999883 |
| gene1549 | gene1549 | SACOL1583 | gi 57650036 ref NC_002951.2 :1618849-1619941 | MVR | MR150 | OK     | 5.18775 | 3.26193 | -0.669381    | 0.948588     | 0.34283 | 0.999883 |
| gene155  | gene155  | SACOL0161 | gi 57650036 ref NC_002951.2 :179317-179677   | MVR | MR150 | OK     | 449.545 | 676.887 | 0.590448     | -0.730338    | 0.46518 | 0.999883 |
| gene1550 | gene1550 | SACOL1584 | gi 57650036 ref NC_002951.2 :1620115-1620418 | MVR | MR150 | OK     | 3.67309 | 1.38047 | -1.41184     | 1.00473      | 0.31503 | 0.998619 |
| gene1551 | gene1551 | SACOL1585 | gi 57650036 ref NC_002951.2 :1620431-1620752 | MVR | MR150 | OK     | 10.6605 | 7.24133 | -0.557947    | 0.664045     | 0.50666 | 0.999883 |
| gene1552 | gene1552 | SACOL1586 | gi 57650036 ref NC_002951.2 :1620902-1621187 | MVR | MR150 | NOTEST | 0.71369 | 0       | -1.79769e+30 | -1.79769e+30 | 0.22252 | 1        |
| gene1553 | gene1553 | efp       | gi 57650036 ref NC_002951.2 :1621581-1622139 | MVR | MR150 | OK     | 294.046 | 300.085 | 0.0293283    | -0.035455    | 0.97172 | 0.999883 |
| gene1554 | gene1554 | SACOL1588 | gi 57650036 ref NC_002951.2 :1622164-1623226 | MVR | MR150 | OK     | 56.4556 | 57.0266 | 0.0145181    | -0.019137    | 0.98473 | 0.999883 |
| gene1555 | gene1555 | SACOL1589 | gi 57650036 ref NC_002951.2 :1623330-1623912 | MVR | MR150 | OK     | 24.3229 | 22.8373 | -0.0909213   | 0.133708     | 0.89363 | 0.999883 |
| gene1556 | gene1556 | SACOL1590 | gi 57650036 ref NC_002951.2 :1623925-1624144 | MVR | MR150 | OK     | 93.1691 | 111.972 | 0.265221     | -0.37969     | 0.70418 | 0.999883 |
| gene1557 | gene1557 | SACOL1591 | gi 57650036 ref NC_002951.2 :1624207-1625038 | MVR | MR150 | OK     | 53.0776 | 57.5081 | 0.115662     | -0.157947    | 0.8745  | 0.999883 |
| gene1558 | gene1558 | SACOL1592 | gi 57650036 ref NC_002951.2 :1625195-1625582 | MVR | MR150 | OK     | 92.6991 | 116.85  | 0.33403      | -0.48041     | 0.63094 | 0.999883 |
| gene1559 | gene1559 | SACOL1593 | gi 57650036 ref NC_002951.2 :1625946-1628758 | MVR | MR150 | OK     | 32.4036 | 44.5159 | 0.458165     | -0.400922    | 0.68848 | 0.999883 |
| gene156  | gene156  | SACOL0162 | gi 57650036 ref NC_002951.2 :179849-180875   | MVR | MR150 | OK     | 4.44787 | 4.26402 | -0.0608992   | 0.086372     | 0.93117 | 0.999883 |
| gene1560 | gene1560 | SACOL1594 | gi 57650036 ref NC_002951.2 :1625946-1628758 | MVR | MR150 | OK     | 32.1846 | 49.6714 | 0.626048     | -0.534014    | 0.59333 | 0.999883 |

|          |          |           |                                              |     |       |        |         |         |                               |           |         |          |
|----------|----------|-----------|----------------------------------------------|-----|-------|--------|---------|---------|-------------------------------|-----------|---------|----------|
| gene1561 | gene1561 | gcvT      | gi 57650036 ref NC_002951.2 :1628777-1629869 | MVR | MR150 | OK     | 20.3467 | 27.984  | 0.459802                      | -0.655884 | 0.5119  | 0.999883 |
| gene1562 | gene1562 | aroK      | gi 57650036 ref NC_002951.2 :1630027-1630552 | MVR | MR150 | OK     | 27.7385 | 33.8961 | 0.28923                       | -0.424888 | 0.67092 | 0.999883 |
| gene1563 | gene1563 | SACOL1597 | gi 57650036 ref NC_002951.2 :1630784-1631282 | MVR | MR150 | OK     | 0.42579 | 2.05318 | 2.26965                       | -1.51879  | 0.12882 | 0.710909 |
| gene1564 | gene1564 | SACOL1598 | gi 57650036 ref NC_002951.2 :1631485-1632221 | MVR | MR150 | NOTEST | 0.26054 | 0       | -1.79769e+3(-1.79769e+0.27986 |           | 1       |          |
| gene1565 | gene1565 | comGC     | gi 57650036 ref NC_002951.2 :1631485-1632221 | MVR | MR150 | NOTEST | 0.57026 | 0       | -1.79769e+3(-1.79769e+0.27986 |           | 1       |          |
| gene1566 | gene1566 | SACOL1600 | gi 57650036 ref NC_002951.2 :1632234-1634251 | MVR | MR150 | OK     | 1.86417 | 0.87909 | -1.08445                      | 0.903139  | 0.36645 | 0.999883 |
| gene1567 | gene1567 | SACOL1601 | gi 57650036 ref NC_002951.2 :1632234-1634251 | MVR | MR150 | OK     | 1.79091 | 2.56862 | 0.5203                        | -0.539252 | 0.58971 | 0.999883 |
| gene1568 | gene1568 | SACOL1602 | gi 57650036 ref NC_002951.2 :1634302-1637882 | MVR | MR150 | OK     | 68.2459 | 72.9237 | 0.0956462                     | -0.054418 | 0.9566  | 0.999883 |
| gene1569 | gene1569 | SACOL1603 | gi 57650036 ref NC_002951.2 :1634302-1637882 | MVR | MR150 | OK     | 57.964  | 52.1722 | -0.151875                     | 0.042124  | 0.9664  | 0.999883 |
| gene157  | gene157  | SACOL0163 | gi 57650036 ref NC_002951.2 :181260-182511   | MVR | MR150 | OK     | 24.6004 | 33.0779 | 0.427183                      | -0.591646 | 0.55409 | 0.999883 |
| gene1570 | gene1570 | glk       | gi 57650036 ref NC_002951.2 :1634302-1637882 | MVR | MR150 | OK     | 50.1236 | 54.6756 | 0.125407                      | -0.084296 | 0.93282 | 0.999883 |
| gene1571 | gene1571 | SACOL1605 | gi 57650036 ref NC_002951.2 :1634302-1637882 | MVR | MR150 | OK     | 10.3584 | 18.3963 | 0.82861                       | -0.055514 | 0.95573 | 0.999883 |
| gene1572 | gene1572 | SACOL1606 | gi 57650036 ref NC_002951.2 :1634302-1637882 | MVR | MR150 | OK     | 37.7798 | 39.2589 | 0.0554054                     | -0.04059  | 0.96762 | 0.999883 |
| gene1573 | gene1573 | SACOL1607 | gi 57650036 ref NC_002951.2 :1637893-1638433 | MVR | MR150 | OK     | 41.2173 | 45.4558 | 0.141212                      | -0.20579  | 0.83696 | 0.999883 |
| gene1574 | gene1574 | rpmG      | gi 57650036 ref NC_002951.2 :1638641-1638791 | MVR | MR150 | OK     | 2264.82 | 2056.82 | -0.138977                     | 0.20358   | 0.83868 | 0.999883 |
| gene1575 | gene1575 | pbp3      | gi 57650036 ref NC_002951.2 :1638903-1640979 | MVR | MR150 | OK     | 87.0716 | 106.062 | 0.284632                      | -0.323151 | 0.74658 | 0.999883 |
| gene1576 | gene1576 | sodA2     | gi 57650036 ref NC_002951.2 :1641099-1641699 | MVR | MR150 | OK     | 128.244 | 153.441 | 0.2588                        | -0.336797 | 0.73627 | 0.999883 |
| gene1577 | gene1577 | SACOL1611 | gi 57650036 ref NC_002951.2 :1641974-1643235 | MVR | MR150 | OK     | 26.2032 | 33.9359 | 0.373072                      | -0.337336 | 0.73586 | 0.999883 |
| gene1578 | gene1578 | SACOL1612 | gi 57650036 ref NC_002951.2 :1641974-1643235 | MVR | MR150 | OK     | 14.3443 | 14.2971 | -0.0047561                    | 0.005378  | 0.99571 | 0.999883 |
| gene1579 | gene1579 | SACOL1613 | gi 57650036 ref NC_002951.2 :1643276-1644062 | MVR | MR150 | OK     | 21.0159 | 22.9919 | 0.129646                      | -0.189663 | 0.84957 | 0.999883 |
| gene158  | gene158  | SACOL0164 | gi 57650036 ref NC_002951.2 :182957-190133   | MVR | MR150 | OK     | 20.8002 | 24.4419 | 0.232764                      | -0.267995 | 0.7887  | 0.999883 |
| gene1580 | gene1580 | nfo       | gi 57650036 ref NC_002951.2 :1644187-1645078 | MVR | MR150 | OK     | 73.7287 | 75.1198 | 0.0269672                     | -0.035384 | 0.97177 | 0.999883 |
| gene1581 | gene1581 | SACOL1615 | gi 57650036 ref NC_002951.2 :1645087-1646434 | MVR | MR150 | OK     | 52.5473 | 54.2113 | 0.0449774                     | -0.057895 | 0.95383 | 0.999883 |
| gene1582 | gene1582 | SACOL1616 | gi 57650036 ref NC_002951.2 :1646547-1647648 | MVR | MR150 | OK     | 43.1433 | 47.5906 | 0.141539                      | -0.189989 | 0.84932 | 0.999883 |
| gene1583 | gene1583 | SACOL1617 | gi 57650036 ref NC_002951.2 :1647650-1648328 | MVR | MR150 | OK     | 22.0202 | 25.6206 | 0.218479                      | -0.320503 | 0.74859 | 0.999883 |
| gene1584 | gene1584 | rpoD      | gi 57650036 ref NC_002951.2 :1648458-1649565 | MVR | MR150 | OK     | 101.728 | 105.189 | 0.0482661                     | -0.059096 | 0.95288 | 0.999883 |
| gene1585 | gene1585 | dnaG      | gi 57650036 ref NC_002951.2 :1649788-1651588 | MVR | MR150 | OK     | 74.1867 | 83.8594 | 0.176813                      | -0.208796 | 0.83461 | 0.999883 |
| gene1586 | gene1586 | SACOL1620 | gi 57650036 ref NC_002951.2 :1651648-1652467 | MVR | MR150 | OK     | 48.9392 | 48.4809 | -0.0135751                    | 0.018822  | 0.98498 | 0.999883 |
| gene1587 | gene1587 | SACOL1621 | gi 57650036 ref NC_002951.2 :1652477-1653017 | MVR | MR150 | OK     | 16.6348 | 17.1022 | 0.0399752                     | -0.058224 | 0.95357 | 0.999883 |
| gene1588 | gene1588 | glyS      | gi 57650036 ref NC_002951.2 :1653435-1654827 | MVR | MR150 | OK     | 394.572 | 233.331 | -0.757912                     | 0.805557  | 0.4205  | 0.999883 |
| gene1589 | gene1589 | SACOL1623 | gi 57650036 ref NC_002951.2 :1654976-1655729 | MVR | MR150 | OK     | 79.9102 | 102.159 | 0.354358                      | -0.466283 | 0.64101 | 0.999883 |
| gene159  | gene159  | SACOL0165 | gi 57650036 ref NC_002951.2 :190145-190790   | MVR | MR150 | OK     | 36.6582 | 50.2221 | 0.454186                      | -0.652911 | 0.51381 | 0.999883 |
| gene1590 | gene1590 | era       | gi 57650036 ref NC_002951.2 :1655750-1656650 | MVR | MR150 | OK     | 62.6269 | 75.0295 | 0.260676                      | -0.344342 | 0.73059 | 0.999883 |

|          |          |           |                                              |     |       |        |         |         |            |           |         |          |
|----------|----------|-----------|----------------------------------------------|-----|-------|--------|---------|---------|------------|-----------|---------|----------|
| gene1591 | gene1591 | cdd       | gi 57650036 ref NC_002951.2 :1656650-1657055 | MVR | MR150 | OK     | 38.1365 | 61.6357 | 0.692595   | -1.01468  | 0.31026 | 0.993597 |
| gene1592 | gene1592 | dgkA      | gi 57650036 ref NC_002951.2 :1657065-1657410 | MVR | MR150 | OK     | 53.2327 | 71.0001 | 0.415509   | -0.609826 | 0.54198 | 0.999883 |
| gene1593 | gene1593 | SACOL1627 | gi 57650036 ref NC_002951.2 :1657412-1657880 | MVR | MR150 | OK     | 86.862  | 90.6984 | 0.0623529  | -0.088548 | 0.92944 | 0.999883 |
| gene1594 | gene1594 | SACOL1628 | gi 57650036 ref NC_002951.2 :1657880-1658801 | MVR | MR150 | OK     | 56.7137 | 65.1997 | 0.201169   | -0.268161 | 0.78858 | 0.999883 |
| gene1595 | gene1595 | SACOL1629 | gi 57650036 ref NC_002951.2 :1659131-1659830 | MVR | MR150 | OK     | 365.435 | 333.787 | -0.130687  | 0.149176  | 0.88141 | 0.999883 |
| gene1596 | gene1596 | SACOL1630 | gi 57650036 ref NC_002951.2 :1659846-1660836 | MVR | MR150 | OK     | 277.043 | 281.257 | 0.0217761  | -0.02424  | 0.98066 | 0.999883 |
| gene1597 | gene1597 | SACOL1631 | gi 57650036 ref NC_002951.2 :1660853-1661561 | MVR | MR150 | OK     | 270.946 | 292.921 | 0.112504   | -0.131204 | 0.89561 | 0.999883 |
| gene1598 | gene1598 | rpsU      | gi 57650036 ref NC_002951.2 :1661780-1661957 | MVR | MR150 | OK     | 11432.7 | 9074.96 | -0.333204  | 0.382251  | 0.70228 | 0.999883 |
| gene1599 | gene1599 | SACOL1633 | gi 57650036 ref NC_002951.2 :1662249-1663596 | MVR | MR150 | OK     | 50.6204 | 57.95   | 0.195091   | -0.250661 | 0.80208 | 0.999883 |
| gene16   | gene16   | SACOL0017 | gi 57650036 ref NC_002951.2 :22262-22355     | MVR | MR150 | NOTEST | 0       | 0       | 0          | 0         | 1       | 1        |
| gene160  | gene160  | SACOL0166 | gi 57650036 ref NC_002951.2 :191117-191612   | MVR | MR150 | OK     | 49.7165 | 34.7391 | -0.517164  | 0.757479  | 0.44876 | 0.999883 |
| gene1600 | gene1600 | SACOL1634 | gi 57650036 ref NC_002951.2 :1663602-1664355 | MVR | MR150 | OK     | 34.042  | 42.6353 | 0.324733   | -0.464173 | 0.64252 | 0.999883 |
| gene1601 | gene1601 | prmA      | gi 57650036 ref NC_002951.2 :1664356-1665295 | MVR | MR150 | OK     | 80.2308 | 130.747 | 0.704554   | -0.884007 | 0.37669 | 0.999883 |
| gene1602 | gene1602 | dnaJ      | gi 57650036 ref NC_002951.2 :1665298-1666438 | MVR | MR150 | OK     | 54.7142 | 93.3518 | 0.770761   | -0.979539 | 0.32731 | 0.999883 |
| gene1603 | gene1603 | dnaK      | gi 57650036 ref NC_002951.2 :1666573-1668406 | MVR | MR150 | OK     | 449.442 | 964.784 | 1.10207    | -1.13384  | 0.25686 | 0.934592 |
| gene1604 | gene1604 | grpE      | gi 57650036 ref NC_002951.2 :1668474-1669101 | MVR | MR150 | OK     | 195.383 | 527.674 | 1.43334    | -1.68072  | 0.09282 | 0.611738 |
| gene1605 | gene1605 | hrcA      | gi 57650036 ref NC_002951.2 :1669132-1670110 | MVR | MR150 | OK     | 166.745 | 424.354 | 1.34762    | -1.50984  | 0.13108 | 0.718382 |
| gene1606 | gene1606 | SACOL1640 | gi 57650036 ref NC_002951.2 :1670209-1671367 | MVR | MR150 | OK     | 6.63707 | 4.31616 | -0.620799  | 0.899058  | 0.36862 | 0.999883 |
| gene1607 | gene1607 | lepA      | gi 57650036 ref NC_002951.2 :1671896-1673720 | MVR | MR150 | OK     | 28.0014 | 31.5014 | 0.169918   | -0.224131 | 0.82266 | 0.999883 |
| gene1608 | gene1608 | rpsT      | gi 57650036 ref NC_002951.2 :1674065-1674317 | MVR | MR150 | OK     | 900.018 | 887.499 | -0.0202087 | 0.0262    | 0.9791  | 0.999883 |
| gene1609 | gene1609 | holA      | gi 57650036 ref NC_002951.2 :1674361-1675336 | MVR | MR150 | OK     | 17.2862 | 16.3997 | -0.075954  | 0.111076  | 0.91156 | 0.999883 |
| gene161  | gene161  | argB      | gi 57650036 ref NC_002951.2 :191866-192631   | MVR | MR150 | OK     | 1.51306 | 1.62586 | 0.103734   | -0.118905 | 0.90535 | 0.999883 |
| gene1610 | gene1610 | SACOL1644 | gi 57650036 ref NC_002951.2 :1675392-1677540 | MVR | MR150 | OK     | 2.97923 | 4.32474 | 0.537673   | -0.787424 | 0.43103 | 0.999883 |
| gene1611 | gene1611 | SACOL1645 | gi 57650036 ref NC_002951.2 :1677598-1678030 | MVR | MR150 | OK     | 30.0952 | 40.7923 | 0.438763   | -0.643586 | 0.51984 | 0.999883 |
| gene1612 | gene1612 | comEA     | gi 57650036 ref NC_002951.2 :1678151-1678838 | MVR | MR150 | OK     | 5.93476 | 7.54424 | 0.346186   | -0.485889 | 0.62705 | 0.999883 |
| gene1613 | gene1613 | SACOL1647 | gi 57650036 ref NC_002951.2 :1678877-1679594 | MVR | MR150 | OK     | 91.1975 | 110.155 | 0.272473   | -0.357284 | 0.72088 | 0.999883 |
| gene1614 | gene1614 | SACOL1648 | gi 57650036 ref NC_002951.2 :1679596-1679950 | MVR | MR150 | OK     | 98.3024 | 97.3941 | -0.0133922 | 0.01951   | 0.98443 | 0.999883 |
| gene1615 | gene1615 | SACOL1649 | gi 57650036 ref NC_002951.2 :1679950-1681094 | MVR | MR150 | OK     | 47.1095 | 67.9788 | 0.529066   | -0.478012 | 0.63264 | 0.999883 |
| gene1616 | gene1616 | nadD      | gi 57650036 ref NC_002951.2 :1679950-1681094 | MVR | MR150 | OK     | 59.7842 | 77.3487 | 0.371612   | -0.36024  | 0.71867 | 0.999883 |
| gene1617 | gene1617 | SACOL1651 | gi 57650036 ref NC_002951.2 :1681096-1681387 | MVR | MR150 | OK     | 11.5057 | 22.8366 | 0.989003   | -1.24663  | 0.21253 | 0.892138 |
| gene1618 | gene1618 | aroE      | gi 57650036 ref NC_002951.2 :1681390-1682197 | MVR | MR150 | OK     | 37.5097 | 41.3671 | 0.14122    | -0.200065 | 0.84143 | 0.999883 |
| gene1619 | gene1619 | SACOL1653 | gi 57650036 ref NC_002951.2 :1682210-1683311 | MVR | MR150 | OK     | 29.6736 | 32.8035 | 0.144674   | -0.20184  | 0.84004 | 0.999883 |
| gene162  | gene162  | argJ      | gi 57650036 ref NC_002951.2 :192646-193888   | MVR | MR150 | OK     | 2.18305 | 1.46976 | -0.570769  | 0.750805  | 0.45277 | 0.999883 |



|          |          |           |                                              |     |       |    |         |         |            |           |         |          |
|----------|----------|-----------|----------------------------------------------|-----|-------|----|---------|---------|------------|-----------|---------|----------|
| gene1620 | gene1620 | SACOL1654 | gi 57650036 ref NC_002951.2 :1683311-1683839 | MVR | MR150 | OK | 39.5676 | 41.9835 | 0.0855044  | -0.125012 | 0.90051 | 0.999883 |
| gene1621 | gene1621 | mtn       | gi 57650036 ref NC_002951.2 :1683858-1684545 | MVR | MR150 | OK | 19.3195 | 26.0905 | 0.433464   | -0.635766 | 0.52493 | 0.999883 |
| gene1622 | gene1622 | SACOL1656 | gi 57650036 ref NC_002951.2 :1684858-1685128 | MVR | MR150 | OK | 15.6452 | 14.741  | -0.0858821 | 0.104808  | 0.91653 | 0.999883 |
| gene1623 | gene1623 | SACOL1657 | gi 57650036 ref NC_002951.2 :1685329-1686034 | MVR | MR150 | OK | 4.61887 | 2.72833 | -0.759523  | 0.989621  | 0.32236 | 0.999883 |
| gene1624 | gene1624 | SACOL1658 | gi 57650036 ref NC_002951.2 :1686495-1687716 | MVR | MR150 | OK | 9.56132 | 11.5498 | 0.272586   | -0.40014  | 0.68905 | 0.999883 |
| gene1625 | gene1625 | SACOL1659 | gi 57650036 ref NC_002951.2 :1688004-1689234 | MVR | MR150 | OK | 37.8451 | 36.5771 | -0.0491669 | 0.066425  | 0.94704 | 0.999883 |
| gene1626 | gene1626 | SACOL1660 | gi 57650036 ref NC_002951.2 :1689246-1691360 | MVR | MR150 | OK | 33.3788 | 26.301  | -0.343816  | 0.237181  | 0.81252 | 0.999883 |
| gene1627 | gene1627 | SACOL1661 | gi 57650036 ref NC_002951.2 :1689246-1691360 | MVR | MR150 | OK | 35.2551 | 35.0594 | -0.008031  | 0.008806  | 0.99297 | 0.999883 |
| gene1628 | gene1628 | SACOL1662 | gi 57650036 ref NC_002951.2 :1691373-1691823 | MVR | MR150 | OK | 19.5455 | 12.8341 | -0.606857  | 0.863803  | 0.3877  | 0.999883 |
| gene1629 | gene1629 | SACOL1663 | gi 57650036 ref NC_002951.2 :1691824-1693559 | MVR | MR150 | OK | 24.595  | 27.3788 | 0.154696   | -0.179852 | 0.85727 | 0.999883 |
| gene163  | gene163  | argC      | gi 57650036 ref NC_002951.2 :193899-194931   | MVR | MR150 | OK | 1.95411 | 1.47245 | -0.408299  | 0.514071  | 0.6072  | 0.999883 |
| gene1630 | gene1630 | SACOL1664 | gi 57650036 ref NC_002951.2 :1691824-1693559 | MVR | MR150 | OK | 15.7896 | 17.742  | 0.168194   | -0.127066 | 0.89889 | 0.999883 |
| gene1631 | gene1631 | greA      | gi 57650036 ref NC_002951.2 :1693884-1694361 | MVR | MR150 | OK | 211.183 | 225.222 | 0.092852   | -0.12009  | 0.90441 | 0.999883 |
| gene1632 | gene1632 | udk       | gi 57650036 ref NC_002951.2 :1694388-1696280 | MVR | MR150 | OK | 52.9015 | 72.2017 | 0.448724   | -0.327026 | 0.74365 | 0.999883 |
| gene1633 | gene1633 | SACOL1667 | gi 57650036 ref NC_002951.2 :1694388-1696280 | MVR | MR150 | OK | 43.4846 | 51.2888 | 0.238137   | -0.242818 | 0.80815 | 0.999883 |
| gene1634 | gene1634 | SACOL1668 | gi 57650036 ref NC_002951.2 :1696291-1697215 | MVR | MR150 | OK | 32.4957 | 37.6465 | 0.212267   | -0.299086 | 0.76488 | 0.999883 |
| gene1635 | gene1635 | SACOL1669 | gi 57650036 ref NC_002951.2 :1697217-1697856 | MVR | MR150 | OK | 11.9733 | 19.1776 | 0.679608   | -0.992186 | 0.32111 | 0.999883 |
| gene1636 | gene1636 | SACOL1670 | gi 57650036 ref NC_002951.2 :1698140-1698449 | MVR | MR150 | OK | 1320.87 | 1313.88 | -0.0076584 | 0.008914  | 0.99289 | 0.999883 |
| gene1637 | gene1637 | SACOL1671 | gi 57650036 ref NC_002951.2 :1698463-1698892 | MVR | MR150 | OK | 256.854 | 315.883 | 0.298446   | -0.382749 | 0.70191 | 0.999883 |
| gene1638 | gene1638 | SACOL1672 | gi 57650036 ref NC_002951.2 :1698895-1699156 | MVR | MR150 | OK | 330.208 | 296.894 | -0.153428  | 0.218588  | 0.82697 | 0.999883 |
| gene1639 | gene1639 | alaS      | gi 57650036 ref NC_002951.2 :1699218-1701849 | MVR | MR150 | OK | 68.2365 | 76.9997 | 0.17431    | -0.198341 | 0.84278 | 0.999883 |
| gene164  | gene164  | rocD1     | gi 57650036 ref NC_002951.2 :194969-196154   | MVR | MR150 | OK | 3.10361 | 2.17668 | -0.511817  | 0.701568  | 0.48295 | 0.999883 |
| gene1640 | gene1640 | SACOL1674 | gi 57650036 ref NC_002951.2 :1702191-1704669 | MVR | MR150 | OK | 23.6924 | 27.5695 | 0.218647   | -0.282772 | 0.77735 | 0.999883 |
| gene1641 | gene1641 | SACOL1675 | gi 57650036 ref NC_002951.2 :1704670-1705339 | MVR | MR150 | OK | 25.3554 | 34.9246 | 0.461951   | -0.673565 | 0.50059 | 0.999883 |
| gene1642 | gene1642 | mnmA      | gi 57650036 ref NC_002951.2 :1705800-1706919 | MVR | MR150 | OK | 55.9323 | 68.9885 | 0.302674   | -0.392479 | 0.69471 | 0.999883 |
| gene1643 | gene1643 | SACOL1677 | gi 57650036 ref NC_002951.2 :1706919-1708062 | MVR | MR150 | OK | 37.9904 | 38.1639 | 0.00657171 | -0.008941 | 0.99287 | 0.999883 |
| gene1644 | gene1644 | SACOL1678 | gi 57650036 ref NC_002951.2 :1708373-1709387 | MVR | MR150 | OK | 73.875  | 84.6558 | 0.196523   | -0.25161  | 0.80134 | 0.999883 |
| gene1645 | gene1645 | SACOL1679 | gi 57650036 ref NC_002951.2 :1709623-1709770 | MVR | MR150 | OK | 149.794 | 31.5869 | -2.24558   | 1.68207   | 0.09256 | 0.611738 |
| gene1646 | gene1646 | SACOL1680 | gi 57650036 ref NC_002951.2 :1709809-1709992 | MVR | MR150 | OK | 23.4188 | 7.56139 | -1.63094   | 1.17665   | 0.23934 | 0.9107   |
| gene1647 | gene1647 | SACOL1681 | gi 57650036 ref NC_002951.2 :1710091-1710514 | MVR | MR150 | OK | 143.02  | 152.538 | 0.0929536  | -0.128082 | 0.89808 | 0.999883 |
| gene1648 | gene1648 | SACOL1682 | gi 57650036 ref NC_002951.2 :1710598-1711873 | MVR | MR150 | OK | 79.3503 | 93.0299 | 0.229459   | -0.281379 | 0.77842 | 0.999883 |
| gene1649 | gene1649 | SACOL1683 | gi 57650036 ref NC_002951.2 :1712033-1712807 | MVR | MR150 | OK | 26.0454 | 37.3423 | 0.519778   | -0.749499 | 0.45356 | 0.999883 |
| gene165  | gene165  | brnQ1     | gi 57650036 ref NC_002951.2 :196406-197762   | MVR | MR150 | OK | 24.179  | 29.9419 | 0.308407   | -0.425678 | 0.67034 | 0.999883 |

|          |          |           |                                              |     |       |        |         |         |            |           |         |          |
|----------|----------|-----------|----------------------------------------------|-----|-------|--------|---------|---------|------------|-----------|---------|----------|
| gene1650 | gene1650 | aspS      | gi 57650036 ref NC_002951.2 :1713267-1715034 | MVR | MR150 | OK     | 33.1294 | 32.4515 | -0.0298263 | 0.039102  | 0.96881 | 0.999883 |
| gene1651 | gene1651 | hisS      | gi 57650036 ref NC_002951.2 :1715049-1716312 | MVR | MR150 | OK     | 18.4624 | 17.2888 | -0.094757  | 0.136414  | 0.89149 | 0.999883 |
| gene1652 | gene1652 | SACOL1687 | gi 57650036 ref NC_002951.2 :1716772-1718097 | MVR | MR150 | OK     | 47.6222 | 52.776  | 0.14825    | -0.160252 | 0.87268 | 0.999883 |
| gene1653 | gene1653 | SACOL1688 | gi 57650036 ref NC_002951.2 :1716772-1718097 | MVR | MR150 | OK     | 61.6972 | 70.6644 | 0.19578    | -0.146553 | 0.88349 | 0.999883 |
| gene1654 | gene1654 | relA2     | gi 57650036 ref NC_002951.2 :1718108-1720298 | MVR | MR150 | OK     | 53.641  | 62.0397 | 0.209857   | -0.250548 | 0.80216 | 0.999883 |
| gene1655 | gene1655 | apt       | gi 57650036 ref NC_002951.2 :1720725-1721244 | MVR | MR150 | OK     | 37.4008 | 47.4813 | 0.344293   | -0.50294  | 0.61501 | 0.999883 |
| gene1656 | gene1656 | recJ      | gi 57650036 ref NC_002951.2 :1721265-1723539 | MVR | MR150 | OK     | 12.7253 | 14.9188 | 0.229432   | -0.3193   | 0.7495  | 0.999883 |
| gene1657 | gene1657 | SACOL1692 | gi 57650036 ref NC_002951.2 :1723741-1726021 | MVR | MR150 | OK     | 95.9294 | 93.5995 | -0.0354711 | 0.039898  | 0.96817 | 0.999883 |
| gene1658 | gene1658 | yajC      | gi 57650036 ref NC_002951.2 :1726295-1726556 | MVR | MR150 | OK     | 464.101 | 363.543 | -0.35231   | 0.489807  | 0.62427 | 0.999883 |
| gene1659 | gene1659 | tgt       | gi 57650036 ref NC_002951.2 :1726574-1727714 | MVR | MR150 | OK     | 66.0146 | 60.7682 | -0.119467  | 0.154289  | 0.87738 | 0.999883 |
| gene166  | gene166  | entB      | gi 57650036 ref NC_002951.2 :198037-198535   | MVR | MR150 | OK     | 7.87711 | 13.3457 | 0.760631   | -1.05522  | 0.29133 | 0.975616 |
| gene1660 | gene1660 | queA      | gi 57650036 ref NC_002951.2 :1727736-1728762 | MVR | MR150 | OK     | 31.4997 | 32.9998 | 0.0671221  | -0.094153 | 0.92499 | 0.999883 |
| gene1661 | gene1661 | ruvB      | gi 57650036 ref NC_002951.2 :1728763-1729768 | MVR | MR150 | OK     | 59.4514 | 50.0295 | -0.248931  | 0.331715  | 0.7401  | 0.999883 |
| gene1662 | gene1662 | ruvA      | gi 57650036 ref NC_002951.2 :1729799-1730402 | MVR | MR150 | OK     | 43.0271 | 48.2348 | 0.164827   | -0.237863 | 0.81199 | 0.999883 |
| gene1663 | gene1663 | SACOL1698 | gi 57650036 ref NC_002951.2 :1730415-1730874 | MVR | MR150 | OK     | 24.7572 | 23.604  | -0.0688163 | 0.100532  | 0.91992 | 0.999883 |
| gene1664 | gene1664 | obgE      | gi 57650036 ref NC_002951.2 :1730883-1732176 | MVR | MR150 | OK     | 64.9391 | 61.3725 | -0.081495  | 0.10349   | 0.91757 | 0.999883 |
| gene1665 | gene1665 | rpmA      | gi 57650036 ref NC_002951.2 :1732530-1732815 | MVR | MR150 | OK     | 1647.91 | 1497.3  | -0.138275  | 0.161355  | 0.87181 | 0.999883 |
| gene1666 | gene1666 | SACOL1701 | gi 57650036 ref NC_002951.2 :1732826-1733147 | MVR | MR150 | OK     | 173.233 | 201.55  | 0.218427   | -0.310634 | 0.75608 | 0.999883 |
| gene1667 | gene1667 | rplU      | gi 57650036 ref NC_002951.2 :1733152-1733461 | MVR | MR150 | OK     | 565.003 | 651.009 | 0.204417   | -0.260662 | 0.79435 | 0.999883 |
| gene1668 | gene1668 | SACOL1703 | gi 57650036 ref NC_002951.2 :1733627-1735000 | MVR | MR150 | OK     | 19.4017 | 19.4152 | 0.00100345 | -0.000695 | 0.99945 | 0.999883 |
| gene1669 | gene1669 | mreC      | gi 57650036 ref NC_002951.2 :1733627-1735000 | MVR | MR150 | OK     | 31.4562 | 29.7656 | -0.0796996 | 0.097523  | 0.92231 | 0.999883 |
| gene167  | gene167  | ipdC      | gi 57650036 ref NC_002951.2 :198661-200302   | MVR | MR150 | OK     | 12.4652 | 10.2038 | -0.28879   | 0.418748  | 0.6754  | 0.999883 |
| gene1670 | gene1670 | SACOL1705 | gi 57650036 ref NC_002951.2 :1735392-1735866 | MVR | MR150 | OK     | 27.0294 | 31.2492 | 0.209289   | -0.307309 | 0.75861 | 0.999883 |
| gene1671 | gene1671 | SACOL1706 | gi 57650036 ref NC_002951.2 :1736339-1736624 | MVR | MR150 | OK     | 268.347 | 246.878 | -0.120303  | 0.170874  | 0.86432 | 0.999883 |
| gene1672 | gene1672 | radC      | gi 57650036 ref NC_002951.2 :1736691-1738082 | MVR | MR150 | OK     | 5.3034  | 6.60121 | 0.315813   | -0.331626 | 0.74017 | 0.999883 |
| gene1673 | gene1673 | SACOL1708 | gi 57650036 ref NC_002951.2 :1736691-1738082 | MVR | MR150 | OK     | 5.19424 | 5.1231  | -0.0198963 | 0.019917  | 0.98411 | 0.999883 |
| gene1674 | gene1674 | folC      | gi 57650036 ref NC_002951.2 :1738351-1739623 | MVR | MR150 | OK     | 47.9362 | 53.7168 | 0.16426    | -0.21412  | 0.83045 | 0.999883 |
| gene1675 | gene1675 | valS      | gi 57650036 ref NC_002951.2 :1739635-1742266 | MVR | MR150 | OK     | 58.9293 | 53.6856 | -0.134451  | 0.157273  | 0.87503 | 0.999883 |
| gene1676 | gene1676 | SACOL1711 | gi 57650036 ref NC_002951.2 :1742668-1743229 | MVR | MR150 | OK     | 91.0209 | 108.101 | 0.248108   | -0.338313 | 0.73513 | 0.999883 |
| gene1677 | gene1677 | SACOL1712 | gi 57650036 ref NC_002951.2 :1743451-1744525 | MVR | MR150 | OK     | 33.987  | 37.8464 | 0.155174   | -0.21414  | 0.83044 | 0.999883 |
| gene1678 | gene1678 | hemL1     | gi 57650036 ref NC_002951.2 :1744720-1746007 | MVR | MR150 | OK     | 27.5087 | 30.4329 | 0.145746   | -0.201009 | 0.84069 | 0.999883 |
| gene1679 | gene1679 | hemB      | gi 57650036 ref NC_002951.2 :1746054-1747029 | MVR | MR150 | OK     | 18.7656 | 21.5369 | 0.198717   | -0.288751 | 0.77277 | 0.999883 |
| gene168  | gene168  | SACOL0174 | gi 57650036 ref NC_002951.2 :200495-202621   | MVR | MR150 | NOTEST | 0       | 0       | 0          | 0         | 1       | 1        |

|          |          |           |                                              |     |       |        |         |         |            |           |         |          |
|----------|----------|-----------|----------------------------------------------|-----|-------|--------|---------|---------|------------|-----------|---------|----------|
| gene1680 | gene1680 | hemD      | gi 57650036 ref NC_002951.2 :1747031-1747700 | MVR | MR150 | OK     | 8.01388 | 6.20156 | -0.369869  | 0.520072  | 0.60301 | 0.999883 |
| gene1681 | gene1681 | hemC      | gi 57650036 ref NC_002951.2 :1747721-1748648 | MVR | MR150 | OK     | 30.444  | 28.8556 | -0.0773031 | 0.110418  | 0.91208 | 0.999883 |
| gene1682 | gene1682 | SACOL1718 | gi 57650036 ref NC_002951.2 :1748689-1749505 | MVR | MR150 | OK     | 26.964  | 33.8035 | 0.326138   | -0.469791 | 0.63851 | 0.999883 |
| gene1683 | gene1683 | hemA      | gi 57650036 ref NC_002951.2 :1749526-1750873 | MVR | MR150 | OK     | 240.707 | 269.988 | 0.165618   | -0.179244 | 0.85775 | 0.999883 |
| gene1684 | gene1684 | engB      | gi 57650036 ref NC_002951.2 :1751089-1751680 | MVR | MR150 | OK     | 11.3067 | 18.7893 | 0.732735   | -1.06341  | 0.2876  | 0.975616 |
| gene1685 | gene1685 | clpX      | gi 57650036 ref NC_002951.2 :1751833-1753096 | MVR | MR150 | OK     | 271.082 | 277.629 | 0.0344256  | -0.037272 | 0.97027 | 0.999883 |
| gene1686 | gene1686 | tig       | gi 57650036 ref NC_002951.2 :1753246-1754548 | MVR | MR150 | OK     | 386.817 | 384.964 | -0.0069285 | 0.007255  | 0.99421 | 0.999883 |
| gene1687 | gene1687 | SACOL1723 | gi 57650036 ref NC_002951.2 :1754710-1755640 | MVR | MR150 | OK     | 24.6824 | 28.5274 | 0.208862   | -0.300263 | 0.76398 | 0.999883 |
| gene1688 | gene1688 | SACOL1724 | gi 57650036 ref NC_002951.2 :1755658-1756267 | MVR | MR150 | OK     | 30.2123 | 23.5768 | -0.357765  | 0.525234  | 0.59942 | 0.999883 |
| gene1689 | gene1689 | rplT      | gi 57650036 ref NC_002951.2 :1756408-1756765 | MVR | MR150 | OK     | 395.003 | 428.628 | 0.117864   | -0.151367 | 0.87969 | 0.999883 |
| gene169  | gene169  | SACOL0175 | gi 57650036 ref NC_002951.2 :200495-202621   | MVR | MR150 | OK     | 11.7814 | 13.9399 | 0.242706   | -0.343687 | 0.73108 | 0.999883 |
| gene1690 | gene1690 | rpmI      | gi 57650036 ref NC_002951.2 :1756811-1757012 | MVR | MR150 | OK     | 96.8904 | 151.746 | 0.647236   | -0.912375 | 0.36157 | 0.999883 |
| gene1691 | gene1691 | infC      | gi 57650036 ref NC_002951.2 :1757040-1757568 | MVR | MR150 | OK     | 124.081 | 157.672 | 0.345641   | -0.45958  | 0.64582 | 0.999883 |
| gene1692 | gene1692 | SACOL1728 | gi 57650036 ref NC_002951.2 :1757796-1759290 | MVR | MR150 | OK     | 14.6445 | 12.5463 | -0.223099  | 0.322414  | 0.74714 | 0.999883 |
| gene1693 | gene1693 | thrS      | gi 57650036 ref NC_002951.2 :1759715-1761653 | MVR | MR150 | OK     | 140.831 | 138.365 | -0.0254904 | 0.028084  | 0.9776  | 0.999883 |
| gene1694 | gene1694 | dnaI      | gi 57650036 ref NC_002951.2 :1762065-1764386 | MVR | MR150 | OK     | 102.185 | 112.772 | 0.142223   | -0.114321 | 0.90898 | 0.999883 |
| gene1695 | gene1695 | SACOL1732 | gi 57650036 ref NC_002951.2 :1762065-1764386 | MVR | MR150 | OK     | 60.4228 | 74.9839 | 0.311488   | -0.256876 | 0.79727 | 0.999883 |
| gene1696 | gene1696 | nrdR      | gi 57650036 ref NC_002951.2 :1764386-1764857 | MVR | MR150 | OK     | 153.97  | 186.172 | 0.273985   | -0.364558 | 0.71544 | 0.999883 |
| gene1697 | gene1697 | gapA2     | gi 57650036 ref NC_002951.2 :1765066-1766092 | MVR | MR150 | OK     | 506.911 | 777.35  | 0.616831   | -0.639924 | 0.52222 | 0.999883 |
| gene1698 | gene1698 | coaE      | gi 57650036 ref NC_002951.2 :1766261-1766885 | MVR | MR150 | OK     | 61.3774 | 80.5049 | 0.391368   | -0.543231 | 0.58697 | 0.999883 |
| gene1699 | gene1699 | fpg       | gi 57650036 ref NC_002951.2 :1766900-1767773 | MVR | MR150 | OK     | 36.3997 | 47.0958 | 0.371669   | -0.518825 | 0.60388 | 0.999883 |
| gene17   | gene17   | purA      | gi 57650036 ref NC_002951.2 :22464-23748     | MVR | MR150 | OK     | 32.5521 | 10.3137 | -1.65819   | 2.34309   | 0.01912 | 0.252566 |
| gene170  | gene170  | SACOL0176 | gi 57650036 ref NC_002951.2 :203206-205158   | MVR | MR150 | OK     | 14.5495 | 19.6788 | 0.435667   | -0.478864 | 0.63204 | 0.999883 |
| gene1700 | gene1700 | polA      | gi 57650036 ref NC_002951.2 :1767788-1770419 | MVR | MR150 | OK     | 49.2333 | 55.2608 | 0.166623   | -0.196596 | 0.84414 | 0.999883 |
| gene1701 | gene1701 | SACOL1738 | gi 57650036 ref NC_002951.2 :1770712-1772200 | MVR | MR150 | OK     | 7.17192 | 7.61039 | 0.0856116  | -0.12587  | 0.89984 | 0.999883 |
| gene1702 | gene1702 | SACOL1739 | gi 57650036 ref NC_002951.2 :1772698-1775064 | MVR | MR150 | OK     | 81.1355 | 113.331 | 0.482141   | -0.466987 | 0.64051 | 0.999883 |
| gene1703 | gene1703 | phoP      | gi 57650036 ref NC_002951.2 :1772698-1775064 | MVR | MR150 | OK     | 97.604  | 104.283 | 0.0954881  | -0.055076 | 0.95608 | 0.999883 |
| gene1704 | gene1704 | icd       | gi 57650036 ref NC_002951.2 :1775453-1776722 | MVR | MR150 | OK     | 867.062 | 1064.74 | 0.296298   | -0.302903 | 0.76196 | 0.999883 |
| gene1705 | gene1705 | gltA      | gi 57650036 ref NC_002951.2 :1776770-1777892 | MVR | MR150 | OK     | 567.028 | 720.86  | 0.3463     | -0.356608 | 0.72139 | 0.999883 |
| gene1706 | gene1706 | SACOL1743 | gi 57650036 ref NC_002951.2 :1778239-1779601 | MVR | MR150 | OK     | 188.456 | 201.789 | 0.0986254  | -0.109433 | 0.91286 | 0.999883 |
| gene1707 | gene1707 | SACOL1744 | gi 57650036 ref NC_002951.2 :1779633-1781285 | MVR | MR150 | NOTEST | 0.69628 | 0.52743 | -0.400696  | 0.45941   | 0.64594 | 1        |
| gene1708 | gene1708 | pyk       | gi 57650036 ref NC_002951.2 :1781925-1783683 | MVR | MR150 | OK     | 120.484 | 125.05  | 0.0536677  | -0.060565 | 0.95171 | 0.999883 |
| gene1709 | gene1709 | pfkA      | gi 57650036 ref NC_002951.2 :1783704-1784673 | MVR | MR150 | OK     | 44.1913 | 48.7862 | 0.142708   | -0.194318 | 0.84593 | 0.999883 |

|          |          |           |                                              |     |       |        |         |         |            |           |         |          |
|----------|----------|-----------|----------------------------------------------|-----|-------|--------|---------|---------|------------|-----------|---------|----------|
| gene171  | gene171  | murQ      | gi 57650036 ref NC_002951.2 :203206-205158   | MVR | MR150 | OK     | 12.9752 | 14.2184 | 0.132006   | -0.117182 | 0.90672 | 0.999883 |
| gene1710 | gene1710 | accA      | gi 57650036 ref NC_002951.2 :1784941-1786743 | MVR | MR150 | OK     | 51.7446 | 51.1792 | -0.0158524 | 0.014878  | 0.98813 | 0.999883 |
| gene1711 | gene1711 | accD      | gi 57650036 ref NC_002951.2 :1784941-1786743 | MVR | MR150 | OK     | 48.6047 | 47.9361 | -0.0199854 | 0.017054  | 0.98639 | 0.999883 |
| gene1712 | gene1712 | SACOL1749 | gi 57650036 ref NC_002951.2 :1786937-1788167 | MVR | MR150 | OK     | 40.7518 | 37.0231 | -0.138436  | 0.186184  | 0.8523  | 0.999883 |
| gene1713 | gene1713 | dnaE      | gi 57650036 ref NC_002951.2 :1788616-1791814 | MVR | MR150 | OK     | 52.5927 | 59.0155 | 0.166231   | -0.190206 | 0.84915 | 0.999883 |
| gene1714 | gene1714 | SACOL1751 | gi 57650036 ref NC_002951.2 :1791834-1792776 | MVR | MR150 | OK     | 59.535  | 69.7529 | 0.228515   | -0.301942 | 0.7627  | 0.999883 |
| gene1715 | gene1715 | SACOL1752 | gi 57650036 ref NC_002951.2 :1793036-1794335 | MVR | MR150 | OK     | 33.186  | 37.0685 | 0.159617   | -0.215491 | 0.82938 | 0.999883 |
| gene1716 | gene1716 | SACOL1753 | gi 57650036 ref NC_002951.2 :1794539-1794953 | MVR | MR150 | OK     | 547.266 | 564.035 | 0.0435416  | -0.05204  | 0.9585  | 0.999883 |
| gene1717 | gene1717 | SACOL1754 | gi 57650036 ref NC_002951.2 :1795257-1795946 | MVR | MR150 | OK     | 64.7503 | 58.2289 | -0.153151  | 0.212538  | 0.83169 | 0.999883 |
| gene1718 | gene1718 | pepQ      | gi 57650036 ref NC_002951.2 :1796120-1797176 | MVR | MR150 | OK     | 32.0511 | 35.2429 | 0.136956   | -0.190652 | 0.8488  | 0.999883 |
| gene1719 | gene1719 | SACOL1757 | gi 57650036 ref NC_002951.2 :1797269-1797368 | MVR | MR150 | NOTEST | 0       | 0       | 0          | 0         | 1       | 1        |
| gene172  | gene172  | SACOL0178 | gi 57650036 ref NC_002951.2 :205169-206624   | MVR | MR150 | OK     | 23.4702 | 23.1873 | -0.0174989 | 0.02431   | 0.98061 | 0.999883 |
| gene1720 | gene1720 | ald2      | gi 57650036 ref NC_002951.2 :1797491-1798610 | MVR | MR150 | OK     | 305.929 | 318.613 | 0.0586117  | -0.063568 | 0.94931 | 0.999883 |
| gene1721 | gene1721 | SACOL1759 | gi 57650036 ref NC_002951.2 :1798750-1799251 | MVR | MR150 | OK     | 935.132 | 1138.87 | 0.28436    | -0.306811 | 0.75899 | 0.999883 |
| gene1722 | gene1722 | ackA      | gi 57650036 ref NC_002951.2 :1799496-1800699 | MVR | MR150 | OK     | 166.844 | 224.299 | 0.426921   | -0.481296 | 0.63031 | 0.999883 |
| gene1723 | gene1723 | SACOL1761 | gi 57650036 ref NC_002951.2 :1800786-1801734 | MVR | MR150 | OK     | 85.13   | 106.861 | 0.327998   | -0.414952 | 0.67818 | 0.999883 |
| gene1724 | gene1724 | tpx       | gi 57650036 ref NC_002951.2 :1801856-1802351 | MVR | MR150 | OK     | 684.409 | 773.593 | 0.176716   | -0.197747 | 0.84324 | 0.999883 |
| gene1725 | gene1725 | SACOL1763 | gi 57650036 ref NC_002951.2 :1802448-1803219 | MVR | MR150 | OK     | 14.9647 | 9.65271 | -0.632557  | 0.925613  | 0.35465 | 0.999883 |
| gene1726 | gene1726 | thiI      | gi 57650036 ref NC_002951.2 :1803262-1805625 | MVR | MR150 | OK     | 10.8193 | 9.57172 | -0.176752  | 0.195105  | 0.84531 | 0.999883 |
| gene1727 | gene1727 | SACOL1765 | gi 57650036 ref NC_002951.2 :1803262-1805625 | MVR | MR150 | OK     | 8.68277 | 7.16837 | -0.27651   | 0.257309  | 0.79694 | 0.999883 |
| gene1728 | gene1728 | SACOL1766 | gi 57650036 ref NC_002951.2 :1805782-1805923 | MVR | MR150 | NOTEST | 0       | 0       | 0          | 0         | 1       | 1        |
| gene1729 | gene1729 | SACOL1767 | gi 57650036 ref NC_002951.2 :1805996-1807691 | MVR | MR150 | OK     | 126.915 | 127.245 | 0.00374293 | -0.004227 | 0.99663 | 0.999883 |
| gene173  | gene173  | SACOL0179 | gi 57650036 ref NC_002951.2 :206626-207502   | MVR | MR150 | OK     | 16.2328 | 16.082  | -0.0134672 | 0.019774  | 0.98422 | 0.999883 |
| gene1730 | gene1730 | SACOL1768 | gi 57650036 ref NC_002951.2 :1807827-1808292 | MVR | MR150 | OK     | 7.72933 | 10.3831 | 0.425828   | -0.575948 | 0.56465 | 0.999883 |
| gene1731 | gene1731 | rpsD      | gi 57650036 ref NC_002951.2 :1808535-1809138 | MVR | MR150 | OK     | 373.056 | 412.464 | 0.144877   | -0.167226 | 0.86719 | 0.999883 |
| gene1732 | gene1732 | SACOL1770 | gi 57650036 ref NC_002951.2 :1809353-1810097 | MVR | MR150 | OK     | 2.58607 | 2.53287 | -0.0299907 | 0.037669  | 0.96995 | 0.999883 |
| gene1733 | gene1733 | SACOL1771 | gi 57650036 ref NC_002951.2 :1810176-1810623 | MVR | MR150 | OK     | 16.4139 | 12.3698 | -0.408097  | 0.575974  | 0.56463 | 0.999883 |
| gene1734 | gene1734 | SACOL1772 | gi 57650036 ref NC_002951.2 :1810736-1813488 | MVR | MR150 | OK     | 11.8586 | 11.1551 | -0.0882226 | 0.075893  | 0.9395  | 0.999883 |
| gene1735 | gene1735 | serA      | gi 57650036 ref NC_002951.2 :1810736-1813488 | MVR | MR150 | OK     | 11.8583 | 13.4086 | 0.177256   | -0.193579 | 0.84651 | 0.999883 |
| gene1736 | gene1736 | SACOL1774 | gi 57650036 ref NC_002951.2 :1813637-1814768 | MVR | MR150 | OK     | 37.5257 | 34.8723 | -0.1058    | 0.14492   | 0.88477 | 0.999883 |
| gene1737 | gene1737 | SACOL1775 | gi 57650036 ref NC_002951.2 :1814874-1816341 | MVR | MR150 | OK     | 29.3604 | 35.056  | 0.255787   | -0.34337  | 0.73132 | 0.999883 |
| gene1738 | gene1738 | SACOL1776 | gi 57650036 ref NC_002951.2 :1816468-1817086 | MVR | MR150 | OK     | 48.3649 | 46.8717 | -0.045242  | 0.065021  | 0.94816 | 0.999883 |
| gene1739 | gene1739 | SACOL1777 | gi 57650036 ref NC_002951.2 :1817257-1818532 | MVR | MR150 | OK     | 29.3251 | 30.7725 | 0.0695061  | -0.095607 | 0.92383 | 0.999883 |

|          |          |           |                                              |     |       |        |         |         |            |           |         |          |
|----------|----------|-----------|----------------------------------------------|-----|-------|--------|---------|---------|------------|-----------|---------|----------|
| gene174  | gene174  | SACOL0180 | gi 57650036 ref NC_002951.2 :208189-210979   | MVR | MR150 | OK     | 16.025  | 15.4365 | -0.0539798 | 0.072409  | 0.94228 | 0.999883 |
| gene1740 | gene1740 | tyrS      | gi 57650036 ref NC_002951.2 :1818625-1819888 | MVR | MR150 | OK     | 21.896  | 23.1958 | 0.0831949  | -0.117777 | 0.90624 | 0.999883 |
| gene1741 | gene1741 | SACOL1779 | gi 57650036 ref NC_002951.2 :1820269-1821175 | MVR | MR150 | OK     | 18.7772 | 20.8211 | 0.149069   | -0.217519 | 0.8278  | 0.999883 |
| gene1742 | gene1742 | SACOL1781 | gi 57650036 ref NC_002951.2 :1821377-1824065 | MVR | MR150 | OK     | 6.10083 | 5.3564  | -0.187742  | 0.27367   | 0.78434 | 0.999883 |
| gene1743 | gene1743 | fhs       | gi 57650036 ref NC_002951.2 :1824398-1826066 | MVR | MR150 | OK     | 336.019 | 402.735 | 0.261289   | -0.26987  | 0.78726 | 0.999883 |
| gene1744 | gene1744 | acs       | gi 57650036 ref NC_002951.2 :1826505-1828212 | MVR | MR150 | OK     | 384.568 | 370.87  | -0.0523225 | 0.053899  | 0.95702 | 0.999883 |
| gene1745 | gene1745 | acuA      | gi 57650036 ref NC_002951.2 :1828380-1829013 | MVR | MR150 | OK     | 63.0302 | 68.9347 | 0.129188   | -0.180214 | 0.85699 | 0.999883 |
| gene1746 | gene1746 | acuC      | gi 57650036 ref NC_002951.2 :1829037-1830207 | MVR | MR150 | OK     | 69.9182 | 74.8355 | 0.0980541  | -0.12429  | 0.90109 | 0.999883 |
| gene1747 | gene1747 | ccpA      | gi 57650036 ref NC_002951.2 :1830304-1831294 | MVR | MR150 | OK     | 334.605 | 320.993 | -0.0599154 | 0.065646  | 0.94766 | 0.999883 |
| gene1748 | gene1748 | SACOL1787 | gi 57650036 ref NC_002951.2 :1831833-1832925 | MVR | MR150 | OK     | 66.3627 | 58.1998 | -0.18936   | 0.24643   | 0.80535 | 0.999883 |
| gene1749 | gene1749 | SACOL1788 | gi 57650036 ref NC_002951.2 :1833624-1835142 | MVR | MR150 | OK     | 70.6896 | 66.0053 | -0.098916  | 0.12166   | 0.90317 | 0.999883 |
| gene175  | gene175  | SACOL0181 | gi 57650036 ref NC_002951.2 :211183-212026   | MVR | MR150 | OK     | 51.1045 | 54.7686 | 0.0998997  | -0.136771 | 0.89121 | 0.999883 |
| gene1750 | gene1750 | SACOL1789 | gi 57650036 ref NC_002951.2 :1835215-1835707 | MVR | MR150 | OK     | 442.383 | 383.945 | -0.204396  | 0.243667  | 0.80749 | 0.999883 |
| gene1751 | gene1751 | murC      | gi 57650036 ref NC_002951.2 :1835780-1837094 | MVR | MR150 | OK     | 84.8284 | 94.1734 | 0.150773   | -0.183217 | 0.85463 | 0.999883 |
| gene1752 | gene1752 | SACOL1791 | gi 57650036 ref NC_002951.2 :1837117-1840942 | MVR | MR150 | OK     | 46.7173 | 53.7532 | 0.202393   | -0.229525 | 0.81846 | 0.999883 |
| gene1753 | gene1753 | SACOL1792 | gi 57650036 ref NC_002951.2 :1840962-1841559 | MVR | MR150 | OK     | 23.034  | 37.0114 | 0.684201   | -1.00108  | 0.31679 | 0.999883 |
| gene1754 | gene1754 | SACOL1793 | gi 57650036 ref NC_002951.2 :1841587-1842445 | MVR | MR150 | OK     | 30.5278 | 42.8167 | 0.488048   | -0.690405 | 0.48994 | 0.999883 |
| gene1755 | gene1755 | SACOL1794 | gi 57650036 ref NC_002951.2 :1842544-1842856 | MVR | MR150 | OK     | 134.581 | 173.933 | 0.370057   | -0.534665 | 0.59288 | 0.999883 |
| gene1756 | gene1756 | pepA1     | gi 57650036 ref NC_002951.2 :1842920-1843997 | MVR | MR150 | OK     | 77.1274 | 92.3718 | 0.260208   | -0.327741 | 0.74311 | 0.999883 |
| gene1757 | gene1757 | SACOL1796 | gi 57650036 ref NC_002951.2 :1844083-1844395 | MVR | MR150 | OK     | 434.538 | 436.766 | 0.00737856 | -0.009728 | 0.99224 | 0.999883 |
| gene1758 | gene1758 | SACOL1797 | gi 57650036 ref NC_002951.2 :1844519-1845296 | MVR | MR150 | OK     | 21.8864 | 22.8196 | 0.0602391  | -0.088132 | 0.92977 | 0.999883 |
| gene1759 | gene1759 | trmB      | gi 57650036 ref NC_002951.2 :1845831-1846476 | MVR | MR150 | OK     | 130.525 | 130.371 | -0.0017074 | 0.002215  | 0.99823 | 0.999883 |
| gene176  | gene176  | SACOL0182 | gi 57650036 ref NC_002951.2 :212027-214050   | MVR | MR150 | NOTEST | 0       | 0       | 0          | 0         | 1       | 1        |
| gene1760 | gene1760 | SACOL1799 | gi 57650036 ref NC_002951.2 :1846490-1847282 | MVR | MR150 | OK     | 128.058 | 135.003 | 0.0761872  | -0.095487 | 0.92393 | 0.999883 |
| gene1761 | gene1761 | dat       | gi 57650036 ref NC_002951.2 :1847831-1848680 | MVR | MR150 | OK     | 115.262 | 120.321 | 0.0619801  | -0.077835 | 0.93796 | 0.999883 |
| gene1762 | gene1762 | SACOL1801 | gi 57650036 ref NC_002951.2 :1848683-1850093 | MVR | MR150 | OK     | 62.2328 | 68.9836 | 0.148579   | -0.185573 | 0.85278 | 0.999883 |
| gene1763 | gene1763 | SACOL1802 | gi 57650036 ref NC_002951.2 :1851012-1851435 | MVR | MR150 | OK     | 26.4529 | 26.6771 | 0.0121758  | -0.017747 | 0.98584 | 0.999883 |
| gene1764 | gene1764 | SACOL1803 | gi 57650036 ref NC_002951.2 :1851451-1853805 | MVR | MR150 | OK     | 40.3801 | 33.0249 | -0.290091  | 0.187707  | 0.85111 | 0.999883 |
| gene1765 | gene1765 | SACOL1804 | gi 57650036 ref NC_002951.2 :1851451-1853805 | MVR | MR150 | OK     | 31.318  | 37.5054 | 0.260106   | -0.283505 | 0.77679 | 0.999883 |
| gene1766 | gene1766 | SACOL1805 | gi 57650036 ref NC_002951.2 :1854211-1855480 | MVR | MR150 | OK     | 19.4198 | 17.335  | -0.163837  | 0.235386  | 0.81391 | 0.999883 |
| gene1767 | gene1767 | SACOL1806 | gi 57650036 ref NC_002951.2 :1855596-1862157 | MVR | MR150 | OK     | 3.06465 | 2.38426 | -0.362177  | 0.523487  | 0.60064 | 0.999883 |
| gene1768 | gene1768 | SACOL1807 | gi 57650036 ref NC_002951.2 :1862482-1862794 | MVR | MR150 | OK     | 20.5294 | 29.6331 | 0.529521   | -0.730031 | 0.46537 | 0.999883 |
| gene1769 | gene1769 | leuS      | gi 57650036 ref NC_002951.2 :1862815-1865233 | MVR | MR150 | OK     | 22.4474 | 19.2681 | -0.220334  | 0.291881  | 0.77038 | 0.999883 |

|          |          |           |                                              |     |       |        |         |         |            |           |         |          |
|----------|----------|-----------|----------------------------------------------|-----|-------|--------|---------|---------|------------|-----------|---------|----------|
| gene177  | gene177  | SACOL0183 | gi 57650036 ref NC_002951.2 :212027-214050   | MVR | MR150 | NOTEST | 0       | 0       | 0          | 0         | 1       | 1        |
| gene1770 | gene1770 | SACOL1809 | gi 57650036 ref NC_002951.2 :1865520-1866702 | MVR | MR150 | OK     | 24.3572 | 30.4107 | 0.320228   | -0.448659 | 0.65368 | 0.999883 |
| gene1771 | gene1771 | SACOL1810 | gi 57650036 ref NC_002951.2 :1866811-1868325 | MVR | MR150 | OK     | 26.6749 | 30.2599 | 0.181923   | -0.210383 | 0.83337 | 0.999883 |
| gene1772 | gene1772 | SACOL1811 | gi 57650036 ref NC_002951.2 :1866811-1868325 | MVR | MR150 | OK     | 25.9494 | 25.6466 | -0.0169292 | 0.012842  | 0.98975 | 0.999883 |
| gene1773 | gene1773 | rot       | gi 57650036 ref NC_002951.2 :1868444-1868945 | MVR | MR150 | OK     | 250.211 | 213.951 | -0.225866  | 0.28746   | 0.77376 | 0.999883 |
| gene1774 | gene1774 | SACOL1813 | gi 57650036 ref NC_002951.2 :1869365-1870078 | MVR | MR150 | OK     | 1.79343 | 0.89527 | -1.00232   | 1.05569   | 0.29111 | 0.975616 |
| gene1775 | gene1775 | SACOL1814 | gi 57650036 ref NC_002951.2 :1870424-1871252 | MVR | MR150 | OK     | 105.714 | 110.202 | 0.0599752  | -0.076388 | 0.93911 | 0.999883 |
| gene1776 | gene1776 | SACOL1815 | gi 57650036 ref NC_002951.2 :1871254-1871374 | MVR | MR150 | NOTEST | 0       | 0       | 0          | 0         | 1       | 1        |
| gene1777 | gene1777 | putA      | gi 57650036 ref NC_002951.2 :1871485-1872487 | MVR | MR150 | OK     | 149.201 | 117.236 | -0.347849  | 0.419673  | 0.67473 | 0.999883 |
| gene1778 | gene1778 | ribH      | gi 57650036 ref NC_002951.2 :1872608-1873073 | MVR | MR150 | OK     | 4.83083 | 8.07578 | 0.74133    | -0.948131 | 0.34306 | 0.999883 |
| gene1779 | gene1779 | ribBA     | gi 57650036 ref NC_002951.2 :1873085-1874267 | MVR | MR150 | OK     | 5.55516 | 4.36666 | -0.347297  | 0.502153  | 0.61556 | 0.999883 |
| gene178  | gene178  | SACOL0184 | gi 57650036 ref NC_002951.2 :214314-215907   | MVR | MR150 | OK     | 9.74068 | 9.67574 | -0.0096512 | 0.014096  | 0.98875 | 0.999883 |
| gene1780 | gene1780 | ribE      | gi 57650036 ref NC_002951.2 :1874277-1874910 | MVR | MR150 | OK     | 4.00192 | 4.24214 | 0.0841     | -0.109877 | 0.91251 | 0.999883 |
| gene1781 | gene1781 | ribD      | gi 57650036 ref NC_002951.2 :1874916-1875960 | MVR | MR150 | OK     | 5.56263 | 3.81024 | -0.545885  | 0.777589  | 0.43681 | 0.999883 |
| gene1782 | gene1782 | SACOL1821 | gi 57650036 ref NC_002951.2 :1876440-1877943 | MVR | MR150 | OK     | 3.56678 | 3.64386 | 0.0308466  | -0.044561 | 0.96446 | 0.999883 |
| gene1783 | gene1783 | arsR      | gi 57650036 ref NC_002951.2 :1878465-1880072 | MVR | MR150 | OK     | 19.5079 | 23.9427 | 0.295532   | -0.202277 | 0.8397  | 0.999883 |
| gene1784 | gene1784 | arsB      | gi 57650036 ref NC_002951.2 :1878465-1880072 | MVR | MR150 | OK     | 7.49508 | 8.68744 | 0.212986   | -0.275953 | 0.78258 | 0.999883 |
| gene1785 | gene1785 | arsC      | gi 57650036 ref NC_002951.2 :1880089-1880485 | MVR | MR150 | OK     | 10.6601 | 7.75603 | -0.458828  | 0.596941  | 0.55055 | 0.999883 |
| gene1786 | gene1786 | SACOL1825 | gi 57650036 ref NC_002951.2 :1880779-1881634 | MVR | MR150 | OK     | 219.529 | 247.089 | 0.170619   | -0.197457 | 0.84347 | 0.999883 |
| gene1787 | gene1787 | SACOL1826 | gi 57650036 ref NC_002951.2 :1881909-1882134 | MVR | MR150 | OK     | 130.665 | 235.556 | 0.850195   | -1.24174  | 0.21433 | 0.89416  |
| gene1788 | gene1788 | SACOL1827 | gi 57650036 ref NC_002951.2 :1882332-1882803 | MVR | MR150 | OK     | 5.42315 | 12.4115 | 1.19447    | -1.58359  | 0.11329 | 0.667905 |
| gene1789 | gene1789 | SACOL1828 | gi 57650036 ref NC_002951.2 :1882915-1883789 | MVR | MR150 | OK     | 17.4228 | 15.0242 | -0.213694  | 0.160486  | 0.8725  | 0.999883 |
| gene179  | gene179  | SACOL0185 | gi 57650036 ref NC_002951.2 :216034-217342   | MVR | MR150 | OK     | 5.34123 | 5.2525  | -0.0241669 | 0.035268  | 0.97187 | 0.999883 |
| gene1790 | gene1790 | SACOL1829 | gi 57650036 ref NC_002951.2 :1882915-1883789 | MVR | MR150 | OK     | 43.2931 | 45.6985 | 0.0780098  | -0.097299 | 0.92249 | 0.999883 |
| gene1791 | gene1791 | SACOL1830 | gi 57650036 ref NC_002951.2 :1884084-1884720 | MVR | MR150 | OK     | 4.25659 | 4.21297 | -0.0148585 | 0.019517  | 0.98443 | 0.999883 |
| gene1792 | gene1792 | tal       | gi 57650036 ref NC_002951.2 :1885159-1885873 | MVR | MR150 | OK     | 267.272 | 294.567 | 0.140286   | -0.163459 | 0.87016 | 0.999883 |
| gene1793 | gene1793 | crcB      | gi 57650036 ref NC_002951.2 :1886612-1887406 | MVR | MR150 | OK     | 5.01567 | 5.00806 | -0.0021903 | 0.001967  | 0.99843 | 0.999883 |
| gene1794 | gene1794 | SACOL1833 | gi 57650036 ref NC_002951.2 :1886612-1887406 | MVR | MR150 | OK     | 11.0643 | 10.7134 | -0.0465075 | 0.048718  | 0.96114 | 0.999883 |
| gene1795 | gene1795 | SACOL1834 | gi 57650036 ref NC_002951.2 :1887816-1889426 | MVR | MR150 | NOTEST | 0.37979 | 0.10863 | -1.80581   | 1.32825   | 0.18409 | 1        |
| gene1796 | gene1796 | SACOL1835 | gi 57650036 ref NC_002951.2 :1889488-1890322 | MVR | MR150 | OK     | 35.7543 | 39.848  | 0.156388   | -0.221513 | 0.82469 | 0.999883 |
| gene1797 | gene1797 | SACOL1836 | gi 57650036 ref NC_002951.2 :1890533-1891442 | MVR | MR150 | OK     | 141.877 | 135.413 | -0.0672736 | 0.081944  | 0.93469 | 0.999883 |
| gene1798 | gene1798 | metK      | gi 57650036 ref NC_002951.2 :1891566-1892760 | MVR | MR150 | OK     | 38.0434 | 39.1338 | 0.0407692  | -0.055077 | 0.95608 | 0.999883 |
| gene1799 | gene1799 | pckA      | gi 57650036 ref NC_002951.2 :1893130-1894723 | MVR | MR150 | OK     | 504.593 | 558.994 | 0.147712   | -0.151048 | 0.87994 | 0.999883 |

|          |          |             |                                              |     |       |        |         |         |            |           |         |          |
|----------|----------|-------------|----------------------------------------------|-----|-------|--------|---------|---------|------------|-----------|---------|----------|
| gene18   | gene18   | SACOL_tRNA- | gi 57650036 ref NC_002951.2 :24177-24252     | MVR | MR150 | NOTEST | 0       | 0       | 0          | 0         | 1       | 1        |
| gene180  | gene180  | SACOL0186   | gi 57650036 ref NC_002951.2 :217347-218511   | MVR | MR150 | OK     | 2.98629 | 3.97158 | 0.411359   | -0.578867 | 0.56268 | 0.999883 |
| gene1800 | gene1800 | SACOL1839   | gi 57650036 ref NC_002951.2 :1894858-1895344 | MVR | MR150 | OK     | 103.914 | 114.434 | 0.139128   | -0.192616 | 0.84726 | 0.999883 |
| gene1801 | gene1801 | SACOL1840   | gi 57650036 ref NC_002951.2 :1895718-1896949 | MVR | MR150 | OK     | 10.3684 | 8.84832 | -0.228718  | 0.266543  | 0.78982 | 0.999883 |
| gene1802 | gene1802 | SACOL1841   | gi 57650036 ref NC_002951.2 :1895718-1896949 | MVR | MR150 | OK     | 11.3822 | 12.015  | 0.0780468  | -0.069555 | 0.94455 | 0.999883 |
| gene1803 | gene1803 | SACOL1842   | gi 57650036 ref NC_002951.2 :1897008-1898264 | MVR | MR150 | OK     | 634.836 | 798.797 | 0.331445   | -0.361213 | 0.71794 | 0.999883 |
| gene1804 | gene1804 | SACOL1843   | gi 57650036 ref NC_002951.2 :1897008-1898264 | MVR | MR150 | OK     | 18.0395 | 27.495  | 0.608014   | -0.400314 | 0.68893 | 0.999883 |
| gene1805 | gene1805 | SACOL1844   | gi 57650036 ref NC_002951.2 :1898268-1899747 | MVR | MR150 | OK     | 16.6836 | 20.3573 | 0.287118   | -0.406722 | 0.68421 | 0.999883 |
| gene1806 | gene1806 | SACOL1845   | gi 57650036 ref NC_002951.2 :1899905-1900388 | MVR | MR150 | OK     | 15.5285 | 10.8075 | -0.52288   | 0.740361  | 0.45908 | 0.999883 |
| gene1807 | gene1807 | SACOL1846   | gi 57650036 ref NC_002951.2 :1900663-1901314 | MVR | MR150 | OK     | 145.122 | 143.912 | -0.0120853 | 0.015476  | 0.98765 | 0.999883 |
| gene1808 | gene1808 | SACOL1847   | gi 57650036 ref NC_002951.2 :1901394-1902390 | MVR | MR150 | OK     | 299.055 | 264.325 | -0.178098  | 0.197954  | 0.84308 | 0.999883 |
| gene1809 | gene1809 | SACOL1848   | gi 57650036 ref NC_002951.2 :1902465-1903092 | MVR | MR150 | OK     | 10.5887 | 11.1127 | 0.0696862  | -0.100467 | 0.91997 | 0.999883 |
| gene181  | gene181  | SACOL0187   | gi 57650036 ref NC_002951.2 :218527-220303   | MVR | MR150 | OK     | 3.1656  | 3.30437 | 0.0618978  | -0.089802 | 0.92845 | 0.999883 |
| gene1810 | gene1810 | SACOL1849   | gi 57650036 ref NC_002951.2 :1903132-1903477 | MVR | MR150 | OK     | 10.827  | 10.2899 | -0.0734064 | 0.093372  | 0.92561 | 0.999883 |
| gene1811 | gene1811 | SACOL1850   | gi 57650036 ref NC_002951.2 :1903574-1904126 | MVR | MR150 | OK     | 12.4675 | 7.39066 | -0.754397  | 1.05963   | 0.28931 | 0.975616 |
| gene1812 | gene1812 | SACOL1851   | gi 57650036 ref NC_002951.2 :1904343-1904985 | MVR | MR150 | OK     | 6.4332  | 6.23375 | -0.045436  | 0.062891  | 0.94985 | 0.999883 |
| gene1813 | gene1813 | SACOL1853   | gi 57650036 ref NC_002951.2 :1905285-1905462 | MVR | MR150 | NOTEST | 0       | 0       | 0          | 0         | 1       | 1        |
| gene1814 | gene1814 | SACOL1854   | gi 57650036 ref NC_002951.2 :1905472-1905856 | MVR | MR150 | OK     | 12.8051 | 16.4821 | 0.364175   | -0.499176 | 0.61766 | 0.999883 |
| gene1815 | gene1815 | SACOL1855   | gi 57650036 ref NC_002951.2 :1905957-1906735 | MVR | MR150 | OK     | 9.39313 | 11.3901 | 0.278101   | -0.405723 | 0.68495 | 0.999883 |
| gene1816 | gene1816 | SACOL1857   | gi 57650036 ref NC_002951.2 :1907605-1907983 | MVR | MR150 | OK     | 3.31212 | 7.65471 | 1.20859    | -1.35013  | 0.17697 | 0.821477 |
| gene1817 | gene1817 | SACOL1858   | gi 57650036 ref NC_002951.2 :1908503-1909064 | MVR | MR150 | OK     | 2.08048 | 2.54355 | 0.289928   | -0.326137 | 0.74432 | 0.999883 |
| gene1818 | gene1818 | SACOL1859   | gi 57650036 ref NC_002951.2 :1909268-1912319 | MVR | MR150 | OK     | 1.20007 | 1.88054 | 0.648037   | -0.928946 | 0.35292 | 0.999883 |
| gene1819 | gene1819 | SACOL1860   | gi 57650036 ref NC_002951.2 :1912385-1912616 | MVR | MR150 | NOTEST | 0       | 0       | 0          | 0         | 1       | 1        |
| gene182  | gene182  | ggt         | gi 57650036 ref NC_002951.2 :220340-222347   | MVR | MR150 | OK     | 3.37881 | 3.39064 | 0.0050403  | -0.007367 | 0.99412 | 0.999883 |
| gene1820 | gene1820 | hsdS        | gi 57650036 ref NC_002951.2 :1913465-1916214 | MVR | MR150 | OK     | 6.65114 | 5.9727  | -0.155218  | 0.117265  | 0.90665 | 0.999883 |
| gene1821 | gene1821 | hsdM2       | gi 57650036 ref NC_002951.2 :1913465-1916214 | MVR | MR150 | OK     | 11.2322 | 12.3026 | 0.131318   | -0.158286 | 0.87423 | 0.999883 |
| gene1822 | gene1822 | SACOL1863   | gi 57650036 ref NC_002951.2 :1916377-1916512 | MVR | MR150 | NOTEST | 0       | 0       | 0          | 0         | 1       | 1        |
| gene1823 | gene1823 | SACOL1864   | gi 57650036 ref NC_002951.2 :1916576-1917296 | MVR | MR150 | OK     | 2.12176 | 0.88323 | -1.2644    | 1.35331   | 0.17596 | 0.821477 |
| gene1824 | gene1824 | SACOL1865   | gi 57650036 ref NC_002951.2 :1917446-1918163 | MVR | MR150 | OK     | 0.71155 | 1.18447 | 0.735191   | -0.713803 | 0.47535 | 0.999883 |
| gene1825 | gene1825 | SACOL1866   | gi 57650036 ref NC_002951.2 :1918320-1919040 | MVR | MR150 | OK     | 1.06088 | 0.58882 | -0.849365  | 0.786232  | 0.43173 | 0.999883 |
| gene1826 | gene1826 | splC        | gi 57650036 ref NC_002951.2 :1919160-1919880 | MVR | MR150 | NOTEST | 0.943   | 0.58882 | -0.67944   | 0.620463  | 0.53495 | 1        |
| gene1827 | gene1827 | splB        | gi 57650036 ref NC_002951.2 :1919937-1920660 | MVR | MR150 | OK     | 1.17167 | 0.29272 | -2.00097   | 1.48223   | 0.13828 | 0.733494 |
| gene1828 | gene1828 | splA        | gi 57650036 ref NC_002951.2 :1920784-1921501 | MVR | MR150 | OK     | 2.01607 | 0.59223 | -1.76731   | 1.73343   | 0.08302 | 0.574038 |

|          |          |             |                                              |     |       |        |         |         |             |             |         |          |
|----------|----------|-------------|----------------------------------------------|-----|-------|--------|---------|---------|-------------|-------------|---------|----------|
| gene1829 | gene1829 | SACOL1870   | gi 57650036 ref NC_002951.2 :1922464-1923031 | MVR | MR150 | OK     | 1.87389 | 1.25102 | -0.582932   | 0.594541    | 0.55215 | 0.999883 |
| gene183  | gene183  | SACOL0189   | gi 57650036 ref NC_002951.2 :222644-223418   | MVR | MR150 | NOTEST | 0       | 0       | 0           | 0           | 1       | 1        |
| gene1830 | gene1830 | epiG        | gi 57650036 ref NC_002951.2 :1923504-1925650 | MVR | MR150 | OK     | 15.0162 | 12.8852 | -0.220808   | 0.180765    | 0.85655 | 0.999883 |
| gene1831 | gene1831 | epiE        | gi 57650036 ref NC_002951.2 :1923504-1925650 | MVR | MR150 | OK     | 14.3455 | 8.7175  | -0.71861    | 0.558426    | 0.57655 | 0.999883 |
| gene1832 | gene1832 | epiF        | gi 57650036 ref NC_002951.2 :1923504-1925650 | MVR | MR150 | OK     | 16.2054 | 15.526  | -0.0617884  | 0.053584    | 0.95727 | 0.999883 |
| gene1833 | gene1833 | epiP        | gi 57650036 ref NC_002951.2 :1925672-1927046 | MVR | MR150 | OK     | 4.9839  | 3.65275 | -0.448291   | 0.649139    | 0.51625 | 0.999883 |
| gene1834 | gene1834 | epiD        | gi 57650036 ref NC_002951.2 :1927055-1927574 | MVR | MR150 | NOTEST | 0.39578 | 0.95922 | 1.27718     | -0.813377   | 0.416   | 1        |
| gene1835 | gene1835 | epiC        | gi 57650036 ref NC_002951.2 :1927589-1931820 | MVR | MR150 | NOTEST | 0.91648 | 0.58622 | -0.644672   | 0.574642    | 0.56553 | 1        |
| gene1836 | gene1836 | epiB        | gi 57650036 ref NC_002951.2 :1927589-1931820 | MVR | MR150 | NOTEST | 0.42233 | 0.16448 | -1.36048    | 1.15113     | 0.24968 | 1        |
| gene1837 | gene1837 | epiA        | gi 57650036 ref NC_002951.2 :1931884-1932028 | MVR | MR150 | OK     | 0       | 37.5783 | 1.79769e+30 | 1.79769e+30 | 0.10824 | 0.653986 |
| gene1838 | gene1838 | SACOL1879   | gi 57650036 ref NC_002951.2 :1932919-1934239 | MVR | MR150 | OK     | 1.01386 | 0.68372 | -0.568394   | 0.658674    | 0.51011 | 0.999883 |
| gene1839 | gene1839 | lukD        | gi 57650036 ref NC_002951.2 :1934670-1935654 | MVR | MR150 | OK     | 2.53915 | 1.56255 | -0.700441   | 0.894473    | 0.37107 | 0.999883 |
| gene184  | gene184  | acpD        | gi 57650036 ref NC_002951.2 :223607-224234   | MVR | MR150 | OK     | 39.4537 | 56.639  | 0.521632    | -0.746887   | 0.45513 | 0.999883 |
| gene1840 | gene1840 | lukE        | gi 57650036 ref NC_002951.2 :1935655-1936591 | MVR | MR150 | OK     | 1.47833 | 0.62415 | -1.24399    | 1.33146     | 0.18304 | 0.831533 |
| gene1841 | gene1841 | SACOL1882   | gi 57650036 ref NC_002951.2 :1937390-1937930 | MVR | MR150 | OK     | 4.06628 | 2.25029 | -0.853603   | 1.00181     | 0.31643 | 0.999883 |
| gene1842 | gene1842 | SACOL1883   | gi 57650036 ref NC_002951.2 :1937942-1938731 | MVR | MR150 | OK     | 21.4218 | 21.8351 | 0.0275709   | -0.040351   | 0.96781 | 0.999883 |
| gene1843 | gene1843 | SACOL_tRNA- | gi 57650036 ref NC_002951.2 :1939973-1940062 | MVR | MR150 | NOTEST | 0       | 0       | 0           | 0           | 1       | 1        |
| gene1844 | gene1844 | SACOL_tRNA- | gi 57650036 ref NC_002951.2 :1940116-1940188 | MVR | MR150 | NOTEST | 0       | 0       | 0           | 0           | 1       | 1        |
| gene1845 | gene1845 | SACOL_tRNA- | gi 57650036 ref NC_002951.2 :1940189-1940264 | MVR | MR150 | NOTEST | 0       | 0       | 0           | 0           | 1       | 1        |
| gene1846 | gene1846 | SACOL_tRNA- | gi 57650036 ref NC_002951.2 :1940278-1940352 | MVR | MR150 | NOTEST | 0       | 0       | 0           | 0           | 1       | 1        |
| gene1847 | gene1847 | SACOL_tRNA- | gi 57650036 ref NC_002951.2 :1940367-1940443 | MVR | MR150 | NOTEST | 0       | 0       | 0           | 0           | 1       | 1        |
| gene1849 | gene1849 | SACOL_tRNA- | gi 57650036 ref NC_002951.2 :1940545-1940621 | MVR | MR150 | NOTEST | 0       | 0       | 0           | 0           | 1       | 1        |
| gene185  | gene185  | SACOL0191   | gi 57650036 ref NC_002951.2 :224442-225021   | MVR | MR150 | OK     | 13.4985 | 9.2879  | -0.539375   | 0.772407    | 0.43987 | 0.999883 |
| gene1850 | gene1850 | SACOL_tRNA- | gi 57650036 ref NC_002951.2 :1940642-1940716 | MVR | MR150 | NOTEST | 0       | 0       | 0           | 0           | 1       | 1        |
| gene1851 | gene1851 | SACOL1885   | gi 57650036 ref NC_002951.2 :1941187-1941742 | MVR | MR150 | OK     | 9.00155 | 12.0702 | 0.4232      | -0.599604   | 0.54877 | 0.999883 |
| gene1852 | gene1852 | SACOL1886   | gi 57650036 ref NC_002951.2 :1941835-1942063 | MVR | MR150 | OK     | 35.684  | 15.218  | -1.22949    | 1.46145     | 0.14389 | 0.743774 |
| gene1853 | gene1853 | hemG        | gi 57650036 ref NC_002951.2 :1942064-1943465 | MVR | MR150 | OK     | 25.4909 | 27.4176 | 0.105121    | -0.144828   | 0.88485 | 0.999883 |
| gene1854 | gene1854 | hemH        | gi 57650036 ref NC_002951.2 :1943488-1944412 | MVR | MR150 | OK     | 27.0659 | 32.1476 | 0.248237    | -0.354554   | 0.72292 | 0.999883 |
| gene1855 | gene1855 | hemE        | gi 57650036 ref NC_002951.2 :1944469-1945607 | MVR | MR150 | OK     | 16.308  | 20.4667 | 0.327703    | -0.476308   | 0.63386 | 0.999883 |
| gene1856 | gene1856 | SACOL1890   | gi 57650036 ref NC_002951.2 :1944469-1945607 | MVR | MR150 | NOTEST | 0       | 0       | 0           | 0           | 1       | 1        |
| gene1857 | gene1857 | SACOL1891   | gi 57650036 ref NC_002951.2 :1945769-1946273 | MVR | MR150 | OK     | 79.1857 | 72.4607 | -0.128041   | 0.182288    | 0.85536 | 0.999883 |
| gene1858 | gene1858 | SACOL1892   | gi 57650036 ref NC_002951.2 :1946396-1948353 | MVR | MR150 | OK     | 65.091  | 59.8233 | -0.121752   | 0.115203    | 0.90829 | 0.999883 |
| gene1859 | gene1859 | SACOL1893   | gi 57650036 ref NC_002951.2 :1946396-1948353 | MVR | MR150 | OK     | 72.4907 | 77.822  | 0.102383    | -0.076816   | 0.93877 | 0.999883 |



|          |          |             |                                              |     |       |        |         |         |            |           |         |          |
|----------|----------|-------------|----------------------------------------------|-----|-------|--------|---------|---------|------------|-----------|---------|----------|
| gene186  | gene186  | SACOL0192   | gi 57650036 ref NC_002951.2 :225403-226501   | MVR | MR150 | OK     | 1.60586 | 0.5116  | -1.65025   | 1.80403   | 0.07123 | 0.523314 |
| gene1860 | gene1860 | SACOL1894   | gi 57650036 ref NC_002951.2 :1948486-1948909 | MVR | MR150 | OK     | 64.8242 | 96.448  | 0.57322    | -0.827585 | 0.40791 | 0.999883 |
| gene1861 | gene1861 | SACOL1895   | gi 57650036 ref NC_002951.2 :1949050-1949416 | MVR | MR150 | OK     | 131.93  | 150.792 | 0.192787   | -0.274026 | 0.78407 | 0.999883 |
| gene1862 | gene1862 | SACOL1896   | gi 57650036 ref NC_002951.2 :1950148-1950706 | MVR | MR150 | OK     | 5.07277 | 6.41207 | 0.338015   | -0.449286 | 0.65323 | 0.999883 |
| gene1863 | gene1863 | SACOL1897   | gi 57650036 ref NC_002951.2 :1950910-1951873 | MVR | MR150 | OK     | 58.3186 | 48.9689 | -0.252089  | 0.338511  | 0.73498 | 0.999883 |
| gene1864 | gene1864 | cbf1        | gi 57650036 ref NC_002951.2 :1951993-1957054 | MVR | MR150 | OK     | 151.484 | 133.108 | -0.186568  | 0.097002  | 0.92273 | 0.999883 |
| gene1865 | gene1865 | SACOL1899   | gi 57650036 ref NC_002951.2 :1951993-1957054 | MVR | MR150 | OK     | 91.9755 | 88.7084 | -0.0521785 | 0.041817  | 0.96664 | 0.999883 |
| gene1866 | gene1866 | SACOL1900   | gi 57650036 ref NC_002951.2 :1951993-1957054 | MVR | MR150 | OK     | 66.3558 | 76.189  | 0.19936    | -0.085066 | 0.93221 | 0.999883 |
| gene1867 | gene1867 | SACOL1902   | gi 57650036 ref NC_002951.2 :1957825-1958170 | MVR | MR150 | OK     | 640.597 | 786.146 | 0.295382   | -0.358804 | 0.71974 | 0.999883 |
| gene1868 | gene1868 | SACOL1903   | gi 57650036 ref NC_002951.2 :1958238-1959363 | MVR | MR150 | OK     | 22.8471 | 24.8338 | 0.120293   | -0.171461 | 0.86386 | 0.999883 |
| gene1869 | gene1869 | SACOL1904   | gi 57650036 ref NC_002951.2 :1959541-1960006 | MVR | MR150 | OK     | 73.9117 | 111.907 | 0.598428   | -0.845985 | 0.39756 | 0.999883 |
| gene187  | gene187  | SACOL0193   | gi 57650036 ref NC_002951.2 :226513-227785   | MVR | MR150 | OK     | 2.06477 | 0.71432 | -1.53134   | 1.85993   | 0.06289 | 0.504373 |
| gene1870 | gene1870 | SACOL1905   | gi 57650036 ref NC_002951.2 :1960361-1960985 | MVR | MR150 | OK     | 14.4675 | 19.4945 | 0.430244   | -0.630195 | 0.52857 | 0.999883 |
| gene1871 | gene1871 | SACOL1906   | gi 57650036 ref NC_002951.2 :1961006-1962119 | MVR | MR150 | OK     | 13.2222 | 14.4251 | 0.125612   | -0.183838 | 0.85414 | 0.999883 |
| gene1872 | gene1872 | SACOL1907   | gi 57650036 ref NC_002951.2 :1962281-1963103 | MVR | MR150 | OK     | 78.8097 | 73.3555 | -0.103469  | 0.136909  | 0.8911  | 0.999883 |
| gene1873 | gene1873 | fumC        | gi 57650036 ref NC_002951.2 :1963565-1964951 | MVR | MR150 | OK     | 196.744 | 198.224 | 0.0108083  | -0.011953 | 0.99046 | 0.999883 |
| gene1874 | gene1874 | SACOL1909   | gi 57650036 ref NC_002951.2 :1965146-1965542 | MVR | MR150 | OK     | 41.641  | 41.107  | -0.0186202 | 0.027358  | 0.97817 | 0.999883 |
| gene1875 | gene1875 | SACOL1910   | gi 57650036 ref NC_002951.2 :1965660-1966023 | MVR | MR150 | OK     | 0.80456 | 1.84801 | 1.19969    | -0.764028 | 0.44485 | 0.999883 |
| gene1876 | gene1876 | SACOL1911   | gi 57650036 ref NC_002951.2 :1966318-1966471 | MVR | MR150 | OK     | 698.883 | 569.717 | -0.294805  | 0.422492  | 0.67267 | 0.999883 |
| gene1877 | gene1877 | SACOL1912   | gi 57650036 ref NC_002951.2 :1966495-1967095 | MVR | MR150 | OK     | 105.859 | 114.029 | 0.10725    | -0.143124 | 0.88619 | 0.999883 |
| gene1878 | gene1878 | SACOL1913   | gi 57650036 ref NC_002951.2 :1967253-1967724 | MVR | MR150 | OK     | 21.9284 | 20.8739 | -0.0711033 | 0.103585  | 0.9175  | 0.999883 |
| gene1879 | gene1879 | SACOL1914   | gi 57650036 ref NC_002951.2 :1967728-1968856 | MVR | MR150 | OK     | 33.8335 | 35.9751 | 0.0885478  | -0.121786 | 0.90307 | 0.999883 |
| gene188  | gene188  | SACOL0194   | gi 57650036 ref NC_002951.2 :227787-229056   | MVR | MR150 | OK     | 2.91017 | 1.28938 | -1.17442   | 1.55435   | 0.1201  | 0.688173 |
| gene1880 | gene1880 | SACOL1915   | gi 57650036 ref NC_002951.2 :1969006-1971179 | MVR | MR150 | OK     | 26.3969 | 27.204  | 0.04345    | -0.036483 | 0.9709  | 0.999883 |
| gene1881 | gene1881 | SACOL1916   | gi 57650036 ref NC_002951.2 :1969006-1971179 | MVR | MR150 | OK     | 17.394  | 18.5056 | 0.0893714  | -0.095317 | 0.92406 | 0.999883 |
| gene1882 | gene1882 | SACOL1917   | gi 57650036 ref NC_002951.2 :1971436-1972498 | MVR | MR150 | OK     | 49.4772 | 47.7887 | -0.050095  | 0.067063  | 0.94653 | 0.999883 |
| gene1883 | gene1883 | SACOL1918   | gi 57650036 ref NC_002951.2 :1972990-1974310 | MVR | MR150 | OK     | 1.01386 | 0.13674 | -2.89032   | 2.21372   | 0.02685 | 0.309278 |
| gene1884 | gene1884 | SACOL_tRNA- | gi 57650036 ref NC_002951.2 :1974496-1974580 | MVR | MR150 | NOTEST | 0       | 0       | 0          | 0         | 1       | 1        |
| gene1885 | gene1885 | SACOL_tRNA- | gi 57650036 ref NC_002951.2 :1974796-1974871 | MVR | MR150 | NOTEST | 0       | 0       | 0          | 0         | 1       | 1        |
| gene1886 | gene1886 | SACOL_tRNA- | gi 57650036 ref NC_002951.2 :1974878-1974952 | MVR | MR150 | NOTEST | 0       | 0       | 0          | 0         | 1       | 1        |
| gene1887 | gene1887 | SACOL_tRNA- | gi 57650036 ref NC_002951.2 :1974957-1975029 | MVR | MR150 | NOTEST | 0       | 0       | 0          | 0         | 1       | 1        |
| gene1888 | gene1888 | SACOL_tRNA- | gi 57650036 ref NC_002951.2 :1975040-1975113 | MVR | MR150 | NOTEST | 0       | 0       | 0          | 0         | 1       | 1        |
| gene1889 | gene1889 | SACOL_tRNA- | gi 57650036 ref NC_002951.2 :1975115-1975189 | MVR | MR150 | NOTEST | 0       | 0       | 0          | 0         | 1       | 1        |

|          |          |             |                                              |     |       |        |         |         |            |           |         |          |
|----------|----------|-------------|----------------------------------------------|-----|-------|--------|---------|---------|------------|-----------|---------|----------|
| gene189  | gene189  | SACOL0195   | gi 57650036 ref NC_002951.2 :229057-229897   | MVR | MR150 | OK     | 2.65784 | 1.43544 | -0.888761  | 1.08692   | 0.27707 | 0.9631   |
| gene1890 | gene1890 | SACOL_tRNA- | gi 57650036 ref NC_002951.2 :1975204-1975285 | MVR | MR150 | NOTEST | 0       | 0       | 0          | 0         | 1       | 1        |
| gene1891 | gene1891 | SACOL_tRNA- | gi 57650036 ref NC_002951.2 :1975290-1975366 | MVR | MR150 | NOTEST | 0       | 0       | 0          | 0         | 1       | 1        |
| gene1892 | gene1892 | SACOL_tRNA- | gi 57650036 ref NC_002951.2 :1975373-1975446 | MVR | MR150 | NOTEST | 0       | 0       | 0          | 0         | 1       | 1        |
| gene1893 | gene1893 | SACOL_tRNA- | gi 57650036 ref NC_002951.2 :1975464-1975540 | MVR | MR150 | NOTEST | 0       | 0       | 0          | 0         | 1       | 1        |
| gene1894 | gene1894 | SACOL_tRNA- | gi 57650036 ref NC_002951.2 :1975549-1975623 | MVR | MR150 | NOTEST | 0       | 0       | 0          | 0         | 1       | 1        |
| gene1896 | gene1896 | SACOL_tRNA- | gi 57650036 ref NC_002951.2 :1975768-1975844 | MVR | MR150 | NOTEST | 0       | 0       | 0          | 0         | 1       | 1        |
| gene1898 | gene1898 | SACOL_tRNA- | gi 57650036 ref NC_002951.2 :1975953-1976027 | MVR | MR150 | NOTEST | 0       | 0       | 0          | 0         | 1       | 1        |
| gene19   | gene19   | SACOL_tRNA- | gi 57650036 ref NC_002951.2 :24259-24332     | MVR | MR150 | NOTEST | 0       | 0       | 0          | 0         | 1       | 1        |
| gene190  | gene190  | SACOL0196   | gi 57650036 ref NC_002951.2 :229970-231047   | MVR | MR150 | OK     | 2.46808 | 1.74616 | -0.499203  | 0.654495  | 0.51279 | 0.999883 |
| gene1905 | gene1905 | SACOL_tRNA- | gi 57650036 ref NC_002951.2 :1976595-1976677 | MVR | MR150 | NOTEST | 0       | 0       | 0          | 0         | 1       | 1        |
| gene1906 | gene1906 | SACOL_tRNA- | gi 57650036 ref NC_002951.2 :1976680-1976756 | MVR | MR150 | NOTEST | 0       | 0       | 0          | 0         | 1       | 1        |
| gene1907 | gene1907 | SACOL_tRNA- | gi 57650036 ref NC_002951.2 :1976761-1976837 | MVR | MR150 | NOTEST | 0       | 0       | 0          | 0         | 1       | 1        |
| gene1908 | gene1908 | SACOL_tRNA- | gi 57650036 ref NC_002951.2 :1976853-1976929 | MVR | MR150 | NOTEST | 0       | 0       | 0          | 0         | 1       | 1        |
| gene1909 | gene1909 | rrfD        | gi 57650036 ref NC_002951.2 :1976940-1977055 | MVR | MR150 | OK     | 776204  | 277239  | -1.48531   | 1.71176   | 0.08694 | 0.59079  |
| gene191  | gene191  | SACOL0197   | gi 57650036 ref NC_002951.2 :231071-232112   | MVR | MR150 | OK     | 2.43364 | 1.63878 | -0.570489  | 0.738281  | 0.46034 | 0.999883 |
| gene1910 | gene1910 | rrlD        | gi 57650036 ref NC_002951.2 :1977127-1980050 | MVR | MR150 | HIDATA | 0       | 36607.2 | 0          | 0         | 1       | 1        |
| gene1913 | gene1913 | rrsD        | gi 57650036 ref NC_002951.2 :1980523-1982078 | MVR | MR150 | OK     | 10090.9 | 14328.8 | 0.505859   | -0.713496 | 0.47554 | 0.999883 |
| gene1914 | gene1914 | SACOL1919   | gi 57650036 ref NC_002951.2 :1982817-1983264 | MVR | MR150 | OK     | 805.323 | 877.637 | 0.124056   | -0.139375 | 0.88915 | 0.999883 |
| gene1915 | gene1915 | SACOL1920   | gi 57650036 ref NC_002951.2 :1983360-1984311 | MVR | MR150 | OK     | 38.1263 | 38.9444 | 0.0306288  | -0.042626 | 0.966   | 0.999883 |
| gene1916 | gene1916 | bcp         | gi 57650036 ref NC_002951.2 :1984316-1984772 | MVR | MR150 | OK     | 77.7159 | 60.2925 | -0.366231  | 0.530158  | 0.596   | 0.999883 |
| gene1917 | gene1917 | hemL2       | gi 57650036 ref NC_002951.2 :1984852-1986142 | MVR | MR150 | OK     | 88.4933 | 100.602 | 0.185018   | -0.223954 | 0.82279 | 0.999883 |
| gene1918 | gene1918 | SACOL1923   | gi 57650036 ref NC_002951.2 :1986434-1987529 | MVR | MR150 | OK     | 40.0162 | 40.8942 | 0.0313109  | -0.042564 | 0.96605 | 0.999883 |
| gene1919 | gene1919 | SACOL1924   | gi 57650036 ref NC_002951.2 :1987719-1989456 | MVR | MR150 | OK     | 20.2949 | 15.4462 | -0.393865  | 0.550636  | 0.58188 | 0.999883 |
| gene192  | gene192  | SACOL0198   | gi 57650036 ref NC_002951.2 :232166-233135   | MVR | MR150 | OK     | 2.90423 | 1.99127 | -0.544464  | 0.715059  | 0.47457 | 0.999883 |
| gene1920 | gene1920 | SACOL1925   | gi 57650036 ref NC_002951.2 :1989746-1990289 | MVR | MR150 | OK     | 58.41   | 64.2426 | 0.137314   | -0.196644 | 0.84411 | 0.999883 |
| gene1921 | gene1921 | mutY        | gi 57650036 ref NC_002951.2 :1990590-1991628 | MVR | MR150 | OK     | 8.18991 | 10.4161 | 0.346896   | -0.509263 | 0.61057 | 0.999883 |
| gene1922 | gene1922 | SACOL1927   | gi 57650036 ref NC_002951.2 :1991779-1992757 | MVR | MR150 | OK     | 126.571 | 165.726 | 0.388852   | -0.465769 | 0.64138 | 0.999883 |
| gene1923 | gene1923 | SACOL1928   | gi 57650036 ref NC_002951.2 :1993017-1993854 | MVR | MR150 | OK     | 32.7178 | 27.8825 | -0.230718  | 0.331962  | 0.73992 | 0.999883 |
| gene1924 | gene1924 | SACOL1929   | gi 57650036 ref NC_002951.2 :1993862-1995380 | MVR | MR150 | OK     | 20.0227 | 24.752  | 0.305908   | -0.424666 | 0.67108 | 0.999883 |
| gene1925 | gene1925 | SACOL1930   | gi 57650036 ref NC_002951.2 :1995394-1996505 | MVR | MR150 | OK     | 31.2126 | 34.0239 | 0.124421   | -0.103649 | 0.91745 | 0.999883 |
| gene1926 | gene1926 | recX        | gi 57650036 ref NC_002951.2 :1995394-1996505 | MVR | MR150 | OK     | 12.8736 | 12.3676 | -0.0578498 | 0.069634  | 0.94449 | 0.999883 |
| gene1927 | gene1927 | SACOL1932   | gi 57650036 ref NC_002951.2 :1996765-1997575 | MVR | MR150 | OK     | 70.6443 | 63.5027 | -0.153757  | 0.206509  | 0.83639 | 0.999883 |

|          |          |           |                                              |     |       |        |         |         |            |           |         |          |
|----------|----------|-----------|----------------------------------------------|-----|-------|--------|---------|---------|------------|-----------|---------|----------|
| gene1928 | gene1928 | SACOL1933 | gi 57650036 ref NC_002951.2 :1997915-1998431 | MVR | MR150 | OK     | 58.1717 | 66.8126 | 0.199805   | -0.28725  | 0.77392 | 0.999883 |
| gene1929 | gene1929 | SACOL1934 | gi 57650036 ref NC_002951.2 :1998561-1998723 | MVR | MR150 | OK     | 12.8485 | 30.2084 | 1.23336    | -0.785468 | 0.43218 | 0.999883 |
| gene193  | gene193  | SACOL0199 | gi 57650036 ref NC_002951.2 :233495-234068   | MVR | MR150 | OK     | 3.85102 | 4.51339 | 0.228968   | -0.292283 | 0.77007 | 0.999883 |
| gene1930 | gene1930 | SACOL1935 | gi 57650036 ref NC_002951.2 :1998946-2000098 | MVR | MR150 | OK     | 13.2969 | 12.7083 | -0.0653191 | 0.095653  | 0.9238  | 0.999883 |
| gene1931 | gene1931 | SACOL1936 | gi 57650036 ref NC_002951.2 :2000357-2000888 | MVR | MR150 | OK     | 89.0195 | 78.123  | -0.188374  | 0.263888  | 0.79187 | 0.999883 |
| gene1932 | gene1932 | pepS      | gi 57650036 ref NC_002951.2 :2000977-2002234 | MVR | MR150 | OK     | 40.9324 | 34.7737 | -0.235247  | 0.316483  | 0.75164 | 0.999883 |
| gene1933 | gene1933 | SACOL1938 | gi 57650036 ref NC_002951.2 :2002236-2002443 | MVR | MR150 | OK     | 17.584  | 25.9997 | 0.56423    | -0.609719 | 0.54205 | 0.999883 |
| gene1934 | gene1934 | SACOL1939 | gi 57650036 ref NC_002951.2 :2002583-2003048 | MVR | MR150 | OK     | 42.5113 | 27.6884 | -0.618566  | 0.908569  | 0.36358 | 0.999883 |
| gene1935 | gene1935 | SACOL1940 | gi 57650036 ref NC_002951.2 :2003054-2003330 | MVR | MR150 | OK     | 256.905 | 187.863 | -0.451554  | 0.651537  | 0.5147  | 0.999883 |
| gene1936 | gene1936 | SACOL1941 | gi 57650036 ref NC_002951.2 :2003607-2004825 | MVR | MR150 | OK     | 11.7082 | 10.5308 | -0.152917  | 0.22436   | 0.82248 | 0.999883 |
| gene1937 | gene1937 | vraR      | gi 57650036 ref NC_002951.2 :2004940-2007301 | MVR | MR150 | OK     | 28.2201 | 25.6302 | -0.138877  | 0.106753  | 0.91499 | 0.999883 |
| gene1938 | gene1938 | vraS      | gi 57650036 ref NC_002951.2 :2004940-2007301 | MVR | MR150 | OK     | 18.8274 | 18.6883 | -0.0106937 | 0.009688  | 0.99227 | 0.999883 |
| gene1939 | gene1939 | SACOL1944 | gi 57650036 ref NC_002951.2 :2004940-2007301 | MVR | MR150 | OK     | 16.5121 | 17.6876 | 0.0992138  | -0.065807 | 0.94753 | 0.999883 |
| gene194  | gene194  | uhpT      | gi 57650036 ref NC_002951.2 :234222-235602   | MVR | MR150 | OK     | 9.05602 | 8.04713 | -0.170402  | 0.250417  | 0.80227 | 0.999883 |
| gene1940 | gene1940 | SACOL1945 | gi 57650036 ref NC_002951.2 :2007315-2007702 | MVR | MR150 | OK     | 9.095   | 5.6802  | -0.679131  | 0.840894  | 0.40041 | 0.999883 |
| gene1941 | gene1941 | SACOL1946 | gi 57650036 ref NC_002951.2 :2007918-2008677 | MVR | MR150 | OK     | 97.5933 | 116.674 | 0.257631   | -0.332822 | 0.73927 | 0.999883 |
| gene1942 | gene1942 | SACOL1947 | gi 57650036 ref NC_002951.2 :2009204-2010191 | MVR | MR150 | OK     | 9.0437  | 12.6474 | 0.483852   | -0.710389 | 0.47746 | 0.999883 |
| gene1943 | gene1943 | SACOL1948 | gi 57650036 ref NC_002951.2 :2010621-2011035 | MVR | MR150 | OK     | 3.64439 | 0.71217 | -2.35539   | 1.76432   | 0.07768 | 0.554396 |
| gene1944 | gene1944 | SACOL1949 | gi 57650036 ref NC_002951.2 :2011063-2011174 | MVR | MR150 | NOTEST | 0       | 0       | 0          | 0         | 1       | 1        |
| gene1945 | gene1945 | SACOL1950 | gi 57650036 ref NC_002951.2 :2011259-2011991 | MVR | MR150 | OK     | 69.4007 | 61.2957 | -0.179166  | 0.24489   | 0.80654 | 0.999883 |
| gene1946 | gene1946 | SACOL1951 | gi 57650036 ref NC_002951.2 :2011992-2013306 | MVR | MR150 | OK     | 47.8065 | 48.2553 | 0.0134805  | -0.017605 | 0.98595 | 0.999883 |
| gene1947 | gene1947 | SACOL1952 | gi 57650036 ref NC_002951.2 :2013597-2014098 | MVR | MR150 | OK     | 187.026 | 203.279 | 0.120217   | -0.155912 | 0.8761  | 0.999883 |
| gene1948 | gene1948 | SACOL1953 | gi 57650036 ref NC_002951.2 :2014179-2014272 | MVR | MR150 | NOTEST | 0       | 0       | 0          | 0         | 1       | 1        |
| gene1949 | gene1949 | SACOL1954 | gi 57650036 ref NC_002951.2 :2014486-2015041 | MVR | MR150 | OK     | 57.8923 | 63.7994 | 0.140172   | -0.200357 | 0.8412  | 0.999883 |
| gene195  | gene195  | SACOL0201 | gi 57650036 ref NC_002951.2 :235960-239233   | MVR | MR150 | OK     | 7.5408  | 6.84707 | -0.139231  | 0.107273  | 0.91457 | 0.999883 |
| gene1950 | gene1950 | dinP      | gi 57650036 ref NC_002951.2 :2015108-2016179 | MVR | MR150 | OK     | 22.0938 | 22.8564 | 0.0489526  | -0.070357 | 0.94391 | 0.999883 |
| gene1951 | gene1951 | SACOL1956 | gi 57650036 ref NC_002951.2 :2016425-2016956 | MVR | MR150 | OK     | 65.2429 | 52.2361 | -0.320774  | 0.461829  | 0.6442  | 0.999883 |
| gene1952 | gene1952 | SACOL1957 | gi 57650036 ref NC_002951.2 :2017125-2018487 | MVR | MR150 | OK     | 11.2549 | 10.9396 | -0.0409963 | 0.059965  | 0.95218 | 0.999883 |
| gene1953 | gene1953 | SACOL1958 | gi 57650036 ref NC_002951.2 :2018567-2019515 | MVR | MR150 | OK     | 39.5766 | 35.8251 | -0.143675  | 0.200486  | 0.8411  | 0.999883 |
| gene1954 | gene1954 | gatB      | gi 57650036 ref NC_002951.2 :2020283-2021711 | MVR | MR150 | OK     | 112.259 | 134.075 | 0.256211   | -0.296646 | 0.76674 | 0.999883 |
| gene1955 | gene1955 | gatA      | gi 57650036 ref NC_002951.2 :2021723-2023181 | MVR | MR150 | OK     | 61.5188 | 79.6227 | 0.372152   | -0.45883  | 0.64636 | 0.999883 |
| gene1956 | gene1956 | gatC      | gi 57650036 ref NC_002951.2 :2023182-2023485 | MVR | MR150 | OK     | 84.481  | 121.481 | 0.524034   | -0.767798 | 0.44261 | 0.999883 |
| gene1957 | gene1957 | SACOL1963 | gi 57650036 ref NC_002951.2 :2023852-2025391 | MVR | MR150 | OK     | 124.445 | 123.764 | -0.0079125 | 0.009063  | 0.99277 | 0.999883 |

|          |          |           |                                              |     |       |        |         |         |            |           |         |          |
|----------|----------|-----------|----------------------------------------------|-----|-------|--------|---------|---------|------------|-----------|---------|----------|
| gene1958 | gene1958 | camS      | gi 57650036 ref NC_002951.2 :2025479-2026679 | MVR | MR150 | OK     | 90.9588 | 89.5905 | -0.0218676 | 0.026897  | 0.97854 | 0.999883 |
| gene1959 | gene1959 | ligA      | gi 57650036 ref NC_002951.2 :2026691-2028695 | MVR | MR150 | OK     | 42.4213 | 45.1705 | 0.0905895  | -0.113161 | 0.9099  | 0.999883 |
| gene196  | gene196  | SACOL0202 | gi 57650036 ref NC_002951.2 :235960-239233   | MVR | MR150 | OK     | 5.13347 | 4.06324 | -0.337306  | 0.324581  | 0.7455  | 0.999883 |
| gene1960 | gene1960 | pcrA      | gi 57650036 ref NC_002951.2 :2028698-2031580 | MVR | MR150 | OK     | 32.2009 | 30.8195 | -0.0632595 | 0.073807  | 0.94116 | 0.999883 |
| gene1961 | gene1961 | SACOL1967 | gi 57650036 ref NC_002951.2 :2028698-2031580 | MVR | MR150 | OK     | 19.4465 | 22.047  | 0.181068   | -0.084525 | 0.93264 | 0.999883 |
| gene1962 | gene1962 | SACOL1968 | gi 57650036 ref NC_002951.2 :2031751-2032054 | MVR | MR150 | OK     | 220.385 | 162.895 | -0.436083  | 0.626122  | 0.53124 | 0.999883 |
| gene1963 | gene1963 | purB      | gi 57650036 ref NC_002951.2 :2032162-2033458 | MVR | MR150 | OK     | 82.1061 | 61.7636 | -0.410734  | 0.513854  | 0.60735 | 0.999883 |
| gene1964 | gene1964 | sspB2     | gi 57650036 ref NC_002951.2 :2034318-2035485 | MVR | MR150 | OK     | 1.61243 | 0.79185 | -1.02593   | 1.21949   | 0.22266 | 0.894222 |
| gene1965 | gene1965 | SACOL1971 | gi 57650036 ref NC_002951.2 :2035515-2035842 | MVR | MR150 | OK     | 6.63535 | 2.31506 | -1.51912   | 1.45824   | 0.14478 | 0.743774 |
| gene1966 | gene1966 | SACOL1972 | gi 57650036 ref NC_002951.2 :2036133-2036890 | MVR | MR150 | OK     | 85.9305 | 78.5602 | -0.129373  | 0.044382  | 0.9646  | 0.999883 |
| gene1967 | gene1967 | SACOL1973 | gi 57650036 ref NC_002951.2 :2036133-2036890 | MVR | MR150 | OK     | 48.1163 | 52.0328 | 0.112894   | -0.156703 | 0.87548 | 0.999883 |
| gene1968 | gene1968 | nadE      | gi 57650036 ref NC_002951.2 :2037160-2039444 | MVR | MR150 | OK     | 50.6494 | 60.309  | 0.251828   | -0.183658 | 0.85428 | 0.999883 |
| gene1969 | gene1969 | SACOL1975 | gi 57650036 ref NC_002951.2 :2037160-2039444 | MVR | MR150 | OK     | 48.1591 | 48.2389 | 0.00238737 | -0.002335 | 0.99814 | 0.999883 |
| gene197  | gene197  | SACOL0203 | gi 57650036 ref NC_002951.2 :235960-239233   | MVR | MR150 | OK     | 4.86654 | 5.57556 | 0.19622    | -0.150926 | 0.88003 | 0.999883 |
| gene1970 | gene1970 | SACOL1976 | gi 57650036 ref NC_002951.2 :2039627-2040704 | MVR | MR150 | OK     | 27.8344 | 26.5416 | -0.0686149 | 0.097207  | 0.92256 | 0.999883 |
| gene1971 | gene1971 | pheA      | gi 57650036 ref NC_002951.2 :2040723-2041518 | MVR | MR150 | OK     | 29.696  | 35.5105 | 0.257976   | -0.370911 | 0.7107  | 0.999883 |
| gene1972 | gene1972 | SACOL1978 | gi 57650036 ref NC_002951.2 :2041542-2041665 | MVR | MR150 | NOTEST | 0       | 0       | 0          | 0         | 1       | 1        |
| gene1973 | gene1973 | SACOL1979 | gi 57650036 ref NC_002951.2 :2041707-2043270 | MVR | MR150 | OK     | 90.5471 | 94.2792 | 0.0582709  | -0.068838 | 0.94512 | 0.999883 |
| gene1974 | gene1974 | SACOL1980 | gi 57650036 ref NC_002951.2 :2043474-2044572 | MVR | MR150 | OK     | 6.75801 | 7.16243 | 0.0838518  | -0.122608 | 0.90242 | 0.999883 |
| gene1975 | gene1975 | SACOL1981 | gi 57650036 ref NC_002951.2 :2044943-2045504 | MVR | MR150 | OK     | 54.4392 | 55.1102 | 0.0176748  | -0.025416 | 0.97972 | 0.999883 |
| gene1976 | gene1976 | ppaC      | gi 57650036 ref NC_002951.2 :2045556-2046486 | MVR | MR150 | OK     | 199.033 | 224.443 | 0.173342   | -0.200317 | 0.84123 | 0.999883 |
| gene1977 | gene1977 | SACOL1983 | gi 57650036 ref NC_002951.2 :2046680-2046854 | MVR | MR150 | NOTEST | 0       | 0       | 0          | 0         | 1       | 1        |
| gene1978 | gene1978 | aldA2     | gi 57650036 ref NC_002951.2 :2046905-2048285 | MVR | MR150 | OK     | 108.571 | 121.745 | 0.165227   | -0.193562 | 0.84652 | 0.999883 |
| gene1979 | gene1979 | SACOL1985 | gi 57650036 ref NC_002951.2 :2048404-2049433 | MVR | MR150 | OK     | 23.682  | 19.0263 | -0.315795  | 0.45633   | 0.64815 | 0.999883 |
| gene198  | gene198  | pflB      | gi 57650036 ref NC_002951.2 :239820-242070   | MVR | MR150 | OK     | 17.1776 | 9.41471 | -0.867544  | 1.21352   | 0.22493 | 0.89446  |
| gene1980 | gene1980 | SACOL1986 | gi 57650036 ref NC_002951.2 :2049702-2050104 | MVR | MR150 | OK     | 16.7841 | 24.1057 | 0.522279   | -0.743407 | 0.45724 | 0.999883 |
| gene1981 | gene1981 | SACOL1987 | gi 57650036 ref NC_002951.2 :2050676-2050850 | MVR | MR150 | OK     | 1039.76 | 1001.64 | -0.0538829 | 0.078405  | 0.93751 | 0.999883 |
| gene1982 | gene1982 | SACOL1988 | gi 57650036 ref NC_002951.2 :2051300-2052341 | MVR | MR150 | OK     | 13.4566 | 16.5699 | 0.300255   | -0.439322 | 0.66043 | 0.999883 |
| gene1983 | gene1983 | SACOL1989 | gi 57650036 ref NC_002951.2 :2052397-2053794 | MVR | MR150 | OK     | 32.6842 | 44.7674 | 0.453855   | -0.500919 | 0.61643 | 0.999883 |
| gene1984 | gene1984 | SACOL1990 | gi 57650036 ref NC_002951.2 :2052397-2053794 | MVR | MR150 | OK     | 31.1363 | 40.6098 | 0.383227   | -0.301947 | 0.76269 | 0.999883 |
| gene1985 | gene1985 | SACOL1991 | gi 57650036 ref NC_002951.2 :2053853-2054378 | MVR | MR150 | OK     | 44.0324 | 42.8409 | -0.0395771 | 0.057775  | 0.95393 | 0.999883 |
| gene1986 | gene1986 | SACOL1992 | gi 57650036 ref NC_002951.2 :2054498-2055062 | MVR | MR150 | OK     | 78.0199 | 92.0756 | 0.238977   | -0.330882 | 0.74073 | 0.999883 |
| gene1987 | gene1987 | SACOL1993 | gi 57650036 ref NC_002951.2 :2055127-2057417 | MVR | MR150 | OK     | 17.8682 | 20.9412 | 0.228948   | -0.196673 | 0.84408 | 0.999883 |

|          |          |           |                                              |     |       |        |         |         |                        |           |          |          |
|----------|----------|-----------|----------------------------------------------|-----|-------|--------|---------|---------|------------------------|-----------|----------|----------|
| gene1988 | gene1988 | SACOL1994 | gi 57650036 ref NC_002951.2 :2055127-2057417 | MVR | MR150 | OK     | 19.3711 | 20.2489 | 0.0639346              | -0.062106 | 0.95048  | 0.999883 |
| gene1989 | gene1989 | SACOL1995 | gi 57650036 ref NC_002951.2 :2055127-2057417 | MVR | MR150 | OK     | 7.80362 | 8.2748  | 0.0845816              | -0.04409  | 0.96483  | 0.999883 |
| gene199  | gene199  | pflA      | gi 57650036 ref NC_002951.2 :242092-242848   | MVR | MR150 | OK     | 13.9577 | 11.2897 | -0.306046              | 0.448637  | 0.65369  | 0.999883 |
| gene1990 | gene1990 | SACOL1996 | gi 57650036 ref NC_002951.2 :2057417-2058691 | MVR | MR150 | OK     | 14.8576 | 17.7946 | 0.260234               | -0.313572 | 0.75385  | 0.999883 |
| gene1991 | gene1991 | SACOL1997 | gi 57650036 ref NC_002951.2 :2057417-2058691 | MVR | MR150 | OK     | 23.8764 | 34.3219 | 0.523542               | -0.418951 | 0.67525  | 0.999883 |
| gene1992 | gene1992 | SACOL1998 | gi 57650036 ref NC_002951.2 :2058954-2059131 | MVR | MR150 | NOTEST | 0       | 0       | 0                      | 0         | 1        | 1        |
| gene1993 | gene1993 | SACOL1999 | gi 57650036 ref NC_002951.2 :2059373-2059472 | MVR | MR150 | NOTEST | 0       | 0       | 0                      | 0         | 1        | 1        |
| gene1994 | gene1994 | SACOL2000 | gi 57650036 ref NC_002951.2 :2059671-2060958 | MVR | MR150 | OK     | 111.355 | 138.498 | 0.314697               | -0.368925 | 0.71218  | 0.999883 |
| gene1995 | gene1995 | map       | gi 57650036 ref NC_002951.2 :2061281-2063337 | MVR | MR150 | OK     | 7.94976 | 5.52941 | -0.523785              | 0.766165  | 0.44358  | 0.999883 |
| gene1996 | gene1996 | hIb       | gi 57650036 ref NC_002951.2 :2063725-2064718 | MVR | MR150 | OK     | 10.7982 | 9.26897 | -0.220312              | 0.323733  | 0.74614  | 0.999883 |
| gene1997 | gene1997 | SACOL2004 | gi 57650036 ref NC_002951.2 :2064955-2065828 | MVR | MR150 | OK     | 1.98216 | 1.36509 | -0.538075              | 0.645875  | 0.51836  | 0.999883 |
| gene1998 | gene1998 | SACOL2006 | gi 57650036 ref NC_002951.2 :2065993-2067049 | MVR | MR150 | OK     | 1.96805 | 0.3578  | -2.45956               | 2.48541   | 0.01294  | 0.195099 |
| gene1999 | gene1999 | SACOL2007 | gi 57650036 ref NC_002951.2 :2067483-2068708 | MVR | MR150 | OK     | 5.84241 | 4.63178 | -0.334996              | 0.486722  | 0.62646  | 0.999883 |
| gene2    | gene2    | SACOL0003 | gi 57650036 ref NC_002951.2 :3696-5051       | MVR | MR150 | OK     | 334.631 | 418.84  | 0.323827               | -0.121    | 0.90369  | 0.999883 |
| gene20   | gene20   | yycF      | gi 57650036 ref NC_002951.2 :24951-25653     | MVR | MR150 | OK     | 103.598 | 97.8915 | -0.0817403             | 0.107507  | 0.91439  | 0.999883 |
| gene200  | gene200  | SACOL0206 | gi 57650036 ref NC_002951.2 :242951-243146   | MVR | MR150 | OK     | 2.50546 | 0       | -1.79769e+3(-1.79769e+ | 0.22252   | 0.89416  |          |
| gene2000 | gene2000 | SACOL2009 | gi 57650036 ref NC_002951.2 :2069079-2069925 | MVR | MR150 | OK     | 1.88015 | 0       | -1.79769e+3(-1.79769e+ | 0.00637   | 0.125174 |          |
| gene2001 | gene2001 | SACOL2010 | gi 57650036 ref NC_002951.2 :2069986-2070898 | MVR | MR150 | OK     | 1.44488 | 0.64518 | -1.16318               | 1.23901   | 0.21534  | 0.89416  |
| gene2002 | gene2002 | SACOL2011 | gi 57650036 ref NC_002951.2 :2071058-2072366 | MVR | MR150 | OK     | 6.47421 | 8.56987 | 0.404568               | -0.594212 | 0.55237  | 0.999883 |
| gene2003 | gene2003 | SACOL2012 | gi 57650036 ref NC_002951.2 :2073218-2073662 | MVR | MR150 | OK     | 12.4072 | 11.8941 | -0.0609241             | 0.084654  | 0.93254  | 0.999883 |
| gene2004 | gene2004 | SACOL2013 | gi 57650036 ref NC_002951.2 :2073767-2074205 | MVR | MR150 | OK     | 4.33817 | 3.84954 | -0.172402              | 0.200642  | 0.84098  | 0.999883 |
| gene2005 | gene2005 | SACOL2014 | gi 57650036 ref NC_002951.2 :2074522-2075113 | MVR | MR150 | OK     | 4.45898 | 2.74011 | -0.70248               | 0.874637  | 0.38177  | 0.999883 |
| gene2006 | gene2006 | SACOL2015 | gi 57650036 ref NC_002951.2 :2075454-2075929 | MVR | MR150 | NOTEST | 0.9284  | 0.556   | -0.739652              | 0.492583  | 0.62231  | 1        |
| gene2007 | gene2007 | groEL     | gi 57650036 ref NC_002951.2 :2076023-2077640 | MVR | MR150 | OK     | 61.2161 | 121.925 | 0.994013               | -1.17808  | 0.23877  | 0.9107   |
| gene2008 | gene2008 | groES     | gi 57650036 ref NC_002951.2 :2077715-2078000 | MVR | MR150 | OK     | 16.4148 | 36.8713 | 1.1675                 | -1.55032  | 0.12106  | 0.691506 |
| gene2009 | gene2009 | SACOL2018 | gi 57650036 ref NC_002951.2 :2078174-2078918 | MVR | MR150 | OK     | 29.2338 | 33.4901 | 0.196096               | -0.283932 | 0.77646  | 0.999883 |
| gene201  | gene201  | SACOL0207 | gi 57650036 ref NC_002951.2 :243183-244947   | MVR | MR150 | OK     | 4.44358 | 4.79871 | 0.110926               | -0.162804 | 0.87067  | 0.999883 |
| gene2010 | gene2010 | SACOL2019 | gi 57650036 ref NC_002951.2 :2078942-2080202 | MVR | MR150 | OK     | 85.5794 | 79.0309 | -0.114847              | 0.141845  | 0.8872   | 0.999883 |
| gene2011 | gene2011 | SACOL2020 | gi 57650036 ref NC_002951.2 :2080398-2081025 | MVR | MR150 | OK     | 92.9774 | 112.202 | 0.271153               | -0.362096 | 0.71728  | 0.999883 |
| gene2012 | gene2012 | SACOL2021 | gi 57650036 ref NC_002951.2 :2081385-2082171 | MVR | MR150 | OK     | 46.8176 | 64.7954 | 0.468841               | -0.645022 | 0.51891  | 0.999883 |
| gene2013 | gene2013 | hIb       | gi 57650036 ref NC_002951.2 :2082767-2082902 | MVR | MR150 | OK     | 100.672 | 335.279 | 1.73571                | -1.52542  | 0.12715  | 0.707854 |
| gene2014 | gene2014 | agrB      | gi 57650036 ref NC_002951.2 :2083137-2083844 | MVR | MR150 | OK     | 101.836 | 111.68  | 0.133125               | -0.179399 | 0.85763  | 0.999883 |
| gene2015 | gene2015 | agrD      | gi 57650036 ref NC_002951.2 :2083137-2083844 | MVR | MR150 | OK     | 17.282  | 44.9172 | 1.378                  | -0.088761 | 0.92927  | 0.999883 |

|          |          |             |                                              |     |       |        |         |         |              |              |         |          |
|----------|----------|-------------|----------------------------------------------|-----|-------|--------|---------|---------|--------------|--------------|---------|----------|
| gene2016 | gene2016 | argC2       | gi 57650036 ref NC_002951.2 :2083868-2085161 | MVR | MR150 | OK     | 41.4691 | 49.3222 | 0.2502       | -0.329297    | 0.74193 | 0.999883 |
| gene2017 | gene2017 | agrA        | gi 57650036 ref NC_002951.2 :2085179-2085896 | MVR | MR150 | OK     | 86.3352 | 105.417 | 0.288093     | -0.379702    | 0.70417 | 0.999883 |
| gene2018 | gene2018 | SACOL2028   | gi 57650036 ref NC_002951.2 :2086262-2088703 | MVR | MR150 | OK     | 36.2302 | 39.6924 | 0.131671     | -0.109221    | 0.91303 | 0.999883 |
| gene2019 | gene2019 | cscA        | gi 57650036 ref NC_002951.2 :2086262-2088703 | MVR | MR150 | OK     | 29.6371 | 30.751  | 0.0532269    | -0.051383    | 0.95902 | 0.999883 |
| gene202  | gene202  | SACOL0208   | gi 57650036 ref NC_002951.2 :245110-245455   | MVR | MR150 | OK     | 4.96237 | 3.08696 | -0.684841    | 0.698479     | 0.48488 | 0.999883 |
| gene2020 | gene2020 | scrR        | gi 57650036 ref NC_002951.2 :2088851-2089802 | MVR | MR150 | OK     | 41.022  | 40.1678 | -0.0303584   | 0.04203      | 0.96648 | 0.999883 |
| gene2021 | gene2021 | SACOL2031   | gi 57650036 ref NC_002951.2 :2089984-2091235 | MVR | MR150 | OK     | 1.70836 | 1.31146 | -0.381443    | 0.489449     | 0.62452 | 0.999883 |
| gene2022 | gene2022 | SACOL2033   | gi 57650036 ref NC_002951.2 :2091441-2091666 | MVR | MR150 | OK     | 5.74352 | 12.7327 | 1.14854      | -0.991807    | 0.32129 | 0.999883 |
| gene2023 | gene2023 | SACOL2034   | gi 57650036 ref NC_002951.2 :2091725-2092805 | MVR | MR150 | OK     | 3.68915 | 2.78433 | -0.405955    | 0.56262      | 0.57369 | 0.999883 |
| gene2024 | gene2024 | SACOL2035   | gi 57650036 ref NC_002951.2 :2093108-2093744 | MVR | MR150 | OK     | 78.3212 | 91.6322 | 0.226451     | -0.307615    | 0.75838 | 0.999883 |
| gene2025 | gene2025 | SACOL2036   | gi 57650036 ref NC_002951.2 :2093996-2095925 | MVR | MR150 | OK     | 11.6292 | 11.9595 | 0.0404071    | -0.057901    | 0.95383 | 0.999883 |
| gene2026 | gene2026 | SACOL2037   | gi 57650036 ref NC_002951.2 :2096286-2097897 | MVR | MR150 | OK     | 4.97582 | 5.53601 | 0.153913     | -0.22597     | 0.82123 | 0.999883 |
| gene2027 | gene2027 | SACOL2038   | gi 57650036 ref NC_002951.2 :2097998-2100531 | MVR | MR150 | OK     | 28.583  | 38.9324 | 0.445812     | -0.472604    | 0.6365  | 0.999883 |
| gene2028 | gene2028 | SACOL2039   | gi 57650036 ref NC_002951.2 :2097998-2100531 | MVR | MR150 | OK     | 21.7387 | 27.6884 | 0.349013     | -0.17707     | 0.85945 | 0.999883 |
| gene2029 | gene2029 | SACOL2040   | gi 57650036 ref NC_002951.2 :2097998-2100531 | MVR | MR150 | OK     | 11.852  | 17.5231 | 0.564122     | -0.29268     | 0.76977 | 0.999883 |
| gene203  | gene203  | SACOL0209   | gi 57650036 ref NC_002951.2 :245644-247555   | MVR | MR150 | OK     | 0.9361  | 1.87994 | 1.00595      | -1.35129     | 0.1766  | 0.821477 |
| gene2030 | gene2030 | SACOL2041   | gi 57650036 ref NC_002951.2 :2097998-2100531 | MVR | MR150 | OK     | 12.6431 | 14.9423 | 0.241054     | -0.085944    | 0.93151 | 0.999883 |
| gene2031 | gene2031 | ilvD        | gi 57650036 ref NC_002951.2 :2101068-2102757 | MVR | MR150 | OK     | 3.63302 | 2.77734 | -0.387464    | 0.559568     | 0.57577 | 0.999883 |
| gene2032 | gene2032 | ilvB        | gi 57650036 ref NC_002951.2 :2102784-2104808 | MVR | MR150 | OK     | 4.57766 | 2.92676 | -0.645306    | 0.920372     | 0.35738 | 0.999883 |
| gene2033 | gene2033 | SACOL2044   | gi 57650036 ref NC_002951.2 :2102784-2104808 | MVR | MR150 | OK     | 9.67064 | 0       | -1.79769e+31 | -1.79769e+31 | 0.20473 | 0.877017 |
| gene2034 | gene2034 | ilvC        | gi 57650036 ref NC_002951.2 :2104944-2105949 | MVR | MR150 | OK     | 4.11817 | 5.13611 | 0.318673     | -0.452598    | 0.65084 | 0.999883 |
| gene2035 | gene2035 | leuA        | gi 57650036 ref NC_002951.2 :2105978-2107508 | MVR | MR150 | OK     | 4.79175 | 3.80022 | -0.334469    | 0.487275     | 0.62606 | 0.999883 |
| gene2036 | gene2036 | leuB        | gi 57650036 ref NC_002951.2 :2107510-2108557 | MVR | MR150 | OK     | 5.40025 | 4.70074 | -0.200138    | 0.28734      | 0.77385 | 0.999883 |
| gene2037 | gene2037 | leuC        | gi 57650036 ref NC_002951.2 :2108570-2109941 | MVR | MR150 | OK     | 3.87517 | 2.87737 | -0.42951     | 0.612645     | 0.54011 | 0.999883 |
| gene2038 | gene2038 | leuD        | gi 57650036 ref NC_002951.2 :2109941-2110514 | MVR | MR150 | OK     | 3.68359 | 3.69277 | 0.00359203   | -0.004493    | 0.99642 | 0.999883 |
| gene2039 | gene2039 | ilvA2       | gi 57650036 ref NC_002951.2 :2110528-2111797 | MVR | MR150 | OK     | 3.86157 | 4.01141 | 0.0549226    | -0.078803    | 0.93719 | 0.999883 |
| gene204  | gene204  | SACOL0210   | gi 57650036 ref NC_002951.2 :248020-249342   | MVR | MR150 | NOTEST | 0       | 0       | 0            | 0            | 1       | 1        |
| gene2040 | gene2040 | rrfE        | gi 57650036 ref NC_002951.2 :2112006-2112121 | MVR | MR150 | OK     | 867420  | 414494  | -1.06538     | 1.19461      | 0.23224 | 0.902162 |
| gene2041 | gene2041 | rrfE        | gi 57650036 ref NC_002951.2 :2112193-2115116 | MVR | MR150 | HIDATA | 0       | 44241.6 | 0            | 0            | 1       | 1        |
| gene2042 | gene2042 | rrsE        | gi 57650036 ref NC_002951.2 :2115662-2117217 | MVR | MR150 | OK     | 11237.5 | 16702.6 | 0.571748     | -0.830336    | 0.40635 | 0.999883 |
| gene2043 | gene2043 | SACOL_tRNA- | gi 57650036 ref NC_002951.2 :2117334-2117408 | MVR | MR150 | NOTEST | 0       | 0       | 0            | 0            | 1       | 1        |
| gene2044 | gene2044 | SACOL_tRNA- | gi 57650036 ref NC_002951.2 :2117427-2117513 | MVR | MR150 | NOTEST | 0       | 0       | 0            | 0            | 1       | 1        |
| gene2045 | gene2045 | SACOL2052   | gi 57650036 ref NC_002951.2 :2118159-2120758 | MVR | MR150 | OK     | 22.312  | 26.863  | 0.267801     | -0.093838    | 0.92524 | 0.999883 |

|          |          |           |                                              |     |       |        |         |         |              |              |         |          |
|----------|----------|-----------|----------------------------------------------|-----|-------|--------|---------|---------|--------------|--------------|---------|----------|
| gene2046 | gene2046 | SACOL2053 | gi 57650036 ref NC_002951.2 :2118159-2120758 | MVR | MR150 | OK     | 37.6681 | 34.1522 | -0.141365    | 0.17008      | 0.86495 | 0.999883 |
| gene2047 | gene2047 | rpoF      | gi 57650036 ref NC_002951.2 :2121191-2122416 | MVR | MR150 | OK     | 104.005 | 111.006 | 0.0939921    | -0.107832    | 0.91413 | 0.999883 |
| gene2048 | gene2048 | rsbW      | gi 57650036 ref NC_002951.2 :2121191-2122416 | MVR | MR150 | OK     | 42.1143 | 50.7905 | 0.270249     | -0.140877    | 0.88797 | 0.999883 |
| gene2049 | gene2049 | rsbV      | gi 57650036 ref NC_002951.2 :2122417-2122744 | MVR | MR150 | OK     | 74.5201 | 69.4519 | -0.101615    | 0.149427     | 0.88122 | 0.999883 |
| gene205  | gene205  | SACOL0211 | gi 57650036 ref NC_002951.2 :248020-249342   | MVR | MR150 | OK     | 121.224 | 145.216 | 0.26053      | -0.303069    | 0.76184 | 0.999883 |
| gene2050 | gene2050 | rsbU      | gi 57650036 ref NC_002951.2 :2122863-2123865 | MVR | MR150 | OK     | 62.2361 | 62.6275 | 0.00904418   | -0.011896    | 0.99051 | 0.999883 |
| gene2051 | gene2051 | SACOL2058 | gi 57650036 ref NC_002951.2 :2124214-2124744 | MVR | MR150 | OK     | 95.7431 | 96.0963 | 0.00531209   | -0.007171    | 0.99428 | 0.999883 |
| gene2052 | gene2052 | SACOL2059 | gi 57650036 ref NC_002951.2 :2124214-2124744 | MVR | MR150 | OK     | 113.077 | 216.427 | 0.936571     | -0.463078    | 0.64331 | 0.999883 |
| gene2053 | gene2053 | alr       | gi 57650036 ref NC_002951.2 :2124828-2125977 | MVR | MR150 | OK     | 63.7919 | 69.7132 | 0.128058     | -0.16425     | 0.86953 | 0.999883 |
| gene2054 | gene2054 | acpS      | gi 57650036 ref NC_002951.2 :2126042-2126402 | MVR | MR150 | OK     | 45.4873 | 61.1078 | 0.425895     | -0.624838    | 0.53208 | 0.999883 |
| gene2055 | gene2055 | SACOL2062 | gi 57650036 ref NC_002951.2 :2126405-2128939 | MVR | MR150 | OK     | 36.1575 | 40.961  | 0.179959     | -0.08386     | 0.93317 | 0.999883 |
| gene2056 | gene2056 | SACOL2063 | gi 57650036 ref NC_002951.2 :2126405-2128939 | MVR | MR150 | OK     | 43.263  | 43.1599 | -0.0034422   | 0.003745     | 0.99701 | 0.999883 |
| gene2057 | gene2057 | SACOL2064 | gi 57650036 ref NC_002951.2 :2126405-2128939 | MVR | MR150 | OK     | 29.3662 | 30.0374 | 0.0326038    | -0.013007    | 0.98962 | 0.999883 |
| gene2058 | gene2058 | SACOL2065 | gi 57650036 ref NC_002951.2 :2129034-2129708 | MVR | MR150 | NOTEST | 0       | 0       | 0            | 0            | 1       | 1        |
| gene2059 | gene2059 | kdpC      | gi 57650036 ref NC_002951.2 :2129034-2129708 | MVR | MR150 | OK     | 14.2166 | 9.75027 | -0.544062    | 0.778118     | 0.4365  | 0.999883 |
| gene206  | gene206  | SACOL0212 | gi 57650036 ref NC_002951.2 :249371-251633   | MVR | MR150 | OK     | 110.495 | 127.548 | 0.207053     | -0.227892    | 0.81973 | 0.999883 |
| gene2060 | gene2060 | kdpB      | gi 57650036 ref NC_002951.2 :2129727-2131755 | MVR | MR150 | OK     | 2.95042 | 1.84343 | -0.678526    | 0.972233     | 0.33094 | 0.999883 |
| gene2061 | gene2061 | kdpA      | gi 57650036 ref NC_002951.2 :2131773-2133450 | MVR | MR150 | OK     | 1.48936 | 0.5185  | -1.52227     | 1.84892      | 0.06447 | 0.508201 |
| gene2062 | gene2062 | kdpF      | gi 57650036 ref NC_002951.2 :2133473-2133584 | MVR | MR150 | NOTEST | 0       | 0       | 0            | 0            | 1       | 1        |
| gene2063 | gene2063 | kdpD      | gi 57650036 ref NC_002951.2 :2133721-2137074 | MVR | MR150 | OK     | 2.11475 | 1.49566 | -0.499702    | 0.647016     | 0.51762 | 0.999883 |
| gene2064 | gene2064 | kdpE      | gi 57650036 ref NC_002951.2 :2133721-2137074 | MVR | MR150 | OK     | 4.21142 | 0.92593 | -2.18533     | 1.23801      | 0.21571 | 0.89416  |
| gene2065 | gene2065 | SACOL2072 | gi 57650036 ref NC_002951.2 :2137442-2138963 | MVR | MR150 | OK     | 230.427 | 217.624 | -0.0824719   | 0.089149     | 0.92896 | 0.999883 |
| gene2066 | gene2066 | murF      | gi 57650036 ref NC_002951.2 :2139479-2140838 | MVR | MR150 | OK     | 79.0441 | 76.7753 | -0.0420161   | 0.051667     | 0.95879 | 0.999883 |
| gene2067 | gene2067 | ddl       | gi 57650036 ref NC_002951.2 :2140852-2141923 | MVR | MR150 | OK     | 87.5468 | 83.8653 | -0.0619807   | 0.078014     | 0.93782 | 0.999883 |
| gene2068 | gene2068 | ftsW      | gi 57650036 ref NC_002951.2 :2142240-2143443 | MVR | MR150 | OK     | 58.2432 | 67.0302 | 0.202721     | -0.260247    | 0.79467 | 0.999883 |
| gene2069 | gene2069 | SACOL2076 | gi 57650036 ref NC_002951.2 :2143706-2143844 | MVR | MR150 | OK     | 16790.5 | 19238   | 0.196319     | -0.257495    | 0.7968  | 0.999883 |
| gene207  | gene207  | SACOL0213 | gi 57650036 ref NC_002951.2 :251818-253030   | MVR | MR150 | OK     | 122.114 | 143.764 | 0.235473     | -0.276282    | 0.78233 | 0.999883 |
| gene2070 | gene2070 | SACOL2077 | gi 57650036 ref NC_002951.2 :2143971-2144181 | MVR | MR150 | OK     | 9.23386 | 0       | -1.79769e+30 | -1.79769e+30 | 0.04385 | 0.40838  |
| gene2071 | gene2071 | SACOL2078 | gi 57650036 ref NC_002951.2 :2144192-2144486 | MVR | MR150 | OK     | 4.61712 | 7.42357 | 0.68512      | -0.698807    | 0.48467 | 0.999883 |
| gene2072 | gene2072 | cls2      | gi 57650036 ref NC_002951.2 :2144651-2146136 | MVR | MR150 | OK     | 19.1551 | 21.335  | 0.15549      | -0.218479    | 0.82706 | 0.999883 |
| gene2073 | gene2073 | SACOL2080 | gi 57650036 ref NC_002951.2 :2146163-2146811 | MVR | MR150 | OK     | 20.9571 | 16.4009 | -0.353662    | 0.519721     | 0.60326 | 0.999883 |
| gene2074 | gene2074 | SACOL2081 | gi 57650036 ref NC_002951.2 :2146985-2147078 | MVR | MR150 | NOTEST | 0       | 0       | 0            | 0            | 1       | 1        |
| gene2075 | gene2075 | SACOL2082 | gi 57650036 ref NC_002951.2 :2147623-2148496 | MVR | MR150 | OK     | 227.048 | 208.177 | -0.125186    | 0.145536     | 0.88429 | 0.999883 |

|          |          |           |                                              |     |       |    |         |         |            |           |         |          |
|----------|----------|-----------|----------------------------------------------|-----|-------|----|---------|---------|------------|-----------|---------|----------|
| gene2076 | gene2076 | thiE      | gi 57650036 ref NC_002951.2 :2148581-2149223 | MVR | MR150 | OK | 2.23763 | 2.07792 | -0.106837  | 0.124336  | 0.90105 | 0.999883 |
| gene2077 | gene2077 | thiM      | gi 57650036 ref NC_002951.2 :2149224-2151512 | MVR | MR150 | OK | 2.67646 | 1.29313 | -1.04946   | 0.823484  | 0.41023 | 0.999883 |
| gene2078 | gene2078 | thiD2     | gi 57650036 ref NC_002951.2 :2149224-2151512 | MVR | MR150 | OK | 3.46787 | 1.69855 | -1.02974   | 0.96007   | 0.33702 | 0.999883 |
| gene2079 | gene2079 | SACOL2086 | gi 57650036 ref NC_002951.2 :2149224-2151512 | MVR | MR150 | OK | 1.00367 | 1.87452 | 0.901233   | -0.521045 | 0.60234 | 0.999883 |
| gene208  | gene208  | SACOL0214 | gi 57650036 ref NC_002951.2 :253141-254647   | MVR | MR150 | OK | 130.43  | 146.358 | 0.166222   | -0.18875  | 0.85029 | 0.999883 |
| gene2080 | gene2080 | SACOL2088 | gi 57650036 ref NC_002951.2 :2151897-2152593 | MVR | MR150 | OK | 20.4378 | 32.4076 | 0.665094   | -0.971189 | 0.33145 | 0.999883 |
| gene2081 | gene2081 | SACOL2089 | gi 57650036 ref NC_002951.2 :2152981-2153377 | MVR | MR150 | OK | 5.33004 | 2.32681 | -1.19579   | 1.26691   | 0.20519 | 0.877103 |
| gene2082 | gene2082 | ywpF      | gi 57650036 ref NC_002951.2 :2153570-2154011 | MVR | MR150 | OK | 41.7322 | 25.9819 | -0.683653  | 1.0028    | 0.31596 | 0.999465 |
| gene2083 | gene2083 | fabZ      | gi 57650036 ref NC_002951.2 :2154069-2154510 | MVR | MR150 | OK | 75.7065 | 86.8176 | 0.197571   | -0.284294 | 0.77619 | 0.999883 |
| gene2084 | gene2084 | murAA     | gi 57650036 ref NC_002951.2 :2154543-2155809 | MVR | MR150 | OK | 59.2128 | 63.0701 | 0.0910484  | -0.116387 | 0.90735 | 0.999883 |
| gene2085 | gene2085 | SACOL2093 | gi 57650036 ref NC_002951.2 :2155919-2156153 | MVR | MR150 | OK | 147.327 | 139.741 | -0.0762748 | 0.111963  | 0.91085 | 0.999883 |
| gene2086 | gene2086 | atpC      | gi 57650036 ref NC_002951.2 :2156714-2157119 | MVR | MR150 | OK | 389.945 | 369.814 | -0.0764712 | 0.096193  | 0.92337 | 0.999883 |
| gene2087 | gene2087 | atpD      | gi 57650036 ref NC_002951.2 :2157138-2158551 | MVR | MR150 | OK | 215.593 | 201.01  | -0.101043  | 0.11092   | 0.91168 | 0.999883 |
| gene2088 | gene2088 | atpG      | gi 57650036 ref NC_002951.2 :2158572-2159439 | MVR | MR150 | OK | 187.516 | 191.913 | 0.0334429  | -0.039528 | 0.96847 | 0.999883 |
| gene2089 | gene2089 | atpA      | gi 57650036 ref NC_002951.2 :2159469-2160978 | MVR | MR150 | OK | 202.585 | 216.343 | 0.0947928  | -0.103226 | 0.91778 | 0.999883 |
| gene209  | gene209  | SACOL0215 | gi 57650036 ref NC_002951.2 :254672-256244   | MVR | MR150 | OK | 302.89  | 317.264 | 0.0668914  | -0.070037 | 0.94417 | 0.999883 |
| gene2090 | gene2090 | atpH      | gi 57650036 ref NC_002951.2 :2160999-2162060 | MVR | MR150 | OK | 151.746 | 175.522 | 0.209993   | -0.189136 | 0.84999 | 0.999883 |
| gene2091 | gene2091 | atpF      | gi 57650036 ref NC_002951.2 :2160999-2162060 | MVR | MR150 | OK | 139.489 | 144.922 | 0.055118   | -0.045024 | 0.96409 | 0.999883 |
| gene2092 | gene2092 | atpE      | gi 57650036 ref NC_002951.2 :2162257-2162470 | MVR | MR150 | OK | 568.551 | 534.947 | -0.0878951 | 0.12601   | 0.89972 | 0.999883 |
| gene2093 | gene2093 | atpB      | gi 57650036 ref NC_002951.2 :2162512-2163241 | MVR | MR150 | OK | 232.709 | 226.314 | -0.0402039 | 0.047777  | 0.96189 | 0.999883 |
| gene2094 | gene2094 | SACOL2102 | gi 57650036 ref NC_002951.2 :2163261-2163615 | MVR | MR150 | OK | 175.327 | 195.762 | 0.159052   | -0.222189 | 0.82417 | 0.999883 |
| gene2095 | gene2095 | SACOL2103 | gi 57650036 ref NC_002951.2 :2163781-2164909 | MVR | MR150 | OK | 158.623 | 156.937 | -0.0154112 | 0.017905  | 0.98572 | 0.999883 |
| gene2096 | gene2096 | upp       | gi 57650036 ref NC_002951.2 :2164932-2165562 | MVR | MR150 | OK | 108.273 | 94.6895 | -0.193399  | 0.258272  | 0.7962  | 0.999883 |
| gene2097 | gene2097 | glyA      | gi 57650036 ref NC_002951.2 :2165589-2166828 | MVR | MR150 | OK | 172.567 | 167.446 | -0.0434616 | 0.049475  | 0.96054 | 0.999883 |
| gene2098 | gene2098 | SACOL2106 | gi 57650036 ref NC_002951.2 :2166854-2167379 | MVR | MR150 | OK | 97.3756 | 113.458 | 0.220523   | -0.302292 | 0.76243 | 0.999883 |
| gene2099 | gene2099 | SACOL2107 | gi 57650036 ref NC_002951.2 :2167485-2168957 | MVR | MR150 | OK | 27.427  | 33.9653 | 0.308465   | -0.27072  | 0.78661 | 0.999883 |
| gene21   | gene21   | yycG      | gi 57650036 ref NC_002951.2 :25665-28819     | MVR | MR150 | OK | 99.6093 | 114.382 | 0.19951    | -0.16852  | 0.86618 | 0.999883 |
| gene210  | gene210  | SACOL0216 | gi 57650036 ref NC_002951.2 :256690-257833   | MVR | MR150 | OK | 9.4817  | 9.41917 | -0.0095456 | 0.014038  | 0.9888  | 0.999883 |
| gene2100 | gene2100 | SACOL2108 | gi 57650036 ref NC_002951.2 :2167485-2168957 | MVR | MR150 | OK | 13.2141 | 12.3439 | -0.0982706 | 0.112223  | 0.91065 | 0.999883 |
| gene2101 | gene2101 | SACOL2109 | gi 57650036 ref NC_002951.2 :2169031-2170931 | MVR | MR150 | OK | 73.2574 | 76.4364 | 0.0612862  | -0.053637 | 0.95723 | 0.999883 |
| gene2102 | gene2102 | prfA      | gi 57650036 ref NC_002951.2 :2169031-2170931 | MVR | MR150 | OK | 51.7611 | 52.2101 | 0.0124624  | -0.010694 | 0.99147 | 0.999883 |
| gene2103 | gene2103 | tdk       | gi 57650036 ref NC_002951.2 :2170931-2171531 | MVR | MR150 | OK | 63.1114 | 62.754  | -0.0081918 | 0.011567  | 0.99077 | 0.999883 |
| gene2104 | gene2104 | rpmE2     | gi 57650036 ref NC_002951.2 :2171877-2172132 | MVR | MR150 | OK | 659.538 | 700.567 | 0.0870684  | -0.115684 | 0.9079  | 0.999883 |



|          |          |           |                                              |     |       |        |         |         |            |           |         |          |
|----------|----------|-----------|----------------------------------------------|-----|-------|--------|---------|---------|------------|-----------|---------|----------|
| gene2105 | gene2105 | rho       | gi 57650036 ref NC_002951.2 :2172249-2173566 | MVR | MR150 | OK     | 139.441 | 132.586 | -0.0727288 | 0.084137  | 0.93295 | 0.999883 |
| gene2106 | gene2106 | SACOL2114 | gi 57650036 ref NC_002951.2 :2173812-2175240 | MVR | MR150 | OK     | 41.3865 | 42.0309 | 0.022287   | -0.029233 | 0.97668 | 0.999883 |
| gene2107 | gene2107 | SACOL2115 | gi 57650036 ref NC_002951.2 :2175477-2175813 | MVR | MR150 | OK     | 839.249 | 1077.9  | 0.361056   | -0.426681 | 0.66961 | 0.999883 |
| gene2108 | gene2108 | murAB     | gi 57650036 ref NC_002951.2 :2175901-2177161 | MVR | MR150 | OK     | 77.2812 | 82.7874 | 0.0992943  | -0.123045 | 0.90207 | 0.999883 |
| gene2109 | gene2109 | fbaA      | gi 57650036 ref NC_002951.2 :2177626-2178487 | MVR | MR150 | OK     | 213.607 | 194.581 | -0.134588  | 0.157928  | 0.87451 | 0.999883 |
| gene211  | gene211  | SACOL0217 | gi 57650036 ref NC_002951.2 :258146-259622   | MVR | MR150 | OK     | 12.2857 | 14.4036 | 0.229449   | -0.332075 | 0.73983 | 0.999883 |
| gene2110 | gene2110 | SACOL2118 | gi 57650036 ref NC_002951.2 :2178704-2179226 | MVR | MR150 | OK     | 22.9217 | 33.7359 | 0.557568   | -0.818076 | 0.41331 | 0.999883 |
| gene2111 | gene2111 | pyrG      | gi 57650036 ref NC_002951.2 :2179334-2180945 | MVR | MR150 | OK     | 38.6259 | 40.706  | 0.075674   | -0.09834  | 0.92166 | 0.999883 |
| gene2112 | gene2112 | rpoE      | gi 57650036 ref NC_002951.2 :2181280-2181811 | MVR | MR150 | OK     | 130.866 | 106.321 | -0.299663  | 0.405095  | 0.68541 | 0.999883 |
| gene2113 | gene2113 | SACOL2121 | gi 57650036 ref NC_002951.2 :2181922-2182783 | MVR | MR150 | OK     | 30.4759 | 33.3567 | 0.130307   | -0.186394 | 0.85214 | 0.999883 |
| gene2114 | gene2114 | SACOL2122 | gi 57650036 ref NC_002951.2 :2183206-2184010 | MVR | MR150 | OK     | 16.9364 | 21.0397 | 0.312988   | -0.458957 | 0.64627 | 0.999883 |
| gene2115 | gene2115 | SACOL2123 | gi 57650036 ref NC_002951.2 :2184139-2184811 | MVR | MR150 | OK     | 38.3658 | 47.0272 | 0.293672   | -0.421297 | 0.67354 | 0.999883 |
| gene2116 | gene2116 | SACOL2124 | gi 57650036 ref NC_002951.2 :2185209-2187587 | MVR | MR150 | OK     | 41.1786 | 48.0699 | 0.223241   | -0.217673 | 0.82768 | 0.999883 |
| gene2117 | gene2117 | SACOL2125 | gi 57650036 ref NC_002951.2 :2185209-2187587 | MVR | MR150 | OK     | 30.9753 | 28.9188 | -0.0991097 | 0.078802  | 0.93719 | 0.999883 |
| gene2118 | gene2118 | luxS      | gi 57650036 ref NC_002951.2 :2187897-2188368 | MVR | MR150 | OK     | 111.293 | 88.5729 | -0.32942   | 0.462805  | 0.6435  | 0.999883 |
| gene2119 | gene2119 | SACOL2127 | gi 57650036 ref NC_002951.2 :2188519-2188870 | MVR | MR150 | OK     | 277.636 | 283.623 | 0.0307816  | -0.041296 | 0.96706 | 0.999883 |
| gene212  | gene212  | SACOL0218 | gi 57650036 ref NC_002951.2 :259819-260176   | MVR | MR150 | OK     | 3.75796 | 6.69732 | 0.833635   | -0.913484 | 0.36099 | 0.999883 |
| gene2120 | gene2120 | pdp       | gi 57650036 ref NC_002951.2 :2188883-2190185 | MVR | MR150 | OK     | 102.157 | 110.347 | 0.111266   | -0.132617 | 0.8945  | 0.999883 |
| gene2121 | gene2121 | deoC2     | gi 57650036 ref NC_002951.2 :2190463-2191126 | MVR | MR150 | OK     | 68.8484 | 74.7211 | 0.118093   | -0.162205 | 0.87114 | 0.999883 |
| gene2122 | gene2122 | deoD      | gi 57650036 ref NC_002951.2 :2191440-2192151 | MVR | MR150 | OK     | 107.927 | 124.33  | 0.204117   | -0.264002 | 0.79178 | 0.999883 |
| gene2123 | gene2123 | SACOL2131 | gi 57650036 ref NC_002951.2 :2192271-2192715 | MVR | MR150 | OK     | 1579.41 | 2855.22 | 0.854218   | -0.890471 | 0.37321 | 0.999883 |
| gene2124 | gene2124 | SACOL2132 | gi 57650036 ref NC_002951.2 :2192914-2193328 | MVR | MR150 | OK     | 4.85919 | 5.69732 | 0.229568   | -0.274964 | 0.78334 | 0.999883 |
| gene2125 | gene2125 | SACOL2133 | gi 57650036 ref NC_002951.2 :2193785-2195159 | MVR | MR150 | OK     | 31.1748 | 36.2666 | 0.218261   | -0.293908 | 0.76883 | 0.999883 |
| gene2126 | gene2126 | SACOL2134 | gi 57650036 ref NC_002951.2 :2195830-2196061 | MVR | MR150 | OK     | 23.6471 | 23.316  | -0.0203428 | 0.024686  | 0.98031 | 0.999883 |
| gene2127 | gene2127 | manA1     | gi 57650036 ref NC_002951.2 :2196091-2197030 | MVR | MR150 | OK     | 34.1042 | 45.9999 | 0.431679   | -0.599521 | 0.54883 | 0.999883 |
| gene2128 | gene2128 | SACOL2136 | gi 57650036 ref NC_002951.2 :2197464-2198130 | MVR | MR150 | OK     | 15.7397 | 10.1834 | -0.62818   | 0.914935  | 0.36023 | 0.999883 |
| gene2129 | gene2129 | czrA      | gi 57650036 ref NC_002951.2 :2198281-2198602 | MVR | MR150 | OK     | 42.1089 | 62.7582 | 0.575678   | -0.838655 | 0.40166 | 0.999883 |
| gene213  | gene213  | SACOL0219 | gi 57650036 ref NC_002951.2 :260332-260506   | MVR | MR150 | NOTEST | 0       | 0       | 0          | 0         | 1       | 1        |
| gene2130 | gene2130 | SACOL2138 | gi 57650036 ref NC_002951.2 :2198603-2199584 | MVR | MR150 | OK     | 32.4445 | 40.5863 | 0.323019   | -0.450167 | 0.65259 | 0.999883 |
| gene2131 | gene2131 | SACOL2139 | gi 57650036 ref NC_002951.2 :2199793-2200941 | MVR | MR150 | NOTEST | 0       | 0       | 0          | 0         | 1       | 1        |
| gene2132 | gene2132 | SACOL2140 | gi 57650036 ref NC_002951.2 :2199793-2200941 | MVR | MR150 | OK     | 159.54  | 133.872 | -0.253059  | 0.293476  | 0.76916 | 0.999883 |
| gene2133 | gene2133 | SACOL2141 | gi 57650036 ref NC_002951.2 :2201903-2202107 | MVR | MR150 | OK     | 6.21505 | 4.59906 | -0.434425  | 0.271934  | 0.78567 | 0.999883 |
| gene2134 | gene2134 | SACOL2142 | gi 57650036 ref NC_002951.2 :2202165-2203302 | MVR | MR150 | OK     | 11.914  | 13.8923 | 0.221632   | -0.324671 | 0.74543 | 0.999883 |

|          |          |             |                                              |     |       |        |         |         |             |           |         |          |
|----------|----------|-------------|----------------------------------------------|-----|-------|--------|---------|---------|-------------|-----------|---------|----------|
| gene2135 | gene2135 | SACOL2143   | gi 57650036 ref NC_002951.2 :2204387-2205257 | MVR | MR150 | OK     | 39.4652 | 43.4214 | 0.137826    | -0.19262  | 0.84726 | 0.999883 |
| gene2136 | gene2136 | SACOL2144   | gi 57650036 ref NC_002951.2 :2205312-2206095 | MVR | MR150 | OK     | 7.11261 | 6.04016 | -0.235793   | 0.335769  | 0.73705 | 0.999883 |
| gene2137 | gene2137 | glmS        | gi 57650036 ref NC_002951.2 :2206326-2208132 | MVR | MR150 | OK     | 30.3164 | 37.2906 | 0.298715    | -0.38941  | 0.69697 | 0.999883 |
| gene2138 | gene2138 | SACOL2146   | gi 57650036 ref NC_002951.2 :2208812-2210351 | MVR | MR150 | OK     | 4.09182 | 2.40207 | -0.768462   | 1.09903   | 0.27176 | 0.956024 |
| gene2139 | gene2139 | SACOL2147   | gi 57650036 ref NC_002951.2 :2210385-2212518 | MVR | MR150 | OK     | 4.62651 | 2.69422 | -0.780059   | 1.14016   | 0.25422 | 0.932194 |
| gene214  | gene214  | SACOL0220   | gi 57650036 ref NC_002951.2 :260531-261677   | MVR | MR150 | OK     | 61.5257 | 72.0387 | 0.227582    | -0.292007 | 0.77028 | 0.999883 |
| gene2140 | gene2140 | SACOL2148   | gi 57650036 ref NC_002951.2 :2212529-2214070 | MVR | MR150 | OK     | 10.4443 | 7.14632 | -0.547442   | 0.39024   | 0.69636 | 0.999883 |
| gene2141 | gene2141 | mtlD        | gi 57650036 ref NC_002951.2 :2212529-2214070 | MVR | MR150 | OK     | 8.54356 | 5.74065 | -0.573624   | 0.735931  | 0.46177 | 0.999883 |
| gene2142 | gene2142 | fmtB        | gi 57650036 ref NC_002951.2 :2214388-2221825 | MVR | MR150 | OK     | 2.4735  | 1.92633 | -0.360701   | 0.523393  | 0.6007  | 0.999883 |
| gene2143 | gene2143 | glmM        | gi 57650036 ref NC_002951.2 :2222101-2223457 | MVR | MR150 | OK     | 97.9045 | 90.4881 | -0.113648   | 0.136629  | 0.89132 | 0.999883 |
| gene2144 | gene2144 | SACOL2152   | gi 57650036 ref NC_002951.2 :2223483-2224416 | MVR | MR150 | OK     | 36.5371 | 35.0955 | -0.0580763  | 0.081594  | 0.93497 | 0.999883 |
| gene2145 | gene2145 | SACOL2153   | gi 57650036 ref NC_002951.2 :2224417-2225227 | MVR | MR150 | OK     | 74.0369 | 75.0486 | 0.0195817   | -0.026013 | 0.97925 | 0.999883 |
| gene2146 | gene2146 | rocF        | gi 57650036 ref NC_002951.2 :2225415-2226324 | MVR | MR150 | OK     | 239.278 | 247.069 | 0.0462248   | -0.052785 | 0.9579  | 0.999883 |
| gene2147 | gene2147 | SACOL2155   | gi 57650036 ref NC_002951.2 :2226549-2227752 | MVR | MR150 | OK     | 1.01552 | 0.76344 | -0.411633   | 0.471948  | 0.63696 | 0.999883 |
| gene2149 | gene2149 | SACOL_tRNA- | gi 57650036 ref NC_002951.2 :2228058-2228133 | MVR | MR150 | NOTEST | 0       | 0       | 0           | 0         | 1       | 1        |
| gene215  | gene215  | ldh1        | gi 57650036 ref NC_002951.2 :262249-263203   | MVR | MR150 | OK     | 16.9822 | 6.90495 | -1.29832    | 1.89336   | 0.05831 | 0.483937 |
| gene2150 | gene2150 | SACOL_tRNA- | gi 57650036 ref NC_002951.2 :2228142-2228226 | MVR | MR150 | NOTEST | 0       | 0       | 0           | 0         | 1       | 1        |
| gene2151 | gene2151 | SACOL_tRNA- | gi 57650036 ref NC_002951.2 :2228255-2228331 | MVR | MR150 | OK     | 0       | #####   | 1.79769e+30 | 1.79769e+ | 0.10824 | 0.653986 |
| gene2152 | gene2152 | SACOL_tRNA- | gi 57650036 ref NC_002951.2 :2228338-2228410 | MVR | MR150 | NOTEST | 0       | 0       | 0           | 0         | 1       | 1        |
| gene2153 | gene2153 | SACOL_tRNA- | gi 57650036 ref NC_002951.2 :2228411-2228486 | MVR | MR150 | NOTEST | 0       | 0       | 0           | 0         | 1       | 1        |
| gene2154 | gene2154 | rrfF        | gi 57650036 ref NC_002951.2 :2228496-2228611 | MVR | MR150 | OK     | 863085  | 485395  | -0.830344   | 0.923812  | 0.35558 | 0.999883 |
| gene2155 | gene2155 | rrlF        | gi 57650036 ref NC_002951.2 :2228683-2231606 | MVR | MR150 | HIDATA | 0       | 51023.7 | 0           | 0         | 1       | 1        |
| gene2156 | gene2156 | rrsF        | gi 57650036 ref NC_002951.2 :2232152-2233707 | MVR | MR150 | OK     | 10681   | 15148.8 | 0.504166    | -0.719857 | 0.47161 | 0.999883 |
| gene2157 | gene2157 | SACOL2156   | gi 57650036 ref NC_002951.2 :2234162-2235227 | MVR | MR150 | OK     | 240.941 | 300.786 | 0.320059    | -0.354292 | 0.72312 | 0.999883 |
| gene2158 | gene2158 | SACOL2157   | gi 57650036 ref NC_002951.2 :2235374-2236817 | MVR | MR150 | OK     | 26.292  | 25.8754 | -0.0230464  | 0.031684  | 0.97472 | 0.999883 |
| gene2159 | gene2159 | SACOL2158   | gi 57650036 ref NC_002951.2 :2237138-2237612 | MVR | MR150 | OK     | 106.253 | 116.626 | 0.134384    | -0.186494 | 0.85206 | 0.999883 |
| gene216  | gene216  | SACOL0223   | gi 57650036 ref NC_002951.2 :263370-263496   | MVR | MR150 | NOTEST | 0       | 0       | 0           | 0         | 1       | 1        |
| gene2160 | gene2160 | SACOL2159   | gi 57650036 ref NC_002951.2 :2237710-2239054 | MVR | MR150 | OK     | 29.9209 | 25.5702 | -0.226692   | 0.312427  | 0.75472 | 0.999883 |
| gene2161 | gene2161 | SACOL2160   | gi 57650036 ref NC_002951.2 :2239230-2239914 | MVR | MR150 | OK     | 138.914 | 154.982 | 0.157909    | -0.200147 | 0.84137 | 0.999883 |
| gene2162 | gene2162 | SACOL2161   | gi 57650036 ref NC_002951.2 :2239932-2241120 | MVR | MR150 | OK     | 126.913 | 147.565 | 0.217514    | -0.254974 | 0.79874 | 0.999883 |
| gene2163 | gene2163 | SACOL2162   | gi 57650036 ref NC_002951.2 :2241163-2241679 | MVR | MR150 | OK     | 124.14  | 144.761 | 0.221708    | -0.297231 | 0.76629 | 0.999883 |
| gene2164 | gene2164 | SACOL2163   | gi 57650036 ref NC_002951.2 :2241856-2242117 | MVR | MR150 | OK     | 1523.48 | 2716.48 | 0.834366    | -0.971361 | 0.33137 | 0.999883 |
| gene2165 | gene2165 | SACOL2164   | gi 57650036 ref NC_002951.2 :2242248-2243619 | MVR | MR150 | OK     | 70.263  | 74.4193 | 0.0829107   | -0.102747 | 0.91816 | 0.999883 |

|          |          |           |                                              |     |       |        |         |         |             |             |         |          |
|----------|----------|-----------|----------------------------------------------|-----|-------|--------|---------|---------|-------------|-------------|---------|----------|
| gene2166 | gene2166 | SACOL2165 | gi 57650036 ref NC_002951.2 :2243854-2245851 | MVR | MR150 | OK     | 6.43639 | 8.96072 | 0.477362    | -0.511924   | 0.6087  | 0.999883 |
| gene2167 | gene2167 | SACOL2166 | gi 57650036 ref NC_002951.2 :2243854-2245851 | MVR | MR150 | OK     | 6.80321 | 4.96951 | -0.453113   | 0.441492    | 0.65886 | 0.999883 |
| gene2168 | gene2168 | SACOL2167 | gi 57650036 ref NC_002951.2 :2245862-2246846 | MVR | MR150 | OK     | 28.2384 | 25.3915 | -0.153315   | 0.219362    | 0.82637 | 0.999883 |
| gene2169 | gene2169 | SACOL2168 | gi 57650036 ref NC_002951.2 :2247237-2248308 | MVR | MR150 | OK     | 5.24728 | 3.69218 | -0.507097   | 0.721804    | 0.47042 | 0.999883 |
| gene217  | gene217  | SACOL0224 | gi 57650036 ref NC_002951.2 :263522-265052   | MVR | MR150 | OK     | 2.73175 | 1.3819  | -0.983171   | 1.34272     | 0.17936 | 0.824159 |
| gene2170 | gene2170 | SACOL2169 | gi 57650036 ref NC_002951.2 :2248314-2251252 | MVR | MR150 | OK     | 4.30844 | 4.71888 | 0.131277    | -0.159594   | 0.8732  | 0.999883 |
| gene2171 | gene2171 | SACOL2170 | gi 57650036 ref NC_002951.2 :2248314-2251252 | MVR | MR150 | OK     | 4.40122 | 2.00291 | -1.1358     | 0.876647    | 0.38068 | 0.999883 |
| gene2172 | gene2172 | SACOL2171 | gi 57650036 ref NC_002951.2 :2251353-2253330 | MVR | MR150 | OK     | 13.5463 | 15.6016 | 0.203794    | -0.286405   | 0.77457 | 0.999883 |
| gene2173 | gene2173 | SACOL2172 | gi 57650036 ref NC_002951.2 :2253785-2255410 | MVR | MR150 | NOTEST | 0.54271 | 0.32245 | -0.7511     | 0.780063    | 0.43535 | 1        |
| gene2174 | gene2174 | SACOL2173 | gi 57650036 ref NC_002951.2 :2255445-2255955 | MVR | MR150 | OK     | 613.801 | 508.79  | -0.270702   | 0.309675    | 0.75681 | 0.999883 |
| gene2175 | gene2175 | SACOL2174 | gi 57650036 ref NC_002951.2 :2256017-2256257 | MVR | MR150 | OK     | 111.485 | 159.965 | 0.520903    | -0.762523   | 0.44575 | 0.999883 |
| gene2176 | gene2176 | SACOL2175 | gi 57650036 ref NC_002951.2 :2256269-2256818 | MVR | MR150 | OK     | 99.038  | 95.149  | -0.0577948  | 0.079296    | 0.9368  | 0.999883 |
| gene2177 | gene2177 | opuD2     | gi 57650036 ref NC_002951.2 :2256980-2258543 | MVR | MR150 | OK     | 26.0328 | 17.867  | -0.543037   | 0.7532      | 0.45133 | 0.999883 |
| gene2178 | gene2178 | SACOL2177 | gi 57650036 ref NC_002951.2 :2258849-2259851 | MVR | MR150 | OK     | 20.8957 | 22.5306 | 0.108681    | -0.157176   | 0.87511 | 0.999883 |
| gene2179 | gene2179 | SACOL2178 | gi 57650036 ref NC_002951.2 :2260084-2261086 | MVR | MR150 | OK     | 188.888 | 215.568 | 0.190614    | -0.219101   | 0.82657 | 0.999883 |
| gene218  | gene218  | SACOL0225 | gi 57650036 ref NC_002951.2 :265413-266349   | MVR | MR150 | OK     | 10.6768 | 10.6106 | -0.0089736  | 0.013186    | 0.98948 | 0.999883 |
| gene2180 | gene2180 | SACOL2179 | gi 57650036 ref NC_002951.2 :2261368-2262238 | MVR | MR150 | OK     | 54.3099 | 64.218  | 0.241762    | -0.325733   | 0.74463 | 0.999883 |
| gene2181 | gene2181 | lacG      | gi 57650036 ref NC_002951.2 :2262503-2263916 | MVR | MR150 | OK     | 3.8367  | 3.66161 | -0.0673864  | 0.097163    | 0.9226  | 0.999883 |
| gene2182 | gene2182 | lacE      | gi 57650036 ref NC_002951.2 :2263933-2265963 | MVR | MR150 | OK     | 1.95611 | 1.31083 | -0.577505   | 0.771524    | 0.4404  | 0.999883 |
| gene2183 | gene2183 | lacF      | gi 57650036 ref NC_002951.2 :2263933-2265963 | MVR | MR150 | OK     | 0       | 1.2884  | 1.79769e+30 | 1.79769e+30 | 0.24727 | 0.921931 |
| gene2184 | gene2184 | lacD      | gi 57650036 ref NC_002951.2 :2265984-2266965 | MVR | MR150 | OK     | 2.00847 | 1.17641 | -0.771699   | 0.938725    | 0.34787 | 0.999883 |
| gene2185 | gene2185 | lacC      | gi 57650036 ref NC_002951.2 :2266968-2267901 | MVR | MR150 | OK     | 2.30934 | 0.83561 | -1.46659    | 1.697       | 0.0897  | 0.601607 |
| gene2186 | gene2186 | lacB      | gi 57650036 ref NC_002951.2 :2267913-2268429 | MVR | MR150 | OK     | 1.39932 | 0.48415 | -1.5312     | 1.10469     | 0.26929 | 0.952424 |
| gene2187 | gene2187 | SACOL2186 | gi 57650036 ref NC_002951.2 :2268444-2268873 | MVR | MR150 | OK     | 1.97797 | 0.66642 | -1.56952    | 1.13233     | 0.2575  | 0.935956 |
| gene2188 | gene2188 | SACOL2187 | gi 57650036 ref NC_002951.2 :2268887-2269004 | MVR | MR150 | NOTEST | 0       | 0       | 0           | 0           | 1       | 1        |
| gene2189 | gene2189 | lacR      | gi 57650036 ref NC_002951.2 :2269240-2269996 | MVR | MR150 | OK     | 15.4963 | 16.5216 | 0.0924263   | -0.135904   | 0.8919  | 0.999883 |
| gene219  | gene219  | SACOL0228 | gi 57650036 ref NC_002951.2 :266687-269236   | MVR | MR150 | OK     | 1.90491 | 0.32298 | -2.5602     | 2.8262      | 0.00471 | 0.101483 |
| gene2190 | gene2190 | SACOL2189 | gi 57650036 ref NC_002951.2 :2270246-2270978 | MVR | MR150 | OK     | 19.2204 | 21.2952 | 0.147888    | -0.217163   | 0.82808 | 0.999883 |
| gene2191 | gene2191 | SACOL2190 | gi 57650036 ref NC_002951.2 :2271268-2271877 | MVR | MR150 | NOTEST | 0.91092 | 0.74847 | -0.283382   | 0.24919     | 0.80321 | 1        |
| gene2192 | gene2192 | SACOL2191 | gi 57650036 ref NC_002951.2 :2272138-2272264 | MVR | MR150 | NOTEST | 0       | 0       | 0           | 0           | 1       | 1        |
| gene2193 | gene2193 | SACOL2192 | gi 57650036 ref NC_002951.2 :2272483-2273332 | MVR | MR150 | OK     | 77.5584 | 80.9221 | 0.0612497   | -0.080373   | 0.93594 | 0.999883 |
| gene2194 | gene2194 | SACOL2193 | gi 57650036 ref NC_002951.2 :2273401-2273818 | MVR | MR150 | OK     | 5.08722 | 3.51272 | -0.534287   | 0.612575    | 0.54016 | 0.999883 |
| gene2195 | gene2195 | hysA      | gi 57650036 ref NC_002951.2 :2274225-2276649 | MVR | MR150 | OK     | 1.43569 | 0.551   | -1.38162    | 1.80969     | 0.07034 | 0.522414 |

|          |          |           |                                              |     |       |        |         |         |                        |           |         |          |
|----------|----------|-----------|----------------------------------------------|-----|-------|--------|---------|---------|------------------------|-----------|---------|----------|
| gene2196 | gene2196 | SACOL2195 | gi 57650036 ref NC_002951.2 :2276708-2277563 | MVR | MR150 | OK     | 16.7728 | 21.9739 | 0.389665               | -0.569989 | 0.56869 | 0.999883 |
| gene2197 | gene2197 | SACOL2196 | gi 57650036 ref NC_002951.2 :2277773-2278589 | MVR | MR150 | OK     | 11.7535 | 10.9364 | -0.103954              | 0.152442  | 0.87884 | 0.999883 |
| gene2198 | gene2198 | SACOL2197 | gi 57650036 ref NC_002951.2 :2278882-2279308 | MVR | MR150 | OK     | 10.6033 | 8.77649 | -0.272804              | 0.365617  | 0.71465 | 0.999883 |
| gene2199 | gene2199 | budA1     | gi 57650036 ref NC_002951.2 :2279671-2280376 | MVR | MR150 | OK     | 2.43098 | 1.81889 | -0.418486              | 0.498064  | 0.61844 | 0.999883 |
| gene22   | gene22   | yych      | gi 57650036 ref NC_002951.2 :25665-28819     | MVR | MR150 | OK     | 98.0174 | 100.663 | 0.0384191              | -0.026094 | 0.97918 | 0.999883 |
| gene220  | gene220  | SACOL0229 | gi 57650036 ref NC_002951.2 :266687-269236   | MVR | MR150 | NOTEST | 0.95453 | 0.57043 | -0.742735              | 0.283112  | 0.77709 | 1        |
| gene2200 | gene2200 | budB      | gi 57650036 ref NC_002951.2 :2280412-2282077 | MVR | MR150 | OK     | 3.89645 | 3.34557 | -0.219908              | 0.319533  | 0.74932 | 0.999883 |
| gene2201 | gene2201 | SACOL2200 | gi 57650036 ref NC_002951.2 :2282356-2282452 | MVR | MR150 | NOTEST | 0       | 0       | 0                      | 0         | 1       | 1        |
| gene2202 | gene2202 | SACOL2201 | gi 57650036 ref NC_002951.2 :2283266-2283866 | MVR | MR150 | OK     | 7.77234 | 16.4538 | 1.082                  | -1.54545  | 0.12224 | 0.695472 |
| gene2203 | gene2203 | SACOL2202 | gi 57650036 ref NC_002951.2 :2283898-2284672 | MVR | MR150 | OK     | 6.6974  | 9.33557 | 0.479136               | -0.689177 | 0.49071 | 0.999883 |
| gene2204 | gene2204 | SACOL2203 | gi 57650036 ref NC_002951.2 :2284800-2285937 | MVR | MR150 | OK     | 12.4264 | 12.7482 | 0.0368891              | -0.054081 | 0.95687 | 0.999883 |
| gene2205 | gene2205 | SACOL2204 | gi 57650036 ref NC_002951.2 :2285937-2286729 | MVR | MR150 | OK     | 16.4705 | 15.5175 | -0.0859856             | 0.126437  | 0.89939 | 0.999883 |
| gene2206 | gene2206 | SACOL2205 | gi 57650036 ref NC_002951.2 :2286768-2288129 | MVR | MR150 | OK     | 2.57187 | 1.58299 | -0.700169              | 0.94837   | 0.34294 | 0.999883 |
| gene2207 | gene2207 | rpsI      | gi 57650036 ref NC_002951.2 :2288673-2289072 | MVR | MR150 | OK     | 651.818 | 726.849 | 0.157186               | -0.184809 | 0.85338 | 0.999883 |
| gene2208 | gene2208 | rplM      | gi 57650036 ref NC_002951.2 :2289085-2289523 | MVR | MR150 | OK     | 178.136 | 225.198 | 0.338213               | -0.448417 | 0.65385 | 0.999883 |
| gene2209 | gene2209 | truA      | gi 57650036 ref NC_002951.2 :2289762-2290566 | MVR | MR150 | OK     | 18.6502 | 19.2653 | 0.0468125              | -0.068679 | 0.94525 | 0.999883 |
| gene221  | gene221  | SACOL0230 | gi 57650036 ref NC_002951.2 :269258-269537   | MVR | MR150 | OK     | 4.52567 | 1.69174 | -1.41962               | 1.01027   | 0.31237 | 0.994118 |
| gene2210 | gene2210 | SACOL2209 | gi 57650036 ref NC_002951.2 :2290570-2293033 | MVR | MR150 | OK     | 24.6722 | 24.7194 | 0.00275771             | -0.002044 | 0.99837 | 0.999883 |
| gene2211 | gene2211 | cbiO      | gi 57650036 ref NC_002951.2 :2290570-2293033 | MVR | MR150 | OK     | 20.7456 | 28.0289 | 0.434106               | -0.332933 | 0.73919 | 0.999883 |
| gene2212 | gene2212 | cbiO      | gi 57650036 ref NC_002951.2 :2290570-2293033 | MVR | MR150 | OK     | 24.2466 | 29.8688 | 0.300861               | -0.234089 | 0.81492 | 0.999883 |
| gene2213 | gene2213 | rplQ      | gi 57650036 ref NC_002951.2 :2293570-2293939 | MVR | MR150 | OK     | 159.832 | 159.892 | 0.00053984             | -0.000759 | 0.9994  | 0.999883 |
| gene2214 | gene2214 | rpoA      | gi 57650036 ref NC_002951.2 :2293955-2294900 | MVR | MR150 | OK     | 214.035 | 196.701 | -0.121842              | 0.140937  | 0.88792 | 0.999883 |
| gene2215 | gene2215 | rpsK      | gi 57650036 ref NC_002951.2 :2294974-2295364 | MVR | MR150 | OK     | 196.129 | 218.972 | 0.158942               | -0.214999 | 0.82977 | 0.999883 |
| gene2216 | gene2216 | rpsM      | gi 57650036 ref NC_002951.2 :2295387-2295753 | MVR | MR150 | OK     | 141.015 | 142.617 | 0.0162921              | -0.023166 | 0.98152 | 0.999883 |
| gene2217 | gene2217 | rpmJ      | gi 57650036 ref NC_002951.2 :2295775-2295889 | MVR | MR150 | OK     | 804.75  | 2081.26 | 1.37085                | -1.18378  | 0.2365  | 0.90647  |
| gene2218 | gene2218 | infA      | gi 57650036 ref NC_002951.2 :2295920-2296139 | MVR | MR150 | OK     | 176.863 | 237.941 | 0.427972               | -0.627794 | 0.53014 | 0.999883 |
| gene2219 | gene2219 | adk       | gi 57650036 ref NC_002951.2 :2296331-2296979 | MVR | MR150 | OK     | 182.547 | 175.968 | -0.0529561             | 0.066182  | 0.94723 | 0.999883 |
| gene222  | gene222  | SACOL0231 | gi 57650036 ref NC_002951.2 :269601-269736   | MVR | MR150 | OK     | 25.1679 | 0       | -1.79769e+3(-1.79769e+ | 0.22252   | 0.89416 |          |
| gene2220 | gene2220 | secY      | gi 57650036 ref NC_002951.2 :2296995-2298728 | MVR | MR150 | OK     | 285.524 | 282.762 | -0.0140251             | 0.012878  | 0.98973 | 0.999883 |
| gene2221 | gene2221 | rplO      | gi 57650036 ref NC_002951.2 :2296995-2298728 | MVR | MR150 | OK     | 390.838 | 352.974 | -0.14701               | 0.072153  | 0.94248 | 0.999883 |
| gene2222 | gene2222 | rpmD      | gi 57650036 ref NC_002951.2 :2298744-2298924 | MVR | MR150 | OK     | 474.577 | 739.213 | 0.639348               | -0.936161 | 0.34919 | 0.999883 |
| gene2223 | gene2223 | rpsE      | gi 57650036 ref NC_002951.2 :2298940-2299441 | MVR | MR150 | OK     | 197.557 | 193.115 | -0.0328119             | 0.042557  | 0.96606 | 0.999883 |
| gene2224 | gene2224 | rplR      | gi 57650036 ref NC_002951.2 :2299461-2299821 | MVR | MR150 | OK     | 373.733 | 336.563 | -0.151131              | 0.196933  | 0.84388 | 0.999883 |

|          |          |           |                                              |     |       |        |         |         |            |           |         |          |
|----------|----------|-----------|----------------------------------------------|-----|-------|--------|---------|---------|------------|-----------|---------|----------|
| gene2225 | gene2225 | rplF      | gi 57650036 ref NC_002951.2 :2299851-2300388 | MVR | MR150 | OK     | 265.519 | 310.574 | 0.226118   | -0.276521 | 0.78215 | 0.999883 |
| gene2226 | gene2226 | rpsH      | gi 57650036 ref NC_002951.2 :2300412-2300811 | MVR | MR150 | OK     | 165.905 | 236.169 | 0.509455   | -0.688924 | 0.49087 | 0.999883 |
| gene2227 | gene2227 | rpsN      | gi 57650036 ref NC_002951.2 :2300842-2301028 | MVR | MR150 | OK     | 71.2806 | 76.7981 | 0.107561   | -0.137304 | 0.89079 | 0.999883 |
| gene2228 | gene2228 | rplE      | gi 57650036 ref NC_002951.2 :2301050-2301590 | MVR | MR150 | OK     | 187.049 | 217.378 | 0.216787   | -0.276172 | 0.78242 | 0.999883 |
| gene2229 | gene2229 | rplX      | gi 57650036 ref NC_002951.2 :2301616-2301934 | MVR | MR150 | OK     | 184.742 | 233.036 | 0.335039   | -0.47296  | 0.63624 | 0.999883 |
| gene223  | gene223  | SACOL0232 | gi 57650036 ref NC_002951.2 :269763-271023   | MVR | MR150 | OK     | 1.91933 | 1.58929 | -0.272222  | 0.358398  | 0.72005 | 0.999883 |
| gene2230 | gene2230 | rplN      | gi 57650036 ref NC_002951.2 :2301969-2302338 | MVR | MR150 | OK     | 207.549 | 243.857 | 0.232587   | -0.315692 | 0.75224 | 0.999883 |
| gene2231 | gene2231 | rpsQ      | gi 57650036 ref NC_002951.2 :2302369-2302633 | MVR | MR150 | OK     | 252.31  | 275.992 | 0.129425   | -0.185962 | 0.85248 | 0.999883 |
| gene2232 | gene2232 | rpmC      | gi 57650036 ref NC_002951.2 :2302656-2303290 | MVR | MR150 | OK     | 238.234 | 221.051 | -0.108     | 0.040057  | 0.96805 | 0.999883 |
| gene2233 | gene2233 | rplP      | gi 57650036 ref NC_002951.2 :2302656-2303290 | MVR | MR150 | OK     | 365.001 | 344.323 | -0.0841367 | 0.098946  | 0.92118 | 0.999883 |
| gene2234 | gene2234 | rpsC      | gi 57650036 ref NC_002951.2 :2303292-2303946 | MVR | MR150 | OK     | 265.517 | 292.666 | 0.140451   | -0.166173 | 0.86802 | 0.999883 |
| gene2235 | gene2235 | rplV      | gi 57650036 ref NC_002951.2 :2303969-2304323 | MVR | MR150 | OK     | 158.731 | 210.371 | 0.406356   | -0.567712 | 0.57023 | 0.999883 |
| gene2236 | gene2236 | rpsS      | gi 57650036 ref NC_002951.2 :2304351-2304630 | MVR | MR150 | OK     | 216.478 | 250.378 | 0.20989    | -0.301022 | 0.7634  | 0.999883 |
| gene2237 | gene2237 | rplB      | gi 57650036 ref NC_002951.2 :2304696-2305530 | MVR | MR150 | OK     | 271.177 | 322.165 | 0.248564   | -0.281432 | 0.77838 | 0.999883 |
| gene2238 | gene2238 | rplW      | gi 57650036 ref NC_002951.2 :2305562-2306461 | MVR | MR150 | OK     | 112.541 | 168.729 | 0.584249   | -0.223068 | 0.82348 | 0.999883 |
| gene2239 | gene2239 | rplD      | gi 57650036 ref NC_002951.2 :2305562-2306461 | MVR | MR150 | OK     | 225.781 | 251.262 | 0.154266   | -0.172643 | 0.86293 | 0.999883 |
| gene224  | gene224  | gutB      | gi 57650036 ref NC_002951.2 :271040-272096   | MVR | MR150 | OK     | 3.72524 | 1.78898 | -1.0582    | 1.41552   | 0.15692 | 0.774623 |
| gene2240 | gene2240 | rplC      | gi 57650036 ref NC_002951.2 :2306487-2307150 | MVR | MR150 | OK     | 215.334 | 232.76  | 0.112262   | -0.136007 | 0.89182 | 0.999883 |
| gene2241 | gene2241 | rpsJ      | gi 57650036 ref NC_002951.2 :2307177-2307486 | MVR | MR150 | OK     | 147.671 | 164.729 | 0.157704   | -0.228148 | 0.81953 | 0.999883 |
| gene2242 | gene2242 | SACOL2241 | gi 57650036 ref NC_002951.2 :2307842-2308232 | MVR | MR150 | OK     | 195.441 | 270.119 | 0.46686    | -0.624831 | 0.53208 | 0.999883 |
| gene2243 | gene2243 | SACOL2242 | gi 57650036 ref NC_002951.2 :2308423-2309758 | MVR | MR150 | OK     | 146.974 | 109.703 | -0.421947  | 0.491008  | 0.62342 | 0.999883 |
| gene2244 | gene2244 | topB      | gi 57650036 ref NC_002951.2 :2309870-2312006 | MVR | MR150 | OK     | 47.1714 | 48.9746 | 0.0541198  | -0.066274 | 0.94716 | 0.999883 |
| gene2245 | gene2245 | SACOL2245 | gi 57650036 ref NC_002951.2 :2312192-2313080 | MVR | MR150 | OK     | 26.155  | 24.0363 | -0.121871  | 0.176355  | 0.86002 | 0.999883 |
| gene2246 | gene2246 | SACOL2246 | gi 57650036 ref NC_002951.2 :2313260-2314124 | MVR | MR150 | OK     | 54.1793 | 53.7293 | -0.0120338 | 0.016385  | 0.98693 | 0.999883 |
| gene2247 | gene2247 | SACOL2247 | gi 57650036 ref NC_002951.2 :2314240-2314372 | MVR | MR150 | OK     | 62.2758 | 420.017 | 2.7537     | -1.86212  | 0.06259 | 0.504373 |
| gene2248 | gene2248 | SACOL2248 | gi 57650036 ref NC_002951.2 :2314542-2315451 | MVR | MR150 | OK     | 17.4145 | 17.9255 | 0.0417236  | -0.061085 | 0.95129 | 0.999883 |
| gene2249 | gene2249 | SACOL2250 | gi 57650036 ref NC_002951.2 :2315583-2315748 | MVR | MR150 | OK     | 126.668 | 147.519 | 0.219855   | -0.27948  | 0.77988 | 0.999883 |
| gene225  | gene225  | SACOL0234 | gi 57650036 ref NC_002951.2 :272097-272244   | MVR | MR150 | NOTEST | 0       | 0       | 0          | 0         | 1       | 1        |
| gene2250 | gene2250 | SACOL2251 | gi 57650036 ref NC_002951.2 :2315992-2316310 | MVR | MR150 | OK     | 68.6652 | 56.7177 | -0.27578   | 0.404829  | 0.6856  | 0.999883 |
| gene2251 | gene2251 | SACOL2252 | gi 57650036 ref NC_002951.2 :2316496-2319664 | MVR | MR150 | OK     | 37.7702 | 34.8897 | -0.114444  | 0.137645  | 0.89052 | 0.999883 |
| gene2252 | gene2252 | femX      | gi 57650036 ref NC_002951.2 :2319780-2321046 | MVR | MR150 | OK     | 40.0739 | 41.089  | 0.0360896  | -0.048144 | 0.9616  | 0.999883 |
| gene2253 | gene2253 | SACOL2255 | gi 57650036 ref NC_002951.2 :2321677-2322442 | MVR | MR150 | OK     | 11.456  | 12.1939 | 0.0900593  | -0.1319   | 0.89506 | 0.999883 |
| gene2254 | gene2254 | SACOL2256 | gi 57650036 ref NC_002951.2 :2322603-2324248 | MVR | MR150 | OK     | 2.14011 | 0.63371 | -1.7558    | 0.723205  | 0.46955 | 0.999883 |

|          |          |           |                                              |     |       |    |         |         |             |           |         |          |
|----------|----------|-----------|----------------------------------------------|-----|-------|----|---------|---------|-------------|-----------|---------|----------|
| gene2255 | gene2255 | SACOL2257 | gi 57650036 ref NC_002951.2 :2322603-2324248 | MVR | MR150 | OK | 1.89416 | 1.9673  | 0.0546575   | -0.068245 | 0.94559 | 0.999883 |
| gene2256 | gene2256 | sarV      | gi 57650036 ref NC_002951.2 :2324349-2324700 | MVR | MR150 | OK | 4.77187 | 15.867  | 1.73341     | -2.06407  | 0.03901 | 0.38357  |
| gene2257 | gene2257 | SACOL2259 | gi 57650036 ref NC_002951.2 :2324825-2324996 | MVR | MR150 | OK | 0       | 10.8213 | 1.79769e+30 | 1.79769e+ | 0.10824 | 0.653986 |
| gene2258 | gene2258 | SACOL2260 | gi 57650036 ref NC_002951.2 :2325052-2325196 | MVR | MR150 | OK | 0       | 37.5783 | 1.79769e+30 | 1.79769e+ | 0.10824 | 0.653986 |
| gene2259 | gene2259 | moaA      | gi 57650036 ref NC_002951.2 :2325390-2326413 | MVR | MR150 | OK | 53.6479 | 58.0531 | 0.113851    | -0.151019 | 0.87996 | 0.999883 |
| gene226  | gene226  | SACOL0235 | gi 57650036 ref NC_002951.2 :272267-273311   | MVR | MR150 | OK | 4.84948 | 2.35872 | -1.03982    | 1.43406   | 0.15156 | 0.757479 |
| gene2260 | gene2260 | mobA      | gi 57650036 ref NC_002951.2 :2326432-2327032 | MVR | MR150 | OK | 41.9706 | 47.0655 | 0.165291    | -0.238928 | 0.81116 | 0.999883 |
| gene2261 | gene2261 | moaD      | gi 57650036 ref NC_002951.2 :2327038-2327272 | MVR | MR150 | OK | 28.9618 | 53.1015 | 0.874599    | -1.15262  | 0.24907 | 0.922459 |
| gene2262 | gene2262 | moaE      | gi 57650036 ref NC_002951.2 :2327277-2327724 | MVR | MR150 | OK | 32.8278 | 40.8203 | 0.314369    | -0.461811 | 0.64422 | 0.999883 |
| gene2263 | gene2263 | mobB      | gi 57650036 ref NC_002951.2 :2327737-2329479 | MVR | MR150 | OK | 33.5995 | 52.4043 | 0.641245    | -0.43845  | 0.66106 | 0.999883 |
| gene2264 | gene2264 | SACOL2266 | gi 57650036 ref NC_002951.2 :2327737-2329479 | MVR | MR150 | OK | 27.4915 | 33.8085 | 0.298396    | -0.339983 | 0.73387 | 0.999883 |
| gene2265 | gene2265 | moaC      | gi 57650036 ref NC_002951.2 :2329541-2330036 | MVR | MR150 | OK | 105.674 | 102.143 | -0.0490318  | 0.068012  | 0.94578 | 0.999883 |
| gene2266 | gene2266 | moaB      | gi 57650036 ref NC_002951.2 :2330037-2330544 | MVR | MR150 | OK | 26.8057 | 27.9047 | 0.0579698   | -0.085208 | 0.9321  | 0.999883 |
| gene2267 | gene2267 | SACOL2269 | gi 57650036 ref NC_002951.2 :2330574-2331579 | MVR | MR150 | OK | 26.2065 | 28.3437 | 0.113103    | -0.161288 | 0.87187 | 0.999883 |
| gene2268 | gene2268 | modC      | gi 57650036 ref NC_002951.2 :2331748-2332354 | MVR | MR150 | OK | 50.0344 | 52.4027 | 0.066721    | -0.095611 | 0.92383 | 0.999883 |
| gene2269 | gene2269 | modB      | gi 57650036 ref NC_002951.2 :2332354-2333026 | MVR | MR150 | OK | 45.9346 | 48.3245 | 0.0731717   | -0.104325 | 0.91691 | 0.999883 |
| gene227  | gene227  | ispD      | gi 57650036 ref NC_002951.2 :273838-275573   | MVR | MR150 | OK | 32.3757 | 39.6796 | 0.293486    | -0.22684  | 0.82055 | 0.999883 |
| gene2270 | gene2270 | modA      | gi 57650036 ref NC_002951.2 :2333039-2333822 | MVR | MR150 | OK | 99.2628 | 107.147 | 0.110269    | -0.142364 | 0.88679 | 0.999883 |
| gene2271 | gene2271 | fdhD      | gi 57650036 ref NC_002951.2 :2334111-2334909 | MVR | MR150 | OK | 155.752 | 202.778 | 0.380649    | -0.459379 | 0.64596 | 0.999883 |
| gene2272 | gene2272 | SACOL2274 | gi 57650036 ref NC_002951.2 :2335080-2335851 | MVR | MR150 | OK | 5.55832 | 6.70327 | 0.270218    | -0.38178  | 0.70263 | 0.999883 |
| gene2273 | gene2273 | SACOL2275 | gi 57650036 ref NC_002951.2 :2335922-2336477 | MVR | MR150 | OK | 4.94203 | 4.31077 | -0.197157   | 0.254007  | 0.79949 | 0.999883 |
| gene2274 | gene2274 | SACOL2276 | gi 57650036 ref NC_002951.2 :2336597-2337539 | MVR | MR150 | OK | 6.27112 | 5.57197 | -0.170536   | 0.245247  | 0.80627 | 0.999883 |
| gene2275 | gene2275 | SACOL2277 | gi 57650036 ref NC_002951.2 :2337937-2338846 | MVR | MR150 | OK | 56.341  | 33.0434 | -0.769825   | 1.06346   | 0.28757 | 0.975616 |
| gene2276 | gene2276 | SACOL2278 | gi 57650036 ref NC_002951.2 :2339059-2340214 | MVR | MR150 | OK | 39.6366 | 43.2971 | 0.127436    | -0.171607 | 0.86375 | 0.999883 |
| gene2277 | gene2277 | SACOL2279 | gi 57650036 ref NC_002951.2 :2340430-2341336 | MVR | MR150 | OK | 6.3448  | 3.03642 | -1.0632     | 1.4778    | 0.13946 | 0.736061 |
| gene2278 | gene2278 | ureA      | gi 57650036 ref NC_002951.2 :2341595-2341898 | MVR | MR150 | OK | 0.61218 | 1.38047 | 1.17313     | -0.528287 | 0.5973  | 0.999883 |
| gene2279 | gene2279 | ureB      | gi 57650036 ref NC_002951.2 :2341911-2344034 | MVR | MR150 | OK | 2.77445 | 2.16612 | -0.357089   | 0.158963  | 0.8737  | 0.999883 |
| gene228  | gene228  | SACOL0237 | gi 57650036 ref NC_002951.2 :273838-275573   | MVR | MR150 | OK | 36.0934 | 47.4604 | 0.394991    | -0.416689 | 0.67691 | 0.999883 |
| gene2280 | gene2280 | ureC      | gi 57650036 ref NC_002951.2 :2341911-2344034 | MVR | MR150 | OK | 3.41048 | 2.72789 | -0.32219    | 0.4438    | 0.65719 | 0.999883 |
| gene2281 | gene2281 | ureE      | gi 57650036 ref NC_002951.2 :2344046-2345181 | MVR | MR150 | OK | 4.82406 | 8.45557 | 0.809655    | -0.763114 | 0.4454  | 0.999883 |
| gene2282 | gene2282 | ureF      | gi 57650036 ref NC_002951.2 :2344046-2345181 | MVR | MR150 | OK | 2.7601  | 5.31115 | 0.944302    | -0.971927 | 0.33109 | 0.999883 |
| gene2283 | gene2283 | ureG      | gi 57650036 ref NC_002951.2 :2345193-2346644 | MVR | MR150 | OK | 9.86666 | 9.58958 | -0.0410948  | 0.038321  | 0.96943 | 0.999883 |
| gene2284 | gene2284 | ureD      | gi 57650036 ref NC_002951.2 :2345193-2346644 | MVR | MR150 | OK | 8.2033  | 10.3357 | 0.333366    | -0.377192 | 0.70603 | 0.999883 |

|          |          |           |                                              |     |       |    |         |         |            |           |         |          |
|----------|----------|-----------|----------------------------------------------|-----|-------|----|---------|---------|------------|-----------|---------|----------|
| gene2285 | gene2285 | sarR      | gi 57650036 ref NC_002951.2 :2346832-2347180 | MVR | MR150 | OK | 39.3669 | 51.5113 | 0.387907   | -0.566794 | 0.57085 | 0.999883 |
| gene2286 | gene2286 | SACOL2288 | gi 57650036 ref NC_002951.2 :2347607-2347934 | MVR | MR150 | OK | 137.301 | 177.102 | 0.367244   | -0.526696 | 0.59841 | 0.999883 |
| gene2287 | gene2287 | sarY      | gi 57650036 ref NC_002951.2 :2347997-2348741 | MVR | MR150 | OK | 3.48557 | 1.97001 | -0.823195  | 1.03219   | 0.30198 | 0.987552 |
| gene2288 | gene2288 | SACOL2290 | gi 57650036 ref NC_002951.2 :2348766-2350722 | MVR | MR150 | OK | 3.41075 | 2.70405 | -0.334969  | 0.486768  | 0.62642 | 0.999883 |
| gene2289 | gene2289 | SACOL2291 | gi 57650036 ref NC_002951.2 :2351331-2352135 | MVR | MR150 | OK | 255.457 | 423.329 | 0.728698   | -0.820241 | 0.41208 | 0.999883 |
| gene229  | gene229  | SACOL0238 | gi 57650036 ref NC_002951.2 :275594-277289   | MVR | MR150 | OK | 36.4206 | 42.2101 | 0.212835   | -0.275132 | 0.78322 | 0.999883 |
| gene2290 | gene2290 | nhaC      | gi 57650036 ref NC_002951.2 :2352567-2353968 | MVR | MR150 | OK | 6.01247 | 6.37618 | 0.0847357  | -0.124426 | 0.90098 | 0.999883 |
| gene2291 | gene2291 | SACOL2293 | gi 57650036 ref NC_002951.2 :2354062-2355145 | MVR | MR150 | OK | 6.73982 | 4.50918 | -0.579847  | 0.837714  | 0.40219 | 0.999883 |
| gene2292 | gene2292 | SACOL2294 | gi 57650036 ref NC_002951.2 :2355392-2355815 | MVR | MR150 | OK | 82.847  | 80.7154 | -0.0376068 | 0.054357  | 0.95665 | 0.999883 |
| gene2293 | gene2293 | SACOL2295 | gi 57650036 ref NC_002951.2 :2356051-2356552 | MVR | MR150 | OK | 1361.21 | 1663.33 | 0.289186   | -0.302394 | 0.76235 | 0.999883 |
| gene2294 | gene2294 | SACOL2296 | gi 57650036 ref NC_002951.2 :2356913-2357867 | MVR | MR150 | OK | 190.329 | 193.542 | 0.0241466  | -0.0281   | 0.97758 | 0.999883 |
| gene2295 | gene2295 | SACOL2297 | gi 57650036 ref NC_002951.2 :2357958-2359083 | MVR | MR150 | OK | 25.0539 | 22.0193 | -0.186269  | 0.265787  | 0.7904  | 0.999883 |
| gene2296 | gene2296 | SACOL2298 | gi 57650036 ref NC_002951.2 :2359393-2360170 | MVR | MR150 | OK | 31.8252 | 26.0038 | -0.291449  | 0.42247   | 0.67268 | 0.999883 |
| gene2297 | gene2297 | SACOL2299 | gi 57650036 ref NC_002951.2 :2360191-2360443 | MVR | MR150 | OK | 24.0272 | 24.5289 | 0.0298131  | -0.038203 | 0.96953 | 0.999883 |
| gene2298 | gene2298 | SACOL2300 | gi 57650036 ref NC_002951.2 :2360652-2364080 | MVR | MR150 | OK | 453.907 | 426.328 | -0.0904338 | 0.038619  | 0.96919 | 0.999883 |
| gene2299 | gene2299 | SACOL2301 | gi 57650036 ref NC_002951.2 :2360652-2364080 | MVR | MR150 | OK | 199.209 | 201.334 | 0.0153086  | -0.014259 | 0.98862 | 0.999883 |
| gene23   | gene23   | yycI      | gi 57650036 ref NC_002951.2 :28819-29608     | MVR | MR150 | OK | 98.8301 | 99.0379 | 0.00303069 | -0.003926 | 0.99687 | 0.999883 |
| gene230  | gene230  | SACOL0239 | gi 57650036 ref NC_002951.2 :277716-278886   | MVR | MR150 | OK | 31.9609 | 35.5232 | 0.152455   | -0.209452 | 0.8341  | 0.999883 |
| gene2300 | gene2300 | SACOL2302 | gi 57650036 ref NC_002951.2 :2364681-2365635 | MVR | MR150 | OK | 26.1142 | 27.4167 | 0.0702208  | -0.100742 | 0.91976 | 0.999883 |
| gene2301 | gene2301 | SACOL2303 | gi 57650036 ref NC_002951.2 :2365761-2366559 | MVR | MR150 | OK | 40.3386 | 39.429  | -0.0329047 | 0.04664   | 0.9628  | 0.999883 |
| gene2302 | gene2302 | SACOL2304 | gi 57650036 ref NC_002951.2 :2366943-2367636 | MVR | MR150 | OK | 52.2314 | 63.6567 | 0.285397   | -0.397985 | 0.69064 | 0.999883 |
| gene2303 | gene2303 | SACOL2305 | gi 57650036 ref NC_002951.2 :2367991-2369020 | MVR | MR150 | OK | 3.90157 | 3.78043 | -0.0455044 | 0.013145  | 0.98951 | 0.999883 |
| gene2304 | gene2304 | SACOL2306 | gi 57650036 ref NC_002951.2 :2367991-2369020 | MVR | MR150 | OK | 16.9487 | 23.619  | 0.478772   | -0.687542 | 0.49174 | 0.999883 |
| gene2305 | gene2305 | SACOL2307 | gi 57650036 ref NC_002951.2 :2369068-2369398 | MVR | MR150 | OK | 1.49907 | 1.13418 | -0.402419  | 0.2519    | 0.80112 | 0.999883 |
| gene2306 | gene2306 | SACOL2308 | gi 57650036 ref NC_002951.2 :2369842-2370715 | MVR | MR150 | OK | 90.729  | 105.112 | 0.212295   | -0.271246 | 0.7862  | 0.999883 |
| gene2307 | gene2307 | SACOL2309 | gi 57650036 ref NC_002951.2 :2371101-2372481 | MVR | MR150 | OK | 166.651 | 132.129 | -0.334886  | 0.381523  | 0.70282 | 0.999883 |
| gene2308 | gene2308 | SACOL2310 | gi 57650036 ref NC_002951.2 :2372760-2373299 | MVR | MR150 | OK | 70.566  | 63.1461 | -0.16028   | 0.172903  | 0.86273 | 0.999883 |
| gene2309 | gene2309 | SACOL2311 | gi 57650036 ref NC_002951.2 :2372760-2373299 | MVR | MR150 | OK | 365.7   | 404.935 | 0.147029   | -0.140377 | 0.88836 | 0.999883 |
| gene231  | gene231  | ispD      | gi 57650036 ref NC_002951.2 :279161-280896   | MVR | MR150 | OK | 39.4912 | 41.1602 | 0.0597167  | -0.033998 | 0.97288 | 0.999883 |
| gene2310 | gene2310 | SACOL2312 | gi 57650036 ref NC_002951.2 :2373394-2373586 | MVR | MR150 | OK | 91.2101 | 60.0473 | -0.603095  | 0.787848  | 0.43079 | 0.999883 |
| gene2311 | gene2311 | SACOL2313 | gi 57650036 ref NC_002951.2 :2373596-2374232 | MVR | MR150 | OK | 16.6007 | 17.203  | 0.0514147  | -0.075461 | 0.93985 | 0.999883 |
| gene2312 | gene2312 | SACOL2314 | gi 57650036 ref NC_002951.2 :2374306-2375224 | MVR | MR150 | OK | 7.24623 | 7.46424 | 0.0427633  | -0.062118 | 0.95047 | 0.999883 |
| gene2313 | gene2313 | SACOL2315 | gi 57650036 ref NC_002951.2 :2375491-2376022 | MVR | MR150 | OK | 11.603  | 16.1793 | 0.479657   | -0.689041 | 0.4908  | 0.999883 |

|          |          |           |                                              |     |       |        |         |         |            |           |         |          |
|----------|----------|-----------|----------------------------------------------|-----|-------|--------|---------|---------|------------|-----------|---------|----------|
| gene2314 | gene2314 | SACOL2316 | gi 57650036 ref NC_002951.2 :2376087-2377692 | MVR | MR150 | OK     | 10.376  | 12.2094 | 0.234741   | -0.34078  | 0.73327 | 0.999883 |
| gene2315 | gene2315 | SACOL2317 | gi 57650036 ref NC_002951.2 :2378021-2378786 | MVR | MR150 | OK     | 14.8064 | 19.5103 | 0.39802    | -0.584621 | 0.5588  | 0.999883 |
| gene2316 | gene2316 | SACOL2318 | gi 57650036 ref NC_002951.2 :2378843-2379350 | MVR | MR150 | OK     | 121.656 | 147.995 | 0.282731   | -0.380172 | 0.70382 | 0.999883 |
| gene2317 | gene2317 | SACOL2319 | gi 57650036 ref NC_002951.2 :2379516-2380830 | MVR | MR150 | OK     | 9.97981 | 7.97381 | -0.323743  | 0.475674  | 0.63431 | 0.999883 |
| gene2318 | gene2318 | SACOL2320 | gi 57650036 ref NC_002951.2 :2381054-2381624 | MVR | MR150 | OK     | 9.62628 | 10.7544 | 0.159873   | -0.227143 | 0.82031 | 0.999883 |
| gene2319 | gene2319 | SACOL2321 | gi 57650036 ref NC_002951.2 :2382110-2382992 | MVR | MR150 | OK     | 49.3209 | 50.2914 | 0.0281112  | -0.03849  | 0.9693  | 0.999883 |
| gene232  | gene232  | SACOL0241 | gi 57650036 ref NC_002951.2 :279161-280896   | MVR | MR150 | OK     | 90.7803 | 89.7299 | -0.0167906 | 0.01816   | 0.98551 | 0.999883 |
| gene2320 | gene2320 | SACOL2322 | gi 57650036 ref NC_002951.2 :2383102-2384224 | MVR | MR150 | OK     | 18.8206 | 18.2707 | -0.0427856 | 0.061927  | 0.95062 | 0.999883 |
| gene2321 | gene2321 | hutI      | gi 57650036 ref NC_002951.2 :2384500-2387400 | MVR | MR150 | OK     | 19.6479 | 20.7834 | 0.081055   | -0.081317 | 0.93519 | 0.999883 |
| gene2322 | gene2322 | hutU      | gi 57650036 ref NC_002951.2 :2384500-2387400 | MVR | MR150 | OK     | 12.6899 | 10.5811 | -0.262186  | 0.23662   | 0.81295 | 0.999883 |
| gene2323 | gene2323 | SACOL2325 | gi 57650036 ref NC_002951.2 :2387559-2388444 | MVR | MR150 | OK     | 37.3315 | 44.7065 | 0.260088   | -0.363051 | 0.71657 | 0.999883 |
| gene2324 | gene2324 | fosB      | gi 57650036 ref NC_002951.2 :2388865-2389285 | MVR | MR150 | OK     | 37.4541 | 34.6585 | -0.111914  | 0.164404  | 0.86941 | 0.999883 |
| gene2325 | gene2325 | hutG      | gi 57650036 ref NC_002951.2 :2389540-2390476 | MVR | MR150 | OK     | 28.3346 | 27.2547 | -0.0560607 | 0.080367  | 0.93595 | 0.999883 |
| gene2326 | gene2326 | SACOL2328 | gi 57650036 ref NC_002951.2 :2390765-2392025 | MVR | MR150 | OK     | 179.288 | 195.049 | 0.121558   | -0.136727 | 0.89125 | 0.999883 |
| gene2327 | gene2327 | rpiA      | gi 57650036 ref NC_002951.2 :2392090-2392777 | MVR | MR150 | OK     | 32.3255 | 32.063  | -0.0117621 | 0.017097  | 0.98636 | 0.999883 |
| gene2328 | gene2328 | SACOL2330 | gi 57650036 ref NC_002951.2 :2392950-2393604 | MVR | MR150 | OK     | 36.1636 | 53.9477 | 0.577022   | -0.8261   | 0.40875 | 0.999883 |
| gene2329 | gene2329 | SACOL2331 | gi 57650036 ref NC_002951.2 :2393733-2394859 | MVR | MR150 | NOTEST | 0       | 0       | 0          | 0         | 1       | 1        |
| gene233  | gene233  | SACOL0242 | gi 57650036 ref NC_002951.2 :280917-282606   | MVR | MR150 | OK     | 68.9076 | 80.2343 | 0.219557   | -0.263323 | 0.7923  | 0.999883 |
| gene2330 | gene2330 | galM      | gi 57650036 ref NC_002951.2 :2393733-2394859 | MVR | MR150 | OK     | 7.05267 | 8.03017 | 0.187261   | -0.271782 | 0.78579 | 0.999883 |
| gene2331 | gene2331 | SACOL2333 | gi 57650036 ref NC_002951.2 :2394888-2395215 | MVR | MR150 | OK     | 14.8019 | 12.7328 | -0.217231  | 0.282768  | 0.77736 | 0.999883 |
| gene2332 | gene2332 | SACOL2334 | gi 57650036 ref NC_002951.2 :2395432-2397557 | MVR | MR150 | OK     | 24.7493 | 21.4971 | -0.20325   | 0.225794  | 0.82136 | 0.999883 |
| gene2333 | gene2333 | SACOL2335 | gi 57650036 ref NC_002951.2 :2395432-2397557 | MVR | MR150 | OK     | 17.3867 | 16.8434 | -0.0458079 | 0.035964  | 0.97131 | 0.999883 |
| gene2334 | gene2334 | SACOL2336 | gi 57650036 ref NC_002951.2 :2397626-2397725 | MVR | MR150 | NOTEST | 0       | 0       | 0          | 0         | 1       | 1        |
| gene2335 | gene2335 | SACOL2338 | gi 57650036 ref NC_002951.2 :2397787-2398435 | MVR | MR150 | OK     | 33.5037 | 27.6765 | -0.27566   | 0.402664  | 0.6872  | 0.999883 |
| gene2336 | gene2336 | SACOL2339 | gi 57650036 ref NC_002951.2 :2398833-2399442 | MVR | MR150 | OK     | 6.6801  | 5.98776 | -0.157852  | 0.216562  | 0.82855 | 0.999883 |
| gene2337 | gene2337 | gltS      | gi 57650036 ref NC_002951.2 :2399778-2400987 | MVR | MR150 | OK     | 25.7678 | 41.2843 | 0.680025   | -0.932362 | 0.35115 | 0.999883 |
| gene2338 | gene2338 | fni       | gi 57650036 ref NC_002951.2 :2401034-2402084 | MVR | MR150 | OK     | 50.125  | 53.3274 | 0.0893468  | -0.119034 | 0.90525 | 0.999883 |
| gene2339 | gene2339 | SACOL2342 | gi 57650036 ref NC_002951.2 :2402114-2403062 | MVR | MR150 | OK     | 16.1537 | 22.7233 | 0.492311   | -0.716958 | 0.4734  | 0.999883 |
| gene234  | gene234  | SACOL0243 | gi 57650036 ref NC_002951.2 :282641-284363   | MVR | MR150 | OK     | 139.543 | 158.399 | 0.182853   | -0.20287  | 0.83924 | 0.999883 |
| gene2340 | gene2340 | SACOL2343 | gi 57650036 ref NC_002951.2 :2403158-2404066 | MVR | MR150 | OK     | 69.1971 | 74.3795 | 0.104193   | -0.112824 | 0.91017 | 0.999883 |
| gene2341 | gene2341 | SACOL2344 | gi 57650036 ref NC_002951.2 :2403158-2404066 | MVR | MR150 | OK     | 56.0337 | 60.9989 | 0.12249    | -0.103474 | 0.91759 | 0.999883 |
| gene2342 | gene2342 | SACOL2345 | gi 57650036 ref NC_002951.2 :2404173-2405076 | MVR | MR150 | OK     | 41.7678 | 42.4733 | 0.0241659  | -0.033558 | 0.97323 | 0.999883 |
| gene2343 | gene2343 | SACOL2346 | gi 57650036 ref NC_002951.2 :2405301-2405940 | MVR | MR150 | OK     | 27.3272 | 36.2631 | 0.408166   | -0.595486 | 0.55152 | 0.999883 |



|          |          |           |                                              |     |       |        |         |         |            |           |         |          |
|----------|----------|-----------|----------------------------------------------|-----|-------|--------|---------|---------|------------|-----------|---------|----------|
| gene2344 | gene2344 | SACOL2347 | gi 57650036 ref NC_002951.2 :2406185-2408117 | MVR | MR150 | OK     | 5.47908 | 5.12927 | -0.0951788 | 0.13996   | 0.88869 | 0.999883 |
| gene2345 | gene2345 | SACOL2348 | gi 57650036 ref NC_002951.2 :2408129-2408777 | MVR | MR150 | OK     | 4.96351 | 5.80865 | 0.226841   | -0.308465 | 0.75773 | 0.999883 |
| gene2346 | gene2346 | SACOL2349 | gi 57650036 ref NC_002951.2 :2408897-2409449 | MVR | MR150 | OK     | 44.7049 | 46.9524 | 0.0707667  | -0.102775 | 0.91814 | 0.999883 |
| gene2347 | gene2347 | tcaB      | gi 57650036 ref NC_002951.2 :2409678-2410887 | MVR | MR150 | OK     | 11.3402 | 10.9282 | -0.0533906 | 0.078349  | 0.93755 | 0.999883 |
| gene2348 | gene2348 | SACOL2351 | gi 57650036 ref NC_002951.2 :2410996-2411125 | MVR | MR150 | NOTEST | 0       | 0       | 0          | 0         | 1       | 1        |
| gene2349 | gene2349 | tcaA      | gi 57650036 ref NC_002951.2 :2411155-2412538 | MVR | MR150 | OK     | 9.53719 | 12.5579 | 0.396964   | -0.580112 | 0.56184 | 0.999883 |
| gene235  | gene235  | scdA      | gi 57650036 ref NC_002951.2 :284502-285177   | MVR | MR150 | OK     | 57.2959 | 39.9625 | -0.519784  | 0.738852  | 0.46    | 0.999883 |
| gene2350 | gene2350 | tcaR      | gi 57650036 ref NC_002951.2 :2412777-2413233 | MVR | MR150 | OK     | 42.3677 | 50.7412 | 0.260193   | -0.381396 | 0.70291 | 0.999883 |
| gene2351 | gene2351 | SACOL2354 | gi 57650036 ref NC_002951.2 :2413427-2414396 | MVR | MR150 | OK     | 11.0675 | 13.3415 | 0.269599   | -0.396249 | 0.69192 | 0.999883 |
| gene2352 | gene2352 | SACOL2355 | gi 57650036 ref NC_002951.2 :2414970-2415327 | MVR | MR150 | OK     | 0.8351  | 3.82704 | 2.19621    | -1.46965  | 0.14166 | 0.740572 |
| gene2353 | gene2353 | SACOL2356 | gi 57650036 ref NC_002951.2 :2415466-2417187 | MVR | MR150 | OK     | 3.43892 | 1.64249 | -1.06607   | 0.873379  | 0.38246 | 0.999883 |
| gene2354 | gene2354 | SACOL2357 | gi 57650036 ref NC_002951.2 :2415466-2417187 | MVR | MR150 | OK     | 2.88179 | 1.96788 | -0.550327  | 0.618733  | 0.53609 | 0.999883 |
| gene2355 | gene2355 | SACOL2358 | gi 57650036 ref NC_002951.2 :2417322-2419363 | MVR | MR150 | OK     | 9.4629  | 9.0238  | -0.0685473 | 0.033163  | 0.97355 | 0.999883 |
| gene2356 | gene2356 | SACOL2359 | gi 57650036 ref NC_002951.2 :2417322-2419363 | MVR | MR150 | OK     | 24.5635 | 26.7434 | 0.122664   | -0.156693 | 0.87549 | 0.999883 |
| gene2357 | gene2357 | SACOL2360 | gi 57650036 ref NC_002951.2 :2419525-2420421 | MVR | MR150 | OK     | 10.2953 | 13.7722 | 0.419767   | -0.420906 | 0.67382 | 0.999883 |
| gene2358 | gene2358 | SACOL2361 | gi 57650036 ref NC_002951.2 :2419525-2420421 | MVR | MR150 | OK     | 10.5293 | 14.9239 | 0.503221   | -0.531015 | 0.59541 | 0.999883 |
| gene2359 | gene2359 | mqa1      | gi 57650036 ref NC_002951.2 :2420486-2421965 | MVR | MR150 | OK     | 183.939 | 237.582 | 0.369198   | -0.402988 | 0.68696 | 0.999883 |
| gene236  | gene236  | lytS      | gi 57650036 ref NC_002951.2 :285423-287178   | MVR | MR150 | OK     | 11.8046 | 11.426  | -0.0470322 | 0.067878  | 0.94588 | 0.999883 |
| gene2360 | gene2360 | SACOL2363 | gi 57650036 ref NC_002951.2 :2422345-2423944 | MVR | MR150 | OK     | 25.0536 | 16.0936 | -0.638535  | 0.88905   | 0.37398 | 0.999883 |
| gene2361 | gene2361 | SACOL2364 | gi 57650036 ref NC_002951.2 :2424260-2425934 | MVR | MR150 | OK     | 15.9731 | 17.561  | 0.136725   | -0.192988 | 0.84697 | 0.999883 |
| gene2362 | gene2362 | SACOL2365 | gi 57650036 ref NC_002951.2 :2426086-2426716 | MVR | MR150 | OK     | 67.5267 | 51.6165 | -0.387628  | 0.546518  | 0.58471 | 0.999883 |
| gene2363 | gene2363 | SACOL2366 | gi 57650036 ref NC_002951.2 :2427029-2427545 | MVR | MR150 | OK     | 13.1936 | 10.1671 | -0.375921  | 0.532658  | 0.59427 | 0.999883 |
| gene2364 | gene2364 | SACOL2367 | gi 57650036 ref NC_002951.2 :2427735-2428740 | MVR | MR150 | OK     | 28.6026 | 28.7242 | 0.00612147 | -0.008696 | 0.99306 | 0.999883 |
| gene2365 | gene2365 | SACOL2368 | gi 57650036 ref NC_002951.2 :2428785-2429187 | MVR | MR150 | OK     | 7.42372 | 9.79292 | 0.399597   | -0.516    | 0.60585 | 0.999883 |
| gene2366 | gene2366 | SACOL2369 | gi 57650036 ref NC_002951.2 :2429222-2430257 | MVR | MR150 | OK     | 14.3493 | 9.53654 | -0.589442  | 0.865306  | 0.38687 | 0.999883 |
| gene2367 | gene2367 | SACOL2371 | gi 57650036 ref NC_002951.2 :2430488-2430920 | MVR | MR150 | OK     | 58.7971 | 40.7923 | -0.527448  | 0.773845  | 0.43902 | 0.999883 |
| gene2368 | gene2368 | SACOL2372 | gi 57650036 ref NC_002951.2 :2430971-2431064 | MVR | MR150 | NOTEST | 0       | 0       | 0          | 0         | 1       | 1        |
| gene2369 | gene2369 | SACOL2373 | gi 57650036 ref NC_002951.2 :2431126-2432404 | MVR | MR150 | OK     | 6.93588 | 4.12    | -0.751434  | 1.09285   | 0.27446 | 0.959546 |
| gene237  | gene237  | lytR      | gi 57650036 ref NC_002951.2 :287180-287921   | MVR | MR150 | OK     | 9.0472  | 16.6964 | 0.883991   | -1.28854  | 0.19756 | 0.861283 |
| gene2370 | gene2370 | SACOL2374 | gi 57650036 ref NC_002951.2 :2432564-2433188 | MVR | MR150 | OK     | 25.5739 | 27.4366 | 0.10143    | -0.148865 | 0.88166 | 0.999883 |
| gene2371 | gene2371 | SACOL2375 | gi 57650036 ref NC_002951.2 :2433233-2434178 | MVR | MR150 | OK     | 51.9879 | 64.3336 | 0.307397   | -0.410495 | 0.68144 | 0.999883 |
| gene2372 | gene2372 | SACOL2376 | gi 57650036 ref NC_002951.2 :2434263-2435706 | MVR | MR150 | OK     | 4.41399 | 4.06613 | -0.118428  | 0.172061  | 0.86339 | 0.999883 |
| gene2373 | gene2373 | SACOL2377 | gi 57650036 ref NC_002951.2 :2435888-2436272 | MVR | MR150 | OK     | 92.1258 | 79.938  | -0.204724  | 0.297812  | 0.76585 | 0.999883 |

|          |          |           |                                              |     |       |        |         |         |            |           |         |          |
|----------|----------|-----------|----------------------------------------------|-----|-------|--------|---------|---------|------------|-----------|---------|----------|
| gene2374 | gene2374 | SACOL2378 | gi 57650036 ref NC_002951.2 :2437759-2439865 | MVR | MR150 | OK     | 17.1865 | 20.091  | 0.225274   | -0.306694 | 0.75908 | 0.999883 |
| gene2375 | gene2375 | SACOL2379 | gi 57650036 ref NC_002951.2 :2439935-2440358 | MVR | MR150 | OK     | 139.532 | 158.011 | 0.179427   | -0.247063 | 0.80486 | 0.999883 |
| gene2376 | gene2376 | SACOL2380 | gi 57650036 ref NC_002951.2 :2440453-2440576 | MVR | MR150 | NOTEST | 0       | 0       | 0          | 0         | 1       | 1        |
| gene2377 | gene2377 | SACOL2381 | gi 57650036 ref NC_002951.2 :2440622-2440979 | MVR | MR150 | OK     | 29.6461 | 35.4001 | 0.255911   | -0.370102 | 0.71131 | 0.999883 |
| gene2378 | gene2378 | SACOL2382 | gi 57650036 ref NC_002951.2 :2441382-2442660 | MVR | MR150 | OK     | 148.15  | 131.556 | -0.171386  | 0.19848   | 0.84267 | 0.999883 |
| gene2379 | gene2379 | SACOL2383 | gi 57650036 ref NC_002951.2 :2442841-2443207 | MVR | MR150 | OK     | 34.3651 | 42.6942 | 0.313097   | -0.456979 | 0.64769 | 0.999883 |
| gene238  | gene238  | lrgA      | gi 57650036 ref NC_002951.2 :288033-289171   | MVR | MR150 | OK     | 2.37584 | 0.62601 | -1.92419   | 0.966909  | 0.33359 | 0.999883 |
| gene2380 | gene2380 | sarZ      | gi 57650036 ref NC_002951.2 :2443604-2444051 | MVR | MR150 | OK     | 14.5901 | 14.2253 | -0.0365377 | 0.051636  | 0.95882 | 0.999883 |
| gene2381 | gene2381 | SACOL2385 | gi 57650036 ref NC_002951.2 :2444266-2444695 | MVR | MR150 | OK     | 175.192 | 145.28  | -0.270101  | 0.368191  | 0.71273 | 0.999883 |
| gene2382 | gene2382 | SACOL2386 | gi 57650036 ref NC_002951.2 :2444801-2445971 | MVR | MR150 | OK     | 2.59643 | 2.05245 | -0.339184  | 0.458024  | 0.64694 | 0.999883 |
| gene2383 | gene2383 | SACOL2387 | gi 57650036 ref NC_002951.2 :2446340-2447974 | MVR | MR150 | OK     | 1.69248 | 0.42832 | -1.98239   | 1.3544    | 0.17561 | 0.821477 |
| gene2384 | gene2384 | SACOL2388 | gi 57650036 ref NC_002951.2 :2446340-2447974 | MVR | MR150 | OK     | 2.60107 | 1.98092 | -0.392931  | 0.41054   | 0.68141 | 0.999883 |
| gene2385 | gene2385 | SACOL2389 | gi 57650036 ref NC_002951.2 :2448231-2448885 | MVR | MR150 | OK     | 32.085  | 37.7634 | 0.235088   | -0.341505 | 0.73272 | 0.999883 |
| gene2386 | gene2386 | SACOL2390 | gi 57650036 ref NC_002951.2 :2448907-2449942 | MVR | MR150 | OK     | 30.1407 | 36.8624 | 0.290436   | -0.405476 | 0.68513 | 0.999883 |
| gene2387 | gene2387 | SACOL2391 | gi 57650036 ref NC_002951.2 :2449965-2450418 | MVR | MR150 | OK     | 26.4054 | 32.6143 | 0.304676   | -0.446653 | 0.65513 | 0.999883 |
| gene2388 | gene2388 | narI      | gi 57650036 ref NC_002951.2 :2450437-2456914 | MVR | MR150 | OK     | 19.3159 | 19.5357 | 0.0163224  | -0.018327 | 0.98538 | 0.999883 |
| gene2389 | gene2389 | narJ      | gi 57650036 ref NC_002951.2 :2450437-2456914 | MVR | MR150 | NOTEST | 0.637   | 0.78289 | 0.29752    | -0.056671 | 0.95481 | 1        |
| gene239  | gene239  | lrgB      | gi 57650036 ref NC_002951.2 :288033-289171   | MVR | MR150 | OK     | 3.91397 | 2.1347  | -0.874597  | 1.02444   | 0.30563 | 0.990962 |
| gene2390 | gene2390 | narH      | gi 57650036 ref NC_002951.2 :2450437-2456914 | MVR | MR150 | OK     | 2.14509 | 1.23881 | -0.792087  | 0.441753  | 0.65867 | 0.999883 |
| gene2391 | gene2391 | narG      | gi 57650036 ref NC_002951.2 :2450437-2456914 | MVR | MR150 | OK     | 1.63702 | 0.35115 | -2.22093   | 1.2536    | 0.20999 | 0.888513 |
| gene2392 | gene2392 | SACOL2396 | gi 57650036 ref NC_002951.2 :2457223-2458506 | MVR | MR150 | OK     | 6.28204 | 5.11744 | -0.295809  | 0.415816  | 0.67754 | 0.999883 |
| gene2393 | gene2393 | nirD      | gi 57650036 ref NC_002951.2 :2457223-2458506 | MVR | MR150 | OK     | 2.78684 | 1.26014 | -1.14504   | 0.340675  | 0.73335 | 0.999883 |
| gene2394 | gene2394 | nirB      | gi 57650036 ref NC_002951.2 :2458509-2460915 | MVR | MR150 | OK     | 2.30534 | 1.3193  | -0.805202  | 1.14432   | 0.25249 | 0.92853  |
| gene2395 | gene2395 | nirR      | gi 57650036 ref NC_002951.2 :2460980-2461712 | MVR | MR150 | OK     | 4.48861 | 0.86332 | -2.3783    | 2.66757   | 0.00764 | 0.141411 |
| gene2396 | gene2396 | SACOL2400 | gi 57650036 ref NC_002951.2 :2461941-2462478 | MVR | MR150 | OK     | 10.4491 | 15.8919 | 0.604914   | -0.865795 | 0.3866  | 0.999883 |
| gene2397 | gene2397 | SACOL2401 | gi 57650036 ref NC_002951.2 :2462710-2463535 | MVR | MR150 | OK     | 13.6207 | 15.4336 | 0.180274   | -0.265035 | 0.79098 | 0.999883 |
| gene2398 | gene2398 | SACOL2402 | gi 57650036 ref NC_002951.2 :2464017-2464485 | MVR | MR150 | OK     | 18.136  | 21.1059 | 0.21879    | -0.317103 | 0.75117 | 0.999883 |
| gene2399 | gene2399 | SACOL2403 | gi 57650036 ref NC_002951.2 :2464670-2466221 | MVR | MR150 | OK     | 4.98038 | 5.78181 | 0.215264   | -0.315883 | 0.75209 | 0.999883 |
| gene24   | gene24   | yycJ      | gi 57650036 ref NC_002951.2 :29997-30798     | MVR | MR150 | OK     | 55.836  | 59.1032 | 0.0820399  | -0.112161 | 0.9107  | 0.999883 |
| gene240  | gene240  | SACOL0249 | gi 57650036 ref NC_002951.2 :289278-289983   | MVR | MR150 | OK     | 45.9456 | 58.5075 | 0.348694   | -0.489849 | 0.62424 | 0.999883 |
| gene2400 | gene2400 | SACOL2404 | gi 57650036 ref NC_002951.2 :2466515-2467033 | MVR | MR150 | OK     | 12.7354 | 17.086  | 0.423966   | -0.290228 | 0.77164 | 0.999883 |
| gene2401 | gene2401 | SACOL2405 | gi 57650036 ref NC_002951.2 :2466515-2467033 | MVR | MR150 | OK     | 51.0578 | 69.1268 | 0.437115   | -0.555058 | 0.57886 | 0.999883 |
| gene2402 | gene2402 | SACOL2406 | gi 57650036 ref NC_002951.2 :2467197-2467296 | MVR | MR150 | NOTEST | 0       | 0       | 0          | 0         | 1       | 1        |

|          |          |           |                                              |     |       |        |         |         |            |           |         |           |
|----------|----------|-----------|----------------------------------------------|-----|-------|--------|---------|---------|------------|-----------|---------|-----------|
| gene2403 | gene2403 | SACOL2407 | gi 57650036 ref NC_002951.2 :2467305-2467905 | MVR | MR150 | OK     | 55.8054 | 60.4582 | 0.115533   | -0.164196 | 0.86958 | 0.999883  |
| gene2404 | gene2404 | SACOL2408 | gi 57650036 ref NC_002951.2 :2467923-2468295 | MVR | MR150 | OK     | 57.1644 | 52.7143 | -0.116921  | 0.171938  | 0.86349 | 0.999883  |
| gene2405 | gene2405 | fmhA      | gi 57650036 ref NC_002951.2 :2468540-2469791 | MVR | MR150 | OK     | 11.3321 | 10.7831 | -0.0716488 | 0.105072  | 0.91632 | 0.999883  |
| gene2406 | gene2406 | SACOL2410 | gi 57650036 ref NC_002951.2 :2469887-2472095 | MVR | MR150 | OK     | 354.715 | 354.249 | -0.0018972 | 0.001434  | 0.99886 | 0.999883  |
| gene2407 | gene2407 | SACOL2411 | gi 57650036 ref NC_002951.2 :2469887-2472095 | MVR | MR150 | OK     | 181.536 | 217.342 | 0.25971    | -0.146506 | 0.88352 | 0.999883  |
| gene2408 | gene2408 | SACOL2412 | gi 57650036 ref NC_002951.2 :2469887-2472095 | MVR | MR150 | OK     | 125.142 | 138.586 | 0.147214   | -0.07091  | 0.94347 | 0.999883  |
| gene2409 | gene2409 | SACOL2413 | gi 57650036 ref NC_002951.2 :2472215-2473613 | MVR | MR150 | OK     | 21.9692 | 20.8384 | -0.0762379 | 0.107281  | 0.91457 | 0.999883  |
| gene241  | gene241  | SACOL0250 | gi 57650036 ref NC_002951.2 :290131-290923   | MVR | MR150 | OK     | 1.95587 | 0.25863 | -2.91888   | 2.23559   | 0.02538 | 0.303073  |
| gene2410 | gene2410 | SACOL2414 | gi 57650036 ref NC_002951.2 :2473829-2473934 | MVR | MR150 | NOTEST | 0       | 0       | 0          | 0         | 1       | 1         |
| gene2411 | gene2411 | gpmA      | gi 57650036 ref NC_002951.2 :2474087-2474774 | MVR | MR150 | OK     | 141.55  | 118.507 | -0.256337  | 0.329344  | 0.7419  | 0.999883  |
| gene2412 | gene2412 | SACOL2416 | gi 57650036 ref NC_002951.2 :2475099-2475966 | MVR | MR150 | OK     | 10.7308 | 16.2988 | 0.603016   | -0.884826 | 0.37625 | 0.999883  |
| gene2413 | gene2413 | SACOL2418 | gi 57650036 ref NC_002951.2 :2476717-2478028 | MVR | MR150 | OK     | 16.0333 | 17.0935 | 0.0923766  | -0.133202 | 0.89403 | 0.999883  |
| gene2414 | gene2414 | hlgA      | gi 57650036 ref NC_002951.2 :2478563-2479493 | MVR | MR150 | OK     | 30.8116 | 21.1858 | -0.54038   | 0.777631  | 0.43679 | 0.999883  |
| gene2415 | gene2415 | SACOL2420 | gi 57650036 ref NC_002951.2 :2479556-2479682 | MVR | MR150 | NOTEST | 0       | 0       | 0          | 0         | 1       | 1         |
| gene2416 | gene2416 | hlgC      | gi 57650036 ref NC_002951.2 :2480060-2481008 | MVR | MR150 | OK     | 15.4268 | 10.031  | -0.620967  | 0.911655  | 0.36195 | 0.999883  |
| gene2417 | gene2417 | hlgB      | gi 57650036 ref NC_002951.2 :2481009-2481987 | MVR | MR150 | OK     | 13.805  | 9.44759 | -0.54717   | 0.803642  | 0.4216  | 0.999883  |
| gene2418 | gene2418 | SACOL2423 | gi 57650036 ref NC_002951.2 :2482038-2482506 | MVR | MR150 | OK     | 1.67042 | 4.56344 | 1.44991    | -1.53863  | 0.1239  | 0.697764  |
| gene2419 | gene2419 | bioW      | gi 57650036 ref NC_002951.2 :2482516-2483209 | MVR | MR150 | OK     | 3.11643 | 1.86312 | -0.74217   | 0.90013   | 0.36805 | 0.999883  |
| gene242  | gene242  | bglA      | gi 57650036 ref NC_002951.2 :290938-292375   | MVR | MR150 | OK     | 4.62868 | 4.45729 | -0.0544356 | 0.079311  | 0.93679 | 0.999883  |
| gene2420 | gene2420 | SACOL2425 | gi 57650036 ref NC_002951.2 :2483219-2485320 | MVR | MR150 | OK     | 2.16352 | 1.33748 | -0.693867  | 0.692232  | 0.48879 | 0.999883  |
| gene2421 | gene2421 | bioB      | gi 57650036 ref NC_002951.2 :2483219-2485320 | MVR | MR150 | OK     | 2.75981 | 1.13712 | -1.27918   | 1.21466   | 0.2245  | 0.89446   |
| gene2422 | gene2422 | bioA      | gi 57650036 ref NC_002951.2 :2485321-2487344 | MVR | MR150 | OK     | 1.75196 | 0.66072 | -1.40686   | 1.57037   | 0.11633 | 0.67404   |
| gene2423 | gene2423 | bioD      | gi 57650036 ref NC_002951.2 :2485321-2487344 | MVR | MR150 | OK     | 1.13644 | 0.31434 | -1.85411   | 0.931696  | 0.35149 | 0.999883  |
| gene2424 | gene2424 | SACOL2429 | gi 57650036 ref NC_002951.2 :2487564-2487708 | MVR | MR150 | NOTEST | 0       | 0       | 0          | 0         | 1       | 1         |
| gene2425 | gene2425 | SACOL2430 | gi 57650036 ref NC_002951.2 :2487795-2489529 | MVR | MR150 | OK     | 2.01415 | 0.29954 | -2.74934   | 3.11605   | 0.00183 | 0.0540416 |
| gene2426 | gene2426 | SACOL2431 | gi 57650036 ref NC_002951.2 :2489553-2491317 | MVR | MR150 | OK     | 1.25332 | 0.5876  | -1.09285   | 1.35088   | 0.17673 | 0.821477  |
| gene2427 | gene2427 | SACOL2433 | gi 57650036 ref NC_002951.2 :2491944-2492052 | MVR | MR150 | OK     | 6177.46 | 17905.4 | 1.53531    | -1.78328  | 0.07454 | 0.53808   |
| gene2428 | gene2428 | SACOL2434 | gi 57650036 ref NC_002951.2 :2492186-2492573 | MVR | MR150 | OK     | 4.89731 | 6.49166 | 0.406599   | -0.479232 | 0.63177 | 0.999883  |
| gene2429 | gene2429 | SACOL2435 | gi 57650036 ref NC_002951.2 :2492840-2493983 | MVR | MR150 | OK     | 31.0542 | 33.6167 | 0.114392   | -0.158312 | 0.87421 | 0.999883  |
| gene243  | gene243  | SACOL0252 | gi 57650036 ref NC_002951.2 :292808-293570   | MVR | MR150 | OK     | 3.36902 | 1.90695 | -0.821057  | 1.02951   | 0.30324 | 0.988092  |
| gene2430 | gene2430 | SACOL2436 | gi 57650036 ref NC_002951.2 :2494042-2494702 | MVR | MR150 | OK     | 54.4383 | 59.2346 | 0.121819   | -0.171342 | 0.86396 | 0.999883  |
| gene2431 | gene2431 | bcr       | gi 57650036 ref NC_002951.2 :2494883-2496095 | MVR | MR150 | OK     | 69.4329 | 64.921  | -0.0969357 | 0.123331  | 0.90185 | 0.999883  |
| gene2432 | gene2432 | SACOL2438 | gi 57650036 ref NC_002951.2 :2496217-2496691 | MVR | MR150 | OK     | 7.22337 | 6.69625 | -0.109318  | 0.143939  | 0.88555 | 0.999883  |

|          |          |           |                                              |     |       |        |         |         |            |           |         |          |
|----------|----------|-----------|----------------------------------------------|-----|-------|--------|---------|---------|------------|-----------|---------|----------|
| gene2433 | gene2433 | SACOL2439 | gi 57650036 ref NC_002951.2 :2496803-2497460 | MVR | MR150 | OK     | 45.7693 | 50.2442 | 0.134579   | -0.192063 | 0.84769 | 0.999883 |
| gene2434 | gene2434 | SACOL2440 | gi 57650036 ref NC_002951.2 :2497522-2498329 | MVR | MR150 | OK     | 5.11496 | 5.04477 | -0.0199349 | 0.027882  | 0.97776 | 0.999883 |
| gene2435 | gene2435 | SACOL2441 | gi 57650036 ref NC_002951.2 :2498614-2500024 | MVR | MR150 | OK     | 90.637  | 101.387 | 0.1617     | -0.192905 | 0.84703 | 0.999883 |
| gene2436 | gene2436 | SACOL2442 | gi 57650036 ref NC_002951.2 :2500161-2502240 | MVR | MR150 | OK     | 30.3958 | 34.2378 | 0.171716   | -0.221144 | 0.82498 | 0.999883 |
| gene2437 | gene2437 | SACOL2443 | gi 57650036 ref NC_002951.2 :2502379-2504209 | MVR | MR150 | OK     | 28.2245 | 40.1245 | 0.507534   | -0.660029 | 0.50924 | 0.999883 |
| gene2438 | gene2438 | SACOL2445 | gi 57650036 ref NC_002951.2 :2504440-2505937 | MVR | MR150 | OK     | 25.5445 | 29.758  | 0.220266   | -0.299665 | 0.76443 | 0.999883 |
| gene2439 | gene2439 | SACOL2446 | gi 57650036 ref NC_002951.2 :2506028-2506880 | MVR | MR150 | OK     | 20.7635 | 21.1356 | 0.0256221  | -0.037421 | 0.97015 | 0.999883 |
| gene244  | gene244  | rbsK      | gi 57650036 ref NC_002951.2 :293820-294735   | MVR | MR150 | OK     | 12.4398 | 9.63712 | -0.368284  | 0.540858  | 0.58861 | 0.999883 |
| gene2440 | gene2440 | SACOL2448 | gi 57650036 ref NC_002951.2 :2507201-2508137 | MVR | MR150 | OK     | 11.9087 | 13.1072 | 0.13834    | -0.203402 | 0.83882 | 0.999883 |
| gene2441 | gene2441 | SACOL2449 | gi 57650036 ref NC_002951.2 :2508362-2509763 | MVR | MR150 | OK     | 40.0997 | 36.5993 | -0.131775  | 0.174679  | 0.86133 | 0.999883 |
| gene2442 | gene2442 | SACOL2450 | gi 57650036 ref NC_002951.2 :2510056-2511693 | MVR | MR150 | OK     | 27.3743 | 39.1978 | 0.517952   | -0.465319 | 0.6417  | 0.999883 |
| gene2443 | gene2443 | SACOL2451 | gi 57650036 ref NC_002951.2 :2510056-2511693 | MVR | MR150 | OK     | 25.1659 | 30.749  | 0.289069   | -0.293551 | 0.7691  | 0.999883 |
| gene2444 | gene2444 | SACOL2452 | gi 57650036 ref NC_002951.2 :2511709-2513568 | MVR | MR150 | OK     | 14.0467 | 26.6822 | 0.92564    | -0.642963 | 0.52025 | 0.999883 |
| gene2445 | gene2445 | SACOL2453 | gi 57650036 ref NC_002951.2 :2511709-2513568 | MVR | MR150 | OK     | 20.466  | 26.3945 | 0.36701    | -0.432703 | 0.66523 | 0.999883 |
| gene2446 | gene2446 | SACOL2454 | gi 57650036 ref NC_002951.2 :2513894-2514014 | MVR | MR150 | NOTEST | 0       | 0       | 0          | 0         | 1       | 1        |
| gene2447 | gene2447 | SACOL2456 | gi 57650036 ref NC_002951.2 :2514237-2515000 | MVR | MR150 | OK     | 38.3954 | 35.9688 | -0.0941862 | 0.137194  | 0.89088 | 0.999883 |
| gene2448 | gene2448 | SACOL2457 | gi 57650036 ref NC_002951.2 :2514237-2515000 | MVR | MR150 | NOTEST | 0       | 0       | 0          | 0         | 1       | 1        |
| gene2449 | gene2449 | SACOL2458 | gi 57650036 ref NC_002951.2 :2515016-2516654 | MVR | MR150 | OK     | 30.8567 | 35.2554 | 0.192257   | -0.254049 | 0.79946 | 0.999883 |
| gene245  | gene245  | SACOL0254 | gi 57650036 ref NC_002951.2 :294762-295167   | MVR | MR150 | OK     | 5.72047 | 8.16859 | 0.513953   | -0.639876 | 0.52225 | 0.999883 |
| gene2450 | gene2450 | pnbA      | gi 57650036 ref NC_002951.2 :2517261-2518614 | MVR | MR150 | OK     | 14.2455 | 13.5487 | -0.0723495 | 0.10501   | 0.91637 | 0.999883 |
| gene2451 | gene2451 | SACOL2460 | gi 57650036 ref NC_002951.2 :2518675-2519863 | MVR | MR150 | OK     | 8.61455 | 9.30033 | 0.110507   | -0.162493 | 0.87092 | 0.999883 |
| gene2452 | gene2452 | SACOL2461 | gi 57650036 ref NC_002951.2 :2520258-2521690 | MVR | MR150 | OK     | 7.82413 | 8.49102 | 0.118008   | -0.141598 | 0.8874  | 0.999883 |
| gene2453 | gene2453 | SACOL2462 | gi 57650036 ref NC_002951.2 :2520258-2521690 | MVR | MR150 | OK     | 5.06042 | 4.95937 | -0.0291023 | 0.024421  | 0.98052 | 0.999883 |
| gene2454 | gene2454 | pepA2     | gi 57650036 ref NC_002951.2 :2521937-2523014 | MVR | MR150 | OK     | 61.7019 | 69.4971 | 0.171637   | -0.222512 | 0.82392 | 0.999883 |
| gene2455 | gene2455 | SACOL2464 | gi 57650036 ref NC_002951.2 :2523368-2523892 | MVR | MR150 | OK     | 46.6965 | 60.7501 | 0.379572   | -0.364653 | 0.71537 | 0.999883 |
| gene2456 | gene2456 | SACOL2465 | gi 57650036 ref NC_002951.2 :2523368-2523892 | MVR | MR150 | OK     | 60.7722 | 98.0247 | 0.689734   | -0.760844 | 0.44675 | 0.999883 |
| gene2457 | gene2457 | SACOL2466 | gi 57650036 ref NC_002951.2 :2523997-2524192 | MVR | MR150 | NOTEST | 0       | 0       | 0          | 0         | 1       | 1        |
| gene2458 | gene2458 | SACOL2467 | gi 57650036 ref NC_002951.2 :2524250-2524706 | MVR | MR150 | OK     | 36.6017 | 18.5056 | -0.983947  | 1.43481   | 0.15134 | 0.757479 |
| gene2459 | gene2459 | SACOL2469 | gi 57650036 ref NC_002951.2 :2524873-2526451 | MVR | MR150 | OK     | 15.5072 | 19.7844 | 0.351424   | -0.496654 | 0.61943 | 0.999883 |
| gene246  | gene246  | SACOL0255 | gi 57650036 ref NC_002951.2 :295181-296063   | MVR | MR150 | OK     | 7.28705 | 7.40899 | 0.0239423  | -0.03469  | 0.97233 | 0.999883 |
| gene2460 | gene2460 | SACOL2470 | gi 57650036 ref NC_002951.2 :2526645-2527395 | MVR | MR150 | OK     | 14.0057 | 15.5882 | 0.15445    | -0.226971 | 0.82045 | 0.999883 |
| gene2461 | gene2461 | SACOL2471 | gi 57650036 ref NC_002951.2 :2527618-2528812 | MVR | MR150 | OK     | 4.34093 | 4.1599  | -0.0614568 | 0.0882    | 0.92972 | 0.999883 |
| gene2462 | gene2462 | SACOL2472 | gi 57650036 ref NC_002951.2 :2528823-2532179 | MVR | MR150 | OK     | 2.66774 | 0.83509 | -1.67563   | 0.996303  | 0.3191  | 0.999883 |

|          |          |           |                                              |     |       |        |         |         |            |           |         |          |
|----------|----------|-----------|----------------------------------------------|-----|-------|--------|---------|---------|------------|-----------|---------|----------|
| gene2463 | gene2463 | SACOL2473 | gi 57650036 ref NC_002951.2 :2528823-2532179 | MVR | MR150 | OK     | 1.58031 | 0.74567 | -1.0836    | 0.594955  | 0.55187 | 0.999883 |
| gene2464 | gene2464 | SACOL2474 | gi 57650036 ref NC_002951.2 :2528823-2532179 | MVR | MR150 | OK     | 2.26291 | 0.91414 | -1.3077    | 0.861478  | 0.38898 | 0.999883 |
| gene2465 | gene2465 | SACOL2475 | gi 57650036 ref NC_002951.2 :2528823-2532179 | MVR | MR150 | OK     | 2.54601 | 2.49661 | -0.0282649 | 0.025837  | 0.97939 | 0.999883 |
| gene2466 | gene2466 | SACOL2476 | gi 57650036 ref NC_002951.2 :2532191-2533790 | MVR | MR150 | OK     | 4.59388 | 4.05076 | -0.181518  | 0.265143  | 0.7909  | 0.999883 |
| gene2467 | gene2467 | SACOL2477 | gi 57650036 ref NC_002951.2 :2533932-2535147 | MVR | MR150 | NOTEST | 0.41309 | 0.45265 | 0.131929   | -0.126842 | 0.89907 | 1        |
| gene2468 | gene2468 | SACOL2478 | gi 57650036 ref NC_002951.2 :2535226-2536045 | MVR | MR150 | OK     | 0.98272 | 1.23676 | 0.331717   | -0.357208 | 0.72094 | 0.999883 |
| gene2469 | gene2469 | SACOL2479 | gi 57650036 ref NC_002951.2 :2536055-2536877 | MVR | MR150 | OK     | 1.07557 | 0.24616 | -2.12743   | 1.58536   | 0.11288 | 0.666893 |
| gene247  | gene247  | SACOL0257 | gi 57650036 ref NC_002951.2 :296294-297293   | MVR | MR150 | OK     | 6.03642 | 5.36632 | -0.169762  | 0.244685  | 0.8067  | 0.999883 |
| gene2470 | gene2470 | SACOL2480 | gi 57650036 ref NC_002951.2 :2537024-2537156 | MVR | MR150 | NOTEST | 0       | 0       | 0          | 0         | 1       | 1        |
| gene2471 | gene2471 | SACOL2481 | gi 57650036 ref NC_002951.2 :2537619-2537985 | MVR | MR150 | OK     | 6.71501 | 7.26709 | 0.113989   | -0.137473 | 0.89066 | 0.999883 |
| gene2472 | gene2472 | fabG2     | gi 57650036 ref NC_002951.2 :2538247-2539066 | MVR | MR150 | OK     | 11.1047 | 8.6573  | -0.359179  | 0.524375  | 0.60002 | 0.999883 |
| gene2473 | gene2473 | SACOL2483 | gi 57650036 ref NC_002951.2 :2539298-2540837 | MVR | MR150 | OK     | 40.7848 | 39.0051 | -0.0643671 | 0.084062  | 0.93301 | 0.999883 |
| gene2474 | gene2474 | SACOL2484 | gi 57650036 ref NC_002951.2 :2540948-2541371 | MVR | MR150 | OK     | 22.0925 | 22.5729 | 0.0310348  | -0.04487  | 0.96421 | 0.999883 |
| gene2475 | gene2475 | SACOL2485 | gi 57650036 ref NC_002951.2 :2541822-2542242 | MVR | MR150 | OK     | 83.4607 | 94.2711 | 0.175719   | -0.252918 | 0.80033 | 0.999883 |
| gene2476 | gene2476 | SACOL2486 | gi 57650036 ref NC_002951.2 :2542259-2542679 | MVR | MR150 | OK     | 26.8372 | 28.42   | 0.0826715  | -0.120591 | 0.90402 | 0.999883 |
| gene2477 | gene2477 | SACOL2487 | gi 57650036 ref NC_002951.2 :2542945-2543368 | MVR | MR150 | OK     | 1.16277 | 1.36806 | 0.234568   | -0.187001 | 0.85166 | 0.999883 |
| gene2478 | gene2478 | SACOL2488 | gi 57650036 ref NC_002951.2 :2543618-2544314 | MVR | MR150 | OK     | 72.709  | 59.5683 | -0.287589  | 0.395638  | 0.69237 | 0.999883 |
| gene2479 | gene2479 | SACOL2489 | gi 57650036 ref NC_002951.2 :2544761-2544884 | MVR | MR150 | NOTEST | 0       | 0       | 0          | 0         | 1       | 1        |
| gene248  | gene248  | SACOL0258 | gi 57650036 ref NC_002951.2 :297443-297623   | MVR | MR150 | NOTEST | 0       | 0       | 0          | 0         | 1       | 1        |
| gene2480 | gene2480 | SACOL2491 | gi 57650036 ref NC_002951.2 :2545143-2545335 | MVR | MR150 | OK     | 96.5754 | 48.0378 | -1.00749   | 1.29351   | 0.19584 | 0.858688 |
| gene2481 | gene2481 | SACOL2492 | gi 57650036 ref NC_002951.2 :2545769-2545892 | MVR | MR150 | NOTEST | 0       | 0       | 0          | 0         | 1       | 1        |
| gene2482 | gene2482 | SACOL2493 | gi 57650036 ref NC_002951.2 :2545895-2546690 | MVR | MR150 | OK     | 5.8368  | 4.6318  | -0.333605  | 0.466494  | 0.64086 | 0.999883 |
| gene2483 | gene2483 | SACOL2494 | gi 57650036 ref NC_002951.2 :2547225-2547513 | MVR | MR150 | NOTEST | 0       | 0       | 0          | 0         | 1       | 1        |
| gene2484 | gene2484 | SACOL2495 | gi 57650036 ref NC_002951.2 :2547515-2547842 | MVR | MR150 | NOTEST | 0       | 0       | 0          | 0         | 1       | 1        |
| gene2485 | gene2485 | SACOL2496 | gi 57650036 ref NC_002951.2 :2548053-2549948 | MVR | MR150 | NOTEST | 0       | 0       | 0          | 0         | 1       | 1        |
| gene2486 | gene2486 | SACOL2497 | gi 57650036 ref NC_002951.2 :2548053-2549948 | MVR | MR150 | NOTEST | 0       | 0       | 0          | 0         | 1       | 1        |
| gene2487 | gene2487 | SACOL2498 | gi 57650036 ref NC_002951.2 :2550059-2550836 | MVR | MR150 | OK     | 6.0267  | 5.57224 | -0.113111  | 0.159356  | 0.87339 | 0.999883 |
| gene2488 | gene2488 | SACOL2499 | gi 57650036 ref NC_002951.2 :2551138-2554000 | MVR | MR150 | OK     | 11.7739 | 10.4155 | -0.176861  | 0.245379  | 0.80616 | 0.999883 |
| gene2489 | gene2489 | SACOL2500 | gi 57650036 ref NC_002951.2 :2554001-2554394 | MVR | MR150 | OK     | 16.5879 | 11.8083 | -0.490326  | 0.673841  | 0.50041 | 0.999883 |
| gene249  | gene249  | SACOL0259 | gi 57650036 ref NC_002951.2 :297672-298065   | MVR | MR150 | OK     | 4.73939 | 5.51055 | 0.217494   | -0.253248 | 0.80008 | 0.999883 |
| gene2490 | gene2490 | SACOL2501 | gi 57650036 ref NC_002951.2 :2554510-2556319 | MVR | MR150 | OK     | 24.9083 | 31.8902 | 0.356485   | -0.473158 | 0.6361  | 0.999883 |
| gene2491 | gene2491 | SACOL2502 | gi 57650036 ref NC_002951.2 :2556602-2556869 | MVR | MR150 | OK     | 24.6218 | 30.3751 | 0.302951   | -0.404152 | 0.6861  | 0.999883 |
| gene2492 | gene2492 | SACOL2503 | gi 57650036 ref NC_002951.2 :2557012-2557321 | MVR | MR150 | OK     | 3.50209 | 5.27132 | 0.58995    | -0.572787 | 0.56679 | 0.999883 |

|          |          |           |                                              |     |       |        |         |         |             |             |         |          |
|----------|----------|-----------|----------------------------------------------|-----|-------|--------|---------|---------|-------------|-------------|---------|----------|
| gene2493 | gene2493 | SACOL2504 | gi 57650036 ref NC_002951.2 :2557642-2558836 | MVR | MR150 | OK     | 4.64239 | 3.69769 | -0.328243   | 0.470052    | 0.63832 | 0.999883 |
| gene2494 | gene2494 | SACOL2505 | gi 57650036 ref NC_002951.2 :2559219-2562951 | MVR | MR150 | OK     | 8.90415 | 7.85022 | -0.181746   | 0.252082    | 0.80098 | 0.999883 |
| gene2495 | gene2495 | sarT      | gi 57650036 ref NC_002951.2 :2563255-2563612 | MVR | MR150 | OK     | 3.3404  | 2.87028 | -0.218832   | 0.214478    | 0.83017 | 0.999883 |
| gene2496 | gene2496 | sarU      | gi 57650036 ref NC_002951.2 :2563935-2564679 | MVR | MR150 | NOTEST | 0.22488 | 0       | -1.79769e+3 | -1.79769e+3 | 0.14006 | 1        |
| gene2497 | gene2497 | galU      | gi 57650036 ref NC_002951.2 :2564889-2565756 | MVR | MR150 | OK     | 41.8318 | 44.994  | 0.105132    | -0.14633    | 0.88366 | 0.999883 |
| gene2498 | gene2498 | fnbB      | gi 57650036 ref NC_002951.2 :2565935-2568758 | MVR | MR150 | OK     | 8.48466 | 10.5119 | 0.309098    | -0.435812   | 0.66297 | 0.999883 |
| gene2499 | gene2499 | SACOL2510 | gi 57650036 ref NC_002951.2 :2568918-2569041 | MVR | MR150 | NOTEST | 0       | 0       | 0           | 0           | 1       | 1        |
| gene25   | gene25   | SACOL0024 | gi 57650036 ref NC_002951.2 :31025-33344     | MVR | MR150 | OK     | 8.4037  | 7.01187 | -0.261226   | 0.378734    | 0.70489 | 0.999883 |
| gene250  | gene250  | SACOL0260 | gi 57650036 ref NC_002951.2 :298292-298697   | MVR | MR150 | NOTEST | 0       | 0       | 0           | 0           | 1       | 1        |
| gene2500 | gene2500 | fnbA      | gi 57650036 ref NC_002951.2 :2569439-2572496 | MVR | MR150 | OK     | 27.5224 | 41.017  | 0.575616    | -0.701692   | 0.48287 | 0.999883 |
| gene2501 | gene2501 | SACOL2513 | gi 57650036 ref NC_002951.2 :2572737-2572932 | MVR | MR150 | NOTEST | 0       | 0       | 0           | 0           | 1       | 1        |
| gene2502 | gene2502 | gntP      | gi 57650036 ref NC_002951.2 :2572963-2574322 | MVR | MR150 | OK     | 10.8209 | 12.5536 | 0.214282    | -0.312914   | 0.75435 | 0.999883 |
| gene2503 | gene2503 | gntK      | gi 57650036 ref NC_002951.2 :2574438-2575992 | MVR | MR150 | OK     | 5.7607  | 7.46577 | 0.374047    | -0.549627   | 0.58258 | 0.999883 |
| gene2504 | gene2504 | gntR      | gi 57650036 ref NC_002951.2 :2576015-2576696 | MVR | MR150 | OK     | 7.41983 | 7.95654 | 0.100754    | -0.143057   | 0.88625 | 0.999883 |
| gene2505 | gene2505 | SACOL2517 | gi 57650036 ref NC_002951.2 :2576849-2577614 | MVR | MR150 | OK     | 52.957  | 60.4277 | 0.190389    | -0.262392   | 0.79302 | 0.999883 |
| gene2506 | gene2506 | SACOL2518 | gi 57650036 ref NC_002951.2 :2577778-2578471 | MVR | MR150 | OK     | 18.9479 | 22.047  | 0.218543    | -0.321105   | 0.74813 | 0.999883 |
| gene2507 | gene2507 | SACOL2519 | gi 57650036 ref NC_002951.2 :2578701-2579190 | MVR | MR150 | OK     | 132.678 | 86.7909 | -0.612318   | 0.847619    | 0.39665 | 0.999883 |
| gene2508 | gene2508 | SACOL2520 | gi 57650036 ref NC_002951.2 :2579256-2581149 | MVR | MR150 | OK     | 15.3844 | 10.6758 | -0.527135   | 0.750528    | 0.45294 | 0.999883 |
| gene2509 | gene2509 | SACOL2521 | gi 57650036 ref NC_002951.2 :2581557-2582835 | MVR | MR150 | OK     | 259.402 | 255.44  | -0.0222036  | 0.024155    | 0.98073 | 0.999883 |
| gene251  | gene251  | SACOL0261 | gi 57650036 ref NC_002951.2 :298737-300114   | MVR | MR150 | OK     | 2.73909 | 2.47234 | -0.147819   | 0.206788    | 0.83618 | 0.999883 |
| gene2510 | gene2510 | SACOL2522 | gi 57650036 ref NC_002951.2 :2583381-2583993 | MVR | MR150 | OK     | 57.9998 | 46.4391 | -0.320706   | 0.458559    | 0.64655 | 0.999883 |
| gene2511 | gene2511 | SACOL2523 | gi 57650036 ref NC_002951.2 :2584089-2585710 | MVR | MR150 | OK     | 3.35957 | 3.17726 | -0.080494   | 0.109513    | 0.9128  | 0.999883 |
| gene2512 | gene2512 | SACOL2524 | gi 57650036 ref NC_002951.2 :2584089-2585710 | MVR | MR150 | OK     | 1.20771 | 0.57684 | -1.06602    | 0.364917    | 0.71517 | 0.999883 |
| gene2513 | gene2513 | SACOL2525 | gi 57650036 ref NC_002951.2 :2586137-2586833 | MVR | MR150 | OK     | 5.07848 | 6.17288 | 0.281546    | -0.389159   | 0.69716 | 0.999883 |
| gene2514 | gene2514 | SACOL2526 | gi 57650036 ref NC_002951.2 :2586834-2587605 | MVR | MR150 | OK     | 6.41344 | 8.04393 | 0.326801    | -0.467382   | 0.64023 | 0.999883 |
| gene2515 | gene2515 | SACOL2527 | gi 57650036 ref NC_002951.2 :2587977-2589942 | MVR | MR150 | OK     | 80.9309 | 103.358 | 0.352888    | -0.405398   | 0.68519 | 0.999883 |
| gene2516 | gene2516 | SACOL2528 | gi 57650036 ref NC_002951.2 :2590285-2591365 | MVR | MR150 | OK     | 34.9103 | 36.5444 | 0.0659984   | -0.09106    | 0.92745 | 0.999883 |
| gene2517 | gene2517 | SACOL2529 | gi 57650036 ref NC_002951.2 :2591469-2592063 | MVR | MR150 | OK     | 24.7999 | 17.0926 | -0.536969   | 0.788377    | 0.43048 | 0.999883 |
| gene2518 | gene2518 | SACOL2530 | gi 57650036 ref NC_002951.2 :2592084-2593053 | MVR | MR150 | OK     | 4.00312 | 1.99127 | -1.00744    | 1.3454      | 0.1785  | 0.821737 |
| gene2519 | gene2519 | SACOL2531 | gi 57650036 ref NC_002951.2 :2593130-2593565 | MVR | MR150 | OK     | 29.1341 | 18.8403 | -0.628885   | 0.91285     | 0.36132 | 0.999883 |
| gene252  | gene252  | SACOL0262 | gi 57650036 ref NC_002951.2 :300347-301340   | MVR | MR150 | OK     | 3.80219 | 5.4069  | 0.507971    | -0.718997   | 0.47214 | 0.999883 |
| gene2520 | gene2520 | SACOL2532 | gi 57650036 ref NC_002951.2 :2593791-2594076 | MVR | MR150 | OK     | 67.0867 | 62.521  | -0.101688   | 0.148315    | 0.88209 | 0.999883 |
| gene2521 | gene2521 | SACOL2533 | gi 57650036 ref NC_002951.2 :2594246-2595053 | MVR | MR150 | OK     | 100.394 | 142.515 | 0.505443    | -0.638019   | 0.52346 | 0.999883 |

|          |          |             |                                              |     |       |        |         |         |                               |           |         |          |
|----------|----------|-------------|----------------------------------------------|-----|-------|--------|---------|---------|-------------------------------|-----------|---------|----------|
| gene2522 | gene2522 | frp         | gi 57650036 ref NC_002951.2 :2595172-2595844 | MVR | MR150 | OK     | 121.492 | 193.622 | 0.672385                      | -0.84888  | 0.39595 | 0.999883 |
| gene2523 | gene2523 | SACOL2535   | gi 57650036 ref NC_002951.2 :2596113-2597106 | MVR | MR150 | OK     | 1169.78 | 1256.14 | 0.102756                      | -0.104931 | 0.91643 | 0.999883 |
| gene2524 | gene2524 | SACOL2536   | gi 57650036 ref NC_002951.2 :2597354-2598155 | MVR | MR150 | OK     | 9.22155 | 9.68069 | 0.0701003                     | -0.102126 | 0.91866 | 0.999883 |
| gene2525 | gene2525 | SACOL2537   | gi 57650036 ref NC_002951.2 :2598475-2599111 | MVR | MR150 | OK     | 3.40527 | 4.91514 | 0.529462                      | -0.689543 | 0.49048 | 0.999883 |
| gene2526 | gene2526 | SACOL2538   | gi 57650036 ref NC_002951.2 :2599116-2599848 | MVR | MR150 | OK     | 9.32249 | 6.90656 | -0.432749                     | 0.620574  | 0.53488 | 0.999883 |
| gene2527 | gene2527 | srtA        | gi 57650036 ref NC_002951.2 :2600007-2600628 | MVR | MR150 | OK     | 131.926 | 133.07  | 0.0124489                     | -0.016217 | 0.98706 | 0.999883 |
| gene2528 | gene2528 | SACOL2541   | gi 57650036 ref NC_002951.2 :2600821-2601313 | MVR | MR150 | OK     | 16.1025 | 10.9998 | -0.549807                     | 0.781979  | 0.43423 | 0.999883 |
| gene2529 | gene2529 | SACOL2542   | gi 57650036 ref NC_002951.2 :2601750-2601921 | MVR | MR150 | OK     | 4.71154 | 10.8213 | 1.19961                       | -0.540211 | 0.58905 | 0.999883 |
| gene253  | gene253  | lytM        | gi 57650036 ref NC_002951.2 :301647-302616   | MVR | MR150 | OK     | 108.32  | 127.84  | 0.239038                      | -0.294003 | 0.76876 | 0.999883 |
| gene2530 | gene2530 | SACOL2543   | gi 57650036 ref NC_002951.2 :2601982-2602081 | MVR | MR150 | NOTEST | 0       | 0       | 0                             | 0         | 1       | 1        |
| gene2531 | gene2531 | sdaAA       | gi 57650036 ref NC_002951.2 :2602099-2602999 | MVR | MR150 | OK     | 7.69861 | 7.87482 | 0.0326488                     | -0.047492 | 0.96212 | 0.999883 |
| gene2532 | gene2532 | sdaAB       | gi 57650036 ref NC_002951.2 :2603012-2603693 | MVR | MR150 | OK     | 2.43063 | 1.90957 | -0.348086                     | 0.412317  | 0.68011 | 0.999883 |
| gene2533 | gene2533 | SACOL2546   | gi 57650036 ref NC_002951.2 :2603695-2604739 | MVR | MR150 | OK     | 3.92237 | 1.63296 | -1.26423                      | 1.67704   | 0.09354 | 0.61426  |
| gene2534 | gene2534 | SACOL2547   | gi 57650036 ref NC_002951.2 :2605290-2605494 | MVR | MR150 | OK     | 31.0752 | 45.9906 | 0.565575                      | -0.684488 | 0.49367 | 0.999883 |
| gene2535 | gene2535 | SACOL2548   | gi 57650036 ref NC_002951.2 :2605649-2606612 | MVR | MR150 | OK     | 19.2285 | 26.4914 | 0.462276                      | -0.668096 | 0.50407 | 0.999883 |
| gene2536 | gene2536 | SACOL2549   | gi 57650036 ref NC_002951.2 :2606693-2607662 | MVR | MR150 | OK     | 45.9182 | 60.3355 | 0.393943                      | -0.529405 | 0.59653 | 0.999883 |
| gene2537 | gene2537 | SACOL2550   | gi 57650036 ref NC_002951.2 :2607794-2608139 | MVR | MR150 | OK     | 25.263  | 17.4928 | -0.530264                     | 0.738635  | 0.46013 | 0.999883 |
| gene2538 | gene2538 | SACOL2551   | gi 57650036 ref NC_002951.2 :2608180-2608591 | MVR | MR150 | OK     | 20.346  | 29.6037 | 0.541032                      | -0.781785 | 0.43434 | 0.999883 |
| gene2539 | gene2539 | SACOL2552   | gi 57650036 ref NC_002951.2 :2608970-2611037 | MVR | MR150 | OK     | 3.45925 | 3.03557 | -0.188492                     | 0.275366  | 0.78304 | 0.999883 |
| gene254  | gene254  | SACOL0264   | gi 57650036 ref NC_002951.2 :302667-303327   | MVR | MR150 | OK     | 11.9335 | 10.9817 | -0.119918                     | 0.174097  | 0.86179 | 0.999883 |
| gene2540 | gene2540 | SACOL2553   | gi 57650036 ref NC_002951.2 :2611337-2613077 | MVR | MR150 | OK     | 30.4785 | 22.975  | -0.407731                     | 0.547116  | 0.5843  | 0.999883 |
| gene2541 | gene2541 | SACOL2554   | gi 57650036 ref NC_002951.2 :2613123-2614201 | MVR | MR150 | OK     | 15.0551 | 9.68503 | -0.636424                     | 0.92107   | 0.35701 | 0.999883 |
| gene2542 | gene2542 | SACOL2554.1 | gi 57650036 ref NC_002951.2 :2613123-2614201 | MVR | MR150 | NOTEST | 0.99938 | 0       | -1.79769e+3(-1.79769e+0.32002 | 1         |         |          |
| gene2543 | gene2543 | SACOL2555   | gi 57650036 ref NC_002951.2 :2614413-2615298 | MVR | MR150 | OK     | 20.3466 | 16.5414 | -0.298705                     | 0.437191  | 0.66197 | 0.999883 |
| gene2544 | gene2544 | SACOL2556   | gi 57650036 ref NC_002951.2 :2615458-2615677 | MVR | MR150 | OK     | 5831.75 | 4982.77 | -0.22698                      | 0.252679  | 0.80052 | 0.999883 |
| gene2545 | gene2545 | SACOL2557   | gi 57650036 ref NC_002951.2 :2616065-2616497 | MVR | MR150 | OK     | 218.469 | 159.222 | -0.456392                     | 0.611179  | 0.54108 | 0.999883 |
| gene2546 | gene2546 | SACOL2559   | gi 57650036 ref NC_002951.2 :2617256-2617514 | MVR | MR150 | OK     | 3.73983 | 4.17126 | 0.157513                      | -0.125571 | 0.90007 | 0.999883 |
| gene2547 | gene2547 | SACOL2560   | gi 57650036 ref NC_002951.2 :2618092-2619370 | MVR | MR150 | OK     | 42.6695 | 40.7738 | -0.0655631                    | 0.087117  | 0.93058 | 0.999883 |
| gene2548 | gene2548 | SACOL2561   | gi 57650036 ref NC_002951.2 :2619623-2620790 | MVR | MR150 | OK     | 101.955 | 102.149 | 0.00274083                    | -0.003335 | 0.99734 | 0.999883 |
| gene2549 | gene2549 | ogt         | gi 57650036 ref NC_002951.2 :2620959-2621481 | MVR | MR150 | OK     | 275.648 | 361.592 | 0.391532                      | -0.475968 | 0.6341  | 0.999883 |
| gene255  | gene255  | SACOL0265   | gi 57650036 ref NC_002951.2 :303340-305424   | MVR | MR150 | OK     | 6.45999 | 2.7609  | -1.22639                      | 1.02952   | 0.30323 | 0.988092 |
| gene2550 | gene2550 | SACOL2563   | gi 57650036 ref NC_002951.2 :2621889-2623995 | MVR | MR150 | OK     | 14.7313 | 10.6884 | -0.462836                     | 0.65424   | 0.51296 | 0.999883 |
| gene2551 | gene2551 | feoB        | gi 57650036 ref NC_002951.2 :2624246-2626241 | MVR | MR150 | OK     | 3.00539 | 1.02399 | -1.55335                      | 2.14534   | 0.03193 | 0.343304 |

|          |          |           |                                              |     |       |        |         |         |              |                   |          |          |
|----------|----------|-----------|----------------------------------------------|-----|-------|--------|---------|---------|--------------|-------------------|----------|----------|
| gene2552 | gene2552 | SACOL2565 | gi 57650036 ref NC_002951.2 :2626252-2626480 | MVR | MR150 | OK     | 2.74492 | 0       | -1.79769e+31 | -1.79769e+0.14006 | 0.736107 |          |
| gene2553 | gene2553 | SACOL2566 | gi 57650036 ref NC_002951.2 :2626695-2629185 | MVR | MR150 | OK     | 10.4541 | 7.29104 | -0.519875    | 0.744301          | 0.45669  | 0.999883 |
| gene2554 | gene2554 | SACOL2567 | gi 57650036 ref NC_002951.2 :2629392-2629878 | MVR | MR150 | OK     | 2.44765 | 2.13895 | -0.194492    | 0.206506          | 0.8364   | 0.999883 |
| gene2555 | gene2555 | SACOL2568 | gi 57650036 ref NC_002951.2 :2629954-2630122 | MVR | MR150 | OK     | 10.3885 | 24.007  | 1.20846      | -0.769615         | 0.44153  | 0.999883 |
| gene2556 | gene2556 | SACOL2569 | gi 57650036 ref NC_002951.2 :2630233-2631778 | MVR | MR150 | OK     | 269.144 | 264.302 | -0.0261867   | 0.027793          | 0.97783  | 0.999883 |
| gene2557 | gene2557 | SACOL2570 | gi 57650036 ref NC_002951.2 :2631967-2632567 | MVR | MR150 | OK     | 12.9021 | 14.9232 | 0.209955     | -0.305339         | 0.76011  | 0.999883 |
| gene2558 | gene2558 | SACOL2571 | gi 57650036 ref NC_002951.2 :2632805-2632997 | MVR | MR150 | OK     | 83.1622 | 180.142 | 1.11513      | -1.53335          | 0.12519  | 0.701233 |
| gene2559 | gene2559 | SACOL2572 | gi 57650036 ref NC_002951.2 :2633236-2635645 | MVR | MR150 | OK     | 25.2703 | 30.5801 | 0.275148     | -0.353729         | 0.72354  | 0.999883 |
| gene256  | gene256  | SACOL0266 | gi 57650036 ref NC_002951.2 :303340-305424   | MVR | MR150 | OK     | 6.3877  | 5.70134 | -0.163995    | 0.193087          | 0.84689  | 0.999883 |
| gene2560 | gene2560 | SACOL2573 | gi 57650036 ref NC_002951.2 :2635935-2636142 | MVR | MR150 | OK     | 130.903 | 186.331 | 0.509368     | -0.736913         | 0.46118  | 0.999883 |
| gene2561 | gene2561 | SACOL2574 | gi 57650036 ref NC_002951.2 :2636231-2637230 | MVR | MR150 | OK     | 45.7259 | 50.7883 | 0.151486     | -0.204625         | 0.83787  | 0.999883 |
| gene2562 | gene2562 | SACOL2575 | gi 57650036 ref NC_002951.2 :2637252-2638407 | MVR | MR150 | OK     | 18.0909 | 21.0071 | 0.215615     | -0.310621         | 0.75609  | 0.999883 |
| gene2563 | gene2563 | crtN      | gi 57650036 ref NC_002951.2 :2638833-2640342 | MVR | MR150 | OK     | 15.5659 | 12.6366 | -0.300788    | 0.433548          | 0.66462  | 0.999883 |
| gene2564 | gene2564 | crtM      | gi 57650036 ref NC_002951.2 :2640353-2641217 | MVR | MR150 | OK     | 10.9638 | 10.3769 | -0.0793692   | 0.116429          | 0.90731  | 0.999883 |
| gene2565 | gene2565 | SACOL2578 | gi 57650036 ref NC_002951.2 :2641253-2644361 | MVR | MR150 | OK     | 20.4331 | 12.7482 | -0.680611    | 0.5548            | 0.57903  | 0.999883 |
| gene2566 | gene2566 | SACOL2579 | gi 57650036 ref NC_002951.2 :2641253-2644361 | MVR | MR150 | OK     | 21.0918 | 14.5584 | -0.534826    | 0.534372          | 0.59308  | 0.999883 |
| gene2567 | gene2567 | SACOL2580 | gi 57650036 ref NC_002951.2 :2641253-2644361 | MVR | MR150 | OK     | 13.6419 | 8.99662 | -0.60059     | 0.221822          | 0.82445  | 0.999883 |
| gene2568 | gene2568 | SACOL2581 | gi 57650036 ref NC_002951.2 :2644535-2645303 | MVR | MR150 | OK     | 628.435 | 526.693 | -0.2548      | 0.273121          | 0.78476  | 0.999883 |
| gene2569 | gene2569 | SACOL2582 | gi 57650036 ref NC_002951.2 :2645663-2647475 | MVR | MR150 | OK     | 30.7543 | 33.0661 | 0.104564     | -0.137059         | 0.89098  | 0.999883 |
| gene257  | gene257  | SACOL0267 | gi 57650036 ref NC_002951.2 :305491-307015   | MVR | MR150 | OK     | 26.8587 | 27.1848 | 0.0174133    | -0.023691         | 0.9811   | 0.999883 |
| gene2570 | gene2570 | SACOL2583 | gi 57650036 ref NC_002951.2 :2647986-2648475 | MVR | MR150 | NOTEST | 0       | 0       | 0            | 0                 | 1        | 1        |
| gene2571 | gene2571 | isaA      | gi 57650036 ref NC_002951.2 :2648750-2649452 | MVR | MR150 | OK     | 2962.14 | 2945.28 | -0.008235    | 0.008493          | 0.99322  | 0.999883 |
| gene2572 | gene2572 | SACOL2585 | gi 57650036 ref NC_002951.2 :2650059-2651115 | MVR | MR150 | OK     | 3.79553 | 2.68347 | -0.500203    | 0.690516          | 0.48987  | 0.999883 |
| gene2573 | gene2573 | SACOL2587 | gi 57650036 ref NC_002951.2 :2651491-2652094 | MVR | MR150 | OK     | 21.4364 | 19.3699 | -0.146252    | 0.214978          | 0.82978  | 0.999883 |
| gene2574 | gene2574 | SACOL2588 | gi 57650036 ref NC_002951.2 :2652291-2652792 | MVR | MR150 | OK     | 3.58046 | 5.08197 | 0.505242     | -0.620676         | 0.53481  | 0.999883 |
| gene2575 | gene2575 | SACOL2589 | gi 57650036 ref NC_002951.2 :2653011-2653242 | MVR | MR150 | OK     | 21.0197 | 5.82901 | -1.85042     | 1.80668           | 0.07081  | 0.522414 |
| gene2576 | gene2576 | SACOL2590 | gi 57650036 ref NC_002951.2 :2653391-2653769 | MVR | MR150 | OK     | 19.8727 | 35.722  | 0.846023     | -1.21263          | 0.22527  | 0.89446  |
| gene2577 | gene2577 | SACOL2591 | gi 57650036 ref NC_002951.2 :2653785-2654607 | MVR | MR150 | OK     | 11.7335 | 13.0464 | 0.153028     | -0.224752         | 0.82217  | 0.999883 |
| gene2578 | gene2578 | SACOL2592 | gi 57650036 ref NC_002951.2 :2654626-2654926 | MVR | MR150 | OK     | 6.90056 | 1.41379 | -2.28715     | 1.70438           | 0.08831  | 0.597292 |
| gene2579 | gene2579 | SACOL2593 | gi 57650036 ref NC_002951.2 :2655056-2656311 | MVR | MR150 | OK     | 6.29724 | 11.1143 | 0.81962      | -0.870129         | 0.38423  | 0.999883 |
| gene258  | gene258  | SACOL0268 | gi 57650036 ref NC_002951.2 :307285-307939   | MVR | MR150 | NOTEST | 0       | 0       | 0            | 0                 | 1        | 1        |
| gene2580 | gene2580 | SACOL2594 | gi 57650036 ref NC_002951.2 :2655056-2656311 | MVR | MR150 | OK     | 4.86197 | 4.85036 | -0.0034485   | 0.00333           | 0.99734  | 0.999883 |
| gene2581 | gene2581 | SACOL2595 | gi 57650036 ref NC_002951.2 :2656320-2657419 | MVR | MR150 | NOTEST | 0       | 0       | 0            | 0                 | 1        | 1        |



|          |          |           |                                              |     |       |        |         |         |            |           |         |          |
|----------|----------|-----------|----------------------------------------------|-----|-------|--------|---------|---------|------------|-----------|---------|----------|
| gene2582 | gene2582 | SACOL2596 | gi 57650036 ref NC_002951.2 :2656320-2657419 | MVR | MR150 | OK     | 6.46455 | 9.06334 | 0.487494   | -0.70392  | 0.48148 | 0.999883 |
| gene2583 | gene2583 | SACOL2597 | gi 57650036 ref NC_002951.2 :2657438-2658269 | MVR | MR150 | OK     | 13.1008 | 18.1988 | 0.474183   | -0.696197 | 0.48631 | 0.999883 |
| gene2584 | gene2584 | SACOL2598 | gi 57650036 ref NC_002951.2 :2658415-2659306 | MVR | MR150 | OK     | 7.18877 | 4.87503 | -0.560333  | 0.800917  | 0.42318 | 0.999883 |
| gene2585 | gene2585 | SACOL2599 | gi 57650036 ref NC_002951.2 :2659403-2660723 | MVR | MR150 | OK     | 8.5378  | 8.06785 | -0.0816794 | 0.120108  | 0.9044  | 0.999883 |
| gene2586 | gene2586 | SACOL2600 | gi 57650036 ref NC_002951.2 :2660737-2661844 | MVR | MR150 | OK     | 7.68258 | 8.44213 | 0.136015   | -0.199635 | 0.84177 | 0.999883 |
| gene2587 | gene2587 | SACOL2601 | gi 57650036 ref NC_002951.2 :2662177-2662830 | MVR | MR150 | OK     | 1.92932 | 4.34557 | 1.17145    | -0.592526 | 0.5535  | 0.999883 |
| gene2588 | gene2588 | SACOL2602 | gi 57650036 ref NC_002951.2 :2662177-2662830 | MVR | MR150 | OK     | 8.92265 | 8.03925 | -0.150412  | 0.175752  | 0.86049 | 0.999883 |
| gene2589 | gene2589 | SACOL2603 | gi 57650036 ref NC_002951.2 :2662844-2663123 | MVR | MR150 | OK     | 4.52567 | 1.69174 | -1.41962   | 1.01027   | 0.31237 | 0.994118 |
| gene259  | gene259  | SACOL0269 | gi 57650036 ref NC_002951.2 :307972-308560   | MVR | MR150 | NOTEST | 0.48167 | 0.78893 | 0.711847   | -0.520439 | 0.60276 | 1        |
| gene2590 | gene2590 | SACOL2605 | gi 57650036 ref NC_002951.2 :2663464-2664274 | MVR | MR150 | OK     | 7.08439 | 4.01598 | -0.818892  | 1.14665   | 0.25153 | 0.927778 |
| gene2591 | gene2591 | pyrD      | gi 57650036 ref NC_002951.2 :2664548-2665613 | MVR | MR150 | OK     | 6.25821 | 3.71778 | -0.751307  | 1.074     | 0.28283 | 0.968672 |
| gene2592 | gene2592 | SACOL2607 | gi 57650036 ref NC_002951.2 :2665767-2666043 | MVR | MR150 | OK     | 63.6441 | 41.7473 | -0.608344  | 0.872664  | 0.38285 | 0.999883 |
| gene2593 | gene2593 | SACOL2608 | gi 57650036 ref NC_002951.2 :2666228-2666951 | MVR | MR150 | OK     | 28.7059 | 27.2231 | -0.0765172 | 0.111515  | 0.91121 | 0.999883 |
| gene2594 | gene2594 | SACOL2609 | gi 57650036 ref NC_002951.2 :2667304-2667754 | MVR | MR150 | OK     | 1760.64 | 1837.71 | 0.0618163  | -0.064649 | 0.94845 | 0.999883 |
| gene2595 | gene2595 | SACOL2610 | gi 57650036 ref NC_002951.2 :2667834-2668422 | MVR | MR150 | OK     | 13.4869 | 13.4119 | -0.0080453 | 0.011672  | 0.99069 | 0.999883 |
| gene2596 | gene2596 | SACOL2612 | gi 57650036 ref NC_002951.2 :2668554-2670237 | MVR | MR150 | OK     | 7.17565 | 6.19683 | -0.211578  | 0.310951  | 0.75584 | 0.999883 |
| gene2597 | gene2597 | panD      | gi 57650036 ref NC_002951.2 :2670365-2670749 | MVR | MR150 | OK     | 23.8318 | 41.2052 | 0.789939   | -1.14443  | 0.25245 | 0.92853  |
| gene2598 | gene2598 | panC      | gi 57650036 ref NC_002951.2 :2670750-2672413 | MVR | MR150 | OK     | 18.9013 | 20.6659 | 0.128765   | -0.116402 | 0.90733 | 0.999883 |
| gene2599 | gene2599 | panB      | gi 57650036 ref NC_002951.2 :2670750-2672413 | MVR | MR150 | OK     | 23.9783 | 32.403  | 0.434403   | -0.454979 | 0.64912 | 0.999883 |
| gene26   | gene26   | SACOL0025 | gi 57650036 ref NC_002951.2 :33575-34055     | MVR | MR150 | OK     | 44.3907 | 46.4214 | 0.064532   | -0.094492 | 0.92472 | 0.999883 |
| gene260  | gene260  | SACOL0270 | gi 57650036 ref NC_002951.2 :308702-309596   | MVR | MR150 | OK     | 7.15659 | 6.83968 | -0.0653428 | 0.094524  | 0.92469 | 0.999883 |
| gene2600 | gene2600 | SACOL2616 | gi 57650036 ref NC_002951.2 :2672485-2673346 | MVR | MR150 | OK     | 15.8805 | 17.3733 | 0.129612   | -0.190268 | 0.8491  | 0.999883 |
| gene2601 | gene2601 | budA2     | gi 57650036 ref NC_002951.2 :2673431-2674136 | MVR | MR150 | OK     | 32.089  | 28.4959 | -0.171326  | 0.249278  | 0.80315 | 0.999883 |
| gene2602 | gene2602 | ldh2      | gi 57650036 ref NC_002951.2 :2674413-2675373 | MVR | MR150 | OK     | 11.3616 | 11.2831 | -0.0100074 | 0.014716  | 0.98826 | 0.999883 |
| gene2603 | gene2603 | SACOL2619 | gi 57650036 ref NC_002951.2 :2676059-2677508 | MVR | MR150 | OK     | 99.7356 | 82.5261 | -0.273257  | 0.326883  | 0.74376 | 0.999883 |
| gene2604 | gene2604 | SACOL2620 | gi 57650036 ref NC_002951.2 :2677588-2678926 | MVR | MR150 | OK     | 17.5872 | 15.2077 | -0.209731  | 0.302185  | 0.76251 | 0.999883 |
| gene2605 | gene2605 | SACOL2621 | gi 57650036 ref NC_002951.2 :2679183-2679600 | MVR | MR150 | OK     | 3.59098 | 4.91781 | 0.45364    | -0.518069 | 0.60441 | 0.999883 |
| gene2606 | gene2606 | fdaB      | gi 57650036 ref NC_002951.2 :2679722-2680613 | MVR | MR150 | OK     | 168.673 | 197.882 | 0.230411   | -0.272398 | 0.78532 | 0.999883 |
| gene2607 | gene2607 | mqa2      | gi 57650036 ref NC_002951.2 :2680805-2682302 | MVR | MR150 | OK     | 430.26  | 457.943 | 0.0899606  | -0.092634 | 0.92619 | 0.999883 |
| gene2608 | gene2608 | SACOL2624 | gi 57650036 ref NC_002951.2 :2682986-2684585 | MVR | MR150 | OK     | 88.2195 | 107.509 | 0.285295   | -0.33401  | 0.73837 | 0.999883 |
| gene2609 | gene2609 | SACOL2625 | gi 57650036 ref NC_002951.2 :2684778-2685222 | MVR | MR150 | OK     | 20.5906 | 16.9022 | -0.284777  | 0.40969   | 0.68203 | 0.999883 |
| gene261  | gene261  | SACOL0271 | gi 57650036 ref NC_002951.2 :309843-310137   | MVR | MR150 | OK     | 649.035 | 437.991 | -0.567396  | 0.743426  | 0.45722 | 0.999883 |
| gene2610 | gene2610 | SACOL2626 | gi 57650036 ref NC_002951.2 :2685502-2685715 | MVR | MR150 | OK     | 57.7298 | 62.0228 | 0.103482   | -0.139414 | 0.88912 | 0.999883 |

|          |          |           |                                              |     |       |        |         |         |                        |           |          |          |
|----------|----------|-----------|----------------------------------------------|-----|-------|--------|---------|---------|------------------------|-----------|----------|----------|
| gene2611 | gene2611 | betA      | gi 57650036 ref NC_002951.2 :2685992-2687702 | MVR | MR150 | OK     | 65.1788 | 115.838 | 0.829633               | -0.975566 | 0.32928  | 0.999883 |
| gene2612 | gene2612 | betB      | gi 57650036 ref NC_002951.2 :2687962-2689453 | MVR | MR150 | OK     | 111.432 | 195.75  | 0.81284                | -0.917846 | 0.3587   | 0.999883 |
| gene2613 | gene2613 | SACOL2629 | gi 57650036 ref NC_002951.2 :2689521-2689617 | MVR | MR150 | NOTEST | 0       | 0       | 0                      | 0         | 1        | 1        |
| gene2614 | gene2614 | SACOL2630 | gi 57650036 ref NC_002951.2 :2689705-2690269 | MVR | MR150 | OK     | 33.1671 | 42.4641 | 0.356493               | -0.520445 | 0.60275  | 0.999883 |
| gene2615 | gene2615 | SACOL2631 | gi 57650036 ref NC_002951.2 :2690456-2691143 | MVR | MR150 | NOTEST | 0       | 0       | 0                      | 0         | 1        | 1        |
| gene2616 | gene2616 | cudT      | gi 57650036 ref NC_002951.2 :2691406-2693029 | MVR | MR150 | OK     | 92.8101 | 154.24  | 0.732821               | -0.837346 | 0.4024   | 0.999883 |
| gene2617 | gene2617 | nrdG      | gi 57650036 ref NC_002951.2 :2693547-2695931 | MVR | MR150 | OK     | 16.9798 | 18.1622 | 0.097119               | -0.080819 | 0.93559  | 0.999883 |
| gene2618 | gene2618 | nrdD      | gi 57650036 ref NC_002951.2 :2693547-2695931 | MVR | MR150 | OK     | 7.80089 | 6.12305 | -0.349388              | 0.410881  | 0.68116  | 0.999883 |
| gene2619 | gene2619 | SACOL2636 | gi 57650036 ref NC_002951.2 :2696177-2697548 | MVR | MR150 | OK     | 1.22374 | 0.78474 | -0.641014              | 0.774943  | 0.43837  | 0.999883 |
| gene262  | gene262  | SACOL0272 | gi 57650036 ref NC_002951.2 :310220-313922   | MVR | MR150 | OK     | 8.12979 | 6.6578  | -0.288172              | 0.385441  | 0.69991  | 0.999883 |
| gene2620 | gene2620 | SACOL2637 | gi 57650036 ref NC_002951.2 :2697869-2697965 | MVR | MR150 | NOTEST | 0       | 0       | 0                      | 0         | 1        | 1        |
| gene2621 | gene2621 | SACOL2638 | gi 57650036 ref NC_002951.2 :2698040-2698646 | MVR | MR150 | OK     | 11.6288 | 8.67095 | -0.423439              | 0.605114  | 0.5451   | 0.999883 |
| gene2622 | gene2622 | cysJ      | gi 57650036 ref NC_002951.2 :2698708-2700589 | MVR | MR150 | OK     | 6.24775 | 7.10722 | 0.185947               | -0.272809 | 0.785    | 0.999883 |
| gene2623 | gene2623 | SACOL2640 | gi 57650036 ref NC_002951.2 :2700783-2700876 | MVR | MR150 | NOTEST | 0       | 0       | 0                      | 0         | 1        | 1        |
| gene2624 | gene2624 | gpxA2     | gi 57650036 ref NC_002951.2 :2700983-2701481 | MVR | MR150 | OK     | 6.17395 | 2.56647 | -1.26641               | 1.51652   | 0.12939  | 0.7118   |
| gene2625 | gene2625 | SACOL2642 | gi 57650036 ref NC_002951.2 :2702175-2702289 | MVR | MR150 | NOTEST | 0       | 0       | 0                      | 0         | 1        | 1        |
| gene2626 | gene2626 | SACOL2643 | gi 57650036 ref NC_002951.2 :2702904-2705666 | MVR | MR150 | OK     | 8.72241 | 8.93007 | 0.0339447              | -0.04265  | 0.96598  | 0.999883 |
| gene2627 | gene2627 | SACOL2644 | gi 57650036 ref NC_002951.2 :2702904-2705666 | MVR | MR150 | OK     | 9.18642 | 7.85832 | -0.225283              | 0.154294  | 0.87738  | 0.999883 |
| gene2628 | gene2628 | nsaS      | gi 57650036 ref NC_002951.2 :2705764-2706652 | MVR | MR150 | OK     | 12.8573 | 14.0212 | 0.125016               | -0.183814 | 0.85416  | 0.999883 |
| gene2629 | gene2629 | SACOL2646 | gi 57650036 ref NC_002951.2 :2706662-2707328 | MVR | MR150 | OK     | 26.1887 | 22.0093 | -0.250826              | 0.368147  | 0.71276  | 0.999883 |
| gene263  | gene263  | SACOL0273 | gi 57650036 ref NC_002951.2 :310220-313922   | MVR | MR150 | OK     | 10.6456 | 9.4416  | -0.173153              | 0.079951  | 0.93628  | 0.999883 |
| gene2630 | gene2630 | SACOL2647 | gi 57650036 ref NC_002951.2 :2707353-2707554 | MVR | MR150 | OK     | 46.2431 | 29.3703 | -0.654883              | 0.782914  | 0.43368  | 0.999883 |
| gene2631 | gene2631 | SACOL2648 | gi 57650036 ref NC_002951.2 :2707751-2709176 | MVR | MR150 | OK     | 2.24007 | 1.87539 | -0.25635               | 0.351174  | 0.72546  | 0.999883 |
| gene2632 | gene2632 | SACOL2649 | gi 57650036 ref NC_002951.2 :2709235-2709337 | MVR | MR150 | OK     | 6008.4  | 6494.11 | 0.112152               | -0.050505 | 0.95972  | 0.999883 |
| gene2633 | gene2633 | SACOL2650 | gi 57650036 ref NC_002951.2 :2709458-2709914 | MVR | MR150 | OK     | 22.0613 | 19.6995 | -0.163356              | 0.237099  | 0.81258  | 0.999883 |
| gene2634 | gene2634 | SACOL2651 | gi 57650036 ref NC_002951.2 :2710158-2710920 | MVR | MR150 | OK     | 7.17274 | 6.2657  | -0.195048              | 0.277457  | 0.78143  | 0.999883 |
| gene2635 | gene2635 | clfB      | gi 57650036 ref NC_002951.2 :2711035-2713777 | MVR | MR150 | OK     | 71.7098 | 77.9766 | 0.120871               | -0.136449 | 0.89147  | 0.999883 |
| gene2636 | gene2636 | SACOL2653 | gi 57650036 ref NC_002951.2 :2714126-2714813 | MVR | MR150 | OK     | 43.3111 | 42.122  | -0.040163              | 0.057544  | 0.95411  | 0.999883 |
| gene2637 | gene2637 | arcC2     | gi 57650036 ref NC_002951.2 :2714929-2715871 | MVR | MR150 | OK     | 22.8041 | 18.5732 | -0.296067              | 0.43056   | 0.66679  | 0.999883 |
| gene2638 | gene2638 | arcD      | gi 57650036 ref NC_002951.2 :2715887-2717318 | MVR | MR150 | OK     | 12.356  | 7.83826 | -0.656611              | 0.960303  | 0.3369   | 0.999883 |
| gene2639 | gene2639 | arcB2     | gi 57650036 ref NC_002951.2 :2717408-2718419 | MVR | MR150 | OK     | 7.57912 | 5.47577 | -0.46897               | 0.680309  | 0.49631  | 0.999883 |
| gene264  | gene264  | SACOL0274 | gi 57650036 ref NC_002951.2 :310220-313922   | MVR | MR150 | OK     | 2.23444 | 0       | -1.79769e+3(-1.79769e+ | 0.42293   | 0.999883 |          |
| gene2640 | gene2640 | arcA      | gi 57650036 ref NC_002951.2 :2718451-2719687 | MVR | MR150 | OK     | 8.37944 | 7.8348  | -0.0969562             | 0.142558  | 0.88664  | 0.999883 |

|          |          |           |                                              |     |       |        |         |         |              |              |         |          |
|----------|----------|-----------|----------------------------------------------|-----|-------|--------|---------|---------|--------------|--------------|---------|----------|
| gene2641 | gene2641 | SACOL2658 | gi 57650036 ref NC_002951.2 :2720033-2720483 | MVR | MR150 | OK     | 2.05742 | 1.83344 | -0.166285    | 0.162976     | 0.87054 | 0.999883 |
| gene2642 | gene2642 | aur       | gi 57650036 ref NC_002951.2 :2720849-2722379 | MVR | MR150 | OK     | 1.2987  | 2.41832 | 0.89694      | -1.21219     | 0.22544 | 0.89446  |
| gene2643 | gene2643 | isaB      | gi 57650036 ref NC_002951.2 :2722802-2723330 | MVR | MR150 | NOTEST | 0       | 0       | 0            | 0            | 1       | 1        |
| gene2644 | gene2644 | SACOL2661 | gi 57650036 ref NC_002951.2 :2723587-2724046 | MVR | MR150 | NOTEST | 0       | 0       | 0            | 0            | 1       | 1        |
| gene2645 | gene2645 | SACOL2662 | gi 57650036 ref NC_002951.2 :2724285-2726160 | MVR | MR150 | OK     | 4.95968 | 4.20645 | -0.237646    | 0.349051     | 0.72705 | 0.999883 |
| gene2646 | gene2646 | SACOL2663 | gi 57650036 ref NC_002951.2 :2726236-2728189 | MVR | MR150 | OK     | 4.73597 | 4.1067  | -0.205682    | 0.302165     | 0.76253 | 0.999883 |
| gene2647 | gene2647 | manA2     | gi 57650036 ref NC_002951.2 :2728202-2729141 | MVR | MR150 | OK     | 6.62456 | 7.66665 | 0.21077      | -0.306036    | 0.75958 | 0.999883 |
| gene2648 | gene2648 | SACOL2665 | gi 57650036 ref NC_002951.2 :2729252-2732234 | MVR | MR150 | OK     | 17.2212 | 21.199  | 0.299809     | -0.391354    | 0.69554 | 0.999883 |
| gene2649 | gene2649 | SACOL2666 | gi 57650036 ref NC_002951.2 :2732444-2734304 | MVR | MR150 | OK     | 37.0381 | 41.4295 | 0.161649     | -0.206569    | 0.83635 | 0.999883 |
| gene265  | gene265  | SACOL0275 | gi 57650036 ref NC_002951.2 :313934-315269   | MVR | MR150 | OK     | 4.84297 | 1.88911 | -1.35818     | 1.89779      | 0.05772 | 0.48127  |
| gene2650 | gene2650 | SACOL2667 | gi 57650036 ref NC_002951.2 :2734570-2735131 | MVR | MR150 | OK     | 75.5907 | 81.8175 | 0.1142       | -0.159474    | 0.8733  | 0.999883 |
| gene2651 | gene2651 | SACOL2668 | gi 57650036 ref NC_002951.2 :2735298-2737206 | MVR | MR150 | OK     | 22.4717 | 24.7512 | 0.139385     | -0.187237    | 0.85148 | 0.999883 |
| gene2652 | gene2652 | SACOL2669 | gi 57650036 ref NC_002951.2 :2737447-2740307 | MVR | MR150 | OK     | 17.2104 | 16.2536 | -0.0825175   | 0.074447     | 0.94066 | 0.999883 |
| gene2653 | gene2653 | SACOL2670 | gi 57650036 ref NC_002951.2 :2737447-2740307 | MVR | MR150 | OK     | 17.7506 | 17.5508 | -0.0163346   | 0.016098     | 0.98716 | 0.999883 |
| gene2654 | gene2654 | SACOL2671 | gi 57650036 ref NC_002951.2 :2740324-2746753 | MVR | MR150 | OK     | 12.3892 | 14.4019 | 0.217176     | -0.247474    | 0.80454 | 0.999883 |
| gene2655 | gene2655 | SACOL2672 | gi 57650036 ref NC_002951.2 :2740324-2746753 | MVR | MR150 | OK     | 3.57534 | 4.23117 | 0.242973     | -0.087474    | 0.9303  | 0.999883 |
| gene2656 | gene2656 | SACOL2673 | gi 57650036 ref NC_002951.2 :2740324-2746753 | MVR | MR150 | OK     | 3.95709 | 1.90194 | -1.05697     | 0.41654      | 0.67702 | 0.999883 |
| gene2657 | gene2657 | SACOL2674 | gi 57650036 ref NC_002951.2 :2740324-2746753 | MVR | MR150 | OK     | 3.69388 | 2.60171 | -0.50568     | 0.216217     | 0.82882 | 0.999883 |
| gene2658 | gene2658 | secY      | gi 57650036 ref NC_002951.2 :2746763-2747975 | MVR | MR150 | OK     | 2.4269  | 2.26996 | -0.0964436   | 0.131281     | 0.89555 | 0.999883 |
| gene2659 | gene2659 | SACOL2676 | gi 57650036 ref NC_002951.2 :2748104-2754890 | MVR | MR150 | OK     | 8.18339 | 9.74625 | 0.252149     | -0.325599    | 0.74473 | 0.999883 |
| gene266  | gene266  | yukA      | gi 57650036 ref NC_002951.2 :315290-319730   | MVR | MR150 | OK     | 4.06522 | 3.32394 | -0.290437    | 0.42177      | 0.67319 | 0.999883 |
| gene2660 | gene2660 | SACOL2677 | gi 57650036 ref NC_002951.2 :2755243-2755354 | MVR | MR150 | NOTEST | 0       | 0       | 0            | 0            | 1       | 1        |
| gene2661 | gene2661 | SACOL2678 | gi 57650036 ref NC_002951.2 :2755434-2756127 | MVR | MR150 | NOTEST | 0.8726  | 0.31052 | -1.49063     | 1.07542      | 0.28219 | 1        |
| gene2662 | gene2662 | SACOL2680 | gi 57650036 ref NC_002951.2 :2756807-2757110 | MVR | MR150 | OK     | 3.67309 | 0       | -1.79769e+30 | -1.79769e+30 | 0.03257 | 0.346169 |
| gene2663 | gene2663 | SACOL2681 | gi 57650036 ref NC_002951.2 :2757263-2757623 | MVR | MR150 | OK     | 29.5052 | 14.1018 | -1.06509     | 1.48605      | 0.13727 | 0.733066 |
| gene2664 | gene2664 | SACOL2682 | gi 57650036 ref NC_002951.2 :2757707-2758319 | MVR | MR150 | OK     | 4.82076 | 2.60059 | -0.890421    | 1.1188       | 0.26323 | 0.945272 |
| gene2665 | gene2665 | SACOL2683 | gi 57650036 ref NC_002951.2 :2758397-2758874 | MVR | MR150 | OK     | 2.99387 | 3.31209 | 0.145727     | -0.165583    | 0.86849 | 0.999883 |
| gene2666 | gene2666 | SACOL2684 | gi 57650036 ref NC_002951.2 :2758876-2759377 | MVR | MR150 | OK     | 3.36985 | 2.03279 | -0.729223    | 0.806976     | 0.41968 | 0.999883 |
| gene2667 | gene2667 | cap1C     | gi 57650036 ref NC_002951.2 :2759611-2761068 | MVR | MR150 | OK     | 2.36456 | 2.69546 | 0.188962     | -0.192722    | 0.84718 | 0.999883 |
| gene2668 | gene2668 | cap1B     | gi 57650036 ref NC_002951.2 :2759611-2761068 | MVR | MR150 | OK     | 3.11643 | 1.24208 | -1.32713     | 1.08258      | 0.27899 | 0.965142 |
| gene2669 | gene2669 | cap1A     | gi 57650036 ref NC_002951.2 :2761084-2761747 | MVR | MR150 | NOTEST | 0.79901 | 0.33062 | -1.27303     | 0.905949     | 0.36496 | 1        |
| gene267  | gene267  | SACOL0277 | gi 57650036 ref NC_002951.2 :319759-320152   | MVR | MR150 | NOTEST | 0       | 0       | 0            | 0            | 1       | 1        |
| gene2670 | gene2670 | icaR      | gi 57650036 ref NC_002951.2 :2762595-2763156 | MVR | MR150 | OK     | 33.1143 | 36.4575 | 0.138764     | -0.203193    | 0.83898 | 0.999883 |

|          |          |           |                                              |     |       |        |         |         |                          |           |          |          |
|----------|----------|-----------|----------------------------------------------|-----|-------|--------|---------|---------|--------------------------|-----------|----------|----------|
| gene2671 | gene2671 | icaA      | gi 57650036 ref NC_002951.2 :2763319-2766734 | MVR | MR150 | OK     | 1.20999 | 0.8844  | -0.452223                | 0.283796  | 0.77657  | 0.999883 |
| gene2672 | gene2672 | icaD      | gi 57650036 ref NC_002951.2 :2763319-2766734 | MVR | MR150 | OK     | 1.79294 | 0       | -1.79769e+3(-1.79769e+3) | 0.30674   | 0.991033 |          |
| gene2673 | gene2673 | icaB      | gi 57650036 ref NC_002951.2 :2763319-2766734 | MVR | MR150 | OK     | 1.3391  | 0.22551 | -2.57002                 | 0.791167  | 0.42885  | 0.999883 |
| gene2674 | gene2674 | icaC      | gi 57650036 ref NC_002951.2 :2763319-2766734 | MVR | MR150 | OK     | 4.52013 | 5.03264 | 0.154953                 | -0.188777 | 0.85027  | 0.999883 |
| gene2675 | gene2675 | SACOL2693 | gi 57650036 ref NC_002951.2 :2767031-2767097 | MVR | MR150 | NOTEST | 0       | 0       | 0                        | 0         | 1        | 1        |
| gene2676 | gene2676 | geh       | gi 57650036 ref NC_002951.2 :2767124-2769167 | MVR | MR150 | OK     | 61.9303 | 70.6439 | 0.189921                 | -0.22516  | 0.82186  | 0.999883 |
| gene2677 | gene2677 | SACOL2695 | gi 57650036 ref NC_002951.2 :2769887-2770100 | MVR | MR150 | NOTEST | 0       | 0       | 0                        | 0         | 1        | 1        |
| gene2678 | gene2678 | hisI      | gi 57650036 ref NC_002951.2 :2770259-2774476 | MVR | MR150 | OK     | 4.00192 | 2.12107 | -0.9159                  | 0.469864  | 0.63845  | 0.999883 |
| gene2679 | gene2679 | hisF      | gi 57650036 ref NC_002951.2 :2770259-2774476 | MVR | MR150 | OK     | 4.59005 | 3.56048 | -0.36644                 | 0.253278  | 0.80005  | 0.999883 |
| gene268  | gene268  | SACOL0278 | gi 57650036 ref NC_002951.2 :320167-321473   | MVR | MR150 | NOTEST | 0       | 0       | 0                        | 0         | 1        | 1        |
| gene2680 | gene2680 | hisA      | gi 57650036 ref NC_002951.2 :2770259-2774476 | MVR | MR150 | OK     | 6.44211 | 4.54721 | -0.50255                 | 0.382128  | 0.70237  | 0.999883 |
| gene2681 | gene2681 | hisH      | gi 57650036 ref NC_002951.2 :2770259-2774476 | MVR | MR150 | OK     | 3.1277  | 2.01911 | -0.631384                | 0.281664  | 0.7782   | 0.999883 |
| gene2682 | gene2682 | hisB      | gi 57650036 ref NC_002951.2 :2770259-2774476 | MVR | MR150 | OK     | 2.30462 | 2.42293 | 0.0722228                | -0.030771 | 0.97545  | 0.999883 |
| gene2683 | gene2683 | SACOL2701 | gi 57650036 ref NC_002951.2 :2770259-2774476 | MVR | MR150 | OK     | 3.47908 | 1.69312 | -1.03903                 | 0.669735  | 0.50303  | 0.999883 |
| gene2684 | gene2684 | hisD      | gi 57650036 ref NC_002951.2 :2774491-2776349 | MVR | MR150 | OK     | 2.60428 | 2.02847 | -0.360493                | 0.447177  | 0.65475  | 0.999883 |
| gene2685 | gene2685 | hisG      | gi 57650036 ref NC_002951.2 :2774491-2776349 | MVR | MR150 | OK     | 2.09293 | 1.10649 | -0.919533                | 0.561858  | 0.57421  | 0.999883 |
| gene2686 | gene2686 | hisZ      | gi 57650036 ref NC_002951.2 :2776366-2777185 | MVR | MR150 | OK     | 2.84988 | 1.73146 | -0.718909                | 0.897332  | 0.36954  | 0.999883 |
| gene2687 | gene2687 | SACOL2705 | gi 57650036 ref NC_002951.2 :2777489-2778614 | MVR | MR150 | OK     | 19.6018 | 18.0459 | -0.119315                | 0.17255   | 0.86301  | 0.999883 |
| gene2688 | gene2688 | SACOL2706 | gi 57650036 ref NC_002951.2 :2778731-2779229 | MVR | MR150 | OK     | 1.49026 | 1.02659 | -0.53771                 | 0.482888  | 0.62918  | 0.999883 |
| gene2689 | gene2689 | SACOL2707 | gi 57650036 ref NC_002951.2 :2779275-2781818 | MVR | MR150 | OK     | 2.20469 | 1.44902 | -0.605502                | 0.527338  | 0.59796  | 0.999883 |
| gene269  | gene269  | SACOL0279 | gi 57650036 ref NC_002951.2 :320167-321473   | MVR | MR150 | NOTEST | 0       | 0       | 0                        | 0         | 1        | 1        |
| gene2690 | gene2690 | SACOL2708 | gi 57650036 ref NC_002951.2 :2779275-2781818 | MVR | MR150 | OK     | 2.04255 | 0.40493 | -2.33462                 | 2.1972    | 0.02801  | 0.316692 |
| gene2691 | gene2691 | SACOL2709 | gi 57650036 ref NC_002951.2 :2781870-2782425 | MVR | MR150 | OK     | 2.11801 | 1.72431 | -0.296692                | 0.318354  | 0.75022  | 0.999883 |
| gene2692 | gene2692 | SACOL2710 | gi 57650036 ref NC_002951.2 :2782453-2783302 | MVR | MR150 | OK     | 2.99381 | 3.06702 | 0.0348529                | -0.046255 | 0.96311  | 0.999883 |
| gene2693 | gene2693 | SACOL2711 | gi 57650036 ref NC_002951.2 :2783681-2784197 | MVR | MR150 | OK     | 159.522 | 217.867 | 0.449692                 | -0.582161 | 0.56046  | 0.999883 |
| gene2694 | gene2694 | drp35     | gi 57650036 ref NC_002951.2 :2784345-2785317 | MVR | MR150 | OK     | 5.08157 | 4.56214 | -0.155563                | 0.221167  | 0.82496  | 0.999883 |
| gene2695 | gene2695 | SACOL2713 | gi 57650036 ref NC_002951.2 :2785560-2786517 | MVR | MR150 | OK     | 37.7346 | 43.2884 | 0.198093                 | -0.274083 | 0.78402  | 0.999883 |
| gene2696 | gene2696 | pcp       | gi 57650036 ref NC_002951.2 :2786668-2787307 | MVR | MR150 | OK     | 5.63448 | 5.23026 | -0.107398                | 0.145979  | 0.88394  | 0.999883 |
| gene2697 | gene2697 | SACOL2715 | gi 57650036 ref NC_002951.2 :2787425-2788521 | MVR | MR150 | NOTEST | 0       | 0       | 0                        | 0         | 1        | 1        |
| gene2698 | gene2698 | SACOL2716 | gi 57650036 ref NC_002951.2 :2787425-2788521 | MVR | MR150 | NOTEST | 0       | 0       | 0                        | 0         | 1        | 1        |
| gene2699 | gene2699 | SACOL2717 | gi 57650036 ref NC_002951.2 :2788687-2789152 | MVR | MR150 | OK     | 10.1447 | 10.3831 | 0.0335108                | -0.04615  | 0.96319  | 0.999883 |
| gene27   | gene27   | SACOL0026 | gi 57650036 ref NC_002951.2 :34371-35667     | MVR | MR150 | NOTEST | 0       | 0       | 0                        | 0         | 1        | 1        |
| gene270  | gene270  | SACOL0280 | gi 57650036 ref NC_002951.2 :320167-321473   | MVR | MR150 | NOTEST | 0       | 0       | 0                        | 0         | 1        | 1        |

|          |          |           |                                              |     |       |        |         |         |                               |           |         |          |
|----------|----------|-----------|----------------------------------------------|-----|-------|--------|---------|---------|-------------------------------|-----------|---------|----------|
| gene2700 | gene2700 | SACOL2718 | gi 57650036 ref NC_002951.2 :2789389-2790808 | MVR | MR150 | OK     | 10.082  | 8.92052 | -0.176575                     | 0.258939  | 0.79568 | 0.999883 |
| gene2701 | gene2701 | rarD      | gi 57650036 ref NC_002951.2 :2791220-2792129 | MVR | MR150 | OK     | 17.7559 | 13.6061 | -0.38405                      | 0.563531  | 0.57307 | 0.999883 |
| gene2702 | gene2702 | SACOL2720 | gi 57650036 ref NC_002951.2 :2792353-2792929 | MVR | MR150 | OK     | 1.1621  | 0.81408 | -0.513492                     | 0.46114   | 0.6447  | 0.999883 |
| gene2703 | gene2703 | nixA      | gi 57650036 ref NC_002951.2 :2793057-2794110 | MVR | MR150 | OK     | 5.50226 | 5.20627 | -0.0797743                    | 0.115025  | 0.90843 | 0.999883 |
| gene2704 | gene2704 | SACOL2722 | gi 57650036 ref NC_002951.2 :2794352-2795147 | MVR | MR150 | NOTEST | 0.3072  | 0.77197 | 1.32936                       | -1.01579  | 0.30973 | 1        |
| gene2705 | gene2705 | SACOL2723 | gi 57650036 ref NC_002951.2 :2795280-2795793 | MVR | MR150 | OK     | 7.2705  | 3.42143 | -1.08745                      | 1.37622   | 0.16875 | 0.808247 |
| gene2706 | gene2706 | SACOL2724 | gi 57650036 ref NC_002951.2 :2796075-2798704 | MVR | MR150 | OK     | 2.18574 | 2.19106 | 0.00350932                    | -0.002738 | 0.99782 | 0.999883 |
| gene2707 | gene2707 | SACOL2725 | gi 57650036 ref NC_002951.2 :2796075-2798704 | MVR | MR150 | OK     | 1.97669 | 1.36677 | -0.532314                     | 0.630699  | 0.52824 | 0.999883 |
| gene2708 | gene2708 | SACOL2726 | gi 57650036 ref NC_002951.2 :2798796-2798988 | MVR | MR150 | NOTEST | 0       | 0       | 0                             | 0         | 1       | 1        |
| gene2709 | gene2709 | SACOL2727 | gi 57650036 ref NC_002951.2 :2798999-2799536 | MVR | MR150 | OK     | 1.86591 | 4.54055 | 1.28299                       | -1.46757  | 0.14222 | 0.740755 |
| gene271  | gene271  | SACOL0281 | gi 57650036 ref NC_002951.2 :321482-323327   | MVR | MR150 | NOTEST | 0       | 0       | 0                             | 0         | 1       | 1        |
| gene2710 | gene2710 | SACOL2728 | gi 57650036 ref NC_002951.2 :2799595-2800093 | MVR | MR150 | OK     | 3.40632 | 6.67283 | 0.970085                      | -1.20405  | 0.22857 | 0.898537 |
| gene2711 | gene2711 | SACOL2729 | gi 57650036 ref NC_002951.2 :2800171-2800522 | MVR | MR150 | OK     | 3.03664 | 6.94183 | 1.19284                       | -1.25338  | 0.21007 | 0.888513 |
| gene2712 | gene2712 | SACOL2730 | gi 57650036 ref NC_002951.2 :2800550-2800742 | MVR | MR150 | NOTEST | 0       | 0       | 0                             | 0         | 1       | 1        |
| gene2713 | gene2713 | SACOL2731 | gi 57650036 ref NC_002951.2 :2801134-2801335 | MVR | MR150 | OK     | 2065.53 | 2168.5  | 0.0701905                     | -0.090242 | 0.9281  | 0.999883 |
| gene2714 | gene2714 | SACOL2732 | gi 57650036 ref NC_002951.2 :2801461-2802031 | MVR | MR150 | OK     | 6.24863 | 3.30904 | -0.91713                      | 1.17943   | 0.23823 | 0.909302 |
| gene2715 | gene2715 | SACOL2733 | gi 57650036 ref NC_002951.2 :2802290-2802671 | MVR | MR150 | OK     | 9.0441  | 4.1856  | -1.11154                      | 1.31751   | 0.18767 | 0.844299 |
| gene2716 | gene2716 | SACOL2734 | gi 57650036 ref NC_002951.2 :2802753-2803107 | MVR | MR150 | OK     | 4.25552 | 0       | -1.79769e+3(-1.79769e+0.01669 | 0.231165  |         |          |
| gene2717 | gene2717 | SACOL2735 | gi 57650036 ref NC_002951.2 :2803560-2804400 | MVR | MR150 | OK     | 45.9427 | 56.2214 | 0.291285                      | -0.400554 | 0.68875 | 0.999883 |
| gene2718 | gene2718 | gidB      | gi 57650036 ref NC_002951.2 :2804442-2807039 | MVR | MR150 | OK     | 33.9481 | 36.5067 | 0.104832                      | -0.064649 | 0.94845 | 0.999883 |
| gene2719 | gene2719 | gidA      | gi 57650036 ref NC_002951.2 :2804442-2807039 | MVR | MR150 | OK     | 34.5841 | 33.0437 | -0.0657316                    | 0.07198   | 0.94262 | 0.999883 |
| gene272  | gene272  | SACOL0282 | gi 57650036 ref NC_002951.2 :323337-323829   | MVR | MR150 | NOTEST | 0.2176  | 0       | -1.79769e+3(-1.79769e+0.22252 | 1         |         |          |
| gene2720 | gene2720 | trmE      | gi 57650036 ref NC_002951.2 :2807105-2808485 | MVR | MR150 | OK     | 28.787  | 31.4098 | 0.125796                      | -0.171308 | 0.86398 | 0.999883 |
| gene2721 | gene2721 | rnpA      | gi 57650036 ref NC_002951.2 :2808623-2808971 | MVR | MR150 | OK     | 26.0972 | 25.2507 | -0.0475721                    | 0.067595  | 0.94611 | 0.999883 |
| gene2722 | gene2722 | rpmH      | gi 57650036 ref NC_002951.2 :2809097-2809235 | MVR | MR150 | OK     | 3912.94 | 3760.41 | -0.0573653                    | 0.084219  | 0.93288 | 0.999883 |
| gene273  | gene273  | SACOL0283 | gi 57650036 ref NC_002951.2 :324036-324720   | MVR | MR150 | NOTEST | 0       | 0       | 0                             | 0         | 1       | 1        |
| gene274  | gene274  | SACOL0284 | gi 57650036 ref NC_002951.2 :324866-325478   | MVR | MR150 | NOTEST | 0       | 0       | 0                             | 0         | 1       | 1        |
| gene275  | gene275  | SACOL0285 | gi 57650036 ref NC_002951.2 :325613-325832   | MVR | MR150 | OK     | 20.5288 | 10.4974 | -0.967613                     | 1.00493   | 0.31493 | 0.998619 |
| gene276  | gene276  | SACOL0286 | gi 57650036 ref NC_002951.2 :325963-326464   | MVR | MR150 | NOTEST | 0.84246 | 0.5082  | -0.729223                     | 0.485637  | 0.62722 | 1        |
| gene277  | gene277  | SACOL0287 | gi 57650036 ref NC_002951.2 :326474-326975   | MVR | MR150 | NOTEST | 0       | 0       | 0                             | 0         | 1       | 1        |
| gene278  | gene278  | SACOL0288 | gi 57650036 ref NC_002951.2 :326985-327481   | MVR | MR150 | OK     | 1.71553 | 3.1005  | 0.853843                      | -0.90586  | 0.36501 | 0.999883 |
| gene279  | gene279  | SACOL0289 | gi 57650036 ref NC_002951.2 :327491-327983   | MVR | MR150 | NOTEST | 0       | 0       | 0                             | 0         | 1       | 1        |
| gene28   | gene28   | SACOL0027 | gi 57650036 ref NC_002951.2 :36081-36321     | MVR | MR150 | NOTEST | 0       | 0       | 0                             | 0         | 1       | 1        |

|         |         |           |                                            |     |       |        |         |         |             |                   |         |          |
|---------|---------|-----------|--------------------------------------------|-----|-------|--------|---------|---------|-------------|-------------------|---------|----------|
| gene280 | gene280 | SACOL0290 | gi 57650036 ref NC_002951.2 :328192-328876 | MVR | MR150 | NOTEST | 0       | 0       | 0           | 0                 | 1       | 1        |
| gene281 | gene281 | SACOL0291 | gi 57650036 ref NC_002951.2 :329461-329962 | MVR | MR150 | NOTEST | 0       | 0       | 0           | 0                 | 1       | 1        |
| gene282 | gene282 | SACOL0292 | gi 57650036 ref NC_002951.2 :329973-330474 | MVR | MR150 | NOTEST | 0       | 0       | 0           | 0                 | 1       | 1        |
| gene283 | gene283 | SACOL0293 | gi 57650036 ref NC_002951.2 :330484-330985 | MVR | MR150 | OK     | 1.68492 | 1.01639 | -0.729223   | 0.665925          | 0.50546 | 0.999883 |
| gene284 | gene284 | SACOL0294 | gi 57650036 ref NC_002951.2 :330995-331496 | MVR | MR150 | OK     | 0.21062 | 1.01639 | 2.27078     | -1.10151          | 0.27068 | 0.954159 |
| gene285 | gene285 | SACOL0295 | gi 57650036 ref NC_002951.2 :331506-332007 | MVR | MR150 | NOTEST | 0       | 0       | 0           | 0                 | 1       | 1        |
| gene286 | gene286 | SACOL0296 | gi 57650036 ref NC_002951.2 :332017-332518 | MVR | MR150 | NOTEST | 0       | 0       | 0           | 0                 | 1       | 1        |
| gene287 | gene287 | SACOL0297 | gi 57650036 ref NC_002951.2 :332528-333017 | MVR | MR150 | NOTEST | 0.22003 | 0       | -1.79769e+3 | -1.79769e+0.22252 |         | 1        |
| gene288 | gene288 | SACOL0299 | gi 57650036 ref NC_002951.2 :333639-334014 | MVR | MR150 | OK     | 7.86354 | 5.18601 | -0.600555   | 0.717965          | 0.47278 | 0.999883 |
| gene289 | gene289 | SACOL0300 | gi 57650036 ref NC_002951.2 :334166-334565 | MVR | MR150 | OK     | 33.7713 | 30.572  | -0.143586   | 0.209869          | 0.83377 | 0.999883 |
| gene29  | gene29  | SACOL0028 | gi 57650036 ref NC_002951.2 :36352-37027   | MVR | MR150 | OK     | 198.073 | 186.277 | -0.0885808  | 0.108988          | 0.91321 | 0.999883 |
| gene290 | gene290 | SACOL0301 | gi 57650036 ref NC_002951.2 :334780-335626 | MVR | MR150 | OK     | 4.70038 | 2.84423 | -0.724739   | 0.98165           | 0.32627 | 0.999883 |
| gene291 | gene291 | brnQ2     | gi 57650036 ref NC_002951.2 :335841-337149 | MVR | MR150 | OK     | 33.8817 | 33.3119 | -0.0244692  | 0.033157          | 0.97355 | 0.999883 |
| gene292 | gene292 | SACOL0303 | gi 57650036 ref NC_002951.2 :337732-338623 | MVR | MR150 | OK     | 9.5558  | 6.64777 | -0.523506   | 0.760958          | 0.44668 | 0.999883 |
| gene293 | gene293 | SACOL0305 | gi 57650036 ref NC_002951.2 :338871-339921 | MVR | MR150 | OK     | 28.6024 | 29.1859 | 0.0291375   | -0.041174         | 0.96716 | 0.999883 |
| gene294 | gene294 | SACOL0306 | gi 57650036 ref NC_002951.2 :339933-340611 | MVR | MR150 | OK     | 48.5474 | 51.8817 | 0.0958331   | -0.1358           | 0.89198 | 0.999883 |
| gene295 | gene295 | pfoR      | gi 57650036 ref NC_002951.2 :340818-341850 | MVR | MR150 | OK     | 96.3306 | 131.232 | 0.446052    | -0.546188         | 0.58494 | 0.999883 |
| gene296 | gene296 | SACOL0308 | gi 57650036 ref NC_002951.2 :342192-344209 | MVR | MR150 | OK     | 2.679   | 2.1663  | -0.306458   | 0.319882          | 0.74906 | 0.999883 |
| gene297 | gene297 | SACOL0309 | gi 57650036 ref NC_002951.2 :342192-344209 | MVR | MR150 | OK     | 3.09085 | 2.32647 | -0.409862   | 0.399026          | 0.68987 | 0.999883 |
| gene298 | gene298 | SACOL0310 | gi 57650036 ref NC_002951.2 :344219-345440 | MVR | MR150 | OK     | 2.405   | 2.84995 | 0.244903    | -0.337697         | 0.73559 | 0.999883 |
| gene299 | gene299 | SACOL0311 | gi 57650036 ref NC_002951.2 :345544-347077 | MVR | MR150 | OK     | 6.38926 | 5.05557 | -0.337776   | 0.495909          | 0.61996 | 0.999883 |
| gene3   | gene3   | recF      | gi 57650036 ref NC_002951.2 :3696-5051     | MVR | MR150 | OK     | 177.744 | 217.383 | 0.290437    | -0.302608         | 0.76219 | 0.999883 |
| gene30  | gene30  | SACOL0029 | gi 57650036 ref NC_002951.2 :37284-37452   | MVR | MR150 | OK     | 51.9427 | 72.0211 | 0.471497    | -0.517406         | 0.60487 | 0.999883 |
| gene300 | gene300 | nanA      | gi 57650036 ref NC_002951.2 :347116-347998 | MVR | MR150 | OK     | 3.91013 | 4.4903  | 0.199597    | -0.277023         | 0.78176 | 0.999883 |
| gene301 | gene301 | SACOL0313 | gi 57650036 ref NC_002951.2 :348155-349016 | MVR | MR150 | OK     | 8.35334 | 6.94931 | -0.265482   | 0.384657          | 0.70049 | 0.999883 |
| gene302 | gene302 | SACOL0314 | gi 57650036 ref NC_002951.2 :349293-350094 | MVR | MR150 | OK     | 24.7259 | 25.7303 | 0.0574416   | -0.083587         | 0.93339 | 0.999883 |
| gene303 | gene303 | SACOL0315 | gi 57650036 ref NC_002951.2 :350233-350902 | MVR | MR150 | OK     | 9.59038 | 10.1183 | 0.0773128   | -0.111462         | 0.91125 | 0.999883 |
| gene304 | gene304 | SACOL0316 | gi 57650036 ref NC_002951.2 :351028-352342 | MVR | MR150 | OK     | 1.6633  | 1.09984 | -0.596761   | 0.758914          | 0.4479  | 0.999883 |
| gene305 | gene305 | SACOL0317 | gi 57650036 ref NC_002951.2 :352759-354694 | MVR | MR150 | OK     | 6.08479 | 4.85556 | -0.32557    | 0.478495          | 0.6323  | 0.999883 |
| gene306 | gene306 | int       | gi 57650036 ref NC_002951.2 :354784-355990 | MVR | MR150 | OK     | 2.38217 | 1.21787 | -0.96792    | 1.25021           | 0.21122 | 0.890292 |
| gene307 | gene307 | SACOL0319 | gi 57650036 ref NC_002951.2 :356183-356897 | MVR | MR150 | OK     | 11.2159 | 15.4879 | 0.465594    | -0.68119          | 0.49575 | 0.999883 |
| gene308 | gene308 | SACOL0320 | gi 57650036 ref NC_002951.2 :356974-357202 | MVR | MR150 | OK     | 15.0971 | 12.1744 | -0.310415   | 0.329589          | 0.74171 | 0.999883 |
| gene309 | gene309 | SACOL0321 | gi 57650036 ref NC_002951.2 :357356-358076 | MVR | MR150 | NOTEST | 0       | 0       | 0           | 0                 | 1       | 1        |

|         |         |           |                                            |     |       |        |         |         |             |             |         |          |
|---------|---------|-----------|--------------------------------------------|-----|-------|--------|---------|---------|-------------|-------------|---------|----------|
| gene31  | gene31  | SACOL0030 | gi 57650036 ref NC_002951.2 :37549-37780   | MVR | MR150 | NOTEST | 0       | 0       | 0           | 0           | 1       | 1        |
| gene310 | gene310 | SACOL0322 | gi 57650036 ref NC_002951.2 :358217-358436 | MVR | MR150 | NOTEST | 0       | 0       | 0           | 0           | 1       | 1        |
| gene311 | gene311 | SACOL0323 | gi 57650036 ref NC_002951.2 :358450-358759 | MVR | MR150 | NOTEST | 0       | 0       | 0           | 0           | 1       | 1        |
| gene312 | gene312 | SACOL0324 | gi 57650036 ref NC_002951.2 :358762-358915 | MVR | MR150 | NOTEST | 0       | 0       | 0           | 0           | 1       | 1        |
| gene313 | gene313 | SACOL0325 | gi 57650036 ref NC_002951.2 :358915-359707 | MVR | MR150 | NOTEST | 0       | 0       | 0           | 0           | 1       | 1        |
| gene314 | gene314 | SACOL0326 | gi 57650036 ref NC_002951.2 :359707-359932 | MVR | MR150 | NOTEST | 0       | 0       | 0           | 0           | 1       | 1        |
| gene315 | gene315 | SACOL0327 | gi 57650036 ref NC_002951.2 :359971-360551 | MVR | MR150 | NOTEST | 0       | 0       | 0           | 0           | 1       | 1        |
| gene316 | gene316 | SACOL0328 | gi 57650036 ref NC_002951.2 :359971-360551 | MVR | MR150 | NOTEST | 0       | 0       | 0           | 0           | 1       | 1        |
| gene317 | gene317 | SACOL0329 | gi 57650036 ref NC_002951.2 :360604-361172 | MVR | MR150 | NOTEST | 0       | 0       | 0           | 0           | 1       | 1        |
| gene318 | gene318 | SACOL0330 | gi 57650036 ref NC_002951.2 :360604-361172 | MVR | MR150 | NOTEST | 0       | 0       | 0           | 0           | 1       | 1        |
| gene319 | gene319 | SACOL0331 | gi 57650036 ref NC_002951.2 :361219-361640 | MVR | MR150 | NOTEST | 0       | 0       | 0           | 0           | 1       | 1        |
| gene32  | gene32  | SACOL0031 | gi 57650036 ref NC_002951.2 :38328-39072   | MVR | MR150 | OK     | 81.2926 | 74.016  | -0.135287   | 0.181138    | 0.85626 | 0.999883 |
| gene320 | gene320 | SACOL0332 | gi 57650036 ref NC_002951.2 :361219-361640 | MVR | MR150 | NOTEST | 0       | 0       | 0           | 0           | 1       | 1        |
| gene321 | gene321 | SACOL0333 | gi 57650036 ref NC_002951.2 :361694-361958 | MVR | MR150 | OK     | 3.50431 | 0       | -1.79769e+3 | -1.79769e+0 | 0.06333 | 0.504373 |
| gene322 | gene322 | SACOL0334 | gi 57650036 ref NC_002951.2 :361970-362132 | MVR | MR150 | NOTEST | 0       | 0       | 0           | 0           | 1       | 1        |
| gene323 | gene323 | SACOL0335 | gi 57650036 ref NC_002951.2 :362221-362539 | MVR | MR150 | NOTEST | 0       | 0       | 0           | 0           | 1       | 1        |
| gene324 | gene324 | SACOL0336 | gi 57650036 ref NC_002951.2 :362543-362804 | MVR | MR150 | NOTEST | 0       | 0       | 0           | 0           | 1       | 1        |
| gene325 | gene325 | SACOL0337 | gi 57650036 ref NC_002951.2 :362813-364070 | MVR | MR150 | NOTEST | 0       | 0       | 0           | 0           | 1       | 1        |
| gene326 | gene326 | SACOL0338 | gi 57650036 ref NC_002951.2 :362813-364070 | MVR | MR150 | NOTEST | 0       | 0       | 0           | 0           | 1       | 1        |
| gene327 | gene327 | ssb1      | gi 57650036 ref NC_002951.2 :362813-364070 | MVR | MR150 | NOTEST | 0       | 0       | 0           | 0           | 1       | 1        |
| gene328 | gene328 | SACOL0340 | gi 57650036 ref NC_002951.2 :364083-367357 | MVR | MR150 | OK     | 16.598  | 20.0619 | 0.273449    | -0.337499   | 0.73574 | 0.999883 |
| gene329 | gene329 | SACOL0341 | gi 57650036 ref NC_002951.2 :364083-367357 | MVR | MR150 | OK     | 1.82404 | 0.76427 | -1.255      | 0.420176    | 0.67436 | 0.999883 |
| gene33  | gene33  | maoC      | gi 57650036 ref NC_002951.2 :39168-39597   | MVR | MR150 | OK     | 29.387  | 33.321  | 0.181255    | -0.265628   | 0.79053 | 0.999883 |
| gene330 | gene330 | SACOL0342 | gi 57650036 ref NC_002951.2 :364083-367357 | MVR | MR150 | OK     | 4.17551 | 2.87028 | -0.54076    | 0.161855    | 0.87142 | 0.999883 |
| gene331 | gene331 | SACOL0343 | gi 57650036 ref NC_002951.2 :364083-367357 | MVR | MR150 | OK     | 2.98733 | 1.1758  | -1.34521    | 0.743288    | 0.45731 | 0.999883 |
| gene332 | gene332 | SACOL0344 | gi 57650036 ref NC_002951.2 :364083-367357 | MVR | MR150 | NOTEST | 0       | 0       | 0           | 0           | 1       | 1        |
| gene333 | gene333 | SACOL0345 | gi 57650036 ref NC_002951.2 :367359-367581 | MVR | MR150 | OK     | 13.541  | 13.3382 | -0.021778   | 0.022527    | 0.98203 | 0.999883 |
| gene334 | gene334 | SACOL0346 | gi 57650036 ref NC_002951.2 :367590-368417 | MVR | MR150 | NOTEST | 0       | 0       | 0           | 0           | 1       | 1        |
| gene335 | gene335 | SACOL0347 | gi 57650036 ref NC_002951.2 :367590-368417 | MVR | MR150 | OK     | 1.58902 | 0.7426  | -1.09748    | 0.691581    | 0.4892  | 0.999883 |
| gene336 | gene336 | SACOL0348 | gi 57650036 ref NC_002951.2 :368421-368607 | MVR | MR150 | NOTEST | 0       | 0       | 0           | 0           | 1       | 1        |
| gene337 | gene337 | SACOL0349 | gi 57650036 ref NC_002951.2 :368607-368865 | MVR | MR150 | NOTEST | 0       | 0       | 0           | 0           | 1       | 1        |
| gene338 | gene338 | SACOL0350 | gi 57650036 ref NC_002951.2 :368876-369233 | MVR | MR150 | NOTEST | 0       | 0       | 0           | 0           | 1       | 1        |
| gene339 | gene339 | SACOL0351 | gi 57650036 ref NC_002951.2 :369236-369479 | MVR | MR150 | OK     | 2.23444 | 2.48354 | 0.15249     | -0.085961   | 0.9315  | 0.999883 |

|         |         |           |                                            |     |       |        |         |         |              |              |         |          |
|---------|---------|-----------|--------------------------------------------|-----|-------|--------|---------|---------|--------------|--------------|---------|----------|
| gene34  | gene34  | mecA      | gi 57650036 ref NC_002951.2 :39642-41649   | MVR | MR150 | OK     | 420.81  | 510.8   | 0.279589     | -0.28566     | 0.77514 | 0.999883 |
| gene340 | gene340 | SACOL0352 | gi 57650036 ref NC_002951.2 :369492-369699 | MVR | MR150 | OK     | 0       | 4.33328 | 1.79769e+30  | 1.79769e+30  | 0.10824 | 0.653986 |
| gene341 | gene341 | SACOL0353 | gi 57650036 ref NC_002951.2 :369701-370981 | MVR | MR150 | NOTEST | 0.64554 | 0       | -1.79769e+30 | -1.79769e+30 | 0.32964 | 1        |
| gene342 | gene342 | SACOL0354 | gi 57650036 ref NC_002951.2 :369701-370981 | MVR | MR150 | OK     | 23.8855 | 14.1404 | -0.756318    | 0.866351     | 0.3863  | 0.999883 |
| gene343 | gene343 | SACOL0355 | gi 57650036 ref NC_002951.2 :369701-370981 | MVR | MR150 | OK     | 11.6736 | 10.5426 | -0.147015    | 0.113657     | 0.90951 | 0.999883 |
| gene344 | gene344 | SACOL0356 | gi 57650036 ref NC_002951.2 :369701-370981 | MVR | MR150 | OK     | 3.62557 | 2.68362 | -0.434031    | 0.120182     | 0.90434 | 0.999883 |
| gene345 | gene345 | dut       | gi 57650036 ref NC_002951.2 :370985-371528 | MVR | MR150 | OK     | 12.0848 | 13.83   | 0.194604     | -0.2796      | 0.77978 | 0.999883 |
| gene346 | gene346 | SACOL0358 | gi 57650036 ref NC_002951.2 :371564-372307 | MVR | MR150 | OK     | 11.7227 | 17.3331 | 0.56423      | -0.44153     | 0.65883 | 0.999883 |
| gene347 | gene347 | SACOL0359 | gi 57650036 ref NC_002951.2 :371564-372307 | MVR | MR150 | NOTEST | 0       | 0       | 0            | 0            | 1       | 1        |
| gene348 | gene348 | SACOL0360 | gi 57650036 ref NC_002951.2 :371564-372307 | MVR | MR150 | OK     | 18.6451 | 13.7972 | -0.434425    | 0.346502     | 0.72897 | 0.999883 |
| gene349 | gene349 | SACOL0361 | gi 57650036 ref NC_002951.2 :371564-372307 | MVR | MR150 | NOTEST | 0       | 0       | 0            | 0            | 1       | 1        |
| gene35  | gene35  | mecR1     | gi 57650036 ref NC_002951.2 :41748-44481   | MVR | MR150 | OK     | 115.116 | 150.796 | 0.389511     | -0.470818    | 0.63777 | 0.999883 |
| gene350 | gene350 | SACOL0362 | gi 57650036 ref NC_002951.2 :372374-372882 | MVR | MR150 | NOTEST | 0       | 0       | 0            | 0            | 1       | 1        |
| gene351 | gene351 | SACOL0363 | gi 57650036 ref NC_002951.2 :372374-372882 | MVR | MR150 | OK     | 3.47045 | 2.97507 | -0.222199    | 0.205572     | 0.83713 | 0.999883 |
| gene352 | gene352 | SACOL0364 | gi 57650036 ref NC_002951.2 :372894-373332 | MVR | MR150 | OK     | 1.62682 | 1.28318 | -0.342327    | 0.301023     | 0.7634  | 0.999883 |
| gene353 | gene353 | SACOL0365 | gi 57650036 ref NC_002951.2 :373488-373803 | MVR | MR150 | NOTEST | 0.55737 | 0       | -1.79769e+30 | -1.79769e+30 | 0.22252 | 1        |
| gene354 | gene354 | SACOL0366 | gi 57650036 ref NC_002951.2 :373931-375918 | MVR | MR150 | OK     | 4.78118 | 2.69701 | -0.826005    | 0.402774     | 0.68712 | 0.999883 |
| gene355 | gene355 | SACOL0367 | gi 57650036 ref NC_002951.2 :373931-375918 | MVR | MR150 | OK     | 1.4343  | 1.9505  | 0.443493     | -0.569026    | 0.56934 | 0.999883 |
| gene356 | gene356 | SACOL0368 | gi 57650036 ref NC_002951.2 :375922-377918 | MVR | MR150 | OK     | 13.137  | 13.7082 | 0.0614004    | -0.082384    | 0.93434 | 0.999883 |
| gene357 | gene357 | SACOL0369 | gi 57650036 ref NC_002951.2 :375922-377918 | MVR | MR150 | OK     | 3.72078 | 4.53442 | 0.285313     | -0.156362    | 0.87575 | 0.999883 |
| gene358 | gene358 | SACOL0370 | gi 57650036 ref NC_002951.2 :377929-379093 | MVR | MR150 | OK     | 5.91036 | 2.22408 | -1.41004     | 1.97146      | 0.04867 | 0.43325  |
| gene359 | gene359 | SACOL0371 | gi 57650036 ref NC_002951.2 :379161-379440 | MVR | MR150 | OK     | 1.50856 | 0       | -1.79769e+30 | -1.79769e+30 | 0.14006 | 0.736107 |
| gene36  | gene36  | SACOL0035 | gi 57650036 ref NC_002951.2 :41748-44481   | MVR | MR150 | NOTEST | 0       | 0       | 0            | 0            | 1       | 1        |
| gene360 | gene360 | SACOL0372 | gi 57650036 ref NC_002951.2 :379451-380182 | MVR | MR150 | OK     | 1.9573  | 1.11165 | -0.816166    | 0.417404     | 0.67638 | 0.999883 |
| gene361 | gene361 | SACOL0373 | gi 57650036 ref NC_002951.2 :379451-380182 | MVR | MR150 | OK     | 1.61385 | 2.2599  | 0.485754     | -0.375577    | 0.70723 | 0.999883 |
| gene362 | gene362 | SACOL0374 | gi 57650036 ref NC_002951.2 :380182-380578 | MVR | MR150 | OK     | 2.99815 | 3.10241 | 0.0493186    | -0.051014    | 0.95931 | 0.999883 |
| gene363 | gene363 | SACOL0375 | gi 57650036 ref NC_002951.2 :380612-381254 | MVR | MR150 | OK     | 2.65719 | 0.34632 | -2.93973     | 2.25156      | 0.02435 | 0.296308 |
| gene364 | gene364 | SACOL0376 | gi 57650036 ref NC_002951.2 :381345-381801 | MVR | MR150 | OK     | 12.0334 | 6.56651 | -0.873849    | 1.17326      | 0.24069 | 0.911371 |
| gene365 | gene365 | SACOL0377 | gi 57650036 ref NC_002951.2 :381858-382209 | MVR | MR150 | OK     | 1.73522 | 0       | -1.79769e+30 | -1.79769e+30 | 0.06333 | 0.504373 |
| gene366 | gene366 | SACOL0378 | gi 57650036 ref NC_002951.2 :382250-382409 | MVR | MR150 | OK     | 7.21565 | 0       | -1.79769e+30 | -1.79769e+30 | 0.22252 | 0.89416  |
| gene367 | gene367 | SACOL0379 | gi 57650036 ref NC_002951.2 :382422-389447 | MVR | MR150 | OK     | 2.06502 | 0.8169  | -1.33792     | 1.92367      | 0.0544  | 0.462964 |
| gene368 | gene368 | SACOL0380 | gi 57650036 ref NC_002951.2 :382422-389447 | MVR | MR150 | NOTEST | 0.97291 | 0       | -1.79769e+30 | -1.79769e+30 | 0.26349 | 1        |
| gene369 | gene369 | SACOL0381 | gi 57650036 ref NC_002951.2 :389455-391329 | MVR | MR150 | OK     | 1.03212 | 0.88533 | -0.22132     | 0.267711     | 0.78892 | 0.999883 |



|         |         |           |                                            |     |       |        |         |         |                         |           |          |          |
|---------|---------|-----------|--------------------------------------------|-----|-------|--------|---------|---------|-------------------------|-----------|----------|----------|
| gene37  | gene37  | SACOL0036 | gi 57650036 ref NC_002951.2 :41748-44481   | MVR | MR150 | NOTEST | 0       | 0       | 0                       | 0         | 1        | 1        |
| gene370 | gene370 | SACOL0382 | gi 57650036 ref NC_002951.2 :389455-391329 | MVR | MR150 | OK     | 1.35361 | 0       | -1.79769e+3(-1.79769e+3 | 0.25032   | 0.925217 |          |
| gene371 | gene371 | SACOL0383 | gi 57650036 ref NC_002951.2 :391344-395267 | MVR | MR150 | OK     | 1.69885 | 0.35808 | -2.24619                | 2.31429   | 0.02065  | 0.267842 |
| gene372 | gene372 | SACOL0384 | gi 57650036 ref NC_002951.2 :391344-395267 | MVR | MR150 | NOTEST | 0.65873 | 0.24177 | -1.44607                | 0.915846  | 0.35975  | 1        |
| gene373 | gene373 | SACOL0385 | gi 57650036 ref NC_002951.2 :391344-395267 | MVR | MR150 | NOTEST | 0.68817 | 0.79917 | 0.215728                | -0.062658 | 0.95004  | 1        |
| gene374 | gene374 | SACOL0386 | gi 57650036 ref NC_002951.2 :391344-395267 | MVR | MR150 | NOTEST | 0       | 0       | 0                       | 0         | 1        | 1        |
| gene375 | gene375 | SACOL0387 | gi 57650036 ref NC_002951.2 :395312-395612 | MVR | MR150 | OK     | 1.25465 | 0       | -1.79769e+3(-1.79769e+3 | 0.14006   | 0.736107 |          |
| gene376 | gene376 | SACOL0388 | gi 57650036 ref NC_002951.2 :395747-396050 | MVR | MR150 | NOTEST | 0       | 0       | 0                       | 0         | 1        | 1        |
| gene377 | gene377 | SACOL0389 | gi 57650036 ref NC_002951.2 :396061-397516 | MVR | MR150 | OK     | 1.56785 | 0.48815 | -1.68338                | 1.96658   | 0.04923  | 0.435566 |
| gene378 | gene378 | SACOL0390 | gi 57650036 ref NC_002951.2 :398285-398408 | MVR | MR150 | NOTEST | 0       | 0       | 0                       | 0         | 1        | 1        |
| gene379 | gene379 | SACOL0391 | gi 57650036 ref NC_002951.2 :398649-399477 | MVR | MR150 | OK     | 1.45212 | 1.95047 | 0.425663                | -0.506015 | 0.61285  | 0.999883 |
| gene38  | gene38  | SACOL0037 | gi 57650036 ref NC_002951.2 :44616-45123   | MVR | MR150 | NOTEST | 0       | 0       | 0                       | 0         | 1        | 1        |
| gene380 | gene380 | SACOL0392 | gi 57650036 ref NC_002951.2 :399549-400749 | MVR | MR150 | OK     | 4.43409 | 3.21607 | -0.46334                | 0.658999  | 0.5099   | 0.999883 |
| gene381 | gene381 | SACOL0393 | gi 57650036 ref NC_002951.2 :400844-400937 | MVR | MR150 | NOTEST | 0       | 0       | 0                       | 0         | 1        | 1        |
| gene382 | gene382 | SACOL0394 | gi 57650036 ref NC_002951.2 :401050-402052 | MVR | MR150 | OK     | 6.01315 | 7.06469 | 0.232504                | -0.337479 | 0.73576  | 0.999883 |
| gene383 | gene383 | SACOL0395 | gi 57650036 ref NC_002951.2 :402085-402418 | MVR | MR150 | OK     | 7.33986 | 3.33494 | -1.13809                | 1.19869   | 0.23065  | 0.899834 |
| gene384 | gene384 | SACOL0396 | gi 57650036 ref NC_002951.2 :402418-405153 | MVR | MR150 | OK     | 7.70152 | 6.87839 | -0.163073               | 0.133412  | 0.89387  | 0.999883 |
| gene385 | gene385 | SACOL0397 | gi 57650036 ref NC_002951.2 :402418-405153 | MVR | MR150 | OK     | 6.16394 | 8.63263 | 0.485948                | -0.444681 | 0.65655  | 0.999883 |
| gene386 | gene386 | SACOL0398 | gi 57650036 ref NC_002951.2 :402418-405153 | MVR | MR150 | OK     | 4.46456 | 5.02383 | 0.170268                | -0.132353 | 0.89471  | 0.999883 |
| gene387 | gene387 | SACOL0399 | gi 57650036 ref NC_002951.2 :405467-406493 | MVR | MR150 | OK     | 11.9582 | 15.573  | 0.381042                | -0.558703 | 0.57636  | 0.999883 |
| gene388 | gene388 | ulaA      | gi 57650036 ref NC_002951.2 :406585-407932 | MVR | MR150 | OK     | 4.11421 | 4.40634 | 0.0989653               | -0.143243 | 0.8861   | 0.999883 |
| gene389 | gene389 | SACOL0401 | gi 57650036 ref NC_002951.2 :407946-408231 | MVR | MR150 | OK     | 2.85475 | 1.6031  | -0.832501               | 0.554417  | 0.57929  | 0.999883 |
| gene39  | gene39  | SACOL0038 | gi 57650036 ref NC_002951.2 :45137-45449   | MVR | MR150 | NOTEST | 0       | 0       | 0                       | 0         | 1        | 1        |
| gene390 | gene390 | SACOL0402 | gi 57650036 ref NC_002951.2 :408232-408676 | MVR | MR150 | OK     | 3.43177 | 0.62601 | -2.4547                 | 1.84687   | 0.06477  | 0.508364 |
| gene391 | gene391 | SACOL0403 | gi 57650036 ref NC_002951.2 :408680-410636 | MVR | MR150 | OK     | 3.81599 | 2.79127 | -0.451133               | 0.657222  | 0.51104  | 0.999883 |
| gene392 | gene392 | SACOL0404 | gi 57650036 ref NC_002951.2 :410847-411267 | MVR | MR150 | OK     | 37.749  | 38.8175 | 0.040269                | -0.059184 | 0.95281  | 0.999883 |
| gene393 | gene393 | SACOL0405 | gi 57650036 ref NC_002951.2 :411373-412729 | MVR | MR150 | OK     | 2.68656 | 1.72232 | -0.641407               | 0.875501  | 0.3813   | 0.999883 |
| gene394 | gene394 | SACOL0406 | gi 57650036 ref NC_002951.2 :412832-413273 | MVR | MR150 | OK     | 11.5031 | 12.6741 | 0.13986                 | -0.193861 | 0.84629  | 0.999883 |
| gene395 | gene395 | gIpT      | gi 57650036 ref NC_002951.2 :413355-414714 | MVR | MR150 | OK     | 49.1063 | 53.3859 | 0.120551                | -0.155692 | 0.87628  | 0.999883 |
| gene396 | gene396 | SACOL0408 | gi 57650036 ref NC_002951.2 :415021-415882 | MVR | MR150 | OK     | 58.7487 | 82.6968 | 0.493274                | -0.654277 | 0.51293  | 0.999883 |
| gene397 | gene397 | SACOL0409 | gi 57650036 ref NC_002951.2 :415961-417023 | MVR | MR150 | OK     | 45.639  | 67.1529 | 0.55718                 | -0.73589  | 0.4618   | 0.999883 |
| gene398 | gene398 | SACOL0410 | gi 57650036 ref NC_002951.2 :417036-417603 | MVR | MR150 | OK     | 73.0815 | 103.834 | 0.506705                | -0.698447 | 0.4849   | 0.999883 |
| gene399 | gene399 | SACOL0411 | gi 57650036 ref NC_002951.2 :417662-418658 | MVR | MR150 | OK     | 13.559  | 16.352  | 0.270218                | -0.395959 | 0.69214  | 0.999883 |

|         |         |           |                                            |     |       |        |         |         |            |           |         |          |
|---------|---------|-----------|--------------------------------------------|-----|-------|--------|---------|---------|------------|-----------|---------|----------|
| gene4   | gene4   | gyrB      | gi 57650036 ref NC_002951.2 :5060-6995     | MVR | MR150 | OK     | 118.277 | 132.336 | 0.162032   | -0.180502 | 0.85676 | 0.999883 |
| gene40  | gene40  | SACOL0039 | gi 57650036 ref NC_002951.2 :45450-45886   | MVR | MR150 | NOTEST | 0       | 0       | 0          | 0         | 1       | 1        |
| gene400 | gene400 | SACOL0412 | gi 57650036 ref NC_002951.2 :418755-419052 | MVR | MR150 | OK     | 3.21554 | 1.44852 | -1.15048   | 0.798421  | 0.42463 | 0.999883 |
| gene401 | gene401 | SACOL0413 | gi 57650036 ref NC_002951.2 :419131-419677 | MVR | MR150 | OK     | 17.9593 | 20.3444 | 0.179894   | -0.263232 | 0.79237 | 0.999883 |
| gene402 | gene402 | SACOL0414 | gi 57650036 ref NC_002951.2 :419944-423718 | MVR | MR150 | OK     | 2.22402 | 2.80517 | 0.334922   | -0.225468 | 0.82162 | 0.999883 |
| gene403 | gene403 | SACOL0415 | gi 57650036 ref NC_002951.2 :419944-423718 | MVR | MR150 | OK     | 2.96482 | 1.63556 | -0.858161  | 0.687364  | 0.49185 | 0.999883 |
| gene404 | gene404 | SACOL0416 | gi 57650036 ref NC_002951.2 :419944-423718 | MVR | MR150 | OK     | 2.63175 | 2.02466 | -0.378342  | 0.379778  | 0.70411 | 0.999883 |
| gene405 | gene405 | SACOL0417 | gi 57650036 ref NC_002951.2 :423809-424466 | MVR | MR150 | OK     | 11.4761 | 8.709   | -0.398049  | 0.573213  | 0.5665  | 0.999883 |
| gene406 | gene406 | SACOL0418 | gi 57650036 ref NC_002951.2 :424527-424743 | MVR | MR150 | OK     | 18.2654 | 18.3956 | 0.0102505  | -0.011179 | 0.99108 | 0.999883 |
| gene407 | gene407 | SACOL0419 | gi 57650036 ref NC_002951.2 :424851-425241 | MVR | MR150 | OK     | 12.3871 | 14.385  | 0.215728   | -0.294222 | 0.76859 | 0.999883 |
| gene408 | gene408 | SACOL0420 | gi 57650036 ref NC_002951.2 :425481-426395 | MVR | MR150 | OK     | 10.3584 | 27.5944 | 1.41357    | -0.794447 | 0.42694 | 0.999883 |
| gene409 | gene409 | SACOL0421 | gi 57650036 ref NC_002951.2 :425481-426395 | MVR | MR150 | OK     | 4.41476 | 2.97843 | -0.567783  | 0.663588  | 0.50695 | 0.999883 |
| gene41  | gene41  | SACOL0040 | gi 57650036 ref NC_002951.2 :45450-45886   | MVR | MR150 | NOTEST | 0       | 0       | 0          | 0         | 1       | 1        |
| gene410 | gene410 | SACOL0422 | gi 57650036 ref NC_002951.2 :426419-427891 | MVR | MR150 | OK     | 6.32902 | 5.00062 | -0.339877  | 0.1451    | 0.88463 | 0.999883 |
| gene411 | gene411 | SACOL0424 | gi 57650036 ref NC_002951.2 :426419-427891 | MVR | MR150 | OK     | 77.4614 | 76.5348 | -0.0173621 | 0.022388  | 0.98214 | 0.999883 |
| gene412 | gene412 | SACOL0425 | gi 57650036 ref NC_002951.2 :428257-429391 | MVR | MR150 | OK     | 9.63971 | 8.52611 | -0.177101  | 0.260387  | 0.79457 | 0.999883 |
| gene413 | gene413 | SACOL0426 | gi 57650036 ref NC_002951.2 :429929-431111 | MVR | MR150 | OK     | 26.8601 | 28.6952 | 0.0953451  | -0.133411 | 0.89387 | 0.999883 |
| gene414 | gene414 | SACOL0427 | gi 57650036 ref NC_002951.2 :431193-431946 | MVR | MR150 | OK     | 11.0526 | 9.13613 | -0.274729  | 0.399799  | 0.6893  | 0.999883 |
| gene415 | gene415 | metE      | gi 57650036 ref NC_002951.2 :431988-438284 | MVR | MR150 | OK     | 3.87992 | 1.81183 | -1.09858   | 1.0502    | 0.29362 | 0.976946 |
| gene416 | gene416 | SACOL0429 | gi 57650036 ref NC_002951.2 :431988-438284 | MVR | MR150 | OK     | 3.43413 | 1.95892 | -0.809886  | 0.688727  | 0.491   | 0.999883 |
| gene417 | gene417 | SACOL0430 | gi 57650036 ref NC_002951.2 :431988-438284 | MVR | MR150 | OK     | 1.99723 | 0.95615 | -1.06269   | 0.502394  | 0.61539 | 0.999883 |
| gene418 | gene418 | SACOL0431 | gi 57650036 ref NC_002951.2 :431988-438284 | MVR | MR150 | OK     | 1.79428 | 1.52462 | -0.234953  | 0.11625   | 0.90746 | 0.999883 |
| gene419 | gene419 | SACOL0432 | gi 57650036 ref NC_002951.2 :438947-439793 | MVR | MR150 | OK     | 5.64046 | 3.55529 | -0.665845  | 0.923181  | 0.35591 | 0.999883 |
| gene42  | gene42  | ccrB      | gi 57650036 ref NC_002951.2 :46351-47976   | MVR | MR150 | NOTEST | 0       | 0       | 0          | 0         | 1       | 1        |
| gene420 | gene420 | SACOL0433 | gi 57650036 ref NC_002951.2 :439949-440831 | MVR | MR150 | OK     | 8.35345 | 8.30705 | -0.0080353 | 0.011709  | 0.99066 | 0.999883 |
| gene421 | gene421 | SACOL0434 | gi 57650036 ref NC_002951.2 :440860-441064 | MVR | MR150 | OK     | 33.1469 | 22.9953 | -0.527534  | 0.601076  | 0.54779 | 0.999883 |
| gene422 | gene422 | SACOL0435 | gi 57650036 ref NC_002951.2 :441075-442173 | MVR | MR150 | OK     | 37.3363 | 36.1532 | -0.046455  | 0.063773  | 0.94915 | 0.999883 |
| gene423 | gene423 | SACOL0436 | gi 57650036 ref NC_002951.2 :442258-442450 | MVR | MR150 | OK     | 1038.19 | 1621.28 | 0.643065   | -0.886181 | 0.37552 | 0.999883 |
| gene424 | gene424 | rpsF      | gi 57650036 ref NC_002951.2 :442693-442990 | MVR | MR150 | OK     | 326.056 | 434.557 | 0.414425   | -0.561215 | 0.57465 | 0.999883 |
| gene425 | gene425 | ssb2      | gi 57650036 ref NC_002951.2 :443010-443514 | MVR | MR150 | OK     | 216.302 | 195.241 | -0.147789  | 0.190416  | 0.84898 | 0.999883 |
| gene426 | gene426 | rpsR      | gi 57650036 ref NC_002951.2 :443565-443808 | MVR | MR150 | OK     | 650.221 | 764.931 | 0.234401   | -0.314825 | 0.75289 | 0.999883 |
| gene427 | gene427 | SACOL0440 | gi 57650036 ref NC_002951.2 :444073-445012 | MVR | MR150 | OK     | 2.28997 | 2.27927 | -0.0067563 | 0.008771  | 0.993   | 0.999883 |
| gene428 | gene428 | SACOL0441 | gi 57650036 ref NC_002951.2 :445050-445598 | MVR | MR150 | OK     | 2.70441 | 2.19866 | -0.29869   | 0.338019  | 0.73535 | 0.999883 |

|         |         |           |                                            |     |       |        |         |         |             |             |         |          |
|---------|---------|-----------|--------------------------------------------|-----|-------|--------|---------|---------|-------------|-------------|---------|----------|
| gene429 | gene429 | SACOL0442 | gi 57650036 ref NC_002951.2 :445957-446569 | MVR | MR150 | OK     | 5.12206 | 3.71513 | -0.46331    | 0.605242    | 0.54502 | 0.999883 |
| gene43  | gene43  | ccrA1     | gi 57650036 ref NC_002951.2 :47997-49347   | MVR | MR150 | NOTEST | 0       | 0       | 0           | 0           | 1       | 1        |
| gene430 | gene430 | SACOL0443 | gi 57650036 ref NC_002951.2 :446937-447306 | MVR | MR150 | OK     | 1.55177 | 0       | -1.79769e+3 | -1.79769e+0 | 0.06333 | 0.504373 |
| gene431 | gene431 | SACOL0444 | gi 57650036 ref NC_002951.2 :447486-448059 | MVR | MR150 | OK     | 22.9387 | 13.9505 | -0.717471   | 1.04848     | 0.29442 | 0.977693 |
| gene432 | gene432 | SACOL0445 | gi 57650036 ref NC_002951.2 :448196-448460 | MVR | MR150 | OK     | 162.074 | 201.611 | 0.314917    | -0.459735   | 0.64571 | 0.999883 |
| gene433 | gene433 | SACOL0446 | gi 57650036 ref NC_002951.2 :448759-449011 | MVR | MR150 | OK     | 634.718 | 428.14  | -0.568033   | 0.778406    | 0.43633 | 0.999883 |
| gene434 | gene434 | SACOL0447 | gi 57650036 ref NC_002951.2 :449436-450018 | MVR | MR150 | OK     | 15.0182 | 7.21178 | -1.05828    | 1.5019      | 0.13312 | 0.723829 |
| gene435 | gene435 | SACOL0448 | gi 57650036 ref NC_002951.2 :450083-450467 | MVR | MR150 | OK     | 82.8777 | 89.0031 | 0.102873    | -0.149599   | 0.88108 | 0.999883 |
| gene436 | gene436 | SACOL0449 | gi 57650036 ref NC_002951.2 :450721-451348 | MVR | MR150 | OK     | 51.783  | 55.5635 | 0.101659    | -0.144628   | 0.88501 | 0.999883 |
| gene437 | gene437 | SACOL0450 | gi 57650036 ref NC_002951.2 :451420-451714 | MVR | MR150 | OK     | 52.1075 | 40.0873 | -0.378346   | 0.544495    | 0.5861  | 0.999883 |
| gene438 | gene438 | ahpF      | gi 57650036 ref NC_002951.2 :451792-453316 | MVR | MR150 | OK     | 958.409 | 1312.16 | 0.453229    | -0.467835   | 0.6399  | 0.999883 |
| gene439 | gene439 | ahpC      | gi 57650036 ref NC_002951.2 :453331-453901 | MVR | MR150 | OK     | 889.839 | 1203.66 | 0.435813    | -0.461461   | 0.64447 | 0.999883 |
| gene44  | gene44  | SACOL0043 | gi 57650036 ref NC_002951.2 :49534-51600   | MVR | MR150 | NOTEST | 0       | 0       | 0           | 0           | 1       | 1        |
| gene440 | gene440 | SACOL0453 | gi 57650036 ref NC_002951.2 :454392-455148 | MVR | MR150 | OK     | 128.037 | 162.187 | 0.341097    | -0.425919   | 0.67017 | 0.999883 |
| gene441 | gene441 | SACOL0454 | gi 57650036 ref NC_002951.2 :455228-456617 | MVR | MR150 | OK     | 39.7596 | 37.355  | -0.0900028  | 0.119354    | 0.905   | 0.999883 |
| gene442 | gene442 | SACOL0455 | gi 57650036 ref NC_002951.2 :457593-458550 | MVR | MR150 | OK     | 79.9367 | 89.2065 | 0.15829     | -0.202858   | 0.83925 | 0.999883 |
| gene443 | gene443 | SACOL0456 | gi 57650036 ref NC_002951.2 :458667-459330 | MVR | MR150 | OK     | 62.4563 | 61.1655 | -0.030128   | 0.042018    | 0.96649 | 0.999883 |
| gene444 | gene444 | SACOL0457 | gi 57650036 ref NC_002951.2 :459472-459880 | MVR | MR150 | OK     | 1054.72 | 975.999 | -0.111905   | 0.125569    | 0.90007 | 0.999883 |
| gene445 | gene445 | xpt       | gi 57650036 ref NC_002951.2 :460391-462238 | MVR | MR150 | OK     | 43.294  | 64.6115 | 0.577624    | -0.381938   | 0.70251 | 0.999883 |
| gene446 | gene446 | pbuX      | gi 57650036 ref NC_002951.2 :460391-462238 | MVR | MR150 | OK     | 42.4773 | 55.73   | 0.391762    | -0.421236   | 0.67358 | 0.999883 |
| gene447 | gene447 | guaB      | gi 57650036 ref NC_002951.2 :462275-463742 | MVR | MR150 | OK     | 109.349 | 116.894 | 0.0962579   | -0.112065   | 0.91077 | 0.999883 |
| gene448 | gene448 | guaA      | gi 57650036 ref NC_002951.2 :463766-465308 | MVR | MR150 | OK     | 166.673 | 190.823 | 0.19522     | -0.215412   | 0.82945 | 0.999883 |
| gene449 | gene449 | SACOL0462 | gi 57650036 ref NC_002951.2 :465420-465957 | MVR | MR150 | OK     | 3.17205 | 3.63244 | 0.195523    | -0.235806   | 0.81358 | 0.999883 |
| gene45  | gene45  | SACOL0044 | gi 57650036 ref NC_002951.2 :49534-51600   | MVR | MR150 | NOTEST | 0       | 0       | 0           | 0           | 1       | 1        |
| gene450 | gene450 | SACOL0463 | gi 57650036 ref NC_002951.2 :466349-467054 | MVR | MR150 | OK     | 4.13267 | 4.54721 | 0.137907    | -0.185491   | 0.85284 | 0.999883 |
| gene451 | gene451 | SACOL0464 | gi 57650036 ref NC_002951.2 :467452-467725 | MVR | MR150 | OK     | 2.39752 | 1.78971 | -0.421815   | 0.264041    | 0.79175 | 0.999883 |
| gene452 | gene452 | SACOL0465 | gi 57650036 ref NC_002951.2 :467985-468138 | MVR | MR150 | OK     | 46.5922 | 45.5773 | -0.0317711  | 0.026899    | 0.97854 | 0.999883 |
| gene453 | gene453 | SACOL0466 | gi 57650036 ref NC_002951.2 :468661-469021 | MVR | MR150 | OK     | 33.6032 | 62.9881 | 0.90648     | -1.32162    | 0.18629 | 0.840333 |
| gene454 | gene454 | SACOL0467 | gi 57650036 ref NC_002951.2 :469039-469885 | MVR | MR150 | OK     | 46.8158 | 65.8914 | 0.493094    | -0.671007   | 0.50222 | 0.999883 |
| gene455 | gene455 | SACOL0468 | gi 57650036 ref NC_002951.2 :470356-471037 | MVR | MR150 | OK     | 13.6883 | 7.63828 | -0.841625   | 1.21381     | 0.22482 | 0.89446  |
| gene456 | gene456 | SACOL0469 | gi 57650036 ref NC_002951.2 :471322-472018 | MVR | MR150 | OK     | 3.5921  | 2.7778  | -0.370886   | 0.474727    | 0.63498 | 0.999883 |
| gene457 | gene457 | SACOL0470 | gi 57650036 ref NC_002951.2 :472308-473367 | MVR | MR150 | OK     | 2.52126 | 1.42619 | -0.821985   | 1.05534     | 0.29127 | 0.975616 |
| gene458 | gene458 | SACOL0471 | gi 57650036 ref NC_002951.2 :473485-473623 | MVR | MR150 | NOTEST | 0       | 0       | 0           | 0           | 1       | 1        |

|         |         |           |                                            |     |       |        |         |         |              |                   |          |          |
|---------|---------|-----------|--------------------------------------------|-----|-------|--------|---------|---------|--------------|-------------------|----------|----------|
| gene459 | gene459 | SACOL0472 | gi 57650036 ref NC_002951.2 :473731-474658 | MVR | MR150 | OK     | 1.6636  | 0       | -1.79769e+30 | -1.79769e+0.00637 | 0.125174 |          |
| gene46  | gene46  | SACOL0045 | gi 57650036 ref NC_002951.2 :51770-53348   | MVR | MR150 | NOTEST | 0       | 0       | 0            | 0                 | 1        | 1        |
| gene460 | gene460 | SACOL0473 | gi 57650036 ref NC_002951.2 :475037-475736 | MVR | MR150 | OK     | 1.477   | 0.92037 | -0.682388    | 0.702769          | 0.4822   | 0.999883 |
| gene461 | gene461 | SACOL0474 | gi 57650036 ref NC_002951.2 :476101-476785 | MVR | MR150 | OK     | 4.19412 | 3.47919 | -0.269614    | 0.354251          | 0.72315  | 0.999883 |
| gene462 | gene462 | SACOL0475 | gi 57650036 ref NC_002951.2 :476869-476971 | MVR | MR150 | NOTEST | 0       | 0       | 0            | 0                 | 1        | 1        |
| gene463 | gene463 | hsdM1     | gi 57650036 ref NC_002951.2 :477048-479809 | MVR | MR150 | OK     | 14.7862 | 17.2688 | 0.223917     | -0.225805         | 0.82135  | 0.999883 |
| gene464 | gene464 | SACOL0477 | gi 57650036 ref NC_002951.2 :477048-479809 | MVR | MR150 | OK     | 15.5677 | 18.4624 | 0.246036     | -0.220384         | 0.82557  | 0.999883 |
| gene465 | gene465 | SACOL0478 | gi 57650036 ref NC_002951.2 :480191-480869 | MVR | MR150 | NOTEST | 0.90141 | 0.32026 | -1.49295     | 1.07709           | 0.28144  | 1        |
| gene466 | gene466 | SACOL0479 | gi 57650036 ref NC_002951.2 :480890-482399 | MVR | MR150 | OK     | 3.68667 | 3.15914 | -0.222785    | 0.32084           | 0.74833  | 0.999883 |
| gene467 | gene467 | SACOL0480 | gi 57650036 ref NC_002951.2 :482502-482811 | MVR | MR150 | OK     | 3189.82 | 1978.06 | -0.689385    | 0.750756          | 0.4528   | 0.999883 |
| gene468 | gene468 | SACOL0481 | gi 57650036 ref NC_002951.2 :483148-483949 | MVR | MR150 | OK     | 2.33072 | 3.31182 | 0.506845     | -0.65449          | 0.5128   | 0.999883 |
| gene469 | gene469 | SACOL0482 | gi 57650036 ref NC_002951.2 :483980-484772 | MVR | MR150 | NOTEST | 0       | 0       | 0            | 0                 | 1        | 1        |
| gene47  | gene47  | SACOL0046 | gi 57650036 ref NC_002951.2 :53427-54756   | MVR | MR150 | NOTEST | 0       | 0       | 0            | 0                 | 1        | 1        |
| gene470 | gene470 | SACOL0483 | gi 57650036 ref NC_002951.2 :484841-485618 | MVR | MR150 | NOTEST | 0       | 0       | 0            | 0                 | 1        | 1        |
| gene471 | gene471 | SACOL0484 | gi 57650036 ref NC_002951.2 :485793-486609 | MVR | MR150 | NOTEST | 0       | 0.24856 | 1.79769e+30  | 1.79769e+0.10824  | 1        | 1        |
| gene472 | gene472 | SACOL0485 | gi 57650036 ref NC_002951.2 :486627-487413 | MVR | MR150 | OK     | 5.20196 | 7.83816 | 0.59146      | -0.838839         | 0.40156  | 0.999883 |
| gene473 | gene473 | SACOL0486 | gi 57650036 ref NC_002951.2 :487592-490046 | MVR | MR150 | OK     | 33.0877 | 41.0116 | 0.309738     | -0.244958         | 0.80649  | 0.999883 |
| gene474 | gene474 | SACOL0487 | gi 57650036 ref NC_002951.2 :487592-490046 | MVR | MR150 | OK     | 27.3314 | 31.0114 | 0.182236     | -0.173846         | 0.86199  | 0.999883 |
| gene475 | gene475 | SACOL0488 | gi 57650036 ref NC_002951.2 :487592-490046 | MVR | MR150 | OK     | 30.248  | 44.9066 | 0.570089     | -0.200507         | 0.84108  | 0.999883 |
| gene476 | gene476 | SACOL0489 | gi 57650036 ref NC_002951.2 :490064-490379 | MVR | MR150 | OK     | 69.6709 | 89.4702 | 0.360851     | -0.529791         | 0.59626  | 0.999883 |
| gene477 | gene477 | SACOL0490 | gi 57650036 ref NC_002951.2 :490668-490929 | MVR | MR150 | OK     | 18.9983 | 4.03937 | -2.23367     | 2.22217           | 0.02627  | 0.30765  |
| gene478 | gene478 | SACOL0491 | gi 57650036 ref NC_002951.2 :491047-492250 | MVR | MR150 | OK     | 3.5842  | 1.06882 | -1.74563     | 2.26105           | 0.02376  | 0.292955 |
| gene479 | gene479 | nuoF      | gi 57650036 ref NC_002951.2 :493837-495322 | MVR | MR150 | OK     | 14.0533 | 22.6461 | 0.688353     | -0.974407         | 0.32985  | 0.999883 |
| gene48  | gene48  | SACOL0047 | gi 57650036 ref NC_002951.2 :54774-55842   | MVR | MR150 | NOTEST | 0       | 0       | 0            | 0                 | 1        | 1        |
| gene480 | gene480 | SACOL0495 | gi 57650036 ref NC_002951.2 :495334-498040 | MVR | MR150 | OK     | 29.2225 | 41.0153 | 0.489085     | -0.603596         | 0.54611  | 0.999883 |
| gene481 | gene481 | SACOL0496 | gi 57650036 ref NC_002951.2 :498201-498564 | MVR | MR150 | OK     | 117.064 | 141.372 | 0.272203     | -0.38972          | 0.69674  | 0.999883 |
| gene482 | gene482 | SACOL0497 | gi 57650036 ref NC_002951.2 :498792-499140 | MVR | MR150 | OK     | 17.2507 | 21.2106 | 0.29813      | -0.411687         | 0.68057  | 0.999883 |
| gene483 | gene483 | SACOL0498 | gi 57650036 ref NC_002951.2 :499246-499921 | MVR | MR150 | OK     | 9.85178 | 14.8248 | 0.589557     | -0.857157         | 0.39136  | 0.999883 |
| gene484 | gene484 | SACOL0499 | gi 57650036 ref NC_002951.2 :499957-500692 | MVR | MR150 | OK     | 17.3914 | 18.6004 | 0.0969625    | -0.142551         | 0.88665  | 0.999883 |
| gene485 | gene485 | SACOL0500 | gi 57650036 ref NC_002951.2 :500801-500918 | MVR | MR150 | OK     | 132.094 | 0       | -1.79769e+30 | -1.79769e+0.22252 | 0.89416  | 0.89416  |
| gene486 | gene486 | SACOL0501 | gi 57650036 ref NC_002951.2 :501147-502485 | MVR | MR150 | OK     | 2.67746 | 0.67291 | -1.99239     | 2.45469           | 0.0141   | 0.204943 |
| gene487 | gene487 | SACOL0502 | gi 57650036 ref NC_002951.2 :502701-504742 | MVR | MR150 | OK     | 30.3801 | 34.4795 | 0.182612     | -0.110344         | 0.91214  | 0.999883 |
| gene488 | gene488 | SACOL0503 | gi 57650036 ref NC_002951.2 :502701-504742 | MVR | MR150 | OK     | 75.9809 | 75.191  | -0.0150769   | 0.016029          | 0.98721  | 0.999883 |

|         |         |            |                                            |     |       |        |         |         |            |           |         |          |
|---------|---------|------------|--------------------------------------------|-----|-------|--------|---------|---------|------------|-----------|---------|----------|
| gene489 | gene489 | SACOL0504  | gi 57650036 ref NC_002951.2 :505035-506061 | MVR | MR150 | OK     | 12.5415 | 11.3089 | -0.149251  | 0.219398  | 0.82634 | 0.999883 |
| gene49  | gene49  | SACOL0048  | gi 57650036 ref NC_002951.2 :55980-56241   | MVR | MR150 | NOTEST | 0       | 0       | 0          | 0         | 1       | 1        |
| gene490 | gene490 | SACOL0505  | gi 57650036 ref NC_002951.2 :506064-506724 | MVR | MR150 | OK     | 8.31324 | 10.3161 | 0.311422   | -0.446371 | 0.65533 | 0.999883 |
| gene491 | gene491 | SACOL0506  | gi 57650036 ref NC_002951.2 :506760-507603 | MVR | MR150 | OK     | 32.5897 | 39.0524 | 0.260994   | -0.370805 | 0.71078 | 0.999883 |
| gene492 | gene492 | SACOL0507  | gi 57650036 ref NC_002951.2 :507934-508939 | MVR | MR150 | OK     | 521.51  | 461.679 | -0.175804  | 0.18519   | 0.85308 | 0.999883 |
| gene493 | gene493 | SACOL0508  | gi 57650036 ref NC_002951.2 :509123-509393 | MVR | MR150 | OK     | 307.963 | 291.135 | -0.0810683 | 0.115041  | 0.90841 | 0.999883 |
| gene494 | gene494 | SACOL0509  | gi 57650036 ref NC_002951.2 :509541-510412 | MVR | MR150 | OK     | 13.6582 | 12.4097 | -0.138308  | 0.093692  | 0.92535 | 0.999883 |
| gene495 | gene495 | SACOL0510  | gi 57650036 ref NC_002951.2 :509541-510412 | MVR | MR150 | OK     | 30.7068 | 34.2232 | 0.156415   | -0.203234 | 0.83895 | 0.999883 |
| gene496 | gene496 | SACOL0511  | gi 57650036 ref NC_002951.2 :510580-512472 | MVR | MR150 | OK     | 14.1206 | 15.4943 | 0.133935   | -0.136854 | 0.89115 | 0.999883 |
| gene497 | gene497 | SACOL0512  | gi 57650036 ref NC_002951.2 :510580-512472 | MVR | MR150 | OK     | 8.81483 | 10.064  | 0.1912     | -0.195821 | 0.84475 | 0.999883 |
| gene498 | gene498 | gltC       | gi 57650036 ref NC_002951.2 :512592-513477 | MVR | MR150 | OK     | 2.6539  | 1.11766 | -1.24763   | 1.49727   | 0.13432 | 0.727616 |
| gene499 | gene499 | gltB       | gi 57650036 ref NC_002951.2 :513657-518157 | MVR | MR150 | OK     | 3.98082 | 2.42255 | -0.716539  | 1.04454   | 0.29624 | 0.9791   |
| gene5   | gene5   | gyrA       | gi 57650036 ref NC_002951.2 :7031-9695     | MVR | MR150 | OK     | 124.295 | 140.747 | 0.179332   | -0.191977 | 0.84776 | 0.999883 |
| gene50  | gene50  | SACOL0049  | gi 57650036 ref NC_002951.2 :56264-56996   | MVR | MR150 | NOTEST | 0       | 0       | 0          | 0         | 1       | 1        |
| gene500 | gene500 | gltD       | gi 57650036 ref NC_002951.2 :518174-519638 | MVR | MR150 | OK     | 3.7261  | 3.63509 | -0.0356764 | 0.05151   | 0.95892 | 0.999883 |
| gene501 | gene501 | SACOL_tRNA | gi 57650036 ref NC_002951.2 :519906-519999 | MVR | MR150 | NOTEST | 0       | 0       | 0          | 0         | 1       | 1        |
| gene502 | gene502 | SACOL0516  | gi 57650036 ref NC_002951.2 :520469-521897 | MVR | MR150 | OK     | 73.3494 | 112.872 | 0.621833   | -0.744997 | 0.45627 | 0.999883 |
| gene503 | gene503 | SACOL0517  | gi 57650036 ref NC_002951.2 :521960-523601 | MVR | MR150 | OK     | 14.1987 | 18.4945 | 0.381331   | -0.540303 | 0.58899 | 0.999883 |
| gene504 | gene504 | SACOL0518  | gi 57650036 ref NC_002951.2 :523625-524354 | MVR | MR150 | OK     | 21.5343 | 26.9146 | 0.321751   | -0.470638 | 0.6379  | 0.999883 |
| gene505 | gene505 | SACOL0519  | gi 57650036 ref NC_002951.2 :524992-525517 | MVR | MR150 | OK     | 13.1903 | 13.6526 | 0.0496949  | -0.071343 | 0.94313 | 0.999883 |
| gene506 | gene506 | dnaX       | gi 57650036 ref NC_002951.2 :525585-527283 | MVR | MR150 | OK     | 50.9882 | 50.1008 | -0.025329  | 0.031806  | 0.97463 | 0.999883 |
| gene507 | gene507 | SACOL0521  | gi 57650036 ref NC_002951.2 :527372-527690 | MVR | MR150 | OK     | 315.533 | 320.578 | 0.0228862  | -0.031019 | 0.97525 | 0.999883 |
| gene508 | gene508 | recR       | gi 57650036 ref NC_002951.2 :527696-528293 | MVR | MR150 | OK     | 214.828 | 184.286 | -0.221235  | 0.277127  | 0.78168 | 0.999883 |
| gene509 | gene509 | rrsA       | gi 57650036 ref NC_002951.2 :529145-530700 | MVR | MR150 | OK     | 10770   | 14333.4 | 0.412359   | -0.585707 | 0.55807 | 0.999883 |
| gene51  | gene51  | pls        | gi 57650036 ref NC_002951.2 :57211-61858   | MVR | MR150 | NOTEST | 0.01323 | 0.03445 | 1.38114    | -0.621961 | 0.53397 | 1        |
| gene510 | gene510 | rrlA       | gi 57650036 ref NC_002951.2 :531064-533987 | MVR | MR150 | HIDATA | 0       | 33882.3 | 0          | 0         | 1       | 1        |
| gene511 | gene511 | rrfA       | gi 57650036 ref NC_002951.2 :534059-534174 | MVR | MR150 | OK     | 373015  | 129984  | -1.5209    | 1.89925   | 0.05753 | 0.48127  |
| gene512 | gene512 | SACOL0523  | gi 57650036 ref NC_002951.2 :535056-536394 | MVR | MR150 | OK     | 10.6573 | 8.34402 | -0.353032  | 0.518197  | 0.60432 | 0.999883 |
| gene513 | gene513 | tmk        | gi 57650036 ref NC_002951.2 :536395-537013 | MVR | MR150 | OK     | 28.7816 | 29.2948 | 0.0255014  | -0.037374 | 0.97019 | 0.999883 |
| gene514 | gene514 | SACOL0525  | gi 57650036 ref NC_002951.2 :537040-537370 | MVR | MR150 | OK     | 763.526 | 799.596 | 0.0665942  | -0.080945 | 0.93549 | 0.999883 |
| gene515 | gene515 | SACOL0526  | gi 57650036 ref NC_002951.2 :537583-538510 | MVR | MR150 | OK     | 50.4072 | 66.5575 | 0.400971   | -0.536746 | 0.59144 | 0.999883 |
| gene516 | gene516 | SACOL0527  | gi 57650036 ref NC_002951.2 :538510-539314 | MVR | MR150 | OK     | 46.6759 | 53.233  | 0.189644   | -0.262925 | 0.79261 | 0.999883 |
| gene517 | gene517 | SACOL0528  | gi 57650036 ref NC_002951.2 :539330-539678 | MVR | MR150 | OK     | 65.9064 | 109.083 | 0.726934   | -1.06098  | 0.2887  | 0.975616 |

|         |         |           |                                            |     |       |        |         |         |            |           |         |          |
|---------|---------|-----------|--------------------------------------------|-----|-------|--------|---------|---------|------------|-----------|---------|----------|
| gene518 | gene518 | SACOL0529 | gi 57650036 ref NC_002951.2 :539951-540918 | MVR | MR150 | OK     | 12.2291 | 13.6795 | 0.161702   | -0.213962 | 0.83058 | 0.999883 |
| gene519 | gene519 | SACOL0530 | gi 57650036 ref NC_002951.2 :539951-540918 | MVR | MR150 | OK     | 22.8221 | 27.708  | 0.279871   | -0.177725 | 0.85894 | 0.999883 |
| gene52  | gene52  | SACOL0051 | gi 57650036 ref NC_002951.2 :61981-63598   | MVR | MR150 | NOTEST | 0       | 0       | 0          | 0         | 1       | 1        |
| gene520 | gene520 | SACOL0531 | gi 57650036 ref NC_002951.2 :540919-541759 | MVR | MR150 | OK     | 11.8654 | 9.80884 | -0.274601  | 0.402492  | 0.68732 | 0.999883 |
| gene521 | gene521 | SACOL0532 | gi 57650036 ref NC_002951.2 :541783-541939 | MVR | MR150 | NOTEST | 0       | 0       | 0          | 0         | 1       | 1        |
| gene522 | gene522 | metS      | gi 57650036 ref NC_002951.2 :542043-544017 | MVR | MR150 | OK     | 30.0134 | 29.0974 | -0.0447168 | 0.058497  | 0.95335 | 0.999883 |
| gene523 | gene523 | SACOL0534 | gi 57650036 ref NC_002951.2 :544047-544821 | MVR | MR150 | OK     | 49.5395 | 49.0784 | -0.0134912 | 0.018826  | 0.98498 | 0.999883 |
| gene524 | gene524 | SACOL0535 | gi 57650036 ref NC_002951.2 :544987-545524 | MVR | MR150 | OK     | 24.4434 | 22.7027 | -0.106581  | 0.156603  | 0.87556 | 0.999883 |
| gene525 | gene525 | ksgA      | gi 57650036 ref NC_002951.2 :545534-546428 | MVR | MR150 | OK     | 21.5571 | 18.754  | -0.200963  | 0.293269  | 0.76932 | 0.999883 |
| gene526 | gene526 | SACOL0537 | gi 57650036 ref NC_002951.2 :546527-546791 | MVR | MR150 | OK     | 7532.52 | 8829.78 | 0.229244   | -0.236006 | 0.81343 | 0.999883 |
| gene527 | gene527 | ipk       | gi 57650036 ref NC_002951.2 :547100-547949 | MVR | MR150 | OK     | 38.3582 | 43.4101 | 0.178495   | -0.250541 | 0.80217 | 0.999883 |
| gene528 | gene528 | purR      | gi 57650036 ref NC_002951.2 :547962-548787 | MVR | MR150 | OK     | 55.7477 | 55.1201 | -0.0163328 | 0.02232   | 0.98219 | 0.999883 |
| gene529 | gene529 | SACOL0540 | gi 57650036 ref NC_002951.2 :548803-549184 | MVR | MR150 | OK     | 84.6528 | 84.5491 | -0.0017692 | 0.002576  | 0.99794 | 0.999883 |
| gene53  | gene53  | SACOL0052 | gi 57650036 ref NC_002951.2 :63757-65269   | MVR | MR150 | NOTEST | 0       | 0       | 0          | 0         | 1       | 1        |
| gene530 | gene530 | spoVG     | gi 57650036 ref NC_002951.2 :549255-549558 | MVR | MR150 | OK     | 340.373 | 357.541 | 0.0709943  | -0.096444 | 0.92317 | 0.999883 |
| gene531 | gene531 | SACOL0542 | gi 57650036 ref NC_002951.2 :549747-549879 | MVR | MR150 | NOTEST | 0       | 0       | 0          | 0         | 1       | 1        |
| gene532 | gene532 | glmU      | gi 57650036 ref NC_002951.2 :549901-551254 | MVR | MR150 | OK     | 50.0924 | 53.2651 | 0.0885993  | -0.114385 | 0.90893 | 0.999883 |
| gene533 | gene533 | prsA      | gi 57650036 ref NC_002951.2 :551400-552366 | MVR | MR150 | OK     | 106.551 | 117.145 | 0.136756   | -0.16936  | 0.86551 | 0.999883 |
| gene534 | gene534 | rplY      | gi 57650036 ref NC_002951.2 :552515-553169 | MVR | MR150 | OK     | 937.4   | 863.838 | -0.117904  | 0.123963  | 0.90134 | 0.999883 |
| gene535 | gene535 | pth       | gi 57650036 ref NC_002951.2 :553479-560527 | MVR | MR150 | OK     | 34.9941 | 47.1854 | 0.43123    | -0.108938 | 0.91325 | 0.999883 |
| gene536 | gene536 | mfd       | gi 57650036 ref NC_002951.2 :553479-560527 | MVR | MR150 | OK     | 41.6565 | 47.0631 | 0.176055   | -0.140441 | 0.88831 | 0.999883 |
| gene537 | gene537 | SACOL0548 | gi 57650036 ref NC_002951.2 :553479-560527 | MVR | MR150 | OK     | 34.5172 | 38.319  | 0.150744   | -0.068848 | 0.94511 | 0.999883 |
| gene538 | gene538 | SACOL0549 | gi 57650036 ref NC_002951.2 :553479-560527 | MVR | MR150 | OK     | 55.588  | 68.5613 | 0.302619   | -0.155655 | 0.87631 | 0.999883 |
| gene539 | gene539 | SACOL0550 | gi 57650036 ref NC_002951.2 :553479-560527 | MVR | MR150 | OK     | 35.0431 | 35.233  | 0.00779514 | -0.000821 | 0.99935 | 0.999883 |
| gene54  | gene54  | SACOL0054 | gi 57650036 ref NC_002951.2 :65291-67344   | MVR | MR150 | NOTEST | 0       | 0       | 0          | 0         | 1       | 1        |
| gene540 | gene540 | SACOL0551 | gi 57650036 ref NC_002951.2 :560544-560937 | MVR | MR150 | OK     | 79.2156 | 105.488 | 0.413218   | -0.597264 | 0.55033 | 0.999883 |
| gene541 | gene541 | SACOL0552 | gi 57650036 ref NC_002951.2 :561041-561443 | MVR | MR150 | OK     | 287.266 | 332.206 | 0.209693   | -0.270385 | 0.78686 | 0.999883 |
| gene542 | gene542 | SACOL0553 | gi 57650036 ref NC_002951.2 :561622-562918 | MVR | MR150 | OK     | 9.27445 | 9.36235 | 0.0136094  | -0.019999 | 0.98404 | 0.999883 |
| gene543 | gene543 | hpt       | gi 57650036 ref NC_002951.2 :562922-563462 | MVR | MR150 | OK     | 24.9522 | 26.5534 | 0.0897282  | -0.131918 | 0.89505 | 0.999883 |
| gene544 | gene544 | SACOL0555 | gi 57650036 ref NC_002951.2 :563718-565812 | MVR | MR150 | OK     | 170.903 | 183.582 | 0.103243   | -0.110235 | 0.91222 | 0.999883 |
| gene545 | gene545 | hslO      | gi 57650036 ref NC_002951.2 :566040-566922 | MVR | MR150 | OK     | 47.6324 | 58.5984 | 0.298917   | -0.406662 | 0.68426 | 0.999883 |
| gene546 | gene546 | cysK      | gi 57650036 ref NC_002951.2 :567100-568033 | MVR | MR150 | OK     | 157.448 | 160.228 | 0.0252505  | -0.030133 | 0.97596 | 0.999883 |
| gene547 | gene547 | folP      | gi 57650036 ref NC_002951.2 :568248-569868 | MVR | MR150 | OK     | 16.9364 | 13.435  | -0.334131  | 0.290565  | 0.77138 | 0.999883 |

|         |         |             |                                            |     |       |        |         |         |            |           |         |          |
|---------|---------|-------------|--------------------------------------------|-----|-------|--------|---------|---------|------------|-----------|---------|----------|
| gene548 | gene548 | folB        | gi 57650036 ref NC_002951.2 :568248-569868 | MVR | MR150 | OK     | 11.455  | 15.4426 | 0.430933   | -0.181198 | 0.85621 | 0.999883 |
| gene549 | gene549 | folK        | gi 57650036 ref NC_002951.2 :568248-569868 | MVR | MR150 | OK     | 43.7566 | 49.1293 | 0.167082   | -0.171218 | 0.86405 | 0.999883 |
| gene55  | gene55  | SACOL0057   | gi 57650036 ref NC_002951.2 :68406-68499   | MVR | MR150 | NOTEST | 0       | 0       | 0          | 0         | 1       | 1        |
| gene550 | gene550 | SACOL0561   | gi 57650036 ref NC_002951.2 :570261-570354 | MVR | MR150 | NOTEST | 0       | 0       | 0          | 0         | 1       | 1        |
| gene551 | gene551 | lysS        | gi 57650036 ref NC_002951.2 :570406-571894 | MVR | MR150 | OK     | 121.923 | 115.345 | -0.0800103 | 0.092489  | 0.92631 | 0.999883 |
| gene552 | gene552 | rrfG        | gi 57650036 ref NC_002951.2 :572451-572566 | MVR | MR150 | OK     | 409779  | 134529  | -1.60693   | 1.99159   | 0.04642 | 0.423595 |
| gene554 | gene554 | rrsB        | gi 57650036 ref NC_002951.2 :572775-574330 | MVR | MR150 | OK     | 10550.1 | 14934.4 | 0.501383   | -0.713794 | 0.47536 | 0.999883 |
| gene555 | gene555 | SACOL_tRNA- | gi 57650036 ref NC_002951.2 :574422-574499 | MVR | MR150 | NOTEST | 0       | 0       | 0          | 0         | 1       | 1        |
| gene556 | gene556 | rrlB        | gi 57650036 ref NC_002951.2 :574666-577589 | MVR | MR150 | HIDATA | 0       | 38209.6 | 0          | 0         | 1       | 1        |
| gene557 | gene557 | rrfB        | gi 57650036 ref NC_002951.2 :577661-577776 | MVR | MR150 | OK     | 546950  | 169070  | -1.69379   | 2.04197   | 0.04115 | 0.395011 |
| gene558 | gene558 | rrsC        | gi 57650036 ref NC_002951.2 :577987-579542 | MVR | MR150 | OK     | 11084.7 | 15002.9 | 0.436673   | -0.62557  | 0.5316  | 0.999883 |
| gene559 | gene559 | rrlC        | gi 57650036 ref NC_002951.2 :579844-582767 | MVR | MR150 | HIDATA | 0       | 30782.3 | 0          | 0         | 1       | 1        |
| gene56  | gene56  | SACOL0058   | gi 57650036 ref NC_002951.2 :68645-70391   | MVR | MR150 | NOTEST | 0       | 0       | 0          | 0         | 1       | 1        |
| gene560 | gene560 | rrfC        | gi 57650036 ref NC_002951.2 :582839-582954 | MVR | MR150 | OK     | 386541  | 534934  | 0.468738   | -0.541129 | 0.58842 | 0.999883 |
| gene561 | gene561 | SACOL0563   | gi 57650036 ref NC_002951.2 :583478-584861 | MVR | MR150 | OK     | 1.41292 | 1.55356 | 0.136901   | -0.178861 | 0.85805 | 0.999883 |
| gene562 | gene562 | SACOL0564   | gi 57650036 ref NC_002951.2 :584964-585852 | MVR | MR150 | OK     | 167.145 | 237.469 | 0.506641   | -0.593404 | 0.55291 | 0.999883 |
| gene563 | gene563 | SACOL0565   | gi 57650036 ref NC_002951.2 :585855-586416 | MVR | MR150 | OK     | 222.611 | 308.193 | 0.46931    | -0.575147 | 0.56519 | 0.999883 |
| gene564 | gene564 | nupC        | gi 57650036 ref NC_002951.2 :586623-587838 | MVR | MR150 | OK     | 80.4354 | 103.205 | 0.359604   | -0.440871 | 0.65931 | 0.999883 |
| gene565 | gene565 | ctsR        | gi 57650036 ref NC_002951.2 :587995-588457 | MVR | MR150 | OK     | 194.883 | 458.55  | 1.23447    | -1.54174  | 0.12314 | 0.6962   |
| gene566 | gene566 | SACOL0568   | gi 57650036 ref NC_002951.2 :588475-590039 | MVR | MR150 | OK     | 194.884 | 419.09  | 1.10465    | -0.661383 | 0.50837 | 0.999883 |
| gene567 | gene567 | SACOL0569   | gi 57650036 ref NC_002951.2 :588475-590039 | MVR | MR150 | OK     | 191.769 | 415.618 | 1.11589    | -0.993736 | 0.32035 | 0.999883 |
| gene568 | gene568 | clpC        | gi 57650036 ref NC_002951.2 :590052-592508 | MVR | MR150 | OK     | 256.974 | 532.458 | 1.05104    | -1.07945  | 0.28039 | 0.965951 |
| gene569 | gene569 | radA        | gi 57650036 ref NC_002951.2 :592994-594359 | MVR | MR150 | OK     | 24.0396 | 32.7343 | 0.445388   | -0.61145  | 0.5409  | 0.999883 |
| gene57  | gene57  | SACOL0059   | gi 57650036 ref NC_002951.2 :70484-70937   | MVR | MR150 | OK     | 20.3118 | 19.327  | -0.0717003 | 0.103738  | 0.91738 | 0.999883 |
| gene570 | gene570 | SACOL0573   | gi 57650036 ref NC_002951.2 :594383-595457 | MVR | MR150 | OK     | 18.8511 | 29.0857 | 0.625661   | -0.893663 | 0.3715  | 0.999883 |
| gene571 | gene571 | gltX        | gi 57650036 ref NC_002951.2 :596013-597468 | MVR | MR150 | OK     | 54.3521 | 56.0155 | 0.0434918  | -0.055198 | 0.95598 | 0.999883 |
| gene572 | gene572 | cysE        | gi 57650036 ref NC_002951.2 :597896-600319 | MVR | MR150 | OK     | 23.4952 | 20.0865 | -0.226135  | 0.13536   | 0.89233 | 0.999883 |
| gene573 | gene573 | cysS        | gi 57650036 ref NC_002951.2 :597896-600319 | MVR | MR150 | OK     | 30.2114 | 23.3368 | -0.372485  | 0.410417  | 0.6815  | 0.999883 |
| gene574 | gene574 | SACOL0577   | gi 57650036 ref NC_002951.2 :597896-600319 | MVR | MR150 | OK     | 28.6024 | 20.7928 | -0.460052  | 0.196598  | 0.84414 | 0.999883 |
| gene575 | gene575 | SACOL0578   | gi 57650036 ref NC_002951.2 :600326-601597 | MVR | MR150 | OK     | 28.5073 | 22.9507 | -0.312789  | 0.310408  | 0.75625 | 0.999883 |
| gene576 | gene576 | SACOL0579   | gi 57650036 ref NC_002951.2 :600326-601597 | MVR | MR150 | OK     | 46.1661 | 40.0162 | -0.20625   | 0.202938  | 0.83918 | 0.999883 |
| gene577 | gene577 | SACOL0580   | gi 57650036 ref NC_002951.2 :601677-602247 | MVR | MR150 | OK     | 19.2526 | 19.8542 | 0.044396   | -0.065129 | 0.94807 | 0.999883 |
| gene578 | gene578 | secE        | gi 57650036 ref NC_002951.2 :602560-602743 | MVR | MR150 | OK     | 173.968 | 219.28  | 0.333952   | -0.474096 | 0.63543 | 0.999883 |

|         |         |           |                                            |     |       |        |         |         |              |              |         |          |
|---------|---------|-----------|--------------------------------------------|-----|-------|--------|---------|---------|--------------|--------------|---------|----------|
| gene579 | gene579 | nusG      | gi 57650036 ref NC_002951.2 :602755-603304 | MVR | MR150 | OK     | 179.742 | 224.06  | 0.317958     | -0.403914    | 0.68628 | 0.999883 |
| gene58  | gene58  | SACOL0061 | gi 57650036 ref NC_002951.2 :71151-72167   | MVR | MR150 | NOTEST | 0       | 0       | 0            | 0            | 1       | 1        |
| gene580 | gene580 | rplK      | gi 57650036 ref NC_002951.2 :603475-603907 | MVR | MR150 | OK     | 385.664 | 519.115 | 0.428708     | -0.520494    | 0.60272 | 0.999883 |
| gene581 | gene581 | rplA      | gi 57650036 ref NC_002951.2 :604114-604807 | MVR | MR150 | OK     | 710.546 | 761.397 | 0.0997203    | -0.105902    | 0.91566 | 0.999883 |
| gene582 | gene582 | rplJ      | gi 57650036 ref NC_002951.2 :605078-605579 | MVR | MR150 | OK     | 209.984 | 244.951 | 0.222216     | -0.283348    | 0.77691 | 0.999883 |
| gene583 | gene583 | rplL      | gi 57650036 ref NC_002951.2 :605621-605990 | MVR | MR150 | OK     | 742.908 | 913.795 | 0.298686     | -0.350485    | 0.72598 | 0.999883 |
| gene584 | gene584 | SACOL0587 | gi 57650036 ref NC_002951.2 :606164-606773 | MVR | MR150 | OK     | 47.2161 | 56.5095 | 0.259214     | -0.370742    | 0.71083 | 0.999883 |
| gene585 | gene585 | rpoB      | gi 57650036 ref NC_002951.2 :606987-610539 | MVR | MR150 | OK     | 180.174 | 189.244 | 0.0708583    | -0.07276     | 0.942   | 0.999883 |
| gene586 | gene586 | rpoC      | gi 57650036 ref NC_002951.2 :610675-614299 | MVR | MR150 | OK     | 181.193 | 192.692 | 0.0887673    | -0.091061    | 0.92744 | 0.999883 |
| gene587 | gene587 | SACOL0590 | gi 57650036 ref NC_002951.2 :614435-614690 | MVR | MR150 | OK     | 212.754 | 312.561 | 0.55495      | -0.800482    | 0.42343 | 0.999883 |
| gene588 | gene588 | rpsL      | gi 57650036 ref NC_002951.2 :614787-615201 | MVR | MR150 | OK     | 862.506 | 957.15  | 0.15021      | -0.169972    | 0.86503 | 0.999883 |
| gene589 | gene589 | rpsG      | gi 57650036 ref NC_002951.2 :615266-615737 | MVR | MR150 | OK     | 1143.11 | 1186.99 | 0.0543471    | -0.058573    | 0.95329 | 0.999883 |
| gene59  | gene59  | SACOL0062 | gi 57650036 ref NC_002951.2 :71151-72167   | MVR | MR150 | NOTEST | 0       | 0       | 0            | 0            | 1       | 1        |
| gene590 | gene590 | fusA      | gi 57650036 ref NC_002951.2 :615859-617941 | MVR | MR150 | OK     | 674.365 | 715.813 | 0.0860518    | -0.088355    | 0.9296  | 0.999883 |
| gene591 | gene591 | tuf       | gi 57650036 ref NC_002951.2 :618157-619342 | MVR | MR150 | OK     | 1348.92 | 1292.48 | -0.061654    | 0.063254     | 0.94956 | 0.999883 |
| gene592 | gene592 | SACOL0595 | gi 57650036 ref NC_002951.2 :619623-620799 | MVR | MR150 | OK     | 23.0978 | 20.3984 | -0.179301    | 0.256305     | 0.79772 | 0.999883 |
| gene593 | gene593 | SACOL0596 | gi 57650036 ref NC_002951.2 :620969-622157 | MVR | MR150 | OK     | 337.06  | 357.598 | 0.0853345    | -0.090977    | 0.92751 | 0.999883 |
| gene594 | gene594 | SACOL0597 | gi 57650036 ref NC_002951.2 :622422-623301 | MVR | MR150 | OK     | 179.082 | 195.965 | 0.129973     | -0.153525    | 0.87798 | 0.999883 |
| gene595 | gene595 | SACOL0598 | gi 57650036 ref NC_002951.2 :623460-625098 | MVR | MR150 | OK     | 10.5889 | 12.7814 | 0.271492     | -0.393132    | 0.69422 | 0.999883 |
| gene596 | gene596 | SACOL0599 | gi 57650036 ref NC_002951.2 :625311-626277 | MVR | MR150 | OK     | 84.563  | 100.153 | 0.244111     | -0.309304    | 0.75709 | 0.999883 |
| gene597 | gene597 | ilvE      | gi 57650036 ref NC_002951.2 :626611-627834 | MVR | MR150 | OK     | 104.139 | 121.009 | 0.216599     | -0.263435    | 0.79222 | 0.999883 |
| gene598 | gene598 | SACOL0601 | gi 57650036 ref NC_002951.2 :626611-627834 | MVR | MR150 | OK     | 17.1861 | 0       | -1.79769e+30 | -1.79769e+30 | 0.44883 | 0.999883 |
| gene599 | gene599 | SACOL0602 | gi 57650036 ref NC_002951.2 :627937-628621 | MVR | MR150 | OK     | 61.0053 | 73.0631 | 0.260207     | -0.358294    | 0.72012 | 0.999883 |
| gene6   | gene6   | SACOL0007 | gi 57650036 ref NC_002951.2 :9781-10483    | MVR | MR150 | OK     | 36.3265 | 29.5809 | -0.296358    | 0.429808     | 0.66734 | 0.999883 |
| gene60  | gene60  | SACOL0063 | gi 57650036 ref NC_002951.2 :72303-73371   | MVR | MR150 | NOTEST | 0       | 0       | 0            | 0            | 1       | 1        |
| gene600 | gene600 | SACOL0603 | gi 57650036 ref NC_002951.2 :628736-630009 | MVR | MR150 | OK     | 51.5364 | 50.9162 | -0.0174686   | 0.02241      | 0.98212 | 0.999883 |
| gene601 | gene601 | SACOL0604 | gi 57650036 ref NC_002951.2 :628736-630009 | MVR | MR150 | OK     | 9.79167 | 10.6194 | 0.117073     | -0.063762    | 0.94916 | 0.999883 |
| gene602 | gene602 | SACOL0605 | gi 57650036 ref NC_002951.2 :630075-630545 | MVR | MR150 | OK     | 20.8322 | 24.3481 | 0.224992     | -0.328155    | 0.74279 | 0.999883 |
| gene603 | gene603 | SACOL0606 | gi 57650036 ref NC_002951.2 :630692-631562 | MVR | MR150 | OK     | 14.3921 | 23.3105 | 0.695697     | -1.01662     | 0.30934 | 0.992496 |
| gene604 | gene604 | SACOL0607 | gi 57650036 ref NC_002951.2 :631582-632149 | MVR | MR150 | OK     | 53.1502 | 60.0488 | 0.17606      | -0.252278    | 0.80083 | 0.999883 |
| gene605 | gene605 | sdrC      | gi 57650036 ref NC_002951.2 :632578-635422 | MVR | MR150 | OK     | 8.17108 | 7.76339 | -0.0738389   | 0.105552     | 0.91594 | 0.999883 |
| gene606 | gene606 | sdrD      | gi 57650036 ref NC_002951.2 :635788-639934 | MVR | MR150 | OK     | 70.948  | 82.5732 | 0.218912     | -0.236021    | 0.81342 | 0.999883 |
| gene607 | gene607 | sdrE      | gi 57650036 ref NC_002951.2 :640327-643828 | MVR | MR150 | OK     | 9.94231 | 8.90997 | -0.158161    | 0.218249     | 0.82724 | 0.999883 |



|         |         |           |                                            |     |       |        |         |         |            |           |         |          |
|---------|---------|-----------|--------------------------------------------|-----|-------|--------|---------|---------|------------|-----------|---------|----------|
| gene608 | gene608 | SACOL0611 | gi 57650036 ref NC_002951.2 :643946-645419 | MVR | MR150 | OK     | 11.0978 | 9.62505 | -0.205403  | 0.300219  | 0.76401 | 0.999883 |
| gene609 | gene609 | SACOL0612 | gi 57650036 ref NC_002951.2 :645542-647033 | MVR | MR150 | OK     | 49.7153 | 52.0813 | 0.0670745  | -0.085643 | 0.93175 | 0.999883 |
| gene61  | gene61  | SACOL0064 | gi 57650036 ref NC_002951.2 :73401-74736   | MVR | MR150 | NOTEST | 0       | 0       | 0          | 0         | 1       | 1        |
| gene610 | gene610 | SACOL0613 | gi 57650036 ref NC_002951.2 :647314-648193 | MVR | MR150 | OK     | 147.658 | 195.514 | 0.405012   | -0.483902 | 0.62846 | 0.999883 |
| gene611 | gene611 | SACOL0614 | gi 57650036 ref NC_002951.2 :648205-648871 | MVR | MR150 | OK     | 44.0446 | 74.8975 | 0.765953   | -1.07092  | 0.2842  | 0.971099 |
| gene612 | gene612 | SACOL0615 | gi 57650036 ref NC_002951.2 :648884-649247 | MVR | MR150 | OK     | 153.269 | 243.013 | 0.664962   | -0.918217 | 0.35851 | 0.999883 |
| gene613 | gene613 | nagB      | gi 57650036 ref NC_002951.2 :649522-650281 | MVR | MR150 | OK     | 10.1637 | 13.4203 | 0.400988   | -0.586339 | 0.55765 | 0.999883 |
| gene614 | gene614 | SACOL0617 | gi 57650036 ref NC_002951.2 :650357-650990 | MVR | MR150 | OK     | 48.4518 | 47.017  | -0.0433666 | 0.062173  | 0.95043 | 0.999883 |
| gene615 | gene615 | SACOL0618 | gi 57650036 ref NC_002951.2 :650991-651540 | MVR | MR150 | OK     | 92.0281 | 90.3257 | -0.026937  | 0.037199  | 0.97033 | 0.999883 |
| gene616 | gene616 | SACOL0619 | gi 57650036 ref NC_002951.2 :651643-652300 | MVR | MR150 | OK     | 3.78035 | 2.67969 | -0.496453  | 0.626787  | 0.5308  | 0.999883 |
| gene617 | gene617 | proP      | gi 57650036 ref NC_002951.2 :652801-654202 | MVR | MR150 | OK     | 256.598 | 358.086 | 0.480797   | -0.510279 | 0.60986 | 0.999883 |
| gene618 | gene618 | SACOL0621 | gi 57650036 ref NC_002951.2 :654745-656122 | MVR | MR150 | OK     | 1.67389 | 1.6916  | 0.0151861  | -0.020198 | 0.98389 | 0.999883 |
| gene619 | gene619 | atoB      | gi 57650036 ref NC_002951.2 :656123-657603 | MVR | MR150 | OK     | 5.36289 | 3.42127 | -0.648479  | 0.870323  | 0.38412 | 0.999883 |
| gene62  | gene62  | SACOL0065 | gi 57650036 ref NC_002951.2 :74754-75948   | MVR | MR150 | NOTEST | 0       | 0       | 0          | 0         | 1       | 1        |
| gene620 | gene620 | SACOL0623 | gi 57650036 ref NC_002951.2 :656123-657603 | MVR | MR150 | OK     | 3.55501 | 3.63355 | 0.0315266  | -0.015658 | 0.98751 | 0.999883 |
| gene621 | gene621 | SACOL0624 | gi 57650036 ref NC_002951.2 :657605-657875 | MVR | MR150 | OK     | 4.94058 | 5.52788 | 0.162045   | -0.152095 | 0.87911 | 0.999883 |
| gene622 | gene622 | SACOL0625 | gi 57650036 ref NC_002951.2 :658075-658243 | MVR | MR150 | OK     | 483.067 | 540.158 | 0.161157   | -0.235466 | 0.81385 | 0.999883 |
| gene623 | gene623 | thiD1     | gi 57650036 ref NC_002951.2 :658749-659580 | MVR | MR150 | OK     | 74.1738 | 86.6262 | 0.223892   | -0.294221 | 0.76859 | 0.999883 |
| gene624 | gene624 | ung       | gi 57650036 ref NC_002951.2 :659763-660420 | MVR | MR150 | OK     | 64.941  | 64.6476 | -0.0065338 | 0.009082  | 0.99275 | 0.999883 |
| gene625 | gene625 | SACOL0628 | gi 57650036 ref NC_002951.2 :660420-660801 | MVR | MR150 | OK     | 44.1352 | 61.1097 | 0.469471   | -0.688947 | 0.49086 | 0.999883 |
| gene626 | gene626 | SACOL0629 | gi 57650036 ref NC_002951.2 :660933-661302 | MVR | MR150 | OK     | 59.3551 | 72.3532 | 0.285687   | -0.419158 | 0.6751  | 0.999883 |
| gene627 | gene627 | SACOL0630 | gi 57650036 ref NC_002951.2 :661422-662907 | MVR | MR150 | OK     | 24.8599 | 20.5007 | -0.278153  | 0.386658  | 0.69901 | 0.999883 |
| gene628 | gene628 | SACOL0631 | gi 57650036 ref NC_002951.2 :663048-663501 | MVR | MR150 | OK     | 12.6949 | 10.8714 | -0.223703  | 0.310959  | 0.75583 | 0.999883 |
| gene629 | gene629 | SACOL0632 | gi 57650036 ref NC_002951.2 :663513-664278 | MVR | MR150 | OK     | 15.1306 | 19.7813 | 0.386668   | -0.567919 | 0.57009 | 0.999883 |
| gene63  | gene63  | SACOL0066 | gi 57650036 ref NC_002951.2 :76214-76316   | MVR | MR150 | NOTEST | 0       | 0       | 0          | 0         | 1       | 1        |
| gene630 | gene630 | SACOL0633 | gi 57650036 ref NC_002951.2 :664826-665579 | MVR | MR150 | OK     | 169.326 | 202.379 | 0.25726    | -0.311957 | 0.75507 | 0.999883 |
| gene631 | gene631 | eutD      | gi 57650036 ref NC_002951.2 :665746-666733 | MVR | MR150 | OK     | 103.696 | 127.641 | 0.299734   | -0.368586 | 0.71244 | 0.999883 |
| gene632 | gene632 | SACOL0635 | gi 57650036 ref NC_002951.2 :666735-667572 | MVR | MR150 | OK     | 123.24  | 138.691 | 0.170403   | -0.211794 | 0.83227 | 0.999883 |
| gene633 | gene633 | mvk       | gi 57650036 ref NC_002951.2 :668158-669079 | MVR | MR150 | OK     | 12.5844 | 10.6188 | -0.245009  | 0.360154  | 0.71873 | 0.999883 |
| gene634 | gene634 | mvaD      | gi 57650036 ref NC_002951.2 :669083-670067 | MVR | MR150 | OK     | 12.8496 | 11.5238 | -0.157108  | 0.230991  | 0.81732 | 0.999883 |
| gene635 | gene635 | SACOL0638 | gi 57650036 ref NC_002951.2 :670079-671156 | MVR | MR150 | OK     | 14.6714 | 13.7947 | -0.0888927 | 0.13015   | 0.89645 | 0.999883 |
| gene636 | gene636 | SACOL0639 | gi 57650036 ref NC_002951.2 :671332-671674 | MVR | MR150 | OK     | 12.8859 | 17.8261 | 0.468202   | -0.624826 | 0.53209 | 0.999883 |
| gene637 | gene637 | SACOL0640 | gi 57650036 ref NC_002951.2 :671726-673476 | MVR | MR150 | OK     | 34.058  | 39.0041 | 0.195634   | -0.244855 | 0.80657 | 0.999883 |

|         |         |           |                                            |     |       |        |         |         |                               |           |         |          |
|---------|---------|-----------|--------------------------------------------|-----|-------|--------|---------|---------|-------------------------------|-----------|---------|----------|
| gene638 | gene638 | SACOL0641 | gi 57650036 ref NC_002951.2 :671726-673476 | MVR | MR150 | OK     | 20.3311 | 22.8134 | 0.166194                      | -0.072728 | 0.94202 | 0.999883 |
| gene639 | gene639 | SACOL0642 | gi 57650036 ref NC_002951.2 :673533-673635 | MVR | MR150 | NOTEST | 0       | 0       | 0                             | 0         | 1       | 1        |
| gene64  | gene64  | SACOL0067 | gi 57650036 ref NC_002951.2 :76614-77547   | MVR | MR150 | OK     | 17.485  | 19.0101 | 0.120643                      | -0.176289 | 0.86007 | 0.999883 |
| gene640 | gene640 | SACOL0643 | gi 57650036 ref NC_002951.2 :674100-675510 | MVR | MR150 | OK     | 12.5255 | 10.8855 | -0.202458                     | 0.29524   | 0.76781 | 0.999883 |
| gene641 | gene641 | SACOL0644 | gi 57650036 ref NC_002951.2 :675513-676140 | MVR | MR150 | OK     | 1.1604  | 1.07542 | -0.109723                     | 0.10754   | 0.91436 | 0.999883 |
| gene642 | gene642 | SACOL0645 | gi 57650036 ref NC_002951.2 :676265-676907 | MVR | MR150 | OK     | 2.93689 | 3.80951 | 0.375315                      | -0.474945 | 0.63483 | 0.999883 |
| gene643 | gene643 | SACOL0646 | gi 57650036 ref NC_002951.2 :676994-677612 | MVR | MR150 | OK     | 4.59912 | 6.22515 | 0.436753                      | -0.587603 | 0.5568  | 0.999883 |
| gene644 | gene644 | SACOL0647 | gi 57650036 ref NC_002951.2 :677686-678316 | MVR | MR150 | OK     | 2.73562 | 2.84781 | 0.0579799                     | -0.070757 | 0.94359 | 0.999883 |
| gene645 | gene645 | SACOL0648 | gi 57650036 ref NC_002951.2 :678511-679132 | MVR | MR150 | OK     | 3.3865  | 3.27221 | -0.0495329                    | 0.062215  | 0.95039 | 0.999883 |
| gene646 | gene646 | SACOL0649 | gi 57650036 ref NC_002951.2 :679262-679904 | MVR | MR150 | OK     | 2.65719 | 2.42424 | -0.132372                     | 0.159453  | 0.87331 | 0.999883 |
| gene647 | gene647 | SACOL0650 | gi 57650036 ref NC_002951.2 :679950-680580 | MVR | MR150 | OK     | 2.73562 | 1.77988 | -0.620092                     | 0.718584  | 0.4724  | 0.999883 |
| gene648 | gene648 | SACOL0651 | gi 57650036 ref NC_002951.2 :681032-681662 | MVR | MR150 | OK     | 1.4398  | 1.06793 | -0.431058                     | 0.434774  | 0.66373 | 0.999883 |
| gene649 | gene649 | SACOL0652 | gi 57650036 ref NC_002951.2 :681776-682427 | MVR | MR150 | OK     | 2.05362 | 1.01824 | -1.01209                      | 1.06598   | 0.28643 | 0.974912 |
| gene65  | gene65  | SACOL0068 | gi 57650036 ref NC_002951.2 :77909-78113   | MVR | MR150 | NOTEST | 0       | 0       | 0                             | 0         | 1       | 1        |
| gene650 | gene650 | SACOL0653 | gi 57650036 ref NC_002951.2 :682463-683099 | MVR | MR150 | OK     | 4.1147  | 5.6173  | 0.449089                      | -0.599107 | 0.5491  | 0.999883 |
| gene651 | gene651 | SACOL0654 | gi 57650036 ref NC_002951.2 :683333-683960 | MVR | MR150 | OK     | 2.17576 | 5.01864 | 1.20578                       | -1.49072  | 0.13604 | 0.732502 |
| gene652 | gene652 | SACOL0655 | gi 57650036 ref NC_002951.2 :684229-685168 | MVR | MR150 | OK     | 236.113 | 277.45  | 0.232752                      | -0.263197 | 0.7924  | 0.999883 |
| gene653 | gene653 | SACOL0656 | gi 57650036 ref NC_002951.2 :685378-685915 | MVR | MR150 | OK     | 677.886 | 705.601 | 0.0578107                     | -0.064128 | 0.94887 | 0.999883 |
| gene654 | gene654 | SACOL0657 | gi 57650036 ref NC_002951.2 :686083-686560 | MVR | MR150 | OK     | 31.0902 | 29.8088 | -0.0607235                    | 0.089269  | 0.92887 | 0.999883 |
| gene655 | gene655 | SACOL0658 | gi 57650036 ref NC_002951.2 :686599-687895 | MVR | MR150 | OK     | 44.5173 | 54.2178 | 0.284399                      | -0.370992 | 0.71064 | 0.999883 |
| gene656 | gene656 | SACOL0659 | gi 57650036 ref NC_002951.2 :687922-688444 | MVR | MR150 | OK     | 142.428 | 166.779 | 0.227702                      | -0.300354 | 0.76391 | 0.999883 |
| gene657 | gene657 | adhP      | gi 57650036 ref NC_002951.2 :688942-689953 | MVR | MR150 | OK     | 8.17357 | 5.09813 | -0.680998                     | 0.986767  | 0.32376 | 0.999883 |
| gene658 | gene658 | SACOL0661 | gi 57650036 ref NC_002951.2 :690027-690135 | MVR | MR150 | NOTEST | 0       | 0       | 0                             | 0         | 1       | 1        |
| gene659 | gene659 | SACOL0662 | gi 57650036 ref NC_002951.2 :690215-692302 | MVR | MR150 | OK     | 65.8382 | 55.9793 | -0.23403                      | 0.093298  | 0.92567 | 0.999883 |
| gene66  | gene66  | SACOL0069 | gi 57650036 ref NC_002951.2 :78161-78458   | MVR | MR150 | NOTEST | 0.64311 | 0       | -1.79769e+3(-1.79769e+0.22252 |           | 1       |          |
| gene660 | gene660 | argS      | gi 57650036 ref NC_002951.2 :690215-692302 | MVR | MR150 | OK     | 72.8042 | 71.4488 | -0.027111                     | 0.029962  | 0.9761  | 0.999883 |
| gene661 | gene661 | SACOL0664 | gi 57650036 ref NC_002951.2 :692690-693326 | MVR | MR150 | OK     | 9.93204 | 8.77703 | -0.178357                     | 0.255051  | 0.79868 | 0.999883 |
| gene662 | gene662 | SACOL0665 | gi 57650036 ref NC_002951.2 :693704-694592 | MVR | MR150 | OK     | 26.5953 | 25.5942 | -0.0553541                    | 0.079951  | 0.93628 | 0.999883 |
| gene663 | gene663 | SACOL0666 | gi 57650036 ref NC_002951.2 :694739-695690 | MVR | MR150 | OK     | 13.9153 | 18.1469 | 0.383048                      | -0.561004 | 0.5748  | 0.999883 |
| gene664 | gene664 | SACOL0667 | gi 57650036 ref NC_002951.2 :695744-697248 | MVR | MR150 | OK     | 22.6321 | 29.1465 | 0.364954                      | -0.325114 | 0.7451  | 0.999883 |
| gene665 | gene665 | SACOL0668 | gi 57650036 ref NC_002951.2 :695744-697248 | MVR | MR150 | OK     | 31.0087 | 30.3159 | -0.0326027                    | 0.034164  | 0.97275 | 0.999883 |
| gene666 | gene666 | SACOL0669 | gi 57650036 ref NC_002951.2 :697383-697890 | MVR | MR150 | OK     | 161.659 | 183.374 | 0.181835                      | -0.238352 | 0.81161 | 0.999883 |
| gene667 | gene667 | SACOL0670 | gi 57650036 ref NC_002951.2 :698051-698768 | MVR | MR150 | OK     | 33.9174 | 31.0922 | -0.125472                     | 0.181842  | 0.85571 | 0.999883 |

|         |         |           |                                            |     |       |        |         |         |            |           |         |          |
|---------|---------|-----------|--------------------------------------------|-----|-------|--------|---------|---------|------------|-----------|---------|----------|
| gene668 | gene668 | SACOL0671 | gi 57650036 ref NC_002951.2 :698936-699725 | MVR | MR150 | OK     | 76.5804 | 79.5422 | 0.0547468  | -0.072654 | 0.94208 | 0.999883 |
| gene669 | gene669 | sarA      | gi 57650036 ref NC_002951.2 :699975-700350 | MVR | MR150 | OK     | 886.334 | 546.26  | -0.698263  | 0.8322    | 0.4053  | 0.999883 |
| gene67  | gene67  | SACOL0070 | gi 57650036 ref NC_002951.2 :78529-80204   | MVR | MR150 | NOTEST | 0       | 0       | 0          | 0         | 1       | 1        |
| gene670 | gene670 | SACOL0673 | gi 57650036 ref NC_002951.2 :700497-700617 | MVR | MR150 | NOTEST | 0       | 0       | 0          | 0         | 1       | 1        |
| gene671 | gene671 | SACOL0675 | gi 57650036 ref NC_002951.2 :701297-702191 | MVR | MR150 | OK     | 13.7895 | 14.1206 | 0.0342321  | -0.050328 | 0.95986 | 0.999883 |
| gene672 | gene672 | SACOL0676 | gi 57650036 ref NC_002951.2 :702421-702646 | MVR | MR150 | OK     | 1.43588 | 3.18319 | 1.14854    | -0.517213 | 0.60501 | 0.999883 |
| gene673 | gene673 | SACOL0677 | gi 57650036 ref NC_002951.2 :702662-702866 | MVR | MR150 | OK     | 4.14336 | 4.59906 | 0.150538   | -0.084861 | 0.93237 | 0.999883 |
| gene674 | gene674 | SACOL0678 | gi 57650036 ref NC_002951.2 :703024-703585 | MVR | MR150 | OK     | 7.62842 | 3.81532 | -0.999579  | 1.31278   | 0.18926 | 0.848649 |
| gene675 | gene675 | SACOL0679 | gi 57650036 ref NC_002951.2 :703603-708245 | MVR | MR150 | OK     | 5.87864 | 5.97971 | 0.0245908  | -0.022296 | 0.98221 | 0.999883 |
| gene676 | gene676 | SACOL0680 | gi 57650036 ref NC_002951.2 :703603-708245 | MVR | MR150 | OK     | 7.73758 | 6.07603 | -0.348753  | 0.106266  | 0.91537 | 0.999883 |
| gene677 | gene677 | SACOL0681 | gi 57650036 ref NC_002951.2 :703603-708245 | MVR | MR150 | OK     | 8.57136 | 6.17392 | -0.473337  | 0.119227  | 0.9051  | 0.999883 |
| gene678 | gene678 | SACOL0682 | gi 57650036 ref NC_002951.2 :703603-708245 | MVR | MR150 | OK     | 11.0264 | 11.9268 | 0.113248   | -0.109359 | 0.91292 | 0.999883 |
| gene679 | gene679 | SACOL0684 | gi 57650036 ref NC_002951.2 :708245-709439 | MVR | MR150 | OK     | 4.27596 | 3.78264 | -0.176857  | 0.100178  | 0.9202  | 0.999883 |
| gene68  | gene68  | SACOL0071 | gi 57650036 ref NC_002951.2 :78529-80204   | MVR | MR150 | NOTEST | 0       | 0       | 0          | 0         | 1       | 1        |
| gene680 | gene680 | SACOL0685 | gi 57650036 ref NC_002951.2 :708245-709439 | MVR | MR150 | OK     | 18.3654 | 12.4242 | -0.563839  | 0.378515  | 0.70505 | 0.999883 |
| gene681 | gene681 | SACOL0686 | gi 57650036 ref NC_002951.2 :708245-709439 | MVR | MR150 | OK     | 17.895  | 22.4556 | 0.327524   | -0.379761 | 0.70412 | 0.999883 |
| gene682 | gene682 | SACOL0687 | gi 57650036 ref NC_002951.2 :709778-711821 | MVR | MR150 | OK     | 40.6759 | 58.8422 | 0.532677   | -0.654439 | 0.51283 | 0.999883 |
| gene683 | gene683 | SACOL0688 | gi 57650036 ref NC_002951.2 :712980-715480 | MVR | MR150 | OK     | 265.295 | 263.878 | -0.0077241 | 0.005363  | 0.99572 | 0.999883 |
| gene684 | gene684 | SACOL0689 | gi 57650036 ref NC_002951.2 :712980-715480 | MVR | MR150 | OK     | 156.435 | 155.036 | -0.012959  | 0.00644   | 0.99486 | 0.999883 |
| gene685 | gene685 | SACOL0690 | gi 57650036 ref NC_002951.2 :712980-715480 | MVR | MR150 | OK     | 264.117 | 274.675 | 0.0565526  | -0.0341   | 0.9728  | 0.999883 |
| gene686 | gene686 | sirR      | gi 57650036 ref NC_002951.2 :715601-716246 | MVR | MR150 | OK     | 166.212 | 196.072 | 0.238366   | -0.297798 | 0.76586 | 0.999883 |
| gene687 | gene687 | SACOL0692 | gi 57650036 ref NC_002951.2 :716325-717078 | MVR | MR150 | OK     | 11.0526 | 13.0121 | 0.235466   | -0.34468  | 0.73034 | 0.999883 |
| gene688 | gene688 | tagA      | gi 57650036 ref NC_002951.2 :717313-718078 | MVR | MR150 | OK     | 24.8574 | 28.1815 | 0.181076   | -0.263598 | 0.79209 | 0.999883 |
| gene689 | gene689 | SACOL0694 | gi 57650036 ref NC_002951.2 :718138-718933 | MVR | MR150 | OK     | 78.9505 | 89.5482 | 0.181717   | -0.239106 | 0.81102 | 0.999883 |
| gene69  | gene69  | SACOL0072 | gi 57650036 ref NC_002951.2 :80405-81266   | MVR | MR150 | NOTEST | 0       | 0       | 0          | 0         | 1       | 1        |
| gene690 | gene690 | SACOL0695 | gi 57650036 ref NC_002951.2 :719279-720092 | MVR | MR150 | OK     | 100.463 | 114.645 | 0.190502   | -0.243432 | 0.80767 | 0.999883 |
| gene691 | gene691 | tagB      | gi 57650036 ref NC_002951.2 :720190-722352 | MVR | MR150 | OK     | 34.8224 | 35.9134 | 0.0445071  | -0.041467 | 0.96692 | 0.999883 |
| gene692 | gene692 | tagX      | gi 57650036 ref NC_002951.2 :720190-722352 | MVR | MR150 | OK     | 33.8455 | 33.7541 | -0.0039009 | 0.003468  | 0.99723 | 0.999883 |
| gene693 | gene693 | tagD      | gi 57650036 ref NC_002951.2 :722414-722813 | MVR | MR150 | OK     | 53.4439 | 44.3294 | -0.269761  | 0.396662  | 0.69162 | 0.999883 |
| gene694 | gene694 | pbp4      | gi 57650036 ref NC_002951.2 :722929-724225 | MVR | MR150 | OK     | 19.6946 | 19.4234 | -0.0200028 | 0.028571  | 0.97721 | 0.999883 |
| gene695 | gene695 | abcA      | gi 57650036 ref NC_002951.2 :724645-726373 | MVR | MR150 | OK     | 47.1325 | 60.8455 | 0.368427   | -0.458159 | 0.64684 | 0.999883 |
| gene696 | gene696 | SACOL0701 | gi 57650036 ref NC_002951.2 :726731-727961 | MVR | MR150 | OK     | 75.9809 | 88.1715 | 0.214677   | -0.266192 | 0.79009 | 0.999883 |
| gene697 | gene697 | SACOL0702 | gi 57650036 ref NC_002951.2 :728215-728308 | MVR | MR150 | NOTEST | 0       | 0       | 0          | 0         | 1       | 1        |

|         |         |           |                                            |     |       |        |         |         |            |           |         |          |
|---------|---------|-----------|--------------------------------------------|-----|-------|--------|---------|---------|------------|-----------|---------|----------|
| gene698 | gene698 | SACOL0703 | gi 57650036 ref NC_002951.2 :728485-729319 | MVR | MR150 | OK     | 44.0938 | 39.848  | -0.14607   | 0.205023  | 0.83755 | 0.999883 |
| gene699 | gene699 | SACOL0704 | gi 57650036 ref NC_002951.2 :729600-730398 | MVR | MR150 | OK     | 40.6442 | 35.5885 | -0.191638  | 0.27265   | 0.78512 | 0.999883 |
| gene7   | gene7   | hutH      | gi 57650036 ref NC_002951.2 :10919-12434   | MVR | MR150 | OK     | 16.4903 | 37.6203 | 1.1899     | -1.62769  | 0.10359 | 0.645527 |
| gene70  | gene70  | SACOL0073 | gi 57650036 ref NC_002951.2 :81620-82154   | MVR | MR150 | NOTEST | 0       | 0       | 0          | 0         | 1       | 1        |
| gene700 | gene700 | SACOL0705 | gi 57650036 ref NC_002951.2 :730433-732451 | MVR | MR150 | OK     | 11.6057 | 11.794  | 0.0232175  | -0.014228 | 0.98865 | 0.999883 |
| gene701 | gene701 | SACOL0706 | gi 57650036 ref NC_002951.2 :730433-732451 | MVR | MR150 | OK     | 45.4995 | 40.1108 | -0.181861  | 0.21478   | 0.82994 | 0.999883 |
| gene702 | gene702 | SACOL0707 | gi 57650036 ref NC_002951.2 :732687-733653 | MVR | MR150 | OK     | 27.347  | 26.3877 | -0.051519  | 0.073823  | 0.94115 | 0.999883 |
| gene703 | gene703 | SACOL0708 | gi 57650036 ref NC_002951.2 :733694-734634 | MVR | MR150 | OK     | 39.8246 | 42.934  | 0.108461   | -0.14167  | 0.88734 | 0.999883 |
| gene704 | gene704 | SACOL0709 | gi 57650036 ref NC_002951.2 :733694-734634 | MVR | MR150 | OK     | 21.321  | 21.2521 | -0.0046684 | 0.002821  | 0.99775 | 0.999883 |
| gene705 | gene705 | SACOL0710 | gi 57650036 ref NC_002951.2 :734749-735247 | MVR | MR150 | OK     | 445.163 | 480.443 | 0.110032   | -0.12911  | 0.89727 | 0.999883 |
| gene706 | gene706 | SACOL0711 | gi 57650036 ref NC_002951.2 :735702-736770 | MVR | MR150 | OK     | 264.959 | 346.147 | 0.385614   | -0.421779 | 0.67319 | 0.999883 |
| gene707 | gene707 | SACOL0712 | gi 57650036 ref NC_002951.2 :736920-737964 | MVR | MR150 | OK     | 15.7608 | 31.5706 | 1.00224    | -1.43368  | 0.15166 | 0.757479 |
| gene708 | gene708 | SACOL0713 | gi 57650036 ref NC_002951.2 :738292-738721 | MVR | MR150 | OK     | 82.2271 | 115.957 | 0.495907   | -0.70579  | 0.48032 | 0.999883 |
| gene709 | gene709 | SACOL0714 | gi 57650036 ref NC_002951.2 :738929-739436 | MVR | MR150 | OK     | 136.09  | 173.906 | 0.353744   | -0.469045 | 0.63904 | 0.999883 |
| gene71  | gene71  | SACOL0074 | gi 57650036 ref NC_002951.2 :82253-82988   | MVR | MR150 | NOTEST | 0       | 0       | 0          | 0         | 1       | 1        |
| gene710 | gene710 | SACOL0715 | gi 57650036 ref NC_002951.2 :739548-740472 | MVR | MR150 | OK     | 29.9896 | 35.5316 | 0.244637   | -0.346705 | 0.72881 | 0.999883 |
| gene711 | gene711 | SACOL0716 | gi 57650036 ref NC_002951.2 :740478-742195 | MVR | MR150 | OK     | 21.9873 | 21.824  | -0.010755  | 0.006809  | 0.99457 | 0.999883 |
| gene712 | gene712 | SACOL0717 | gi 57650036 ref NC_002951.2 :740478-742195 | MVR | MR150 | OK     | 40.7992 | 43.7009 | 0.0991212  | -0.115492 | 0.90806 | 0.999883 |
| gene713 | gene713 | SACOL0718 | gi 57650036 ref NC_002951.2 :742338-744979 | MVR | MR150 | OK     | 257.675 | 292.036 | 0.180593   | -0.092485 | 0.92631 | 0.999883 |
| gene714 | gene714 | SACOL0720 | gi 57650036 ref NC_002951.2 :742338-744979 | MVR | MR150 | OK     | 251.228 | 294.92  | 0.231323   | -0.203653 | 0.83863 | 0.999883 |
| gene715 | gene715 | SACOL0721 | gi 57650036 ref NC_002951.2 :745703-746321 | MVR | MR150 | OK     | 55.1894 | 58.2235 | 0.0772103  | -0.109558 | 0.91276 | 0.999883 |
| gene716 | gene716 | SACOL0722 | gi 57650036 ref NC_002951.2 :746336-747344 | MVR | MR150 | OK     | 63.8485 | 71.2597 | 0.158433   | -0.206559 | 0.83635 | 0.999883 |
| gene717 | gene717 | SACOL0723 | gi 57650036 ref NC_002951.2 :747931-748729 | MVR | MR150 | OK     | 1781.93 | 1697.49 | -0.0700316 | 0.071571  | 0.94294 | 0.999883 |
| gene718 | gene718 | SACOL0724 | gi 57650036 ref NC_002951.2 :749089-749734 | MVR | MR150 | OK     | 29.1599 | 31.6468 | 0.118072   | -0.17252  | 0.86303 | 0.999883 |
| gene719 | gene719 | SACOL0725 | gi 57650036 ref NC_002951.2 :750430-752581 | MVR | MR150 | OK     | 6.19201 | 6.98745 | 0.174359   | -0.254998 | 0.79873 | 0.999883 |
| gene72  | gene72  | SACOL0075 | gi 57650036 ref NC_002951.2 :83421-84024   | MVR | MR150 | OK     | 15.2677 | 20.5093 | 0.425795   | -0.623678 | 0.53284 | 0.999883 |
| gene720 | gene720 | sarX      | gi 57650036 ref NC_002951.2 :752660-753086 | MVR | MR150 | OK     | 12.896  | 22.9539 | 0.83182    | -1.17665  | 0.23934 | 0.9107   |
| gene721 | gene721 | SACOL0727 | gi 57650036 ref NC_002951.2 :753275-754465 | MVR | MR150 | OK     | 47.1997 | 61.8883 | 0.390888   | -0.429386 | 0.66764 | 0.999883 |
| gene722 | gene722 | SACOL0728 | gi 57650036 ref NC_002951.2 :753275-754465 | MVR | MR150 | OK     | 50.7966 | 50.7799 | -0.0004743 | 0.000363  | 0.99971 | 0.999883 |
| gene723 | gene723 | SACOL0730 | gi 57650036 ref NC_002951.2 :754817-755462 | MVR | MR150 | OK     | 39.5742 | 40.5904 | 0.0365804  | -0.052874 | 0.95783 | 0.999883 |
| gene724 | gene724 | SACOL0731 | gi 57650036 ref NC_002951.2 :755577-756444 | MVR | MR150 | OK     | 32.0104 | 42.9279 | 0.423375   | -0.597259 | 0.55033 | 0.999883 |
| gene725 | gene725 | SACOL0733 | gi 57650036 ref NC_002951.2 :756782-758488 | MVR | MR150 | OK     | 24.4019 | 24.8996 | 0.0291275  | -0.031956 | 0.97451 | 0.999883 |
| gene726 | gene726 | SACOL0734 | gi 57650036 ref NC_002951.2 :756782-758488 | MVR | MR150 | OK     | 41.1457 | 51.3337 | 0.319162   | -0.250556 | 0.80216 | 0.999883 |

|         |         |           |                                            |     |       |        |         |         |              |              |         |          |
|---------|---------|-----------|--------------------------------------------|-----|-------|--------|---------|---------|--------------|--------------|---------|----------|
| gene727 | gene727 | SACOL0735 | gi 57650036 ref NC_002951.2 :758586-759276 | MVR | MR150 | OK     | 19.8225 | 17.4955 | -0.180155    | 0.264921     | 0.79107 | 0.999883 |
| gene728 | gene728 | SACOL0736 | gi 57650036 ref NC_002951.2 :759402-759846 | MVR | MR150 | OK     | 3.16779 | 0       | -1.79769e+30 | -1.79769e+30 | 0.01297 | 0.195191 |
| gene729 | gene729 | SACOL0737 | gi 57650036 ref NC_002951.2 :759912-760308 | MVR | MR150 | OK     | 37.6434 | 17.0633 | -1.1415      | 1.64155      | 0.10068 | 0.638047 |
| gene73  | gene73  | SACOL0076 | gi 57650036 ref NC_002951.2 :84290-87443   | MVR | MR150 | OK     | 10.6042 | 10.738  | 0.0180785    | -0.024913    | 0.98012 | 0.999883 |
| gene730 | gene730 | SACOL0738 | gi 57650036 ref NC_002951.2 :760445-760745 | MVR | MR150 | OK     | 84.6887 | 55.1378 | -0.619127    | 0.907203     | 0.3643  | 0.999883 |
| gene731 | gene731 | SACOL0739 | gi 57650036 ref NC_002951.2 :760824-761367 | MVR | MR150 | OK     | 8.97207 | 6.69194 | -0.423017    | 0.581341     | 0.56101 | 0.999883 |
| gene732 | gene732 | SACOL0740 | gi 57650036 ref NC_002951.2 :761462-762029 | MVR | MR150 | OK     | 14.1393 | 10.8421 | -0.383063    | 0.551303     | 0.58143 | 0.999883 |
| gene733 | gene733 | SACOL0741 | gi 57650036 ref NC_002951.2 :762030-762489 | MVR | MR150 | OK     | 8.66501 | 8.2614  | -0.0688163   | 0.092344     | 0.92643 | 0.999883 |
| gene734 | gene734 | SACOL0742 | gi 57650036 ref NC_002951.2 :762491-763175 | MVR | MR150 | OK     | 39.1451 | 18.6611 | -1.06879     | 1.55671      | 0.11954 | 0.68714  |
| gene735 | gene735 | uppP      | gi 57650036 ref NC_002951.2 :763346-764222 | MVR | MR150 | OK     | 25.5599 | 25.5952 | 0.0019924    | -0.002883    | 0.9977  | 0.999883 |
| gene736 | gene736 | SACOL0744 | gi 57650036 ref NC_002951.2 :764440-767742 | MVR | MR150 | OK     | 19.8973 | 18.9315 | -0.0717778   | 0.059834     | 0.95229 | 0.999883 |
| gene737 | gene737 | SACOL0745 | gi 57650036 ref NC_002951.2 :764440-767742 | MVR | MR150 | OK     | 27.7513 | 23.1722 | -0.260163    | 0.251678     | 0.80129 | 0.999883 |
| gene738 | gene738 | norR      | gi 57650036 ref NC_002951.2 :767868-768312 | MVR | MR150 | OK     | 762.646 | 740.567 | -0.0423829   | 0.048235     | 0.96153 | 0.999883 |
| gene739 | gene739 | SACOL0747 | gi 57650036 ref NC_002951.2 :768538-769465 | MVR | MR150 | OK     | 14.9724 | 12.8481 | -0.220751    | 0.32441      | 0.74563 | 0.999883 |
| gene74  | gene74  | SACOL0077 | gi 57650036 ref NC_002951.2 :87499-87982   | MVR | MR150 | OK     | 20.9297 | 29.7207 | 0.505917     | -0.740148    | 0.45921 | 0.999883 |
| gene740 | gene740 | SACOL0748 | gi 57650036 ref NC_002951.2 :769567-770476 | MVR | MR150 | OK     | 47.5484 | 46.2175 | -0.0409571   | 0.056203     | 0.95518 | 0.999883 |
| gene741 | gene741 | SACOL0749 | gi 57650036 ref NC_002951.2 :770510-770798 | MVR | MR150 | OK     | 74.3458 | 92.1493 | 0.309722     | -0.454287    | 0.64962 | 0.999883 |
| gene742 | gene742 | SACOL0750 | gi 57650036 ref NC_002951.2 :771080-772634 | MVR | MR150 | OK     | 21.7235 | 19.4562 | -0.159027    | 0.221997     | 0.82432 | 0.999883 |
| gene743 | gene743 | SACOL0751 | gi 57650036 ref NC_002951.2 :772719-774093 | MVR | MR150 | OK     | 26.6995 | 27.787  | 0.0575995    | -0.079303    | 0.93679 | 0.999883 |
| gene744 | gene744 | SACOL0752 | gi 57650036 ref NC_002951.2 :774528-775146 | MVR | MR150 | OK     | 52.3706 | 34.7876 | -0.590183    | 0.851965     | 0.39423 | 0.999883 |
| gene745 | gene745 | SACOL0753 | gi 57650036 ref NC_002951.2 :775331-775754 | MVR | MR150 | OK     | 95.3468 | 79.3473 | -0.265003    | 0.38183      | 0.70259 | 0.999883 |
| gene746 | gene746 | norA      | gi 57650036 ref NC_002951.2 :775962-777129 | MVR | MR150 | OK     | 22.0779 | 20.7465 | -0.0897304   | 0.128496     | 0.89776 | 0.999883 |
| gene747 | gene747 | SACOL0755 | gi 57650036 ref NC_002951.2 :777421-777874 | MVR | MR150 | OK     | 2110.65 | 1934.51 | -0.125718    | 0.130403     | 0.89625 | 0.999883 |
| gene748 | gene748 | SACOL0756 | gi 57650036 ref NC_002951.2 :778047-778530 | MVR | MR150 | OK     | 9.90222 | 7.56527 | -0.388361    | 0.528413     | 0.59721 | 0.999883 |
| gene749 | gene749 | SACOL0757 | gi 57650036 ref NC_002951.2 :778779-780461 | MVR | MR150 | OK     | 2.80996 | 1.08391 | -1.37431     | 1.10238      | 0.2703  | 0.953794 |
| gene75  | gene75  | plc       | gi 57650036 ref NC_002951.2 :88186-89173   | MVR | MR150 | NOTEST | 0.99634 | 0.7783  | -0.356312    | 0.385835     | 0.69962 | 1        |
| gene750 | gene750 | fruK      | gi 57650036 ref NC_002951.2 :778779-780461 | MVR | MR150 | OK     | 3.10415 | 1.91139 | -0.699575    | 0.766933     | 0.44312 | 0.999883 |
| gene751 | gene751 | SACOL0759 | gi 57650036 ref NC_002951.2 :780466-782424 | MVR | MR150 | OK     | 5.97036 | 6.70886 | 0.16825      | -0.246884    | 0.805   | 0.999883 |
| gene752 | gene752 | nagA      | gi 57650036 ref NC_002951.2 :782731-783913 | MVR | MR150 | OK     | 16.1771 | 14.6595 | -0.142117    | 0.206763     | 0.8362  | 0.999883 |
| gene753 | gene753 | SACOL0762 | gi 57650036 ref NC_002951.2 :784133-785483 | MVR | MR150 | OK     | 121.072 | 139.836 | 0.207873     | -0.240873    | 0.80965 | 0.999883 |
| gene754 | gene754 | SACOL0763 | gi 57650036 ref NC_002951.2 :785704-786544 | MVR | MR150 | OK     | 22.212  | 26.7949 | 0.270622     | -0.393179    | 0.69419 | 0.999883 |
| gene755 | gene755 | SACOL0764 | gi 57650036 ref NC_002951.2 :786675-787659 | MVR | MR150 | OK     | 45.0892 | 49.6111 | 0.137881     | -0.186995    | 0.85167 | 0.999883 |
| gene756 | gene756 | saeS      | gi 57650036 ref NC_002951.2 :787730-789920 | MVR | MR150 | OK     | 156.53  | 128.985 | -0.279237    | 0.21993      | 0.82593 | 0.999883 |

|         |         |             |                                            |     |       |        |         |         |             |             |         |          |
|---------|---------|-------------|--------------------------------------------|-----|-------|--------|---------|---------|-------------|-------------|---------|----------|
| gene757 | gene757 | saeR        | gi 57650036 ref NC_002951.2 :787730-789920 | MVR | MR150 | OK     | 203.045 | 146.484 | -0.471053   | 0.30678     | 0.75901 | 0.999883 |
| gene758 | gene758 | SACOL0767   | gi 57650036 ref NC_002951.2 :787730-789920 | MVR | MR150 | OK     | 149.128 | 109.93  | -0.439961   | 0.183503    | 0.8544  | 0.999883 |
| gene759 | gene759 | SACOL0768   | gi 57650036 ref NC_002951.2 :790261-790702 | MVR | MR150 | OK     | 364.354 | 257.284 | -0.501978   | 0.634897    | 0.5255  | 0.999883 |
| gene76  | gene76  | SACOL0079   | gi 57650036 ref NC_002951.2 :89393-90164   | MVR | MR150 | NOTEST | 0.53445 | 0.53626 | 0.00487306  | -0.004126   | 0.99671 | 1        |
| gene760 | gene760 | SACOL0769   | gi 57650036 ref NC_002951.2 :790981-791566 | MVR | MR150 | OK     | 49.5379 | 73.1468 | 0.562263    | -0.797052   | 0.42542 | 0.999883 |
| gene761 | gene761 | SACOL0770   | gi 57650036 ref NC_002951.2 :791664-792378 | MVR | MR150 | OK     | 23.5056 | 41.9959 | 0.837242    | -1.21064    | 0.22604 | 0.896337 |
| gene762 | gene762 | SACOL0771   | gi 57650036 ref NC_002951.2 :792381-792801 | MVR | MR150 | OK     | 14.1559 | 32.579  | 1.20254     | -1.71552    | 0.08625 | 0.588306 |
| gene763 | gene763 | SACOL0772   | gi 57650036 ref NC_002951.2 :792802-793471 | MVR | MR150 | OK     | 16.5533 | 32.9662 | 0.993873    | -1.4517     | 0.14658 | 0.743774 |
| gene764 | gene764 | pabA        | gi 57650036 ref NC_002951.2 :793821-796158 | MVR | MR150 | OK     | 5.68661 | 4.27314 | -0.412273   | 0.243819    | 0.80737 | 0.999883 |
| gene765 | gene765 | SACOL0774   | gi 57650036 ref NC_002951.2 :793821-796158 | MVR | MR150 | OK     | 6.20674 | 6.18559 | -0.0049256  | 0.006598    | 0.99474 | 0.999883 |
| gene766 | gene766 | SACOL0776   | gi 57650036 ref NC_002951.2 :796517-798216 | MVR | MR150 | OK     | 11.2849 | 10.4857 | -0.105979   | 0.082561    | 0.9342  | 0.999883 |
| gene767 | gene767 | SACOL0777   | gi 57650036 ref NC_002951.2 :796517-798216 | MVR | MR150 | OK     | 14.6757 | 18.2617 | 0.315398    | -0.380989   | 0.70321 | 0.999883 |
| gene768 | gene768 | SACOL0778   | gi 57650036 ref NC_002951.2 :798689-800630 | MVR | MR150 | OK     | 319.391 | 333.263 | 0.0613372   | -0.063189   | 0.94962 | 0.999883 |
| gene769 | gene769 | SACOL0779   | gi 57650036 ref NC_002951.2 :800906-802784 | MVR | MR150 | OK     | 36.9533 | 40.5288 | 0.133242    | -0.1703     | 0.86477 | 0.999883 |
| gene77  | gene77  | SACOL0080   | gi 57650036 ref NC_002951.2 :90215-90986   | MVR | MR150 | NOTEST | 0.32067 | 0.80439 | 1.3268      | -1.01383    | 0.31066 | 1        |
| gene770 | gene770 | recQ1       | gi 57650036 ref NC_002951.2 :802795-804577 | MVR | MR150 | OK     | 56.3484 | 55.0899 | -0.0325861  | 0.040175    | 0.96795 | 0.999883 |
| gene771 | gene771 | SACOL0781   | gi 57650036 ref NC_002951.2 :804798-807283 | MVR | MR150 | OK     | 23.577  | 24.0126 | 0.0264106   | -0.019595   | 0.98437 | 0.999883 |
| gene772 | gene772 | opuBB       | gi 57650036 ref NC_002951.2 :804798-807283 | MVR | MR150 | OK     | 30.7607 | 26.9049 | -0.193218   | 0.205755    | 0.83698 | 0.999883 |
| gene773 | gene773 | hisC        | gi 57650036 ref NC_002951.2 :807522-808581 | MVR | MR150 | OK     | 10.0851 | 9.27021 | -0.121546   | 0.178696    | 0.85818 | 0.999883 |
| gene774 | gene774 | SACOL0785   | gi 57650036 ref NC_002951.2 :808931-809474 | MVR | MR150 | OK     | 25.8176 | 35.2442 | 0.449031    | -0.658966   | 0.50992 | 0.999883 |
| gene775 | gene775 | SACOL0786   | gi 57650036 ref NC_002951.2 :809586-809748 | MVR | MR150 | OK     | 0       | 75.521  | 1.79769e+30 | 1.79769e+30 | 0.01149 | 0.182325 |
| gene776 | gene776 | SACOL0787   | gi 57650036 ref NC_002951.2 :810153-811071 | MVR | MR150 | OK     | 31.4284 | 30.9233 | -0.0233776  | 0.033297    | 0.97344 | 0.999883 |
| gene777 | gene777 | SACOL0788   | gi 57650036 ref NC_002951.2 :811340-812846 | MVR | MR150 | OK     | 146.443 | 152.691 | 0.0602711   | -0.067881   | 0.94588 | 0.999883 |
| gene778 | gene778 | SACOL0789   | gi 57650036 ref NC_002951.2 :813186-813687 | MVR | MR150 | OK     | 37.0683 | 39.1312 | 0.0781315   | -0.114651   | 0.90872 | 0.999883 |
| gene779 | gene779 | SACOL0790   | gi 57650036 ref NC_002951.2 :813706-814573 | MVR | MR150 | OK     | 28.3729 | 30.7612 | 0.116599    | -0.167524   | 0.86696 | 0.999883 |
| gene78  | gene78  | SACOL0081   | gi 57650036 ref NC_002951.2 :91049-91214   | MVR | MR150 | NOTEST | 0       | 0       | 0           | 0           | 1       | 1        |
| gene780 | gene780 | SACOL0790.1 | gi 57650036 ref NC_002951.2 :814957-815224 | MVR | MR150 | OK     | 303.103 | 358.806 | 0.243394    | -0.343005   | 0.7316  | 0.999883 |
| gene781 | gene781 | nrdI        | gi 57650036 ref NC_002951.2 :815373-817840 | MVR | MR150 | OK     | 629.523 | 727.613 | 0.208913    | -0.069807   | 0.94435 | 0.999883 |
| gene782 | gene782 | nrdE        | gi 57650036 ref NC_002951.2 :815373-817840 | MVR | MR150 | OK     | 531.103 | 605.703 | 0.189619    | -0.183714   | 0.85424 | 0.999883 |
| gene783 | gene783 | nrdF        | gi 57650036 ref NC_002951.2 :817957-818929 | MVR | MR150 | OK     | 929.536 | 1092.53 | 0.233094    | -0.238161   | 0.81176 | 0.999883 |
| gene784 | gene784 | SACOL0794   | gi 57650036 ref NC_002951.2 :819061-819166 | MVR | MR150 | NOTEST | 0       | 0       | 0           | 0           | 1       | 1        |
| gene785 | gene785 | SACOL0796   | gi 57650036 ref NC_002951.2 :819636-822309 | MVR | MR150 | OK     | 2.50169 | 1.58683 | -0.656757   | 0.63867     | 0.52304 | 0.999883 |
| gene786 | gene786 | SACOL0797   | gi 57650036 ref NC_002951.2 :819636-822309 | MVR | MR150 | OK     | 1.43599 | 1.21369 | -0.242641   | 0.189245    | 0.8499  | 0.999883 |

|         |         |           |                                            |     |       |        |         |         |             |             |         |          |
|---------|---------|-----------|--------------------------------------------|-----|-------|--------|---------|---------|-------------|-------------|---------|----------|
| gene787 | gene787 | SACOL0798 | gi 57650036 ref NC_002951.2 :819636-822309 | MVR | MR150 | OK     | 1.84752 | 0.54484 | -1.76168    | 0.984195    | 0.32502 | 0.999883 |
| gene788 | gene788 | SACOL0799 | gi 57650036 ref NC_002951.2 :822427-823456 | MVR | MR150 | OK     | 6.68327 | 2.95555 | -1.17713    | 1.65923     | 0.09707 | 0.627779 |
| gene789 | gene789 | SACOL0800 | gi 57650036 ref NC_002951.2 :823772-824087 | MVR | MR150 | OK     | 11.7047 | 10.0812 | -0.215429   | 0.265492    | 0.79063 | 0.999883 |
| gene79  | gene79  | SACOL0082 | gi 57650036 ref NC_002951.2 :91226-91823   | MVR | MR150 | NOTEST | 0.15669 | 0       | -1.79769e+3 | -1.79769e+3 | 0.22252 | 1        |
| gene790 | gene790 | murB      | gi 57650036 ref NC_002951.2 :824104-825028 | MVR | MR150 | OK     | 23.4738 | 23.4762 | 0.00014944  | -0.000216   | 0.99983 | 0.999883 |
| gene791 | gene791 | SACOL0802 | gi 57650036 ref NC_002951.2 :825154-825673 | MVR | MR150 | OK     | 14.6437 | 13.4291 | -0.124919   | 0.179644    | 0.85743 | 0.999883 |
| gene792 | gene792 | SACOL0803 | gi 57650036 ref NC_002951.2 :825792-826671 | MVR | MR150 | OK     | 16.7834 | 19.6191 | 0.225222    | -0.329781   | 0.74157 | 0.999883 |
| gene793 | gene793 | SACOL0804 | gi 57650036 ref NC_002951.2 :826824-827145 | MVR | MR150 | OK     | 70.8922 | 76.034  | 0.101016    | -0.148479   | 0.88197 | 0.999883 |
| gene794 | gene794 | SACOL0805 | gi 57650036 ref NC_002951.2 :827569-828694 | MVR | MR150 | OK     | 35.0495 | 43.7074 | 0.318484    | -0.432854   | 0.66512 | 0.999883 |
| gene795 | gene795 | pepT      | gi 57650036 ref NC_002951.2 :828882-830109 | MVR | MR150 | OK     | 94.2251 | 92.157  | -0.032017   | 0.0391      | 0.96881 | 0.999883 |
| gene796 | gene796 | SACOL0807 | gi 57650036 ref NC_002951.2 :830122-830617 | MVR | MR150 | OK     | 10.5459 | 17.6288 | 0.741249    | -1.05341    | 0.29215 | 0.976283 |
| gene797 | gene797 | SACOL0808 | gi 57650036 ref NC_002951.2 :830634-831396 | MVR | MR150 | OK     | 6.62935 | 8.7175  | 0.395047    | -0.566329   | 0.57117 | 0.999883 |
| gene798 | gene798 | SACOL0809 | gi 57650036 ref NC_002951.2 :831591-832662 | MVR | MR150 | OK     | 21.2653 | 25.3178 | 0.251651    | -0.360711   | 0.71832 | 0.999883 |
| gene799 | gene799 | SACOL0810 | gi 57650036 ref NC_002951.2 :832979-834035 | MVR | MR150 | OK     | 19.9617 | 17.7109 | -0.172597   | 0.250484    | 0.80221 | 0.999883 |
| gene8   | gene8   | serS      | gi 57650036 ref NC_002951.2 :12812-14099   | MVR | MR150 | OK     | 46.1596 | 42.2679 | -0.127066   | 0.167747    | 0.86678 | 0.999883 |
| gene80  | gene80  | SACOL0083 | gi 57650036 ref NC_002951.2 :91889-92657   | MVR | MR150 | NOTEST | 0.10748 | 0.26955 | 1.32647     | -0.597339   | 0.55028 | 1        |
| gene800 | gene800 | SACOL0811 | gi 57650036 ref NC_002951.2 :834204-834846 | MVR | MR150 | OK     | 69.6464 | 92.121  | 0.403481    | -0.550361   | 0.58207 | 0.999883 |
| gene801 | gene801 | SACOL0812 | gi 57650036 ref NC_002951.2 :834989-835856 | MVR | MR150 | OK     | 91.6662 | 103.303 | 0.172414    | -0.220625   | 0.82538 | 0.999883 |
| gene802 | gene802 | SACOL0813 | gi 57650036 ref NC_002951.2 :836219-837969 | MVR | MR150 | OK     | 3.8805  | 1.38744 | -1.48382    | 1.61608     | 0.10608 | 0.653986 |
| gene803 | gene803 | SACOL0814 | gi 57650036 ref NC_002951.2 :836219-837969 | MVR | MR150 | OK     | 1.68517 | 2.57823 | 0.613483    | -0.447056   | 0.65483 | 0.999883 |
| gene804 | gene804 | SACOL0815 | gi 57650036 ref NC_002951.2 :838029-838602 | MVR | MR150 | OK     | 816.584 | 949.863 | 0.218117    | -0.233939   | 0.81503 | 0.999883 |
| gene805 | gene805 | secA      | gi 57650036 ref NC_002951.2 :839015-841547 | MVR | MR150 | OK     | 120.252 | 140.765 | 0.227219    | -0.244919   | 0.80652 | 0.999883 |
| gene806 | gene806 | SACOL0817 | gi 57650036 ref NC_002951.2 :841588-841693 | MVR | MR150 | NOTEST | 0       | 0       | 0           | 0           | 1       | 1        |
| gene807 | gene807 | prfB      | gi 57650036 ref NC_002951.2 :841861-842972 | MVR | MR150 | OK     | 37.976  | 44.2107 | 0.219307    | -0.297139   | 0.76636 | 0.999883 |
| gene808 | gene808 | SACOL0819 | gi 57650036 ref NC_002951.2 :843125-843233 | MVR | MR150 | NOTEST | 0       | 0       | 0           | 0           | 1       | 1        |
| gene809 | gene809 | SACOL0820 | gi 57650036 ref NC_002951.2 :843380-844220 | MVR | MR150 | OK     | 5.7903  | 4.06708 | -0.509643   | 0.712381    | 0.47623 | 0.999883 |
| gene81  | gene81  | SACOL0084 | gi 57650036 ref NC_002951.2 :92789-94988   | MVR | MR150 | OK     | 13.8304 | 14.4057 | 0.0587942   | -0.081948   | 0.93469 | 0.999883 |
| gene810 | gene810 | SACOL0821 | gi 57650036 ref NC_002951.2 :844393-845277 | MVR | MR150 | OK     | 14.9229 | 17.3101 | 0.214084    | -0.297759   | 0.76589 | 0.999883 |
| gene811 | gene811 | SACOL0822 | gi 57650036 ref NC_002951.2 :844393-845277 | MVR | MR150 | OK     | 12.0852 | 18.7853 | 0.636358    | -0.292159   | 0.77017 | 0.999883 |
| gene812 | gene812 | uvrB      | gi 57650036 ref NC_002951.2 :845539-847531 | MVR | MR150 | OK     | 56.306  | 64.9612 | 0.20629     | -0.248005   | 0.80413 | 0.999883 |
| gene813 | gene813 | uvrA      | gi 57650036 ref NC_002951.2 :847538-850385 | MVR | MR150 | OK     | 65.8737 | 70.4279 | 0.0964462   | -0.109474   | 0.91283 | 0.999883 |
| gene814 | gene814 | hprK      | gi 57650036 ref NC_002951.2 :850991-851924 | MVR | MR150 | OK     | 68.5381 | 61.835  | -0.148482   | 0.196242    | 0.84442 | 0.999883 |
| gene815 | gene815 | lgt       | gi 57650036 ref NC_002951.2 :851929-852769 | MVR | MR150 | OK     | 35.5961 | 43.3025 | 0.28273     | -0.398607   | 0.69018 | 0.999883 |

|         |         |             |                                            |     |       |        |         |         |              |              |         |          |
|---------|---------|-------------|--------------------------------------------|-----|-------|--------|---------|---------|--------------|--------------|---------|----------|
| gene816 | gene816 | SACOL0827   | gi 57650036 ref NC_002951.2 :852776-853262 | MVR | MR150 | OK     | 30.9293 | 35.8274 | 0.212088     | -0.311706    | 0.75526 | 0.999883 |
| gene817 | gene817 | SACOL0828   | gi 57650036 ref NC_002951.2 :853269-854709 | MVR | MR150 | OK     | 31.9361 | 41.6242 | 0.382237     | -0.507603    | 0.61173 | 0.999883 |
| gene818 | gene818 | trxB        | gi 57650036 ref NC_002951.2 :854775-855711 | MVR | MR150 | OK     | 233.083 | 259.647 | 0.155712     | -0.176885    | 0.8596  | 0.999883 |
| gene819 | gene819 | SACOL0830   | gi 57650036 ref NC_002951.2 :856420-858324 | MVR | MR150 | OK     | 37.3119 | 38.7108 | 0.0530991    | -0.04463     | 0.9644  | 0.999883 |
| gene82  | gene82  | SACOL0085   | gi 57650036 ref NC_002951.2 :95138-96317   | MVR | MR150 | OK     | 4.40909 | 3.59789 | -0.293331    | 0.418493     | 0.67559 | 0.999883 |
| gene820 | gene820 | SACOL0831   | gi 57650036 ref NC_002951.2 :856420-858324 | MVR | MR150 | OK     | 41.8131 | 48.6712 | 0.219112     | -0.212454    | 0.83175 | 0.999883 |
| gene821 | gene821 | SACOL0832   | gi 57650036 ref NC_002951.2 :858433-859378 | MVR | MR150 | OK     | 53.8533 | 55.0844 | 0.032608     | -0.043811    | 0.96506 | 0.999883 |
| gene823 | gene823 | clpP        | gi 57650036 ref NC_002951.2 :859950-860538 | MVR | MR150 | OK     | 430.777 | 560.932 | 0.380884     | -0.431017    | 0.66646 | 0.999883 |
| gene824 | gene824 | SACOL0834   | gi 57650036 ref NC_002951.2 :860780-861683 | MVR | MR150 | OK     | 22.8216 | 19.3853 | -0.235439    | 0.342858     | 0.73171 | 0.999883 |
| gene825 | gene825 | SACOL0835   | gi 57650036 ref NC_002951.2 :862386-863016 | MVR | MR150 | OK     | 45.2098 | 26.6982 | -0.759895    | 1.10473      | 0.26928 | 0.952424 |
| gene826 | gene826 | SACOL0836   | gi 57650036 ref NC_002951.2 :863204-863351 | MVR | MR150 | NOTEST | 0       | 0       | 0            | 0            | 1       | 1        |
| gene827 | gene827 | gapR        | gi 57650036 ref NC_002951.2 :863775-864789 | MVR | MR150 | OK     | 66.6208 | 70.9228 | 0.0902769    | -0.117389    | 0.90655 | 0.999883 |
| gene828 | gene828 | gapA1       | gi 57650036 ref NC_002951.2 :864841-865852 | MVR | MR150 | OK     | 302.645 | 246.598 | -0.295462    | 0.328726     | 0.74236 | 0.999883 |
| gene829 | gene829 | pgk         | gi 57650036 ref NC_002951.2 :865990-867181 | MVR | MR150 | OK     | 68.7632 | 57.9512 | -0.246797    | 0.316916     | 0.75131 | 0.999883 |
| gene83  | gene83  | SACOL0086   | gi 57650036 ref NC_002951.2 :96318-97707   | MVR | MR150 | OK     | 3.2129  | 2.83383 | -0.181124    | 0.256884     | 0.79727 | 0.999883 |
| gene830 | gene830 | tpiA        | gi 57650036 ref NC_002951.2 :867302-868064 | MVR | MR150 | OK     | 87.9204 | 87.175  | -0.0122839   | 0.016195     | 0.98708 | 0.999883 |
| gene831 | gene831 | pgm         | gi 57650036 ref NC_002951.2 :868066-869584 | MVR | MR150 | OK     | 79.8196 | 69.0267 | -0.209589    | 0.255181     | 0.79858 | 0.999883 |
| gene832 | gene832 | eno         | gi 57650036 ref NC_002951.2 :869713-871018 | MVR | MR150 | OK     | 295.773 | 276.366 | -0.0979088   | 0.105188     | 0.91623 | 0.999883 |
| gene833 | gene833 | SACOL0843   | gi 57650036 ref NC_002951.2 :871357-871816 | MVR | MR150 | OK     | 33.1746 | 45.4377 | 0.453809     | -0.666046    | 0.50538 | 0.999883 |
| gene834 | gene834 | secG        | gi 57650036 ref NC_002951.2 :871882-872116 | MVR | MR150 | OK     | 1119.44 | 1372.25 | 0.293773     | -0.37636     | 0.70665 | 0.999883 |
| gene835 | gene835 | est         | gi 57650036 ref NC_002951.2 :872231-872972 | MVR | MR150 | OK     | 33.927  | 31.4118 | -0.111127    | 0.160667     | 0.87236 | 0.999883 |
| gene836 | gene836 | SACOL0846   | gi 57650036 ref NC_002951.2 :873005-875378 | MVR | MR150 | OK     | 64.4246 | 66.0503 | 0.0359541    | -0.041889    | 0.96659 | 0.999883 |
| gene837 | gene837 | smpB        | gi 57650036 ref NC_002951.2 :875399-875864 | MVR | MR150 | OK     | 93.4766 | 99.7936 | 0.0943417    | -0.13314     | 0.89408 | 0.999883 |
| gene838 | gene838 | SACOL_Satml | gi 57650036 ref NC_002951.2 :875954-876313 | MVR | MR150 | OK     | 162613  | 199870  | 0.297624     | -0.476281    | 0.63387 | 0.999883 |
| gene839 | gene839 | SACOL0848   | gi 57650036 ref NC_002951.2 :876637-876919 | MVR | MR150 | OK     | 10.2688 | 8.23173 | -0.318997    | 0.358207     | 0.72019 | 0.999883 |
| gene84  | gene84  | SACOL0087   | gi 57650036 ref NC_002951.2 :97874-97982   | MVR | MR150 | NOTEST | 0       | 0       | 0            | 0            | 1       | 1        |
| gene840 | gene840 | SACOL0849   | gi 57650036 ref NC_002951.2 :877185-877509 | MVR | MR150 | OK     | 37.0277 | 36.6343 | -0.0154081   | 0.022194     | 0.98229 | 0.999883 |
| gene841 | gene841 | SACOL0850   | gi 57650036 ref NC_002951.2 :877524-877671 | MVR | MR150 | NOTEST | 0       | 0       | 0            | 0            | 1       | 1        |
| gene842 | gene842 | SACOL0851   | gi 57650036 ref NC_002951.2 :877862-878591 | MVR | MR150 | OK     | 3.8206  | 1.73642 | -1.13768     | 1.4063       | 0.15964 | 0.779659 |
| gene843 | gene843 | SACOL0853   | gi 57650036 ref NC_002951.2 :879026-879182 | MVR | MR150 | NOTEST | 0       | 0       | 0            | 0            | 1       | 1        |
| gene844 | gene844 | SACOL0854   | gi 57650036 ref NC_002951.2 :879189-879711 | MVR | MR150 | OK     | 1.95912 | 0       | -1.79769e+30 | -1.79769e+30 | 0.01669 | 0.231165 |
| gene845 | gene845 | SACOL0855   | gi 57650036 ref NC_002951.2 :879849-880380 | MVR | MR150 | OK     | 3.0434  | 1.3868  | -1.13393     | 1.20137      | 0.22961 | 0.898537 |
| gene846 | gene846 | clfA        | gi 57650036 ref NC_002951.2 :880642-883444 | MVR | MR150 | OK     | 93.3653 | 94.6643 | 0.0199325    | -0.021938    | 0.9825  | 0.999883 |



|         |         |           |                                            |     |       |        |         |         |            |           |         |          |
|---------|---------|-----------|--------------------------------------------|-----|-------|--------|---------|---------|------------|-----------|---------|----------|
| gene847 | gene847 | SACOL0857 | gi 57650036 ref NC_002951.2 :883664-885191 | MVR | MR150 | OK     | 1.16703 | 0.80793 | -0.530541  | 0.656911  | 0.51124 | 0.999883 |
| gene848 | gene848 | empbp     | gi 57650036 ref NC_002951.2 :885541-886564 | MVR | MR150 | OK     | 3.73267 | 2.60495 | -0.518952  | 0.711349  | 0.47687 | 0.999883 |
| gene849 | gene849 | SACOL0859 | gi 57650036 ref NC_002951.2 :886898-887369 | MVR | MR150 | OK     | 1.41474 | 1.69247 | 0.258602   | -0.242723 | 0.80822 | 0.999883 |
| gene85  | gene85  | SACOL0088 | gi 57650036 ref NC_002951.2 :98199-99861   | MVR | MR150 | OK     | 76.18   | 92.7158 | 0.283403   | -0.335747 | 0.73706 | 0.999883 |
| gene850 | gene850 | nuc       | gi 57650036 ref NC_002951.2 :887709-888396 | MVR | MR150 | OK     | 8.33392 | 10.6877 | 0.358881   | -0.51679  | 0.6053  | 0.999883 |
| gene851 | gene851 | SACOL0861 | gi 57650036 ref NC_002951.2 :888752-888953 | MVR | MR150 | OK     | 18765.9 | 15928.5 | -0.236506  | 0.245061  | 0.80641 | 0.999883 |
| gene852 | gene852 | SACOL0862 | gi 57650036 ref NC_002951.2 :889448-889667 | MVR | MR150 | OK     | 26.8453 | 27.9931 | 0.060401   | -0.072845 | 0.94193 | 0.999883 |
| gene853 | gene853 | SACOL0863 | gi 57650036 ref NC_002951.2 :889728-890013 | MVR | MR150 | OK     | 5.70951 | 9.61861 | 0.752461   | -0.798303 | 0.4247  | 0.999883 |
| gene854 | gene854 | SACOL0864 | gi 57650036 ref NC_002951.2 :890100-890670 | MVR | MR150 | OK     | 6.5864  | 4.96355 | -0.408116  | 0.545591  | 0.58535 | 0.999883 |
| gene855 | gene855 | SACOL0865 | gi 57650036 ref NC_002951.2 :891074-891335 | MVR | MR150 | OK     | 28.9497 | 18.1772 | -0.671423  | 0.865421  | 0.38681 | 0.999883 |
| gene856 | gene856 | SACOL0866 | gi 57650036 ref NC_002951.2 :891639-891744 | MVR | MR150 | NOTEST | 0       | 0       | 0          | 0         | 1       | 1        |
| gene857 | gene857 | SACOL0868 | gi 57650036 ref NC_002951.2 :891875-892112 | MVR | MR150 | OK     | 39.8813 | 34.887  | -0.193023  | 0.256731  | 0.79739 | 0.999883 |
| gene858 | gene858 | SACOL0869 | gi 57650036 ref NC_002951.2 :892327-892918 | MVR | MR150 | OK     | 8.28096 | 6.26311 | -0.40292   | 0.557457  | 0.57722 | 0.999883 |
| gene859 | gene859 | SACOL0870 | gi 57650036 ref NC_002951.2 :892990-893608 | MVR | MR150 | OK     | 35.9028 | 37.3509 | 0.0570483  | -0.08301  | 0.93384 | 0.999883 |
| gene86  | gene86  | SACOL0089 | gi 57650036 ref NC_002951.2 :100186-101962 | MVR | MR150 | OK     | 4.86145 | 2.52687 | -0.944035  | 1.36835   | 0.1712  | 0.816303 |
| gene860 | gene860 | SACOL0871 | gi 57650036 ref NC_002951.2 :893762-894257 | MVR | MR150 | OK     | 14.2047 | 17.1103 | 0.268496   | -0.386369 | 0.69922 | 0.999883 |
| gene861 | gene861 | SACOL0872 | gi 57650036 ref NC_002951.2 :894655-895078 | MVR | MR150 | OK     | 15.988  | 12.9965 | -0.298864  | 0.418419  | 0.67564 | 0.999883 |
| gene862 | gene862 | aroD      | gi 57650036 ref NC_002951.2 :895225-895942 | MVR | MR150 | OK     | 8.42005 | 9.77184 | 0.214801   | -0.309889 | 0.75665 | 0.999883 |
| gene863 | gene863 | SACOL0874 | gi 57650036 ref NC_002951.2 :896024-896564 | MVR | MR150 | OK     | 33.2696 | 29.7038 | -0.163558  | 0.240285  | 0.81011 | 0.999883 |
| gene864 | gene864 | SACOL0875 | gi 57650036 ref NC_002951.2 :896713-897034 | MVR | MR150 | OK     | 118.864 | 160.516 | 0.433401   | -0.627066 | 0.53062 | 0.999883 |
| gene865 | gene865 | SACOL0876 | gi 57650036 ref NC_002951.2 :897177-897534 | MVR | MR150 | OK     | 75.1591 | 85.1516 | 0.180085   | -0.263685 | 0.79202 | 0.999883 |
| gene866 | gene866 | gcvH      | gi 57650036 ref NC_002951.2 :897691-898072 | MVR | MR150 | OK     | 546.626 | 621.98  | 0.186314   | -0.225884 | 0.82129 | 0.999883 |
| gene867 | gene867 | SACOL0879 | gi 57650036 ref NC_002951.2 :898250-899129 | MVR | MR150 | OK     | 65.0803 | 67.8774 | 0.0607116  | -0.080696 | 0.93568 | 0.999883 |
| gene868 | gene868 | SACOL0880 | gi 57650036 ref NC_002951.2 :899870-900546 | MVR | MR150 | OK     | 37.7792 | 39.7614 | 0.0737761  | -0.085751 | 0.93166 | 0.999883 |
| gene869 | gene869 | SACOL0881 | gi 57650036 ref NC_002951.2 :899870-900546 | MVR | MR150 | OK     | 35.3709 | 47.8012 | 0.434483   | -0.386083 | 0.69944 | 0.999883 |
| gene87  | gene87  | SACOL0090 | gi 57650036 ref NC_002951.2 :102135-103008 | MVR | MR150 | NOTEST | 0       | 0       | 0          | 0         | 1       | 1        |
| gene870 | gene870 | SACOL0882 | gi 57650036 ref NC_002951.2 :900795-902509 | MVR | MR150 | OK     | 11.302  | 10.7528 | -0.0718672 | 0.086211  | 0.9313  | 0.999883 |
| gene871 | gene871 | SACOL0883 | gi 57650036 ref NC_002951.2 :900795-902509 | MVR | MR150 | OK     | 8.91831 | 8.95068 | 0.00522631 | -0.004352 | 0.99653 | 0.999883 |
| gene872 | gene872 | SACOL0884 | gi 57650036 ref NC_002951.2 :902526-903348 | MVR | MR150 | OK     | 23.5647 | 24.3698 | 0.0484658  | -0.07057  | 0.94374 | 0.999883 |
| gene873 | gene873 | SACOL0885 | gi 57650036 ref NC_002951.2 :903490-904711 | MVR | MR150 | OK     | 2.58097 | 3.29994 | 0.354528   | -0.494102 | 0.62123 | 0.999883 |
| gene874 | gene874 | sek       | gi 57650036 ref NC_002951.2 :904799-905528 | MVR | MR150 | OK     | 18.061  | 25.4675 | 0.495781   | -0.726508 | 0.46753 | 0.999883 |
| gene875 | gene875 | sei       | gi 57650036 ref NC_002951.2 :905551-906280 | MVR | MR150 | OK     | 10.4198 | 15.3384 | 0.557818   | -0.815411 | 0.41484 | 0.999883 |
| gene876 | gene876 | SACOL0888 | gi 57650036 ref NC_002951.2 :906349-906781 | MVR | MR150 | OK     | 15.0476 | 25.0017 | 0.732494   | -1.04829  | 0.2945  | 0.977693 |

|         |         |           |                                            |     |       |        |         |         |                               |           |         |          |
|---------|---------|-----------|--------------------------------------------|-----|-------|--------|---------|---------|-------------------------------|-----------|---------|----------|
| gene877 | gene877 | SACOL0889 | gi 57650036 ref NC_002951.2 :906797-907256 | MVR | MR150 | OK     | 8.41744 | 12.9822 | 0.625081                      | -0.856857 | 0.39152 | 0.999883 |
| gene878 | gene878 | SACOL0890 | gi 57650036 ref NC_002951.2 :907267-907600 | MVR | MR150 | OK     | 15.169  | 17.7863 | 0.229638                      | -0.307947 | 0.75812 | 0.999883 |
| gene879 | gene879 | SACOL0891 | gi 57650036 ref NC_002951.2 :907792-908321 | MVR | MR150 | OK     | 6.13255 | 3.91478 | -0.647557                     | 0.525865  | 0.59898 | 0.999883 |
| gene88  | gene88  | SACOL0091 | gi 57650036 ref NC_002951.2 :103120-104518 | MVR | MR150 | NOTEST | 0       | 0       | 0                             | 0         | 1       | 1        |
| gene880 | gene880 | SACOL0892 | gi 57650036 ref NC_002951.2 :907792-908321 | MVR | MR150 | NOTEST | 0.79917 | 0       | -1.79769e+3(-1.79769e+0.27986 |           | 1       | 1        |
| gene881 | gene881 | SACOL0893 | gi 57650036 ref NC_002951.2 :908332-908681 | MVR | MR150 | NOTEST | 0       | 0       | 0                             | 0         | 1       | 1        |
| gene882 | gene882 | SACOL0894 | gi 57650036 ref NC_002951.2 :908332-908681 | MVR | MR150 | NOTEST | 0       | 0       | 0                             | 0         | 1       | 1        |
| gene883 | gene883 | SACOL0895 | gi 57650036 ref NC_002951.2 :908683-909004 | MVR | MR150 | NOTEST | 0       | 0       | 0                             | 0         | 1       | 1        |
| gene884 | gene884 | SACOL0896 | gi 57650036 ref NC_002951.2 :909067-909937 | MVR | MR150 | NOTEST | 0       | 0       | 0                             | 0         | 1       | 1        |
| gene885 | gene885 | SACOL0897 | gi 57650036 ref NC_002951.2 :909953-911411 | MVR | MR150 | NOTEST | 0       | 0       | 0                             | 0         | 1       | 1        |
| gene886 | gene886 | SACOL0898 | gi 57650036 ref NC_002951.2 :911711-912074 | MVR | MR150 | NOTEST | 0       | 0       | 0                             | 0         | 1       | 1        |
| gene887 | gene887 | SACOL0899 | gi 57650036 ref NC_002951.2 :912075-912998 | MVR | MR150 | NOTEST | 0       | 0       | 0                             | 0         | 1       | 1        |
| gene888 | gene888 | SACOL0900 | gi 57650036 ref NC_002951.2 :912075-912998 | MVR | MR150 | OK     | 2.09778 | 3.11687 | 0.571235                      | -0.681279 | 0.4957  | 0.999883 |
| gene889 | gene889 | SACOL0901 | gi 57650036 ref NC_002951.2 :913514-913856 | MVR | MR150 | OK     | 28.9932 | 54.527  | 0.911254                      | -1.31738  | 0.18771 | 0.844299 |
| gene89  | gene89  | SACOL0092 | gi 57650036 ref NC_002951.2 :104707-105181 | MVR | MR150 | OK     | 6.05831 | 3.90615 | -0.633169                     | 0.783985  | 0.43305 | 0.999883 |
| gene890 | gene890 | SACOL0902 | gi 57650036 ref NC_002951.2 :913867-914446 | MVR | MR150 | OK     | 31.6062 | 52.4968 | 0.732021                      | -1.06186  | 0.2883  | 0.975616 |
| gene891 | gene891 | SACOL0903 | gi 57650036 ref NC_002951.2 :914463-914682 | MVR | MR150 | OK     | 213.183 | 230.943 | 0.115442                      | -0.16966  | 0.86528 | 0.999883 |
| gene892 | gene892 | SACOL0904 | gi 57650036 ref NC_002951.2 :914732-915260 | MVR | MR150 | OK     | 11.7166 | 11.6621 | -0.0067294                    | 0.009575  | 0.99236 | 0.999883 |
| gene893 | gene893 | SACOL0905 | gi 57650036 ref NC_002951.2 :915262-916170 | MVR | MR150 | OK     | 11.5052 | 20.9719 | 0.866166                      | -0.668887 | 0.50357 | 0.999883 |
| gene894 | gene894 | SACOL0906 | gi 57650036 ref NC_002951.2 :915262-916170 | MVR | MR150 | OK     | 14.355  | 14.8907 | 0.0528576                     | -0.06495  | 0.94821 | 0.999883 |
| gene895 | gene895 | seb       | gi 57650036 ref NC_002951.2 :916477-917278 | MVR | MR150 | NOTEST | 0       | 0       | 0                             | 0         | 1       | 1        |
| gene896 | gene896 | SACOL0908 | gi 57650036 ref NC_002951.2 :917355-917913 | MVR | MR150 | NOTEST | 0       | 0       | 0                             | 0         | 1       | 1        |
| gene897 | gene897 | SACOL0909 | gi 57650036 ref NC_002951.2 :918285-918438 | MVR | MR150 | OK     | 167.732 | 68.366  | -1.29481                      | 1.38585   | 0.16579 | 0.799363 |
| gene898 | gene898 | SACOL0910 | gi 57650036 ref NC_002951.2 :918508-918806 | MVR | MR150 | NOTEST | 0       | 0       | 0                             | 0         | 1       | 1        |
| gene899 | gene899 | SACOL0911 | gi 57650036 ref NC_002951.2 :918508-918806 | MVR | MR150 | OK     | 88.0822 | 63.6356 | -0.469017                     | 0.623836  | 0.53274 | 0.999883 |
| gene9   | gene9   | SACOL0010 | gi 57650036 ref NC_002951.2 :14748-15770   | MVR | MR150 | OK     | 9.16604 | 10.8025 | 0.237                         | -0.305735 | 0.75981 | 0.999883 |
| gene90  | gene90  | SACOL0093 | gi 57650036 ref NC_002951.2 :105442-107035 | MVR | MR150 | OK     | 30.1192 | 41.1219 | 0.449222                      | -0.591419 | 0.55424 | 0.999883 |
| gene900 | gene900 | SACOL0912 | gi 57650036 ref NC_002951.2 :919636-919831 | MVR | MR150 | OK     | 2853.72 | 2511.29 | -0.184413                     | 0.234411  | 0.81467 | 0.999883 |
| gene901 | gene901 | SACOL0913 | gi 57650036 ref NC_002951.2 :920063-920915 | MVR | MR150 | OK     | 52.8864 | 57.3008 | 0.115659                      | -0.157449 | 0.87489 | 0.999883 |
| gene902 | gene902 | SACOL0914 | gi 57650036 ref NC_002951.2 :921242-922004 | MVR | MR150 | OK     | 180.188 | 184.702 | 0.0356971                     | -0.043282 | 0.96548 | 0.999883 |
| gene903 | gene903 | sufD      | gi 57650036 ref NC_002951.2 :922101-923409 | MVR | MR150 | OK     | 173.563 | 169.6   | -0.0333185                    | 0.037635  | 0.96998 | 0.999883 |
| gene904 | gene904 | SACOL0916 | gi 57650036 ref NC_002951.2 :923523-925219 | MVR | MR150 | OK     | 164.878 | 174.754 | 0.0839281                     | -0.08472  | 0.93248 | 0.999883 |
| gene905 | gene905 | SACOL0917 | gi 57650036 ref NC_002951.2 :923523-925219 | MVR | MR150 | OK     | 139.128 | 164.4   | 0.240796                      | -0.11375  | 0.90944 | 0.999883 |

|         |         |           |                                            |     |       |        |         |         |             |           |         |          |
|---------|---------|-----------|--------------------------------------------|-----|-------|--------|---------|---------|-------------|-----------|---------|----------|
| gene906 | gene906 | sufB      | gi 57650036 ref NC_002951.2 :925369-926767 | MVR | MR150 | OK     | 200.861 | 204.804 | 0.0280473   | -0.030906 | 0.97535 | 0.999883 |
| gene907 | gene907 | SACOL0919 | gi 57650036 ref NC_002951.2 :926953-927091 | MVR | MR150 | OK     | 0       | 54.4986 | 1.79769e+30 | 1.79769e+ | 0.10824 | 0.653986 |
| gene908 | gene908 | SACOL0920 | gi 57650036 ref NC_002951.2 :927096-927411 | MVR | MR150 | OK     | 2.78684 | 3.78043 | 0.439922    | -0.395559 | 0.69243 | 0.999883 |
| gene909 | gene909 | SACOL0921 | gi 57650036 ref NC_002951.2 :927775-928816 | MVR | MR150 | OK     | 13.1703 | 13.2924 | 0.0133113   | -0.019538 | 0.98441 | 0.999883 |
| gene91  | gene91  | spa       | gi 57650036 ref NC_002951.2 :107363-108890 | MVR | MR150 | OK     | 106.424 | 123.267 | 0.21196     | -0.24515  | 0.80634 | 0.999883 |
| gene910 | gene910 | SACOL0922 | gi 57650036 ref NC_002951.2 :928829-929897 | MVR | MR150 | OK     | 9.28466 | 11.1148 | 0.259562    | -0.381534 | 0.70281 | 0.999883 |
| gene911 | gene911 | SACOL0924 | gi 57650036 ref NC_002951.2 :930109-930958 | MVR | MR150 | OK     | 40.3229 | 48.3645 | 0.262349    | -0.365392 | 0.71482 | 0.999883 |
| gene912 | gene912 | SACOL0925 | gi 57650036 ref NC_002951.2 :930970-931798 | MVR | MR150 | OK     | 25.5573 | 32.9142 | 0.364975    | -0.526234 | 0.59873 | 0.999883 |
| gene913 | gene913 | SACOL0926 | gi 57650036 ref NC_002951.2 :931824-933144 | MVR | MR150 | OK     | 38.4201 | 42.6639 | 0.151155    | -0.200682 | 0.84095 | 0.999883 |
| gene914 | gene914 | lipA      | gi 57650036 ref NC_002951.2 :933227-934145 | MVR | MR150 | OK     | 268.448 | 320.536 | 0.255844    | -0.286158 | 0.77476 | 0.999883 |
| gene915 | gene915 | SACOL0928 | gi 57650036 ref NC_002951.2 :934265-934658 | MVR | MR150 | OK     | 172.988 | 196.018 | 0.180316    | -0.246524 | 0.80528 | 0.999883 |
| gene916 | gene916 | SACOL0929 | gi 57650036 ref NC_002951.2 :934736-934994 | MVR | MR150 | OK     | 160.813 | 143.909 | -0.160228   | 0.235393  | 0.8139  | 0.999883 |
| gene917 | gene917 | SACOL0930 | gi 57650036 ref NC_002951.2 :935100-936314 | MVR | MR150 | OK     | 101.145 | 126.685 | 0.324823    | -0.258381 | 0.79611 | 0.999883 |
| gene918 | gene918 | SACOL0931 | gi 57650036 ref NC_002951.2 :935100-936314 | MVR | MR150 | OK     | 65.4103 | 75.2323 | 0.201833    | -0.201137 | 0.84059 | 0.999883 |
| gene919 | gene919 | SACOL0932 | gi 57650036 ref NC_002951.2 :936346-937306 | MVR | MR150 | OK     | 77.6247 | 101.145 | 0.381838    | -0.486189 | 0.62683 | 0.999883 |
| gene92  | gene92  | sarS      | gi 57650036 ref NC_002951.2 :109310-110063 | MVR | MR150 | OK     | 109.863 | 108.803 | -0.0139837  | 0.018047  | 0.9856  | 0.999883 |
| gene920 | gene920 | SACOL0933 | gi 57650036 ref NC_002951.2 :937559-937670 | MVR | MR150 | NOTEST | 0       | 0       | 0           | 0         | 1       | 1        |
| gene921 | gene921 | SACOL0934 | gi 57650036 ref NC_002951.2 :937717-937870 | MVR | MR150 | OK     | 260.916 | 615.294 | 1.23769     | -1.68265  | 0.09244 | 0.611738 |
| gene922 | gene922 | dltA      | gi 57650036 ref NC_002951.2 :937885-940554 | MVR | MR150 | OK     | 528.408 | 642.095 | 0.281135    | -0.222412 | 0.82399 | 0.999883 |
| gene923 | gene923 | dltB      | gi 57650036 ref NC_002951.2 :937885-940554 | MVR | MR150 | OK     | 447.263 | 544.841 | 0.284713    | -0.186042 | 0.85241 | 0.999883 |
| gene924 | gene924 | dltC      | gi 57650036 ref NC_002951.2 :940571-941980 | MVR | MR150 | OK     | 502.746 | 684.322 | 0.444845    | -0.091908 | 0.92677 | 0.999883 |
| gene925 | gene925 | dltD      | gi 57650036 ref NC_002951.2 :940571-941980 | MVR | MR150 | OK     | 678.744 | 817.975 | 0.26919     | -0.269458 | 0.78758 | 0.999883 |
| gene926 | gene926 | SACOL0939 | gi 57650036 ref NC_002951.2 :942242-942464 | MVR | MR150 | OK     | 142.933 | 146.72  | 0.037723    | -0.055128 | 0.95604 | 0.999883 |
| gene927 | gene927 | SACOL0940 | gi 57650036 ref NC_002951.2 :942585-942909 | MVR | MR150 | OK     | 163.756 | 142.992 | -0.195615   | 0.281894  | 0.77803 | 0.999883 |
| gene928 | gene928 | SACOL0941 | gi 57650036 ref NC_002951.2 :942969-944032 | MVR | MR150 | OK     | 67.5406 | 90.853  | 0.42778     | -0.544249 | 0.58627 | 0.999883 |
| gene929 | gene929 | SACOL0942 | gi 57650036 ref NC_002951.2 :944348-944585 | MVR | MR150 | OK     | 334.761 | 491.102 | 0.552889    | -0.785748 | 0.43202 | 0.999883 |
| gene93  | gene93  | sirC      | gi 57650036 ref NC_002951.2 :110431-112422 | MVR | MR150 | OK     | 8.30008 | 10.7326 | 0.370807    | -0.5301   | 0.59604 | 0.999883 |
| gene930 | gene930 | SACOL0943 | gi 57650036 ref NC_002951.2 :944597-944957 | MVR | MR150 | OK     | 195.062 | 206.826 | 0.0844849   | -0.116686 | 0.90711 | 0.999883 |
| gene931 | gene931 | SACOL0944 | gi 57650036 ref NC_002951.2 :945410-946619 | MVR | MR150 | OK     | 110.671 | 105.791 | -0.0650581  | 0.078196  | 0.93767 | 0.999883 |
| gene932 | gene932 | SACOL0945 | gi 57650036 ref NC_002951.2 :946749-948225 | MVR | MR150 | OK     | 36.0164 | 42.3707 | 0.234415    | -0.308214 | 0.75792 | 0.999883 |
| gene933 | gene933 | SACOL0946 | gi 57650036 ref NC_002951.2 :948635-949952 | MVR | MR150 | OK     | 15.2497 | 7.81529 | -0.964408   | 1.40734   | 0.15933 | 0.779609 |
| gene934 | gene934 | SACOL0947 | gi 57650036 ref NC_002951.2 :949970-950345 | MVR | MR150 | OK     | 51.3003 | 44.9454 | -0.190792   | 0.28046   | 0.77912 | 0.999883 |
| gene935 | gene935 | SACOL0948 | gi 57650036 ref NC_002951.2 :950400-951555 | MVR | MR150 | OK     | 1.69602 | 0.48108 | -1.81781    | 2.00177   | 0.04531 | 0.41665  |

|         |         |           |                                            |     |       |        |         |         |              |             |         |          |
|---------|---------|-----------|--------------------------------------------|-----|-------|--------|---------|---------|--------------|-------------|---------|----------|
| gene936 | gene936 | mnhG      | gi 57650036 ref NC_002951.2 :951803-952910 | MVR | MR150 | OK     | 79.3346 | 108.114 | 0.446529     | -0.405301   | 0.68526 | 0.999883 |
| gene937 | gene937 | mnhF      | gi 57650036 ref NC_002951.2 :951803-952910 | MVR | MR150 | OK     | 15.1705 | 16.3319 | 0.106417     | -0.031799   | 0.97463 | 0.999883 |
| gene938 | gene938 | mnhE      | gi 57650036 ref NC_002951.2 :951803-952910 | MVR | MR150 | OK     | 58.2771 | 63.8977 | 0.132836     | -0.130842   | 0.8959  | 0.999883 |
| gene939 | gene939 | mnhD      | gi 57650036 ref NC_002951.2 :952911-957568 | MVR | MR150 | OK     | 65.8369 | 73.8047 | 0.164816     | -0.101537   | 0.91912 | 0.999883 |
| gene94  | gene94  | sirB      | gi 57650036 ref NC_002951.2 :110431-112422 | MVR | MR150 | NOTEST | 0.60599 | 0.38475 | -0.655358    | 0.203659    | 0.83862 | 1        |
| gene940 | gene940 | mnhC      | gi 57650036 ref NC_002951.2 :952911-957568 | MVR | MR150 | OK     | 49.2425 | 52.4298 | 0.0904832    | -0.015488   | 0.98764 | 0.999883 |
| gene941 | gene941 | mnhB      | gi 57650036 ref NC_002951.2 :952911-957568 | MVR | MR150 | OK     | 56.5134 | 45.3166 | -0.318554    | 0.068697    | 0.94523 | 0.999883 |
| gene942 | gene942 | mnhA      | gi 57650036 ref NC_002951.2 :952911-957568 | MVR | MR150 | OK     | 75.808  | 79.9913 | 0.0774934    | -0.065931   | 0.94743 | 0.999883 |
| gene943 | gene943 | kapB      | gi 57650036 ref NC_002951.2 :957698-958082 | MVR | MR150 | OK     | 39.4825 | 78.2898 | 0.987611     | -1.44235    | 0.1492  | 0.750812 |
| gene944 | gene944 | SACOL0957 | gi 57650036 ref NC_002951.2 :958145-958739 | MVR | MR150 | OK     | 125.421 | 178.306 | 0.507575     | -0.656457   | 0.51153 | 0.999883 |
| gene945 | gene945 | SACOL0958 | gi 57650036 ref NC_002951.2 :959154-959532 | MVR | MR150 | OK     | 217.864 | 201.574 | -0.112117    | 0.152534    | 0.87877 | 0.999883 |
| gene946 | gene946 | SACOL0959 | gi 57650036 ref NC_002951.2 :959893-961021 | MVR | MR150 | OK     | 62.1035 | 61.8838 | -0.0051132   | 0.006628    | 0.99471 | 0.999883 |
| gene947 | gene947 | rocD      | gi 57650036 ref NC_002951.2 :961328-962519 | MVR | MR150 | OK     | 388.388 | 411.84  | 0.0845851    | -0.089056   | 0.92904 | 0.999883 |
| gene948 | gene948 | gluD      | gi 57650036 ref NC_002951.2 :962627-963872 | MVR | MR150 | OK     | 695.207 | 775.856 | 0.158346     | -0.161861   | 0.87142 | 0.999883 |
| gene949 | gene949 | SACOL0962 | gi 57650036 ref NC_002951.2 :964374-965304 | MVR | MR150 | OK     | 31.0601 | 36.0787 | 0.216086     | -0.30541    | 0.76005 | 0.999883 |
| gene95  | gene95  | sirA      | gi 57650036 ref NC_002951.2 :112437-113430 | MVR | MR150 | OK     | 6.0835  | 5.6     | -0.119475    | 0.17239     | 0.86313 | 0.999883 |
| gene950 | gene950 | argH      | gi 57650036 ref NC_002951.2 :965545-968120 | MVR | MR150 | OK     | 78.5698 | 110.324 | 0.489694     | -0.448682   | 0.65366 | 0.999883 |
| gene951 | gene951 | argG      | gi 57650036 ref NC_002951.2 :965545-968120 | MVR | MR150 | OK     | 50.5019 | 72.7674 | 0.526954     | -0.359513   | 0.71921 | 0.999883 |
| gene952 | gene952 | SACOL0965 | gi 57650036 ref NC_002951.2 :968264-968399 | MVR | MR150 | NOTEST | 0       | 0       | 0            | 0           | 1       | 1        |
| gene953 | gene953 | pgi       | gi 57650036 ref NC_002951.2 :968470-969802 | MVR | MR150 | OK     | 101.608 | 103.094 | 0.0209462    | -0.024994   | 0.98006 | 0.999883 |
| gene954 | gene954 | SACOL0967 | gi 57650036 ref NC_002951.2 :970126-970702 | MVR | MR150 | OK     | 39.8433 | 43.5532 | 0.128439     | -0.186722   | 0.85188 | 0.999883 |
| gene955 | gene955 | spsA      | gi 57650036 ref NC_002951.2 :970706-971231 | MVR | MR150 | OK     | 56.2528 | 56.9642 | 0.0181309    | -0.026179   | 0.97912 | 0.999883 |
| gene956 | gene956 | spsB      | gi 57650036 ref NC_002951.2 :971237-971822 | MVR | MR150 | OK     | 86.2865 | 89.8433 | 0.0582757    | -0.07992    | 0.9363  | 0.999883 |
| gene957 | gene957 | rexB      | gi 57650036 ref NC_002951.2 :971981-975458 | MVR | MR150 | OK     | 35.0099 | 42.6323 | 0.284186     | -0.335331   | 0.73738 | 0.999883 |
| gene958 | gene958 | rexA      | gi 57650036 ref NC_002951.2 :975458-979112 | MVR | MR150 | OK     | 31.2422 | 35.658  | 0.190728     | -0.227529   | 0.82001 | 0.999883 |
| gene959 | gene959 | SACOL0973 | gi 57650036 ref NC_002951.2 :979277-980180 | MVR | MR150 | OK     | 258.185 | 252.88  | -0.0299559   | 0.03406     | 0.97283 | 0.999883 |
| gene96  | gene96  | SACOL0100 | gi 57650036 ref NC_002951.2 :113693-114641 | MVR | MR150 | NOTEST | 0.72692 | 0       | -1.79769e+3l | -1.79769e+0 | 0.01923 | 1        |
| gene960 | gene960 | SACOL0974 | gi 57650036 ref NC_002951.2 :980508-980898 | MVR | MR150 | OK     | 40.6022 | 43.1551 | 0.087972     | -0.129187   | 0.89721 | 0.999883 |
| gene961 | gene961 | SACOL0975 | gi 57650036 ref NC_002951.2 :981068-982385 | MVR | MR150 | OK     | 76.9975 | 99.8163 | 0.374464     | -0.455871   | 0.64848 | 0.999883 |
| gene962 | gene962 | SACOL0976 | gi 57650036 ref NC_002951.2 :982436-983261 | MVR | MR150 | OK     | 73.4546 | 91.132  | 0.311103     | -0.408309   | 0.68305 | 0.999883 |
| gene963 | gene963 | SACOL0977 | gi 57650036 ref NC_002951.2 :983374-983683 | MVR | MR150 | OK     | 294.175 | 334.729 | 0.186318     | -0.254628   | 0.79901 | 0.999883 |
| gene964 | gene964 | SACOL0978 | gi 57650036 ref NC_002951.2 :984229-986044 | MVR | MR150 | OK     | 2.86744 | 2.84523 | -0.0112185   | 0.016192    | 0.98708 | 0.999883 |
| gene965 | gene965 | clpB      | gi 57650036 ref NC_002951.2 :986246-988856 | MVR | MR150 | OK     | 262.747 | 555.008 | 1.07883      | -1.10835    | 0.26771 | 0.951188 |

|         |         |           |                                              |     |       |        |         |         |                               |           |         |          |
|---------|---------|-----------|----------------------------------------------|-----|-------|--------|---------|---------|-------------------------------|-----------|---------|----------|
| gene966 | gene966 | SACOL0980 | gi 57650036 ref NC_002951.2 :988914-989784   | MVR | MR150 | OK     | 0.5431  | 1.59974 | 1.55855                       | -1.59149  | 0.1115  | 0.663582 |
| gene967 | gene967 | SACOL0981 | gi 57650036 ref NC_002951.2 :989893-993274   | MVR | MR150 | NOTEST | 0.31714 | 0.48565 | 0.614796                      | -0.271935 | 0.78567 | 1        |
| gene968 | gene968 | SACOL0982 | gi 57650036 ref NC_002951.2 :989893-993274   | MVR | MR150 | OK     | 1.11882 | 0.34632 | -1.6918                       | 0.619598  | 0.53552 | 0.999883 |
| gene969 | gene969 | SACOL0983 | gi 57650036 ref NC_002951.2 :989893-993274   | MVR | MR150 | OK     | 1.96024 | 1.66639 | -0.234308                     | 0.228132  | 0.81954 | 0.999883 |
| gene97  | gene97  | SACOL0101 | gi 57650036 ref NC_002951.2 :114649-115648   | MVR | MR150 | OK     | 1.13183 | 0.19165 | -2.56208                      | 1.94182   | 0.05216 | 0.449909 |
| gene970 | gene970 | SACOL0984 | gi 57650036 ref NC_002951.2 :989893-993274   | MVR | MR150 | OK     | 5.19747 | 2.42075 | -1.10236                      | 0.857985  | 0.3909  | 0.999883 |
| gene971 | gene971 | SACOL0985 | gi 57650036 ref NC_002951.2 :993584-994019   | MVR | MR150 | OK     | 87.952  | 72.7626 | -0.273519                     | 0.394715  | 0.69305 | 0.999883 |
| gene972 | gene972 | SACOL0986 | gi 57650036 ref NC_002951.2 :994275-994461   | MVR | MR150 | OK     | 3030.97 | 3337.23 | 0.138867                      | -0.177338 | 0.85924 | 0.999883 |
| gene973 | gene973 | fabH      | gi 57650036 ref NC_002951.2 :994755-995697   | MVR | MR150 | OK     | 82.0133 | 68.5146 | -0.259445                     | 0.33758   | 0.73568 | 0.999883 |
| gene974 | gene974 | fabF      | gi 57650036 ref NC_002951.2 :995708-996953   | MVR | MR150 | OK     | 172.298 | 165.899 | -0.0546025                    | 0.062155  | 0.95044 | 0.999883 |
| gene975 | gene975 | SACOL0989 | gi 57650036 ref NC_002951.2 :997007-997379   | MVR | MR150 | OK     | 25.5334 | 14.0572 | -0.861082                     | 1.20346   | 0.2288  | 0.898537 |
| gene976 | gene976 | SACOL0990 | gi 57650036 ref NC_002951.2 :997601-999618   | MVR | MR150 | NOTEST | 0       | 0       | 0                             | 0         | 1       | 1        |
| gene977 | gene977 | oppB      | gi 57650036 ref NC_002951.2 :997601-999618   | MVR | MR150 | OK     | 373.104 | 353.415 | -0.0782146                    | 0.056787  | 0.95472 | 0.999883 |
| gene978 | gene978 | oppC      | gi 57650036 ref NC_002951.2 :997601-999618   | MVR | MR150 | OK     | 286.046 | 278.496 | -0.0385906                    | 0.028684  | 0.97712 | 0.999883 |
| gene979 | gene979 | oppD      | gi 57650036 ref NC_002951.2 :999634-1001648  | MVR | MR150 | OK     | 451.023 | 394.379 | -0.193618                     | 0.162186  | 0.87116 | 0.999883 |
| gene98  | gene98  | SACOL0102 | gi 57650036 ref NC_002951.2 :115668-124110   | MVR | MR150 | NOTEST | 0.61124 | 0.2955  | -1.04859                      | 0.407123  | 0.68392 | 1        |
| gene980 | gene980 | oppF      | gi 57650036 ref NC_002951.2 :999634-1001648  | MVR | MR150 | OK     | 272.835 | 245.58  | -0.151836                     | 0.091216  | 0.92732 | 0.999883 |
| gene981 | gene981 | SACOL0995 | gi 57650036 ref NC_002951.2 :1001665-1003321 | MVR | MR150 | OK     | 452.746 | 405.738 | -0.158152                     | 0.162381  | 0.87101 | 0.999883 |
| gene982 | gene982 | SACOL0996 | gi 57650036 ref NC_002951.2 :1003532-1005248 | MVR | MR150 | OK     | 1.45043 | 0.70723 | -1.03623                      | 1.31349   | 0.18902 | 0.84858  |
| gene983 | gene983 | SACOL0997 | gi 57650036 ref NC_002951.2 :1005298-1006285 | MVR | MR150 | OK     | 1.14962 | 0.7783  | -0.562763                     | 0.618777  | 0.53606 | 0.999883 |
| gene984 | gene984 | SACOL0998 | gi 57650036 ref NC_002951.2 :1006287-1008223 | MVR | MR150 | OK     | 1.08148 | 0.39214 | -1.46358                      | 0.732546  | 0.46384 | 0.999883 |
| gene985 | gene985 | SACOL0999 | gi 57650036 ref NC_002951.2 :1006287-1008223 | MVR | MR150 | OK     | 3.63996 | 4.01385 | 0.141061                      | -0.181614 | 0.85589 | 0.999883 |
| gene986 | gene986 | SACOL1000 | gi 57650036 ref NC_002951.2 :1008234-1009116 | MVR | MR150 | OK     | 5.68746 | 5.38836 | -0.0779373                    | 0.110927  | 0.91167 | 0.999883 |
| gene987 | gene987 | trpS      | gi 57650036 ref NC_002951.2 :1009157-1010147 | MVR | MR150 | OK     | 79.8532 | 85.8696 | 0.104796                      | -0.133954 | 0.89344 | 0.999883 |
| gene988 | gene988 | spxA      | gi 57650036 ref NC_002951.2 :1010441-1010837 | MVR | MR150 | OK     | 10827.3 | 9014.06 | -0.264427                     | 0.275711  | 0.78277 | 0.999883 |
| gene989 | gene989 | SACOL1003 | gi 57650036 ref NC_002951.2 :1011207-1011927 | MVR | MR150 | OK     | 28.8795 | 25.6136 | -0.173134                     | 0.252606  | 0.80057 | 0.999883 |
| gene99  | gene99  | SACOL0103 | gi 57650036 ref NC_002951.2 :115668-124110   | MVR | MR150 | OK     | 1.86829 | 0.14489 | -3.68868                      | 1.0857    | 0.27761 | 0.963271 |
| gene990 | gene990 | SACOL1004 | gi 57650036 ref NC_002951.2 :1012047-1013034 | MVR | MR150 | NOTEST | 0.9197  | 0       | -1.79769e+3(-1.79769e+0.01297 |           | 1       |          |
| gene991 | gene991 | pepF      | gi 57650036 ref NC_002951.2 :1013081-1014890 | MVR | MR150 | OK     | 36.2739 | 36.9355 | 0.0260769                     | -0.033699 | 0.97312 | 0.999883 |
| gene992 | gene992 | SACOL1006 | gi 57650036 ref NC_002951.2 :1015349-1016156 | MVR | MR150 | OK     | 80.1344 | 96.3551 | 0.26594                       | -0.347564 | 0.72817 | 0.999883 |
| gene993 | gene993 | SACOL1007 | gi 57650036 ref NC_002951.2 :1016178-1016544 | MVR | MR150 | OK     | 100.725 | 109.006 | 0.113989                      | -0.165072 | 0.86889 | 0.999883 |
| gene994 | gene994 | SACOL1008 | gi 57650036 ref NC_002951.2 :1016647-1017241 | MVR | MR150 | OK     | 15.7961 | 16.3156 | 0.0466814                     | -0.068245 | 0.94559 | 0.999883 |
| gene995 | gene995 | SACOL1009 | gi 57650036 ref NC_002951.2 :1017426-1017774 | MVR | MR150 | OK     | 43.7902 | 44.4412 | 0.0212897                     | -0.031137 | 0.97516 | 0.999883 |

|          |          |           |                                              |     |        |        |         |         |             |             |         |           |
|----------|----------|-----------|----------------------------------------------|-----|--------|--------|---------|---------|-------------|-------------|---------|-----------|
| gene996  | gene996  | relA1     | gi 57650036 ref NC_002951.2 :1017790-1018426 | MVR | MR150  | OK     | 33.4852 | 30.8951 | -0.116142   | 0.169534    | 0.86538 | 0.999883  |
| gene997  | gene997  | ppnK      | gi 57650036 ref NC_002951.2 :1018442-1020103 | MVR | MR150  | OK     | 58.3714 | 65.7617 | 0.171986    | -0.197354   | 0.84355 | 0.999883  |
| gene998  | gene998  | SACOL1012 | gi 57650036 ref NC_002951.2 :1018442-1020103 | MVR | MR150  | OK     | 17.3288 | 19.1687 | 0.14558     | -0.093941   | 0.92516 | 0.999883  |
| gene999  | gene999  | mgtE      | gi 57650036 ref NC_002951.2 :1020123-1021509 | MVR | MR150  | OK     | 21.9947 | 21.824  | -0.0112408  | 0.015798    | 0.9874  | 0.999883  |
|          | -        | -         | gi 57650036 ref NC_002951.2 :2227979-2228055 | MVR | M36C05 | OK     | 0       | 293622  | 1.79769e+30 | 1.79769e+30 | 0.14732 | 0.743774  |
| gene0    | gene0    | dnaA      | gi 57650036 ref NC_002951.2 :543-1905        | MVR | M36C05 | OK     | 40.8055 | 24.9503 | -0.709707   | 0.961648    | 0.33623 | 0.999883  |
| gene1    | gene1    | dnaN      | gi 57650036 ref NC_002951.2 :2182-3316       | MVR | M36C05 | OK     | 71.5909 | 79.21   | 0.145906    | -0.184909   | 0.8533  | 0.999883  |
| gene10   | gene10   | SACOL0011 | gi 57650036 ref NC_002951.2 :14748-15770     | MVR | M36C05 | OK     | 6.99565 | 14.7477 | 1.07596     | -0.716568   | 0.47364 | 0.999883  |
| gene100  | gene100  | SACOL0104 | gi 57650036 ref NC_002951.2 :115668-124110   | MVR | M36C05 | OK     | 1.12105 | 1.07563 | -0.059664   | 0.029479    | 0.97648 | 0.999883  |
| gene1000 | gene1000 | SACOL1014 | gi 57650036 ref NC_002951.2 :1021518-1023363 | MVR | M36C05 | OK     | 35.1437 | 24.4545 | -0.523168   | 0.689868    | 0.49028 | 0.999883  |
| gene1001 | gene1001 | fabI      | gi 57650036 ref NC_002951.2 :1023640-1024411 | MVR | M36C05 | OK     | 192.938 | 105.877 | -0.865741   | 1.0773      | 0.28134 | 0.965951  |
| gene1002 | gene1002 | SACOL1017 | gi 57650036 ref NC_002951.2 :1024605-1025691 | MVR | M36C05 | OK     | 79.3075 | 51.6464 | -0.618788   | 0.802256    | 0.42241 | 0.999883  |
| gene1003 | gene1003 | SACOL1018 | gi 57650036 ref NC_002951.2 :1026032-1027601 | MVR | M36C05 | OK     | 45.4413 | 68.1152 | 0.583974    | -0.73204    | 0.46414 | 0.999883  |
| gene1004 | gene1004 | SACOL1019 | gi 57650036 ref NC_002951.2 :1027742-1028501 | MVR | M36C05 | OK     | 16.5023 | 17.9598 | 0.122103    | -0.179506   | 0.85754 | 0.999883  |
| gene1005 | gene1005 | SACOL1020 | gi 57650036 ref NC_002951.2 :1028694-1029204 | MVR | M36C05 | OK     | 603.19  | 760.132 | 0.333637    | -0.374196   | 0.70826 | 0.999883  |
| gene1006 | gene1006 | SACOL1021 | gi 57650036 ref NC_002951.2 :1029316-1031660 | MVR | M36C05 | OK     | 43.8463 | 22.2504 | -0.978626   | 0.583009    | 0.55989 | 0.999883  |
| gene1007 | gene1007 | ypfP      | gi 57650036 ref NC_002951.2 :1029316-1031660 | MVR | M36C05 | OK     | 91.3469 | 89.128  | -0.0354772  | 0.035981    | 0.9713  | 0.999883  |
| gene1008 | gene1008 | murE      | gi 57650036 ref NC_002951.2 :1032092-1035380 | MVR | M36C05 | OK     | 37.8437 | 20.4637 | -0.886986   | 0.726749    | 0.46738 | 0.999883  |
| gene1009 | gene1009 | SACOL1024 | gi 57650036 ref NC_002951.2 :1032092-1035380 | MVR | M36C05 | OK     | 60.0679 | 28.7767 | -1.06169    | 0.237379    | 0.81236 | 0.999883  |
| gene101  | gene101  | SACOL0105 | gi 57650036 ref NC_002951.2 :115668-124110   | MVR | M36C05 | OK     | 2.93381 | 3.07122 | 0.0660359   | -0.054751   | 0.95634 | 0.999883  |
| gene1010 | gene1010 | prfC      | gi 57650036 ref NC_002951.2 :1032092-1035380 | MVR | M36C05 | OK     | 50.5369 | 18.9234 | -1.41717    | 1.27368     | 0.20278 | 0.872472  |
| gene1011 | gene1011 | SACOL1026 | gi 57650036 ref NC_002951.2 :1035681-1036485 | MVR | M36C05 | OK     | 27.6224 | 11.3234 | -1.28653    | 1.87641     | 0.0606  | 0.496665  |
| gene1012 | gene1012 | SACOL1027 | gi 57650036 ref NC_002951.2 :1036543-1036639 | MVR | M36C05 | NOTEST | 0       | 0       | 0           | 0           | 1       | 1         |
| gene1013 | gene1013 | htrA      | gi 57650036 ref NC_002951.2 :1036718-1039028 | MVR | M36C05 | OK     | 13.2908 | 6.89402 | -0.947012   | 1.34946     | 0.17719 | 0.821477  |
| gene1014 | gene1014 | SACOL1030 | gi 57650036 ref NC_002951.2 :1039044-1040403 | MVR | M36C05 | OK     | 50.446  | 33.9556 | -0.571091   | 0.753688    | 0.45104 | 0.999883  |
| gene1015 | gene1015 | SACOL1031 | gi 57650036 ref NC_002951.2 :1040541-1042053 | MVR | M36C05 | OK     | 21.2057 | 30.4133 | 0.520248    | -0.712645   | 0.47607 | 0.999883  |
| gene1018 | gene1018 | SACOL1032 | gi 57650036 ref NC_002951.2 :1042539-1043070 | MVR | M36C05 | OK     | 2.47276 | 3.33595 | 0.431973    | -0.499708   | 0.61728 | 0.999883  |
| gene1019 | gene1019 | SACOL1033 | gi 57650036 ref NC_002951.2 :1043318-1043537 | MVR | M36C05 | OK     | 585.86  | 3799.56 | 2.69721     | -3.40271    | 0.00067 | 0.0252863 |
| gene102  | gene102  | SACOL0106 | gi 57650036 ref NC_002951.2 :115668-124110   | MVR | M36C05 | OK     | 2.74902 | 4.97106 | 0.854637    | -0.462264   | 0.64389 | 0.999883  |
| gene1020 | gene1020 | SACOL1034 | gi 57650036 ref NC_002951.2 :1043617-1044604 | MVR | M36C05 | OK     | 23.9888 | 44.9789 | 0.906888    | -1.26923    | 0.20436 | 0.876676  |
| gene1021 | gene1021 | SACOL1035 | gi 57650036 ref NC_002951.2 :1044802-1044979 | MVR | M36C05 | OK     | 133.854 | 126.812 | -0.0779638  | 0.104594    | 0.9167  | 0.999883  |
| gene1022 | gene1022 | SACOL1036 | gi 57650036 ref NC_002951.2 :1044993-1045596 | MVR | M36C05 | OK     | 374.598 | 250.636 | -0.579751   | 0.688307    | 0.49126 | 0.999883  |
| gene1023 | gene1023 | SACOL1037 | gi 57650036 ref NC_002951.2 :1045867-1045975 | MVR | M36C05 | NOTEST | 0       | 0       | 0           | 0           | 1       | 1         |

|          |          |           |                                              |     |        |        |         |         |            |           |         |           |
|----------|----------|-----------|----------------------------------------------|-----|--------|--------|---------|---------|------------|-----------|---------|-----------|
| gene1024 | gene1024 | SACOL1038 | gi 57650036 ref NC_002951.2 :1046940-1048905 | MVR | M36C05 | OK     | 1.3774  | 2.06056 | 0.581083   | -0.808881 | 0.41858 | 0.999883  |
| gene1025 | gene1025 | SACOL1039 | gi 57650036 ref NC_002951.2 :1048907-1049866 | MVR | M36C05 | OK     | 0.53302 | 7.84452 | 3.87941    | -1.48304  | 0.13807 | 0.733494  |
| gene1026 | gene1026 | SACOL1040 | gi 57650036 ref NC_002951.2 :1048907-1049866 | MVR | M36C05 | OK     | 2.23763 | 3.99528 | 0.836323   | -0.936604 | 0.34896 | 0.999883  |
| gene1027 | gene1027 | SACOL1041 | gi 57650036 ref NC_002951.2 :1049953-1050244 | MVR | M36C05 | OK     | 52.7907 | 37.2626 | -0.502555  | 0.720441  | 0.47125 | 0.999883  |
| gene1028 | gene1028 | SACOL1042 | gi 57650036 ref NC_002951.2 :1050522-1050810 | MVR | M36C05 | OK     | 20.1498 | 5.61968 | -1.8422    | 2.10066   | 0.03567 | 0.361045  |
| gene1029 | gene1029 | SACOL1043 | gi 57650036 ref NC_002951.2 :1050815-1052297 | MVR | M36C05 | OK     | 31.335  | 7.39445 | -2.08326   | 2.9242    | 0.00345 | 0.0849254 |
| gene103  | gene103  | SACOL0107 | gi 57650036 ref NC_002951.2 :115668-124110   | MVR | M36C05 | OK     | 3.5842  | 2.30831 | -0.63481   | 0.404067  | 0.68616 | 0.999883  |
| gene1030 | gene1030 | SACOL1044 | gi 57650036 ref NC_002951.2 :1052385-1052742 | MVR | M36C05 | OK     | 45.9306 | 22.117  | -1.0543    | 1.51853   | 0.12888 | 0.710909  |
| gene1031 | gene1031 | SACOL1045 | gi 57650036 ref NC_002951.2 :1053218-1054178 | MVR | M36C05 | OK     | 6.59452 | 2.75699 | -1.25817   | 1.75114   | 0.07992 | 0.562641  |
| gene1032 | gene1032 | SACOL1046 | gi 57650036 ref NC_002951.2 :1054223-1054355 | MVR | M36C05 | OK     | 124.552 | 477.466 | 1.93865    | -1.73343  | 0.08302 | 0.574038  |
| gene1033 | gene1033 | SACOL1047 | gi 57650036 ref NC_002951.2 :1054418-1054709 | MVR | M36C05 | OK     | 52.1139 | 55.8939 | 0.101023   | -0.146449 | 0.88357 | 0.999883  |
| gene1034 | gene1034 | SACOL1048 | gi 57650036 ref NC_002951.2 :1054852-1055350 | MVR | M36C05 | OK     | 27.8892 | 48.911  | 0.810451   | -1.18557  | 0.23579 | 0.904919  |
| gene1035 | gene1035 | menA      | gi 57650036 ref NC_002951.2 :1055401-1056340 | MVR | M36C05 | OK     | 37.0485 | 42.9792 | 0.214222   | -0.297527 | 0.76606 | 0.999883  |
| gene1036 | gene1036 | SACOL1050 | gi 57650036 ref NC_002951.2 :1056490-1056595 | MVR | M36C05 | NOTEST | 0       | 0       | 0          | 0         | 1       | 1         |
| gene1037 | gene1037 | SACOL1051 | gi 57650036 ref NC_002951.2 :1056671-1061147 | MVR | M36C05 | OK     | 20.0663 | 12.2014 | -0.717723  | 0.233614  | 0.81528 | 0.999883  |
| gene1038 | gene1038 | menD      | gi 57650036 ref NC_002951.2 :1056671-1061147 | MVR | M36C05 | OK     | 23.3547 | 20.8624 | -0.162804  | 0.076155  | 0.9393  | 0.999883  |
| gene1039 | gene1039 | SACOL1053 | gi 57650036 ref NC_002951.2 :1056671-1061147 | MVR | M36C05 | OK     | 23.6908 | 20.8205 | -0.186323  | 0.05561   | 0.95565 | 0.999883  |
| gene104  | gene104  | SACOL0108 | gi 57650036 ref NC_002951.2 :124113-124878   | MVR | M36C05 | OK     | 5.18763 | 4.49102 | -0.208032  | 0.287262  | 0.77391 | 0.999883  |
| gene1040 | gene1040 | menB      | gi 57650036 ref NC_002951.2 :1056671-1061147 | MVR | M36C05 | OK     | 238.287 | 180.181 | -0.403255  | 0.373928  | 0.70846 | 0.999883  |
| gene1041 | gene1041 | sspC      | gi 57650036 ref NC_002951.2 :1061385-1061715 | MVR | M36C05 | OK     | 6.49596 | 10.6511 | 0.713389   | -0.843448 | 0.39898 | 0.999883  |
| gene1042 | gene1042 | sspB1     | gi 57650036 ref NC_002951.2 :1061752-1062934 | MVR | M36C05 | OK     | 3.17438 | 8.42043 | 1.40742    | -2.01764  | 0.04363 | 0.40838   |
| gene1043 | gene1043 | sspA      | gi 57650036 ref NC_002951.2 :1063015-1064026 | MVR | M36C05 | OK     | 4.97844 | 3.6712  | -0.439444  | 0.620701  | 0.5348  | 0.999883  |
| gene1044 | gene1044 | SACOL1058 | gi 57650036 ref NC_002951.2 :1064553-1065708 | MVR | M36C05 | OK     | 40.5789 | 56.1085 | 0.46749    | -0.620501 | 0.53493 | 0.999883  |
| gene1045 | gene1045 | SACOL1059 | gi 57650036 ref NC_002951.2 :1065903-1066914 | MVR | M36C05 | OK     | 12.0374 | 23.5229 | 0.966536   | -1.40546  | 0.15989 | 0.780233  |
| gene1046 | gene1046 | SACOL1060 | gi 57650036 ref NC_002951.2 :1067066-1067486 | MVR | M36C05 | OK     | 28.6067 | 34.5439 | 0.272081   | -0.398218 | 0.69047 | 0.999883  |
| gene1047 | gene1047 | atl       | gi 57650036 ref NC_002951.2 :1067692-1071463 | MVR | M36C05 | OK     | 557.285 | 529.032 | -0.0750593 | 0.07848   | 0.93745 | 0.999883  |
| gene1048 | gene1048 | SACOL1063 | gi 57650036 ref NC_002951.2 :1071690-1072125 | MVR | M36C05 | OK     | 18.1401 | 14.5448 | -0.318683  | 0.452734  | 0.65074 | 0.999883  |
| gene1049 | gene1049 | SACOL1064 | gi 57650036 ref NC_002951.2 :1072279-1072750 | MVR | M36C05 | OK     | 531.705 | 571.097 | 0.10311    | -0.119969 | 0.90451 | 0.999883  |
| gene105  | gene105  | SACOL0109 | gi 57650036 ref NC_002951.2 :125073-125481   | MVR | M36C05 | NOTEST | 0       | 0       | 0          | 0         | 1       | 1         |
| gene1050 | gene1050 | SACOL1065 | gi 57650036 ref NC_002951.2 :1072797-1074015 | MVR | M36C05 | OK     | 157.326 | 245.08  | 0.639497   | -0.718792 | 0.47227 | 0.999883  |
| gene1051 | gene1051 | SACOL1066 | gi 57650036 ref NC_002951.2 :1074465-1075659 | MVR | M36C05 | OK     | 31.532  | 8.09686 | -1.96138   | 2.79267   | 0.00523 | 0.110421  |
| gene1052 | gene1052 | qoxD      | gi 57650036 ref NC_002951.2 :1076195-1076474 | MVR | M36C05 | OK     | 1734.84 | 1488.64 | -0.220804  | 0.258577  | 0.79596 | 0.999883  |
| gene1053 | gene1053 | qoxC      | gi 57650036 ref NC_002951.2 :1076482-1080166 | MVR | M36C05 | OK     | 462.55  | 553.298 | 0.258447   | -0.097844 | 0.92206 | 0.999883  |

|          |          |           |                                              |     |        |        |         |         |             |             |         |           |
|----------|----------|-----------|----------------------------------------------|-----|--------|--------|---------|---------|-------------|-------------|---------|-----------|
| gene1054 | gene1054 | qoxA      | gi 57650036 ref NC_002951.2 :1076482-1080166 | MVR | M36C05 | OK     | 444.685 | 555.537 | 0.321098    | -0.256011   | 0.79794 | 0.999883  |
| gene1055 | gene1055 | qoxB      | gi 57650036 ref NC_002951.2 :1076482-1080166 | MVR | M36C05 | OK     | 398.026 | 505.655 | 0.345292    | -0.184957   | 0.85326 | 0.999883  |
| gene1056 | gene1056 | SACOL1071 | gi 57650036 ref NC_002951.2 :1080737-1081055 | MVR | M36C05 | OK     | 160.764 | 220.8   | 0.457796    | -0.650552   | 0.51534 | 0.999883  |
| gene1057 | gene1057 | folD      | gi 57650036 ref NC_002951.2 :1081860-1082721 | MVR | M36C05 | OK     | 196.9   | 327.558 | 0.734287    | -0.841271   | 0.4002  | 0.999883  |
| gene1058 | gene1058 | purE      | gi 57650036 ref NC_002951.2 :1082921-1084515 | MVR | M36C05 | OK     | 157.985 | 85.4401 | -0.886808   | 0.451241    | 0.65182 | 0.999883  |
| gene1059 | gene1059 | purK      | gi 57650036 ref NC_002951.2 :1082921-1084515 | MVR | M36C05 | OK     | 173.755 | 115.025 | -0.595099   | 0.612575    | 0.54016 | 0.999883  |
| gene106  | gene106  | SACOL0110 | gi 57650036 ref NC_002951.2 :125530-126157   | MVR | M36C05 | OK     | 2.32081 | 2.84344 | 0.293008    | -0.35059    | 0.7259  | 0.999883  |
| gene1060 | gene1060 | purC      | gi 57650036 ref NC_002951.2 :1084518-1085486 | MVR | M36C05 | OK     | 142.82  | 62.4912 | -1.19248    | 1.25522     | 0.2094  | 0.887248  |
| gene1061 | gene1061 | purS      | gi 57650036 ref NC_002951.2 :1084518-1085486 | MVR | M36C05 | OK     | 417.889 | 199.494 | -1.06677    | 0.748604    | 0.4541  | 0.999883  |
| gene1062 | gene1062 | purQ      | gi 57650036 ref NC_002951.2 :1085487-1090825 | MVR | M36C05 | OK     | 281.872 | 133.737 | -1.07564    | 0.350145    | 0.72623 | 0.999883  |
| gene1063 | gene1063 | purL      | gi 57650036 ref NC_002951.2 :1085487-1090825 | MVR | M36C05 | OK     | 360.076 | 100.511 | -1.84094    | 1.25816     | 0.20833 | 0.885625  |
| gene1064 | gene1064 | purF      | gi 57650036 ref NC_002951.2 :1085487-1090825 | MVR | M36C05 | OK     | 364.643 | 89.0408 | -2.03395    | 1.0847      | 0.27805 | 0.963271  |
| gene1065 | gene1065 | purM      | gi 57650036 ref NC_002951.2 :1085487-1090825 | MVR | M36C05 | OK     | 451.702 | 95.6377 | -2.23972    | 1.02487     | 0.30542 | 0.99095   |
| gene1066 | gene1066 | purN      | gi 57650036 ref NC_002951.2 :1090827-1091394 | MVR | M36C05 | OK     | 333.041 | 58.9639 | -2.49779    | 3.23361     | 0.00122 | 0.0396692 |
| gene1067 | gene1067 | purH      | gi 57650036 ref NC_002951.2 :1091408-1092887 | MVR | M36C05 | OK     | 280.592 | 48.2629 | -2.53949    | 2.9401      | 0.00328 | 0.0821628 |
| gene1068 | gene1068 | purD      | gi 57650036 ref NC_002951.2 :1092908-1094156 | MVR | M36C05 | OK     | 480.77  | 62.4864 | -2.94373    | 3.3501      | 0.00081 | 0.0292314 |
| gene1069 | gene1069 | SACOL1084 | gi 57650036 ref NC_002951.2 :1094420-1096620 | MVR | M36C05 | OK     | 6.71965 | 4.72503 | -0.508064   | 0.358896    | 0.71967 | 0.999883  |
| gene107  | gene107  | SACOL0111 | gi 57650036 ref NC_002951.2 :126368-127145   | MVR | M36C05 | OK     | 509.943 | 712.009 | 0.48156     | -0.513616   | 0.60752 | 0.999883  |
| gene1070 | gene1070 | SACOL1085 | gi 57650036 ref NC_002951.2 :1094420-1096620 | MVR | M36C05 | OK     | 7.85099 | 9.91279 | 0.336417    | -0.425035   | 0.67081 | 0.999883  |
| gene1071 | gene1071 | SACOL1086 | gi 57650036 ref NC_002951.2 :1096634-1097210 | MVR | M36C05 | OK     | 6.80657 | 6.16611 | -0.142568   | 0.194144    | 0.84606 | 0.999883  |
| gene1072 | gene1072 | SACOL1087 | gi 57650036 ref NC_002951.2 :1097856-1097991 | MVR | M36C05 | OK     | 0       | 343.556 | 1.79769e+30 | 1.79769e+30 | 0.00944 | 0.161634  |
| gene1073 | gene1073 | SACOL1088 | gi 57650036 ref NC_002951.2 :1098142-1099438 | MVR | M36C05 | OK     | 192.472 | 273.19  | 0.505254    | -0.554939   | 0.57894 | 0.999883  |
| gene1074 | gene1074 | SACOL1089 | gi 57650036 ref NC_002951.2 :1099862-1101035 | MVR | M36C05 | OK     | 16.6386 | 15.2971 | -0.121277   | 0.176268    | 0.86008 | 0.999883  |
| gene1075 | gene1075 | SACOL1090 | gi 57650036 ref NC_002951.2 :1101088-1101631 | MVR | M36C05 | OK     | 40.0997 | 246.264 | 2.61855     | -3.50005    | 0.00047 | 0.019237  |
| gene1076 | gene1076 | ptsH      | gi 57650036 ref NC_002951.2 :1101784-1102051 | MVR | M36C05 | OK     | 264.897 | 658.333 | 1.31339     | -1.7974     | 0.07227 | 0.527706  |
| gene1077 | gene1077 | ptsI      | gi 57650036 ref NC_002951.2 :1102053-1103772 | MVR | M36C05 | OK     | 344.433 | 470.691 | 0.45056     | -0.463478   | 0.64302 | 0.999883  |
| gene1078 | gene1078 | SACOL1093 | gi 57650036 ref NC_002951.2 :1104008-1104242 | MVR | M36C05 | OK     | 28.9618 | 12.001  | -1.271      | 1.46712     | 0.14234 | 0.740755  |
| gene1079 | gene1079 | cydA      | gi 57650036 ref NC_002951.2 :1104439-1106817 | MVR | M36C05 | OK     | 3.54607 | 8.91759 | 1.33043     | -1.46831    | 0.14202 | 0.740572  |
| gene108  | gene108  | SACOL0112 | gi 57650036 ref NC_002951.2 :127288-127411   | MVR | M36C05 | NOTEST | 0       | 0       | 0           | 0           | 1       | 1         |
| gene1080 | gene1080 | cydB      | gi 57650036 ref NC_002951.2 :1104439-1106817 | MVR | M36C05 | OK     | 4.55485 | 7.53068 | 0.725376    | -0.682828   | 0.49472 | 0.999883  |
| gene1081 | gene1081 | SACOL1096 | gi 57650036 ref NC_002951.2 :1106949-1107612 | MVR | M36C05 | OK     | 29.6967 | 52.2005 | 0.813761    | -1.16944    | 0.24223 | 0.913772  |
| gene1082 | gene1082 | SACOL1097 | gi 57650036 ref NC_002951.2 :1107647-1107827 | MVR | M36C05 | OK     | 112.304 | 139.732 | 0.315245    | -0.424456   | 0.67123 | 0.999883  |
| gene1083 | gene1083 | SACOL1098 | gi 57650036 ref NC_002951.2 :1107960-1109876 | MVR | M36C05 | OK     | 166.852 | 162.826 | -0.0352439  | 0.03824     | 0.9695  | 0.999883  |



|          |          |           |                                              |     |        |        |         |         |           |           |         |          |
|----------|----------|-----------|----------------------------------------------|-----|--------|--------|---------|---------|-----------|-----------|---------|----------|
| gene1084 | gene1084 | SACOL1099 | gi 57650036 ref NC_002951.2 :1107960-1109876 | MVR | M36C05 | OK     | 86.8525 | 185.1   | 1.09167   | -0.162814 | 0.87067 | 0.999883 |
| gene1085 | gene1085 | def       | gi 57650036 ref NC_002951.2 :1110356-1110908 | MVR | M36C05 | OK     | 37.2244 | 26.976  | -0.464573 | 0.681685  | 0.49544 | 0.999883 |
| gene1086 | gene1086 | SACOL1101 | gi 57650036 ref NC_002951.2 :1111272-1111899 | MVR | M36C05 | OK     | 146.356 | 105.207 | -0.47625  | 0.623377  | 0.53304 | 0.999883 |
| gene1087 | gene1087 | pdhA      | gi 57650036 ref NC_002951.2 :1112069-1113182 | MVR | M36C05 | OK     | 218.989 | 291.769 | 0.413967  | -0.458647 | 0.64649 | 0.999883 |
| gene1088 | gene1088 | pdhB      | gi 57650036 ref NC_002951.2 :1113185-1114163 | MVR | M36C05 | OK     | 224.137 | 248.052 | 0.146262  | -0.16592  | 0.86822 | 0.999883 |
| gene1089 | gene1089 | pdhC      | gi 57650036 ref NC_002951.2 :1114253-1115546 | MVR | M36C05 | OK     | 259.045 | 266.678 | 0.0418944 | -0.045425 | 0.96377 | 0.999883 |
| gene109  | gene109  | SACOL0113 | gi 57650036 ref NC_002951.2 :127489-129116   | MVR | M36C05 | NOTEST | 0.85996 | 0.57139 | -0.589795 | 0.48653   | 0.62659 | 1        |
| gene1090 | gene1090 | pdhD      | gi 57650036 ref NC_002951.2 :1115549-1116956 | MVR | M36C05 | OK     | 518.949 | 532.08  | 0.0360502 | -0.036998 | 0.97049 | 0.999883 |
| gene1091 | gene1091 | SACOL1106 | gi 57650036 ref NC_002951.2 :1117123-1117399 | MVR | M36C05 | OK     | 61.3157 | 40.0039 | -0.616117 | 0.881439  | 0.37808 | 0.999883 |
| gene1092 | gene1092 | SACOL1107 | gi 57650036 ref NC_002951.2 :1117542-1118082 | MVR | M36C05 | OK     | 6.83875 | 1.62379 | -2.07437  | 2.39594   | 0.01658 | 0.231163 |
| gene1093 | gene1093 | SACOL1108 | gi 57650036 ref NC_002951.2 :1118094-1119979 | MVR | M36C05 | OK     | 7.7884  | 1.97115 | -1.98229  | 2.22998   | 0.02575 | 0.304771 |
| gene1094 | gene1094 | SACOL1109 | gi 57650036 ref NC_002951.2 :1118094-1119979 | MVR | M36C05 | OK     | 4.78766 | 2.39812 | -0.997416 | 0.850598  | 0.39499 | 0.999883 |
| gene1095 | gene1095 | SACOL1110 | gi 57650036 ref NC_002951.2 :1119984-1121867 | MVR | M36C05 | OK     | 7.18417 | 2.35088 | -1.61162  | 0.512844  | 0.60806 | 0.999883 |
| gene1096 | gene1096 | SACOL1111 | gi 57650036 ref NC_002951.2 :1119984-1121867 | MVR | M36C05 | OK     | 14.9983 | 49.833  | 1.7323    | -2.21639  | 0.02666 | 0.309278 |
| gene1097 | gene1097 | SACOL1112 | gi 57650036 ref NC_002951.2 :1121940-1122960 | MVR | M36C05 | OK     | 306.35  | 484.787 | 0.66217   | -0.711914 | 0.47652 | 0.999883 |
| gene1098 | gene1098 | SACOL1113 | gi 57650036 ref NC_002951.2 :1123242-1123662 | MVR | M36C05 | OK     | 165.152 | 237.302 | 0.522929  | -0.700064 | 0.48389 | 0.999883 |
| gene1099 | gene1099 | SACOL1114 | gi 57650036 ref NC_002951.2 :1123743-1125096 | MVR | M36C05 | OK     | 504.654 | 1171.88 | 1.21546   | -1.25097  | 0.21095 | 0.889865 |
| gene11   | gene11   | SACOL0012 | gi 57650036 ref NC_002951.2 :16111-17101     | MVR | M36C05 | OK     | 3.58805 | 6.28149 | 0.807906  | -1.1443   | 0.2525  | 0.92853  |
| gene110  | gene110  | SACOL0114 | gi 57650036 ref NC_002951.2 :127489-129116   | MVR | M36C05 | OK     | 0.99726 | 1.34297 | 0.42939   | -0.358375 | 0.72006 | 0.999883 |
| gene1100 | gene1100 | SACOL1115 | gi 57650036 ref NC_002951.2 :1125279-1125894 | MVR | M36C05 | OK     | 179.992 | 339.661 | 0.916162  | -1.11062  | 0.26673 | 0.949974 |
| gene1101 | gene1101 | SACOL1116 | gi 57650036 ref NC_002951.2 :1126050-1126878 | MVR | M36C05 | OK     | 134.563 | 247.31  | 0.878041  | -1.04994  | 0.29375 | 0.976945 |
| gene1102 | gene1102 | SACOL1117 | gi 57650036 ref NC_002951.2 :1127031-1127223 | MVR | M36C05 | OK     | 383.619 | 308.176 | -0.315919 | 0.464448  | 0.64233 | 0.999883 |
| gene1103 | gene1103 | typA      | gi 57650036 ref NC_002951.2 :1127324-1129172 | MVR | M36C05 | OK     | 92.487  | 23.8749 | -1.95375  | 2.42395   | 0.01535 | 0.217431 |
| gene1104 | gene1104 | SACOL1119 | gi 57650036 ref NC_002951.2 :1129311-1129479 | MVR | M36C05 | OK     | 57.137  | 84.513  | 0.564747  | -0.63884  | 0.52293 | 0.999883 |
| gene1105 | gene1105 | SACOL1120 | gi 57650036 ref NC_002951.2 :1129480-1129963 | MVR | M36C05 | OK     | 65.2647 | 80.3683 | 0.300324  | -0.430607 | 0.66675 | 0.999883 |
| gene1106 | gene1106 | SACOL1121 | gi 57650036 ref NC_002951.2 :1130103-1130379 | MVR | M36C05 | OK     | 839.016 | 411.29  | -1.02854  | 1.35518   | 0.17536 | 0.821477 |
| gene1107 | gene1107 | SACOL1122 | gi 57650036 ref NC_002951.2 :1130692-1131919 | MVR | M36C05 | OK     | 91.7762 | 98.1169 | 0.0963815 | -0.11745  | 0.9065  | 0.999883 |
| gene1108 | gene1108 | pyc       | gi 57650036 ref NC_002951.2 :1132472-1135925 | MVR | M36C05 | OK     | 71.1198 | 198.42  | 1.48023   | -1.57477  | 0.11531 | 0.671711 |
| gene1109 | gene1109 | ctaA      | gi 57650036 ref NC_002951.2 :1136064-1137135 | MVR | M36C05 | OK     | 63.865  | 43.4219 | -0.556601 | 0.738359  | 0.4603  | 0.999883 |
| gene111  | gene111  | SACOL0115 | gi 57650036 ref NC_002951.2 :129325-133131   | MVR | M36C05 | OK     | 1.4884  | 1.82425 | 0.293545  | -0.199898 | 0.84156 | 0.999883 |
| gene1110 | gene1110 | ctaB      | gi 57650036 ref NC_002951.2 :1137415-1138327 | MVR | M36C05 | OK     | 172.366 | 77.9143 | -1.14552  | 1.42087   | 0.15535 | 0.769852 |
| gene1111 | gene1111 | SACOL1126 | gi 57650036 ref NC_002951.2 :1138351-1138813 | MVR | M36C05 | OK     | 202.463 | 66.5594 | -1.60495  | 2.21009   | 0.0271  | 0.310305 |
| gene1112 | gene1112 | SACOL1127 | gi 57650036 ref NC_002951.2 :1139024-1139228 | MVR | M36C05 | OK     | 6.21505 | 19.6997 | 1.66433   | -1.30692  | 0.19124 | 0.851696 |

|          |          |           |                                              |     |        |        |         |         |            |           |         |          |
|----------|----------|-----------|----------------------------------------------|-----|--------|--------|---------|---------|------------|-----------|---------|----------|
| gene1113 | gene1113 | SACOL1128 | gi 57650036 ref NC_002951.2 :1139277-1140177 | MVR | M36C05 | OK     | 40.6556 | 91.0684 | 1.1635     | -1.55273  | 0.12049 | 0.689371 |
| gene1114 | gene1114 | SACOL1129 | gi 57650036 ref NC_002951.2 :1140192-1140627 | MVR | M36C05 | OK     | 64.04   | 87.2685 | 0.446487   | -0.645442 | 0.51864 | 0.999883 |
| gene1115 | gene1115 | SACOL1130 | gi 57650036 ref NC_002951.2 :1140689-1141616 | MVR | M36C05 | OK     | 41.0079 | 50.6676 | 0.305162   | -0.418768 | 0.67539 | 0.999883 |
| gene1116 | gene1116 | SACOL1131 | gi 57650036 ref NC_002951.2 :1141854-1142109 | MVR | M36C05 | OK     | 20.3084 | 12.3668 | -0.715597  | 0.85128   | 0.39461 | 0.999883 |
| gene1117 | gene1117 | SACOL1132 | gi 57650036 ref NC_002951.2 :1142111-1142501 | MVR | M36C05 | OK     | 16.8603 | 5.77234 | -1.5464    | 1.99375   | 0.04618 | 0.423039 |
| gene1118 | gene1118 | SACOL1133 | gi 57650036 ref NC_002951.2 :1142570-1143113 | MVR | M36C05 | OK     | 15.93   | 16.0957 | 0.0149289  | -0.021704 | 0.98268 | 0.999883 |
| gene1119 | gene1119 | coaD      | gi 57650036 ref NC_002951.2 :1143114-1143597 | MVR | M36C05 | OK     | 56.9378 | 43.3052 | -0.394845  | 0.576441  | 0.56432 | 0.999883 |
| gene112  | gene112  | SACOL0116 | gi 57650036 ref NC_002951.2 :129325-133131   | MVR | M36C05 | OK     | 1.09475 | 1.48551 | 0.440358   | -0.272599 | 0.78516 | 0.999883 |
| gene1120 | gene1120 | SACOL1135 | gi 57650036 ref NC_002951.2 :1143658-1144798 | MVR | M36C05 | OK     | 13.8541 | 8.9143  | -0.636122  | 0.932977  | 0.35083 | 0.999883 |
| gene1121 | gene1121 | SACOL1136 | gi 57650036 ref NC_002951.2 :1144924-1145482 | MVR | M36C05 | OK     | 189.442 | 64.1493 | -1.56225   | 2.10115   | 0.03563 | 0.361045 |
| gene1122 | gene1122 | rpmF      | gi 57650036 ref NC_002951.2 :1145561-1145735 | MVR | M36C05 | OK     | 2414.65 | 950.525 | -1.34502   | 1.89791   | 0.05771 | 0.48127  |
| gene1123 | gene1123 | isdB      | gi 57650036 ref NC_002951.2 :1145888-1147826 | MVR | M36C05 | OK     | 2.72995 | 4.24858 | 0.638108   | -0.929509 | 0.35263 | 0.999883 |
| gene1124 | gene1124 | isdA      | gi 57650036 ref NC_002951.2 :1148028-1149081 | MVR | M36C05 | OK     | 4.51468 | 6.33416 | 0.488531   | -0.70321  | 0.48193 | 0.999883 |
| gene1125 | gene1125 | isdC      | gi 57650036 ref NC_002951.2 :1149289-1151924 | MVR | M36C05 | OK     | 1.77932 | 1.36799 | -0.379272  | 0.232212  | 0.81637 | 0.999883 |
| gene1126 | gene1126 | isdD      | gi 57650036 ref NC_002951.2 :1149289-1151924 | MVR | M36C05 | OK     | 2.53664 | 0.88009 | -1.52719   | 1.20523   | 0.22811 | 0.898537 |
| gene1127 | gene1127 | SACOL1143 | gi 57650036 ref NC_002951.2 :1149289-1151924 | MVR | M36C05 | OK     | 2.49965 | 2.76143 | 0.143686   | -0.135363 | 0.89233 | 0.999883 |
| gene1128 | gene1128 | SACOL1144 | gi 57650036 ref NC_002951.2 :1151936-1152902 | MVR | M36C05 | OK     | 1.41858 | 1.58364 | 0.158798   | -0.192495 | 0.84736 | 0.999883 |
| gene1129 | gene1129 | srtB      | gi 57650036 ref NC_002951.2 :1152963-1153698 | MVR | M36C05 | OK     | 1.37301 | 0.82491 | -0.735021  | 0.752033  | 0.45203 | 0.999883 |
| gene113  | gene113  | SACOL0117 | gi 57650036 ref NC_002951.2 :129325-133131   | MVR | M36C05 | OK     | 3.77949 | 3.31323 | -0.189955  | 0.214805  | 0.82992 | 0.999883 |
| gene1130 | gene1130 | SACOL1146 | gi 57650036 ref NC_002951.2 :1153716-1154040 | MVR | M36C05 | OK     | 6.2582  | 10.2428 | 0.710786   | -0.826287 | 0.40864 | 0.999883 |
| gene1131 | gene1131 | SACOL1147 | gi 57650036 ref NC_002951.2 :1154423-1155164 | MVR | M36C05 | OK     | 27.1416 | 24.6765 | -0.137369  | 0.200496  | 0.84109 | 0.999883 |
| gene1132 | gene1132 | pheS      | gi 57650036 ref NC_002951.2 :1155544-1159005 | MVR | M36C05 | OK     | 18.9095 | 8.72881 | -1.11525   | 0.691155  | 0.48947 | 0.999883 |
| gene1133 | gene1133 | pheT      | gi 57650036 ref NC_002951.2 :1155544-1159005 | MVR | M36C05 | OK     | 22.5751 | 13.3558 | -0.757262  | 0.876279  | 0.38088 | 0.999883 |
| gene1134 | gene1134 | rnhC      | gi 57650036 ref NC_002951.2 :1159175-1160114 | MVR | M36C05 | OK     | 6.78813 | 3.88006 | -0.806935  | 1.14484   | 0.25228 | 0.92853  |
| gene1135 | gene1135 | SACOL1151 | gi 57650036 ref NC_002951.2 :1160483-1160750 | MVR | M36C05 | OK     | 73.0164 | 51.7943 | -0.495427  | 0.714847  | 0.4747  | 0.999883 |
| gene1136 | gene1136 | SACOL1152 | gi 57650036 ref NC_002951.2 :1160750-1161272 | MVR | M36C05 | OK     | 71.1161 | 34.9783 | -1.02372   | 1.48161   | 0.13844 | 0.733494 |
| gene1137 | gene1137 | SACOL1153 | gi 57650036 ref NC_002951.2 :1161344-1163057 | MVR | M36C05 | OK     | 30.2455 | 29.5759 | -0.0322983 | 0.042877  | 0.9658  | 0.999883 |
| gene1138 | gene1138 | SACOL1154 | gi 57650036 ref NC_002951.2 :1163066-1165415 | MVR | M36C05 | OK     | 38.5352 | 30.9727 | -0.315183  | 0.396481  | 0.69175 | 0.999883 |
| gene1139 | gene1139 | trxA      | gi 57650036 ref NC_002951.2 :1165587-1165902 | MVR | M36C05 | OK     | 826.576 | 1303.66 | 0.657348   | -0.782395 | 0.43398 | 0.999883 |
| gene114  | gene114  | sodA1     | gi 57650036 ref NC_002951.2 :133398-133998   | MVR | M36C05 | OK     | 160.266 | 62.9228 | -1.34881   | 1.81304   | 0.06983 | 0.522414 |
| gene1140 | gene1140 | SACOL1156 | gi 57650036 ref NC_002951.2 :1165964-1166060 | MVR | M36C05 | NOTEST | 0       | 0       | 0          | 0         | 1       | 1        |
| gene1141 | gene1141 | uvrC      | gi 57650036 ref NC_002951.2 :1166225-1168007 | MVR | M36C05 | OK     | 15.9548 | 30.445  | 0.932217   | -1.26954  | 0.20425 | 0.876676 |
| gene1142 | gene1142 | sdhC      | gi 57650036 ref NC_002951.2 :1168330-1168945 | MVR | M36C05 | OK     | 286.283 | 201.881 | -0.503933  | 0.613563  | 0.5395  | 0.999883 |

|          |          |             |                                              |     |        |        |         |         |             |           |         |           |
|----------|----------|-------------|----------------------------------------------|-----|--------|--------|---------|---------|-------------|-----------|---------|-----------|
| gene1143 | gene1143 | sdhA        | gi 57650036 ref NC_002951.2 :1168996-1171578 | MVR | M36C05 | OK     | 619.83  | 458.375 | -0.435343   | 0.306918  | 0.75891 | 0.999883  |
| gene1144 | gene1144 | sdhB        | gi 57650036 ref NC_002951.2 :1168996-1171578 | MVR | M36C05 | OK     | 1927.68 | 1374.56 | -0.487892   | 0.374521  | 0.70802 | 0.999883  |
| gene1145 | gene1145 | murI        | gi 57650036 ref NC_002951.2 :1171813-1172614 | MVR | M36C05 | OK     | 92.1142 | 174.738 | 0.923701    | -1.15721  | 0.24719 | 0.92193   |
| gene1146 | gene1146 | SACOL1162   | gi 57650036 ref NC_002951.2 :1172625-1173709 | MVR | M36C05 | OK     | 121.221 | 196.04  | 0.693503    | -0.523566 | 0.60058 | 0.999883  |
| gene1147 | gene1147 | SACOL1163   | gi 57650036 ref NC_002951.2 :1172625-1173709 | MVR | M36C05 | OK     | 247.143 | 307.292 | 0.314265    | -0.279005 | 0.78024 | 0.999883  |
| gene1148 | gene1148 | SACOL1164   | gi 57650036 ref NC_002951.2 :1174197-1174527 | MVR | M36C05 | OK     | 849.472 | 364.596 | -1.22027    | 1.53984   | 0.1236  | 0.696637  |
| gene1149 | gene1149 | SACOL1165   | gi 57650036 ref NC_002951.2 :1174697-1174805 | MVR | M36C05 | NOTEST | 0       | 0       | 0           | 0         | 1       | 1         |
| gene115  | gene115  | SACOL0119   | gi 57650036 ref NC_002951.2 :134365-135091   | MVR | M36C05 | OK     | 11.4138 | 17.4103 | 0.609165    | -0.892144 | 0.37232 | 0.999883  |
| gene1150 | gene1150 | SACOL1166   | gi 57650036 ref NC_002951.2 :1174895-1175297 | MVR | M36C05 | OK     | 27.1127 | 13.0585 | -1.05399    | 1.48929   | 0.13641 | 0.732537  |
| gene1151 | gene1151 | SACOL1167   | gi 57650036 ref NC_002951.2 :1175968-1176475 | MVR | M36C05 | OK     | 18.5578 | 7.91298 | -1.22973    | 1.73139   | 0.08338 | 0.574119  |
| gene1152 | gene1152 | efb         | gi 57650036 ref NC_002951.2 :1176733-1177231 | MVR | M36C05 | OK     | 246.745 | 57.8039 | -2.09378    | 2.8268    | 0.0047  | 0.101483  |
| gene1153 | gene1153 | SACOL1169   | gi 57650036 ref NC_002951.2 :1177384-1177735 | MVR | M36C05 | OK     | 355.287 | 69.4914 | -2.35408    | 3.26685   | 0.00109 | 0.0364367 |
| gene1154 | gene1154 | SACOL1170   | gi 57650036 ref NC_002951.2 :1178160-1178406 | MVR | M36C05 | OK     | 17.2158 | 10.2897 | -0.742523   | 0.830202  | 0.40643 | 0.999883  |
| gene1155 | gene1155 | SACOL1171   | gi 57650036 ref NC_002951.2 :1178556-1178742 | MVR | M36C05 | OK     | 52.6856 | 24.8235 | -1.08571    | 1.18997   | 0.23406 | 0.902925  |
| gene1156 | gene1156 | SACOL1172   | gi 57650036 ref NC_002951.2 :1179363-1179597 | MVR | M36C05 | OK     | 56.6644 | 30.0025 | -0.917361   | 1.22578   | 0.22028 | 0.89416   |
| gene1157 | gene1157 | hly         | gi 57650036 ref NC_002951.2 :1180073-1181033 | MVR | M36C05 | OK     | 2.30411 | 1.16084 | -0.989041   | 1.20619   | 0.22774 | 0.898537  |
| gene1158 | gene1158 | SACOL1174   | gi 57650036 ref NC_002951.2 :1181705-1182033 | MVR | M36C05 | NOTEST | 0       | 0       | 0           | 0         | 1       | 1         |
| gene1159 | gene1159 | SACOL1175   | gi 57650036 ref NC_002951.2 :1181705-1182033 | MVR | M36C05 | OK     | 56.3055 | 37.2726 | -0.595163   | 0.729623  | 0.46562 | 0.999883  |
| gene116  | gene116  | SACOL0120   | gi 57650036 ref NC_002951.2 :135282-136038   | MVR | M36C05 | OK     | 17.5845 | 10.9135 | -0.688188   | 1.00883   | 0.31306 | 0.994633  |
| gene1160 | gene1160 | SACOL1176   | gi 57650036 ref NC_002951.2 :1182064-1182421 | MVR | M36C05 | OK     | 30.0837 | 41.3741 | 0.459747    | -0.508862 | 0.61085 | 0.999883  |
| gene1161 | gene1161 | SACOL1177   | gi 57650036 ref NC_002951.2 :1182064-1182421 | MVR | M36C05 | OK     | 373.655 | 1061.04 | 1.50569     | -1.2402   | 0.2149  | 0.89416   |
| gene1162 | gene1162 | SACOL1178   | gi 57650036 ref NC_002951.2 :1182589-1183306 | MVR | M36C05 | OK     | 2.37185 | 3.20131 | 0.432652    | -0.543982 | 0.58645 | 0.999883  |
| gene1163 | gene1163 | SACOL1179   | gi 57650036 ref NC_002951.2 :1183413-1184139 | MVR | M36C05 | OK     | 1.39761 | 2.30739 | 0.723304    | -0.834951 | 0.40375 | 0.999883  |
| gene1164 | gene1164 | SACOL1180   | gi 57650036 ref NC_002951.2 :1184233-1184959 | MVR | M36C05 | OK     | 1.39761 | 1.46834 | 0.0712277   | -0.078611 | 0.93734 | 0.999883  |
| gene1165 | gene1165 | arcB1       | gi 57650036 ref NC_002951.2 :1185396-1186398 | MVR | M36C05 | OK     | 2.63075 | 4.67492 | 0.829466    | -1.14385  | 0.25269 | 0.928735  |
| gene1166 | gene1166 | arcC1       | gi 57650036 ref NC_002951.2 :1186420-1187353 | MVR | M36C05 | OK     | 3.79392 | 5.56688 | 0.553178    | -0.778299 | 0.43639 | 0.999883  |
| gene1167 | gene1167 | SACOL1183   | gi 57650036 ref NC_002951.2 :1187524-1189081 | MVR | M36C05 | OK     | 4.78247 | 11.453  | 1.2599      | -1.83718  | 0.06618 | 0.515048  |
| gene1168 | gene1168 | SACOL1184   | gi 57650036 ref NC_002951.2 :1189920-1190868 | MVR | M36C05 | OK     | 19.546  | 16.2179 | -0.269284   | 0.3935    | 0.69395 | 0.999883  |
| gene1169 | gene1169 | SACOL1185   | gi 57650036 ref NC_002951.2 :1191116-1191305 | MVR | M36C05 | OK     | 8.63929 | 18.4185 | 1.09217     | -0.831535 | 0.40567 | 0.999883  |
| gene117  | gene117  | deoD1       | gi 57650036 ref NC_002951.2 :136273-136981   | MVR | M36C05 | OK     | 6.03981 | 1.52046 | -1.99       | 2.45221   | 0.0142  | 0.205915  |
| gene1170 | gene1170 | SACOL_tRNA- | gi 57650036 ref NC_002951.2 :1191779-1191853 | MVR | M36C05 | NOTEST | 0       | 0       | 0           | 0         | 1       | 1         |
| gene1171 | gene1171 | SACOL1186   | gi 57650036 ref NC_002951.2 :1192216-1192351 | MVR | M36C05 | NOTEST | 0       | 0       | 0           | 0         | 1       | 1         |
| gene1172 | gene1172 | SACOL1187   | gi 57650036 ref NC_002951.2 :1192407-1192542 | MVR | M36C05 | OK     | 0       | 85.8891 | 1.79769e+30 | 1.79769e+ | 0.06916 | 0.522414  |

|          |          |           |                                              |     |        |    |         |         |            |           |          |           |
|----------|----------|-----------|----------------------------------------------|-----|--------|----|---------|---------|------------|-----------|----------|-----------|
| gene1173 | gene1173 | SACOL1188 | gi 57650036 ref NC_002951.2 :1192665-1193361 | MVR | M36C05 | OK | 36.0448 | 72.081  | 0.999827   | -1.40092  | 0.16124  | 0.784966  |
| gene1174 | gene1174 | SACOL1189 | gi 57650036 ref NC_002951.2 :1193469-1193910 | MVR | M36C05 | OK | 794.784 | 1560.11 | 0.973012   | -1.06576  | 0.28653  | 0.974912  |
| gene1175 | gene1175 | SACOL1190 | gi 57650036 ref NC_002951.2 :1194104-1195718 | MVR | M36C05 | OK | 43.171  | 50.356  | 0.222103   | -0.283403 | 0.77687  | 0.999883  |
| gene1176 | gene1176 | mraZ      | gi 57650036 ref NC_002951.2 :1195861-1196293 | MVR | M36C05 | OK | 270.857 | 142.551 | -0.926055  | 1.23339   | 0.21743  | 0.89416   |
| gene1177 | gene1177 | mraW      | gi 57650036 ref NC_002951.2 :1196308-1197244 | MVR | M36C05 | OK | 119.252 | 53.4937 | -1.15657   | 1.48978   | 0.13628  | 0.732537  |
| gene1178 | gene1178 | SACOL1193 | gi 57650036 ref NC_002951.2 :1197272-1199874 | MVR | M36C05 | OK | 153.566 | 61.5419 | -1.31922   | 0.733664  | 0.46315  | 0.999883  |
| gene1179 | gene1179 | pbp1      | gi 57650036 ref NC_002951.2 :1197272-1199874 | MVR | M36C05 | OK | 68.1178 | 11.6971 | -2.54188   | 2.75296   | 0.00591  | 0.119299  |
| gene118  | gene118  | SACOL0122 | gi 57650036 ref NC_002951.2 :136987-138340   | MVR | M36C05 | OK | 6.37163 | 4.39802 | -0.53481   | 0.78049   | 0.4351   | 0.999883  |
| gene1180 | gene1180 | mraY      | gi 57650036 ref NC_002951.2 :1200165-1201131 | MVR | M36C05 | OK | 38.3804 | 5.75868 | -2.73656   | 3.87295   | 0.00011  | 0.0060795 |
| gene1181 | gene1181 | murD      | gi 57650036 ref NC_002951.2 :1201132-1202482 | MVR | M36C05 | OK | 54.5888 | 9.29829 | -2.55357   | 3.4924    | 0.00048  | 0.0195727 |
| gene1182 | gene1182 | divIB     | gi 57650036 ref NC_002951.2 :1202497-1203817 | MVR | M36C05 | OK | 65.4209 | 31.9892 | -1.03217   | 1.35027   | 0.17693  | 0.821477  |
| gene1183 | gene1183 | ftsA      | gi 57650036 ref NC_002951.2 :1203922-1205335 | MVR | M36C05 | OK | 243.188 | 268.267 | 0.141602   | -0.152404 | 0.87887  | 0.999883  |
| gene1184 | gene1184 | ftsZ      | gi 57650036 ref NC_002951.2 :1205367-1206540 | MVR | M36C05 | OK | 517.276 | 669.446 | 0.372035   | -0.383589 | 0.70128  | 0.999883  |
| gene1185 | gene1185 | SACOL1200 | gi 57650036 ref NC_002951.2 :1206799-1207591 | MVR | M36C05 | OK | 15.8529 | 40.4365 | 1.35091    | -1.94782  | 0.05144  | 0.446342  |
| gene1186 | gene1186 | SACOL1201 | gi 57650036 ref NC_002951.2 :1207608-1208843 | MVR | M36C05 | OK | 262.628 | 285.993 | 0.12296    | -0.111868 | 0.91093  | 0.999883  |
| gene1187 | gene1187 | ylmF      | gi 57650036 ref NC_002951.2 :1207608-1208843 | MVR | M36C05 | OK | 170.303 | 213.84  | 0.328425   | -0.217442 | 0.82786  | 0.999883  |
| gene1188 | gene1188 | ylmG      | gi 57650036 ref NC_002951.2 :1208854-1209145 | MVR | M36C05 | OK | 272.075 | 254.262 | -0.0976862 | 0.137883  | 0.89033  | 0.999883  |
| gene1189 | gene1189 | ylmH      | gi 57650036 ref NC_002951.2 :1209254-1210034 | MVR | M36C05 | OK | 88.3355 | 61.436  | -0.523909  | 0.700656  | 0.48352  | 0.999883  |
| gene119  | gene119  | deoC1     | gi 57650036 ref NC_002951.2 :138420-139083   | MVR | M36C05 | OK | 31.2947 | 37.6606 | 0.267137   | -0.387954 | 0.69805  | 0.999883  |
| gene1190 | gene1190 | SACOL1205 | gi 57650036 ref NC_002951.2 :1210057-1210675 | MVR | M36C05 | OK | 292.266 | 213.369 | -0.453933  | 0.549701  | 0.58252  | 0.999883  |
| gene1191 | gene1191 | ileS      | gi 57650036 ref NC_002951.2 :1210895-1213649 | MVR | M36C05 | OK | 69.4739 | 14.0221 | -2.30877   | 2.84825   | 0.0044   | 0.0981908 |
| gene1192 | gene1192 | SACOL1207 | gi 57650036 ref NC_002951.2 :1213938-1214736 | MVR | M36C05 | OK | 26.0775 | 26.5638 | 0.0266578  | -0.038737 | 0.9691   | 0.999883  |
| gene1193 | gene1193 | lspA      | gi 57650036 ref NC_002951.2 :1215559-1216968 | MVR | M36C05 | OK | 29.3761 | 7.94098 | -1.88726   | 1.19898   | 0.23053  | 0.899834  |
| gene1194 | gene1194 | SACOL1209 | gi 57650036 ref NC_002951.2 :1215559-1216968 | MVR | M36C05 | OK | 42.2978 | 13.2099 | -1.67897   | 2.105     | 0.03529  | 0.359216  |
| gene1195 | gene1195 | pyrR      | gi 57650036 ref NC_002951.2 :1217367-1217895 | MVR | M36C05 | OK | 92.1964 | 32.6549 | -1.49741   | 2.14071   | 0.0323   | 0.344846  |
| gene1196 | gene1196 | uraA      | gi 57650036 ref NC_002951.2 :1218112-1219420 | MVR | M36C05 | OK | 70.461  | 9.05405 | -2.96019   | 3.99196   | 6.55E-05 | 0.0040189 |
| gene1197 | gene1197 | pyrB      | gi 57650036 ref NC_002951.2 :1219447-1220329 | MVR | M36C05 | OK | 109.217 | 10.1885 | -3.42219   | 4.63047   | 3.65E-06 | 0.0003429 |
| gene1198 | gene1198 | pyrC      | gi 57650036 ref NC_002951.2 :1220346-1221621 | MVR | M36C05 | OK | 137.5   | 15.8955 | -3.11274   | 3.98763   | 6.67E-05 | 0.0040248 |
| gene1199 | gene1199 | carA      | gi 57650036 ref NC_002951.2 :1221622-1225889 | MVR | M36C05 | OK | 102.824 | 8.4439  | -3.60612   | 1.97516   | 0.04825  | 0.431092  |
| gene12   | gene12   | SACOL0013 | gi 57650036 ref NC_002951.2 :17406-18330     | MVR | M36C05 | OK | 70.672  | 66.1106 | -0.0962553 | 0.126778  | 0.89912  | 0.999883  |
| gene120  | gene120  | deoB      | gi 57650036 ref NC_002951.2 :139110-140289   | MVR | M36C05 | OK | 54.0726 | 76.692  | 0.504178   | -0.646233 | 0.51813  | 0.999883  |
| gene1200 | gene1200 | carB      | gi 57650036 ref NC_002951.2 :1221622-1225889 | MVR | M36C05 | OK | 115.479 | 8.48446 | -3.76667   | 3.91745   | 8.95E-05 | 0.005223  |
| gene1201 | gene1201 | pyrF      | gi 57650036 ref NC_002951.2 :1225998-1227302 | MVR | M36C05 | OK | 94.7395 | 9.62462 | -3.29916   | 3.70961   | 0.00021  | 0.0101505 |

|          |          |           |                                              |     |        |        |         |         |            |           |         |           |
|----------|----------|-----------|----------------------------------------------|-----|--------|--------|---------|---------|------------|-----------|---------|-----------|
| gene1202 | gene1202 | pyrE      | gi 57650036 ref NC_002951.2 :1225998-1227302 | MVR | M36C05 | OK     | 62.8205 | 3.75093 | -4.06591   | 3.00031   | 0.0027  | 0.0714957 |
| gene1203 | gene1203 | SACOL1218 | gi 57650036 ref NC_002951.2 :1227331-1227544 | MVR | M36C05 | OK     | 390.113 | 160.662 | -1.27986   | 1.87219   | 0.06118 | 0.499727  |
| gene1204 | gene1204 | SACOL1219 | gi 57650036 ref NC_002951.2 :1227980-1228382 | MVR | M36C05 | OK     | 120.393 | 126.232 | 0.0683182  | -0.096719 | 0.92295 | 0.999883  |
| gene1205 | gene1205 | SACOL1220 | gi 57650036 ref NC_002951.2 :1228644-1230342 | MVR | M36C05 | OK     | 37.7352 | 45.2498 | 0.262      | -0.336643 | 0.73639 | 0.999883  |
| gene1206 | gene1206 | gmk       | gi 57650036 ref NC_002951.2 :1230616-1231458 | MVR | M36C05 | OK     | 201.376 | 202.013 | 0.00455652 | -0.005293 | 0.99578 | 0.999883  |
| gene1207 | gene1207 | rpoZ      | gi 57650036 ref NC_002951.2 :1230616-1231458 | MVR | M36C05 | OK     | 279.507 | 185.1   | -0.594578  | 0.228701  | 0.8191  | 0.999883  |
| gene1208 | gene1208 | coaBC     | gi 57650036 ref NC_002951.2 :1231667-1235281 | MVR | M36C05 | OK     | 27.0971 | 43.5079 | 0.683136   | -0.395352 | 0.69258 | 0.999883  |
| gene1209 | gene1209 | priA      | gi 57650036 ref NC_002951.2 :1231667-1235281 | MVR | M36C05 | OK     | 46.9    | 46.0946 | -0.0249926 | 0.02518   | 0.97991 | 0.999883  |
| gene121  | gene121  | SACOL0125 | gi 57650036 ref NC_002951.2 :140419-142032   | MVR | M36C05 | OK     | 3.65446 | 2.68609 | -0.44415   | 0.478632  | 0.6322  | 0.999883  |
| gene1210 | gene1210 | SACOL1225 | gi 57650036 ref NC_002951.2 :1235786-1236740 | MVR | M36C05 | OK     | 22.4294 | 30.1298 | 0.4258     | -0.610995 | 0.5412  | 0.999883  |
| gene1211 | gene1211 | SACOL1226 | gi 57650036 ref NC_002951.2 :1236902-1237181 | MVR | M36C05 | OK     | 1505.54 | 3536.74 | 1.23214    | -1.3881   | 0.16511 | 0.797109  |
| gene1212 | gene1212 | def2      | gi 57650036 ref NC_002951.2 :1237404-1240125 | MVR | M36C05 | OK     | 45.5463 | 23.3056 | -0.966657  | 0.410456  | 0.68147 | 0.999883  |
| gene1213 | gene1213 | fmt       | gi 57650036 ref NC_002951.2 :1237404-1240125 | MVR | M36C05 | OK     | 54.6981 | 32.0662 | -0.770435  | 0.597963  | 0.54986 | 0.999883  |
| gene1214 | gene1214 | sun       | gi 57650036 ref NC_002951.2 :1237404-1240125 | MVR | M36C05 | OK     | 52.0635 | 23.2818 | -1.16107   | 1.01673   | 0.30928 | 0.992496  |
| gene1215 | gene1215 | SACOL1230 | gi 57650036 ref NC_002951.2 :1240127-1241222 | MVR | M36C05 | OK     | 49.1475 | 23.2842 | -1.07777   | 1.48683   | 0.13706 | 0.732748  |
| gene1216 | gene1216 | SACOL1231 | gi 57650036 ref NC_002951.2 :1241228-1243963 | MVR | M36C05 | OK     | 46.5493 | 15.6165 | -1.57569   | 0.782795  | 0.43375 | 0.999883  |
| gene1217 | gene1217 | SACOL1232 | gi 57650036 ref NC_002951.2 :1241228-1243963 | MVR | M36C05 | OK     | 72.8559 | 22.7169 | -1.68128   | 1.88602   | 0.05929 | 0.489282  |
| gene1218 | gene1218 | SACOL1234 | gi 57650036 ref NC_002951.2 :1244190-1245066 | MVR | M36C05 | OK     | 33.9005 | 35.2423 | 0.0559993  | -0.079494 | 0.93664 | 0.999883  |
| gene1219 | gene1219 | rpe       | gi 57650036 ref NC_002951.2 :1245066-1245711 | MVR | M36C05 | OK     | 48.8776 | 38.1948 | -0.355795  | 0.51204   | 0.60862 | 0.999883  |
| gene122  | gene122  | SACOL0126 | gi 57650036 ref NC_002951.2 :140419-142032   | MVR | M36C05 | OK     | 2.12805 | 2.20259 | 0.049665   | -0.043883 | 0.965   | 0.999883  |
| gene1220 | gene1220 | SACOL1236 | gi 57650036 ref NC_002951.2 :1245717-1246359 | MVR | M36C05 | OK     | 46.4309 | 26.4687 | -0.810796  | 1.17662   | 0.23935 | 0.9107    |
| gene1221 | gene1221 | rpmB      | gi 57650036 ref NC_002951.2 :1246739-1246928 | MVR | M36C05 | OK     | 13523.4 | 9425.67 | -0.520787  | 0.571944  | 0.56736 | 0.999883  |
| gene1222 | gene1222 | SACOL1239 | gi 57650036 ref NC_002951.2 :1247370-1247745 | MVR | M36C05 | OK     | 99.6049 | 76.7937 | -0.375229  | 0.546445  | 0.58476 | 0.999883  |
| gene1223 | gene1223 | SACOL1240 | gi 57650036 ref NC_002951.2 :1247759-1249406 | MVR | M36C05 | OK     | 108.261 | 37.705  | -1.52169   | 1.85819   | 0.06314 | 0.504373  |
| gene1224 | gene1224 | recG      | gi 57650036 ref NC_002951.2 :1249595-1251656 | MVR | M36C05 | OK     | 26.6818 | 68.9897 | 1.37053    | -1.70094  | 0.08895 | 0.597944  |
| gene1225 | gene1225 | SACOL1242 | gi 57650036 ref NC_002951.2 :1251858-1252431 | MVR | M36C05 | OK     | 74.5089 | 34.0388 | -1.13023   | 1.61911   | 0.10542 | 0.652647  |
| gene1226 | gene1226 | plsX      | gi 57650036 ref NC_002951.2 :1252435-1255068 | MVR | M36C05 | OK     | 64.0723 | 37.2723 | -0.781599  | 0.550438  | 0.58202 | 0.999883  |
| gene1227 | gene1227 | fabD      | gi 57650036 ref NC_002951.2 :1252435-1255068 | MVR | M36C05 | OK     | 58.6421 | 30.6433 | -0.936366  | 0.590633  | 0.55477 | 0.999883  |
| gene1228 | gene1228 | fabG1     | gi 57650036 ref NC_002951.2 :1252435-1255068 | MVR | M36C05 | OK     | 103.662 | 60.8374 | -0.768855  | 0.566681  | 0.57093 | 0.999883  |
| gene1229 | gene1229 | SACOL1246 | gi 57650036 ref NC_002951.2 :1255190-1255289 | MVR | M36C05 | NOTEST | 0       | 0       | 0          | 0         | 1       | 1         |
| gene123  | gene123  | SACOL0127 | gi 57650036 ref NC_002951.2 :142033-142807   | MVR | M36C05 | OK     | 2.87031 | 1.34537 | -1.09321   | 1.30404   | 0.19222 | 0.852075  |
| gene1230 | gene1230 | acpP      | gi 57650036 ref NC_002951.2 :1255310-1255544 | MVR | M36C05 | OK     | 920.482 | 298.025 | -1.62696   | 2.25835   | 0.02392 | 0.292955  |
| gene1231 | gene1231 | rnc       | gi 57650036 ref NC_002951.2 :1255659-1256391 | MVR | M36C05 | OK     | 18.5299 | 19.9098 | 0.103623   | -0.152273 | 0.87897 | 0.999883  |

|          |          |           |                                              |     |        |        |         |         |            |           |         |           |
|----------|----------|-----------|----------------------------------------------|-----|--------|--------|---------|---------|------------|-----------|---------|-----------|
| gene1232 | gene1232 | SACOL1250 | gi 57650036 ref NC_002951.2 :1256537-1261673 | MVR | M36C05 | OK     | 18.3023 | 11.4863 | -0.672111  | 0.716634  | 0.4736  | 0.999883  |
| gene1233 | gene1233 | SACOL1251 | gi 57650036 ref NC_002951.2 :1256537-1261673 | MVR | M36C05 | OK     | 27.3907 | 10.4896 | -1.38473   | 0.88939   | 0.37379 | 0.999883  |
| gene1234 | gene1234 | SACOL1252 | gi 57650036 ref NC_002951.2 :1256537-1261673 | MVR | M36C05 | OK     | 17.6157 | 8.83373 | -0.995765  | 0.19286   | 0.84707 | 0.999883  |
| gene1235 | gene1235 | ffh       | gi 57650036 ref NC_002951.2 :1261698-1263066 | MVR | M36C05 | OK     | 115.282 | 76.5424 | -0.590836  | 0.7095    | 0.47801 | 0.999883  |
| gene1236 | gene1236 | rpsP      | gi 57650036 ref NC_002951.2 :1263500-1263776 | MVR | M36C05 | OK     | 289.503 | 57.5055 | -2.33181   | 3.35306   | 0.0008  | 0.0290652 |
| gene1237 | gene1237 | rimM      | gi 57650036 ref NC_002951.2 :1263963-1265204 | MVR | M36C05 | OK     | 8.96048 | 3.26906 | -1.4547    | 1.21457   | 0.22453 | 0.89446   |
| gene1238 | gene1238 | trmD      | gi 57650036 ref NC_002951.2 :1263963-1265204 | MVR | M36C05 | OK     | 7.27998 | 4.30661 | -0.757381  | 0.87377   | 0.38224 | 0.999883  |
| gene1239 | gene1239 | rplS      | gi 57650036 ref NC_002951.2 :1265306-1265657 | MVR | M36C05 | OK     | 891.905 | 148.296 | -2.58841   | 3.3333    | 0.00086 | 0.0309008 |
| gene124  | gene124  | SACOL0128 | gi 57650036 ref NC_002951.2 :143020-143977   | MVR | M36C05 | OK     | 4.94618 | 3.49634 | -0.500472  | 0.700576  | 0.48357 | 0.999883  |
| gene1240 | gene1240 | SACOL1259 | gi 57650036 ref NC_002951.2 :1265900-1268507 | MVR | M36C05 | OK     | 7.41273 | 6.22619 | -0.251655  | 0.364774  | 0.71528 | 0.999883  |
| gene1241 | gene1241 | rbgA      | gi 57650036 ref NC_002951.2 :1268907-1270543 | MVR | M36C05 | OK     | 17.3388 | 13.364  | -0.375651  | 0.428736  | 0.66812 | 0.999883  |
| gene1242 | gene1242 | rnhB      | gi 57650036 ref NC_002951.2 :1268907-1270543 | MVR | M36C05 | OK     | 13.0051 | 9.71144 | -0.421316  | 0.375511  | 0.70728 | 0.999883  |
| gene1243 | gene1243 | sucC      | gi 57650036 ref NC_002951.2 :1270651-1271818 | MVR | M36C05 | OK     | 451.232 | 419.805 | -0.104148  | 0.109155  | 0.91308 | 0.999883  |
| gene1244 | gene1244 | sucD      | gi 57650036 ref NC_002951.2 :1271839-1272748 | MVR | M36C05 | OK     | 866.883 | 965.376 | 0.155255   | -0.159277 | 0.87345 | 0.999883  |
| gene1245 | gene1245 | lytN      | gi 57650036 ref NC_002951.2 :1272941-1274093 | MVR | M36C05 | OK     | 3.33998 | 2.08465 | -0.68004   | 0.928723  | 0.35303 | 0.999883  |
| gene1246 | gene1246 | eprH      | gi 57650036 ref NC_002951.2 :1274120-1275365 | MVR | M36C05 | OK     | 4.5824  | 1.68797 | -1.44081   | 1.97752   | 0.04798 | 0.430141  |
| gene1247 | gene1247 | SACOL1266 | gi 57650036 ref NC_002951.2 :1275537-1276410 | MVR | M36C05 | OK     | 4.32472 | 3.44163 | -0.329517  | 0.452571  | 0.65086 | 0.999883  |
| gene1248 | gene1248 | topA      | gi 57650036 ref NC_002951.2 :1276589-1278659 | MVR | M36C05 | OK     | 60.5177 | 43.7876 | -0.466834  | 0.569188  | 0.56923 | 0.999883  |
| gene1249 | gene1249 | gid       | gi 57650036 ref NC_002951.2 :1278814-1280122 | MVR | M36C05 | OK     | 81.4672 | 45.7677 | -0.831888  | 1.05627   | 0.29084 | 0.975616  |
| gene125  | gene125  | SACOL0129 | gi 57650036 ref NC_002951.2 :144205-145750   | MVR | M36C05 | OK     | 2.08089 | 2.0488  | -0.0224235 | 0.03107   | 0.97521 | 0.999883  |
| gene1250 | gene1250 | xerC      | gi 57650036 ref NC_002951.2 :1280538-1281977 | MVR | M36C05 | OK     | 83.8456 | 90.5114 | 0.110365   | -0.119512 | 0.90487 | 0.999883  |
| gene1251 | gene1251 | hslV      | gi 57650036 ref NC_002951.2 :1280538-1281977 | MVR | M36C05 | OK     | 54.9665 | 62.2284 | 0.179021   | -0.110895 | 0.9117  | 0.999883  |
| gene1252 | gene1252 | hslU      | gi 57650036 ref NC_002951.2 :1282042-1283446 | MVR | M36C05 | OK     | 94.9141 | 67.2023 | -0.498112  | 0.607656  | 0.54342 | 0.999883  |
| gene1253 | gene1253 | codY      | gi 57650036 ref NC_002951.2 :1283470-1284244 | MVR | M36C05 | OK     | 164.246 | 78.9924 | -1.05607   | 1.34581   | 0.17836 | 0.821737  |
| gene1254 | gene1254 | rpsB      | gi 57650036 ref NC_002951.2 :1284585-1285350 | MVR | M36C05 | OK     | 287.805 | 59.3596 | -2.27754   | 2.83934   | 0.00452 | 0.0991395 |
| gene1255 | gene1255 | SACOL1275 | gi 57650036 ref NC_002951.2 :1285395-1285509 | MVR | M36C05 | NOTEST | 0       | 0       | 0          | 0         | 1       | 1         |
| gene1256 | gene1256 | tsf       | gi 57650036 ref NC_002951.2 :1285543-1286425 | MVR | M36C05 | OK     | 501.029 | 432.281 | -0.212924  | 0.228816  | 0.81901 | 0.999883  |
| gene1257 | gene1257 | pyrH      | gi 57650036 ref NC_002951.2 :1286561-1287284 | MVR | M36C05 | OK     | 52.4909 | 37.9743 | -0.467044  | 0.662603  | 0.50759 | 0.999883  |
| gene1258 | gene1258 | frr       | gi 57650036 ref NC_002951.2 :1287302-1287857 | MVR | M36C05 | OK     | 75.0129 | 49.4522 | -0.601105  | 0.857795  | 0.39101 | 0.999883  |
| gene1259 | gene1259 | uppS      | gi 57650036 ref NC_002951.2 :1288229-1289000 | MVR | M36C05 | OK     | 27.0433 | 19.7071 | -0.456558  | 0.667161  | 0.50467 | 0.999883  |
| gene126  | gene126  | SACOL0130 | gi 57650036 ref NC_002951.2 :145800-147336   | MVR | M36C05 | OK     | 8.69271 | 10.6431 | 0.292038   | -0.42701  | 0.66937 | 0.999883  |
| gene1260 | gene1260 | cdsA      | gi 57650036 ref NC_002951.2 :1289006-1289789 | MVR | M36C05 | OK     | 41.9435 | 15.1379 | -1.47028   | 2.1217    | 0.03386 | 0.352611  |
| gene1261 | gene1261 | SACOL1281 | gi 57650036 ref NC_002951.2 :1290025-1291312 | MVR | M36C05 | OK     | 28.9941 | 33.2654 | 0.198259   | -0.27143  | 0.78606 | 0.999883  |

|          |          |           |                                              |     |        |        |         |         |            |           |         |           |
|----------|----------|-----------|----------------------------------------------|-----|--------|--------|---------|---------|------------|-----------|---------|-----------|
| gene1262 | gene1262 | proS      | gi 57650036 ref NC_002951.2 :1291331-1293035 | MVR | M36C05 | OK     | 41.9294 | 43.3837 | 0.0491922  | -0.062975 | 0.94979 | 0.999883  |
| gene1263 | gene1263 | polC      | gi 57650036 ref NC_002951.2 :1293298-1297609 | MVR | M36C05 | OK     | 24.6459 | 25.6216 | 0.0560117  | -0.067702 | 0.94602 | 0.999883  |
| gene1264 | gene1264 | SACOL1284 | gi 57650036 ref NC_002951.2 :1297898-1298366 | MVR | M36C05 | OK     | 37.2266 | 25.5367 | -0.54376   | 0.798485  | 0.42459 | 0.999883  |
| gene1265 | gene1265 | nusA      | gi 57650036 ref NC_002951.2 :1298386-1299562 | MVR | M36C05 | OK     | 78.2008 | 40.102  | -0.963511  | 1.25204   | 0.21056 | 0.889027  |
| gene1266 | gene1266 | SACOL1286 | gi 57650036 ref NC_002951.2 :1299582-1300181 | MVR | M36C05 | OK     | 42.8213 | 20.7581 | -1.04465   | 0.783806  | 0.43315 | 0.999883  |
| gene1267 | gene1267 | SACOL1287 | gi 57650036 ref NC_002951.2 :1299582-1300181 | MVR | M36C05 | OK     | 81.1993 | 50.7483 | -0.678108  | 0.852999  | 0.39366 | 0.999883  |
| gene1268 | gene1268 | infB      | gi 57650036 ref NC_002951.2 :1300185-1302303 | MVR | M36C05 | OK     | 125.133 | 77.1086 | -0.698497  | 0.789466  | 0.42984 | 0.999883  |
| gene1269 | gene1269 | rbfA      | gi 57650036 ref NC_002951.2 :1302688-1303039 | MVR | M36C05 | OK     | 86.7612 | 30.0891 | -1.52781   | 2.22281   | 0.02623 | 0.307643  |
| gene127  | gene127  | SACOL0132 | gi 57650036 ref NC_002951.2 :147862-148756   | MVR | M36C05 | NOTEST | 0       | 0       | 0          | 0         | 1       | 1         |
| gene1270 | gene1270 | truB      | gi 57650036 ref NC_002951.2 :1303207-1304125 | MVR | M36C05 | OK     | 9.85825 | 39.7832 | 2.01276    | -2.87322  | 0.00406 | 0.0947611 |
| gene1271 | gene1271 | ribF      | gi 57650036 ref NC_002951.2 :1304139-1305111 | MVR | M36C05 | OK     | 60.0406 | 93.5647 | 0.640025   | -0.827747 | 0.40781 | 0.999883  |
| gene1272 | gene1272 | rpsO      | gi 57650036 ref NC_002951.2 :1305225-1305495 | MVR | M36C05 | OK     | 2141.74 | 625.953 | -1.77466   | 2.17327   | 0.02976 | 0.32831   |
| gene1273 | gene1273 | pnp       | gi 57650036 ref NC_002951.2 :1305864-1307961 | MVR | M36C05 | OK     | 111.359 | 117.699 | 0.0798868  | -0.088987 | 0.92909 | 0.999883  |
| gene1274 | gene1274 | SACOL1294 | gi 57650036 ref NC_002951.2 :1308298-1309870 | MVR | M36C05 | OK     | 193.466 | 171.924 | -0.170309  | 0.18711   | 0.85158 | 0.999883  |
| gene1275 | gene1275 | SACOL1295 | gi 57650036 ref NC_002951.2 :1310116-1312495 | MVR | M36C05 | OK     | 28.5263 | 33.9345 | 0.25046    | -0.318438 | 0.75015 | 0.999883  |
| gene1276 | gene1276 | SACOL1296 | gi 57650036 ref NC_002951.2 :1312499-1313213 | MVR | M36C05 | OK     | 12.4091 | 11.8068 | -0.0717815 | 0.104915  | 0.91644 | 0.999883  |
| gene1277 | gene1277 | SACOL1297 | gi 57650036 ref NC_002951.2 :1313243-1316499 | MVR | M36C05 | OK     | 11.5058 | 5.79143 | -0.990371  | 0.897605  | 0.3694  | 0.999883  |
| gene1278 | gene1278 | SACOL1298 | gi 57650036 ref NC_002951.2 :1313243-1316499 | MVR | M36C05 | OK     | 11.8837 | 5.07094 | -1.22867   | 1.10114   | 0.27084 | 0.95425   |
| gene1279 | gene1279 | SACOL1299 | gi 57650036 ref NC_002951.2 :1313243-1316499 | MVR | M36C05 | OK     | 14.3428 | 4.15151 | -1.78862   | 1.07805   | 0.28101 | 0.965951  |
| gene128  | gene128  | SACOL0134 | gi 57650036 ref NC_002951.2 :149516-150001   | MVR | M36C05 | OK     | 0.44671 | 3.48667 | 2.96445    | -2.02507  | 0.04286 | 0.405466  |
| gene1280 | gene1280 | SACOL1300 | gi 57650036 ref NC_002951.2 :1316603-1317431 | MVR | M36C05 | OK     | 58.7624 | 80.7974 | 0.459415   | -0.613503 | 0.53954 | 0.999883  |
| gene1281 | gene1281 | SACOL1301 | gi 57650036 ref NC_002951.2 :1317449-1317842 | MVR | M36C05 | OK     | 42.6545 | 65.3893 | 0.616354   | -0.903431 | 0.3663  | 0.999883  |
| gene1282 | gene1282 | pgsA      | gi 57650036 ref NC_002951.2 :1317875-1318454 | MVR | M36C05 | OK     | 129.717 | 126.714 | -0.0337961 | 0.044662  | 0.96438 | 0.999883  |
| gene1283 | gene1283 | SACOL1303 | gi 57650036 ref NC_002951.2 :1318680-1319832 | MVR | M36C05 | OK     | 45.8145 | 52.9268 | 0.208195   | -0.275568 | 0.78288 | 0.999883  |
| gene1284 | gene1284 | recA      | gi 57650036 ref NC_002951.2 :1319996-1321040 | MVR | M36C05 | OK     | 439.234 | 453.742 | 0.0468828  | -0.049575 | 0.96046 | 0.999883  |
| gene1285 | gene1285 | SACOL1305 | gi 57650036 ref NC_002951.2 :1321393-1322953 | MVR | M36C05 | OK     | 476.648 | 921.673 | 0.951332   | -0.975447 | 0.32934 | 0.999883  |
| gene1286 | gene1286 | SACOL1306 | gi 57650036 ref NC_002951.2 :1323249-1323465 | MVR | M36C05 | OK     | 2621.91 | 2553.32 | -0.038244  | 0.046423  | 0.96297 | 0.999883  |
| gene1287 | gene1287 | SACOL1307 | gi 57650036 ref NC_002951.2 :1323638-1324436 | MVR | M36C05 | OK     | 90.0488 | 32.4669 | -1.47174   | 2.0142    | 0.04399 | 0.409179  |
| gene1288 | gene1288 | SACOL1308 | gi 57650036 ref NC_002951.2 :1324575-1326336 | MVR | M36C05 | OK     | 29.6817 | 26.689  | -0.153326  | 0.204154  | 0.83823 | 0.999883  |
| gene1289 | gene1289 | SACOL1309 | gi 57650036 ref NC_002951.2 :1326336-1327203 | MVR | M36C05 | OK     | 52.3807 | 43.4905 | -0.268335  | 0.369899  | 0.71146 | 0.999883  |
| gene129  | gene129  | SACOL0135 | gi 57650036 ref NC_002951.2 :150450-153060   | MVR | M36C05 | OK     | 1.81408 | 2.14902 | 0.24444    | -0.353318 | 0.72385 | 0.999883  |
| gene1290 | gene1290 | SACOL1310 | gi 57650036 ref NC_002951.2 :1327296-1327590 | MVR | M36C05 | OK     | 5.27671 | 3.20763 | -0.718132  | 0.668777  | 0.50364 | 0.999883  |
| gene1291 | gene1291 | miaB      | gi 57650036 ref NC_002951.2 :1327723-1329268 | MVR | M36C05 | OK     | 39.6698 | 26.7983 | -0.565899  | 0.753812  | 0.45096 | 0.999883  |

|          |          |           |                                              |     |        |        |         |         |              |              |          |          |
|----------|----------|-----------|----------------------------------------------|-----|--------|--------|---------|---------|--------------|--------------|----------|----------|
| gene1292 | gene1292 | SACOL1313 | gi 57650036 ref NC_002951.2 :1329268-1329634 | MVR | M36C05 | OK     | 52.5351 | 44.6205 | -0.235575    | 0.346116     | 0.72926  | 0.999883 |
| gene1293 | gene1293 | SACOL1314 | gi 57650036 ref NC_002951.2 :1329660-1330152 | MVR | M36C05 | OK     | 56.1411 | 25.7137 | -1.12652     | 1.6465       | 0.09966  | 0.6377   |
| gene1294 | gene1294 | hexA      | gi 57650036 ref NC_002951.2 :1330454-1333073 | MVR | M36C05 | OK     | 17.9505 | 10.7962 | -0.733501    | 1.00275      | 0.31598  | 0.999465 |
| gene1295 | gene1295 | mutL      | gi 57650036 ref NC_002951.2 :1333085-1335095 | MVR | M36C05 | OK     | 17.2259 | 7.00213 | -1.29872     | 1.8444       | 0.06513  | 0.510075 |
| gene1296 | gene1296 | glpP      | gi 57650036 ref NC_002951.2 :1335100-1335643 | MVR | M36C05 | OK     | 15.1976 | 4.82871 | -1.65413     | 2.25999      | 0.02382  | 0.292955 |
| gene1297 | gene1297 | glpF      | gi 57650036 ref NC_002951.2 :1336107-1336926 | MVR | M36C05 | OK     | 170.108 | 114.942 | -0.565552    | 0.699449     | 0.48427  | 0.999883 |
| gene1298 | gene1298 | glpK      | gi 57650036 ref NC_002951.2 :1337054-1338551 | MVR | M36C05 | OK     | 37.6276 | 18.3572 | -1.03545     | 1.41301      | 0.15765  | 0.776469 |
| gene1299 | gene1299 | glpD      | gi 57650036 ref NC_002951.2 :1338708-1340382 | MVR | M36C05 | OK     | 85.2707 | 162.637 | 0.931534     | -1.06232     | 0.28809  | 0.975616 |
| gene13   | gene13   | SACOL0014 | gi 57650036 ref NC_002951.2 :18344-20755     | MVR | M36C05 | OK     | 104.1   | 83.2798 | -0.321935    | 0.338991     | 0.73462  | 0.999883 |
| gene130  | gene130  | cap5A     | gi 57650036 ref NC_002951.2 :153404-154073   | MVR | M36C05 | OK     | 3.6785  | 262.128 | 6.15501      | -7.60612     | 2.82E-14 | 5.10E-11 |
| gene1300 | gene1300 | SACOL1322 | gi 57650036 ref NC_002951.2 :1340531-1341446 | MVR | M36C05 | OK     | 9.13941 | 10.7974 | 0.240509     | -0.352684    | 0.72433  | 0.999883 |
| gene1301 | gene1301 | miaA      | gi 57650036 ref NC_002951.2 :1341463-1342399 | MVR | M36C05 | OK     | 21.7642 | 13.7855 | -0.65881     | 0.96255      | 0.33577  | 0.999883 |
| gene1302 | gene1302 | SACOL1324 | gi 57650036 ref NC_002951.2 :1342413-1342647 | MVR | M36C05 | OK     | 39.0355 | 20.0017 | -0.964667    | 1.21315      | 0.22507  | 0.89446  |
| gene1303 | gene1303 | gpxA1     | gi 57650036 ref NC_002951.2 :1342868-1343345 | MVR | M36C05 | OK     | 109.161 | 136.705 | 0.32461      | -0.445653    | 0.65585  | 0.999883 |
| gene1304 | gene1304 | SACOL1326 | gi 57650036 ref NC_002951.2 :1343456-1344695 | MVR | M36C05 | OK     | 14.6927 | 7.21535 | -1.02596     | 1.49986      | 0.13365  | 0.7248   |
| gene1305 | gene1305 | SACOL1327 | gi 57650036 ref NC_002951.2 :1344713-1345952 | MVR | M36C05 | OK     | 20.2241 | 5.72983 | -1.81951     | 2.63081      | 0.00852  | 0.151839 |
| gene1306 | gene1306 | glnR      | gi 57650036 ref NC_002951.2 :1346194-1346563 | MVR | M36C05 | OK     | 295.223 | 169.053 | -0.804331    | 1.09247      | 0.27463  | 0.959664 |
| gene1307 | gene1307 | femC      | gi 57650036 ref NC_002951.2 :1346581-1347922 | MVR | M36C05 | OK     | 280.536 | 226.176 | -0.310735    | 0.336873     | 0.73621  | 0.999883 |
| gene1308 | gene1308 | SACOL1331 | gi 57650036 ref NC_002951.2 :1348414-1348612 | MVR | M36C05 | OK     | 0       | 3.72726 | 1.79769e+30  | 1.79769e+30  | 0.14732  | 0.743774 |
| gene1309 | gene1309 | SACOL1332 | gi 57650036 ref NC_002951.2 :1349300-1349525 | MVR | M36C05 | NOTEST | 0       | 0       | 0            | 0            | 1        | 1        |
| gene131  | gene131  | cap5B     | gi 57650036 ref NC_002951.2 :154088-154775   | MVR | M36C05 | OK     | 1.51526 | 124.852 | 6.36451      | -7.49265     | 6.75E-14 | 7.00E-11 |
| gene1310 | gene1310 | SACOL1333 | gi 57650036 ref NC_002951.2 :1349818-1350025 | MVR | M36C05 | OK     | 3.90755 | 3.09463 | -0.336498    | 0.175426     | 0.86075  | 0.999883 |
| gene1311 | gene1311 | SACOL1334 | gi 57650036 ref NC_002951.2 :1350725-1350836 | MVR | M36C05 | NOTEST | 0       | 0       | 0            | 0            | 1        | 1        |
| gene1312 | gene1312 | SACOL1335 | gi 57650036 ref NC_002951.2 :1351263-1351449 | MVR | M36C05 | OK     | 3.09916 | 0       | -1.79769e+30 | -1.79769e+30 | 0.22252  | 0.89416  |
| gene1313 | gene1313 | SACOL1336 | gi 57650036 ref NC_002951.2 :1351960-1352065 | MVR | M36C05 | NOTEST | 0       | 0       | 0            | 0            | 1        | 1        |
| gene1314 | gene1314 | SACOL1337 | gi 57650036 ref NC_002951.2 :1352097-1352193 | MVR | M36C05 | NOTEST | 0       | 0       | 0            | 0            | 1        | 1        |
| gene1315 | gene1315 | SACOL1338 | gi 57650036 ref NC_002951.2 :1352193-1352445 | MVR | M36C05 | OK     | 5.00566 | 1.59871 | -1.64666     | 1.01948      | 0.30797  | 0.991033 |
| gene1316 | gene1316 | SACOL1339 | gi 57650036 ref NC_002951.2 :1352649-1353075 | MVR | M36C05 | OK     | 0.57315 | 3.90069 | 2.76673      | -1.88172     | 0.05987  | 0.491837 |
| gene1317 | gene1317 | SACOL1340 | gi 57650036 ref NC_002951.2 :1353195-1353444 | MVR | M36C05 | OK     | 13.4858 | 18.2046 | 0.432863     | -0.504995    | 0.61356  | 0.999883 |
| gene1318 | gene1318 | SACOL1341 | gi 57650036 ref NC_002951.2 :1353573-1353675 | MVR | M36C05 | NOTEST | 0       | 0       | 0            | 0            | 1        | 1        |
| gene1319 | gene1319 | SACOL1342 | gi 57650036 ref NC_002951.2 :1353720-1353987 | MVR | M36C05 | OK     | 0.84903 | 1.36301 | 0.68291      | -0.29216     | 0.77016  | 0.999883 |
| gene132  | gene132  | cap5C     | gi 57650036 ref NC_002951.2 :154777-155542   | MVR | M36C05 | OK     | 2.05344 | 95.2877 | 5.53618      | -6.94097     | 3.89E-12 | 2.58E-09 |
| gene1320 | gene1320 | SACOL1344 | gi 57650036 ref NC_002951.2 :1354323-1354458 | MVR | M36C05 | NOTEST | 0       | 0       | 0            | 0            | 1        | 1        |



|          |          |           |                                              |     |        |        |         |         |            |           |          |           |
|----------|----------|-----------|----------------------------------------------|-----|--------|--------|---------|---------|------------|-----------|----------|-----------|
| gene1321 | gene1321 | SACOL1345 | gi 57650036 ref NC_002951.2 :1354548-1354839 | MVR | M36C05 | OK     | 16.2433 | 5.47979 | -1.56765   | 1.76611   | 0.07738  | 0.552795  |
| gene1322 | gene1322 | SACOL1346 | gi 57650036 ref NC_002951.2 :1354849-1355044 | MVR | M36C05 | OK     | 25.0546 | 11.9653 | -1.06622   | 1.01892   | 0.30824  | 0.991033  |
| gene1323 | gene1323 | SACOL1347 | gi 57650036 ref NC_002951.2 :1355093-1355435 | MVR | M36C05 | OK     | 6.44294 | 18.181  | 1.49664    | -1.8519   | 0.06404  | 0.507066  |
| gene1324 | gene1324 | SACOL1348 | gi 57650036 ref NC_002951.2 :1355441-1355633 | MVR | M36C05 | OK     | 2.68265 | 4.28023 | 0.674028   | -0.28836  | 0.77307  | 0.999883  |
| gene1325 | gene1325 | SACOL1349 | gi 57650036 ref NC_002951.2 :1356181-1357207 | MVR | M36C05 | OK     | 2.62497 | 3.87146 | 0.560575   | -0.769789 | 0.44143  | 0.999883  |
| gene1326 | gene1326 | SACOL1350 | gi 57650036 ref NC_002951.2 :1357476-1357674 | MVR | M36C05 | OK     | 65.6898 | 26.0908 | -1.33213   | 1.59297   | 0.11117  | 0.662157  |
| gene1327 | gene1327 | cls1      | gi 57650036 ref NC_002951.2 :1357731-1359213 | MVR | M36C05 | OK     | 33.706  | 20.1198 | -0.744392  | 1.01897   | 0.30822  | 0.991033  |
| gene1328 | gene1328 | SACOL1352 | gi 57650036 ref NC_002951.2 :1359387-1360996 | MVR | M36C05 | OK     | 2.81705 | 6.06666 | 1.10672    | -1.11249  | 0.26593  | 0.948966  |
| gene1329 | gene1329 | SACOL1353 | gi 57650036 ref NC_002951.2 :1359387-1360996 | MVR | M36C05 | OK     | 4.83388 | 7.25877 | 0.586543   | -0.61027  | 0.54168  | 0.999883  |
| gene133  | gene133  | cap5D     | gi 57650036 ref NC_002951.2 :155561-158403   | MVR | M36C05 | OK     | 1.75466 | 85.9854 | 5.61483    | -5.86407  | 4.52E-09 | 1.13E-06  |
| gene1330 | gene1330 | SACOL1354 | gi 57650036 ref NC_002951.2 :1360999-1362690 | MVR | M36C05 | OK     | 13.0704 | 12.4847 | -0.0661402 | 0.070602  | 0.94371  | 0.999883  |
| gene1331 | gene1331 | SACOL1355 | gi 57650036 ref NC_002951.2 :1360999-1362690 | MVR | M36C05 | OK     | 25.1377 | 21.0917 | -0.253174  | 0.241781  | 0.80895  | 0.999883  |
| gene1332 | gene1332 | SACOL1356 | gi 57650036 ref NC_002951.2 :1362962-1363070 | MVR | M36C05 | NOTEST | 0       | 0       | 0          | 0         | 1        | 1         |
| gene1333 | gene1333 | SACOL1357 | gi 57650036 ref NC_002951.2 :1363129-1363663 | MVR | M36C05 | OK     | 12.0566 | 5.62014 | -1.10115   | 1.50857   | 0.13141  | 0.718382  |
| gene1334 | gene1334 | SACOL1358 | gi 57650036 ref NC_002951.2 :1363805-1364660 | MVR | M36C05 | OK     | 56.6198 | 113.331 | 1.00116    | -1.30708  | 0.19119  | 0.851696  |
| gene1335 | gene1335 | SACOL1359 | gi 57650036 ref NC_002951.2 :1364975-1365566 | MVR | M36C05 | OK     | 175.652 | 97.9724 | -0.842273  | 1.10548   | 0.26895  | 0.952424  |
| gene1336 | gene1336 | SACOL1360 | gi 57650036 ref NC_002951.2 :1365619-1367002 | MVR | M36C05 | OK     | 46.2226 | 85.8213 | 0.892737   | -1.12042  | 0.26254  | 0.944538  |
| gene1337 | gene1337 | SACOL1361 | gi 57650036 ref NC_002951.2 :1367007-1367115 | MVR | M36C05 | NOTEST | 0       | 0       | 0          | 0         | 1        | 1         |
| gene1338 | gene1338 | hom       | gi 57650036 ref NC_002951.2 :1367192-1368473 | MVR | M36C05 | OK     | 211.525 | 541.831 | 1.35702    | -1.44788  | 0.14765  | 0.744632  |
| gene1339 | gene1339 | thrC      | gi 57650036 ref NC_002951.2 :1368478-1369540 | MVR | M36C05 | OK     | 328.615 | 717.106 | 1.12579    | -1.18864  | 0.23458  | 0.903063  |
| gene134  | gene134  | cap5E     | gi 57650036 ref NC_002951.2 :155561-158403   | MVR | M36C05 | OK     | 2.17933 | 57.9945 | 4.73396    | -3.22461  | 0.00126  | 0.040574  |
| gene1340 | gene1340 | thrB      | gi 57650036 ref NC_002951.2 :1369541-1370456 | MVR | M36C05 | OK     | 195.059 | 359.245 | 0.881057   | -0.996531 | 0.31899  | 0.999883  |
| gene1341 | gene1341 | SACOL1365 | gi 57650036 ref NC_002951.2 :1370513-1371317 | MVR | M36C05 | OK     | 328.949 | 537.862 | 0.709373   | -0.778947 | 0.43601  | 0.999883  |
| gene1342 | gene1342 | SACOL1366 | gi 57650036 ref NC_002951.2 :1371609-1371924 | MVR | M36C05 | OK     | 126.522 | 106.44  | -0.249356  | 0.364467  | 0.71551  | 0.999883  |
| gene1343 | gene1343 | SACOL1367 | gi 57650036 ref NC_002951.2 :1372141-1373596 | MVR | M36C05 | OK     | 27.7937 | 83.9684 | 1.59509    | -2.03866  | 0.04148  | 0.396065  |
| gene1344 | gene1344 | kataA     | gi 57650036 ref NC_002951.2 :1373895-1375317 | MVR | M36C05 | OK     | 469.834 | 2052.29 | 2.12701    | -2.22509  | 0.02608  | 0.306341  |
| gene1345 | gene1345 | rpmG      | gi 57650036 ref NC_002951.2 :1375407-1375557 | MVR | M36C05 | OK     | 429.349 | 785.21  | 0.870928   | -1.22053  | 0.22226  | 0.89416   |
| gene1346 | gene1346 | rpsN      | gi 57650036 ref NC_002951.2 :1376010-1376280 | MVR | M36C05 | OK     | 13.9983 | 26.4674 | 0.918961   | -1.15572  | 0.2478   | 0.922459  |
| gene1347 | gene1347 | guaC      | gi 57650036 ref NC_002951.2 :1376436-1377515 | MVR | M36C05 | OK     | 20.8626 | 3.96883 | -2.39413   | 3.41127   | 0.00065  | 0.0247597 |
| gene1348 | gene1348 | SACOL1372 | gi 57650036 ref NC_002951.2 :1376436-1377515 | MVR | M36C05 | NOTEST | 0       | 0       | 0          | 0         | 1        | 1         |
| gene1349 | gene1349 | SACOL1373 | gi 57650036 ref NC_002951.2 :1377588-1378452 | MVR | M36C05 | OK     | 22.3844 | 13.7872 | -0.69916   | 1.02345   | 0.30609  | 0.991033  |
| gene135  | gene135  | cap5F     | gi 57650036 ref NC_002951.2 :158415-159525   | MVR | M36C05 | OK     | 2.83821 | 47.6174 | 4.06843    | -5.49995  | 3.80E-08 | 7.43E-06  |
| gene1350 | gene1350 | lexA      | gi 57650036 ref NC_002951.2 :1378831-1379455 | MVR | M36C05 | OK     | 607.783 | 762.497 | 0.327175   | -0.355183 | 0.72245  | 0.999883  |

|          |          |           |                                              |     |        |        |         |         |           |           |          |           |
|----------|----------|-----------|----------------------------------------------|-----|--------|--------|---------|---------|-----------|-----------|----------|-----------|
| gene1351 | gene1351 | SACOL1375 | gi 57650036 ref NC_002951.2 :1379597-1379831 | MVR | M36C05 | OK     | 180.067 | 104.009 | -0.791831 | 1.15961   | 0.24621  | 0.920358  |
| gene1352 | gene1352 | SACOL1376 | gi 57650036 ref NC_002951.2 :1379966-1380206 | MVR | M36C05 | OK     | 46.4522 | 31.4104 | -0.564505 | 0.756822  | 0.44916  | 0.999883  |
| gene1353 | gene1353 | tkf       | gi 57650036 ref NC_002951.2 :1380326-1382315 | MVR | M36C05 | OK     | 237.769 | 354.772 | 0.577335  | -0.598377 | 0.54959  | 0.999883  |
| gene1354 | gene1354 | SACOL1378 | gi 57650036 ref NC_002951.2 :1382592-1382920 | MVR | M36C05 | OK     | 463.645 | 80.0577 | -2.53391  | 3.62326   | 0.00029  | 0.0131134 |
| gene1355 | gene1355 | SACOL1379 | gi 57650036 ref NC_002951.2 :1382592-1382920 | MVR | M36C05 | NOTEST | 0       | 0       | 0         | 0         | 1        | 1         |
| gene1356 | gene1356 | SACOL1380 | gi 57650036 ref NC_002951.2 :1383013-1383481 | MVR | M36C05 | OK     | 44.3855 | 12.3565 | -1.84482  | 2.65307   | 0.00798  | 0.14471   |
| gene1357 | gene1357 | sbcD      | gi 57650036 ref NC_002951.2 :1383604-1384726 | MVR | M36C05 | OK     | 7.35893 | 3.34839 | -1.13603  | 1.62697   | 0.10374  | 0.645527  |
| gene1358 | gene1358 | sbcC      | gi 57650036 ref NC_002951.2 :1384729-1387759 | MVR | M36C05 | OK     | 10.9231 | 3.73784 | -1.54711  | 2.20159   | 0.02769  | 0.315942  |
| gene1359 | gene1359 | mscL      | gi 57650036 ref NC_002951.2 :1387829-1388192 | MVR | M36C05 | OK     | 672.616 | 1270.2  | 0.917204  | -1.06723  | 0.28587  | 0.973566  |
| gene136  | gene136  | cap5G     | gi 57650036 ref NC_002951.2 :159528-160653   | MVR | M36C05 | OK     | 2.9857  | 38.3815 | 3.68427   | -5.05219  | 4.37E-07 | 5.85E-05  |
| gene1360 | gene1360 | opuD1     | gi 57650036 ref NC_002951.2 :1388395-1390042 | MVR | M36C05 | OK     | 207.891 | 23.7656 | -3.12888  | 3.74773   | 0.00018  | 0.0092341 |
| gene1361 | gene1361 | acnA      | gi 57650036 ref NC_002951.2 :1390933-1393639 | MVR | M36C05 | OK     | 220.559 | 752.31  | 1.77016   | -1.83659  | 0.06627  | 0.515048  |
| gene1362 | gene1362 | SACOL1386 | gi 57650036 ref NC_002951.2 :1393818-1394286 | MVR | M36C05 | OK     | 75.8849 | 89.7903 | 0.242747  | -0.346431 | 0.72902  | 0.999883  |
| gene1363 | gene1363 | SACOL1387 | gi 57650036 ref NC_002951.2 :1394492-1394789 | MVR | M36C05 | OK     | 78.4592 | 174.279 | 1.15138   | -1.67449  | 0.09403  | 0.615302  |
| gene1364 | gene1364 | SACOL1388 | gi 57650036 ref NC_002951.2 :1395164-1395773 | MVR | M36C05 | OK     | 208.298 | 138.185 | -0.592044 | 0.752355  | 0.45184  | 0.999883  |
| gene1365 | gene1365 | parE      | gi 57650036 ref NC_002951.2 :1395972-1400372 | MVR | M36C05 | OK     | 54.7638 | 34.2024 | -0.679126 | 0.541583  | 0.58811  | 0.999883  |
| gene1366 | gene1366 | parC      | gi 57650036 ref NC_002951.2 :1395972-1400372 | MVR | M36C05 | OK     | 54.5452 | 25.5111 | -1.09633  | 0.90348   | 0.36627  | 0.999883  |
| gene1367 | gene1367 | SACOL1392 | gi 57650036 ref NC_002951.2 :1400621-1402097 | MVR | M36C05 | OK     | 68.5759 | 21.7694 | -1.6554   | 2.16563   | 0.03034  | 0.33167   |
| gene1368 | gene1368 | SACOL1393 | gi 57650036 ref NC_002951.2 :1402581-1404776 | MVR | M36C05 | OK     | 22.6257 | 41.1089 | 0.861489  | -0.367813 | 0.71301  | 0.999883  |
| gene1369 | gene1369 | SACOL1394 | gi 57650036 ref NC_002951.2 :1402581-1404776 | MVR | M36C05 | OK     | 62.3313 | 143.672 | 1.20475   | -0.126084 | 0.89967  | 0.999883  |
| gene137  | gene137  | cap5H     | gi 57650036 ref NC_002951.2 :160655-161282   | MVR | M36C05 | NOTEST | 0       | 0       | 0         | 0         | 1        | 1         |
| gene1370 | gene1370 | SACOL1395 | gi 57650036 ref NC_002951.2 :1402581-1404776 | MVR | M36C05 | OK     | 78.3128 | 190.013 | 1.27878   | -1.3769   | 0.16854  | 0.808072  |
| gene1371 | gene1371 | fmtC      | gi 57650036 ref NC_002951.2 :1405256-1407779 | MVR | M36C05 | OK     | 223.026 | 344.676 | 0.628029  | -0.645618 | 0.51853  | 0.999883  |
| gene1372 | gene1372 | msrA      | gi 57650036 ref NC_002951.2 :1407981-1408491 | MVR | M36C05 | OK     | 25.9151 | 63.4037 | 1.29077   | -1.87428  | 0.06089  | 0.498497  |
| gene1373 | gene1373 | SACOL1398 | gi 57650036 ref NC_002951.2 :1408627-1409611 | MVR | M36C05 | OK     | 28.777  | 16.457  | -0.806218 | 1.16361   | 0.24458  | 0.918242  |
| gene1374 | gene1374 | dmpI      | gi 57650036 ref NC_002951.2 :1409698-1409884 | MVR | M36C05 | OK     | 142.561 | 104.259 | -0.451416 | 0.618646  | 0.53615  | 0.999883  |
| gene1375 | gene1375 | SACOL1400 | gi 57650036 ref NC_002951.2 :1410031-1411294 | MVR | M36C05 | OK     | 46.1561 | 68.6563 | 0.572872  | -0.738139 | 0.46043  | 0.999883  |
| gene1376 | gene1376 | tyrA      | gi 57650036 ref NC_002951.2 :1411430-1412522 | MVR | M36C05 | OK     | 46.9592 | 59.0862 | 0.331413  | -0.438577 | 0.66097  | 0.999883  |
| gene1377 | gene1377 | SACOL1402 | gi 57650036 ref NC_002951.2 :1412686-1413718 | MVR | M36C05 | OK     | 61.9527 | 55.1345 | -0.168212 | 0.221879  | 0.82441  | 0.999883  |
| gene1378 | gene1378 | trpE      | gi 57650036 ref NC_002951.2 :1414209-1416179 | MVR | M36C05 | OK     | 1.33482 | 2.83118 | 1.08476   | -1.36129  | 0.17342  | 0.821477  |
| gene1379 | gene1379 | trpG      | gi 57650036 ref NC_002951.2 :1414209-1416179 | MVR | M36C05 | OK     | 0.85177 | 1.80502 | 1.08348   | -0.579835 | 0.56203  | 0.999883  |
| gene138  | gene138  | cap5I     | gi 57650036 ref NC_002951.2 :161286-162396   | MVR | M36C05 | NOTEST | 0       | 0       | 0         | 0         | 1        | 1         |
| gene1380 | gene1380 | trpD      | gi 57650036 ref NC_002951.2 :1416184-1417183 | MVR | M36C05 | OK     | 0.98092 | 2.76029 | 1.49262   | -1.81269  | 0.06988  | 0.522414  |

|          |          |           |                                              |     |        |        |         |         |                               |           |         |           |
|----------|----------|-----------|----------------------------------------------|-----|--------|--------|---------|---------|-------------------------------|-----------|---------|-----------|
| gene1381 | gene1381 | trpC      | gi 57650036 ref NC_002951.2 :1417184-1420527 | MVR | M36C05 | OK     | 2.19654 | 3.59526 | 0.710862                      | -0.481222 | 0.63036 | 0.999883  |
| gene1382 | gene1382 | trpF      | gi 57650036 ref NC_002951.2 :1417184-1420527 | MVR | M36C05 | OK     | 1.84452 | 2.53148 | 0.456735                      | -0.23373  | 0.8152  | 0.999883  |
| gene1383 | gene1383 | trpB      | gi 57650036 ref NC_002951.2 :1417184-1420527 | MVR | M36C05 | OK     | 1.71139 | 2.93272 | 0.777068                      | -0.622264 | 0.53377 | 0.999883  |
| gene1384 | gene1384 | trpA      | gi 57650036 ref NC_002951.2 :1417184-1420527 | MVR | M36C05 | OK     | 5.20991 | 5.00572 | -0.0576823                    | 0.049925  | 0.96018 | 0.999883  |
| gene1385 | gene1385 | femA      | gi 57650036 ref NC_002951.2 :1420809-1422111 | MVR | M36C05 | OK     | 95.4835 | 161.36  | 0.75696                       | -0.886285 | 0.37546 | 0.999883  |
| gene1386 | gene1386 | SACOL1411 | gi 57650036 ref NC_002951.2 :1422129-1423389 | MVR | M36C05 | OK     | 182.731 | 184.399 | 0.0131102                     | -0.014775 | 0.98821 | 0.999883  |
| gene1387 | gene1387 | SACOL1412 | gi 57650036 ref NC_002951.2 :1424071-1424839 | MVR | M36C05 | OK     | 6.87871 | 3.30189 | -1.05885                      | 1.45062   | 0.14689 | 0.743774  |
| gene1388 | gene1388 | SACOL1413 | gi 57650036 ref NC_002951.2 :1424886-1425360 | MVR | M36C05 | OK     | 63.8453 | 162.37  | 1.34664                       | -1.86629  | 0.062   | 0.503596  |
| gene1389 | gene1389 | SACOL1414 | gi 57650036 ref NC_002951.2 :1425483-1428747 | MVR | M36C05 | OK     | 10.1519 | 12.5291 | 0.303538                      | -0.300202 | 0.76402 | 0.999883  |
| gene139  | gene139  | cap5J     | gi 57650036 ref NC_002951.2 :162409-164774   | MVR | M36C05 | NOTEST | 0       | 0       | 0                             | 0         | 1       | 1         |
| gene1390 | gene1390 | SACOL1415 | gi 57650036 ref NC_002951.2 :1425483-1428747 | MVR | M36C05 | OK     | 2.33877 | 6.72684 | 1.52418                       | -0.93109  | 0.35181 | 0.999883  |
| gene1391 | gene1391 | SACOL1416 | gi 57650036 ref NC_002951.2 :1425483-1428747 | MVR | M36C05 | OK     | 2.98622 | 1.39848 | -1.09446                      | 0.479798  | 0.63137 | 0.999883  |
| gene1392 | gene1392 | SACOL1417 | gi 57650036 ref NC_002951.2 :1425483-1428747 | MVR | M36C05 | OK     | 2.52917 | 4.624   | 0.870478                      | -0.595578 | 0.55146 | 0.999883  |
| gene1393 | gene1393 | SACOL1418 | gi 57650036 ref NC_002951.2 :1429050-1429395 | MVR | M36C05 | OK     | 23.9096 | 22.3011 | -0.100473                     | 0.14126   | 0.88766 | 0.999883  |
| gene1394 | gene1394 | SACOL1419 | gi 57650036 ref NC_002951.2 :1429599-1431414 | MVR | M36C05 | OK     | 37.9385 | 103.731 | 1.45111                       | -1.75464  | 0.07932 | 0.560274  |
| gene1395 | gene1395 | SACOL1420 | gi 57650036 ref NC_002951.2 :1431553-1432195 | MVR | M36C05 | OK     | 4.33542 | 3.24617 | -0.417434                     | 0.538724  | 0.59008 | 0.999883  |
| gene1396 | gene1396 | SACOL1421 | gi 57650036 ref NC_002951.2 :1432201-1433053 | MVR | M36C05 | OK     | 4.09683 | 3.89097 | -0.0743808                    | 0.102238  | 0.91857 | 0.999883  |
| gene1397 | gene1397 | SACOL1422 | gi 57650036 ref NC_002951.2 :1433099-1434017 | MVR | M36C05 | OK     | 3.79163 | 5.37611 | 0.503743                      | -0.70656  | 0.47984 | 0.999883  |
| gene1398 | gene1398 | SACOL1423 | gi 57650036 ref NC_002951.2 :1434018-1434945 | MVR | M36C05 | OK     | 2.91131 | 3.48908 | 0.261181                      | -0.353957 | 0.72337 | 0.999883  |
| gene1399 | gene1399 | SACOL1424 | gi 57650036 ref NC_002951.2 :1435135-1436119 | MVR | M36C05 | OK     | 12.6188 | 14.0658 | 0.156616                      | -0.230058 | 0.81805 | 0.999883  |
| gene14   | gene14   | rplI      | gi 57650036 ref NC_002951.2 :18344-20755     | MVR | M36C05 | OK     | 88.8435 | 72.3559 | -0.296155                     | 0.107848  | 0.91412 | 0.999883  |
| gene140  | gene140  | cap5K     | gi 57650036 ref NC_002951.2 :162409-164774   | MVR | M36C05 | NOTEST | 0       | 0       | 0                             | 0         | 1       | 1         |
| gene1400 | gene1400 | SACOL1425 | gi 57650036 ref NC_002951.2 :1436658-1436955 | MVR | M36C05 | NOTEST | 0.64311 | 0       | -1.79769e+3(-1.79769e+0.22252 |           | 1       |           |
| gene1401 | gene1401 | SACOL1426 | gi 57650036 ref NC_002951.2 :1437090-1437993 | MVR | M36C05 | OK     | 163.11  | 112.957 | -0.53007                      | 0.647806  | 0.51711 | 0.999883  |
| gene1402 | gene1402 | SACOL1427 | gi 57650036 ref NC_002951.2 :1438139-1439741 | MVR | M36C05 | OK     | 29.9225 | 9.51279 | -1.65329                      | 2.30794   | 0.021   | 0.271422  |
| gene1403 | gene1403 | lysC      | gi 57650036 ref NC_002951.2 :1440600-1441806 | MVR | M36C05 | OK     | 8.5758  | 10.192  | 0.249098                      | -0.366138 | 0.71426 | 0.999883  |
| gene1404 | gene1404 | asd       | gi 57650036 ref NC_002951.2 :1441869-1442859 | MVR | M36C05 | OK     | 38.7815 | 71.7486 | 0.887582                      | -1.18854  | 0.23462 | 0.903063  |
| gene1405 | gene1405 | dapA      | gi 57650036 ref NC_002951.2 :1442860-1444467 | MVR | M36C05 | OK     | 35.93   | 81.1165 | 1.17481                       | -1.19356  | 0.23265 | 0.902162  |
| gene1406 | gene1406 | dapB      | gi 57650036 ref NC_002951.2 :1442860-1444467 | MVR | M36C05 | OK     | 33.5098 | 55.4846 | 0.727506                      | -0.57003  | 0.56866 | 0.999883  |
| gene1407 | gene1407 | dapD      | gi 57650036 ref NC_002951.2 :1444493-1445213 | MVR | M36C05 | OK     | 80.0374 | 106.73  | 0.415223                      | -0.54871  | 0.5832  | 0.999883  |
| gene1408 | gene1408 | SACOL1433 | gi 57650036 ref NC_002951.2 :1445355-1446507 | MVR | M36C05 | OK     | 21.6784 | 18.5302 | -0.226381                     | 0.325755  | 0.74461 | 0.999883  |
| gene1409 | gene1409 | SACOL1434 | gi 57650036 ref NC_002951.2 :1446511-1448852 | MVR | M36C05 | OK     | 11.7367 | 12.9427 | 0.141115                      | -0.079305 | 0.93679 | 0.999883  |
| gene141  | gene141  | cap5L     | gi 57650036 ref NC_002951.2 :164774-165980   | MVR | M36C05 | OK     | 2.67994 | 11.6167 | 2.11593                       | -3.00583  | 0.00265 | 0.0711263 |

|          |          |           |                                              |     |        |        |         |         |            |           |         |           |
|----------|----------|-----------|----------------------------------------------|-----|--------|--------|---------|---------|------------|-----------|---------|-----------|
| gene1410 | gene1410 | lysA      | gi 57650036 ref NC_002951.2 :1446511-1448852 | MVR | M36C05 | OK     | 44.0027 | 44.0562 | 0.00175416 | -0.002047 | 0.99837 | 0.999883  |
| gene1411 | gene1411 | SACOL1436 | gi 57650036 ref NC_002951.2 :1449091-1449493 | MVR | M36C05 | NOTEST | 0       | 0       | 0          | 0         | 1       | 1         |
| gene1412 | gene1412 | SACOL1437 | gi 57650036 ref NC_002951.2 :1449689-1449890 | MVR | M36C05 | OK     | 3893.23 | 1551.04 | -1.32774   | 1.67132   | 0.09466 | 0.617151  |
| gene1413 | gene1413 | SACOL1438 | gi 57650036 ref NC_002951.2 :1450060-1450369 | MVR | M36C05 | OK     | 66.5397 | 88.432  | 0.410355   | -0.602149 | 0.54708 | 0.999883  |
| gene1414 | gene1414 | SACOL1439 | gi 57650036 ref NC_002951.2 :1450531-1450801 | MVR | M36C05 | OK     | 194.33  | 397.011 | 1.03067    | -1.45616  | 0.14535 | 0.743774  |
| gene1415 | gene1415 | SACOL1440 | gi 57650036 ref NC_002951.2 :1450819-1451449 | MVR | M36C05 | OK     | 83.9405 | 170.184 | 1.01965    | -1.33551  | 0.18171 | 0.829614  |
| gene1416 | gene1416 | SACOL1441 | gi 57650036 ref NC_002951.2 :1451480-1452617 | MVR | M36C05 | OK     | 126.506 | 236.045 | 0.899855   | -1.03445  | 0.30093 | 0.984985  |
| gene1417 | gene1417 | SACOL1442 | gi 57650036 ref NC_002951.2 :1452884-1453277 | MVR | M36C05 | OK     | 1.01558 | 1.70581 | 0.748144   | -0.553842 | 0.57969 | 0.999883  |
| gene1418 | gene1418 | brnQ3     | gi 57650036 ref NC_002951.2 :1453629-1454973 | MVR | M36C05 | OK     | 8.6682  | 4.23992 | -1.0317    | 1.50501   | 0.13232 | 0.721045  |
| gene1419 | gene1419 | SACOL1444 | gi 57650036 ref NC_002951.2 :1455197-1457084 | MVR | M36C05 | OK     | 6.99897 | 8.55819 | 0.290163   | -0.42406  | 0.67152 | 0.999883  |
| gene142  | gene142  | cap5M     | gi 57650036 ref NC_002951.2 :165990-167435   | MVR | M36C05 | OK     | 2.274   | 10.7944 | 2.24697    | -1.63908  | 0.1012  | 0.639058  |
| gene1420 | gene1420 | SACOL1445 | gi 57650036 ref NC_002951.2 :1457097-1457889 | MVR | M36C05 | OK     | 12.5588 | 17.3299 | 0.464571   | -0.682216 | 0.4951  | 0.999883  |
| gene1421 | gene1421 | SACOL1446 | gi 57650036 ref NC_002951.2 :1458069-1458273 | MVR | M36C05 | OK     | 111.871 | 124.765 | 0.157374   | -0.223414 | 0.82321 | 0.999883  |
| gene1422 | gene1422 | SACOL1447 | gi 57650036 ref NC_002951.2 :1458301-1459111 | MVR | M36C05 | OK     | 119.337 | 149.914 | 0.329091   | -0.410018 | 0.68179 | 0.999883  |
| gene1423 | gene1423 | sucB      | gi 57650036 ref NC_002951.2 :1459690-1460959 | MVR | M36C05 | OK     | 230.071 | 411.068 | 0.837296   | -0.897434 | 0.36949 | 0.999883  |
| gene1424 | gene1424 | sucA      | gi 57650036 ref NC_002951.2 :1460972-1463771 | MVR | M36C05 | OK     | 197.783 | 375.05  | 0.923159   | -0.949198 | 0.34252 | 0.999883  |
| gene1425 | gene1425 | arlS      | gi 57650036 ref NC_002951.2 :1464054-1466066 | MVR | M36C05 | OK     | 9.04131 | 34.902  | 1.94871    | -1.80576  | 0.07096 | 0.522414  |
| gene1426 | gene1426 | arlR      | gi 57650036 ref NC_002951.2 :1464054-1466066 | MVR | M36C05 | OK     | 13.2744 | 119.478 | 3.17003    | -2.84623  | 0.00442 | 0.0985117 |
| gene1427 | gene1427 | SACOL1452 | gi 57650036 ref NC_002951.2 :1466853-1467468 | MVR | M36C05 | OK     | 30.796  | 44.9512 | 0.545618   | -0.792507 | 0.42807 | 0.999883  |
| gene1428 | gene1428 | murG      | gi 57650036 ref NC_002951.2 :1467484-1468555 | MVR | M36C05 | OK     | 20.5058 | 20.0019 | -0.0358945 | 0.05188   | 0.95862 | 0.999883  |
| gene1429 | gene1429 | SACOL1454 | gi 57650036 ref NC_002951.2 :1468566-1469077 | MVR | M36C05 | OK     | 8.33744 | 9.23144 | 0.146951   | -0.20247  | 0.83955 | 0.999883  |
| gene143  | gene143  | cap5N     | gi 57650036 ref NC_002951.2 :165990-167435   | MVR | M36C05 | OK     | 4.22706 | 10.901  | 1.36674    | -1.67188  | 0.09455 | 0.61699   |
| gene1430 | gene1430 | SACOL1455 | gi 57650036 ref NC_002951.2 :1469476-1470967 | MVR | M36C05 | OK     | 33.1435 | 42.2642 | 0.350708   | -0.462554 | 0.64368 | 0.999883  |
| gene1431 | gene1431 | SACOL1456 | gi 57650036 ref NC_002951.2 :1471158-1471880 | MVR | M36C05 | OK     | 212.143 | 293.234 | 0.467017   | -0.289505 | 0.7722  | 0.999883  |
| gene1432 | gene1432 | SACOL1457 | gi 57650036 ref NC_002951.2 :1471158-1471880 | MVR | M36C05 | OK     | 87.616  | 181.223 | 1.0485     | -1.21707  | 0.22358 | 0.89446   |
| gene1433 | gene1433 | SACOL1459 | gi 57650036 ref NC_002951.2 :1471891-1473771 | MVR | M36C05 | OK     | 86.1333 | 172.73  | 1.00387    | -1.01998  | 0.30774 | 0.991033  |
| gene1434 | gene1434 | SACOL1460 | gi 57650036 ref NC_002951.2 :1471891-1473771 | MVR | M36C05 | OK     | 39.1082 | 73.7652 | 0.915469   | -0.526813 | 0.59832 | 0.999883  |
| gene1435 | gene1435 | folA      | gi 57650036 ref NC_002951.2 :1473785-1474265 | MVR | M36C05 | OK     | 48.033  | 111.982 | 1.22117    | -1.73327  | 0.08305 | 0.574038  |
| gene1436 | gene1436 | thyA      | gi 57650036 ref NC_002951.2 :1474464-1475421 | MVR | M36C05 | OK     | 20.1836 | 55.5043 | 1.45942    | -2.0319   | 0.04216 | 0.400763  |
| gene1437 | gene1437 | SACOL1464 | gi 57650036 ref NC_002951.2 :1475844-1476282 | MVR | M36C05 | OK     | 122.282 | 113.983 | -0.101396  | 0.14199   | 0.88709 | 0.999883  |
| gene1438 | gene1438 | SACOL1465 | gi 57650036 ref NC_002951.2 :1476297-1477422 | MVR | M36C05 | OK     | 60.6875 | 94.5234 | 0.639272   | -0.809286 | 0.41835 | 0.999883  |
| gene1439 | gene1439 | SACOL1466 | gi 57650036 ref NC_002951.2 :1477459-1477711 | MVR | M36C05 | OK     | 50.0566 | 75.1392 | 0.586004   | -0.83355  | 0.40454 | 0.999883  |
| gene144  | gene144  | cap5O     | gi 57650036 ref NC_002951.2 :167488-168751   | MVR | M36C05 | OK     | 3.88386 | 10.8896 | 1.48739    | -2.15495  | 0.03117 | 0.337139  |

|          |          |           |                                              |     |        |        |         |         |           |           |         |          |
|----------|----------|-----------|----------------------------------------------|-----|--------|--------|---------|---------|-----------|-----------|---------|----------|
| gene1440 | gene1440 | SACOL1467 | gi 57650036 ref NC_002951.2 :1477722-1477917 | MVR | M36C05 | OK     | 25.0546 | 75.7799 | 1.59674   | -1.85929  | 0.06299 | 0.504373 |
| gene1441 | gene1441 | SACOL1468 | gi 57650036 ref NC_002951.2 :1478161-1478866 | MVR | M36C05 | OK     | 4.98352 | 2.84051 | -0.811015 | 1.06501   | 0.28687 | 0.975155 |
| gene1442 | gene1442 | SACOL1469 | gi 57650036 ref NC_002951.2 :1478930-1479062 | MVR | M36C05 | OK     | 217.965 | 318.311 | 0.546337  | -0.548847 | 0.58311 | 0.999883 |
| gene1443 | gene1443 | SACOL1471 | gi 57650036 ref NC_002951.2 :1479406-1479808 | MVR | M36C05 | OK     | 3.87325 | 2.72051 | -0.509665 | 0.539052  | 0.58985 | 0.999883 |
| gene1444 | gene1444 | ebh       | gi 57650036 ref NC_002951.2 :1479866-1511363 | MVR | M36C05 | OK     | 2.35691 | 3.44937 | 0.549438  | -0.675384 | 0.49943 | 0.999883 |
| gene1445 | gene1445 | SACOL1475 | gi 57650036 ref NC_002951.2 :1511760-1513152 | MVR | M36C05 | OK     | 2.70392 | 3.8841  | 0.522528  | -0.743992 | 0.45688 | 0.999883 |
| gene1446 | gene1446 | SACOL1476 | gi 57650036 ref NC_002951.2 :1513308-1514631 | MVR | M36C05 | OK     | 4.15082 | 9.81651 | 1.24182   | -1.80706  | 0.07075 | 0.522414 |
| gene1447 | gene1447 | ilvA1     | gi 57650036 ref NC_002951.2 :1514661-1515702 | MVR | M36C05 | OK     | 2.93468 | 6.81798 | 1.21614   | -1.71391  | 0.08655 | 0.589208 |
| gene1448 | gene1448 | ald1      | gi 57650036 ref NC_002951.2 :1515796-1516915 | MVR | M36C05 | OK     | 2.679   | 5.39893 | 1.01098   | -1.42058  | 0.15544 | 0.769852 |
| gene1449 | gene1449 | SACOL1479 | gi 57650036 ref NC_002951.2 :1517389-1518268 | MVR | M36C05 | OK     | 54.4567 | 48.2438 | -0.174768 | 0.2387    | 0.81134 | 0.999883 |
| gene145  | gene145  | cap5P     | gi 57650036 ref NC_002951.2 :168797-169973   | MVR | M36C05 | OK     | 8.60025 | 14.9111 | 0.793941  | -1.16177  | 0.24533 | 0.919205 |
| gene1450 | gene1450 | SACOL1480 | gi 57650036 ref NC_002951.2 :1518287-1521728 | MVR | M36C05 | OK     | 36.4016 | 43.0402 | 0.241681  | -0.284748 | 0.77584 | 0.999883 |
| gene1451 | gene1451 | SACOL1481 | gi 57650036 ref NC_002951.2 :1522031-1523372 | MVR | M36C05 | OK     | 2.46084 | 1.256   | -0.970314 | 1.28307   | 0.19947 | 0.867146 |
| gene1452 | gene1452 | SACOL1482 | gi 57650036 ref NC_002951.2 :1523577-1523910 | MVR | M36C05 | OK     | 17.6157 | 3.21226 | -2.4552   | 2.72312   | 0.00647 | 0.126644 |
| gene1453 | gene1453 | SACOL1483 | gi 57650036 ref NC_002951.2 :1523993-1525139 | MVR | M36C05 | OK     | 13.5737 | 8.15842 | -0.734454 | 1.07705   | 0.28146 | 0.965951 |
| gene1454 | gene1454 | SACOL1484 | gi 57650036 ref NC_002951.2 :1525789-1526134 | MVR | M36C05 | OK     | 124.51  | 140.497 | 0.174275  | -0.250985 | 0.80183 | 0.999883 |
| gene1455 | gene1455 | SACOL1485 | gi 57650036 ref NC_002951.2 :1526147-1527054 | MVR | M36C05 | OK     | 75.614  | 180.172 | 1.25265   | -1.33723  | 0.18115 | 0.828669 |
| gene1456 | gene1456 | SACOL1486 | gi 57650036 ref NC_002951.2 :1526147-1527054 | MVR | M36C05 | OK     | 106.716 | 149.013 | 0.481653  | -0.336844 | 0.73624 | 0.999883 |
| gene1457 | gene1457 | SACOL1488 | gi 57650036 ref NC_002951.2 :1527487-1530400 | MVR | M36C05 | NOTEST | 0       | 0       | 0         | 0         | 1       | 1        |
| gene1458 | gene1458 | recU      | gi 57650036 ref NC_002951.2 :1527487-1530400 | MVR | M36C05 | OK     | 72.3802 | 55.5762 | -0.381127 | 0.096427  | 0.92318 | 0.999883 |
| gene1459 | gene1459 | pbp2      | gi 57650036 ref NC_002951.2 :1527487-1530400 | MVR | M36C05 | OK     | 206.954 | 216.073 | 0.062206  | -0.062924 | 0.94983 | 0.999883 |
| gene146  | gene146  | SACOL0152 | gi 57650036 ref NC_002951.2 :170037-170364   | MVR | M36C05 | OK     | 27.0518 | 17.5589 | -0.62352  | 0.860385  | 0.38958 | 0.999883 |
| gene1460 | gene1460 | SACOL1491 | gi 57650036 ref NC_002951.2 :1530965-1531307 | MVR | M36C05 | OK     | 32.6749 | 33.3319 | 0.0287191 | -0.041389 | 0.96699 | 0.999883 |
| gene1461 | gene1461 | nth       | gi 57650036 ref NC_002951.2 :1531311-1532647 | MVR | M36C05 | OK     | 31.2417 | 37.9067 | 0.27898   | -0.257585 | 0.79673 | 0.999883 |
| gene1462 | gene1462 | SACOL1493 | gi 57650036 ref NC_002951.2 :1531311-1532647 | MVR | M36C05 | OK     | 28.9162 | 49.6234 | 0.779144  | -0.780632 | 0.43502 | 0.999883 |
| gene1463 | gene1463 | asnC      | gi 57650036 ref NC_002951.2 :1532974-1534267 | MVR | M36C05 | OK     | 89.0109 | 42.8662 | -1.05414  | 1.33679   | 0.18129 | 0.828813 |
| gene1464 | gene1464 | SACOL1495 | gi 57650036 ref NC_002951.2 :1534588-1537282 | MVR | M36C05 | OK     | 26.1438 | 14.4921 | -0.851202 | 1.12028   | 0.2626  | 0.944538 |
| gene1465 | gene1465 | birA      | gi 57650036 ref NC_002951.2 :1537305-1539466 | MVR | M36C05 | OK     | 30.6457 | 39.8543 | 0.379048  | -0.374013 | 0.7084  | 0.999883 |
| gene1466 | gene1466 | papS      | gi 57650036 ref NC_002951.2 :1537305-1539466 | MVR | M36C05 | OK     | 26.8815 | 13.4102 | -1.00328  | 0.827446  | 0.40799 | 0.999883 |
| gene1467 | gene1467 | SACOL1498 | gi 57650036 ref NC_002951.2 :1539470-1540625 | MVR | M36C05 | OK     | 26.8223 | 18.3565 | -0.547142 | 0.780619  | 0.43503 | 0.999883 |
| gene1468 | gene1468 | SACOL1499 | gi 57650036 ref NC_002951.2 :1540853-1541171 | MVR | M36C05 | OK     | 53.9512 | 35.6129 | -0.599258 | 0.868639  | 0.38504 | 0.999883 |
| gene1469 | gene1469 | SACOL1500 | gi 57650036 ref NC_002951.2 :1541507-1542215 | MVR | M36C05 | OK     | 1473.11 | 3002.25 | 1.02718   | -1.05599  | 0.29097 | 0.975616 |
| gene147  | gene147  | SACOL0153 | gi 57650036 ref NC_002951.2 :170370-170754   | MVR | M36C05 | OK     | 2.84558 | 4.16676 | 0.550202  | -0.573887 | 0.56604 | 0.999883 |

|          |          |           |                                              |     |        |        |         |         |             |             |         |          |
|----------|----------|-----------|----------------------------------------------|-----|--------|--------|---------|---------|-------------|-------------|---------|----------|
| gene1470 | gene1470 | SACOL1501 | gi 57650036 ref NC_002951.2 :1542259-1543412 | MVR | M36C05 | OK     | 16.3769 | 19.917  | 0.282333    | -0.285421   | 0.77532 | 0.999883 |
| gene1471 | gene1471 | SACOL1502 | gi 57650036 ref NC_002951.2 :1542259-1543412 | MVR | M36C05 | OK     | 20.5857 | 19.3792 | -0.0871357  | 0.091153    | 0.92737 | 0.999883 |
| gene1472 | gene1472 | SACOL1503 | gi 57650036 ref NC_002951.2 :1543425-1544670 | MVR | M36C05 | OK     | 28.64   | 23.6316 | -0.277312   | 0.388035    | 0.69799 | 0.999883 |
| gene1473 | gene1473 | aroA      | gi 57650036 ref NC_002951.2 :1544676-1545975 | MVR | M36C05 | OK     | 26.44   | 30.0932 | 0.186711    | -0.257887   | 0.79649 | 0.999883 |
| gene1474 | gene1474 | aroB      | gi 57650036 ref NC_002951.2 :1545984-1547049 | MVR | M36C05 | OK     | 18.0793 | 24.3474 | 0.429435    | -0.618981   | 0.53593 | 0.999883 |
| gene1475 | gene1475 | aroC      | gi 57650036 ref NC_002951.2 :1547074-1548241 | MVR | M36C05 | OK     | 16.1863 | 29.7581 | 0.878507    | -1.24838    | 0.21189 | 0.891421 |
| gene1476 | gene1476 | SACOL1507 | gi 57650036 ref NC_002951.2 :1548626-1548827 | MVR | M36C05 | NOTEST | 0       | 0       | 0           | 0           | 1       | 1        |
| gene1477 | gene1477 | SACOL1508 | gi 57650036 ref NC_002951.2 :1548855-1548981 | MVR | M36C05 | NOTEST | 0       | 0       | 0           | 0           | 1       | 1        |
| gene1478 | gene1478 | ndk       | gi 57650036 ref NC_002951.2 :1549035-1549485 | MVR | M36C05 | OK     | 187.225 | 50.753  | -1.88321    | 2.62596     | 0.00864 | 0.152769 |
| gene1479 | gene1479 | SACOL1510 | gi 57650036 ref NC_002951.2 :1549576-1550536 | MVR | M36C05 | OK     | 58.7151 | 36.2762 | -0.694707   | 0.947133    | 0.34357 | 0.999883 |
| gene148  | gene148  | aldA1     | gi 57650036 ref NC_002951.2 :171180-172668   | MVR | M36C05 | OK     | 1009.67 | 1700.41 | 0.752005    | -0.78156    | 0.43447 | 0.999883 |
| gene1480 | gene1480 | ubiE      | gi 57650036 ref NC_002951.2 :1550537-1551263 | MVR | M36C05 | OK     | 114.72  | 125.648 | 0.131268    | -0.168614   | 0.8661  | 0.999883 |
| gene1481 | gene1481 | SACOL1512 | gi 57650036 ref NC_002951.2 :1551265-1551838 | MVR | M36C05 | OK     | 72.6671 | 88.2049 | 0.279556    | -0.388319   | 0.69778 | 0.999883 |
| gene1482 | gene1482 | hup       | gi 57650036 ref NC_002951.2 :1552268-1552541 | MVR | M36C05 | OK     | 8177.93 | 10892   | 0.413459    | -0.423575   | 0.67188 | 0.999883 |
| gene1483 | gene1483 | gpsA      | gi 57650036 ref NC_002951.2 :1552711-1553710 | MVR | M36C05 | OK     | 89.1127 | 61.9686 | -0.524094   | 0.676562    | 0.49868 | 0.999883 |
| gene1484 | gene1484 | engA      | gi 57650036 ref NC_002951.2 :1553726-1555037 | MVR | M36C05 | OK     | 78.9289 | 62.8102 | -0.329555   | 0.412267    | 0.68014 | 0.999883 |
| gene1485 | gene1485 | rpsA      | gi 57650036 ref NC_002951.2 :1555258-1556434 | MVR | M36C05 | OK     | 343.518 | 559.846 | 0.704642    | -0.739941   | 0.45934 | 0.999883 |
| gene1486 | gene1486 | cmk       | gi 57650036 ref NC_002951.2 :1557145-1557805 | MVR | M36C05 | OK     | 57.5222 | 40.3058 | -0.513131   | 0.730944    | 0.46481 | 0.999883 |
| gene1487 | gene1487 | ansA      | gi 57650036 ref NC_002951.2 :1557881-1558850 | MVR | M36C05 | OK     | 14.2072 | 6.16641 | -1.20412    | 1.75461     | 0.07933 | 0.560274 |
| gene1488 | gene1488 | SACOL1520 | gi 57650036 ref NC_002951.2 :1558964-1559951 | MVR | M36C05 | OK     | 51.5031 | 33.3489 | -0.627022   | 0.861196    | 0.38913 | 0.999883 |
| gene1489 | gene1489 | SACOL1521 | gi 57650036 ref NC_002951.2 :1560111-1560228 | MVR | M36C05 | NOTEST | 0       | 0       | 0           | 0           | 1       | 1        |
| gene149  | gene149  | SACOL0155 | gi 57650036 ref NC_002951.2 :173313-174273   | MVR | M36C05 | OK     | 23.9945 | 60.9441 | 1.34478     | -1.85574    | 0.06349 | 0.504373 |
| gene1490 | gene1490 | SACOL1522 | gi 57650036 ref NC_002951.2 :1560352-1561813 | MVR | M36C05 | OK     | 233.186 | 926.161 | 1.98978     | -2.09394    | 0.03627 | 0.365532 |
| gene1491 | gene1491 | recQ2     | gi 57650036 ref NC_002951.2 :1561965-1564288 | MVR | M36C05 | OK     | 15.4812 | 36.3403 | 1.23105     | -1.17332    | 0.24067 | 0.911371 |
| gene1492 | gene1492 | SACOL1524 | gi 57650036 ref NC_002951.2 :1561965-1564288 | MVR | M36C05 | OK     | 23.711  | 44.9021 | 0.921224    | -0.817131   | 0.41385 | 0.999883 |
| gene1493 | gene1493 | fer       | gi 57650036 ref NC_002951.2 :1564395-1564644 | MVR | M36C05 | OK     | 240.67  | 134.052 | -0.84426    | 1.23705     | 0.21607 | 0.89416  |
| gene1494 | gene1494 | SACOL1526 | gi 57650036 ref NC_002951.2 :1564749-1565295 | MVR | M36C05 | OK     | 78.0052 | 36.6988 | -1.08784    | 1.56095     | 0.11854 | 0.683    |
| gene1495 | gene1495 | SACOL1528 | gi 57650036 ref NC_002951.2 :1565891-1566806 | MVR | M36C05 | OK     | 2.53873 | 1.85098 | -0.455815   | 0.582617    | 0.56015 | 0.999883 |
| gene1496 | gene1496 | SACOL1529 | gi 57650036 ref NC_002951.2 :1566820-1567898 | MVR | M36C05 | OK     | 0       | 3.09463 | 1.79769e+30 | 1.79769e+30 | 0.2187  | 0.89416  |
| gene1497 | gene1497 | SACOL1530 | gi 57650036 ref NC_002951.2 :1566820-1567898 | MVR | M36C05 | NOTEST | 0.62491 | 0.32487 | -0.943777   | 0.681384    | 0.49563 | 1        |
| gene1498 | gene1498 | SACOL1531 | gi 57650036 ref NC_002951.2 :1568015-1568933 | MVR | M36C05 | OK     | 1.26388 | 1.84324 | 0.544385    | -0.651326   | 0.51484 | 0.999883 |
| gene1499 | gene1499 | SACOL1532 | gi 57650036 ref NC_002951.2 :1569023-1572048 | MVR | M36C05 | OK     | 19.0946 | 18.8631 | -0.0175927  | 0.019854    | 0.98416 | 0.999883 |
| gene15   | gene15   | dnaB      | gi 57650036 ref NC_002951.2 :20786-22187     | MVR | M36C05 | OK     | 78.7583 | 32.2166 | -1.28963    | 1.65292     | 0.09835 | 0.633226 |

|          |          |           |                                              |     |        |        |         |         |            |           |          |          |
|----------|----------|-----------|----------------------------------------------|-----|--------|--------|---------|---------|------------|-----------|----------|----------|
| gene150  | gene150  | SACOL0156 | gi 57650036 ref NC_002951.2 :174334-174538   | MVR | M36C05 | OK     | 60.0788 | 830.669 | 3.78935    | -5.10114  | 3.38E-07 | 4.89E-05 |
| gene1500 | gene1500 | SACOL1533 | gi 57650036 ref NC_002951.2 :1569023-1572048 | MVR | M36C05 | OK     | 20.2757 | 19.59   | -0.0496365 | 0.03333   | 0.97341  | 0.999883 |
| gene1501 | gene1501 | srrB      | gi 57650036 ref NC_002951.2 :1572352-1574810 | MVR | M36C05 | OK     | 24.2297 | 11.7886 | -1.03939   | 0.736635  | 0.46134  | 0.999883 |
| gene1502 | gene1502 | srrA      | gi 57650036 ref NC_002951.2 :1572352-1574810 | MVR | M36C05 | OK     | 135.801 | 81.8076 | -0.731186  | 0.745481  | 0.45598  | 0.999883 |
| gene1503 | gene1503 | rluB      | gi 57650036 ref NC_002951.2 :1574942-1576939 | MVR | M36C05 | OK     | 44.7036 | 26.4549 | -0.756856  | 0.60556   | 0.54481  | 0.999883 |
| gene1504 | gene1504 | scpB      | gi 57650036 ref NC_002951.2 :1574942-1576939 | MVR | M36C05 | OK     | 40.8321 | 20.6025 | -0.986884  | 0.57353   | 0.56629  | 0.999883 |
| gene1505 | gene1505 | scpA      | gi 57650036 ref NC_002951.2 :1574942-1576939 | MVR | M36C05 | OK     | 41.5484 | 38.5752 | -0.107119  | 0.091319  | 0.92724  | 0.999883 |
| gene1506 | gene1506 | SACOL1539 | gi 57650036 ref NC_002951.2 :1577030-1577537 | MVR | M36C05 | OK     | 8.2479  | 39.5649 | 2.26212    | -3.18925  | 0.00143  | 0.044882 |
| gene1507 | gene1507 | xerD      | gi 57650036 ref NC_002951.2 :1577614-1578502 | MVR | M36C05 | OK     | 21.3114 | 18.4356 | -0.209136  | 0.305429  | 0.76004  | 0.999883 |
| gene1508 | gene1508 | SACOL1541 | gi 57650036 ref NC_002951.2 :1578550-1579000 | MVR | M36C05 | OK     | 120.616 | 227.285 | 0.91408    | -1.22841  | 0.21929  | 0.89416  |
| gene1509 | gene1509 | SACOL1542 | gi 57650036 ref NC_002951.2 :1579104-1579647 | MVR | M36C05 | OK     | 24.3528 | 24.1436 | -0.0124476 | 0.018297  | 0.9854   | 0.999883 |
| gene151  | gene151  | SACOL0157 | gi 57650036 ref NC_002951.2 :174716-175229   | MVR | M36C05 | OK     | 21.6096 | 17.9921 | -0.264304  | 0.385948  | 0.69954  | 0.999883 |
| gene1510 | gene1510 | SACOL1543 | gi 57650036 ref NC_002951.2 :1579728-1580637 | MVR | M36C05 | OK     | 74.8652 | 87.2665 | 0.221133   | -0.286832 | 0.77424  | 0.999883 |
| gene1511 | gene1511 | SACOL1544 | gi 57650036 ref NC_002951.2 :1580852-1581101 | MVR | M36C05 | OK     | 10.3737 | 18.2046 | 0.811375   | -0.912529 | 0.36149  | 0.999883 |
| gene1512 | gene1512 | SACOL1545 | gi 57650036 ref NC_002951.2 :1581116-1581872 | MVR | M36C05 | OK     | 9.01204 | 17.8585 | 0.986681   | -1.43882  | 0.1502   | 0.752771 |
| gene1513 | gene1513 | proC      | gi 57650036 ref NC_002951.2 :1582013-1582829 | MVR | M36C05 | OK     | 94.621  | 75.0316 | -0.334663  | 0.438691  | 0.66089  | 0.999883 |
| gene1514 | gene1514 | SACOL1548 | gi 57650036 ref NC_002951.2 :1582933-1583854 | MVR | M36C05 | OK     | 21.3096 | 14.2256 | -0.583015  | 0.852485  | 0.39395  | 0.999883 |
| gene1515 | gene1515 | zwf       | gi 57650036 ref NC_002951.2 :1584166-1585651 | MVR | M36C05 | OK     | 100.692 | 227.749 | 1.17749    | -1.32697  | 0.18452  | 0.834616 |
| gene1516 | gene1516 | SACOL1550 | gi 57650036 ref NC_002951.2 :1585853-1586747 | MVR | M36C05 | OK     | 41.3686 | 55.7815 | 0.431251   | -0.591316 | 0.55431  | 0.999883 |
| gene1517 | gene1517 | malA      | gi 57650036 ref NC_002951.2 :1586829-1588479 | MVR | M36C05 | OK     | 15.7497 | 15.6589 | -0.0083449 | 0.011862  | 0.99054  | 0.999883 |
| gene1518 | gene1518 | malR      | gi 57650036 ref NC_002951.2 :1588494-1589514 | MVR | M36C05 | OK     | 4.26099 | 4.97563 | 0.22369    | -0.318292 | 0.75026  | 0.999883 |
| gene1519 | gene1519 | SACOL1553 | gi 57650036 ref NC_002951.2 :1589707-1590079 | MVR | M36C05 | OK     | 560.973 | 903.08  | 0.686922   | -0.818266 | 0.41321  | 0.999883 |
| gene152  | gene152  | SACOL0158 | gi 57650036 ref NC_002951.2 :175570-178057   | MVR | M36C05 | OK     | 4.11941 | 4.03672 | -0.0292532 | 0.039272  | 0.96867  | 0.999883 |
| gene1520 | gene1520 | gnd       | gi 57650036 ref NC_002951.2 :1590297-1591704 | MVR | M36C05 | OK     | 244.816 | 338.555 | 0.46769    | -0.498293 | 0.61828  | 0.999883 |
| gene1521 | gene1521 | SACOL1555 | gi 57650036 ref NC_002951.2 :1591771-1592905 | MVR | M36C05 | OK     | 43.5072 | 132.449 | 1.60612    | -2.01723  | 0.04367  | 0.40838  |
| gene1522 | gene1522 | SACOL1556 | gi 57650036 ref NC_002951.2 :1593167-1593347 | MVR | M36C05 | NOTEST | 0       | 0       | 0          | 0         | 1        | 1        |
| gene1523 | gene1523 | SACOL1557 | gi 57650036 ref NC_002951.2 :1593473-1594454 | MVR | M36C05 | OK     | 60.0996 | 51.82   | -0.213845  | 0.285203  | 0.77549  | 0.999883 |
| gene1524 | gene1524 | SACOL1558 | gi 57650036 ref NC_002951.2 :1594467-1594905 | MVR | M36C05 | OK     | 52.3292 | 54.2114 | 0.0509805  | -0.074668 | 0.94048  | 0.999883 |
| gene1525 | gene1525 | SACOL1559 | gi 57650036 ref NC_002951.2 :1594977-1595076 | MVR | M36C05 | NOTEST | 0       | 0       | 0          | 0         | 1        | 1        |
| gene1526 | gene1526 | SACOL1560 | gi 57650036 ref NC_002951.2 :1595255-1596530 | MVR | M36C05 | OK     | 72.5059 | 28.9196 | -1.32605   | 1.73979   | 0.0819   | 0.569333 |
| gene1527 | gene1527 | SACOL1561 | gi 57650036 ref NC_002951.2 :1596542-1598518 | MVR | M36C05 | OK     | 58.0158 | 26.5844 | -1.12587   | 0.980161  | 0.32701  | 0.999883 |
| gene1528 | gene1528 | SACOL1562 | gi 57650036 ref NC_002951.2 :1596542-1598518 | MVR | M36C05 | OK     | 56.6526 | 34.4869 | -0.716095  | 0.662289  | 0.50779  | 0.999883 |
| gene1529 | gene1529 | lpdA      | gi 57650036 ref NC_002951.2 :1598533-1599955 | MVR | M36C05 | OK     | 47.745  | 32.1136 | -0.572165  | 0.755256  | 0.4501   | 0.999883 |

|          |          |           |                                              |     |        |    |         |         |             |           |         |          |
|----------|----------|-----------|----------------------------------------------|-----|--------|----|---------|---------|-------------|-----------|---------|----------|
| gene153  | gene153  | SACOL0159 | gi 57650036 ref NC_002951.2 :175570-178057   | MVR | M36C05 | OK | 3.04298 | 1.37414 | -1.14696    | 0.639068  | 0.52278 | 0.999883 |
| gene1530 | gene1530 | recN      | gi 57650036 ref NC_002951.2 :1600105-1601785 | MVR | M36C05 | OK | 65.919  | 70.0785 | 0.0882775   | -0.107115 | 0.9147  | 0.999883 |
| gene1531 | gene1531 | argR      | gi 57650036 ref NC_002951.2 :1601800-1602253 | MVR | M36C05 | OK | 87.0869 | 105.546 | 0.277344    | -0.393002 | 0.69432 | 0.999883 |
| gene1532 | gene1532 | ispA      | gi 57650036 ref NC_002951.2 :1602684-1605104 | MVR | M36C05 | OK | 69.1381 | 57.8963 | -0.256011   | 0.198348  | 0.84277 | 0.999883 |
| gene1533 | gene1533 | xseB      | gi 57650036 ref NC_002951.2 :1602684-1605104 | MVR | M36C05 | OK | 69.6277 | 47.9601 | -0.537827   | 0.107114  | 0.9147  | 0.999883 |
| gene1534 | gene1534 | xseA      | gi 57650036 ref NC_002951.2 :1602684-1605104 | MVR | M36C05 | OK | 52.7617 | 50.0819 | -0.0752023  | 0.068078  | 0.94572 | 0.999883 |
| gene1535 | gene1535 | nusB      | gi 57650036 ref NC_002951.2 :1605120-1605510 | MVR | M36C05 | OK | 56.0861 | 79.081  | 0.495687    | -0.724817 | 0.46857 | 0.999883 |
| gene1536 | gene1536 | SACOL1570 | gi 57650036 ref NC_002951.2 :1605569-1605932 | MVR | M36C05 | OK | 66.7788 | 120.145 | 0.847317    | -1.23047  | 0.21852 | 0.89416  |
| gene1537 | gene1537 | accC      | gi 57650036 ref NC_002951.2 :1605946-1607766 | MVR | M36C05 | OK | 51.148  | 36.8092 | -0.474609   | 0.553098  | 0.5802  | 0.999883 |
| gene1538 | gene1538 | accB      | gi 57650036 ref NC_002951.2 :1605946-1607766 | MVR | M36C05 | OK | 54.1053 | 33.7382 | -0.681389   | 0.37082   | 0.71077 | 0.999883 |
| gene1539 | gene1539 | SACOL1573 | gi 57650036 ref NC_002951.2 :1608120-1609141 | MVR | M36C05 | OK | 48.2795 | 34.5183 | -0.484051   | 0.66322   | 0.50719 | 0.999883 |
| gene154  | gene154  | SACOL0160 | gi 57650036 ref NC_002951.2 :178069-179101   | MVR | M36C05 | OK | 2.75023 | 3.4459  | 0.325328    | -0.446131 | 0.6555  | 0.999883 |
| gene1540 | gene1540 | SACOL1574 | gi 57650036 ref NC_002951.2 :1609249-1609591 | MVR | M36C05 | OK | 0       | 8.33297 | 1.79769e+30 | 1.79769e+ | 0.00606 | 0.121216 |
| gene1541 | gene1541 | SACOL1575 | gi 57650036 ref NC_002951.2 :1609646-1610237 | MVR | M36C05 | OK | 1.91099 | 3.95278 | 1.04855     | -1.23275  | 0.21767 | 0.89416  |
| gene1542 | gene1542 | SACOL1576 | gi 57650036 ref NC_002951.2 :1610243-1613127 | MVR | M36C05 | OK | 2.77118 | 11.5865 | 2.06387     | -1.73757  | 0.08229 | 0.571339 |
| gene1543 | gene1543 | SACOL1577 | gi 57650036 ref NC_002951.2 :1610243-1613127 | MVR | M36C05 | OK | 3.60152 | 8.09206 | 1.1679      | -1.34583  | 0.17836 | 0.821737 |
| gene1544 | gene1544 | SACOL1578 | gi 57650036 ref NC_002951.2 :1613131-1614490 | MVR | M36C05 | OK | 1.49432 | 0.85602 | -0.803762   | 0.994314  | 0.32007 | 0.999883 |
| gene1545 | gene1545 | SACOL1579 | gi 57650036 ref NC_002951.2 :1614543-1617039 | MVR | M36C05 | OK | 3.19232 | 2.68771 | -0.248224   | 0.363703  | 0.71608 | 0.999883 |
| gene1546 | gene1546 | SACOL1580 | gi 57650036 ref NC_002951.2 :1617073-1617457 | MVR | M36C05 | OK | 1.77849 | 1.78576 | 0.00588165  | -0.005064 | 0.99596 | 0.999883 |
| gene1547 | gene1547 | SACOL1581 | gi 57650036 ref NC_002951.2 :1617468-1617729 | MVR | M36C05 | OK | 20.8076 | 10.1443 | -1.03644    | 1.22179   | 0.22179 | 0.89416  |
| gene1548 | gene1548 | SACOL1582 | gi 57650036 ref NC_002951.2 :1617733-1618789 | MVR | M36C05 | OK | 2.8115  | 1.6746  | -0.747528   | 0.980303  | 0.32694 | 0.999883 |
| gene1549 | gene1549 | SACOL1583 | gi 57650036 ref NC_002951.2 :1618849-1619941 | MVR | M36C05 | OK | 5.18775 | 4.20278 | -0.303763   | 0.4353    | 0.66335 | 0.999883 |
| gene155  | gene155  | SACOL0161 | gi 57650036 ref NC_002951.2 :179317-179677   | MVR | M36C05 | OK | 449.545 | 265.538 | -0.759547   | 0.991345  | 0.32152 | 0.999883 |
| gene1550 | gene1550 | SACOL1584 | gi 57650036 ref NC_002951.2 :1620115-1620418 | MVR | M36C05 | OK | 3.67309 | 1.99077 | -0.883668   | 0.707612  | 0.47919 | 0.999883 |
| gene1551 | gene1551 | SACOL1585 | gi 57650036 ref NC_002951.2 :1620431-1620752 | MVR | M36C05 | OK | 10.6605 | 5.22968 | -1.02748    | 1.17276   | 0.24089 | 0.911371 |
| gene1552 | gene1552 | SACOL1586 | gi 57650036 ref NC_002951.2 :1620902-1621187 | MVR | M36C05 | OK | 0.71369 | 1.15323 | 0.692314    | -0.296183 | 0.76709 | 0.999883 |
| gene1553 | gene1553 | efp       | gi 57650036 ref NC_002951.2 :1621581-1622139 | MVR | M36C05 | OK | 294.046 | 297.924 | 0.0189039   | -0.022868 | 0.98176 | 0.999883 |
| gene1554 | gene1554 | SACOL1588 | gi 57650036 ref NC_002951.2 :1622164-1623226 | MVR | M36C05 | OK | 56.4556 | 77.646  | 0.459794    | -0.595953 | 0.55121 | 0.999883 |
| gene1555 | gene1555 | SACOL1589 | gi 57650036 ref NC_002951.2 :1623330-1623912 | MVR | M36C05 | OK | 24.3229 | 30.9235 | 0.34639     | -0.508545 | 0.61107 | 0.999883 |
| gene1556 | gene1556 | SACOL1590 | gi 57650036 ref NC_002951.2 :1623925-1624144 | MVR | M36C05 | OK | 93.1691 | 57.5312 | -0.695507   | 0.969384  | 0.33235 | 0.999883 |
| gene1557 | gene1557 | SACOL1591 | gi 57650036 ref NC_002951.2 :1624207-1625038 | MVR | M36C05 | OK | 53.0776 | 47.5484 | -0.158708   | 0.218925  | 0.82671 | 0.999883 |
| gene1558 | gene1558 | SACOL1592 | gi 57650036 ref NC_002951.2 :1625195-1625582 | MVR | M36C05 | OK | 92.6991 | 64.4724 | -0.523872   | 0.764182  | 0.44476 | 0.999883 |
| gene1559 | gene1559 | SACOL1593 | gi 57650036 ref NC_002951.2 :1625946-1628758 | MVR | M36C05 | OK | 32.4036 | 22.0805 | -0.553379   | 0.510658  | 0.60959 | 0.999883 |



|          |          |           |                                              |     |        |        |         |         |                               |           |         |           |
|----------|----------|-----------|----------------------------------------------|-----|--------|--------|---------|---------|-------------------------------|-----------|---------|-----------|
| gene156  | gene156  | SACOL0162 | gi 57650036 ref NC_002951.2 :179849-180875   | MVR | M36C05 | OK     | 4.44787 | 7.20892 | 0.696669                      | -1.00275  | 0.31598 | 0.999465  |
| gene1560 | gene1560 | SACOL1594 | gi 57650036 ref NC_002951.2 :1625946-1628758 | MVR | M36C05 | OK     | 32.1846 | 22.9702 | -0.486607                     | 0.429301  | 0.6677  | 0.999883  |
| gene1561 | gene1561 | gcvT      | gi 57650036 ref NC_002951.2 :1628777-1629869 | MVR | M36C05 | OK     | 20.3467 | 18.1709 | -0.163171                     | 0.236138  | 0.81333 | 0.999883  |
| gene1562 | gene1562 | aroK      | gi 57650036 ref NC_002951.2 :1630027-1630552 | MVR | M36C05 | OK     | 27.7385 | 28.1999 | 0.0238003                     | -0.034998 | 0.97208 | 0.999883  |
| gene1563 | gene1563 | SACOL1597 | gi 57650036 ref NC_002951.2 :1630784-1631282 | MVR | M36C05 | NOTEST | 0.42579 | 0.74108 | 0.79948                       | -0.483704 | 0.6286  | 1         |
| gene1564 | gene1564 | SACOL1598 | gi 57650036 ref NC_002951.2 :1631485-1632221 | MVR | M36C05 | NOTEST | 0.26054 | 0       | -1.79769e+3(-1.79769e+0.27986 |           |         | 1         |
| gene1565 | gene1565 | comGC     | gi 57650036 ref NC_002951.2 :1631485-1632221 | MVR | M36C05 | OK     | 0.57026 | 1.85983 | 1.70548                       | -0.626414 | 0.53104 | 0.999883  |
| gene1566 | gene1566 | SACOL1600 | gi 57650036 ref NC_002951.2 :1632234-1634251 | MVR | M36C05 | OK     | 1.86417 | 1.26595 | -0.558316                     | 0.528305  | 0.59729 | 0.999883  |
| gene1567 | gene1567 | SACOL1601 | gi 57650036 ref NC_002951.2 :1632234-1634251 | MVR | M36C05 | OK     | 1.79091 | 1.99211 | 0.1536                        | -0.151751 | 0.87938 | 0.999883  |
| gene1568 | gene1568 | SACOL1602 | gi 57650036 ref NC_002951.2 :1634302-1637882 | MVR | M36C05 | OK     | 68.2459 | 34.6234 | -0.978992                     | 0.528887  | 0.59688 | 0.999883  |
| gene1569 | gene1569 | SACOL1603 | gi 57650036 ref NC_002951.2 :1634302-1637882 | MVR | M36C05 | OK     | 57.964  | 43.4238 | -0.416672                     | 0.125911  | 0.8998  | 0.999883  |
| gene157  | gene157  | SACOL0163 | gi 57650036 ref NC_002951.2 :181260-182511   | MVR | M36C05 | OK     | 24.6004 | 21.7134 | -0.180098                     | 0.254661  | 0.79899 | 0.999883  |
| gene1570 | gene1570 | glk       | gi 57650036 ref NC_002951.2 :1634302-1637882 | MVR | M36C05 | OK     | 50.1236 | 37.6926 | -0.411207                     | 0.288267  | 0.77314 | 0.999883  |
| gene1571 | gene1571 | SACOL1605 | gi 57650036 ref NC_002951.2 :1634302-1637882 | MVR | M36C05 | OK     | 10.3584 | 13.1331 | 0.342406                      | -0.023766 | 0.98104 | 0.999883  |
| gene1572 | gene1572 | SACOL1606 | gi 57650036 ref NC_002951.2 :1634302-1637882 | MVR | M36C05 | OK     | 37.7798 | 26.6854 | -0.501563                     | 0.382501  | 0.70209 | 0.999883  |
| gene1573 | gene1573 | SACOL1607 | gi 57650036 ref NC_002951.2 :1637893-1638433 | MVR | M36C05 | OK     | 41.2173 | 36.6976 | -0.167567                     | 0.245105  | 0.80638 | 0.999883  |
| gene1574 | gene1574 | rpmG      | gi 57650036 ref NC_002951.2 :1638641-1638791 | MVR | M36C05 | OK     | 2264.82 | 474.778 | -2.25407                      | 3.21493   | 0.0013  | 0.0416986 |
| gene1575 | gene1575 | pbp3      | gi 57650036 ref NC_002951.2 :1638903-1640979 | MVR | M36C05 | OK     | 87.0716 | 86.5313 | -0.0089797                    | 0.010306  | 0.99178 | 0.999883  |
| gene1576 | gene1576 | sodA2     | gi 57650036 ref NC_002951.2 :1641099-1641699 | MVR | M36C05 | OK     | 128.244 | 307.438 | 1.26141                       | -1.57112  | 0.11616 | 0.673572  |
| gene1577 | gene1577 | SACOL1611 | gi 57650036 ref NC_002951.2 :1641974-1643235 | MVR | M36C05 | OK     | 26.2032 | 11.9947 | -1.12734                      | 0.953719  | 0.34023 | 0.999883  |
| gene1578 | gene1578 | SACOL1612 | gi 57650036 ref NC_002951.2 :1641974-1643235 | MVR | M36C05 | OK     | 14.3443 | 8.13945 | -0.817472                     | 0.97477   | 0.32967 | 0.999883  |
| gene1579 | gene1579 | SACOL1613 | gi 57650036 ref NC_002951.2 :1643276-1644062 | MVR | M36C05 | OK     | 21.0159 | 13.1778 | -0.673374                     | 0.988187  | 0.32306 | 0.999883  |
| gene158  | gene158  | SACOL0164 | gi 57650036 ref NC_002951.2 :182957-190133   | MVR | M36C05 | OK     | 20.8002 | 16.0294 | -0.375873                     | 0.443125  | 0.65768 | 0.999883  |
| gene1580 | gene1580 | nfo       | gi 57650036 ref NC_002951.2 :1644187-1645078 | MVR | M36C05 | OK     | 73.7287 | 32.4013 | -1.18617                      | 1.6203    | 0.10517 | 0.651623  |
| gene1581 | gene1581 | SACOL1615 | gi 57650036 ref NC_002951.2 :1645087-1646434 | MVR | M36C05 | OK     | 52.5473 | 29.5056 | -0.832626                     | 1.10531   | 0.26903 | 0.952424  |
| gene1582 | gene1582 | SACOL1616 | gi 57650036 ref NC_002951.2 :1646547-1647648 | MVR | M36C05 | OK     | 43.1433 | 50.9082 | 0.238759                      | -0.319406 | 0.74942 | 0.999883  |
| gene1583 | gene1583 | SACOL1617 | gi 57650036 ref NC_002951.2 :1647650-1648328 | MVR | M36C05 | OK     | 22.0202 | 46.8656 | 1.0897                        | -1.57522  | 0.11521 | 0.671711  |
| gene1584 | gene1584 | rpoD      | gi 57650036 ref NC_002951.2 :1648458-1649565 | MVR | M36C05 | OK     | 101.728 | 173.473 | 0.769997                      | -0.914872 | 0.36026 | 0.999883  |
| gene1585 | gene1585 | dnaG      | gi 57650036 ref NC_002951.2 :1649788-1651588 | MVR | M36C05 | OK     | 74.1867 | 57.9314 | -0.356816                     | 0.430694  | 0.66669 | 0.999883  |
| gene1586 | gene1586 | SACOL1620 | gi 57650036 ref NC_002951.2 :1651648-1652467 | MVR | M36C05 | OK     | 48.9392 | 54.3522 | 0.151347                      | -0.208606 | 0.83476 | 0.999883  |
| gene1587 | gene1587 | SACOL1621 | gi 57650036 ref NC_002951.2 :1652477-1653017 | MVR | M36C05 | OK     | 16.6348 | 15.2636 | -0.12411                      | 0.180332  | 0.85689 | 0.999883  |
| gene1588 | gene1588 | glyS      | gi 57650036 ref NC_002951.2 :1653435-1654827 | MVR | M36C05 | OK     | 394.572 | 446.672 | 0.178926                      | -0.185504 | 0.85283 | 0.999883  |
| gene1589 | gene1589 | SACOL1623 | gi 57650036 ref NC_002951.2 :1654976-1655729 | MVR | M36C05 | OK     | 79.9102 | 50.4749 | -0.662815                     | 0.904209  | 0.36589 | 0.999883  |

|          |          |           |                                              |     |        |        |         |         |            |           |         |          |
|----------|----------|-----------|----------------------------------------------|-----|--------|--------|---------|---------|------------|-----------|---------|----------|
| gene159  | gene159  | SACOL0165 | gi 57650036 ref NC_002951.2 :190145-190790   | MVR | M36C05 | OK     | 36.6582 | 32.4904 | -0.174121  | 0.253336  | 0.80001 | 0.999883 |
| gene1590 | gene1590 | era       | gi 57650036 ref NC_002951.2 :1655750-1656650 | MVR | M36C05 | OK     | 62.6269 | 56.2481 | -0.154976  | 0.207749  | 0.83543 | 0.999883 |
| gene1591 | gene1591 | cdd       | gi 57650036 ref NC_002951.2 :1656650-1657055 | MVR | M36C05 | OK     | 38.1365 | 44.5186 | 0.223237   | -0.327908 | 0.74298 | 0.999883 |
| gene1592 | gene1592 | dgkA      | gi 57650036 ref NC_002951.2 :1657065-1657410 | MVR | M36C05 | OK     | 53.2327 | 66.16   | 0.313647   | -0.460528 | 0.64514 | 0.999883 |
| gene1593 | gene1593 | SACOL1627 | gi 57650036 ref NC_002951.2 :1657412-1657880 | MVR | M36C05 | OK     | 86.862  | 124.8   | 0.522825   | -0.730728 | 0.46495 | 0.999883 |
| gene1594 | gene1594 | SACOL1628 | gi 57650036 ref NC_002951.2 :1657880-1658801 | MVR | M36C05 | OK     | 56.7137 | 130.937 | 1.2071     | -1.54375  | 0.12265 | 0.695963 |
| gene1595 | gene1595 | SACOL1629 | gi 57650036 ref NC_002951.2 :1659131-1659830 | MVR | M36C05 | OK     | 365.435 | 459.513 | 0.330491   | -0.371091 | 0.71057 | 0.999883 |
| gene1596 | gene1596 | SACOL1630 | gi 57650036 ref NC_002951.2 :1659846-1660836 | MVR | M36C05 | OK     | 277.043 | 409.832 | 0.564922   | -0.617235 | 0.53708 | 0.999883 |
| gene1597 | gene1597 | SACOL1631 | gi 57650036 ref NC_002951.2 :1660853-1661561 | MVR | M36C05 | OK     | 270.946 | 338.627 | 0.321694   | -0.372228 | 0.70972 | 0.999883 |
| gene1598 | gene1598 | rpsU      | gi 57650036 ref NC_002951.2 :1661780-1661957 | MVR | M36C05 | OK     | 11432.7 | 8648.61 | -0.402627  | 0.462699  | 0.64358 | 0.999883 |
| gene1599 | gene1599 | SACOL1633 | gi 57650036 ref NC_002951.2 :1662249-1663596 | MVR | M36C05 | OK     | 50.6204 | 36.3294 | -0.478581  | 0.630037  | 0.52867 | 0.999883 |
| gene16   | gene16   | SACOL0017 | gi 57650036 ref NC_002951.2 :22262-22355     | MVR | M36C05 | NOTEST | 0       | 0       | 0          | 0         | 1       | 1        |
| gene160  | gene160  | SACOL0166 | gi 57650036 ref NC_002951.2 :191117-191612   | MVR | M36C05 | OK     | 49.7165 | 121.648 | 1.29092    | -1.81624  | 0.06933 | 0.522414 |
| gene1600 | gene1600 | SACOL1634 | gi 57650036 ref NC_002951.2 :1663602-1664355 | MVR | M36C05 | OK     | 34.042  | 25.7362 | -0.403516  | 0.585182  | 0.55843 | 0.999883 |
| gene1601 | gene1601 | prmA      | gi 57650036 ref NC_002951.2 :1664356-1665295 | MVR | M36C05 | OK     | 80.2308 | 49.2469 | -0.704123  | 0.932847  | 0.3509  | 0.999883 |
| gene1602 | gene1602 | dnaJ      | gi 57650036 ref NC_002951.2 :1665298-1666438 | MVR | M36C05 | OK     | 54.7142 | 45.5099 | -0.265737  | 0.351716  | 0.72505 | 0.999883 |
| gene1603 | gene1603 | dnaK      | gi 57650036 ref NC_002951.2 :1666573-1668406 | MVR | M36C05 | OK     | 449.442 | 285.825 | -0.653004  | 0.673449  | 0.50066 | 0.999883 |
| gene1604 | gene1604 | grpE      | gi 57650036 ref NC_002951.2 :1668474-1669101 | MVR | M36C05 | OK     | 195.383 | 112.186 | -0.800407  | 1.02651   | 0.30465 | 0.990021 |
| gene1605 | gene1605 | hrcA      | gi 57650036 ref NC_002951.2 :1669132-1670110 | MVR | M36C05 | OK     | 166.745 | 89.8657 | -0.891805  | 1.08904   | 0.27613 | 0.961224 |
| gene1606 | gene1606 | SACOL1640 | gi 57650036 ref NC_002951.2 :1670209-1671367 | MVR | M36C05 | OK     | 6.63707 | 3.33754 | -0.991761  | 1.42152   | 0.15517 | 0.769852 |
| gene1607 | gene1607 | lepA      | gi 57650036 ref NC_002951.2 :1671896-1673720 | MVR | M36C05 | OK     | 28.0014 | 17.1021 | -0.711326  | 0.96759   | 0.33325 | 0.999883 |
| gene1608 | gene1608 | rpsT      | gi 57650036 ref NC_002951.2 :1674065-1674317 | MVR | M36C05 | OK     | 900.018 | 311.748 | -1.52958   | 2.08479   | 0.03709 | 0.369812 |
| gene1609 | gene1609 | holA      | gi 57650036 ref NC_002951.2 :1674361-1675336 | MVR | M36C05 | OK     | 17.2862 | 6.11861 | -1.49834   | 2.17847   | 0.02937 | 0.325512 |
| gene161  | gene161  | argB      | gi 57650036 ref NC_002951.2 :191866-192631   | MVR | M36C05 | OK     | 1.51306 | 1.36683 | -0.146631  | 0.164784  | 0.86911 | 0.999883 |
| gene1610 | gene1610 | SACOL1644 | gi 57650036 ref NC_002951.2 :1675392-1677540 | MVR | M36C05 | OK     | 2.97923 | 6.16643 | 1.0495     | -1.53417  | 0.12499 | 0.700644 |
| gene1611 | gene1611 | SACOL1645 | gi 57650036 ref NC_002951.2 :1677598-1678030 | MVR | M36C05 | OK     | 30.0952 | 52.2686 | 0.796412   | -1.16599  | 0.24362 | 0.916835 |
| gene1612 | gene1612 | comEA     | gi 57650036 ref NC_002951.2 :1678151-1678838 | MVR | M36C05 | OK     | 5.93476 | 5.89137 | -0.0105881 | 0.0147    | 0.98827 | 0.999883 |
| gene1613 | gene1613 | SACOL1647 | gi 57650036 ref NC_002951.2 :1678877-1679594 | MVR | M36C05 | OK     | 91.1975 | 51.4344 | -0.826261  | 1.12599   | 0.26017 | 0.939875 |
| gene1614 | gene1614 | SACOL1648 | gi 57650036 ref NC_002951.2 :1679596-1679950 | MVR | M36C05 | OK     | 98.3024 | 109.758 | 0.159025   | -0.231084 | 0.81725 | 0.999883 |
| gene1615 | gene1615 | SACOL1649 | gi 57650036 ref NC_002951.2 :1679950-1681094 | MVR | M36C05 | OK     | 47.1095 | 53.3353 | 0.179072   | -0.18343  | 0.85446 | 0.999883 |
| gene1616 | gene1616 | nadD      | gi 57650036 ref NC_002951.2 :1679950-1681094 | MVR | M36C05 | OK     | 59.7842 | 19.3956 | -1.62404   | 1.33049   | 0.18336 | 0.832468 |
| gene1617 | gene1617 | SACOL1651 | gi 57650036 ref NC_002951.2 :1681096-1681387 | MVR | M36C05 | OK     | 11.5057 | 5.47979 | -1.07015   | 1.17292   | 0.24083 | 0.911371 |
| gene1618 | gene1618 | aroE      | gi 57650036 ref NC_002951.2 :1681390-1682197 | MVR | M36C05 | OK     | 37.5097 | 11.4491 | -1.71203   | 2.47471   | 0.01333 | 0.198974 |

|          |          |           |                                              |     |        |    |         |         |            |           |          |           |
|----------|----------|-----------|----------------------------------------------|-----|--------|----|---------|---------|------------|-----------|----------|-----------|
| gene1619 | gene1619 | SACOL1653 | gi 57650036 ref NC_002951.2 :1682210-1683311 | MVR | M36C05 | OK | 29.6736 | 8.68865 | -1.77197   | 2.54396   | 0.01096  | 0.176265  |
| gene162  | gene162  | argJ      | gi 57650036 ref NC_002951.2 :192646-193888   | MVR | M36C05 | OK | 2.18305 | 1.69284 | -0.366903  | 0.48818   | 0.62542  | 0.999883  |
| gene1620 | gene1620 | SACOL1654 | gi 57650036 ref NC_002951.2 :1683311-1683839 | MVR | M36C05 | OK | 39.5676 | 14.1392 | -1.48462   | 2.15924   | 0.03083  | 0.336036  |
| gene1621 | gene1621 | mtn       | gi 57650036 ref NC_002951.2 :1683858-1684545 | MVR | M36C05 | OK | 19.3195 | 11.103  | -0.799117  | 1.16894   | 0.24243  | 0.913772  |
| gene1622 | gene1622 | SACOL1656 | gi 57650036 ref NC_002951.2 :1684858-1685128 | MVR | M36C05 | OK | 15.6452 | 9.26358 | -0.756077  | 0.8769    | 0.38054  | 0.999883  |
| gene1623 | gene1623 | SACOL1657 | gi 57650036 ref NC_002951.2 :1685329-1686034 | MVR | M36C05 | OK | 4.61887 | 3.71451 | -0.314367  | 0.420179  | 0.67436  | 0.999883  |
| gene1624 | gene1624 | SACOL1658 | gi 57650036 ref NC_002951.2 :1686495-1687716 | MVR | M36C05 | OK | 9.56132 | 16.413  | 0.779557   | -1.13734  | 0.2554   | 0.93309   |
| gene1625 | gene1625 | SACOL1659 | gi 57650036 ref NC_002951.2 :1688004-1689234 | MVR | M36C05 | OK | 37.8451 | 22.2635 | -0.765427  | 1.05914   | 0.28954  | 0.975616  |
| gene1626 | gene1626 | SACOL1660 | gi 57650036 ref NC_002951.2 :1689246-1691360 | MVR | M36C05 | OK | 33.3788 | 20.1501 | -0.72815   | 0.518405  | 0.60418  | 0.999883  |
| gene1627 | gene1627 | SACOL1661 | gi 57650036 ref NC_002951.2 :1689246-1691360 | MVR | M36C05 | OK | 35.2551 | 24.8554 | -0.504273  | 0.558917  | 0.57622  | 0.999883  |
| gene1628 | gene1628 | SACOL1662 | gi 57650036 ref NC_002951.2 :1691373-1691823 | MVR | M36C05 | OK | 19.5455 | 17.6532 | -0.146904  | 0.211605  | 0.83242  | 0.999883  |
| gene1629 | gene1629 | SACOL1663 | gi 57650036 ref NC_002951.2 :1691824-1693559 | MVR | M36C05 | OK | 24.595  | 24.2027 | -0.0231966 | 0.027704  | 0.9779   | 0.999883  |
| gene163  | gene163  | argC      | gi 57650036 ref NC_002951.2 :193899-194931   | MVR | M36C05 | OK | 1.95411 | 1.98802 | 0.0248189  | -0.032077 | 0.97441  | 0.999883  |
| gene1630 | gene1630 | SACOL1664 | gi 57650036 ref NC_002951.2 :1691824-1693559 | MVR | M36C05 | OK | 15.7896 | 12.1675 | -0.37594   | 0.27341   | 0.78454  | 0.999883  |
| gene1631 | gene1631 | greA      | gi 57650036 ref NC_002951.2 :1693884-1694361 | MVR | M36C05 | OK | 211.183 | 243.519 | 0.20554    | -0.264693 | 0.79125  | 0.999883  |
| gene1632 | gene1632 | udk       | gi 57650036 ref NC_002951.2 :1694388-1696280 | MVR | M36C05 | OK | 52.9015 | 57.2719 | 0.114518   | -0.094694 | 0.92456  | 0.999883  |
| gene1633 | gene1633 | SACOL1667 | gi 57650036 ref NC_002951.2 :1694388-1696280 | MVR | M36C05 | OK | 43.4846 | 17.1192 | -1.34489   | 1.27968   | 0.20066  | 0.869538  |
| gene1634 | gene1634 | SACOL1668 | gi 57650036 ref NC_002951.2 :1696291-1697215 | MVR | M36C05 | OK | 32.4957 | 13.8619 | -1.22912   | 1.77545   | 0.07582  | 0.545462  |
| gene1635 | gene1635 | SACOL1669 | gi 57650036 ref NC_002951.2 :1697217-1697856 | MVR | M36C05 | OK | 11.9733 | 5.0283  | -1.25167   | 1.74924   | 0.08025  | 0.563304  |
| gene1636 | gene1636 | SACOL1670 | gi 57650036 ref NC_002951.2 :1698140-1698449 | MVR | M36C05 | OK | 1320.87 | 2377.21 | 0.847777   | -0.956302 | 0.33892  | 0.999883  |
| gene1637 | gene1637 | SACOL1671 | gi 57650036 ref NC_002951.2 :1698463-1698892 | MVR | M36C05 | OK | 256.854 | 671.415 | 1.38626    | -1.69504  | 0.09007  | 0.602417  |
| gene1638 | gene1638 | SACOL1672 | gi 57650036 ref NC_002951.2 :1698895-1699156 | MVR | M36C05 | OK | 330.208 | 833.282 | 1.33543    | -1.80054  | 0.07177  | 0.526806  |
| gene1639 | gene1639 | alaS      | gi 57650036 ref NC_002951.2 :1699218-1701849 | MVR | M36C05 | OK | 68.2365 | 48.8643 | -0.481762  | 0.561954  | 0.57415  | 0.999883  |
| gene164  | gene164  | rocD1     | gi 57650036 ref NC_002951.2 :194969-196154   | MVR | M36C05 | OK | 3.10361 | 1.56702 | -0.985923  | 1.31744   | 0.18769  | 0.844299  |
| gene1640 | gene1640 | SACOL1674 | gi 57650036 ref NC_002951.2 :1702191-1704669 | MVR | M36C05 | OK | 23.6924 | 17.6566 | -0.424216  | 0.561361  | 0.57455  | 0.999883  |
| gene1641 | gene1641 | SACOL1675 | gi 57650036 ref NC_002951.2 :1704670-1705339 | MVR | M36C05 | OK | 25.3554 | 14.5888 | -0.79743   | 1.16958   | 0.24217  | 0.913772  |
| gene1642 | gene1642 | mnmA      | gi 57650036 ref NC_002951.2 :1705800-1706919 | MVR | M36C05 | OK | 55.9323 | 62.0277 | 0.149231   | -0.194686 | 0.84564  | 0.999883  |
| gene1643 | gene1643 | SACOL1677 | gi 57650036 ref NC_002951.2 :1706919-1708062 | MVR | M36C05 | OK | 37.9904 | 51.3279 | 0.434106   | -0.581581 | 0.56085  | 0.999883  |
| gene1644 | gene1644 | SACOL1678 | gi 57650036 ref NC_002951.2 :1708373-1709387 | MVR | M36C05 | OK | 73.875  | 219.866 | 1.57346    | -1.89828  | 0.05766  | 0.48127   |
| gene1645 | gene1645 | SACOL1679 | gi 57650036 ref NC_002951.2 :1709623-1709770 | MVR | M36C05 | OK | 149.794 | 2298.48 | 3.93963    | -4.87708  | 1.08E-06 | 0.0001217 |
| gene1646 | gene1646 | SACOL1680 | gi 57650036 ref NC_002951.2 :1709809-1709992 | MVR | M36C05 | OK | 23.4188 | 348.89  | 3.89703    | -4.38249  | 1.17E-05 | 0.000913  |
| gene1647 | gene1647 | SACOL1681 | gi 57650036 ref NC_002951.2 :1710091-1710514 | MVR | M36C05 | OK | 143.02  | 206.01  | 0.526497   | -0.714032 | 0.47521  | 0.999883  |
| gene1648 | gene1648 | SACOL1682 | gi 57650036 ref NC_002951.2 :1710598-1711873 | MVR | M36C05 | OK | 79.3503 | 97.1166 | 0.291482   | -0.356512 | 0.72146  | 0.999883  |

|          |          |           |                                              |     |        |    |         |         |           |           |         |          |
|----------|----------|-----------|----------------------------------------------|-----|--------|----|---------|---------|-----------|-----------|---------|----------|
| gene1649 | gene1649 | SACOL1683 | gi 57650036 ref NC_002951.2 :1712033-1712807 | MVR | M36C05 | OK | 26.0454 | 13.0693 | -0.99485  | 1.45549   | 0.14553 | 0.743774 |
| gene165  | gene165  | brnQ1     | gi 57650036 ref NC_002951.2 :196406-197762   | MVR | M36C05 | OK | 24.179  | 11.634  | -1.05541  | 1.50685   | 0.13185 | 0.719601 |
| gene1650 | gene1650 | aspS      | gi 57650036 ref NC_002951.2 :1713267-1715034 | MVR | M36C05 | OK | 33.1294 | 11.324  | -1.54873  | 2.12559   | 0.03354 | 0.350737 |
| gene1651 | gene1651 | hisS      | gi 57650036 ref NC_002951.2 :1715049-1716312 | MVR | M36C05 | OK | 18.4624 | 6.0152  | -1.61791  | 2.34709   | 0.01892 | 0.250785 |
| gene1652 | gene1652 | SACOL1687 | gi 57650036 ref NC_002951.2 :1716772-1718097 | MVR | M36C05 | OK | 47.6222 | 87.7794 | 0.882249  | -0.878621 | 0.37961 | 0.999883 |
| gene1653 | gene1653 | SACOL1688 | gi 57650036 ref NC_002951.2 :1716772-1718097 | MVR | M36C05 | OK | 61.6972 | 172.712 | 1.48509   | -1.13492  | 0.25641 | 0.933885 |
| gene1654 | gene1654 | relA2     | gi 57650036 ref NC_002951.2 :1718108-1720298 | MVR | M36C05 | OK | 53.641  | 105.939 | 0.98182   | -1.1373   | 0.25541 | 0.93309  |
| gene1655 | gene1655 | apt       | gi 57650036 ref NC_002951.2 :1720725-1721244 | MVR | M36C05 | OK | 37.4008 | 23.8844 | -0.647001 | 0.950045  | 0.34209 | 0.999883 |
| gene1656 | gene1656 | recJ      | gi 57650036 ref NC_002951.2 :1721265-1723539 | MVR | M36C05 | OK | 12.7253 | 11.2645 | -0.175917 | 0.248137  | 0.80403 | 0.999883 |
| gene1657 | gene1657 | SACOL1692 | gi 57650036 ref NC_002951.2 :1723741-1726021 | MVR | M36C05 | OK | 95.9294 | 66.8091 | -0.521928 | 0.597572  | 0.55013 | 0.999883 |
| gene1658 | gene1658 | yajC      | gi 57650036 ref NC_002951.2 :1726295-1726556 | MVR | M36C05 | OK | 464.101 | 289.837 | -0.679195 | 0.953533  | 0.34032 | 0.999883 |
| gene1659 | gene1659 | tgt       | gi 57650036 ref NC_002951.2 :1726574-1727714 | MVR | M36C05 | OK | 66.0146 | 13.9579 | -2.2417   | 3.06277   | 0.00219 | 0.061515 |
| gene166  | gene166  | entB      | gi 57650036 ref NC_002951.2 :198037-198535   | MVR | M36C05 | OK | 7.87711 | 24.4555 | 1.63442   | -2.29481  | 0.02174 | 0.276559 |
| gene1660 | gene1660 | queA      | gi 57650036 ref NC_002951.2 :1727736-1728762 | MVR | M36C05 | OK | 31.4997 | 11.6144 | -1.43943  | 2.06984   | 0.03847 | 0.382368 |
| gene1661 | gene1661 | ruvB      | gi 57650036 ref NC_002951.2 :1728763-1729768 | MVR | M36C05 | OK | 59.4514 | 37.8078 | -0.653026 | 0.88278   | 0.37736 | 0.999883 |
| gene1662 | gene1662 | ruvA      | gi 57650036 ref NC_002951.2 :1729799-1730402 | MVR | M36C05 | OK | 43.0271 | 24.1049 | -0.835922 | 1.22022   | 0.22238 | 0.89416  |
| gene1663 | gene1663 | SACOL1698 | gi 57650036 ref NC_002951.2 :1730415-1730874 | MVR | M36C05 | OK | 24.7572 | 18.3227 | -0.434212 | 0.630829  | 0.52815 | 0.999883 |
| gene1664 | gene1664 | obgE      | gi 57650036 ref NC_002951.2 :1730883-1732176 | MVR | M36C05 | OK | 64.9391 | 47.8084 | -0.441824 | 0.568686  | 0.56957 | 0.999883 |
| gene1665 | gene1665 | rpmA      | gi 57650036 ref NC_002951.2 :1732530-1732815 | MVR | M36C05 | OK | 1647.91 | 686.172 | -1.26399  | 1.54196   | 0.12308 | 0.6962   |
| gene1666 | gene1666 | SACOL1701 | gi 57650036 ref NC_002951.2 :1732826-1733147 | MVR | M36C05 | OK | 173.233 | 65.371  | -1.40599  | 2.04465   | 0.04089 | 0.394682 |
| gene1667 | gene1667 | rplU      | gi 57650036 ref NC_002951.2 :1733152-1733461 | MVR | M36C05 | OK | 565.003 | 214.899 | -1.3946   | 1.88227   | 0.0598  | 0.491837 |
| gene1668 | gene1668 | SACOL1703 | gi 57650036 ref NC_002951.2 :1733627-1735000 | MVR | M36C05 | OK | 19.4017 | 12.343  | -0.652487 | 0.451799  | 0.65141 | 0.999883 |
| gene1669 | gene1669 | mreC      | gi 57650036 ref NC_002951.2 :1733627-1735000 | MVR | M36C05 | OK | 31.4562 | 20.4137 | -0.623808 | 0.777619  | 0.43679 | 0.999883 |
| gene167  | gene167  | ipdC      | gi 57650036 ref NC_002951.2 :198661-200302   | MVR | M36C05 | OK | 12.4652 | 26.9242 | 1.111     | -1.54816  | 0.12158 | 0.692837 |
| gene1670 | gene1670 | SACOL1705 | gi 57650036 ref NC_002951.2 :1735392-1735866 | MVR | M36C05 | OK | 27.0294 | 38.6788 | 0.517014  | -0.758665 | 0.44805 | 0.999883 |
| gene1671 | gene1671 | SACOL1706 | gi 57650036 ref NC_002951.2 :1736339-1736624 | MVR | M36C05 | OK | 268.347 | 124.549 | -1.10739  | 1.59958   | 0.10969 | 0.659073 |
| gene1672 | gene1672 | radC      | gi 57650036 ref NC_002951.2 :1736691-1738082 | MVR | M36C05 | OK | 5.3034  | 3.17227 | -0.741401 | 0.737597  | 0.46076 | 0.999883 |
| gene1673 | gene1673 | SACOL1708 | gi 57650036 ref NC_002951.2 :1736691-1738082 | MVR | M36C05 | OK | 5.19424 | 3.25812 | -0.672872 | 0.685317  | 0.49314 | 0.999883 |
| gene1674 | gene1674 | folC      | gi 57650036 ref NC_002951.2 :1738351-1739623 | MVR | M36C05 | OK | 47.9362 | 55.8416 | 0.220226  | -0.286476 | 0.77451 | 0.999883 |
| gene1675 | gene1675 | valS      | gi 57650036 ref NC_002951.2 :1739635-1742266 | MVR | M36C05 | OK | 58.9293 | 67.857  | 0.203513  | -0.23499  | 0.81422 | 0.999883 |
| gene1676 | gene1676 | SACOL1711 | gi 57650036 ref NC_002951.2 :1742668-1743229 | MVR | M36C05 | OK | 91.0209 | 103.681 | 0.187882  | -0.256815 | 0.79732 | 0.999883 |
| gene1677 | gene1677 | SACOL1712 | gi 57650036 ref NC_002951.2 :1743451-1744525 | MVR | M36C05 | OK | 33.987  | 65.0983 | 0.937638  | -1.25695  | 0.20877 | 0.885625 |
| gene1678 | gene1678 | hemL1     | gi 57650036 ref NC_002951.2 :1744720-1746007 | MVR | M36C05 | OK | 27.5087 | 20.9937 | -0.389931 | 0.547433  | 0.58408 | 0.999883 |

|          |          |           |                                              |     |        |        |         |         |            |           |         |           |
|----------|----------|-----------|----------------------------------------------|-----|--------|--------|---------|---------|------------|-----------|---------|-----------|
| gene1679 | gene1679 | hemB      | gi 57650036 ref NC_002951.2 :1746054-1747029 | MVR | M36C05 | OK     | 18.7656 | 17.2175 | -0.124219  | 0.18129   | 0.85614 | 0.999883  |
| gene168  | gene168  | SACOL0174 | gi 57650036 ref NC_002951.2 :200495-202621   | MVR | M36C05 | NOTEST | 0       | 0       | 0          | 0         | 1       | 1         |
| gene1680 | gene1680 | hemD      | gi 57650036 ref NC_002951.2 :1747031-1747700 | MVR | M36C05 | OK     | 8.01388 | 3.29425 | -1.28255   | 1.72606   | 0.08434 | 0.577972  |
| gene1681 | gene1681 | hemC      | gi 57650036 ref NC_002951.2 :1747721-1748648 | MVR | M36C05 | OK     | 30.444  | 8.79856 | -1.79082   | 2.58818   | 0.00965 | 0.163144  |
| gene1682 | gene1682 | SACOL1718 | gi 57650036 ref NC_002951.2 :1748689-1749505 | MVR | M36C05 | OK     | 26.964  | 17.7282 | -0.604988  | 0.882914  | 0.37728 | 0.999883  |
| gene1683 | gene1683 | hemA      | gi 57650036 ref NC_002951.2 :1749526-1750873 | MVR | M36C05 | OK     | 240.707 | 288.617 | 0.261877   | -0.282525 | 0.77754 | 0.999883  |
| gene1684 | gene1684 | engB      | gi 57650036 ref NC_002951.2 :1751089-1751680 | MVR | M36C05 | OK     | 11.3067 | 7.62321 | -0.568707  | 0.804827  | 0.42092 | 0.999883  |
| gene1685 | gene1685 | clpX      | gi 57650036 ref NC_002951.2 :1751833-1753096 | MVR | M36C05 | OK     | 271.082 | 219.555 | -0.304149  | 0.333069  | 0.73908 | 0.999883  |
| gene1686 | gene1686 | tig       | gi 57650036 ref NC_002951.2 :1753246-1754548 | MVR | M36C05 | OK     | 386.817 | 199.474 | -0.955448  | 1.03038   | 0.30283 | 0.987655  |
| gene1687 | gene1687 | SACOL1723 | gi 57650036 ref NC_002951.2 :1754710-1755640 | MVR | M36C05 | OK     | 24.6824 | 21.7548 | -0.182149  | 0.263803  | 0.79193 | 0.999883  |
| gene1688 | gene1688 | SACOL1724 | gi 57650036 ref NC_002951.2 :1755658-1756267 | MVR | M36C05 | OK     | 30.2123 | 26.4495 | -0.191894  | 0.281534  | 0.7783  | 0.999883  |
| gene1689 | gene1689 | rplT      | gi 57650036 ref NC_002951.2 :1756408-1756765 | MVR | M36C05 | OK     | 395.003 | 64.9686 | -2.60405   | 3.58521   | 0.00034 | 0.0147724 |
| gene169  | gene169  | SACOL0175 | gi 57650036 ref NC_002951.2 :200495-202621   | MVR | M36C05 | OK     | 11.7814 | 11.4027 | -0.0471349 | 0.067312  | 0.94633 | 0.999883  |
| gene1690 | gene1690 | rpmI      | gi 57650036 ref NC_002951.2 :1756811-1757012 | MVR | M36C05 | OK     | 96.8904 | 31.4399 | -1.62376   | 2.05746   | 0.03964 | 0.387684  |
| gene1691 | gene1691 | infC      | gi 57650036 ref NC_002951.2 :1757040-1757568 | MVR | M36C05 | OK     | 124.081 | 33.3282 | -1.89647   | 2.66651   | 0.00766 | 0.141495  |
| gene1692 | gene1692 | SACOL1728 | gi 57650036 ref NC_002951.2 :1757796-1759290 | MVR | M36C05 | OK     | 14.6445 | 52.8993 | 1.85289    | -2.49578  | 0.01257 | 0.192701  |
| gene1693 | gene1693 | thrS      | gi 57650036 ref NC_002951.2 :1759715-1761653 | MVR | M36C05 | OK     | 140.831 | 25.2379 | -2.48031   | 2.97637   | 0.00292 | 0.0762067 |
| gene1694 | gene1694 | dnaI      | gi 57650036 ref NC_002951.2 :1762065-1764386 | MVR | M36C05 | OK     | 102.185 | 87.0361 | -0.231502  | 0.182173  | 0.85545 | 0.999883  |
| gene1695 | gene1695 | SACOL1732 | gi 57650036 ref NC_002951.2 :1762065-1764386 | MVR | M36C05 | OK     | 60.4228 | 70.8581 | 0.22984    | -0.195267 | 0.84518 | 0.999883  |
| gene1696 | gene1696 | nrdR      | gi 57650036 ref NC_002951.2 :1764386-1764857 | MVR | M36C05 | OK     | 153.97  | 177.195 | 0.202684   | -0.270414 | 0.78684 | 0.999883  |
| gene1697 | gene1697 | gapA2     | gi 57650036 ref NC_002951.2 :1765066-1766092 | MVR | M36C05 | OK     | 506.911 | 524.249 | 0.0485185  | -0.050819 | 0.95947 | 0.999883  |
| gene1698 | gene1698 | coaE      | gi 57650036 ref NC_002951.2 :1766261-1766885 | MVR | M36C05 | OK     | 61.3774 | 52.3257 | -0.23019   | 0.326286  | 0.74421 | 0.999883  |
| gene1699 | gene1699 | fpg       | gi 57650036 ref NC_002951.2 :1766900-1767773 | MVR | M36C05 | OK     | 36.3997 | 41.1356 | 0.176461   | -0.24808  | 0.80407 | 0.999883  |
| gene17   | gene17   | purA      | gi 57650036 ref NC_002951.2 :22464-23748     | MVR | M36C05 | OK     | 32.5521 | 5.18668 | -2.64987   | 3.73275   | 0.00019 | 0.0095853 |
| gene170  | gene170  | SACOL0176 | gi 57650036 ref NC_002951.2 :203206-205158   | MVR | M36C05 | OK     | 14.5495 | 14.8137 | 0.0259639  | -0.029651 | 0.97635 | 0.999883  |
| gene1700 | gene1700 | polA      | gi 57650036 ref NC_002951.2 :1767788-1770419 | MVR | M36C05 | OK     | 49.2333 | 65.9079 | 0.420817   | -0.491607 | 0.623   | 0.999883  |
| gene1701 | gene1701 | SACOL1738 | gi 57650036 ref NC_002951.2 :1770712-1772200 | MVR | M36C05 | OK     | 7.17192 | 3.1665  | -1.17947   | 1.71183   | 0.08693 | 0.59079   |
| gene1702 | gene1702 | SACOL1739 | gi 57650036 ref NC_002951.2 :1772698-1775064 | MVR | M36C05 | OK     | 81.1355 | 44.765  | -0.857963  | 0.824208  | 0.40982 | 0.999883  |
| gene1703 | gene1703 | phoP      | gi 57650036 ref NC_002951.2 :1772698-1775064 | MVR | M36C05 | OK     | 97.604  | 78.0047 | -0.323379  | 0.215824  | 0.82913 | 0.999883  |
| gene1704 | gene1704 | icd       | gi 57650036 ref NC_002951.2 :1775453-1776722 | MVR | M36C05 | OK     | 867.062 | 1702.54 | 0.973479   | -1.00372  | 0.31551 | 0.999465  |
| gene1705 | gene1705 | gltA      | gi 57650036 ref NC_002951.2 :1776770-1777892 | MVR | M36C05 | OK     | 567.028 | 912.557 | 0.686494   | -0.705439 | 0.48054 | 0.999883  |
| gene1706 | gene1706 | SACOL1743 | gi 57650036 ref NC_002951.2 :1778239-1779601 | MVR | M36C05 | OK     | 188.456 | 225.975 | 0.261942   | -0.289032 | 0.77256 | 0.999883  |
| gene1707 | gene1707 | SACOL1744 | gi 57650036 ref NC_002951.2 :1779633-1781285 | MVR | M36C05 | NOTEST | 0.69628 | 0.835   | 0.262118   | -0.315793 | 0.75216 | 1         |

|          |          |           |                                              |     |        |        |         |         |            |           |         |           |
|----------|----------|-----------|----------------------------------------------|-----|--------|--------|---------|---------|------------|-----------|---------|-----------|
| gene1708 | gene1708 | pyk       | gi 57650036 ref NC_002951.2 :1781925-1783683 | MVR | M36C05 | OK     | 120.484 | 112.48  | -0.0991774 | 0.112545  | 0.91039 | 0.999883  |
| gene1709 | gene1709 | pfkA      | gi 57650036 ref NC_002951.2 :1783704-1784673 | MVR | M36C05 | OK     | 44.1913 | 56.3581 | 0.350859   | -0.474133 | 0.63541 | 0.999883  |
| gene171  | gene171  | murQ      | gi 57650036 ref NC_002951.2 :203206-205158   | MVR | M36C05 | OK     | 12.9752 | 7.87789 | -0.719873  | 0.6137    | 0.53941 | 0.999883  |
| gene1710 | gene1710 | accA      | gi 57650036 ref NC_002951.2 :1784941-1786743 | MVR | M36C05 | OK     | 51.7446 | 26.3493 | -0.973643  | 0.939887  | 0.34728 | 0.999883  |
| gene1711 | gene1711 | accD      | gi 57650036 ref NC_002951.2 :1784941-1786743 | MVR | M36C05 | OK     | 48.6047 | 25.8147 | -0.912904  | 0.809642  | 0.41815 | 0.999883  |
| gene1712 | gene1712 | SACOL1749 | gi 57650036 ref NC_002951.2 :1786937-1788167 | MVR | M36C05 | OK     | 40.7518 | 23.6549 | -0.784721  | 1.07878   | 0.28069 | 0.965951  |
| gene1713 | gene1713 | dnaE      | gi 57650036 ref NC_002951.2 :1788616-1791814 | MVR | M36C05 | OK     | 52.5927 | 27.8958 | -0.914814  | 1.09168   | 0.27498 | 0.960416  |
| gene1714 | gene1714 | SACOL1751 | gi 57650036 ref NC_002951.2 :1791834-1792776 | MVR | M36C05 | OK     | 59.535  | 37.1573 | -0.680092  | 0.927748  | 0.35354 | 0.999883  |
| gene1715 | gene1715 | SACOL1752 | gi 57650036 ref NC_002951.2 :1793036-1794335 | MVR | M36C05 | OK     | 33.186  | 36.513  | 0.137834   | -0.186243 | 0.85225 | 0.999883  |
| gene1716 | gene1716 | SACOL1753 | gi 57650036 ref NC_002951.2 :1794539-1794953 | MVR | M36C05 | OK     | 547.266 | 361.602 | -0.597841  | 0.733914  | 0.463   | 0.999883  |
| gene1717 | gene1717 | SACOL1754 | gi 57650036 ref NC_002951.2 :1795257-1795946 | MVR | M36C05 | OK     | 64.7503 | 237.171 | 1.87297    | -2.39213  | 0.01675 | 0.231351  |
| gene1718 | gene1718 | pepQ      | gi 57650036 ref NC_002951.2 :1796120-1797176 | MVR | M36C05 | OK     | 32.0511 | 42.7666 | 0.41611    | -0.573328 | 0.56642 | 0.999883  |
| gene1719 | gene1719 | SACOL1757 | gi 57650036 ref NC_002951.2 :1797269-1797368 | MVR | M36C05 | NOTEST | 0       | 0       | 0          | 0         | 1       | 1         |
| gene172  | gene172  | SACOL0178 | gi 57650036 ref NC_002951.2 :205169-206624   | MVR | M36C05 | OK     | 23.4702 | 16.6005 | -0.499608  | 0.704226  | 0.48129 | 0.999883  |
| gene1720 | gene1720 | ald2      | gi 57650036 ref NC_002951.2 :1797491-1798610 | MVR | M36C05 | OK     | 305.929 | 75.3451 | -2.02161   | 2.36073   | 0.01824 | 0.244437  |
| gene1721 | gene1721 | SACOL1759 | gi 57650036 ref NC_002951.2 :1798750-1799251 | MVR | M36C05 | OK     | 935.132 | 1668.79 | 0.835559   | -0.888719 | 0.37415 | 0.999883  |
| gene1722 | gene1722 | ackA      | gi 57650036 ref NC_002951.2 :1799496-1800699 | MVR | M36C05 | OK     | 166.844 | 157.845 | -0.0799966 | 0.091869  | 0.9268  | 0.999883  |
| gene1723 | gene1723 | SACOL1761 | gi 57650036 ref NC_002951.2 :1800786-1801734 | MVR | M36C05 | OK     | 85.13   | 202.134 | 1.24757    | -1.51633  | 0.12944 | 0.7118    |
| gene1724 | gene1724 | tpx       | gi 57650036 ref NC_002951.2 :1801856-1802351 | MVR | M36C05 | OK     | 684.409 | 973.56  | 0.508411   | -0.562481 | 0.57379 | 0.999883  |
| gene1725 | gene1725 | SACOL1763 | gi 57650036 ref NC_002951.2 :1802448-1803219 | MVR | M36C05 | OK     | 14.9647 | 4.83017 | -1.63142   | 2.32658   | 0.01999 | 0.260836  |
| gene1726 | gene1726 | thiI      | gi 57650036 ref NC_002951.2 :1803262-1805625 | MVR | M36C05 | OK     | 10.8193 | 5.59851 | -0.950487  | 1.06461   | 0.28705 | 0.975303  |
| gene1727 | gene1727 | SACOL1765 | gi 57650036 ref NC_002951.2 :1803262-1805625 | MVR | M36C05 | OK     | 8.68277 | 3.87068 | -1.16557   | 1.07969   | 0.28028 | 0.965951  |
| gene1728 | gene1728 | SACOL1766 | gi 57650036 ref NC_002951.2 :1805782-1805923 | MVR | M36C05 | NOTEST | 0       | 0       | 0          | 0         | 1       | 1         |
| gene1729 | gene1729 | SACOL1767 | gi 57650036 ref NC_002951.2 :1805996-1807691 | MVR | M36C05 | OK     | 126.915 | 130.05  | 0.0352034  | -0.039713 | 0.96832 | 0.999883  |
| gene173  | gene173  | SACOL0179 | gi 57650036 ref NC_002951.2 :206626-207502   | MVR | M36C05 | OK     | 16.2328 | 11.0948 | -0.549029  | 0.80639   | 0.42002 | 0.999883  |
| gene1730 | gene1730 | SACOL1768 | gi 57650036 ref NC_002951.2 :1807827-1808292 | MVR | M36C05 | OK     | 7.72933 | 9.99649 | 0.371078   | -0.500828 | 0.61649 | 0.999883  |
| gene1731 | gene1731 | rpsD      | gi 57650036 ref NC_002951.2 :1808535-1809138 | MVR | M36C05 | OK     | 373.056 | 66.8362 | -2.48069   | 3.14066   | 0.00169 | 0.0508301 |
| gene1732 | gene1732 | SACOL1770 | gi 57650036 ref NC_002951.2 :1809353-1810097 | MVR | M36C05 | OK     | 2.58607 | 2.23092 | -0.21312   | 0.264532  | 0.79137 | 0.999883  |
| gene1733 | gene1733 | SACOL1771 | gi 57650036 ref NC_002951.2 :1810176-1810623 | MVR | M36C05 | OK     | 16.4139 | 66.1029 | 2.0098     | -2.88593  | 0.0039  | 0.0922789 |
| gene1734 | gene1734 | SACOL1772 | gi 57650036 ref NC_002951.2 :1810736-1813488 | MVR | M36C05 | OK     | 11.8586 | 51.3982 | 2.11579    | -1.77418  | 0.07603 | 0.546428  |
| gene1735 | gene1735 | serA      | gi 57650036 ref NC_002951.2 :1810736-1813488 | MVR | M36C05 | OK     | 11.8583 | 44.2459 | 1.89964    | -1.84841  | 0.06454 | 0.508201  |
| gene1736 | gene1736 | SACOL1774 | gi 57650036 ref NC_002951.2 :1813637-1814768 | MVR | M36C05 | OK     | 37.5257 | 46.8976 | 0.321635   | -0.433732 | 0.66448 | 0.999883  |
| gene1737 | gene1737 | SACOL1775 | gi 57650036 ref NC_002951.2 :1814874-1816341 | MVR | M36C05 | OK     | 29.3604 | 16.5301 | -0.828776  | 1.1533    | 0.24879 | 0.922459  |

|          |          |           |                                              |     |        |        |         |         |            |           |          |           |
|----------|----------|-----------|----------------------------------------------|-----|--------|--------|---------|---------|------------|-----------|----------|-----------|
| gene1738 | gene1738 | SACOL1776 | gi 57650036 ref NC_002951.2 :1816468-1817086 | MVR | M36C05 | OK     | 48.3649 | 14.2598 | -1.762     | 2.55379   | 0.01066  | 0.173684  |
| gene1739 | gene1739 | SACOL1777 | gi 57650036 ref NC_002951.2 :1817257-1818532 | MVR | M36C05 | OK     | 29.3251 | 51.9938 | 0.826202   | -1.10528  | 0.26904  | 0.952424  |
| gene174  | gene174  | SACOL0180 | gi 57650036 ref NC_002951.2 :208189-210979   | MVR | M36C05 | OK     | 16.025  | 8.29628 | -0.949785  | 1.31179   | 0.18959  | 0.848649  |
| gene1740 | gene1740 | tyrS      | gi 57650036 ref NC_002951.2 :1818625-1819888 | MVR | M36C05 | OK     | 21.896  | 5.80778 | -1.91461   | 2.75896   | 0.0058   | 0.118414  |
| gene1741 | gene1741 | SACOL1779 | gi 57650036 ref NC_002951.2 :1820269-1821175 | MVR | M36C05 | OK     | 18.7772 | 15.3093 | -0.294573  | 0.431654  | 0.66599  | 0.999883  |
| gene1742 | gene1742 | SACOL1781 | gi 57650036 ref NC_002951.2 :1821377-1824065 | MVR | M36C05 | OK     | 6.10083 | 4.20753 | -0.536031  | 0.783506  | 0.43333  | 0.999883  |
| gene1743 | gene1743 | fhs       | gi 57650036 ref NC_002951.2 :1824398-1826066 | MVR | M36C05 | OK     | 336.019 | 226.371 | -0.569857  | 0.599789  | 0.54865  | 0.999883  |
| gene1744 | gene1744 | acs       | gi 57650036 ref NC_002951.2 :1826505-1828212 | MVR | M36C05 | OK     | 384.568 | 834.789 | 1.11817    | -1.14875  | 0.25066  | 0.925525  |
| gene1745 | gene1745 | acuA      | gi 57650036 ref NC_002951.2 :1828380-1829013 | MVR | M36C05 | OK     | 63.0302 | 52.2556 | -0.270458  | 0.382214  | 0.7023   | 0.999883  |
| gene1746 | gene1746 | acuC      | gi 57650036 ref NC_002951.2 :1829037-1830207 | MVR | M36C05 | OK     | 69.9182 | 51.4892 | -0.4414    | 0.571047  | 0.56797  | 0.999883  |
| gene1747 | gene1747 | ccpA      | gi 57650036 ref NC_002951.2 :1830304-1831294 | MVR | M36C05 | OK     | 334.605 | 321.054 | -0.0596429 | 0.065352  | 0.94789  | 0.999883  |
| gene1748 | gene1748 | SACOL1787 | gi 57650036 ref NC_002951.2 :1831833-1832925 | MVR | M36C05 | OK     | 66.3627 | 126.084 | 0.925935   | -1.15032  | 0.25001  | 0.924551  |
| gene1749 | gene1749 | SACOL1788 | gi 57650036 ref NC_002951.2 :1833624-1835142 | MVR | M36C05 | OK     | 70.6896 | 361.875 | 2.35592    | -2.64055  | 0.00828  | 0.148512  |
| gene175  | gene175  | SACOL0181 | gi 57650036 ref NC_002951.2 :211183-212026   | MVR | M36C05 | OK     | 51.1045 | 35.6811 | -0.518292  | 0.724488  | 0.46877  | 0.999883  |
| gene1750 | gene1750 | SACOL1789 | gi 57650036 ref NC_002951.2 :1835215-1835707 | MVR | M36C05 | OK     | 442.383 | 2228.77 | 2.33288    | -2.56084  | 0.01044  | 0.17225   |
| gene1751 | gene1751 | murC      | gi 57650036 ref NC_002951.2 :1835780-1837094 | MVR | M36C05 | OK     | 84.8284 | 59.2763 | -0.517091  | 0.64584   | 0.51838  | 0.999883  |
| gene1752 | gene1752 | SACOL1791 | gi 57650036 ref NC_002951.2 :1837117-1840942 | MVR | M36C05 | OK     | 46.7173 | 33.3127 | -0.487884  | 0.567811  | 0.57016  | 0.999883  |
| gene1753 | gene1753 | SACOL1792 | gi 57650036 ref NC_002951.2 :1840962-1841559 | MVR | M36C05 | OK     | 23.034  | 19.4646 | -0.242911  | 0.35708   | 0.72103  | 0.999883  |
| gene1754 | gene1754 | SACOL1793 | gi 57650036 ref NC_002951.2 :1841587-1842445 | MVR | M36C05 | OK     | 30.5278 | 19.6125 | -0.638354  | 0.925314  | 0.3548   | 0.999883  |
| gene1755 | gene1755 | SACOL1794 | gi 57650036 ref NC_002951.2 :1842544-1842856 | MVR | M36C05 | OK     | 134.581 | 223.179 | 0.729723   | -1.04325  | 0.29684  | 0.9791    |
| gene1756 | gene1756 | pepA1     | gi 57650036 ref NC_002951.2 :1842920-1843997 | MVR | M36C05 | OK     | 77.1274 | 92.5355 | 0.262763   | -0.330951 | 0.74068  | 0.999883  |
| gene1757 | gene1757 | SACOL1796 | gi 57650036 ref NC_002951.2 :1844083-1844395 | MVR | M36C05 | OK     | 434.538 | 396.143 | -0.133462  | 0.176846  | 0.85963  | 0.999883  |
| gene1758 | gene1758 | SACOL1797 | gi 57650036 ref NC_002951.2 :1844519-1845296 | MVR | M36C05 | OK     | 21.8864 | 30.5912 | 0.483079   | -0.702627 | 0.48229  | 0.999883  |
| gene1759 | gene1759 | trmB      | gi 57650036 ref NC_002951.2 :1845831-1846476 | MVR | M36C05 | OK     | 130.525 | 73.6615 | -0.825348  | 1.10187   | 0.27052  | 0.954062  |
| gene176  | gene176  | SACOL0182 | gi 57650036 ref NC_002951.2 :212027-214050   | MVR | M36C05 | NOTEST | 0       | 0       | 0          | 0         | 1        | 1         |
| gene1760 | gene1760 | SACOL1799 | gi 57650036 ref NC_002951.2 :1846490-1847282 | MVR | M36C05 | OK     | 128.058 | 94.8487 | -0.433099  | 0.553872  | 0.57967  | 0.999883  |
| gene1761 | gene1761 | dat       | gi 57650036 ref NC_002951.2 :1847831-1848680 | MVR | M36C05 | OK     | 115.262 | 144.462 | 0.325778   | -0.404573 | 0.68579  | 0.999883  |
| gene1762 | gene1762 | SACOL1801 | gi 57650036 ref NC_002951.2 :1848683-1850093 | MVR | M36C05 | OK     | 62.2328 | 104.949 | 0.753948   | -0.917388 | 0.35894  | 0.999883  |
| gene1763 | gene1763 | SACOL1802 | gi 57650036 ref NC_002951.2 :1851012-1851435 | MVR | M36C05 | OK     | 26.4529 | 226.759 | 3.09966    | -4.27045  | 1.95E-05 | 0.0013978 |
| gene1764 | gene1764 | SACOL1803 | gi 57650036 ref NC_002951.2 :1851451-1853805 | MVR | M36C05 | OK     | 40.3801 | 15.3506 | -1.39535   | 0.917693  | 0.35878  | 0.999883  |
| gene1765 | gene1765 | SACOL1804 | gi 57650036 ref NC_002951.2 :1851451-1853805 | MVR | M36C05 | OK     | 31.318  | 19.4506 | -0.68718   | 0.778815  | 0.43609  | 0.999883  |
| gene1766 | gene1766 | SACOL1805 | gi 57650036 ref NC_002951.2 :1854211-1855480 | MVR | M36C05 | OK     | 19.4198 | 8.35336 | -1.2171    | 1.76638   | 0.07733  | 0.552795  |
| gene1767 | gene1767 | SACOL1806 | gi 57650036 ref NC_002951.2 :1855596-1862157 | MVR | M36C05 | OK     | 3.06465 | 2.80577 | -0.127323  | 0.183367  | 0.85451  | 0.999883  |

|          |          |           |                                              |     |        |        |         |         |           |           |         |           |
|----------|----------|-----------|----------------------------------------------|-----|--------|--------|---------|---------|-----------|-----------|---------|-----------|
| gene1768 | gene1768 | SACOL1807 | gi 57650036 ref NC_002951.2 :1862482-1862794 | MVR | M36C05 | OK     | 20.5294 | 7.4393  | -1.46445  | 1.80967   | 0.07035 | 0.522414  |
| gene1769 | gene1769 | leuS      | gi 57650036 ref NC_002951.2 :1862815-1865233 | MVR | M36C05 | OK     | 22.4474 | 11.1788 | -1.00579  | 1.36828   | 0.17122 | 0.816303  |
| gene177  | gene177  | SACOL0183 | gi 57650036 ref NC_002951.2 :212027-214050   | MVR | M36C05 | NOTEST | 0       | 0       | 0         | 0         | 1       | 1         |
| gene1770 | gene1770 | SACOL1809 | gi 57650036 ref NC_002951.2 :1865520-1866702 | MVR | M36C05 | OK     | 24.3572 | 8.30816 | -1.55175  | 2.23946   | 0.02513 | 0.301055  |
| gene1771 | gene1771 | SACOL1810 | gi 57650036 ref NC_002951.2 :1866811-1868325 | MVR | M36C05 | OK     | 26.6749 | 52.3614 | 0.97302   | -1.05493  | 0.29146 | 0.975616  |
| gene1772 | gene1772 | SACOL1811 | gi 57650036 ref NC_002951.2 :1866811-1868325 | MVR | M36C05 | OK     | 25.9494 | 61.8771 | 1.25371   | -0.972539 | 0.33078 | 0.999883  |
| gene1773 | gene1773 | rot       | gi 57650036 ref NC_002951.2 :1868444-1868945 | MVR | M36C05 | OK     | 250.211 | 681.236 | 1.44501   | -1.7149   | 0.08636 | 0.588521  |
| gene1774 | gene1774 | SACOL1813 | gi 57650036 ref NC_002951.2 :1869365-1870078 | MVR | M36C05 | OK     | 1.79343 | 2.79614 | 0.640716  | -0.771497 | 0.44041 | 0.999883  |
| gene1775 | gene1775 | SACOL1814 | gi 57650036 ref NC_002951.2 :1870424-1871252 | MVR | M36C05 | OK     | 105.714 | 116.454 | 0.139586  | -0.177223 | 0.85933 | 0.999883  |
| gene1776 | gene1776 | SACOL1815 | gi 57650036 ref NC_002951.2 :1871254-1871374 | MVR | M36C05 | NOTEST | 0       | 0       | 0         | 0         | 1       | 1         |
| gene1777 | gene1777 | putA      | gi 57650036 ref NC_002951.2 :1871485-1872487 | MVR | M36C05 | OK     | 149.201 | 125.948 | -0.244433 | 0.293677  | 0.76901 | 0.999883  |
| gene1778 | gene1778 | ribH      | gi 57650036 ref NC_002951.2 :1872608-1873073 | MVR | M36C05 | OK     | 4.83083 | 7.08085 | 0.551651  | -0.699653 | 0.48414 | 0.999883  |
| gene1779 | gene1779 | ribBA     | gi 57650036 ref NC_002951.2 :1873085-1874267 | MVR | M36C05 | OK     | 5.55516 | 7.85907 | 0.50053   | -0.731673 | 0.46437 | 0.999883  |
| gene178  | gene178  | SACOL0184 | gi 57650036 ref NC_002951.2 :214314-215907   | MVR | M36C05 | OK     | 9.74068 | 6.0136  | -0.695793 | 1.01974   | 0.30785 | 0.991033  |
| gene1780 | gene1780 | ribE      | gi 57650036 ref NC_002951.2 :1874277-1874910 | MVR | M36C05 | OK     | 4.00192 | 5.60792 | 0.486774  | -0.647125 | 0.51755 | 0.999883  |
| gene1781 | gene1781 | ribD      | gi 57650036 ref NC_002951.2 :1874916-1875960 | MVR | M36C05 | OK     | 5.56263 | 10.5825 | 0.927844  | -1.3515   | 0.17654 | 0.821477  |
| gene1782 | gene1782 | SACOL1821 | gi 57650036 ref NC_002951.2 :1876440-1877943 | MVR | M36C05 | OK     | 3.56678 | 21.4872 | 2.59079   | -3.67366  | 0.00024 | 0.0111637 |
| gene1783 | gene1783 | arsR      | gi 57650036 ref NC_002951.2 :1878465-1880072 | MVR | M36C05 | OK     | 19.5079 | 20.9241 | 0.101107  | -0.072691 | 0.94205 | 0.999883  |
| gene1784 | gene1784 | arsB      | gi 57650036 ref NC_002951.2 :1878465-1880072 | MVR | M36C05 | OK     | 7.49508 | 5.64825 | -0.408141 | 0.51957   | 0.60336 | 0.999883  |
| gene1785 | gene1785 | arsC      | gi 57650036 ref NC_002951.2 :1880089-1880485 | MVR | M36C05 | OK     | 10.6601 | 9.52357 | -0.162644 | 0.21493   | 0.82982 | 0.999883  |
| gene1786 | gene1786 | SACOL1825 | gi 57650036 ref NC_002951.2 :1880779-1881634 | MVR | M36C05 | OK     | 219.529 | 233.061 | 0.0862954 | -0.100201 | 0.92019 | 0.999883  |
| gene1787 | gene1787 | SACOL1826 | gi 57650036 ref NC_002951.2 :1881909-1882134 | MVR | M36C05 | OK     | 130.665 | 136.575 | 0.0638223 | -0.093161 | 0.92578 | 0.999883  |
| gene1788 | gene1788 | SACOL1827 | gi 57650036 ref NC_002951.2 :1882332-1882803 | MVR | M36C05 | OK     | 5.42315 | 8.96158 | 0.724621  | -0.946505 | 0.34389 | 0.999883  |
| gene1789 | gene1789 | SACOL1828 | gi 57650036 ref NC_002951.2 :1882915-1883789 | MVR | M36C05 | OK     | 17.4228 | 22.1518 | 0.346445  | -0.255693 | 0.79819 | 0.999883  |
| gene179  | gene179  | SACOL0185 | gi 57650036 ref NC_002951.2 :216034-217342   | MVR | M36C05 | OK     | 5.34123 | 5.77071 | 0.111579  | -0.163075 | 0.87046 | 0.999883  |
| gene1790 | gene1790 | SACOL1829 | gi 57650036 ref NC_002951.2 :1882915-1883789 | MVR | M36C05 | OK     | 43.2931 | 69.1679 | 0.675965  | -0.835291 | 0.40355 | 0.999883  |
| gene1791 | gene1791 | SACOL1830 | gi 57650036 ref NC_002951.2 :1884084-1884720 | MVR | M36C05 | OK     | 4.25659 | 3.79722 | -0.164754 | 0.214677  | 0.83002 | 0.999883  |
| gene1792 | gene1792 | tal       | gi 57650036 ref NC_002951.2 :1885159-1885873 | MVR | M36C05 | OK     | 267.272 | 1026.97 | 1.94202   | -2.13086  | 0.0331  | 0.34869   |
| gene1793 | gene1793 | crcB      | gi 57650036 ref NC_002951.2 :1886612-1887406 | MVR | M36C05 | OK     | 5.01567 | 12.2061 | 1.28309   | -1.27787  | 0.20129 | 0.870048  |
| gene1794 | gene1794 | SACOL1833 | gi 57650036 ref NC_002951.2 :1886612-1887406 | MVR | M36C05 | OK     | 11.0643 | 11.2572 | 0.0249324 | -0.023679 | 0.98111 | 0.999883  |
| gene1795 | gene1795 | SACOL1834 | gi 57650036 ref NC_002951.2 :1887816-1889426 | MVR | M36C05 | NOTEST | 0.37979 | 0.46903 | 0.304498  | -0.317812 | 0.75063 | 1         |
| gene1796 | gene1796 | SACOL1835 | gi 57650036 ref NC_002951.2 :1889488-1890322 | MVR | M36C05 | OK     | 35.7543 | 65.7652 | 0.879206  | -1.21281  | 0.2252  | 0.89446   |
| gene1797 | gene1797 | SACOL1836 | gi 57650036 ref NC_002951.2 :1890533-1891442 | MVR | M36C05 | OK     | 141.877 | 102.044 | -0.475444 | 0.588952  | 0.55589 | 0.999883  |



|          |          |             |                                              |     |        |        |         |         |            |           |         |          |
|----------|----------|-------------|----------------------------------------------|-----|--------|--------|---------|---------|------------|-----------|---------|----------|
| gene1798 | gene1798 | metK        | gi 57650036 ref NC_002951.2 :1891566-1892760 | MVR | M36C05 | OK     | 38.0434 | 14.3081 | -1.41081   | 1.97991   | 0.04771 | 0.429484 |
| gene1799 | gene1799 | pckA        | gi 57650036 ref NC_002951.2 :1893130-1894723 | MVR | M36C05 | OK     | 504.593 | 397.927 | -0.342618  | 0.351919  | 0.7249  | 0.999883 |
| gene18   | gene18   | SACOL_tRNA- | gi 57650036 ref NC_002951.2 :24177-24252     | MVR | M36C05 | NOTEST | 0       | 0       | 0          | 0         | 1       | 1        |
| gene180  | gene180  | SACOL0186   | gi 57650036 ref NC_002951.2 :217347-218511   | MVR | M36C05 | OK     | 2.98629 | 3.8886  | 0.380899   | -0.535569 | 0.59226 | 0.999883 |
| gene1800 | gene1800 | SACOL1839   | gi 57650036 ref NC_002951.2 :1894858-1895344 | MVR | M36C05 | OK     | 103.914 | 219.28  | 1.07739    | -1.43978  | 0.14993 | 0.752459 |
| gene1801 | gene1801 | SACOL1840   | gi 57650036 ref NC_002951.2 :1895718-1896949 | MVR | M36C05 | OK     | 10.3684 | 5.02338 | -1.04546   | 1.19608   | 0.23167 | 0.902162 |
| gene1802 | gene1802 | SACOL1841   | gi 57650036 ref NC_002951.2 :1895718-1896949 | MVR | M36C05 | OK     | 11.3822 | 7.49176 | -0.603407  | 0.540919  | 0.58856 | 0.999883 |
| gene1803 | gene1803 | SACOL1842   | gi 57650036 ref NC_002951.2 :1897008-1898264 | MVR | M36C05 | OK     | 634.836 | 611.902 | -0.0530836 | 0.057128  | 0.95444 | 0.999883 |
| gene1804 | gene1804 | SACOL1843   | gi 57650036 ref NC_002951.2 :1897008-1898264 | MVR | M36C05 | OK     | 18.0395 | 28.3245 | 0.650897   | -0.454587 | 0.64941 | 0.999883 |
| gene1805 | gene1805 | SACOL1844   | gi 57650036 ref NC_002951.2 :1898268-1899747 | MVR | M36C05 | OK     | 16.6836 | 28.8716 | 0.791221   | -1.10035  | 0.27118 | 0.954536 |
| gene1806 | gene1806 | SACOL1845   | gi 57650036 ref NC_002951.2 :1899905-1900388 | MVR | M36C05 | OK     | 15.5285 | 7.80274 | -0.992864  | 1.3796    | 0.16771 | 0.806453 |
| gene1807 | gene1807 | SACOL1846   | gi 57650036 ref NC_002951.2 :1900663-1901314 | MVR | M36C05 | OK     | 145.122 | 312.009 | 1.10432    | -1.34778  | 0.17773 | 0.821737 |
| gene1808 | gene1808 | SACOL1847   | gi 57650036 ref NC_002951.2 :1901394-1902390 | MVR | M36C05 | OK     | 299.055 | 489.03  | 0.709513   | -0.765447 | 0.44401 | 0.999883 |
| gene1809 | gene1809 | SACOL1848   | gi 57650036 ref NC_002951.2 :1902465-1903092 | MVR | M36C05 | OK     | 10.5887 | 3.36042 | -1.65581   | 2.22564   | 0.02604 | 0.306341 |
| gene181  | gene181  | SACOL0187   | gi 57650036 ref NC_002951.2 :218527-220303   | MVR | M36C05 | OK     | 3.1656  | 2.23787 | -0.500351  | 0.716972  | 0.47339 | 0.999883 |
| gene1810 | gene1810 | SACOL1849   | gi 57650036 ref NC_002951.2 :1903132-1903477 | MVR | M36C05 | OK     | 10.827  | 2.23011 | -2.27944   | 2.34012   | 0.01928 | 0.25412  |
| gene1811 | gene1811 | SACOL1850   | gi 57650036 ref NC_002951.2 :1903574-1904126 | MVR | M36C05 | OK     | 12.4675 | 2.82307 | -2.14284   | 2.76173   | 0.00575 | 0.118209 |
| gene1812 | gene1812 | SACOL1851   | gi 57650036 ref NC_002951.2 :1904343-1904985 | MVR | M36C05 | OK     | 6.4332  | 6.24263 | -0.0433831 | 0.060045  | 0.95212 | 0.999883 |
| gene1813 | gene1813 | SACOL1853   | gi 57650036 ref NC_002951.2 :1905285-1905462 | MVR | M36C05 | NOTEST | 0       | 0       | 0          | 0         | 1       | 1        |
| gene1814 | gene1814 | SACOL1854   | gi 57650036 ref NC_002951.2 :1905472-1905856 | MVR | M36C05 | OK     | 12.8051 | 21.4291 | 0.742847   | -1.02843  | 0.30375 | 0.988652 |
| gene1815 | gene1815 | SACOL1855   | gi 57650036 ref NC_002951.2 :1905957-1906735 | MVR | M36C05 | OK     | 9.39313 | 16.0325 | 0.771325   | -1.12734  | 0.2596  | 0.938894 |
| gene1816 | gene1816 | SACOL1857   | gi 57650036 ref NC_002951.2 :1907605-1907983 | MVR | M36C05 | OK     | 3.31212 | 5.52918 | 0.739311   | -0.80455  | 0.42108 | 0.999883 |
| gene1817 | gene1817 | SACOL1858   | gi 57650036 ref NC_002951.2 :1908503-1909064 | MVR | M36C05 | OK     | 2.08048 | 6.11687 | 1.55588    | -1.86799  | 0.06176 | 0.502797 |
| gene1818 | gene1818 | SACOL1859   | gi 57650036 ref NC_002951.2 :1909268-1912319 | MVR | M36C05 | OK     | 1.20007 | 1.19812 | -0.0023428 | 0.003312  | 0.99736 | 0.999883 |
| gene1819 | gene1819 | SACOL1860   | gi 57650036 ref NC_002951.2 :1912385-1912616 | MVR | M36C05 | NOTEST | 0       | 0       | 0          | 0         | 1       | 1        |
| gene182  | gene182  | ggt         | gi 57650036 ref NC_002951.2 :220340-222347   | MVR | M36C05 | OK     | 3.37881 | 4.26924 | 0.337464   | -0.494491 | 0.62096 | 0.999883 |
| gene1820 | gene1820 | hsdS        | gi 57650036 ref NC_002951.2 :1913465-1916214 | MVR | M36C05 | OK     | 6.65114 | 7.82774 | 0.234993   | -0.179215 | 0.85777 | 0.999883 |
| gene1821 | gene1821 | hsdM2       | gi 57650036 ref NC_002951.2 :1913465-1916214 | MVR | M36C05 | OK     | 11.2322 | 14.6208 | 0.380383   | -0.451449 | 0.65167 | 0.999883 |
| gene1822 | gene1822 | SACOL1863   | gi 57650036 ref NC_002951.2 :1916377-1916512 | MVR | M36C05 | NOTEST | 0       | 0       | 0          | 0         | 1       | 1        |
| gene1823 | gene1823 | SACOL1864   | gi 57650036 ref NC_002951.2 :1916576-1917296 | MVR | M36C05 | OK     | 2.12176 | 1.27312 | -0.736887  | 0.833304  | 0.40467 | 0.999883 |
| gene1824 | gene1824 | SACOL1865   | gi 57650036 ref NC_002951.2 :1917446-1918163 | MVR | M36C05 | NOTEST | 0.71155 | 0.64026 | -0.15231   | 0.136386  | 0.89152 | 1        |
| gene1825 | gene1825 | SACOL1866   | gi 57650036 ref NC_002951.2 :1918320-1919040 | MVR | M36C05 | OK     | 1.06088 | 0.63656 | -0.736887  | 0.695997  | 0.48643 | 0.999883 |
| gene1826 | gene1826 | splC        | gi 57650036 ref NC_002951.2 :1919160-1919880 | MVR | M36C05 | OK     | 0.943   | 1.06094 | 0.170004   | -0.170678 | 0.86448 | 0.999883 |

|          |          |             |                                              |     |        |        |         |         |             |             |          |           |
|----------|----------|-------------|----------------------------------------------|-----|--------|--------|---------|---------|-------------|-------------|----------|-----------|
| gene1827 | gene1827 | spIB        | gi 57650036 ref NC_002951.2 :1919937-1920660 | MVR | M36C05 | OK     | 1.17167 | 1.89871 | 0.696455    | -0.769828   | 0.4414   | 0.999883  |
| gene1828 | gene1828 | spIA        | gi 57650036 ref NC_002951.2 :1920784-1921501 | MVR | M36C05 | OK     | 2.01607 | 1.28052 | -0.654811   | 0.736537    | 0.4614   | 0.999883  |
| gene1829 | gene1829 | SACOL1870   | gi 57650036 ref NC_002951.2 :1922464-1923031 | MVR | M36C05 | OK     | 1.87389 | 2.40669 | 0.361017    | -0.399722   | 0.68936  | 0.999883  |
| gene183  | gene183  | SACOL0189   | gi 57650036 ref NC_002951.2 :222644-223418   | MVR | M36C05 | NOTEST | 0       | 0       | 0           | 0           | 1        | 1         |
| gene1830 | gene1830 | epiG        | gi 57650036 ref NC_002951.2 :1923504-1925650 | MVR | M36C05 | OK     | 15.0162 | 161.648 | 3.42826     | -2.21751    | 0.02659  | 0.309278  |
| gene1831 | gene1831 | epiE        | gi 57650036 ref NC_002951.2 :1923504-1925650 | MVR | M36C05 | OK     | 14.3455 | 148.014 | 3.36707     | -2.22898    | 0.02582  | 0.304771  |
| gene1832 | gene1832 | epiF        | gi 57650036 ref NC_002951.2 :1923504-1925650 | MVR | M36C05 | OK     | 16.2054 | 280.457 | 4.11323     | -3.18219    | 0.00146  | 0.0454837 |
| gene1833 | gene1833 | epiP        | gi 57650036 ref NC_002951.2 :1925672-1927046 | MVR | M36C05 | OK     | 4.9839  | 68.1696 | 3.77378     | -5.05699    | 4.26E-07 | 5.82E-05  |
| gene1834 | gene1834 | epiD        | gi 57650036 ref NC_002951.2 :1927055-1927574 | MVR | M36C05 | OK     | 0.39578 | 2.0769  | 2.39168     | -1.60645    | 0.10817  | 0.653986  |
| gene1835 | gene1835 | epiC        | gi 57650036 ref NC_002951.2 :1927589-1931820 | MVR | M36C05 | OK     | 0.91648 | 1.47698 | 0.688473    | -0.628504   | 0.52967  | 0.999883  |
| gene1836 | gene1836 | epiB        | gi 57650036 ref NC_002951.2 :1927589-1931820 | MVR | M36C05 | NOTEST | 0.42233 | 0.67044 | 0.666738    | -0.678894   | 0.49721  | 1         |
| gene1837 | gene1837 | epiA        | gi 57650036 ref NC_002951.2 :1931884-1932028 | MVR | M36C05 | OK     | 0       | 74.8453 | 1.79769e+30 | 1.79769e+30 | 0.03514  | 0.35865   |
| gene1838 | gene1838 | SACOL1879   | gi 57650036 ref NC_002951.2 :1932919-1934239 | MVR | M36C05 | OK     | 1.01386 | 0.49214 | -1.04272    | 1.15405     | 0.24848  | 0.922459  |
| gene1839 | gene1839 | lukD        | gi 57650036 ref NC_002951.2 :1934670-1935654 | MVR | M36C05 | OK     | 2.53915 | 3.51645 | 0.469774    | -0.63679    | 0.52426  | 0.999883  |
| gene184  | gene184  | acpD        | gi 57650036 ref NC_002951.2 :223607-224234   | MVR | M36C05 | OK     | 39.4537 | 30.2438 | -0.383522   | 0.558685    | 0.57638  | 0.999883  |
| gene1840 | gene1840 | lukE        | gi 57650036 ref NC_002951.2 :1935655-1936591 | MVR | M36C05 | OK     | 1.47833 | 2.09779 | 0.504906    | -0.624551   | 0.53227  | 0.999883  |
| gene1841 | gene1841 | SACOL1882   | gi 57650036 ref NC_002951.2 :1937390-1937930 | MVR | M36C05 | OK     | 4.06628 | 6.49515 | 0.675651    | -0.874067   | 0.38208  | 0.999883  |
| gene1842 | gene1842 | SACOL1883   | gi 57650036 ref NC_002951.2 :1937942-1938731 | MVR | M36C05 | OK     | 21.4218 | 32.2145 | 0.588631    | -0.854503   | 0.39283  | 0.999883  |
| gene1843 | gene1843 | SACOL_tRNA- | gi 57650036 ref NC_002951.2 :1939973-1940062 | MVR | M36C05 | NOTEST | 0       | 0       | 0           | 0           | 1        | 1         |
| gene1844 | gene1844 | SACOL_tRNA- | gi 57650036 ref NC_002951.2 :1940116-1940188 | MVR | M36C05 | NOTEST | 0       | 0       | 0           | 0           | 1        | 1         |
| gene1845 | gene1845 | SACOL_tRNA- | gi 57650036 ref NC_002951.2 :1940189-1940264 | MVR | M36C05 | NOTEST | 0       | 0       | 0           | 0           | 1        | 1         |
| gene1846 | gene1846 | SACOL_tRNA- | gi 57650036 ref NC_002951.2 :1940278-1940352 | MVR | M36C05 | NOTEST | 0       | 0       | 0           | 0           | 1        | 1         |
| gene1847 | gene1847 | SACOL_tRNA- | gi 57650036 ref NC_002951.2 :1940367-1940443 | MVR | M36C05 | NOTEST | 0       | 0       | 0           | 0           | 1        | 1         |
| gene1849 | gene1849 | SACOL_tRNA- | gi 57650036 ref NC_002951.2 :1940545-1940621 | MVR | M36C05 | NOTEST | 0       | 0       | 0           | 0           | 1        | 1         |
| gene185  | gene185  | SACOL0191   | gi 57650036 ref NC_002951.2 :224442-225021   | MVR | M36C05 | OK     | 13.4985 | 32.3339 | 1.26025     | -1.83442    | 0.06659  | 0.515441  |
| gene1850 | gene1850 | SACOL_tRNA- | gi 57650036 ref NC_002951.2 :1940642-1940716 | MVR | M36C05 | NOTEST | 0       | 0       | 0           | 0           | 1        | 1         |
| gene1851 | gene1851 | SACOL1885   | gi 57650036 ref NC_002951.2 :1941187-1941742 | MVR | M36C05 | OK     | 9.00155 | 14.929  | 0.729868    | -1.0397     | 0.29848  | 0.980522  |
| gene1852 | gene1852 | SACOL1886   | gi 57650036 ref NC_002951.2 :1941835-1942063 | MVR | M36C05 | OK     | 35.684  | 21.7698 | -0.712947   | 0.885309    | 0.37599  | 0.999883  |
| gene1853 | gene1853 | hemG        | gi 57650036 ref NC_002951.2 :1942064-1943465 | MVR | M36C05 | OK     | 25.4909 | 22.0284 | -0.210614   | 0.2934      | 0.76922  | 0.999883  |
| gene1854 | gene1854 | hemH        | gi 57650036 ref NC_002951.2 :1943488-1944412 | MVR | M36C05 | OK     | 27.0659 | 26.2005 | -0.0468779  | 0.067454    | 0.94622  | 0.999883  |
| gene1855 | gene1855 | hemE        | gi 57650036 ref NC_002951.2 :1944469-1945607 | MVR | M36C05 | OK     | 16.308  | 21.9747 | 0.430264    | -0.624287   | 0.53244  | 0.999883  |
| gene1856 | gene1856 | SACOL1890   | gi 57650036 ref NC_002951.2 :1944469-1945607 | MVR | M36C05 | NOTEST | 0       | 0       | 0           | 0           | 1        | 1         |
| gene1857 | gene1857 | SACOL1891   | gi 57650036 ref NC_002951.2 :1945769-1946273 | MVR | M36C05 | OK     | 79.1857 | 161.637 | 1.02945     | -1.40678    | 0.15949  | 0.779659  |

|          |          |             |                                              |     |        |        |         |         |           |           |          |           |
|----------|----------|-------------|----------------------------------------------|-----|--------|--------|---------|---------|-----------|-----------|----------|-----------|
| gene1858 | gene1858 | SACOL1892   | gi 57650036 ref NC_002951.2 :1946396-1948353 | MVR | M36C05 | OK     | 65.091  | 60.6146 | -0.102792 | 0.096248  | 0.92332  | 0.999883  |
| gene1859 | gene1859 | SACOL1893   | gi 57650036 ref NC_002951.2 :1946396-1948353 | MVR | M36C05 | OK     | 72.4907 | 84.8381 | 0.226917  | -0.171532 | 0.86381  | 0.999883  |
| gene186  | gene186  | SACOL0192   | gi 57650036 ref NC_002951.2 :225403-226501   | MVR | M36C05 | OK     | 1.60586 | 2.57848 | 0.68317   | -0.893664 | 0.3715   | 0.999883  |
| gene1860 | gene1860 | SACOL1894   | gi 57650036 ref NC_002951.2 :1948486-1948909 | MVR | M36C05 | OK     | 64.8242 | 72.1283 | 0.154033  | -0.22429  | 0.82253  | 0.999883  |
| gene1861 | gene1861 | SACOL1895   | gi 57650036 ref NC_002951.2 :1949050-1949416 | MVR | M36C05 | OK     | 131.93  | 668.651 | 2.34148   | -3.0438   | 0.00234  | 0.0650238 |
| gene1862 | gene1862 | SACOL1896   | gi 57650036 ref NC_002951.2 :1950148-1950706 | MVR | M36C05 | OK     | 5.07277 | 5.24297 | 0.0476104 | -0.062457 | 0.9502   | 0.999883  |
| gene1863 | gene1863 | SACOL1897   | gi 57650036 ref NC_002951.2 :1950910-1951873 | MVR | M36C05 | OK     | 58.3186 | 50.8759 | -0.196973 | 0.263997  | 0.79178  | 0.999883  |
| gene1864 | gene1864 | cbf1        | gi 57650036 ref NC_002951.2 :1951993-1957054 | MVR | M36C05 | OK     | 151.484 | 81.1515 | -0.900479 | 0.43442   | 0.66398  | 0.999883  |
| gene1865 | gene1865 | SACOL1899   | gi 57650036 ref NC_002951.2 :1951993-1957054 | MVR | M36C05 | OK     | 91.9755 | 76.8147 | -0.259867 | 0.212509  | 0.83171  | 0.999883  |
| gene1866 | gene1866 | SACOL1900   | gi 57650036 ref NC_002951.2 :1951993-1957054 | MVR | M36C05 | OK     | 66.3558 | 73.8687 | 0.15474   | -0.068853 | 0.94511  | 0.999883  |
| gene1867 | gene1867 | SACOL1902   | gi 57650036 ref NC_002951.2 :1957825-1958170 | MVR | M36C05 | OK     | 640.597 | 242.339 | -1.40239  | 1.81701   | 0.06922  | 0.522414  |
| gene1868 | gene1868 | SACOL1903   | gi 57650036 ref NC_002951.2 :1958238-1959363 | MVR | M36C05 | OK     | 22.8471 | 19.0716 | -0.260586 | 0.374682  | 0.7079   | 0.999883  |
| gene1869 | gene1869 | SACOL1904   | gi 57650036 ref NC_002951.2 :1959541-1960006 | MVR | M36C05 | OK     | 73.9117 | 10.413  | -2.82742  | 3.99696   | 6.42E-05 | 0.0039687 |
| gene187  | gene187  | SACOL0193   | gi 57650036 ref NC_002951.2 :226513-227785   | MVR | M36C05 | OK     | 2.06477 | 2.15962 | 0.0647957 | -0.087682 | 0.93013  | 0.999883  |
| gene1870 | gene1870 | SACOL1905   | gi 57650036 ref NC_002951.2 :1960361-1960985 | MVR | M36C05 | OK     | 14.4675 | 8.85111 | -0.70889  | 1.02182   | 0.30687  | 0.991033  |
| gene1871 | gene1871 | SACOL1906   | gi 57650036 ref NC_002951.2 :1961006-1962119 | MVR | M36C05 | OK     | 13.2222 | 9.54047 | -0.470835 | 0.691264  | 0.4894   | 0.999883  |
| gene1872 | gene1872 | SACOL1907   | gi 57650036 ref NC_002951.2 :1962281-1963103 | MVR | M36C05 | OK     | 78.8097 | 32.6311 | -1.27212  | 1.74738   | 0.08057  | 0.565013  |
| gene1873 | gene1873 | fumC        | gi 57650036 ref NC_002951.2 :1963565-1964951 | MVR | M36C05 | OK     | 196.744 | 104.1   | -0.918345 | 1.05      | 0.29372  | 0.976946  |
| gene1874 | gene1874 | SACOL1909   | gi 57650036 ref NC_002951.2 :1965146-1965542 | MVR | M36C05 | OK     | 41.641  | 8.40315 | -2.309    | 3.17432   | 0.0015   | 0.0464484 |
| gene1875 | gene1875 | SACOL1910   | gi 57650036 ref NC_002951.2 :1965660-1966023 | MVR | M36C05 | OK     | 0.80456 | 2.66989 | 1.7305    | -1.13616  | 0.25589  | 0.933877  |
| gene1876 | gene1876 | SACOL1911   | gi 57650036 ref NC_002951.2 :1966318-1966471 | MVR | M36C05 | OK     | 698.883 | 2787.74 | 1.99597   | -2.87035  | 0.0041   | 0.0948257 |
| gene1877 | gene1877 | SACOL1912   | gi 57650036 ref NC_002951.2 :1966495-1967095 | MVR | M36C05 | OK     | 105.859 | 692.978 | 2.71066   | -3.23992  | 0.0012   | 0.0391064 |
| gene1878 | gene1878 | SACOL1913   | gi 57650036 ref NC_002951.2 :1967253-1967724 | MVR | M36C05 | OK     | 21.9284 | 15.8864 | -0.465005 | 0.672691  | 0.50114  | 0.999883  |
| gene1879 | gene1879 | SACOL1914   | gi 57650036 ref NC_002951.2 :1967728-1968856 | MVR | M36C05 | OK     | 33.8335 | 23.4059 | -0.53158  | 0.745947  | 0.4557   | 0.999883  |
| gene188  | gene188  | SACOL0194   | gi 57650036 ref NC_002951.2 :227787-229056   | MVR | M36C05 | OK     | 2.91017 | 3.50635 | 0.268866  | -0.37956  | 0.70427  | 0.999883  |
| gene1880 | gene1880 | SACOL1915   | gi 57650036 ref NC_002951.2 :1969006-1971179 | MVR | M36C05 | OK     | 26.3969 | 14.1829 | -0.896219 | 0.786827  | 0.43138  | 0.999883  |
| gene1881 | gene1881 | SACOL1916   | gi 57650036 ref NC_002951.2 :1969006-1971179 | MVR | M36C05 | OK     | 17.394  | 8.76235 | -0.9892   | 1.07872   | 0.28071  | 0.965951  |
| gene1882 | gene1882 | SACOL1917   | gi 57650036 ref NC_002951.2 :1971436-1972498 | MVR | M36C05 | OK     | 49.4772 | 29.0373 | -0.768856 | 1.05512   | 0.29137  | 0.975616  |
| gene1883 | gene1883 | SACOL1918   | gi 57650036 ref NC_002951.2 :1972990-1974310 | MVR | M36C05 | OK     | 1.01386 | 0.49214 | -1.04272  | 1.15405   | 0.24848  | 0.922459  |
| gene1884 | gene1884 | SACOL_tRNA- | gi 57650036 ref NC_002951.2 :1974496-1974580 | MVR | M36C05 | NOTEST | 0       | 0       | 0         | 0         | 1        | 1         |
| gene1885 | gene1885 | SACOL_tRNA- | gi 57650036 ref NC_002951.2 :1974796-1974871 | MVR | M36C05 | NOTEST | 0       | 0       | 0         | 0         | 1        | 1         |
| gene1886 | gene1886 | SACOL_tRNA- | gi 57650036 ref NC_002951.2 :1974878-1974952 | MVR | M36C05 | NOTEST | 0       | 0       | 0         | 0         | 1        | 1         |
| gene1887 | gene1887 | SACOL_tRNA- | gi 57650036 ref NC_002951.2 :1974957-1975029 | MVR | M36C05 | NOTEST | 0       | 0       | 0         | 0         | 1        | 1         |

|          |          |                                                         |     |        |        |         |         |             |             |         |          |
|----------|----------|---------------------------------------------------------|-----|--------|--------|---------|---------|-------------|-------------|---------|----------|
| gene1888 | gene1888 | SACOL_tRNA-gi 57650036 ref NC_002951.2 :1975040-1975113 | MVR | M36C05 | NOTEST | 0       | 0       | 0           | 0           | 1       | 1        |
| gene1889 | gene1889 | SACOL_tRNA-gi 57650036 ref NC_002951.2 :1975115-1975189 | MVR | M36C05 | NOTEST | 0       | 0       | 0           | 0           | 1       | 1        |
| gene189  | gene189  | SACOL0195 gi 57650036 ref NC_002951.2 :229057-229897    | MVR | M36C05 | OK     | 2.65784 | 3.27463 | 0.301075    | -0.396797   | 0.69152 | 0.999883 |
| gene1890 | gene1890 | SACOL_tRNA-gi 57650036 ref NC_002951.2 :1975204-1975285 | MVR | M36C05 | NOTEST | 0       | 0       | 0           | 0           | 1       | 1        |
| gene1891 | gene1891 | SACOL_tRNA-gi 57650036 ref NC_002951.2 :1975290-1975366 | MVR | M36C05 | NOTEST | 0       | 0       | 0           | 0           | 1       | 1        |
| gene1892 | gene1892 | SACOL_tRNA-gi 57650036 ref NC_002951.2 :1975373-1975446 | MVR | M36C05 | NOTEST | 0       | 0       | 0           | 0           | 1       | 1        |
| gene1893 | gene1893 | SACOL_tRNA-gi 57650036 ref NC_002951.2 :1975464-1975540 | MVR | M36C05 | NOTEST | 0       | 0       | 0           | 0           | 1       | 1        |
| gene1894 | gene1894 | SACOL_tRNA-gi 57650036 ref NC_002951.2 :1975549-1975623 | MVR | M36C05 | NOTEST | 0       | 0       | 0           | 0           | 1       | 1        |
| gene1896 | gene1896 | SACOL_tRNA-gi 57650036 ref NC_002951.2 :1975768-1975844 | MVR | M36C05 | OK     | 0       | 293622  | 1.79769e+30 | 1.79769e+30 | 0.14732 | 0.743774 |
| gene1898 | gene1898 | SACOL_tRNA-gi 57650036 ref NC_002951.2 :1975953-1976027 | MVR | M36C05 | NOTEST | 0       | 0       | 0           | 0           | 1       | 1        |
| gene19   | gene19   | SACOL_tRNA-gi 57650036 ref NC_002951.2 :24259-24332     | MVR | M36C05 | NOTEST | 0       | 0       | 0           | 0           | 1       | 1        |
| gene190  | gene190  | SACOL0196 gi 57650036 ref NC_002951.2 :229970-231047    | MVR | M36C05 | OK     | 2.46808 | 2.2631  | -0.125089   | 0.167298    | 0.86714 | 0.999883 |
| gene1905 | gene1905 | SACOL_tRNA-gi 57650036 ref NC_002951.2 :1976595-1976677 | MVR | M36C05 | NOTEST | 0       | 0       | 0           | 0           | 1       | 1        |
| gene1906 | gene1906 | SACOL_tRNA-gi 57650036 ref NC_002951.2 :1976680-1976756 | MVR | M36C05 | NOTEST | 0       | 0       | 0           | 0           | 1       | 1        |
| gene1907 | gene1907 | SACOL_tRNA-gi 57650036 ref NC_002951.2 :1976761-1976837 | MVR | M36C05 | NOTEST | 0       | 0       | 0           | 0           | 1       | 1        |
| gene1908 | gene1908 | SACOL_tRNA-gi 57650036 ref NC_002951.2 :1976853-1976929 | MVR | M36C05 | NOTEST | 0       | 0       | 0           | 0           | 1       | 1        |
| gene1909 | gene1909 | rrfD gi 57650036 ref NC_002951.2 :1976940-1977055       | MVR | M36C05 | OK     | 776204  | 214973  | -1.85228    | 2.14        | 0.03235 | 0.344846 |
| gene191  | gene191  | SACOL0197 gi 57650036 ref NC_002951.2 :231071-232112    | MVR | M36C05 | OK     | 2.43364 | 2.75342 | 0.178107    | -0.239656   | 0.8106  | 0.999883 |
| gene1910 | gene1910 | rrlD gi 57650036 ref NC_002951.2 :1977127-1980050       | MVR | M36C05 | HIDATA | 0       | 38501   | 0           | 0           | 1       | 1        |
| gene1913 | gene1913 | rrsD gi 57650036 ref NC_002951.2 :1980523-1982078       | MVR | M36C05 | OK     | 10090.9 | 12425.8 | 0.300283    | -0.416635   | 0.67695 | 0.999883 |
| gene1914 | gene1914 | SACOL1919 gi 57650036 ref NC_002951.2 :1982817-1983264  | MVR | M36C05 | OK     | 805.323 | 1002.26 | 0.315622    | -0.352291   | 0.72462 | 0.999883 |
| gene1915 | gene1915 | SACOL1920 gi 57650036 ref NC_002951.2 :1983360-1984311  | MVR | M36C05 | OK     | 38.1263 | 87.0796 | 1.19155     | -1.58706    | 0.1125  | 0.665508 |
| gene1916 | gene1916 | bcp gi 57650036 ref NC_002951.2 :1984316-1984772        | MVR | M36C05 | OK     | 77.7159 | 178.031 | 1.19585     | -1.65072    | 0.0988  | 0.634415 |
| gene1917 | gene1917 | hemL2 gi 57650036 ref NC_002951.2 :1984852-1986142      | MVR | M36C05 | OK     | 88.4933 | 65.8418 | -0.426565   | 0.529624    | 0.59637 | 0.999883 |
| gene1918 | gene1918 | SACOL1923 gi 57650036 ref NC_002951.2 :1986434-1987529  | MVR | M36C05 | OK     | 40.0162 | 31.4151 | -0.349126   | 0.481112    | 0.63044 | 0.999883 |
| gene1919 | gene1919 | SACOL1924 gi 57650036 ref NC_002951.2 :1987719-1989456  | MVR | M36C05 | OK     | 20.2949 | 11.1149 | -0.868623   | 1.22715     | 0.21977 | 0.89416  |
| gene192  | gene192  | SACOL0198 gi 57650036 ref NC_002951.2 :232166-233135    | MVR | M36C05 | OK     | 2.90423 | 3.29831 | 0.183573    | -0.249715   | 0.80281 | 0.999883 |
| gene1920 | gene1920 | SACOL1925 gi 57650036 ref NC_002951.2 :1989746-1990289  | MVR | M36C05 | OK     | 58.41   | 24.1436 | -1.27458    | 1.85454     | 0.06366 | 0.504626 |
| gene1921 | gene1921 | mutY gi 57650036 ref NC_002951.2 :1990590-1991628       | MVR | M36C05 | OK     | 8.18991 | 9.07936 | 0.148743    | -0.218258   | 0.82723 | 0.999883 |
| gene1922 | gene1922 | SACOL1927 gi 57650036 ref NC_002951.2 :1991779-1992757  | MVR | M36C05 | OK     | 126.571 | 171.51  | 0.438343    | -0.52403    | 0.60026 | 0.999883 |
| gene1923 | gene1923 | SACOL1928 gi 57650036 ref NC_002951.2 :1993017-1993854  | MVR | M36C05 | OK     | 32.7178 | 20.4331 | -0.679171   | 0.983231    | 0.32549 | 0.999883 |
| gene1924 | gene1924 | SACOL1929 gi 57650036 ref NC_002951.2 :1993862-1995380  | MVR | M36C05 | OK     | 20.0227 | 21.0753 | 0.0739143   | -0.10347    | 0.91759 | 0.999883 |
| gene1925 | gene1925 | SACOL1930 gi 57650036 ref NC_002951.2 :1995394-1996505  | MVR | M36C05 | OK     | 31.2126 | 39.1189 | 0.325738    | -0.245007   | 0.80645 | 0.999883 |

|          |          |           |                                              |     |        |        |         |         |           |           |          |           |
|----------|----------|-----------|----------------------------------------------|-----|--------|--------|---------|---------|-----------|-----------|----------|-----------|
| gene1926 | gene1926 | recX      | gi 57650036 ref NC_002951.2 :1995394-1996505 | MVR | M36C05 | OK     | 12.8736 | 23.7011 | 0.880542  | -1.09049  | 0.2755   | 0.961224  |
| gene1927 | gene1927 | SACOL1932 | gi 57650036 ref NC_002951.2 :1996765-1997575 | MVR | M36C05 | OK     | 70.6443 | 51.1768 | -0.465083 | 0.631719  | 0.52757  | 0.999883  |
| gene1928 | gene1928 | SACOL1933 | gi 57650036 ref NC_002951.2 :1997915-1998431 | MVR | M36C05 | OK     | 58.1717 | 524.156 | 3.17161   | -4.02727  | 5.64E-05 | 0.0035511 |
| gene1929 | gene1929 | SACOL1934 | gi 57650036 ref NC_002951.2 :1998561-1998723 | MVR | M36C05 | OK     | 12.8485 | 21.1514 | 0.719157  | -0.435107 | 0.66349  | 0.999883  |
| gene193  | gene193  | SACOL0199 | gi 57650036 ref NC_002951.2 :233495-234068   | MVR | M36C05 | OK     | 3.85102 | 1.77594 | -1.11666  | 1.28897   | 0.19741  | 0.861278  |
| gene1930 | gene1930 | SACOL1935 | gi 57650036 ref NC_002951.2 :1998946-2000098 | MVR | M36C05 | OK     | 13.2969 | 9.95997 | -0.416879 | 0.611626  | 0.54079  | 0.999883  |
| gene1931 | gene1931 | SACOL1936 | gi 57650036 ref NC_002951.2 :2000357-2000888 | MVR | M36C05 | OK     | 89.0195 | 110.086 | 0.306443  | -0.42185  | 0.67313  | 0.999883  |
| gene1932 | gene1932 | pepS      | gi 57650036 ref NC_002951.2 :2000977-2002234 | MVR | M36C05 | OK     | 40.9324 | 51.4197 | 0.329077  | -0.433968 | 0.66431  | 0.999883  |
| gene1933 | gene1933 | SACOL1938 | gi 57650036 ref NC_002951.2 :2002236-2002443 | MVR | M36C05 | OK     | 17.584  | 21.6624 | 0.300932  | -0.319515 | 0.74934  | 0.999883  |
| gene1934 | gene1934 | SACOL1939 | gi 57650036 ref NC_002951.2 :2002583-2003048 | MVR | M36C05 | OK     | 42.5113 | 812.631 | 4.25668   | -5.34474  | 9.05E-08 | 1.56E-05  |
| gene1935 | gene1935 | SACOL1940 | gi 57650036 ref NC_002951.2 :2003054-2003330 | MVR | M36C05 | OK     | 256.905 | 1030.1  | 2.00348   | -2.64441  | 0.00818  | 0.14732   |
| gene1936 | gene1936 | SACOL1941 | gi 57650036 ref NC_002951.2 :2003607-2004825 | MVR | M36C05 | OK     | 11.7082 | 90.7543 | 2.95444   | -3.92747  | 8.58E-05 | 0.0050509 |
| gene1937 | gene1937 | vraR      | gi 57650036 ref NC_002951.2 :2004940-2007301 | MVR | M36C05 | OK     | 28.2201 | 24.1286 | -0.225981 | 0.167695  | 0.86682  | 0.999883  |
| gene1938 | gene1938 | vraS      | gi 57650036 ref NC_002951.2 :2004940-2007301 | MVR | M36C05 | OK     | 18.8274 | 20.1199 | 0.0957889 | -0.086855 | 0.93079  | 0.999883  |
| gene1939 | gene1939 | SACOL1944 | gi 57650036 ref NC_002951.2 :2004940-2007301 | MVR | M36C05 | OK     | 16.5121 | 20.8818 | 0.338727  | -0.229692 | 0.81833  | 0.999883  |
| gene194  | gene194  | uhpT      | gi 57650036 ref NC_002951.2 :234222-235602   | MVR | M36C05 | OK     | 9.05602 | 10.7433 | 0.246485  | -0.361329 | 0.71785  | 0.999883  |
| gene1940 | gene1940 | SACOL1945 | gi 57650036 ref NC_002951.2 :2007315-2007702 | MVR | M36C05 | OK     | 9.095   | 6.44724 | -0.496392 | 0.622451  | 0.53365  | 0.999883  |
| gene1941 | gene1941 | SACOL1946 | gi 57650036 ref NC_002951.2 :2007918-2008677 | MVR | M36C05 | OK     | 97.5933 | 105.983 | 0.118975  | -0.154564 | 0.87717  | 0.999883  |
| gene1942 | gene1942 | SACOL1947 | gi 57650036 ref NC_002951.2 :2009204-2010191 | MVR | M36C05 | OK     | 9.0437  | 7.00607 | -0.368309 | 0.53828   | 0.59038  | 0.999883  |
| gene1943 | gene1943 | SACOL1948 | gi 57650036 ref NC_002951.2 :2010621-2011035 | MVR | M36C05 | OK     | 3.64439 | 5.14369 | 0.497127  | -0.569122 | 0.56927  | 0.999883  |
| gene1944 | gene1944 | SACOL1949 | gi 57650036 ref NC_002951.2 :2011063-2011174 | MVR | M36C05 | NOTEST | 0       | 0       | 0         | 0         | 1        | 1         |
| gene1945 | gene1945 | SACOL1950 | gi 57650036 ref NC_002951.2 :2011259-2011991 | MVR | M36C05 | OK     | 69.4007 | 17.0063 | -2.02889  | 2.86631   | 0.00415  | 0.0949445 |
| gene1946 | gene1946 | SACOL1951 | gi 57650036 ref NC_002951.2 :2011992-2013306 | MVR | M36C05 | OK     | 47.8065 | 21.9689 | -1.12175  | 1.52225   | 0.12795  | 0.7083    |
| gene1947 | gene1947 | SACOL1952 | gi 57650036 ref NC_002951.2 :2013597-2014098 | MVR | M36C05 | OK     | 187.026 | 488.641 | 1.38553   | -1.70078  | 0.08899  | 0.597944  |
| gene1948 | gene1948 | SACOL1953 | gi 57650036 ref NC_002951.2 :2014179-2014272 | MVR | M36C05 | NOTEST | 0       | 0       | 0         | 0         | 1        | 1         |
| gene1949 | gene1949 | SACOL1954 | gi 57650036 ref NC_002951.2 :2014486-2015041 | MVR | M36C05 | OK     | 57.8923 | 45.7199 | -0.340548 | 0.49174   | 0.6229   | 0.999883  |
| gene195  | gene195  | SACOL0201 | gi 57650036 ref NC_002951.2 :235960-239233   | MVR | M36C05 | OK     | 7.5408  | 3.94722 | -0.933883 | 0.654737  | 0.51264  | 0.999883  |
| gene1950 | gene1950 | dinP      | gi 57650036 ref NC_002951.2 :2015108-2016179 | MVR | M36C05 | OK     | 22.0938 | 33.6741 | 0.607998  | -0.85919  | 0.39024  | 0.999883  |
| gene1951 | gene1951 | SACOL1956 | gi 57650036 ref NC_002951.2 :2016425-2016956 | MVR | M36C05 | OK     | 65.2429 | 179.808 | 1.46256   | -1.98369  | 0.04729  | 0.426221  |
| gene1952 | gene1952 | SACOL1957 | gi 57650036 ref NC_002951.2 :2017125-2018487 | MVR | M36C05 | OK     | 11.2549 | 9.86627 | -0.189979 | 0.278234  | 0.78083  | 0.999883  |
| gene1953 | gene1953 | SACOL1958 | gi 57650036 ref NC_002951.2 :2018567-2019515 | MVR | M36C05 | OK     | 39.5766 | 40.6922 | 0.0401063 | -0.055616 | 0.95565  | 0.999883  |
| gene1954 | gene1954 | gatB      | gi 57650036 ref NC_002951.2 :2020283-2021711 | MVR | M36C05 | OK     | 112.259 | 36.9834 | -1.60187  | 1.98807   | 0.0468   | 0.424995  |
| gene1955 | gene1955 | gatA      | gi 57650036 ref NC_002951.2 :2021723-2023181 | MVR | M36C05 | OK     | 61.5188 | 20.8544 | -1.56068  | 2.06366   | 0.03905  | 0.38357   |

|          |          |           |                                              |     |        |        |         |         |            |           |         |          |
|----------|----------|-----------|----------------------------------------------|-----|--------|--------|---------|---------|------------|-----------|---------|----------|
| gene1956 | gene1956 | gatC      | gi 57650036 ref NC_002951.2 :2023182-2023485 | MVR | M36C05 | OK     | 84.481  | 34.8385 | -1.27795   | 1.85079   | 0.0642  | 0.507769 |
| gene1957 | gene1957 | SACOL1963 | gi 57650036 ref NC_002951.2 :2023852-2025391 | MVR | M36C05 | OK     | 124.445 | 116.482 | -0.0953967 | 0.109632  | 0.9127  | 0.999883 |
| gene1958 | gene1958 | camS      | gi 57650036 ref NC_002951.2 :2025479-2026679 | MVR | M36C05 | OK     | 90.9588 | 61.4091 | -0.56676   | 0.712506  | 0.47615 | 0.999883 |
| gene1959 | gene1959 | ligA      | gi 57650036 ref NC_002951.2 :2026691-2028695 | MVR | M36C05 | OK     | 42.4213 | 24.253  | -0.806627  | 1.04159   | 0.2976  | 0.979427 |
| gene196  | gene196  | SACOL0202 | gi 57650036 ref NC_002951.2 :235960-239233   | MVR | M36C05 | OK     | 5.13347 | 3.89889 | -0.396872  | 0.39807   | 0.69058 | 0.999883 |
| gene1960 | gene1960 | pcrA      | gi 57650036 ref NC_002951.2 :2028698-2031580 | MVR | M36C05 | OK     | 32.2009 | 11.2801 | -1.51332   | 1.81898   | 0.06891 | 0.522414 |
| gene1961 | gene1961 | SACOL1967 | gi 57650036 ref NC_002951.2 :2028698-2031580 | MVR | M36C05 | OK     | 19.4465 | 12.982  | -0.582994  | 0.304349  | 0.76086 | 0.999883 |
| gene1962 | gene1962 | SACOL1968 | gi 57650036 ref NC_002951.2 :2031751-2032054 | MVR | M36C05 | OK     | 220.385 | 100.534 | -1.13235   | 1.63947   | 0.10112 | 0.639058 |
| gene1963 | gene1963 | purB      | gi 57650036 ref NC_002951.2 :2032162-2033458 | MVR | M36C05 | OK     | 82.1061 | 37.6189 | -1.12603   | 1.44382   | 0.14879 | 0.749852 |
| gene1964 | gene1964 | sspB2     | gi 57650036 ref NC_002951.2 :2034318-2035485 | MVR | M36C05 | OK     | 1.61243 | 1.59622 | -0.0145773 | 0.01868   | 0.9851  | 0.999883 |
| gene1965 | gene1965 | SACOL1971 | gi 57650036 ref NC_002951.2 :2035515-2035842 | MVR | M36C05 | OK     | 6.63535 | 2.50842 | -1.40339   | 1.3767    | 0.1686  | 0.808072 |
| gene1966 | gene1966 | SACOL1972 | gi 57650036 ref NC_002951.2 :2036133-2036890 | MVR | M36C05 | OK     | 85.9305 | 41.6288 | -1.04559   | 0.338611  | 0.7349  | 0.999883 |
| gene1967 | gene1967 | SACOL1973 | gi 57650036 ref NC_002951.2 :2036133-2036890 | MVR | M36C05 | OK     | 48.1163 | 36.4312 | -0.401352  | 0.5647    | 0.57228 | 0.999883 |
| gene1968 | gene1968 | nadE      | gi 57650036 ref NC_002951.2 :2037160-2039444 | MVR | M36C05 | OK     | 50.6494 | 48.7694 | -0.0545698 | 0.038537  | 0.96926 | 0.999883 |
| gene1969 | gene1969 | SACOL1975 | gi 57650036 ref NC_002951.2 :2037160-2039444 | MVR | M36C05 | OK     | 48.1591 | 48.9524 | 0.0235693  | -0.023631 | 0.98115 | 0.999883 |
| gene197  | gene197  | SACOL0203 | gi 57650036 ref NC_002951.2 :235960-239233   | MVR | M36C05 | OK     | 4.86654 | 4.87576 | 0.002731   | -0.002132 | 0.9983  | 0.999883 |
| gene1970 | gene1970 | SACOL1976 | gi 57650036 ref NC_002951.2 :2039627-2040704 | MVR | M36C05 | OK     | 27.8344 | 18.7334 | -0.571257  | 0.818088  | 0.41331 | 0.999883 |
| gene1971 | gene1971 | pheA      | gi 57650036 ref NC_002951.2 :2040723-2041518 | MVR | M36C05 | OK     | 29.696  | 25.4001 | -0.225434  | 0.32704   | 0.74364 | 0.999883 |
| gene1972 | gene1972 | SACOL1978 | gi 57650036 ref NC_002951.2 :2041542-2041665 | MVR | M36C05 | NOTEST | 0       | 0       | 0          | 0         | 1       | 1        |
| gene1973 | gene1973 | SACOL1979 | gi 57650036 ref NC_002951.2 :2041707-2043270 | MVR | M36C05 | OK     | 90.5471 | 69.6283 | -0.378996  | 0.455828  | 0.64851 | 0.999883 |
| gene1974 | gene1974 | SACOL1980 | gi 57650036 ref NC_002951.2 :2043474-2044572 | MVR | M36C05 | OK     | 6.75801 | 17.3126 | 1.35716    | -1.97663  | 0.04808 | 0.430141 |
| gene1975 | gene1975 | SACOL1981 | gi 57650036 ref NC_002951.2 :2044943-2045504 | MVR | M36C05 | OK     | 54.4392 | 72.1791 | 0.406936   | -0.578819 | 0.56271 | 0.999883 |
| gene1976 | gene1976 | ppaC      | gi 57650036 ref NC_002951.2 :2045556-2046486 | MVR | M36C05 | OK     | 199.033 | 208.635 | 0.0679716  | -0.078871 | 0.93714 | 0.999883 |
| gene1977 | gene1977 | SACOL1983 | gi 57650036 ref NC_002951.2 :2046680-2046854 | MVR | M36C05 | NOTEST | 0       | 0       | 0          | 0         | 1       | 1        |
| gene1978 | gene1978 | aldA2     | gi 57650036 ref NC_002951.2 :2046905-2048285 | MVR | M36C05 | OK     | 108.571 | 354.528 | 1.70726    | -1.89194  | 0.0585  | 0.484391 |
| gene1979 | gene1979 | SACOL1985 | gi 57650036 ref NC_002951.2 :2048404-2049433 | MVR | M36C05 | OK     | 23.682  | 45.8901 | 0.954392   | -1.32891  | 0.18388 | 0.83431  |
| gene198  | gene198  | pflB      | gi 57650036 ref NC_002951.2 :239820-242070   | MVR | M36C05 | OK     | 17.1776 | 77.7859 | 2.17898    | -2.70793  | 0.00677 | 0.13101  |
| gene1980 | gene1980 | SACOL1986 | gi 57650036 ref NC_002951.2 :2049702-2050104 | MVR | M36C05 | OK     | 16.7841 | 42.9841 | 1.35671    | -1.9451   | 0.05176 | 0.447556 |
| gene1981 | gene1981 | SACOL1987 | gi 57650036 ref NC_002951.2 :2050676-2050850 | MVR | M36C05 | OK     | 1039.76 | 1463.95 | 0.493614   | -0.709609 | 0.47795 | 0.999883 |
| gene1982 | gene1982 | SACOL1988 | gi 57650036 ref NC_002951.2 :2051300-2052341 | MVR | M36C05 | OK     | 13.4566 | 17.5694 | 0.384753   | -0.56237  | 0.57386 | 0.999883 |
| gene1983 | gene1983 | SACOL1989 | gi 57650036 ref NC_002951.2 :2052397-2053794 | MVR | M36C05 | OK     | 32.6842 | 31.2209 | -0.0660808 | 0.071837  | 0.94273 | 0.999883 |
| gene1984 | gene1984 | SACOL1990 | gi 57650036 ref NC_002951.2 :2052397-2053794 | MVR | M36C05 | OK     | 31.1363 | 38.2429 | 0.296591   | -0.247936 | 0.80418 | 0.999883 |
| gene1985 | gene1985 | SACOL1991 | gi 57650036 ref NC_002951.2 :2053853-2054378 | MVR | M36C05 | OK     | 44.0324 | 35.3348 | -0.317477  | 0.464714  | 0.64214 | 0.999883 |

|          |          |           |                                              |     |        |        |         |         |              |              |          |           |
|----------|----------|-----------|----------------------------------------------|-----|--------|--------|---------|---------|--------------|--------------|----------|-----------|
| gene1986 | gene1986 | SACOL1992 | gi 57650036 ref NC_002951.2 :2054498-2055062 | MVR | M36C05 | OK     | 78.0199 | 154.996 | 0.990318     | -1.33341     | 0.1824   | 0.830192  |
| gene1987 | gene1987 | SACOL1993 | gi 57650036 ref NC_002951.2 :2055127-2057417 | MVR | M36C05 | OK     | 17.8682 | 39.36   | 1.13933      | -0.944919    | 0.3447   | 0.999883  |
| gene1988 | gene1988 | SACOL1994 | gi 57650036 ref NC_002951.2 :2055127-2057417 | MVR | M36C05 | OK     | 19.3711 | 36.219  | 0.902838     | -0.833381    | 0.40463  | 0.999883  |
| gene1989 | gene1989 | SACOL1995 | gi 57650036 ref NC_002951.2 :2055127-2057417 | MVR | M36C05 | OK     | 7.80362 | 19.0421 | 1.28698      | -0.681611    | 0.49549  | 0.999883  |
| gene199  | gene199  | pflA      | gi 57650036 ref NC_002951.2 :242092-242848   | MVR | M36C05 | OK     | 13.9577 | 43.654  | 1.64506      | -2.369       | 0.01784  | 0.242627  |
| gene1990 | gene1990 | SACOL1996 | gi 57650036 ref NC_002951.2 :2057417-2058691 | MVR | M36C05 | OK     | 14.8576 | 31.4891 | 1.08365      | -1.21855     | 0.22302  | 0.89446   |
| gene1991 | gene1991 | SACOL1997 | gi 57650036 ref NC_002951.2 :2057417-2058691 | MVR | M36C05 | OK     | 23.8764 | 84.6526 | 1.82597      | -1.48817     | 0.13671  | 0.732537  |
| gene1992 | gene1992 | SACOL1998 | gi 57650036 ref NC_002951.2 :2058954-2059131 | MVR | M36C05 | OK     | 0       | 31.7031 | 1.79769e+30  | 1.79769e+30  | 0.01809  | 0.243354  |
| gene1993 | gene1993 | SACOL1999 | gi 57650036 ref NC_002951.2 :2059373-2059472 | MVR | M36C05 | NOTEST | 0       | 0       | 0            | 0            | 1        | 1         |
| gene1994 | gene1994 | SACOL2000 | gi 57650036 ref NC_002951.2 :2059671-2060958 | MVR | M36C05 | OK     | 111.355 | 99.1876 | -0.166937    | 0.199553     | 0.84183  | 0.999883  |
| gene1995 | gene1995 | map       | gi 57650036 ref NC_002951.2 :2061281-2063337 | MVR | M36C05 | OK     | 7.94976 | 8.90674 | 0.163987     | -0.238202    | 0.81173  | 0.999883  |
| gene1996 | gene1996 | h1b       | gi 57650036 ref NC_002951.2 :2063725-2064718 | MVR | M36C05 | OK     | 10.7982 | 26.5605 | 1.29849      | -1.88193     | 0.05985  | 0.491837  |
| gene1997 | gene1997 | SACOL2004 | gi 57650036 ref NC_002951.2 :2064955-2065828 | MVR | M36C05 | OK     | 1.98216 | 2.13053 | 0.104137     | -0.130695    | 0.89602  | 0.999883  |
| gene1998 | gene1998 | SACOL2006 | gi 57650036 ref NC_002951.2 :2065993-2067049 | MVR | M36C05 | OK     | 1.96805 | 1.28815 | -0.611466    | 0.763536     | 0.44514  | 0.999883  |
| gene1999 | gene1999 | SACOL2007 | gi 57650036 ref NC_002951.2 :2067483-2068708 | MVR | M36C05 | OK     | 5.84241 | 163.166 | 4.80364      | -6.1158      | 9.61E-10 | 3.48E-07  |
| gene2    | gene2    | SACOL0003 | gi 57650036 ref NC_002951.2 :3696-5051       | MVR | M36C05 | OK     | 334.631 | 421.879 | 0.334258     | -0.129583    | 0.8969   | 0.999883  |
| gene20   | gene20   | yycF      | gi 57650036 ref NC_002951.2 :24951-25653     | MVR | M36C05 | OK     | 103.598 | 162.219 | 0.646946     | -0.826695    | 0.40841  | 0.999883  |
| gene200  | gene200  | SACOL0206 | gi 57650036 ref NC_002951.2 :242951-243146   | MVR | M36C05 | OK     | 2.50546 | 0       | -1.79769e+30 | -1.79769e+30 | 0.22252  | 0.89416   |
| gene2000 | gene2000 | SACOL2009 | gi 57650036 ref NC_002951.2 :2069079-2069925 | MVR | M36C05 | OK     | 1.88015 | 3.75641 | 0.998504     | -1.28566     | 0.19856  | 0.864099  |
| gene2001 | gene2001 | SACOL2010 | gi 57650036 ref NC_002951.2 :2069986-2070898 | MVR | M36C05 | OK     | 1.44488 | 0.4647  | -1.63659     | 1.64204      | 0.10058  | 0.638047  |
| gene2002 | gene2002 | SACOL2011 | gi 57650036 ref NC_002951.2 :2071058-2072366 | MVR | M36C05 | OK     | 6.47421 | 9.94951 | 0.61992      | -0.909706    | 0.36298  | 0.999883  |
| gene2003 | gene2003 | SACOL2012 | gi 57650036 ref NC_002951.2 :2073218-2073662 | MVR | M36C05 | OK     | 12.4072 | 9.94572 | -0.319028    | 0.438929     | 0.66071  | 0.999883  |
| gene2004 | gene2004 | SACOL2013 | gi 57650036 ref NC_002951.2 :2073767-2074205 | MVR | M36C05 | OK     | 4.33817 | 10.6569 | 1.29663      | -1.62997     | 0.10311  | 0.644382  |
| gene2005 | gene2005 | SACOL2014 | gi 57650036 ref NC_002951.2 :2074522-2075113 | MVR | M36C05 | OK     | 4.45898 | 1.12936 | -1.9812      | 2.16994      | 0.03001  | 0.330484  |
| gene2006 | gene2006 | SACOL2015 | gi 57650036 ref NC_002951.2 :2075454-2075929 | MVR | M36C05 | OK     | 0.9284  | 1.20434 | 0.375416     | -0.303769    | 0.7613   | 0.999883  |
| gene2007 | gene2007 | groEL     | gi 57650036 ref NC_002951.2 :2076023-2077640 | MVR | M36C05 | OK     | 61.2161 | 127.257 | 1.05576      | -1.24828     | 0.21193  | 0.891421  |
| gene2008 | gene2008 | groES     | gi 57650036 ref NC_002951.2 :2077715-2078000 | MVR | M36C05 | OK     | 16.4148 | 25.3711 | 0.628184     | -0.820538    | 0.41191  | 0.999883  |
| gene2009 | gene2009 | SACOL2018 | gi 57650036 ref NC_002951.2 :2078174-2078918 | MVR | M36C05 | OK     | 29.2338 | 23.5261 | -0.313377    | 0.456988     | 0.64768  | 0.999883  |
| gene201  | gene201  | SACOL0207 | gi 57650036 ref NC_002951.2 :243183-244947   | MVR | M36C05 | OK     | 4.44358 | 2.95975 | -0.586244    | 0.853076     | 0.39362  | 0.999883  |
| gene2010 | gene2010 | SACOL2019 | gi 57650036 ref NC_002951.2 :2078942-2080202 | MVR | M36C05 | OK     | 85.5794 | 230.265 | 1.42796      | -1.65672     | 0.09758  | 0.629513  |
| gene2011 | gene2011 | SACOL2020 | gi 57650036 ref NC_002951.2 :2080398-2081025 | MVR | M36C05 | OK     | 92.9774 | 93.8334 | 0.0132212    | -0.017821    | 0.98578  | 0.999883  |
| gene2012 | gene2012 | SACOL2021 | gi 57650036 ref NC_002951.2 :2081385-2082171 | MVR | M36C05 | OK     | 46.8176 | 58.7352 | 0.327175     | -0.452593    | 0.65084  | 0.999883  |
| gene2013 | gene2013 | h1d       | gi 57650036 ref NC_002951.2 :2082767-2082902 | MVR | M36C05 | OK     | 100.672 | 1288.34 | 3.67778      | -3.43907     | 0.00058  | 0.0229583 |

|          |          |             |                                              |     |        |        |         |         |              |              |         |           |
|----------|----------|-------------|----------------------------------------------|-----|--------|--------|---------|---------|--------------|--------------|---------|-----------|
| gene2014 | gene2014 | agrB        | gi 57650036 ref NC_002951.2 :2083137-2083844 | MVR | M36C05 | OK     | 101.836 | 827.743 | 3.02294      | -3.55066     | 0.00038 | 0.0163585 |
| gene2015 | gene2015 | agrD        | gi 57650036 ref NC_002951.2 :2083137-2083844 | MVR | M36C05 | OK     | 17.282  | 236.044 | 3.77171      | -0.212414    | 0.83178 | 0.999883  |
| gene2016 | gene2016 | argC2       | gi 57650036 ref NC_002951.2 :2083868-2085161 | MVR | M36C05 | OK     | 41.4691 | 292.196 | 2.81683      | -3.32443     | 0.00089 | 0.0317428 |
| gene2017 | gene2017 | agrA        | gi 57650036 ref NC_002951.2 :2085179-2085896 | MVR | M36C05 | OK     | 86.3352 | 413.396 | 2.2595       | -2.73448     | 0.00625 | 0.123837  |
| gene2018 | gene2018 | SACOL2028   | gi 57650036 ref NC_002951.2 :2086262-2088703 | MVR | M36C05 | OK     | 36.2302 | 39.4685 | 0.123512     | -0.098958    | 0.92117 | 0.999883  |
| gene2019 | gene2019 | cscA        | gi 57650036 ref NC_002951.2 :2086262-2088703 | MVR | M36C05 | OK     | 29.6371 | 36.8859 | 0.315663     | -0.30881     | 0.75747 | 0.999883  |
| gene202  | gene202  | SACOL0208   | gi 57650036 ref NC_002951.2 :245110-245455   | MVR | M36C05 | OK     | 4.96237 | 2.97348 | -0.738875    | 0.748764     | 0.454   | 0.999883  |
| gene2020 | gene2020 | scrR        | gi 57650036 ref NC_002951.2 :2088851-2089802 | MVR | M36C05 | OK     | 41.022  | 48.3123 | 0.235992     | -0.32357     | 0.74626 | 0.999883  |
| gene2021 | gene2021 | SACOL2031   | gi 57650036 ref NC_002951.2 :2089984-2091235 | MVR | M36C05 | OK     | 1.70836 | 2.3077  | 0.433843     | -0.579959    | 0.56194 | 0.999883  |
| gene2022 | gene2022 | SACOL2033   | gi 57650036 ref NC_002951.2 :2091441-2091666 | MVR | M36C05 | OK     | 5.74352 | 0       | -1.79769e+30 | -1.79769e+30 | 0.06333 | 0.504373  |
| gene2023 | gene2023 | SACOL2034   | gi 57650036 ref NC_002951.2 :2091725-2092805 | MVR | M36C05 | OK     | 3.68915 | 1.87948 | -0.972954    | 1.31107      | 0.18983 | 0.848649  |
| gene2024 | gene2024 | SACOL2035   | gi 57650036 ref NC_002951.2 :2093108-2093744 | MVR | M36C05 | OK     | 78.3212 | 113.157 | 0.530853     | -0.71337     | 0.47562 | 0.999883  |
| gene2025 | gene2025 | SACOL2036   | gi 57650036 ref NC_002951.2 :2093996-2095925 | MVR | M36C05 | OK     | 11.6292 | 10.5812 | -0.136256    | 0.195983     | 0.84462 | 0.999883  |
| gene2026 | gene2026 | SACOL2037   | gi 57650036 ref NC_002951.2 :2096286-2097897 | MVR | M36C05 | OK     | 4.97582 | 5.46814 | 0.136117     | -0.199827    | 0.84162 | 0.999883  |
| gene2027 | gene2027 | SACOL2038   | gi 57650036 ref NC_002951.2 :2097998-2100531 | MVR | M36C05 | OK     | 28.583  | 13.7503 | -1.05569     | 1.12489      | 0.26063 | 0.940753  |
| gene2028 | gene2028 | SACOL2039   | gi 57650036 ref NC_002951.2 :2097998-2100531 | MVR | M36C05 | OK     | 21.7387 | 9.16345 | -1.24631     | 0.624142     | 0.53253 | 0.999883  |
| gene2029 | gene2029 | SACOL2040   | gi 57650036 ref NC_002951.2 :2097998-2100531 | MVR | M36C05 | OK     | 11.852  | 10.0111 | -0.243543    | 0.140744     | 0.88807 | 0.999883  |
| gene203  | gene203  | SACOL0209   | gi 57650036 ref NC_002951.2 :245644-247555   | MVR | M36C05 | NOTEST | 0.9361  | 0.77295 | -0.276282    | 0.350377     | 0.72606 | 1         |
| gene2030 | gene2030 | SACOL2041   | gi 57650036 ref NC_002951.2 :2097998-2100531 | MVR | M36C05 | OK     | 12.6431 | 11.2605 | -0.167085    | 0.070684     | 0.94365 | 0.999883  |
| gene2031 | gene2031 | ilvD        | gi 57650036 ref NC_002951.2 :2101068-2102757 | MVR | M36C05 | OK     | 3.63302 | 4.51534 | 0.313666     | -0.457952    | 0.64699 | 0.999883  |
| gene2032 | gene2032 | ilvB        | gi 57650036 ref NC_002951.2 :2102784-2104808 | MVR | M36C05 | OK     | 4.57766 | 7.16049 | 0.645447     | -0.924044    | 0.35546 | 0.999883  |
| gene2033 | gene2033 | SACOL2044   | gi 57650036 ref NC_002951.2 :2102784-2104808 | MVR | M36C05 | OK     | 9.67064 | 3.09171 | -1.64521     | 0.416953     | 0.67671 | 0.999883  |
| gene2034 | gene2034 | ilvC        | gi 57650036 ref NC_002951.2 :2104944-2105949 | MVR | M36C05 | OK     | 4.11817 | 9.31497 | 1.17755      | -1.69183     | 0.09068 | 0.604003  |
| gene2035 | gene2035 | leuA        | gi 57650036 ref NC_002951.2 :2105978-2107508 | MVR | M36C05 | OK     | 4.79175 | 8.03906 | 0.746473     | -1.0941      | 0.27391 | 0.958793  |
| gene2036 | gene2036 | leuB        | gi 57650036 ref NC_002951.2 :2107510-2108557 | MVR | M36C05 | OK     | 5.40025 | 10.2846 | 0.929392     | -1.3527      | 0.17615 | 0.821477  |
| gene2037 | gene2037 | leuC        | gi 57650036 ref NC_002951.2 :2108570-2109941 | MVR | M36C05 | OK     | 3.87517 | 6.02485 | 0.636664     | -0.92565     | 0.35463 | 0.999883  |
| gene2038 | gene2038 | leuD        | gi 57650036 ref NC_002951.2 :2109941-2110514 | MVR | M36C05 | OK     | 3.68359 | 4.73583 | 0.362507     | -0.462312    | 0.64386 | 0.999883  |
| gene2039 | gene2039 | ilvA2       | gi 57650036 ref NC_002951.2 :2110528-2111797 | MVR | M36C05 | OK     | 3.86157 | 5.5689  | 0.528206     | -0.763815    | 0.44498 | 0.999883  |
| gene204  | gene204  | SACOL0210   | gi 57650036 ref NC_002951.2 :248020-249342   | MVR | M36C05 | NOTEST | 0       | 0       | 0            | 0            | 1       | 1         |
| gene2040 | gene2040 | rrfE        | gi 57650036 ref NC_002951.2 :2112006-2112121 | MVR | M36C05 | OK     | 867420  | 602455  | -0.525878    | 0.572879     | 0.56673 | 0.999883  |
| gene2041 | gene2041 | rrfE        | gi 57650036 ref NC_002951.2 :2112193-2115116 | MVR | M36C05 | HIDATA | 0       | 39229.6 | 0            | 0            | 1       | 1         |
| gene2042 | gene2042 | rrsE        | gi 57650036 ref NC_002951.2 :2115662-2117217 | MVR | M36C05 | OK     | 11237.5 | 14081.6 | 0.325488     | -0.463689    | 0.64287 | 0.999883  |
| gene2043 | gene2043 | SACOL_tRNA- | gi 57650036 ref NC_002951.2 :2117334-2117408 | MVR | M36C05 | NOTEST | 0       | 0       | 0            | 0            | 1       | 1         |



|          |          |             |                                              |     |        |        |         |         |                               |           |         |          |
|----------|----------|-------------|----------------------------------------------|-----|--------|--------|---------|---------|-------------------------------|-----------|---------|----------|
| gene2044 | gene2044 | SACOL_tRNA- | gi 57650036 ref NC_002951.2 :2117427-2117513 | MVR | M36C05 | NOTEST | 0       | 0       | 0                             | 0         | 1       | 1        |
| gene2045 | gene2045 | SACOL2052   | gi 57650036 ref NC_002951.2 :2118159-2120758 | MVR | M36C05 | OK     | 22.312  | 8.62137 | -1.37183                      | 0.474963  | 0.63481 | 0.999883 |
| gene2046 | gene2046 | SACOL2053   | gi 57650036 ref NC_002951.2 :2118159-2120758 | MVR | M36C05 | OK     | 37.6681 | 14.2909 | -1.39825                      | 1.76962   | 0.07679 | 0.551324 |
| gene2047 | gene2047 | rpoF        | gi 57650036 ref NC_002951.2 :2121191-2122416 | MVR | M36C05 | OK     | 104.005 | 144.905 | 0.478461                      | -0.538731 | 0.59007 | 0.999883 |
| gene2048 | gene2048 | rsbW        | gi 57650036 ref NC_002951.2 :2121191-2122416 | MVR | M36C05 | OK     | 42.1143 | 68.6088 | 0.704084                      | -0.363609 | 0.71615 | 0.999883 |
| gene2049 | gene2049 | rsbV        | gi 57650036 ref NC_002951.2 :2122417-2122744 | MVR | M36C05 | OK     | 74.5201 | 123.749 | 0.731712                      | -1.0683   | 0.28539 | 0.973566 |
| gene205  | gene205  | SACOL0211   | gi 57650036 ref NC_002951.2 :248020-249342   | MVR | M36C05 | OK     | 121.224 | 68.1655 | -0.830557                     | 1.01931   | 0.30806 | 0.991033 |
| gene2050 | gene2050 | rsbU        | gi 57650036 ref NC_002951.2 :2122863-2123865 | MVR | M36C05 | OK     | 62.2361 | 35.1994 | -0.8222                       | 1.11311   | 0.26566 | 0.948965 |
| gene2051 | gene2051 | SACOL2058   | gi 57650036 ref NC_002951.2 :2124214-2124744 | MVR | M36C05 | OK     | 95.7431 | 59.4051 | -0.688581                     | 0.958428  | 0.33785 | 0.999883 |
| gene2052 | gene2052 | SACOL2059   | gi 57650036 ref NC_002951.2 :2124214-2124744 | MVR | M36C05 | OK     | 113.077 | 68.6965 | -0.718998                     | 0.317542  | 0.75083 | 0.999883 |
| gene2053 | gene2053 | alr         | gi 57650036 ref NC_002951.2 :2124828-2125977 | MVR | M36C05 | OK     | 63.7919 | 46.8206 | -0.446231                     | 0.584368  | 0.55897 | 0.999883 |
| gene2054 | gene2054 | acpS        | gi 57650036 ref NC_002951.2 :2126042-2126402 | MVR | M36C05 | OK     | 45.4873 | 25.8068 | -0.817712                     | 1.18548   | 0.23583 | 0.904919 |
| gene2055 | gene2055 | SACOL2062   | gi 57650036 ref NC_002951.2 :2126405-2128939 | MVR | M36C05 | OK     | 36.1575 | 29.1956 | -0.308544                     | 0.131136  | 0.89567 | 0.999883 |
| gene2056 | gene2056 | SACOL2063   | gi 57650036 ref NC_002951.2 :2126405-2128939 | MVR | M36C05 | OK     | 43.263  | 45.2362 | 0.0643455                     | -0.070483 | 0.94381 | 0.999883 |
| gene2057 | gene2057 | SACOL2064   | gi 57650036 ref NC_002951.2 :2126405-2128939 | MVR | M36C05 | OK     | 29.3662 | 37.0645 | 0.335884                      | -0.139953 | 0.8887  | 0.999883 |
| gene2058 | gene2058 | SACOL2065   | gi 57650036 ref NC_002951.2 :2129034-2129708 | MVR | M36C05 | NOTEST | 0       | 0       | 0                             | 0         | 1       | 1        |
| gene2059 | gene2059 | kdpC        | gi 57650036 ref NC_002951.2 :2129034-2129708 | MVR | M36C05 | OK     | 14.2166 | 7.95193 | -0.838199                     | 1.18578   | 0.23571 | 0.904919 |
| gene206  | gene206  | SACOL0212   | gi 57650036 ref NC_002951.2 :249371-251633   | MVR | M36C05 | OK     | 110.495 | 54.7264 | -1.01367                      | 1.16565   | 0.24375 | 0.916865 |
| gene2060 | gene2060 | kdpB        | gi 57650036 ref NC_002951.2 :2129727-2131755 | MVR | M36C05 | OK     | 2.95042 | 2.65268 | -0.153469                     | 0.222683  | 0.82378 | 0.999883 |
| gene2061 | gene2061 | kdpA        | gi 57650036 ref NC_002951.2 :2131773-2133450 | MVR | M36C05 | OK     | 1.48936 | 1.11936 | -0.412023                     | 0.544539  | 0.58607 | 0.999883 |
| gene2062 | gene2062 | kdpF        | gi 57650036 ref NC_002951.2 :2133473-2133584 | MVR | M36C05 | NOTEST | 0       | 0       | 0                             | 0         | 1       | 1        |
| gene2063 | gene2063 | kdpD        | gi 57650036 ref NC_002951.2 :2133721-2137074 | MVR | M36C05 | OK     | 2.11475 | 2.55534 | 0.273033                      | -0.343738 | 0.73104 | 0.999883 |
| gene2064 | gene2064 | kdpE        | gi 57650036 ref NC_002951.2 :2133721-2137074 | MVR | M36C05 | OK     | 4.21142 | 4.22697 | 0.00531692                    | -0.004004 | 0.99681 | 0.999883 |
| gene2065 | gene2065 | SACOL2072   | gi 57650036 ref NC_002951.2 :2137442-2138963 | MVR | M36C05 | OK     | 230.427 | 25.3663 | -3.18332                      | 3.81468   | 0.00014 | 0.007591 |
| gene2066 | gene2066 | murF        | gi 57650036 ref NC_002951.2 :2139479-2140838 | MVR | M36C05 | OK     | 79.0441 | 68.9574 | -0.196952                     | 0.243773  | 0.80741 | 0.999883 |
| gene2067 | gene2067 | ddl         | gi 57650036 ref NC_002951.2 :2140852-2141923 | MVR | M36C05 | OK     | 87.5468 | 98.364  | 0.168076                      | -0.209547 | 0.83402 | 0.999883 |
| gene2068 | gene2068 | ftsW        | gi 57650036 ref NC_002951.2 :2142240-2143443 | MVR | M36C05 | OK     | 58.2432 | 48.2548 | -0.271418                     | 0.354656  | 0.72285 | 0.999883 |
| gene2069 | gene2069 | SACOL2076   | gi 57650036 ref NC_002951.2 :2143706-2143844 | MVR | M36C05 | OK     | 16790.5 | 37366.6 | 1.15411                       | -1.44345  | 0.14889 | 0.749859 |
| gene207  | gene207  | SACOL0213   | gi 57650036 ref NC_002951.2 :251818-253030   | MVR | M36C05 | OK     | 122.114 | 59.8088 | -1.0298                       | 1.27043   | 0.20393 | 0.875882 |
| gene2070 | gene2070 | SACOL2077   | gi 57650036 ref NC_002951.2 :2143971-2144181 | MVR | M36C05 | OK     | 9.23386 | 0       | -1.79769e+3(-1.79769e+0.04385 |           |         | 0.40838  |
| gene2071 | gene2071 | SACOL2078   | gi 57650036 ref NC_002951.2 :2144192-2144486 | MVR | M36C05 | OK     | 4.61712 | 0       | -1.79769e+3(-1.79769e+0.02679 |           |         | 0.309278 |
| gene2072 | gene2072 | cls2        | gi 57650036 ref NC_002951.2 :2144651-2146136 | MVR | M36C05 | OK     | 19.1551 | 31.3101 | 0.708897                      | -0.975903 | 0.32911 | 0.999883 |
| gene2073 | gene2073 | SACOL2080   | gi 57650036 ref NC_002951.2 :2146163-2146811 | MVR | M36C05 | OK     | 20.9571 | 22.1719 | 0.0812962                     | -0.119521 | 0.90486 | 0.999883 |

|          |          |           |                                              |     |        |        |         |         |            |           |         |          |
|----------|----------|-----------|----------------------------------------------|-----|--------|--------|---------|---------|------------|-----------|---------|----------|
| gene2074 | gene2074 | SACOL2081 | gi 57650036 ref NC_002951.2 :2146985-2147078 | MVR | M36C05 | NOTEST | 0       | 0       | 0          | 0         | 1       | 1        |
| gene2075 | gene2075 | SACOL2082 | gi 57650036 ref NC_002951.2 :2147623-2148496 | MVR | M36C05 | OK     | 227.048 | 87.6795 | -1.37268   | 1.67458   | 0.09402 | 0.615302 |
| gene2076 | gene2076 | thiE      | gi 57650036 ref NC_002951.2 :2148581-2149223 | MVR | M36C05 | OK     | 2.23763 | 2.49705 | 0.158251   | -0.187672 | 0.85113 | 0.999883 |
| gene2077 | gene2077 | thiM      | gi 57650036 ref NC_002951.2 :2149224-2151512 | MVR | M36C05 | OK     | 2.67646 | 2.60881 | -0.0369352 | 0.032244  | 0.97428 | 0.999883 |
| gene2078 | gene2078 | thiD2     | gi 57650036 ref NC_002951.2 :2149224-2151512 | MVR | M36C05 | OK     | 3.46787 | 2.62215 | -0.403296  | 0.387593  | 0.69832 | 0.999883 |
| gene2079 | gene2079 | SACOL2086 | gi 57650036 ref NC_002951.2 :2149224-2151512 | MVR | M36C05 | OK     | 1.00367 | 1.80161 | 0.843997   | -0.462425 | 0.64378 | 0.999883 |
| gene208  | gene208  | SACOL0214 | gi 57650036 ref NC_002951.2 :253141-254647   | MVR | M36C05 | OK     | 130.43  | 70.4748 | -0.8881    | 1.05006   | 0.29369 | 0.976946 |
| gene2080 | gene2080 | SACOL2088 | gi 57650036 ref NC_002951.2 :2151897-2152593 | MVR | M36C05 | OK     | 20.4378 | 35.5956 | 0.800458   | -1.16635  | 0.24347 | 0.916764 |
| gene2081 | gene2081 | SACOL2089 | gi 57650036 ref NC_002951.2 :2152981-2153377 | MVR | M36C05 | OK     | 5.33004 | 14.0053 | 1.39375    | -1.75863  | 0.07864 | 0.557414 |
| gene2082 | gene2082 | ywpF      | gi 57650036 ref NC_002951.2 :2153570-2154011 | MVR | M36C05 | OK     | 41.7322 | 54.0021 | 0.371853   | -0.545217 | 0.5856  | 0.999883 |
| gene2083 | gene2083 | fabZ      | gi 57650036 ref NC_002951.2 :2154069-2154510 | MVR | M36C05 | OK     | 75.7065 | 142.327 | 0.910725   | -1.27978  | 0.20062 | 0.869538 |
| gene2084 | gene2084 | murAA     | gi 57650036 ref NC_002951.2 :2154543-2155809 | MVR | M36C05 | OK     | 59.2128 | 151.715 | 1.35738    | -1.64301  | 0.10038 | 0.638047 |
| gene2085 | gene2085 | SACOL2093 | gi 57650036 ref NC_002951.2 :2155919-2156153 | MVR | M36C05 | OK     | 147.327 | 160.013 | 0.119164   | -0.174995 | 0.86108 | 0.999883 |
| gene2086 | gene2086 | atpC      | gi 57650036 ref NC_002951.2 :2156714-2157119 | MVR | M36C05 | OK     | 389.945 | 156.083 | -1.32096   | 1.73726   | 0.08234 | 0.571339 |
| gene2087 | gene2087 | atpD      | gi 57650036 ref NC_002951.2 :2157138-2158551 | MVR | M36C05 | OK     | 215.593 | 104.054 | -1.05098   | 1.19301   | 0.23286 | 0.902162 |
| gene2088 | gene2088 | atpG      | gi 57650036 ref NC_002951.2 :2158572-2159439 | MVR | M36C05 | OK     | 187.516 | 93.7609 | -0.999953  | 1.2316    | 0.2181  | 0.89416  |
| gene2089 | gene2089 | atpA      | gi 57650036 ref NC_002951.2 :2159469-2160978 | MVR | M36C05 | OK     | 202.585 | 99.2805 | -1.02894   | 1.16523   | 0.24393 | 0.917031 |
| gene209  | gene209  | SACOL0215 | gi 57650036 ref NC_002951.2 :254672-256244   | MVR | M36C05 | OK     | 302.89  | 339.67  | 0.165342   | -0.172744 | 0.86285 | 0.999883 |
| gene2090 | gene2090 | atpH      | gi 57650036 ref NC_002951.2 :2160999-2162060 | MVR | M36C05 | OK     | 151.746 | 89.3083 | -0.764796  | 0.72127   | 0.47074 | 0.999883 |
| gene2091 | gene2091 | atpF      | gi 57650036 ref NC_002951.2 :2160999-2162060 | MVR | M36C05 | OK     | 139.489 | 68.9278 | -1.017     | 0.857868  | 0.39097 | 0.999883 |
| gene2092 | gene2092 | atpE      | gi 57650036 ref NC_002951.2 :2162257-2162470 | MVR | M36C05 | OK     | 568.551 | 249.303 | -1.18939   | 1.72934   | 0.08375 | 0.575114 |
| gene2093 | gene2093 | atpB      | gi 57650036 ref NC_002951.2 :2162512-2163241 | MVR | M36C05 | OK     | 232.709 | 137.866 | -0.755265  | 0.924041  | 0.35547 | 0.999883 |
| gene2094 | gene2094 | SACOL2102 | gi 57650036 ref NC_002951.2 :2163261-2163615 | MVR | M36C05 | OK     | 175.327 | 106.944 | -0.713201  | 1.02025   | 0.30761 | 0.991033 |
| gene2095 | gene2095 | SACOL2103 | gi 57650036 ref NC_002951.2 :2163781-2164909 | MVR | M36C05 | OK     | 158.623 | 238.336 | 0.587398   | -0.66738  | 0.50453 | 0.999883 |
| gene2096 | gene2096 | upp       | gi 57650036 ref NC_002951.2 :2164932-2165562 | MVR | M36C05 | OK     | 108.273 | 183.531 | 0.761351   | -0.980234 | 0.32697 | 0.999883 |
| gene2097 | gene2097 | glyA      | gi 57650036 ref NC_002951.2 :2165589-2166828 | MVR | M36C05 | OK     | 172.567 | 266.649 | 0.627786   | -0.697837 | 0.48528 | 0.999883 |
| gene2098 | gene2098 | SACOL2106 | gi 57650036 ref NC_002951.2 :2166854-2167379 | MVR | M36C05 | OK     | 97.3756 | 158.667 | 0.704367   | -0.948761 | 0.34274 | 0.999883 |
| gene2099 | gene2099 | SACOL2107 | gi 57650036 ref NC_002951.2 :2167485-2168957 | MVR | M36C05 | OK     | 27.427  | 10.0127 | -1.45376   | 1.13729   | 0.25542 | 0.93309  |
| gene21   | gene21   | yycG      | gi 57650036 ref NC_002951.2 :25665-28819     | MVR | M36C05 | OK     | 99.6093 | 126.81  | 0.348312   | -0.295653 | 0.7675  | 0.999883 |
| gene210  | gene210  | SACOL0216 | gi 57650036 ref NC_002951.2 :256690-257833   | MVR | M36C05 | OK     | 9.4817  | 4.79372 | -0.984     | 1.43286   | 0.1519  | 0.758126 |
| gene2100 | gene2100 | SACOL2108 | gi 57650036 ref NC_002951.2 :2167485-2168957 | MVR | M36C05 | OK     | 13.2141 | 7.60009 | -0.797985  | 0.978018  | 0.32807 | 0.999883 |
| gene2101 | gene2101 | SACOL2109 | gi 57650036 ref NC_002951.2 :2169031-2170931 | MVR | M36C05 | OK     | 73.2574 | 21.6452 | -1.75893   | 1.64817   | 0.09932 | 0.636777 |
| gene2102 | gene2102 | prfA      | gi 57650036 ref NC_002951.2 :2169031-2170931 | MVR | M36C05 | OK     | 51.7611 | 14.2072 | -1.86524   | 1.70157   | 0.08884 | 0.597944 |

|          |          |           |                                              |     |        |        |         |         |             |             |          |           |
|----------|----------|-----------|----------------------------------------------|-----|--------|--------|---------|---------|-------------|-------------|----------|-----------|
| gene2103 | gene2103 | tdk       | gi 57650036 ref NC_002951.2 :2170931-2171531 | MVR | M36C05 | OK     | 63.1114 | 19.0424 | -1.72868    | 2.49208     | 0.0127   | 0.19349   |
| gene2104 | gene2104 | rpmE2     | gi 57650036 ref NC_002951.2 :2171877-2172132 | MVR | M36C05 | OK     | 659.538 | 75.7468 | -3.1222     | 4.35883     | 1.31E-05 | 0.0009857 |
| gene2105 | gene2105 | rho       | gi 57650036 ref NC_002951.2 :2172249-2173566 | MVR | M36C05 | OK     | 139.441 | 45.5961 | -1.61267    | 1.97673     | 0.04807  | 0.430141  |
| gene2106 | gene2106 | SACOL2114 | gi 57650036 ref NC_002951.2 :2173812-2175240 | MVR | M36C05 | OK     | 41.3865 | 566.421 | 3.77464     | -4.30965    | 1.64E-05 | 0.0012075 |
| gene2107 | gene2107 | SACOL2115 | gi 57650036 ref NC_002951.2 :2175477-2175813 | MVR | M36C05 | OK     | 839.249 | 871.614 | 0.0545916   | -0.065339   | 0.9479   | 0.999883  |
| gene2108 | gene2108 | murAB     | gi 57650036 ref NC_002951.2 :2175901-2177161 | MVR | M36C05 | OK     | 77.2812 | 71.8669 | -0.10479    | 0.130978    | 0.89579  | 0.999883  |
| gene2109 | gene2109 | fbaA      | gi 57650036 ref NC_002951.2 :2177626-2178487 | MVR | M36C05 | OK     | 213.607 | 134.828 | -0.663839   | 0.795839    | 0.42613  | 0.999883  |
| gene211  | gene211  | SACOL0217 | gi 57650036 ref NC_002951.2 :258146-259622   | MVR | M36C05 | OK     | 12.2857 | 12.5261 | 0.0279476   | -0.040583   | 0.96763  | 0.999883  |
| gene2110 | gene2110 | SACOL2118 | gi 57650036 ref NC_002951.2 :2178704-2179226 | MVR | M36C05 | OK     | 22.9217 | 9.25895 | -1.30779    | 1.87037     | 0.06143  | 0.500658  |
| gene2111 | gene2111 | pyrG      | gi 57650036 ref NC_002951.2 :2179334-2180945 | MVR | M36C05 | OK     | 38.6259 | 9.21773 | -2.06708    | 2.84518     | 0.00444  | 0.0985356 |
| gene2112 | gene2112 | rpoE      | gi 57650036 ref NC_002951.2 :2181280-2181811 | MVR | M36C05 | OK     | 130.866 | 45.0353 | -1.53896    | 2.14751     | 0.03175  | 0.342022  |
| gene2113 | gene2113 | SACOL2121 | gi 57650036 ref NC_002951.2 :2181922-2182783 | MVR | M36C05 | OK     | 30.4759 | 14.0167 | -1.12052    | 1.62852     | 0.10342  | 0.645527  |
| gene2114 | gene2114 | SACOL2122 | gi 57650036 ref NC_002951.2 :2183206-2184010 | MVR | M36C05 | OK     | 16.9364 | 6.20962 | -1.44755    | 2.09397     | 0.03626  | 0.365532  |
| gene2115 | gene2115 | SACOL2123 | gi 57650036 ref NC_002951.2 :2184139-2184811 | MVR | M36C05 | OK     | 38.3658 | 23.1467 | -0.729016   | 1.06211     | 0.28819  | 0.975616  |
| gene2116 | gene2116 | SACOL2124 | gi 57650036 ref NC_002951.2 :2185209-2187587 | MVR | M36C05 | OK     | 41.1786 | 35.0494 | -0.232503   | 0.211613    | 0.83241  | 0.999883  |
| gene2117 | gene2117 | SACOL2125 | gi 57650036 ref NC_002951.2 :2185209-2187587 | MVR | M36C05 | OK     | 30.9753 | 39.0636 | 0.334708    | -0.290192   | 0.77167  | 0.999883  |
| gene2118 | gene2118 | luxS      | gi 57650036 ref NC_002951.2 :2187897-2188368 | MVR | M36C05 | OK     | 111.293 | 108.761 | -0.0331956  | 0.046196    | 0.96315  | 0.999883  |
| gene2119 | gene2119 | SACOL2127 | gi 57650036 ref NC_002951.2 :2188519-2188870 | MVR | M36C05 | OK     | 277.636 | 270.802 | -0.0359577  | 0.048369    | 0.96142  | 0.999883  |
| gene212  | gene212  | SACOL0218 | gi 57650036 ref NC_002951.2 :259819-260176   | MVR | M36C05 | OK     | 3.75796 | 6.2204  | 0.727058    | -0.791216   | 0.42882  | 0.999883  |
| gene2120 | gene2120 | pdp       | gi 57650036 ref NC_002951.2 :2188883-2190185 | MVR | M36C05 | OK     | 102.157 | 119.044 | 0.220717    | -0.261917   | 0.79339  | 0.999883  |
| gene2121 | gene2121 | deoC2     | gi 57650036 ref NC_002951.2 :2190463-2191126 | MVR | M36C05 | OK     | 68.8484 | 74.3678 | 0.111255    | -0.152874   | 0.8785   | 0.999883  |
| gene2122 | gene2122 | deoD      | gi 57650036 ref NC_002951.2 :2191440-2192151 | MVR | M36C05 | OK     | 107.927 | 67.1545 | -0.684504   | 0.913961    | 0.36074  | 0.999883  |
| gene2123 | gene2123 | SACOL2131 | gi 57650036 ref NC_002951.2 :2192271-2192715 | MVR | M36C05 | OK     | 1579.41 | 1778.93 | 0.171624    | -0.180858   | 0.85648  | 0.999883  |
| gene2124 | gene2124 | SACOL2132 | gi 57650036 ref NC_002951.2 :2192914-2193328 | MVR | M36C05 | OK     | 4.85919 | 28.8047 | 2.56752     | -3.31044    | 0.00093  | 0.0326101 |
| gene2125 | gene2125 | SACOL2133 | gi 57650036 ref NC_002951.2 :2193785-2195159 | MVR | M36C05 | OK     | 31.1748 | 30.235  | -0.0441612  | 0.060045    | 0.95212  | 0.999883  |
| gene2126 | gene2126 | SACOL2134 | gi 57650036 ref NC_002951.2 :2195830-2196061 | MVR | M36C05 | OK     | 23.6471 | 6.25566 | -1.91843    | 1.93303     | 0.05323  | 0.45686   |
| gene2127 | gene2127 | manA1     | gi 57650036 ref NC_002951.2 :2196091-2197030 | MVR | M36C05 | OK     | 34.1042 | 22.385  | -0.607421   | 0.868716    | 0.385    | 0.999883  |
| gene2128 | gene2128 | SACOL2136 | gi 57650036 ref NC_002951.2 :2197464-2198130 | MVR | M36C05 | OK     | 15.7397 | 170.274 | 3.43539     | -4.61773    | 3.88E-06 | 0.00036   |
| gene2129 | gene2129 | czrA      | gi 57650036 ref NC_002951.2 :2198281-2198602 | MVR | M36C05 | OK     | 42.1089 | 13.0742 | -1.6874     | 2.3027      | 0.0213   | 0.273297  |
| gene213  | gene213  | SACOL0219 | gi 57650036 ref NC_002951.2 :260332-260506   | MVR | M36C05 | OK     | 0       | 6.93814 | 1.79769e+30 | 1.79769e+30 | 0.14732  | 0.743774  |
| gene2130 | gene2130 | SACOL2138 | gi 57650036 ref NC_002951.2 :2198603-2199584 | MVR | M36C05 | OK     | 32.4445 | 19.6267 | -0.725159   | 1.0384      | 0.29908  | 0.981582  |
| gene2131 | gene2131 | SACOL2139 | gi 57650036 ref NC_002951.2 :2199793-2200941 | MVR | M36C05 | NOTEST | 0       | 0       | 0           | 0           | 1        | 1         |
| gene2132 | gene2132 | SACOL2140 | gi 57650036 ref NC_002951.2 :2199793-2200941 | MVR | M36C05 | OK     | 159.54  | 160.442 | 0.00813402  | -0.009252   | 0.99262  | 0.999883  |

|          |          |             |                                              |     |        |        |         |         |            |           |          |           |
|----------|----------|-------------|----------------------------------------------|-----|--------|--------|---------|---------|------------|-----------|----------|-----------|
| gene2133 | gene2133 | SACOL2141   | gi 57650036 ref NC_002951.2 :2201903-2202107 | MVR | M36C05 | OK     | 6.21505 | 3.28328 | -0.920629  | 0.524183  | 0.60015  | 0.999883  |
| gene2134 | gene2134 | SACOL2142   | gi 57650036 ref NC_002951.2 :2202165-2203302 | MVR | M36C05 | OK     | 11.914  | 11.1786 | -0.0919169 | 0.134974  | 0.89263  | 0.999883  |
| gene2135 | gene2135 | SACOL2143   | gi 57650036 ref NC_002951.2 :2204387-2205257 | MVR | M36C05 | OK     | 39.4652 | 51.362  | 0.380119   | -0.526587 | 0.59848  | 0.999883  |
| gene2136 | gene2136 | SACOL2144   | gi 57650036 ref NC_002951.2 :2205312-2206095 | MVR | M36C05 | OK     | 7.11261 | 10.975  | 0.62577    | -0.905427 | 0.36524  | 0.999883  |
| gene2137 | gene2137 | glmS        | gi 57650036 ref NC_002951.2 :2206326-2208132 | MVR | M36C05 | OK     | 30.3164 | 34.1073 | 0.169985   | -0.222694 | 0.82377  | 0.999883  |
| gene2138 | gene2138 | SACOL2146   | gi 57650036 ref NC_002951.2 :2208812-2210351 | MVR | M36C05 | OK     | 4.09182 | 4.69221 | 0.197525   | -0.288192 | 0.7732   | 0.999883  |
| gene2139 | gene2139 | SACOL2147   | gi 57650036 ref NC_002951.2 :2210385-2212518 | MVR | M36C05 | OK     | 4.62651 | 24.116  | 2.382      | -3.31274  | 0.00092  | 0.0326101 |
| gene214  | gene214  | SACOL0220   | gi 57650036 ref NC_002951.2 :260531-261677   | MVR | M36C05 | OK     | 61.5257 | 76.9222 | 0.322212   | -0.411829 | 0.68046  | 0.999883  |
| gene2140 | gene2140 | SACOL2148   | gi 57650036 ref NC_002951.2 :2212529-2214070 | MVR | M36C05 | OK     | 10.4443 | 234.593 | 4.48937    | -3.00084  | 0.00269  | 0.0714957 |
| gene2141 | gene2141 | mtID        | gi 57650036 ref NC_002951.2 :2212529-2214070 | MVR | M36C05 | OK     | 8.54356 | 131.655 | 3.94578    | -4.2463   | 2.17E-05 | 0.0014979 |
| gene2142 | gene2142 | fmtB        | gi 57650036 ref NC_002951.2 :2214388-2221825 | MVR | M36C05 | OK     | 2.4735  | 2.58789 | 0.0652224  | -0.094033 | 0.92508  | 0.999883  |
| gene2143 | gene2143 | glmM        | gi 57650036 ref NC_002951.2 :2222101-2223457 | MVR | M36C05 | OK     | 97.9045 | 92.0231 | -0.0893787 | 0.107351  | 0.91451  | 0.999883  |
| gene2144 | gene2144 | SACOL2152   | gi 57650036 ref NC_002951.2 :2223483-2224416 | MVR | M36C05 | OK     | 36.5371 | 31.1444 | -0.23039   | 0.325393  | 0.74488  | 0.999883  |
| gene2145 | gene2145 | SACOL2153   | gi 57650036 ref NC_002951.2 :2224417-2225227 | MVR | M36C05 | OK     | 74.0369 | 72.6964 | -0.0263597 | 0.035076  | 0.97202  | 0.999883  |
| gene2146 | gene2146 | rocF        | gi 57650036 ref NC_002951.2 :2225415-2226324 | MVR | M36C05 | OK     | 239.278 | 351.866 | 0.556336   | -0.62382  | 0.53275  | 0.999883  |
| gene2147 | gene2147 | SACOL2155   | gi 57650036 ref NC_002951.2 :2226549-2227752 | MVR | M36C05 | OK     | 1.01552 | 0.76944 | -0.400345  | 0.459382  | 0.64596  | 0.999883  |
| gene2149 | gene2149 | SACOL_tRNA- | gi 57650036 ref NC_002951.2 :2228058-2228133 | MVR | M36C05 | NOTEST | 0       | 0       | 0          | 0         | 1        | 1         |
| gene215  | gene215  | ldh1        | gi 57650036 ref NC_002951.2 :262249-263203   | MVR | M36C05 | OK     | 16.9822 | 38.4666 | 1.17958    | -1.68109  | 0.09275  | 0.611738  |
| gene2150 | gene2150 | SACOL_tRNA- | gi 57650036 ref NC_002951.2 :2228142-2228226 | MVR | M36C05 | NOTEST | 0       | 0       | 0          | 0         | 1        | 1         |
| gene2151 | gene2151 | SACOL_tRNA- | gi 57650036 ref NC_002951.2 :2228255-2228331 | MVR | M36C05 | NOTEST | 0       | 0       | 0          | 0         | 1        | 1         |
| gene2152 | gene2152 | SACOL_tRNA- | gi 57650036 ref NC_002951.2 :2228338-2228410 | MVR | M36C05 | NOTEST | 0       | 0       | 0          | 0         | 1        | 1         |
| gene2153 | gene2153 | SACOL_tRNA- | gi 57650036 ref NC_002951.2 :2228411-2228486 | MVR | M36C05 | NOTEST | 0       | 0       | 0          | 0         | 1        | 1         |
| gene2154 | gene2154 | rrfF        | gi 57650036 ref NC_002951.2 :2228496-2228611 | MVR | M36C05 | OK     | 863085  | 306801  | -1.4922    | 1.68178   | 0.09261  | 0.611738  |
| gene2155 | gene2155 | rrIF        | gi 57650036 ref NC_002951.2 :2228683-2231606 | MVR | M36C05 | HIDATA | 0       | 0       | 0          | 0         | 1        | 1         |
| gene2156 | gene2156 | rrsF        | gi 57650036 ref NC_002951.2 :2232152-2233707 | MVR | M36C05 | OK     | 10681   | 12926.1 | 0.275244   | -0.386086 | 0.69943  | 0.999883  |
| gene2157 | gene2157 | SACOL2156   | gi 57650036 ref NC_002951.2 :2234162-2235227 | MVR | M36C05 | OK     | 240.941 | 220.147 | -0.130214  | 0.146436  | 0.88358  | 0.999883  |
| gene2158 | gene2158 | SACOL2157   | gi 57650036 ref NC_002951.2 :2235374-2236817 | MVR | M36C05 | OK     | 26.292  | 41.5917 | 0.661669   | -0.887249 | 0.37495  | 0.999883  |
| gene2159 | gene2159 | SACOL2158   | gi 57650036 ref NC_002951.2 :2237138-2237612 | MVR | M36C05 | OK     | 106.253 | 36.6643 | -1.53506   | 2.20114   | 0.02773  | 0.315942  |
| gene216  | gene216  | SACOL0223   | gi 57650036 ref NC_002951.2 :263370-263496   | MVR | M36C05 | NOTEST | 0       | 0       | 0          | 0         | 1        | 1         |
| gene2160 | gene2160 | SACOL2159   | gi 57650036 ref NC_002951.2 :2237710-2239054 | MVR | M36C05 | OK     | 29.9209 | 10.6962 | -1.48406   | 2.09858   | 0.03585  | 0.362396  |
| gene2161 | gene2161 | SACOL2160   | gi 57650036 ref NC_002951.2 :2239230-2239914 | MVR | M36C05 | OK     | 138.914 | 81.8513 | -0.763118  | 1.00044   | 0.3171   | 0.999883  |
| gene2162 | gene2162 | SACOL2161   | gi 57650036 ref NC_002951.2 :2239932-2241120 | MVR | M36C05 | OK     | 126.913 | 142.166 | 0.163734   | -0.192352 | 0.84747  | 0.999883  |
| gene2163 | gene2163 | SACOL2162   | gi 57650036 ref NC_002951.2 :2241163-2241679 | MVR | M36C05 | OK     | 124.14  | 94.6975 | -0.390565  | 0.53542   | 0.59236  | 0.999883  |

|          |          |           |                                              |     |        |        |         |         |             |             |          |           |
|----------|----------|-----------|----------------------------------------------|-----|--------|--------|---------|---------|-------------|-------------|----------|-----------|
| gene2164 | gene2164 | SACOL2163 | gi 57650036 ref NC_002951.2 :2241856-2242117 | MVR | M36C05 | OK     | 1523.48 | 659.379 | -1.20819    | 1.52401     | 0.12751  | 0.707889  |
| gene2165 | gene2165 | SACOL2164 | gi 57650036 ref NC_002951.2 :2242248-2243619 | MVR | M36C05 | OK     | 70.263  | 10.7318 | -2.71088    | 3.63562     | 0.00028  | 0.0127829 |
| gene2166 | gene2166 | SACOL2165 | gi 57650036 ref NC_002951.2 :2243854-2245851 | MVR | M36C05 | OK     | 6.43639 | 2.72469 | -1.24016    | 1.22298     | 0.22134  | 0.89416   |
| gene2167 | gene2167 | SACOL2166 | gi 57650036 ref NC_002951.2 :2243854-2245851 | MVR | M36C05 | OK     | 6.80321 | 3.0483  | -1.15821    | 1.23852     | 0.21552  | 0.89416   |
| gene2168 | gene2168 | SACOL2167 | gi 57650036 ref NC_002951.2 :2245862-2246846 | MVR | M36C05 | OK     | 28.2384 | 7.0329  | -2.00547    | 2.89086     | 0.00384  | 0.0914612 |
| gene2169 | gene2169 | SACOL2168 | gi 57650036 ref NC_002951.2 :2247237-2248308 | MVR | M36C05 | OK     | 5.24728 | 14.5584 | 1.47221     | -2.13733    | 0.03257  | 0.346169  |
| gene217  | gene217  | SACOL0224 | gi 57650036 ref NC_002951.2 :263522-265052   | MVR | M36C05 | OK     | 2.73175 | 2.98357 | 0.127215    | -0.181227   | 0.85619  | 0.999883  |
| gene2170 | gene2170 | SACOL2169 | gi 57650036 ref NC_002951.2 :2248314-2251252 | MVR | M36C05 | OK     | 4.30844 | 22.3544 | 2.37532     | -2.86377    | 0.00419  | 0.0949739 |
| gene2171 | gene2171 | SACOL2170 | gi 57650036 ref NC_002951.2 :2248314-2251252 | MVR | M36C05 | OK     | 4.40122 | 3.88206 | -0.181084   | 0.098926    | 0.9212   | 0.999883  |
| gene2172 | gene2172 | SACOL2171 | gi 57650036 ref NC_002951.2 :2251353-2253330 | MVR | M36C05 | OK     | 13.5463 | 8.37261 | -0.694151   | 0.996072    | 0.31922  | 0.999883  |
| gene2173 | gene2173 | SACOL2172 | gi 57650036 ref NC_002951.2 :2253785-2255410 | MVR | M36C05 | OK     | 0.54271 | 1.46962 | 1.4372      | -1.74073    | 0.08173  | 0.568738  |
| gene2174 | gene2174 | SACOL2173 | gi 57650036 ref NC_002951.2 :2255445-2255955 | MVR | M36C05 | OK     | 613.801 | 13085   | 4.414       | -4.89478    | 9.84E-07 | 0.0001163 |
| gene2175 | gene2175 | SACOL2174 | gi 57650036 ref NC_002951.2 :2256017-2256257 | MVR | M36C05 | OK     | 111.485 | 2213.51 | 4.31141     | -5.5741     | 2.49E-08 | 5.00E-06  |
| gene2176 | gene2176 | SACOL2175 | gi 57650036 ref NC_002951.2 :2256269-2256818 | MVR | M36C05 | OK     | 99.038  | 3337.43 | 5.07461     | -5.8939     | 3.77E-09 | 9.87E-07  |
| gene2177 | gene2177 | opuD2     | gi 57650036 ref NC_002951.2 :2256980-2258543 | MVR | M36C05 | OK     | 26.0328 | 634.337 | 4.60684     | -5.31994    | 1.04E-07 | 1.71E-05  |
| gene2178 | gene2178 | SACOL2177 | gi 57650036 ref NC_002951.2 :2258849-2259851 | MVR | M36C05 | OK     | 20.8957 | 35.3369 | 0.75797     | -1.07658    | 0.28167  | 0.965951  |
| gene2179 | gene2179 | SACOL2178 | gi 57650036 ref NC_002951.2 :2260084-2261086 | MVR | M36C05 | OK     | 188.888 | 328.07  | 0.79647     | -0.895664   | 0.37043  | 0.999883  |
| gene218  | gene218  | SACOL0225 | gi 57650036 ref NC_002951.2 :265413-266349   | MVR | M36C05 | OK     | 10.6768 | 9.29021 | -0.200695   | 0.294577    | 0.76832  | 0.999883  |
| gene2180 | gene2180 | SACOL2179 | gi 57650036 ref NC_002951.2 :2261368-2262238 | MVR | M36C05 | OK     | 54.3099 | 106.675 | 0.973932    | -1.27571    | 0.20206  | 0.871437  |
| gene2181 | gene2181 | lacG      | gi 57650036 ref NC_002951.2 :2262503-2263916 | MVR | M36C05 | OK     | 3.8367  | 2.99892 | -0.35542    | 0.508926    | 0.6108   | 0.999883  |
| gene2182 | gene2182 | lacE      | gi 57650036 ref NC_002951.2 :2263933-2265963 | MVR | M36C05 | OK     | 1.95611 | 2.97493 | 0.604864    | -0.850507   | 0.39504  | 0.999883  |
| gene2183 | gene2183 | lacF      | gi 57650036 ref NC_002951.2 :2263933-2265963 | MVR | M36C05 | NOTEST | 0       | 0.92991 | 1.79769e+30 | 1.79769e+30 | 0.32694  | 1         |
| gene2184 | gene2184 | lacD      | gi 57650036 ref NC_002951.2 :2265984-2266965 | MVR | M36C05 | OK     | 2.00847 | 0.98839 | -1.02294    | 1.217       | 0.22361  | 0.89446   |
| gene2185 | gene2185 | lacC      | gi 57650036 ref NC_002951.2 :2266968-2267901 | MVR | M36C05 | OK     | 2.30934 | 1.05319 | -1.13271    | 1.35451     | 0.17558  | 0.821477  |
| gene2186 | gene2186 | lacB      | gi 57650036 ref NC_002951.2 :2267913-2268429 | MVR | M36C05 | OK     | 1.39932 | 0.69887 | -1.00162    | 0.816133    | 0.41442  | 0.999883  |
| gene2187 | gene2187 | SACOL2186 | gi 57650036 ref NC_002951.2 :2268444-2268873 | MVR | M36C05 | OK     | 1.97797 | 1.9252  | -0.0390091  | 0.037291    | 0.97025  | 0.999883  |
| gene2188 | gene2188 | SACOL2187 | gi 57650036 ref NC_002951.2 :2268887-2269004 | MVR | M36C05 | NOTEST | 0       | 0       | 0           | 0           | 1        | 1         |
| gene2189 | gene2189 | lacR      | gi 57650036 ref NC_002951.2 :2269240-2269996 | MVR | M36C05 | OK     | 15.4963 | 17.66   | 0.188562    | -0.27721    | 0.78162  | 0.999883  |
| gene219  | gene219  | SACOL0228 | gi 57650036 ref NC_002951.2 :266687-269236   | MVR | M36C05 | OK     | 1.90491 | 0.92951 | -1.03518    | 1.36736     | 0.17151  | 0.816663  |
| gene2190 | gene2190 | SACOL2189 | gi 57650036 ref NC_002951.2 :2270246-2270978 | MVR | M36C05 | OK     | 19.2204 | 24.8872 | 0.372763    | -0.546306   | 0.58486  | 0.999883  |
| gene2191 | gene2191 | SACOL2190 | gi 57650036 ref NC_002951.2 :2271268-2271877 | MVR | M36C05 | OK     | 0.91092 | 3.23871 | 1.83002     | -1.89534    | 0.05805  | 0.482975  |
| gene2192 | gene2192 | SACOL2191 | gi 57650036 ref NC_002951.2 :2272138-2272264 | MVR | M36C05 | NOTEST | 0       | 0       | 0           | 0           | 1        | 1         |
| gene2193 | gene2193 | SACOL2192 | gi 57650036 ref NC_002951.2 :2272483-2273332 | MVR | M36C05 | OK     | 77.5584 | 218.223 | 1.49245     | -1.84173    | 0.06552  | 0.512024  |

|          |          |           |                                              |     |        |        |         |         |                        |           |          |           |
|----------|----------|-----------|----------------------------------------------|-----|--------|--------|---------|---------|------------------------|-----------|----------|-----------|
| gene2194 | gene2194 | SACOL2193 | gi 57650036 ref NC_002951.2 :2273401-2273818 | MVR | M36C05 | OK     | 5.08722 | 12.1779 | 1.25932                | -1.5983   | 0.10998  | 0.659073  |
| gene2195 | gene2195 | hysA      | gi 57650036 ref NC_002951.2 :2274225-2276649 | MVR | M36C05 | OK     | 1.43569 | 3.02251 | 1.074                  | -1.54022  | 0.12351  | 0.696637  |
| gene2196 | gene2196 | SACOL2195 | gi 57650036 ref NC_002951.2 :2276708-2277563 | MVR | M36C05 | OK     | 16.7728 | 20.8812 | 0.31608                | -0.462779 | 0.64352  | 0.999883  |
| gene2197 | gene2197 | SACOL2196 | gi 57650036 ref NC_002951.2 :2277773-2278589 | MVR | M36C05 | OK     | 11.7535 | 15.9375 | 0.439328               | -0.645136 | 0.51884  | 0.999883  |
| gene2198 | gene2198 | SACOL2197 | gi 57650036 ref NC_002951.2 :2278882-2279308 | MVR | M36C05 | OK     | 10.6033 | 463.694 | 5.45058                | -6.92813  | 4.26E-12 | 2.58E-09  |
| gene2199 | gene2199 | budA1     | gi 57650036 ref NC_002951.2 :2279671-2280376 | MVR | M36C05 | OK     | 2.43098 | 2.40351 | -0.0163992             | 0.020093  | 0.98397  | 0.999883  |
| gene22   | gene22   | yycH      | gi 57650036 ref NC_002951.2 :25665-28819     | MVR | M36C05 | OK     | 98.0174 | 102.08  | 0.0585883              | -0.039066 | 0.96884  | 0.999883  |
| gene220  | gene220  | SACOL0229 | gi 57650036 ref NC_002951.2 :266687-269236   | MVR | M36C05 | NOTEST | 0.95453 | 0.41188 | -1.21255               | 0.39585   | 0.69222  | 1         |
| gene2200 | gene2200 | budB      | gi 57650036 ref NC_002951.2 :2280412-2282077 | MVR | M36C05 | OK     | 3.89645 | 3.837   | -0.0221832             | 0.032332  | 0.97421  | 0.999883  |
| gene2201 | gene2201 | SACOL2200 | gi 57650036 ref NC_002951.2 :2282356-2282452 | MVR | M36C05 | NOTEST | 0       | 0       | 0                      | 0         | 1        | 1         |
| gene2202 | gene2202 | SACOL2201 | gi 57650036 ref NC_002951.2 :2283266-2283866 | MVR | M36C05 | OK     | 7.77234 | 8.55529 | 0.138468               | -0.1944   | 0.84586  | 0.999883  |
| gene2203 | gene2203 | SACOL2202 | gi 57650036 ref NC_002951.2 :2283898-2284672 | MVR | M36C05 | OK     | 6.6974  | 8.6488  | 0.368899               | -0.529666 | 0.59634  | 0.999883  |
| gene2204 | gene2204 | SACOL2203 | gi 57650036 ref NC_002951.2 :2284800-2285937 | MVR | M36C05 | OK     | 12.4264 | 14.238  | 0.196337               | -0.287403 | 0.7738   | 0.999883  |
| gene2205 | gene2205 | SACOL2204 | gi 57650036 ref NC_002951.2 :2285937-2286729 | MVR | M36C05 | OK     | 16.4705 | 21.8022 | 0.404586               | -0.593256 | 0.55301  | 0.999883  |
| gene2206 | gene2206 | SACOL2205 | gi 57650036 ref NC_002951.2 :2286768-2288129 | MVR | M36C05 | OK     | 2.57187 | 5.41214 | 1.07338                | -1.53215  | 0.12549  | 0.701806  |
| gene2207 | gene2207 | rpsI      | gi 57650036 ref NC_002951.2 :2288673-2289072 | MVR | M36C05 | OK     | 651.818 | 123.658 | -2.39811               | 3.08679   | 0.00202  | 0.057876  |
| gene2208 | gene2208 | rplM      | gi 57650036 ref NC_002951.2 :2289085-2289523 | MVR | M36C05 | OK     | 178.136 | 35.2143 | -2.33875               | 3.28776   | 0.00101  | 0.0348021 |
| gene2209 | gene2209 | truA      | gi 57650036 ref NC_002951.2 :2289762-2290566 | MVR | M36C05 | OK     | 18.6502 | 17.8983 | -0.0593675             | 0.087161  | 0.93054  | 0.999883  |
| gene221  | gene221  | SACOL0230 | gi 57650036 ref NC_002951.2 :269258-269537   | MVR | M36C05 | OK     | 4.52567 | 1.21621 | -1.89574               | 1.19728   | 0.2312   | 0.901012  |
| gene2210 | gene2210 | SACOL2209 | gi 57650036 ref NC_002951.2 :2290570-2293033 | MVR | M36C05 | OK     | 24.6722 | 28.5319 | 0.209692               | -0.15649  | 0.87565  | 0.999883  |
| gene2211 | gene2211 | cbiO      | gi 57650036 ref NC_002951.2 :2290570-2293033 | MVR | M36C05 | OK     | 20.7456 | 28.5341 | 0.459878               | -0.344008 | 0.73084  | 0.999883  |
| gene2212 | gene2212 | cbiO      | gi 57650036 ref NC_002951.2 :2290570-2293033 | MVR | M36C05 | OK     | 24.2466 | 34.359  | 0.502907               | -0.393314 | 0.69409  | 0.999883  |
| gene2213 | gene2213 | rplQ      | gi 57650036 ref NC_002951.2 :2293570-2293939 | MVR | M36C05 | OK     | 159.832 | 156.793 | -0.0276897             | 0.038957  | 0.96892  | 0.999883  |
| gene2214 | gene2214 | rpoA      | gi 57650036 ref NC_002951.2 :2293955-2294900 | MVR | M36C05 | OK     | 214.035 | 201.617 | -0.0862285             | 0.099616  | 0.92065  | 0.999883  |
| gene2215 | gene2215 | rpsK      | gi 57650036 ref NC_002951.2 :2294974-2295364 | MVR | M36C05 | OK     | 196.129 | 193.95  | -0.0161179             | 0.021949  | 0.98249  | 0.999883  |
| gene2216 | gene2216 | rpsM      | gi 57650036 ref NC_002951.2 :2295387-2295753 | MVR | M36C05 | OK     | 141.015 | 141.079 | 0.0006576              | -0.000936 | 0.99925  | 0.999883  |
| gene2217 | gene2217 | rpmJ      | gi 57650036 ref NC_002951.2 :2295775-2295889 | MVR | M36C05 | OK     | 804.75  | 910.472 | 0.178073               | -0.144089 | 0.88543  | 0.999883  |
| gene2218 | gene2218 | infA      | gi 57650036 ref NC_002951.2 :2295920-2296139 | MVR | M36C05 | OK     | 176.863 | 220.119 | 0.315651               | -0.463206 | 0.64322  | 0.999883  |
| gene2219 | gene2219 | adk       | gi 57650036 ref NC_002951.2 :2296331-2296979 | MVR | M36C05 | OK     | 182.547 | 143.378 | -0.348441              | 0.44074   | 0.6594   | 0.999883  |
| gene222  | gene222  | SACOL0231 | gi 57650036 ref NC_002951.2 :269601-269736   | MVR | M36C05 | OK     | 25.1679 | 0       | -1.79769e+3(-1.79769e+ | 0.22252   | 0.89416  |           |
| gene2220 | gene2220 | secY      | gi 57650036 ref NC_002951.2 :2296995-2298728 | MVR | M36C05 | OK     | 285.524 | 251.65  | -0.182197              | 0.165687  | 0.8684   | 0.999883  |
| gene2221 | gene2221 | rplO      | gi 57650036 ref NC_002951.2 :2296995-2298728 | MVR | M36C05 | OK     | 390.838 | 379.845 | -0.0411605             | 0.020978  | 0.98326  | 0.999883  |
| gene2222 | gene2222 | rpmD      | gi 57650036 ref NC_002951.2 :2298744-2298924 | MVR | M36C05 | OK     | 474.577 | 279.463 | -0.763982              | 1.11658   | 0.26418  | 0.945724  |

|          |          |           |                                              |     |        |        |         |         |           |           |         |          |
|----------|----------|-----------|----------------------------------------------|-----|--------|--------|---------|---------|-----------|-----------|---------|----------|
| gene2223 | gene2223 | rpsE      | gi 57650036 ref NC_002951.2 :2298940-2299441 | MVR | M36C05 | OK     | 197.557 | 101.984 | -0.953934 | 1.27782   | 0.20131 | 0.870048 |
| gene2224 | gene2224 | rplR      | gi 57650036 ref NC_002951.2 :2299461-2299821 | MVR | M36C05 | OK     | 373.733 | 244.485 | -0.612261 | 0.810816  | 0.41747 | 0.999883 |
| gene2225 | gene2225 | rplF      | gi 57650036 ref NC_002951.2 :2299851-2300388 | MVR | M36C05 | OK     | 265.519 | 122.214 | -1.11941  | 1.44078   | 0.14965 | 0.751551 |
| gene2226 | gene2226 | rpsH      | gi 57650036 ref NC_002951.2 :2300412-2300811 | MVR | M36C05 | OK     | 165.905 | 77.8385 | -1.09181  | 1.54858   | 0.12148 | 0.692806 |
| gene2227 | gene2227 | rpsN      | gi 57650036 ref NC_002951.2 :2300842-2301028 | MVR | M36C05 | OK     | 71.2806 | 39.7175 | -0.843733 | 1.01145   | 0.3118  | 0.993813 |
| gene2228 | gene2228 | rplE      | gi 57650036 ref NC_002951.2 :2301050-2301590 | MVR | M36C05 | OK     | 187.049 | 81.8388 | -1.19256  | 1.59785   | 0.11008 | 0.659073 |
| gene2229 | gene2229 | rplX      | gi 57650036 ref NC_002951.2 :2301616-2301934 | MVR | M36C05 | OK     | 184.742 | 96.1547 | -0.942083 | 1.36595   | 0.17196 | 0.817635 |
| gene223  | gene223  | SACOL0232 | gi 57650036 ref NC_002951.2 :269763-271023   | MVR | M36C05 | OK     | 1.91933 | 1.35205 | -0.505448 | 0.656393  | 0.51157 | 0.999883 |
| gene2230 | gene2230 | rplN      | gi 57650036 ref NC_002951.2 :2301969-2302338 | MVR | M36C05 | OK     | 207.549 | 95.4956 | -1.11994  | 1.58218   | 0.11361 | 0.667905 |
| gene2231 | gene2231 | rpsQ      | gi 57650036 ref NC_002951.2 :2302369-2302633 | MVR | M36C05 | OK     | 252.31  | 106.772 | -1.24067  | 1.80994   | 0.07031 | 0.522414 |
| gene2232 | gene2232 | rpmC      | gi 57650036 ref NC_002951.2 :2302656-2303290 | MVR | M36C05 | OK     | 238.234 | 64.3363 | -1.88867  | 0.617309  | 0.53703 | 0.999883 |
| gene2233 | gene2233 | rplP      | gi 57650036 ref NC_002951.2 :2302656-2303290 | MVR | M36C05 | OK     | 365.001 | 193.304 | -0.917024 | 1.12773   | 0.25943 | 0.938894 |
| gene2234 | gene2234 | rpsC      | gi 57650036 ref NC_002951.2 :2303292-2303946 | MVR | M36C05 | OK     | 265.517 | 138.806 | -0.935738 | 1.15607   | 0.24765 | 0.922459 |
| gene2235 | gene2235 | rplV      | gi 57650036 ref NC_002951.2 :2303969-2304323 | MVR | M36C05 | OK     | 158.731 | 89.3542 | -0.828975 | 1.19505   | 0.23207 | 0.902162 |
| gene2236 | gene2236 | rpsS      | gi 57650036 ref NC_002951.2 :2304351-2304630 | MVR | M36C05 | OK     | 216.478 | 116.756 | -0.890718 | 1.29875   | 0.19403 | 0.85674  |
| gene2237 | gene2237 | rplB      | gi 57650036 ref NC_002951.2 :2304696-2305530 | MVR | M36C05 | OK     | 271.177 | 131.704 | -1.04193  | 1.2395    | 0.21516 | 0.89416  |
| gene2238 | gene2238 | rplW      | gi 57650036 ref NC_002951.2 :2305562-2306461 | MVR | M36C05 | OK     | 112.541 | 81.2578 | -0.469878 | 0.188772  | 0.85027 | 0.999883 |
| gene2239 | gene2239 | rplD      | gi 57650036 ref NC_002951.2 :2305562-2306461 | MVR | M36C05 | OK     | 225.781 | 111.94  | -1.01219  | 1.18276   | 0.2369  | 0.906613 |
| gene224  | gene224  | gutB      | gi 57650036 ref NC_002951.2 :271040-272096   | MVR | M36C05 | OK     | 3.72524 | 3.34919 | -0.15352  | 0.214404  | 0.83023 | 0.999883 |
| gene2240 | gene2240 | rplC      | gi 57650036 ref NC_002951.2 :2306487-2307150 | MVR | M36C05 | OK     | 215.334 | 106.069 | -1.02157  | 1.29334   | 0.1959  | 0.858688 |
| gene2241 | gene2241 | rpsJ      | gi 57650036 ref NC_002951.2 :2307177-2307486 | MVR | M36C05 | OK     | 147.671 | 115.057 | -0.360044 | 0.524995  | 0.59959 | 0.999883 |
| gene2242 | gene2242 | SACOL2241 | gi 57650036 ref NC_002951.2 :2307842-2308232 | MVR | M36C05 | OK     | 195.441 | 617.063 | 1.65868   | -2.10678  | 0.03514 | 0.35865  |
| gene2243 | gene2243 | SACOL2242 | gi 57650036 ref NC_002951.2 :2308423-2309758 | MVR | M36C05 | OK     | 146.974 | 39.142  | -1.90877  | 2.34334   | 0.01911 | 0.252566 |
| gene2244 | gene2244 | topB      | gi 57650036 ref NC_002951.2 :2309870-2312006 | MVR | M36C05 | OK     | 47.1714 | 30.3972 | -0.633977 | 0.797975  | 0.42489 | 0.999883 |
| gene2245 | gene2245 | SACOL2245 | gi 57650036 ref NC_002951.2 :2312192-2313080 | MVR | M36C05 | OK     | 26.155  | 26.451  | 0.0162403 | -0.023448 | 0.98129 | 0.999883 |
| gene2246 | gene2246 | SACOL2246 | gi 57650036 ref NC_002951.2 :2313260-2314124 | MVR | M36C05 | OK     | 54.1793 | 33.0561 | -0.712825 | 0.99313   | 0.32065 | 0.999883 |
| gene2247 | gene2247 | SACOL2247 | gi 57650036 ref NC_002951.2 :2314240-2314372 | MVR | M36C05 | OK     | 62.2758 | 53.0518 | -0.231271 | 0.120568  | 0.90403 | 0.999883 |
| gene2248 | gene2248 | SACOL2248 | gi 57650036 ref NC_002951.2 :2314542-2315451 | MVR | M36C05 | OK     | 17.4145 | 16.1778 | -0.106276 | 0.155792  | 0.8762  | 0.999883 |
| gene2249 | gene2249 | SACOL2250 | gi 57650036 ref NC_002951.2 :2315583-2315748 | MVR | M36C05 | OK     | 126.668 | 94.1888 | -0.427421 | 0.523442  | 0.60067 | 0.999883 |
| gene225  | gene225  | SACOL0234 | gi 57650036 ref NC_002951.2 :272097-272244   | MVR | M36C05 | NOTEST | 0       | 0       | 0         | 0         | 1       | 1        |
| gene2250 | gene2250 | SACOL2251 | gi 57650036 ref NC_002951.2 :2315992-2316310 | MVR | M36C05 | OK     | 68.6652 | 72.116  | 0.0707409 | -0.103958 | 0.9172  | 0.999883 |
| gene2251 | gene2251 | SACOL2252 | gi 57650036 ref NC_002951.2 :2316496-2319664 | MVR | M36C05 | OK     | 37.7702 | 33.3754 | -0.178464 | 0.215219  | 0.8296  | 0.999883 |
| gene2252 | gene2252 | femX      | gi 57650036 ref NC_002951.2 :2319780-2321046 | MVR | M36C05 | OK     | 40.0739 | 36.093  | -0.150943 | 0.202727  | 0.83935 | 0.999883 |

|          |          |           |                                              |     |        |        |         |         |              |              |         |          |
|----------|----------|-----------|----------------------------------------------|-----|--------|--------|---------|---------|--------------|--------------|---------|----------|
| gene2253 | gene2253 | SACOL2255 | gi 57650036 ref NC_002951.2 :2321677-2322442 | MVR | M36C05 | OK     | 11.456  | 15.0352 | 0.392235     | -0.575218    | 0.56514 | 0.999883 |
| gene2254 | gene2254 | SACOL2256 | gi 57650036 ref NC_002951.2 :2322603-2324248 | MVR | M36C05 | OK     | 2.14011 | 1.37293 | -0.640425    | 0.331391     | 0.74035 | 0.999883 |
| gene2255 | gene2255 | SACOL2257 | gi 57650036 ref NC_002951.2 :2322603-2324248 | MVR | M36C05 | OK     | 1.89416 | 2.39671 | 0.339495     | -0.42554     | 0.67044 | 0.999883 |
| gene2256 | gene2256 | sarV      | gi 57650036 ref NC_002951.2 :2324349-2324700 | MVR | M36C05 | OK     | 4.77187 | 7.88047 | 0.723728     | -0.825333    | 0.40918 | 0.999883 |
| gene2257 | gene2257 | SACOL2259 | gi 57650036 ref NC_002951.2 :2324825-2324996 | MVR | M36C05 | NOTEST | 0       | 0       | 0            | 0            | 1       | 1        |
| gene2258 | gene2258 | SACOL2260 | gi 57650036 ref NC_002951.2 :2325052-2325196 | MVR | M36C05 | OK     | 0       | 24.9484 | 1.79769e+30  | 1.79769e+30  | 0.14732 | 0.743774 |
| gene2259 | gene2259 | moaA      | gi 57650036 ref NC_002951.2 :2325390-2326413 | MVR | M36C05 | OK     | 53.6479 | 44.2153 | -0.278978    | 0.375271     | 0.70746 | 0.999883 |
| gene226  | gene226  | SACOL0235 | gi 57650036 ref NC_002951.2 :272267-273311   | MVR | M36C05 | OK     | 4.84948 | 3.65816 | -0.406711    | 0.575767     | 0.56477 | 0.999883 |
| gene2260 | gene2260 | mobA      | gi 57650036 ref NC_002951.2 :2326432-2327032 | MVR | M36C05 | OK     | 41.9706 | 28.1497 | -0.576263    | 0.840969     | 0.40037 | 0.999883 |
| gene2261 | gene2261 | moaD      | gi 57650036 ref NC_002951.2 :2327038-2327272 | MVR | M36C05 | OK     | 28.9618 | 32.0026 | 0.144039     | -0.184469    | 0.85365 | 0.999883 |
| gene2262 | gene2262 | moaE      | gi 57650036 ref NC_002951.2 :2327277-2327724 | MVR | M36C05 | OK     | 32.8278 | 44.6641 | 0.444199     | -0.652131    | 0.51432 | 0.999883 |
| gene2263 | gene2263 | mobB      | gi 57650036 ref NC_002951.2 :2327737-2329479 | MVR | M36C05 | OK     | 33.5995 | 32.4288 | -0.0511649   | 0.034794     | 0.97224 | 0.999883 |
| gene2264 | gene2264 | SACOL2266 | gi 57650036 ref NC_002951.2 :2327737-2329479 | MVR | M36C05 | OK     | 27.4915 | 24.025  | -0.194454    | 0.228459     | 0.81929 | 0.999883 |
| gene2265 | gene2265 | moaC      | gi 57650036 ref NC_002951.2 :2329541-2330036 | MVR | M36C05 | OK     | 105.674 | 129.134 | 0.289245     | -0.396305    | 0.69188 | 0.999883 |
| gene2266 | gene2266 | moaB      | gi 57650036 ref NC_002951.2 :2330037-2330544 | MVR | M36C05 | OK     | 26.8057 | 20.5018 | -0.386788    | 0.567087     | 0.57066 | 0.999883 |
| gene2267 | gene2267 | SACOL2269 | gi 57650036 ref NC_002951.2 :2330574-2331579 | MVR | M36C05 | OK     | 26.2065 | 25.8901 | -0.017524    | 0.025078     | 0.97999 | 0.999883 |
| gene2268 | gene2268 | modC      | gi 57650036 ref NC_002951.2 :2331748-2332354 | MVR | M36C05 | OK     | 50.0344 | 56.5533 | 0.176692     | -0.252471    | 0.80068 | 0.999883 |
| gene2269 | gene2269 | modB      | gi 57650036 ref NC_002951.2 :2332354-2333026 | MVR | M36C05 | OK     | 45.9346 | 55.8794 | 0.282735     | -0.400539    | 0.68876 | 0.999883 |
| gene227  | gene227  | ispD      | gi 57650036 ref NC_002951.2 :273838-275573   | MVR | M36C05 | OK     | 32.3757 | 37.562  | 0.214364     | -0.175087    | 0.86101 | 0.999883 |
| gene2270 | gene2270 | modA      | gi 57650036 ref NC_002951.2 :2333039-2333822 | MVR | M36C05 | OK     | 99.2628 | 106.155 | 0.0968446    | -0.125113    | 0.90043 | 0.999883 |
| gene2271 | gene2271 | fdhD      | gi 57650036 ref NC_002951.2 :2334111-2334909 | MVR | M36C05 | OK     | 155.752 | 256.415 | 0.719229     | -0.856073    | 0.39196 | 0.999883 |
| gene2272 | gene2272 | SACOL2274 | gi 57650036 ref NC_002951.2 :2335080-2335851 | MVR | M36C05 | OK     | 5.55832 | 2.8981  | -0.939539    | 1.264        | 0.20623 | 0.87934  |
| gene2273 | gene2273 | SACOL2275 | gi 57650036 ref NC_002951.2 :2335922-2336477 | MVR | M36C05 | OK     | 4.94203 | 4.35428 | -0.182669    | 0.235469     | 0.81385 | 0.999883 |
| gene2274 | gene2274 | SACOL2276 | gi 57650036 ref NC_002951.2 :2336597-2337539 | MVR | M36C05 | OK     | 6.27112 | 2.08081 | -1.59158     | 2.15731      | 0.03098 | 0.336223 |
| gene2275 | gene2275 | SACOL2277 | gi 57650036 ref NC_002951.2 :2337937-2338846 | MVR | M36C05 | OK     | 56.341  | 14.4666 | -1.96145     | 2.75565      | 0.00586 | 0.119078 |
| gene2276 | gene2276 | SACOL2278 | gi 57650036 ref NC_002951.2 :2339059-2340214 | MVR | M36C05 | OK     | 39.6366 | 41.4464 | 0.0644114    | -0.086943    | 0.93072 | 0.999883 |
| gene2277 | gene2277 | SACOL2279 | gi 57650036 ref NC_002951.2 :2340430-2341336 | MVR | M36C05 | OK     | 6.3448  | 4.5303  | -0.485968    | 0.690977     | 0.48958 | 0.999883 |
| gene2278 | gene2278 | ureA      | gi 57650036 ref NC_002951.2 :2341595-2341898 | MVR | M36C05 | NOTEST | 0.61218 | 0       | -1.79769e+30 | -1.79769e+30 | 0.22252 | 1        |
| gene2279 | gene2279 | ureB      | gi 57650036 ref NC_002951.2 :2341911-2344034 | MVR | M36C05 | OK     | 2.77445 | 3.65056 | 0.395914     | -0.191854    | 0.84786 | 0.999883 |
| gene228  | gene228  | SACOL0237 | gi 57650036 ref NC_002951.2 :273838-275573   | MVR | M36C05 | OK     | 36.0934 | 33.9086 | -0.0900811   | 0.093626     | 0.92541 | 0.999883 |
| gene2280 | gene2280 | ureC      | gi 57650036 ref NC_002951.2 :2341911-2344034 | MVR | M36C05 | OK     | 3.41048 | 3.12622 | -0.125555    | 0.17171      | 0.86367 | 0.999883 |
| gene2281 | gene2281 | ureE      | gi 57650036 ref NC_002951.2 :2344046-2345181 | MVR | M36C05 | OK     | 4.82406 | 5.66983 | 0.233057     | -0.217844    | 0.82755 | 0.999883 |
| gene2282 | gene2282 | ureF      | gi 57650036 ref NC_002951.2 :2344046-2345181 | MVR | M36C05 | OK     | 2.7601  | 3.37802 | 0.291456     | -0.294245    | 0.76857 | 0.999883 |



|          |          |           |                                              |     |        |    |         |         |                               |           |          |           |
|----------|----------|-----------|----------------------------------------------|-----|--------|----|---------|---------|-------------------------------|-----------|----------|-----------|
| gene2283 | gene2283 | ureG      | gi 57650036 ref NC_002951.2 :2345193-2346644 | MVR | M36C05 | OK | 9.86666 | 6.91557 | -0.512715                     | 0.496898  | 0.61926  | 0.999883  |
| gene2284 | gene2284 | ureD      | gi 57650036 ref NC_002951.2 :2345193-2346644 | MVR | M36C05 | OK | 8.2033  | 5.71433 | -0.52162                      | 0.573599  | 0.56624  | 0.999883  |
| gene2285 | gene2285 | sarR      | gi 57650036 ref NC_002951.2 :2346832-2347180 | MVR | M36C05 | OK | 39.3669 | 78.8037 | 1.00128                       | -1.46091  | 0.14404  | 0.743774  |
| gene2286 | gene2286 | SACOL2288 | gi 57650036 ref NC_002951.2 :2347607-2347934 | MVR | M36C05 | OK | 137.301 | 235.791 | 0.780172                      | -1.10342  | 0.26985  | 0.953548  |
| gene2287 | gene2287 | sarY      | gi 57650036 ref NC_002951.2 :2347997-2348741 | MVR | M36C05 | OK | 3.48557 | 9.32932 | 1.42038                       | -1.95758  | 0.05028  | 0.441055  |
| gene2288 | gene2288 | SACOL2290 | gi 57650036 ref NC_002951.2 :2348766-2350722 | MVR | M36C05 | OK | 3.41075 | 11.8619 | 1.79817                       | -2.59839  | 0.00937  | 0.161634  |
| gene2289 | gene2289 | SACOL2291 | gi 57650036 ref NC_002951.2 :2351331-2352135 | MVR | M36C05 | OK | 255.457 | 74.3328 | -1.78101                      | 2.19874   | 0.0279   | 0.315942  |
| gene229  | gene229  | SACOL0238 | gi 57650036 ref NC_002951.2 :275594-277289   | MVR | M36C05 | OK | 36.4206 | 27.573  | -0.401496                     | 0.530548  | 0.59573  | 0.999883  |
| gene2290 | gene2290 | nhaC      | gi 57650036 ref NC_002951.2 :2352567-2353968 | MVR | M36C05 | OK | 6.01247 | 19.7338 | 1.71464                       | -2.47076  | 0.01348  | 0.200357  |
| gene2291 | gene2291 | SACOL2293 | gi 57650036 ref NC_002951.2 :2354062-2355145 | MVR | M36C05 | OK | 6.73982 | 35.214  | 2.38537                       | -3.38171  | 0.00072  | 0.0270119 |
| gene2292 | gene2292 | SACOL2294 | gi 57650036 ref NC_002951.2 :2355392-2355815 | MVR | M36C05 | OK | 82.847  | 39.5223 | -1.06778                      | 1.5582    | 0.11919  | 0.6862    |
| gene2293 | gene2293 | SACOL2295 | gi 57650036 ref NC_002951.2 :2356051-2356552 | MVR | M36C05 | OK | 1361.21 | 1354.77 | -0.0068413                    | 0.007202  | 0.99425  | 0.999883  |
| gene2294 | gene2294 | SACOL2296 | gi 57650036 ref NC_002951.2 :2356913-2357867 | MVR | M36C05 | OK | 190.329 | 219.099 | 0.203085                      | -0.234751 | 0.8144   | 0.999883  |
| gene2295 | gene2295 | SACOL2297 | gi 57650036 ref NC_002951.2 :2357958-2359083 | MVR | M36C05 | OK | 25.0539 | 8.5822  | -1.54561                      | 2.23352   | 0.02551  | 0.303701  |
| gene2296 | gene2296 | SACOL2298 | gi 57650036 ref NC_002951.2 :2359393-2360170 | MVR | M36C05 | OK | 31.8252 | 12.2365 | -1.37898                      | 2.0075    | 0.0447   | 0.413637  |
| gene2297 | gene2297 | SACOL2299 | gi 57650036 ref NC_002951.2 :2360191-2360443 | MVR | M36C05 | OK | 24.0272 | 14.3884 | -0.739766                     | 0.902244  | 0.36693  | 0.999883  |
| gene2298 | gene2298 | SACOL2300 | gi 57650036 ref NC_002951.2 :2360652-2364080 | MVR | M36C05 | OK | 453.907 | 1322.73 | 1.54305                       | -0.657001 | 0.51118  | 0.999883  |
| gene2299 | gene2299 | SACOL2301 | gi 57650036 ref NC_002951.2 :2360652-2364080 | MVR | M36C05 | OK | 199.209 | 677.855 | 1.76669                       | -1.67555  | 0.09383  | 0.615061  |
| gene23   | gene23   | yycI      | gi 57650036 ref NC_002951.2 :28819-29608     | MVR | M36C05 | OK | 98.8301 | 74.7302 | -0.403258                     | 0.529966  | 0.59614  | 0.999883  |
| gene230  | gene230  | SACOL0239 | gi 57650036 ref NC_002951.2 :277716-278886   | MVR | M36C05 | OK | 31.9609 | 23.9828 | -0.414306                     | 0.580194  | 0.56178  | 0.999883  |
| gene2300 | gene2300 | SACOL2302 | gi 57650036 ref NC_002951.2 :2364681-2365635 | MVR | M36C05 | OK | 26.1142 | 33.64   | 0.365345                      | -0.519763 | 0.60323  | 0.999883  |
| gene2301 | gene2301 | SACOL2303 | gi 57650036 ref NC_002951.2 :2365761-2366559 | MVR | M36C05 | OK | 40.3386 | 41.3215 | 0.0347311                     | -0.049132 | 0.96082  | 0.999883  |
| gene2302 | gene2302 | SACOL2304 | gi 57650036 ref NC_002951.2 :2366943-2367636 | MVR | M36C05 | OK | 52.2314 | 69.163  | 0.405084                      | -0.562445 | 0.57381  | 0.999883  |
| gene2303 | gene2303 | SACOL2305 | gi 57650036 ref NC_002951.2 :2367991-2369020 | MVR | M36C05 | OK | 3.90157 | 0.90974 | -2.10053                      | 0.426771  | 0.66955  | 0.999883  |
| gene2304 | gene2304 | SACOL2306 | gi 57650036 ref NC_002951.2 :2367991-2369020 | MVR | M36C05 | OK | 16.9487 | 16.4061 | -0.0469386                    | 0.067996  | 0.94579  | 0.999883  |
| gene2305 | gene2305 | SACOL2307 | gi 57650036 ref NC_002951.2 :2369068-2369398 | MVR | M36C05 | OK | 1.49907 | 0       | -1.79769e+3(-1.79769e+0.09295 |           | 0.611738 |           |
| gene2306 | gene2306 | SACOL2308 | gi 57650036 ref NC_002951.2 :2369842-2370715 | MVR | M36C05 | OK | 90.729  | 71.4547 | -0.344535                     | 0.449538  | 0.65304  | 0.999883  |
| gene2307 | gene2307 | SACOL2309 | gi 57650036 ref NC_002951.2 :2371101-2372481 | MVR | M36C05 | OK | 166.651 | 104.256 | -0.676692                     | 0.780955  | 0.43483  | 0.999883  |
| gene2308 | gene2308 | SACOL2310 | gi 57650036 ref NC_002951.2 :2372760-2373299 | MVR | M36C05 | OK | 70.566  | 62.8951 | -0.166026                     | 0.185845  | 0.85257  | 0.999883  |
| gene2309 | gene2309 | SACOL2311 | gi 57650036 ref NC_002951.2 :2372760-2373299 | MVR | M36C05 | OK | 365.7   | 292.917 | -0.320171                     | 0.293969  | 0.76878  | 0.999883  |
| gene231  | gene231  | ispD      | gi 57650036 ref NC_002951.2 :279161-280896   | MVR | M36C05 | OK | 39.4912 | 35.8547 | -0.139371                     | 0.079408  | 0.93671  | 0.999883  |
| gene2310 | gene2310 | SACOL2312 | gi 57650036 ref NC_002951.2 :2373394-2373586 | MVR | M36C05 | OK | 91.2101 | 85.6045 | -0.0915072                    | 0.122763  | 0.90229  | 0.999883  |
| gene2311 | gene2311 | SACOL2313 | gi 57650036 ref NC_002951.2 :2373596-2374232 | MVR | M36C05 | OK | 16.6007 | 19.7455 | 0.250284                      | -0.367541 | 0.71322  | 0.999883  |

|          |          |           |                                              |     |        |        |         |         |           |           |          |           |
|----------|----------|-----------|----------------------------------------------|-----|--------|--------|---------|---------|-----------|-----------|----------|-----------|
| gene2312 | gene2312 | SACOL2314 | gi 57650036 ref NC_002951.2 :2374306-2375224 | MVR | M36C05 | OK     | 7.24623 | 9.5234  | 0.394245  | -0.574949 | 0.56533  | 0.999883  |
| gene2313 | gene2313 | SACOL2315 | gi 57650036 ref NC_002951.2 :2375491-2376022 | MVR | M36C05 | OK     | 11.603  | 3.00235 | -1.95033  | 2.50336   | 0.0123   | 0.189861  |
| gene2314 | gene2314 | SACOL2316 | gi 57650036 ref NC_002951.2 :2376087-2377692 | MVR | M36C05 | OK     | 10.376  | 21.1031 | 1.0242    | -1.45477  | 0.14573  | 0.743774  |
| gene2315 | gene2315 | SACOL2317 | gi 57650036 ref NC_002951.2 :2378021-2378786 | MVR | M36C05 | OK     | 14.8064 | 12.3015 | -0.267384 | 0.392635  | 0.69459  | 0.999883  |
| gene2316 | gene2316 | SACOL2318 | gi 57650036 ref NC_002951.2 :2378843-2379350 | MVR | M36C05 | OK     | 121.656 | 206.457 | 0.763026  | -1.00779  | 0.31355  | 0.995692  |
| gene2317 | gene2317 | SACOL2319 | gi 57650036 ref NC_002951.2 :2379516-2380830 | MVR | M36C05 | OK     | 9.97981 | 6.92712 | -0.526757 | 0.773659  | 0.43913  | 0.999883  |
| gene2318 | gene2318 | SACOL2320 | gi 57650036 ref NC_002951.2 :2381054-2381624 | MVR | M36C05 | OK     | 9.62628 | 19.9923 | 1.0544    | -1.51724  | 0.12921  | 0.7118    |
| gene2319 | gene2319 | SACOL2321 | gi 57650036 ref NC_002951.2 :2382110-2382992 | MVR | M36C05 | OK     | 49.3209 | 437.295 | 3.14834   | -3.77824  | 0.00016  | 0.0084046 |
| gene232  | gene232  | SACOL0241 | gi 57650036 ref NC_002951.2 :279161-280896   | MVR | M36C05 | OK     | 90.7803 | 80.6331 | -0.171006 | 0.186588  | 0.85198  | 0.999883  |
| gene2320 | gene2320 | SACOL2322 | gi 57650036 ref NC_002951.2 :2383102-2384224 | MVR | M36C05 | OK     | 18.8206 | 25.3521 | 0.429793  | -0.615542 | 0.5382   | 0.999883  |
| gene2321 | gene2321 | hutI      | gi 57650036 ref NC_002951.2 :2384500-2387400 | MVR | M36C05 | OK     | 19.6479 | 32.8935 | 0.743427  | -0.724611 | 0.46869  | 0.999883  |
| gene2322 | gene2322 | hutU      | gi 57650036 ref NC_002951.2 :2384500-2387400 | MVR | M36C05 | OK     | 12.6899 | 17.5658 | 0.469091  | -0.415335 | 0.6779   | 0.999883  |
| gene2323 | gene2323 | SACOL2325 | gi 57650036 ref NC_002951.2 :2387559-2388444 | MVR | M36C05 | OK     | 37.3315 | 28.6602 | -0.381346 | 0.542723  | 0.58732  | 0.999883  |
| gene2324 | gene2324 | fosB      | gi 57650036 ref NC_002951.2 :2388865-2389285 | MVR | M36C05 | OK     | 37.4541 | 13.5172 | -1.47033  | 2.10437   | 0.03535  | 0.359272  |
| gene2325 | gene2325 | hutG      | gi 57650036 ref NC_002951.2 :2389540-2390476 | MVR | M36C05 | OK     | 28.3346 | 334.448 | 3.56114   | -4.39372  | 1.11E-05 | 0.0008765 |
| gene2326 | gene2326 | SACOL2328 | gi 57650036 ref NC_002951.2 :2390765-2392025 | MVR | M36C05 | OK     | 179.288 | 162.559 | -0.141318 | 0.160466  | 0.87251  | 0.999883  |
| gene2327 | gene2327 | rpiA      | gi 57650036 ref NC_002951.2 :2392090-2392777 | MVR | M36C05 | OK     | 32.3255 | 21.073  | -0.61728  | 0.902455  | 0.36682  | 0.999883  |
| gene2328 | gene2328 | SACOL2330 | gi 57650036 ref NC_002951.2 :2392950-2393604 | MVR | M36C05 | OK     | 36.1636 | 51.2925 | 0.504208  | -0.723557 | 0.46934  | 0.999883  |
| gene2329 | gene2329 | SACOL2331 | gi 57650036 ref NC_002951.2 :2393733-2394859 | MVR | M36C05 | NOTEST | 0       | 0       | 0         | 0         | 1        | 1         |
| gene233  | gene233  | SACOL0242 | gi 57650036 ref NC_002951.2 :280917-282606   | MVR | M36C05 | OK     | 68.9076 | 66.7678 | -0.04551  | 0.055195  | 0.95598  | 0.999883  |
| gene2330 | gene2330 | galM      | gi 57650036 ref NC_002951.2 :2393733-2394859 | MVR | M36C05 | OK     | 7.05267 | 4.97563 | -0.503291 | 0.721762  | 0.47044  | 0.999883  |
| gene2331 | gene2331 | SACOL2333 | gi 57650036 ref NC_002951.2 :2394888-2395215 | MVR | M36C05 | OK     | 14.8019 | 8.3614  | -0.82397  | 1.03148   | 0.30232  | 0.987655  |
| gene2332 | gene2332 | SACOL2334 | gi 57650036 ref NC_002951.2 :2395432-2397557 | MVR | M36C05 | OK     | 24.7493 | 27.7485 | 0.165018  | -0.187535 | 0.85124  | 0.999883  |
| gene2333 | gene2333 | SACOL2335 | gi 57650036 ref NC_002951.2 :2395432-2397557 | MVR | M36C05 | OK     | 17.3867 | 14.6529 | -0.246804 | 0.179241  | 0.85775  | 0.999883  |
| gene2334 | gene2334 | SACOL2336 | gi 57650036 ref NC_002951.2 :2397626-2397725 | MVR | M36C05 | NOTEST | 0       | 0       | 0         | 0         | 1        | 1         |
| gene2335 | gene2335 | SACOL2338 | gi 57650036 ref NC_002951.2 :2397787-2398435 | MVR | M36C05 | OK     | 33.5037 | 35.9677 | 0.102383  | -0.148874 | 0.88165  | 0.999883  |
| gene2336 | gene2336 | SACOL2339 | gi 57650036 ref NC_002951.2 :2398833-2399442 | MVR | M36C05 | OK     | 6.6801  | 4.85807 | -0.459485 | 0.621864  | 0.53403  | 0.999883  |
| gene2337 | gene2337 | gltS      | gi 57650036 ref NC_002951.2 :2399778-2400987 | MVR | M36C05 | OK     | 25.7678 | 7.53932 | -1.77306  | 2.5482    | 0.01083  | 0.175699  |
| gene2338 | gene2338 | fni       | gi 57650036 ref NC_002951.2 :2401034-2402084 | MVR | M36C05 | OK     | 50.125  | 31.3935 | -0.675062 | 0.923856  | 0.35556  | 0.999883  |
| gene2339 | gene2339 | SACOL2342 | gi 57650036 ref NC_002951.2 :2402114-2403062 | MVR | M36C05 | OK     | 16.1537 | 17.6923 | 0.131254  | -0.192096 | 0.84767  | 0.999883  |
| gene234  | gene234  | SACOL0243 | gi 57650036 ref NC_002951.2 :282641-284363   | MVR | M36C05 | OK     | 139.543 | 95.9513 | -0.540336 | 0.615121  | 0.53848  | 0.999883  |
| gene2340 | gene2340 | SACOL2343 | gi 57650036 ref NC_002951.2 :2403158-2404066 | MVR | M36C05 | OK     | 69.1971 | 116.468 | 0.751146  | -0.762055 | 0.44603  | 0.999883  |
| gene2341 | gene2341 | SACOL2344 | gi 57650036 ref NC_002951.2 :2403158-2404066 | MVR | M36C05 | OK     | 56.0337 | 128.163 | 1.19361   | -1.02171  | 0.30692  | 0.991033  |

|          |          |           |                                              |     |        |        |         |         |            |           |         |           |
|----------|----------|-----------|----------------------------------------------|-----|--------|--------|---------|---------|------------|-----------|---------|-----------|
| gene2342 | gene2342 | SACOL2345 | gi 57650036 ref NC_002951.2 :2404173-2405076 | MVR | M36C05 | OK     | 41.7678 | 24.6309 | -0.761922  | 1.0806    | 0.27988 | 0.965951  |
| gene2343 | gene2343 | SACOL2346 | gi 57650036 ref NC_002951.2 :2405301-2405940 | MVR | M36C05 | OK     | 27.3272 | 29.6669 | 0.118518   | -0.173557 | 0.86221 | 0.999883  |
| gene2344 | gene2344 | SACOL2347 | gi 57650036 ref NC_002951.2 :2406185-2408117 | MVR | M36C05 | OK     | 5.47908 | 2.54526 | -1.10612   | 1.60939   | 0.10753 | 0.653986  |
| gene2345 | gene2345 | SACOL2348 | gi 57650036 ref NC_002951.2 :2408129-2408777 | MVR | M36C05 | OK     | 4.96351 | 1.47813 | -1.74759   | 2.0747    | 0.03801 | 0.378414  |
| gene2346 | gene2346 | SACOL2349 | gi 57650036 ref NC_002951.2 :2408897-2409449 | MVR | M36C05 | OK     | 44.7049 | 48.3058 | 0.111764   | -0.162223 | 0.87113 | 0.999883  |
| gene2347 | gene2347 | tcaB      | gi 57650036 ref NC_002951.2 :2409678-2410887 | MVR | M36C05 | OK     | 11.3402 | 11.3636 | 0.00297463 | -0.004364 | 0.99652 | 0.999883  |
| gene2348 | gene2348 | SACOL2351 | gi 57650036 ref NC_002951.2 :2410996-2411125 | MVR | M36C05 | NOTEST | 0       | 0       | 0          | 0         | 1       | 1         |
| gene2349 | gene2349 | tcaA      | gi 57650036 ref NC_002951.2 :2411155-2412538 | MVR | M36C05 | OK     | 9.53719 | 6.24324 | -0.61127   | 0.897388  | 0.36951 | 0.999883  |
| gene235  | gene235  | scdA      | gi 57650036 ref NC_002951.2 :284502-285177   | MVR | M36C05 | OK     | 57.2959 | 65.7482 | 0.198519   | -0.276286 | 0.78233 | 0.999883  |
| gene2350 | gene2350 | tcaR      | gi 57650036 ref NC_002951.2 :2412777-2413233 | MVR | M36C05 | OK     | 42.3677 | 37.934  | -0.159473  | 0.234418  | 0.81466 | 0.999883  |
| gene2351 | gene2351 | SACOL2354 | gi 57650036 ref NC_002951.2 :2413427-2414396 | MVR | M36C05 | OK     | 11.0675 | 28.3942 | 1.35927    | -1.96728  | 0.04915 | 0.435378  |
| gene2352 | gene2352 | SACOL2355 | gi 57650036 ref NC_002951.2 :2414970-2415327 | MVR | M36C05 | OK     | 0.8351  | 1.38231 | 0.727058   | -0.439887 | 0.66002 | 0.999883  |
| gene2353 | gene2353 | SACOL2356 | gi 57650036 ref NC_002951.2 :2415466-2417187 | MVR | M36C05 | OK     | 3.43892 | 6.63099 | 0.94727    | -0.832079 | 0.40537 | 0.999883  |
| gene2354 | gene2354 | SACOL2357 | gi 57650036 ref NC_002951.2 :2415466-2417187 | MVR | M36C05 | OK     | 2.88179 | 6.69839 | 1.21685    | -1.39909  | 0.16179 | 0.786331  |
| gene2355 | gene2355 | SACOL2358 | gi 57650036 ref NC_002951.2 :2417322-2419363 | MVR | M36C05 | OK     | 9.4629  | 10.4547 | 0.143792   | -0.077697 | 0.93807 | 0.999883  |
| gene2356 | gene2356 | SACOL2359 | gi 57650036 ref NC_002951.2 :2417322-2419363 | MVR | M36C05 | OK     | 24.5635 | 18.9673 | -0.373003  | 0.474401  | 0.63521 | 0.999883  |
| gene2357 | gene2357 | SACOL2360 | gi 57650036 ref NC_002951.2 :2419525-2420421 | MVR | M36C05 | OK     | 10.2953 | 19.8914 | 0.950159   | -1.03881  | 0.29889 | 0.981436  |
| gene2358 | gene2358 | SACOL2361 | gi 57650036 ref NC_002951.2 :2419525-2420421 | MVR | M36C05 | OK     | 10.5293 | 8.62137 | -0.288415  | 0.262456  | 0.79297 | 0.999883  |
| gene2359 | gene2359 | mqs1      | gi 57650036 ref NC_002951.2 :2420486-2421965 | MVR | M36C05 | OK     | 183.939 | 139.79  | -0.395963  | 0.443767  | 0.65721 | 0.999883  |
| gene236  | gene236  | lytS      | gi 57650036 ref NC_002951.2 :285423-287178   | MVR | M36C05 | OK     | 11.8046 | 10.49   | -0.170331  | 0.246321  | 0.80543 | 0.999883  |
| gene2360 | gene2360 | SACOL2363 | gi 57650036 ref NC_002951.2 :2422345-2423944 | MVR | M36C05 | OK     | 25.0536 | 33.5632 | 0.421859   | -0.566412 | 0.57111 | 0.999883  |
| gene2361 | gene2361 | SACOL2364 | gi 57650036 ref NC_002951.2 :2424260-2425934 | MVR | M36C05 | OK     | 15.9731 | 15.7029 | -0.0246173 | 0.034922  | 0.97214 | 0.999883  |
| gene2362 | gene2362 | SACOL2365 | gi 57650036 ref NC_002951.2 :2426086-2426716 | MVR | M36C05 | OK     | 67.5267 | 475.898 | 2.81712    | -3.48144  | 0.0005  | 0.0200515 |
| gene2363 | gene2363 | SACOL2366 | gi 57650036 ref NC_002951.2 :2427029-2427545 | MVR | M36C05 | OK     | 13.1936 | 10.1337 | -0.380677  | 0.539238  | 0.58972 | 0.999883  |
| gene2364 | gene2364 | SACOL2367 | gi 57650036 ref NC_002951.2 :2427735-2428740 | MVR | M36C05 | OK     | 28.6026 | 25.4792 | -0.166825  | 0.238097  | 0.81181 | 0.999883  |
| gene2365 | gene2365 | SACOL2368 | gi 57650036 ref NC_002951.2 :2428785-2429187 | MVR | M36C05 | OK     | 7.42372 | 14.6908 | 0.984695   | -1.29893  | 0.19397 | 0.85674   |
| gene2366 | gene2366 | SACOL2369 | gi 57650036 ref NC_002951.2 :2429222-2430257 | MVR | M36C05 | OK     | 14.3493 | 17.0355 | 0.247565   | -0.361907 | 0.71742 | 0.999883  |
| gene2367 | gene2367 | SACOL2371 | gi 57650036 ref NC_002951.2 :2430488-2430920 | MVR | M36C05 | OK     | 58.7971 | 29.4605 | -0.996964  | 1.46075   | 0.14408 | 0.743774  |
| gene2368 | gene2368 | SACOL2372 | gi 57650036 ref NC_002951.2 :2430971-2431064 | MVR | M36C05 | NOTEST | 0       | 0       | 0          | 0         | 1       | 1         |
| gene2369 | gene2369 | SACOL2373 | gi 57650036 ref NC_002951.2 :2431126-2432404 | MVR | M36C05 | OK     | 6.93588 | 2.35212 | -1.56012   | 2.21295   | 0.0269  | 0.309278  |
| gene237  | gene237  | lytR      | gi 57650036 ref NC_002951.2 :287180-287921   | MVR | M36C05 | OK     | 9.0472  | 6.11813 | -0.564379  | 0.805482  | 0.42054 | 0.999883  |
| gene2370 | gene2370 | SACOL2374 | gi 57650036 ref NC_002951.2 :2432564-2433188 | MVR | M36C05 | OK     | 25.5739 | 8.85111 | -1.53074   | 2.21385   | 0.02684 | 0.309278  |
| gene2371 | gene2371 | SACOL2375 | gi 57650036 ref NC_002951.2 :2433233-2434178 | MVR | M36C05 | OK     | 51.9879 | 27.5336 | -0.916986  | 1.27504   | 0.2023  | 0.871437  |

|          |          |           |                                              |     |        |        |         |         |            |           |         |           |
|----------|----------|-----------|----------------------------------------------|-----|--------|--------|---------|---------|------------|-----------|---------|-----------|
| gene2372 | gene2372 | SACOL2376 | gi 57650036 ref NC_002951.2 :2434263-2435706 | MVR | M36C05 | OK     | 4.41399 | 5.67562 | 0.362695   | -0.52994  | 0.59615 | 0.999883  |
| gene2373 | gene2373 | SACOL2377 | gi 57650036 ref NC_002951.2 :2435888-2436272 | MVR | M36C05 | OK     | 92.1258 | 138.098 | 0.58402    | -0.834937 | 0.40375 | 0.999883  |
| gene2374 | gene2374 | SACOL2378 | gi 57650036 ref NC_002951.2 :2437759-2439865 | MVR | M36C05 | OK     | 17.1865 | 12.0844 | -0.508134  | 0.709317  | 0.47813 | 0.999883  |
| gene2375 | gene2375 | SACOL2379 | gi 57650036 ref NC_002951.2 :2439935-2440358 | MVR | M36C05 | OK     | 139.532 | 1079.45 | 2.95163    | -3.60805  | 0.00031 | 0.0136973 |
| gene2376 | gene2376 | SACOL2380 | gi 57650036 ref NC_002951.2 :2440453-2440576 | MVR | M36C05 | NOTEST | 0       | 0       | 0          | 0         | 1       | 1         |
| gene2377 | gene2377 | SACOL2381 | gi 57650036 ref NC_002951.2 :2440622-2440979 | MVR | M36C05 | OK     | 29.6461 | 44.2339 | 0.577311   | -0.837532 | 0.40229 | 0.999883  |
| gene2378 | gene2378 | SACOL2382 | gi 57650036 ref NC_002951.2 :2441382-2442660 | MVR | M36C05 | OK     | 148.15  | 128.14  | -0.209346  | 0.242811  | 0.80815 | 0.999883  |
| gene2379 | gene2379 | SACOL2383 | gi 57650036 ref NC_002951.2 :2442841-2443207 | MVR | M36C05 | OK     | 34.3651 | 12.4675 | -1.46277   | 2.0381    | 0.04154 | 0.39608   |
| gene238  | gene238  | lrgA      | gi 57650036 ref NC_002951.2 :288033-289171   | MVR | M36C05 | OK     | 2.37584 | 2.26039 | -0.0718677 | 0.040959  | 0.96733 | 0.999883  |
| gene2380 | gene2380 | sarZ      | gi 57650036 ref NC_002951.2 :2443604-2444051 | MVR | M36C05 | OK     | 14.5901 | 6.25298 | -1.22238   | 1.63979   | 0.10105 | 0.639058  |
| gene2381 | gene2381 | SACOL2385 | gi 57650036 ref NC_002951.2 :2444266-2444695 | MVR | M36C05 | OK     | 175.192 | 101.073 | -0.793533  | 1.10059   | 0.27108 | 0.954536  |
| gene2382 | gene2382 | SACOL2386 | gi 57650036 ref NC_002951.2 :2444801-2445971 | MVR | M36C05 | OK     | 2.59643 | 13.5259 | 2.38112    | -3.36392  | 0.00077 | 0.0282292 |
| gene2383 | gene2383 | SACOL2387 | gi 57650036 ref NC_002951.2 :2446340-2447974 | MVR | M36C05 | OK     | 1.69248 | 0.92549 | -0.870852  | 0.691108  | 0.4895  | 0.999883  |
| gene2384 | gene2384 | SACOL2388 | gi 57650036 ref NC_002951.2 :2446340-2447974 | MVR | M36C05 | OK     | 2.60107 | 3.263   | 0.327096   | -0.351076 | 0.72553 | 0.999883  |
| gene2385 | gene2385 | SACOL2389 | gi 57650036 ref NC_002951.2 :2448231-2448885 | MVR | M36C05 | OK     | 32.085  | 22.6076 | -0.505093  | 0.739543  | 0.45958 | 0.999883  |
| gene2386 | gene2386 | SACOL2390 | gi 57650036 ref NC_002951.2 :2448907-2449942 | MVR | M36C05 | OK     | 30.1407 | 37.7686 | 0.325475   | -0.453846 | 0.64994 | 0.999883  |
| gene2387 | gene2387 | SACOL2391 | gi 57650036 ref NC_002951.2 :2449965-2450418 | MVR | M36C05 | OK     | 26.4054 | 39.2526 | 0.571958   | -0.83833  | 0.40185 | 0.999883  |
| gene2388 | gene2388 | narI      | gi 57650036 ref NC_002951.2 :2450437-2456914 | MVR | M36C05 | OK     | 19.3159 | 30.2433 | 0.646826   | -0.534398 | 0.59307 | 0.999883  |
| gene2389 | gene2389 | narJ      | gi 57650036 ref NC_002951.2 :2450437-2456914 | MVR | M36C05 | OK     | 0.637   | 5.36448 | 3.07408    | -0.617666 | 0.5368  | 0.999883  |
| gene239  | gene239  | lrgB      | gi 57650036 ref NC_002951.2 :288033-289171   | MVR | M36C05 | OK     | 3.91397 | 6.81407 | 0.799884   | -1.00613  | 0.31435 | 0.997798  |
| gene2390 | gene2390 | narH      | gi 57650036 ref NC_002951.2 :2450437-2456914 | MVR | M36C05 | OK     | 2.14509 | 8.3479  | 1.96038    | -1.18829  | 0.23472 | 0.903063  |
| gene2391 | gene2391 | narG      | gi 57650036 ref NC_002951.2 :2450437-2456914 | MVR | M36C05 | OK     | 1.63702 | 6.12474 | 1.90358    | -1.6048   | 0.10854 | 0.655122  |
| gene2392 | gene2392 | SACOL2396 | gi 57650036 ref NC_002951.2 :2457223-2458506 | MVR | M36C05 | OK     | 6.28204 | 12.0482 | 0.939518   | -1.3352   | 0.18181 | 0.829614  |
| gene2393 | gene2393 | nirD      | gi 57650036 ref NC_002951.2 :2457223-2458506 | MVR | M36C05 | OK     | 2.78684 | 3.63897 | 0.3849     | -0.125963 | 0.89976 | 0.999883  |
| gene2394 | gene2394 | nirB      | gi 57650036 ref NC_002951.2 :2458509-2460915 | MVR | M36C05 | OK     | 2.30534 | 3.89639 | 0.757162   | -1.10577  | 0.26883 | 0.952424  |
| gene2395 | gene2395 | nirR      | gi 57650036 ref NC_002951.2 :2460980-2461712 | MVR | M36C05 | OK     | 4.48861 | 5.18484 | 0.208031   | -0.285192 | 0.7755  | 0.999883  |
| gene2396 | gene2396 | SACOL2400 | gi 57650036 ref NC_002951.2 :2461941-2462478 | MVR | M36C05 | OK     | 10.4491 | 20.642  | 0.982204   | -1.41144  | 0.15812 | 0.776836  |
| gene2397 | gene2397 | SACOL2401 | gi 57650036 ref NC_002951.2 :2462710-2463535 | MVR | M36C05 | OK     | 13.6207 | 13.4133 | -0.0221398 | 0.032553  | 0.97403 | 0.999883  |
| gene2398 | gene2398 | SACOL2402 | gi 57650036 ref NC_002951.2 :2464017-2464485 | MVR | M36C05 | OK     | 18.136  | 30.8912 | 0.768337   | -1.1182   | 0.26348 | 0.945272  |
| gene2399 | gene2399 | SACOL2403 | gi 57650036 ref NC_002951.2 :2464670-2466221 | MVR | M36C05 | OK     | 4.98038 | 8.64831 | 0.796162   | -1.16685  | 0.24327 | 0.916482  |
| gene24   | gene24   | yycJ      | gi 57650036 ref NC_002951.2 :29997-30798     | MVR | M36C05 | OK     | 55.836  | 48.0898 | -0.215466  | 0.297777  | 0.76587 | 0.999883  |
| gene240  | gene240  | SACOL0249 | gi 57650036 ref NC_002951.2 :289278-289983   | MVR | M36C05 | OK     | 45.9456 | 114.494 | 1.31728    | -1.78402  | 0.07442 | 0.538042  |
| gene2400 | gene2400 | SACOL2404 | gi 57650036 ref NC_002951.2 :2466515-2467033 | MVR | M36C05 | OK     | 12.7354 | 34.0752 | 1.41988    | -1.02138  | 0.30708 | 0.991033  |

|          |          |           |                                              |     |        |        |         |         |              |            |         |          |
|----------|----------|-----------|----------------------------------------------|-----|--------|--------|---------|---------|--------------|------------|---------|----------|
| gene2401 | gene2401 | SACOL2405 | gi 57650036 ref NC_002951.2 :2466515-2467033 | MVR | M36C05 | OK     | 51.0578 | 105.515 | 1.04724      | -1.31229   | 0.18942 | 0.848649 |
| gene2402 | gene2402 | SACOL2406 | gi 57650036 ref NC_002951.2 :2467197-2467296 | MVR | M36C05 | NOTEST | 0       | 0       | 0            | 0          | 1       | 1        |
| gene2403 | gene2403 | SACOL2407 | gi 57650036 ref NC_002951.2 :2467305-2467905 | MVR | M36C05 | OK     | 55.8054 | 38.9128 | -0.520161    | 0.749485   | 0.45357 | 0.999883 |
| gene2404 | gene2404 | SACOL2408 | gi 57650036 ref NC_002951.2 :2467923-2468295 | MVR | M36C05 | OK     | 57.1644 | 36.8086 | -0.635073    | 0.931789   | 0.35145 | 0.999883 |
| gene2405 | gene2405 | fmhA      | gi 57650036 ref NC_002951.2 :2468540-2469791 | MVR | M36C05 | OK     | 11.3321 | 7.1329  | -0.66786     | 0.980075   | 0.32705 | 0.999883 |
| gene2406 | gene2406 | SACOL2410 | gi 57650036 ref NC_002951.2 :2469887-2472095 | MVR | M36C05 | OK     | 354.715 | 268.989 | -0.399111    | 0.301949   | 0.76269 | 0.999883 |
| gene2407 | gene2407 | SACOL2411 | gi 57650036 ref NC_002951.2 :2469887-2472095 | MVR | M36C05 | OK     | 181.536 | 198.769 | 0.130831     | -0.077059  | 0.93858 | 0.999883 |
| gene2408 | gene2408 | SACOL2412 | gi 57650036 ref NC_002951.2 :2469887-2472095 | MVR | M36C05 | OK     | 125.142 | 94.7218 | -0.401798    | 0.188612   | 0.8504  | 0.999883 |
| gene2409 | gene2409 | SACOL2413 | gi 57650036 ref NC_002951.2 :2472215-2473613 | MVR | M36C05 | OK     | 21.9692 | 22.1756 | 0.0134946    | -0.018936  | 0.98489 | 0.999883 |
| gene241  | gene241  | SACOL0250 | gi 57650036 ref NC_002951.2 :290131-290923   | MVR | M36C05 | OK     | 1.95587 | 1.49075 | -0.391778    | 0.461825   | 0.64421 | 0.999883 |
| gene2410 | gene2410 | SACOL2414 | gi 57650036 ref NC_002951.2 :2473829-2473934 | MVR | M36C05 | OK     | 0       | 3033.39 | 1.79769e+30  | 1.79769e+  | 0.06916 | 0.522414 |
| gene2411 | gene2411 | gpmA      | gi 57650036 ref NC_002951.2 :2474087-2474774 | MVR | M36C05 | OK     | 141.55  | 246.304 | 0.799127     | -0.982195  | 0.326   | 0.999883 |
| gene2412 | gene2412 | SACOL2416 | gi 57650036 ref NC_002951.2 :2475099-2475966 | MVR | M36C05 | OK     | 10.7308 | 15.5441 | 0.534617     | -0.784746  | 0.4326  | 0.999883 |
| gene2413 | gene2413 | SACOL2418 | gi 57650036 ref NC_002951.2 :2476717-2478028 | MVR | M36C05 | OK     | 16.0333 | 4.56441 | -1.81257     | 2.62472    | 0.00867 | 0.152769 |
| gene2414 | gene2414 | hlgA      | gi 57650036 ref NC_002951.2 :2478563-2479493 | MVR | M36C05 | OK     | 30.8116 | 17.8269 | -0.789421    | 1.13946    | 0.25451 | 0.932605 |
| gene2415 | gene2415 | SACOL2420 | gi 57650036 ref NC_002951.2 :2479556-2479682 | MVR | M36C05 | NOTEST | 0       | 0       | 0            | 0          | 1       | 1        |
| gene2416 | gene2416 | hlgC      | gi 57650036 ref NC_002951.2 :2480060-2481008 | MVR | M36C05 | OK     | 15.4268 | 8.10895 | -0.927849    | 1.35873    | 0.17423 | 0.821477 |
| gene2417 | gene2417 | hlgB      | gi 57650036 ref NC_002951.2 :2481009-2481987 | MVR | M36C05 | OK     | 13.805  | 10.7725 | -0.357829    | 0.5259     | 0.59896 | 0.999883 |
| gene2418 | gene2418 | SACOL2423 | gi 57650036 ref NC_002951.2 :2482038-2482506 | MVR | M36C05 | OK     | 1.67042 | 3.70694 | 1.15002      | -1.20074   | 0.22985 | 0.898677 |
| gene2419 | gene2419 | bioW      | gi 57650036 ref NC_002951.2 :2482516-2483209 | MVR | M36C05 | OK     | 3.11643 | 3.1336  | 0.00792584   | -0.010123  | 0.99192 | 0.999883 |
| gene242  | gene242  | bglA      | gi 57650036 ref NC_002951.2 :290938-292375   | MVR | M36C05 | OK     | 4.62868 | 7.57453 | 0.710555     | -1.04018   | 0.29826 | 0.980231 |
| gene2420 | gene2420 | SACOL2425 | gi 57650036 ref NC_002951.2 :2483219-2485320 | MVR | M36C05 | OK     | 2.16352 | 2.40739 | 0.154091     | -0.154757  | 0.87701 | 0.999883 |
| gene2421 | gene2421 | bioB      | gi 57650036 ref NC_002951.2 :2483219-2485320 | MVR | M36C05 | OK     | 2.75981 | 2.59304 | -0.0899242   | 0.091688   | 0.92695 | 0.999883 |
| gene2422 | gene2422 | bioA      | gi 57650036 ref NC_002951.2 :2485321-2487344 | MVR | M36C05 | OK     | 1.75196 | 1.61693 | -0.115706    | 0.136848   | 0.89115 | 0.999883 |
| gene2423 | gene2423 | bioD      | gi 57650036 ref NC_002951.2 :2485321-2487344 | MVR | M36C05 | OK     | 1.13644 | 1.58614 | 0.480991     | -0.324306  | 0.74571 | 0.999883 |
| gene2424 | gene2424 | SACOL2429 | gi 57650036 ref NC_002951.2 :2487564-2487708 | MVR | M36C05 | NOTEST | 0       | 0       | 0            | 0          | 1       | 1        |
| gene2425 | gene2425 | SACOL2430 | gi 57650036 ref NC_002951.2 :2487795-2489529 | MVR | M36C05 | OK     | 2.01415 | 1.79623 | -0.1652      | 0.230047   | 0.81806 | 0.999883 |
| gene2426 | gene2426 | SACOL2431 | gi 57650036 ref NC_002951.2 :2489553-2491317 | MVR | M36C05 | OK     | 1.25332 | 1.26847 | 0.0173338    | -0.023048  | 0.98161 | 0.999883 |
| gene2427 | gene2427 | SACOL2433 | gi 57650036 ref NC_002951.2 :2491944-2492052 | MVR | M36C05 | OK     | 6177.46 | 0       | -1.79769e+30 | -1.79769e+ | 0.01669 | 0.231165 |
| gene2428 | gene2428 | SACOL2434 | gi 57650036 ref NC_002951.2 :2492186-2492573 | MVR | M36C05 | OK     | 4.89731 | 13.4806 | 1.46082      | -1.80417   | 0.0712  | 0.523314 |
| gene2429 | gene2429 | SACOL2435 | gi 57650036 ref NC_002951.2 :2492840-2493983 | MVR | M36C05 | OK     | 31.0542 | 51.7955 | 0.738042     | -0.998219  | 0.31817 | 0.999883 |
| gene243  | gene243  | SACOL0252 | gi 57650036 ref NC_002951.2 :292808-293570   | MVR | M36C05 | OK     | 3.36902 | 4.90764 | 0.542703     | -0.732213  | 0.46404 | 0.999883 |
| gene2430 | gene2430 | SACOL2436 | gi 57650036 ref NC_002951.2 :2494042-2494702 | MVR | M36C05 | OK     | 54.4383 | 108.922 | 1.0006       | -1.36249   | 0.17304 | 0.821192 |

|          |          |           |                                              |     |        |        |         |         |            |           |         |           |
|----------|----------|-----------|----------------------------------------------|-----|--------|--------|---------|---------|------------|-----------|---------|-----------|
| gene2431 | gene2431 | bcr       | gi 57650036 ref NC_002951.2 :2494883-2496095 | MVR | M36C05 | OK     | 69.4329 | 48.37   | -0.521508  | 0.673857  | 0.5004  | 0.999883  |
| gene2432 | gene2432 | SACOL2438 | gi 57650036 ref NC_002951.2 :2496217-2496691 | MVR | M36C05 | OK     | 7.22337 | 13.2958 | 0.88023    | -1.20166  | 0.22949 | 0.898537  |
| gene2433 | gene2433 | SACOL2439 | gi 57650036 ref NC_002951.2 :2496803-2497460 | MVR | M36C05 | OK     | 45.7693 | 92.0091 | 1.0074     | -1.39341  | 0.1635  | 0.793042  |
| gene2434 | gene2434 | SACOL2440 | gi 57650036 ref NC_002951.2 :2497522-2498329 | MVR | M36C05 | OK     | 5.11496 | 7.9962  | 0.644592   | -0.916377 | 0.35947 | 0.999883  |
| gene2435 | gene2435 | SACOL2441 | gi 57650036 ref NC_002951.2 :2498614-2500024 | MVR | M36C05 | OK     | 90.637  | 101.396 | 0.161836   | -0.193078 | 0.8469  | 0.999883  |
| gene2436 | gene2436 | SACOL2442 | gi 57650036 ref NC_002951.2 :2500161-2502240 | MVR | M36C05 | OK     | 30.3958 | 22.7566 | -0.417586  | 0.549271  | 0.58282 | 0.999883  |
| gene2437 | gene2437 | SACOL2443 | gi 57650036 ref NC_002951.2 :2502379-2504209 | MVR | M36C05 | OK     | 28.2245 | 13.3879 | -1.07603   | 1.47749   | 0.13954 | 0.736061  |
| gene2438 | gene2438 | SACOL2445 | gi 57650036 ref NC_002951.2 :2504440-2505937 | MVR | M36C05 | OK     | 25.5445 | 21.7567 | -0.231557  | 0.320227  | 0.7488  | 0.999883  |
| gene2439 | gene2439 | SACOL2446 | gi 57650036 ref NC_002951.2 :2506028-2506880 | MVR | M36C05 | OK     | 20.7635 | 31.8044 | 0.615178   | -0.88956  | 0.3737  | 0.999883  |
| gene244  | gene244  | rbsK      | gi 57650036 ref NC_002951.2 :293820-294735   | MVR | M36C05 | OK     | 12.4398 | 12.6484 | 0.0239932  | -0.035284 | 0.97185 | 0.999883  |
| gene2440 | gene2440 | SACOL2448 | gi 57650036 ref NC_002951.2 :2507201-2508137 | MVR | M36C05 | OK     | 11.9087 | 6.89274 | -0.788871  | 1.15226   | 0.24922 | 0.922545  |
| gene2441 | gene2441 | SACOL2449 | gi 57650036 ref NC_002951.2 :2508362-2509763 | MVR | M36C05 | OK     | 40.0997 | 52.3175 | 0.383704   | -0.499233 | 0.61762 | 0.999883  |
| gene2442 | gene2442 | SACOL2450 | gi 57650036 ref NC_002951.2 :2510056-2511693 | MVR | M36C05 | OK     | 27.3743 | 60.0675 | 1.13377    | -0.937357 | 0.34858 | 0.999883  |
| gene2443 | gene2443 | SACOL2451 | gi 57650036 ref NC_002951.2 :2510056-2511693 | MVR | M36C05 | OK     | 25.1659 | 64.505  | 1.35794    | -1.37965  | 0.16769 | 0.806453  |
| gene2444 | gene2444 | SACOL2452 | gi 57650036 ref NC_002951.2 :2511709-2513568 | MVR | M36C05 | OK     | 14.0467 | 46.8324 | 1.73727    | -1.06989  | 0.28467 | 0.971771  |
| gene2445 | gene2445 | SACOL2453 | gi 57650036 ref NC_002951.2 :2511709-2513568 | MVR | M36C05 | OK     | 20.466  | 68.7033 | 1.74715    | -2.01222  | 0.0442  | 0.409545  |
| gene2446 | gene2446 | SACOL2454 | gi 57650036 ref NC_002951.2 :2513894-2514014 | MVR | M36C05 | NOTEST | 0       | 0       | 0          | 0         | 1       | 1         |
| gene2447 | gene2447 | SACOL2456 | gi 57650036 ref NC_002951.2 :2514237-2515000 | MVR | M36C05 | OK     | 38.3954 | 27.0458 | -0.50553   | 0.739119  | 0.45984 | 0.999883  |
| gene2448 | gene2448 | SACOL2457 | gi 57650036 ref NC_002951.2 :2514237-2515000 | MVR | M36C05 | NOTEST | 0       | 0       | 0          | 0         | 1       | 1         |
| gene2449 | gene2449 | SACOL2458 | gi 57650036 ref NC_002951.2 :2515016-2516654 | MVR | M36C05 | OK     | 30.8567 | 30.2763 | -0.027399  | 0.036482  | 0.9709  | 0.999883  |
| gene245  | gene245  | SACOL0254 | gi 57650036 ref NC_002951.2 :294762-295167   | MVR | M36C05 | OK     | 5.72047 | 3.75458 | -0.607482  | 0.700959  | 0.48333 | 0.999883  |
| gene2450 | gene2450 | pnbA      | gi 57650036 ref NC_002951.2 :2517261-2518614 | MVR | M36C05 | OK     | 14.2455 | 97.1388 | 2.76954    | -3.61552  | 0.0003  | 0.0133906 |
| gene2451 | gene2451 | SACOL2460 | gi 57650036 ref NC_002951.2 :2518675-2519863 | MVR | M36C05 | OK     | 8.61455 | 10.1547 | 0.237299   | -0.348829 | 0.72722 | 0.999883  |
| gene2452 | gene2452 | SACOL2461 | gi 57650036 ref NC_002951.2 :2520258-2521690 | MVR | M36C05 | OK     | 7.82413 | 50.2842 | 2.6841     | -3.12703  | 0.00177 | 0.0528066 |
| gene2453 | gene2453 | SACOL2462 | gi 57650036 ref NC_002951.2 :2520258-2521690 | MVR | M36C05 | OK     | 5.06042 | 24.0742 | 2.25016    | -1.73097  | 0.08346 | 0.574119  |
| gene2454 | gene2454 | pepA2     | gi 57650036 ref NC_002951.2 :2521937-2523014 | MVR | M36C05 | OK     | 61.7019 | 91.7811 | 0.572882   | -0.730439 | 0.46512 | 0.999883  |
| gene2455 | gene2455 | SACOL2464 | gi 57650036 ref NC_002951.2 :2523368-2523892 | MVR | M36C05 | OK     | 46.6965 | 55.8833 | 0.259102   | -0.259987 | 0.79487 | 0.999883  |
| gene2456 | gene2456 | SACOL2465 | gi 57650036 ref NC_002951.2 :2523368-2523892 | MVR | M36C05 | OK     | 60.7722 | 67.3241 | 0.147712   | -0.158151 | 0.87434 | 0.999883  |
| gene2457 | gene2457 | SACOL2466 | gi 57650036 ref NC_002951.2 :2523997-2524192 | MVR | M36C05 | NOTEST | 0       | 0       | 0          | 0         | 1       | 1         |
| gene2458 | gene2458 | SACOL2467 | gi 57650036 ref NC_002951.2 :2524250-2524706 | MVR | M36C05 | OK     | 36.6017 | 61.6428 | 0.752021   | -1.09877  | 0.27187 | 0.956024  |
| gene2459 | gene2459 | SACOL2469 | gi 57650036 ref NC_002951.2 :2524873-2526451 | MVR | M36C05 | OK     | 15.5072 | 19.8371 | 0.355264   | -0.502035 | 0.61564 | 0.999883  |
| gene246  | gene246  | SACOL0255 | gi 57650036 ref NC_002951.2 :295181-296063   | MVR | M36C05 | OK     | 7.28705 | 6.95402 | -0.0674876 | 0.09762   | 0.92223 | 0.999883  |
| gene2460 | gene2460 | SACOL2470 | gi 57650036 ref NC_002951.2 :2526645-2527395 | MVR | M36C05 | OK     | 14.0057 | 11.0327 | -0.344217  | 0.504278  | 0.61407 | 0.999883  |

|          |          |           |                                              |     |        |        |         |         |            |           |          |           |
|----------|----------|-----------|----------------------------------------------|-----|--------|--------|---------|---------|------------|-----------|----------|-----------|
| gene2461 | gene2461 | SACOL2471 | gi 57650036 ref NC_002951.2 :2527618-2528812 | MVR | M36C05 | OK     | 4.34093 | 5.98946 | 0.46442    | -0.672542 | 0.50124  | 0.999883  |
| gene2462 | gene2462 | SACOL2472 | gi 57650036 ref NC_002951.2 :2528823-2532179 | MVR | M36C05 | OK     | 2.66774 | 0.60179 | -2.1483    | 1.07241   | 0.28354  | 0.96973   |
| gene2463 | gene2463 | SACOL2473 | gi 57650036 ref NC_002951.2 :2528823-2532179 | MVR | M36C05 | OK     | 1.58031 | 1.61166 | 0.0283378  | -0.018159 | 0.98551  | 0.999883  |
| gene2464 | gene2464 | SACOL2474 | gi 57650036 ref NC_002951.2 :2528823-2532179 | MVR | M36C05 | OK     | 2.26291 | 1.31697 | -0.780956  | 0.546404  | 0.58479  | 0.999883  |
| gene2465 | gene2465 | SACOL2475 | gi 57650036 ref NC_002951.2 :2528823-2532179 | MVR | M36C05 | OK     | 2.54601 | 2.54732 | 0.00074265 | -0.000661 | 0.99947  | 0.999883  |
| gene2466 | gene2466 | SACOL2476 | gi 57650036 ref NC_002951.2 :2532191-2533790 | MVR | M36C05 | OK     | 4.59388 | 8.74534 | 0.928801   | -1.35966  | 0.17394  | 0.821477  |
| gene2467 | gene2467 | SACOL2477 | gi 57650036 ref NC_002951.2 :2533932-2535147 | MVR | M36C05 | OK     | 0.41309 | 1.08619 | 1.39473    | -1.46857  | 0.14195  | 0.740572  |
| gene2468 | gene2468 | SACOL2478 | gi 57650036 ref NC_002951.2 :2535226-2536045 | MVR | M36C05 | NOTEST | 0.98272 | 0.71282 | -0.463245  | 0.464312  | 0.64242  | 1         |
| gene2469 | gene2469 | SACOL2479 | gi 57650036 ref NC_002951.2 :2536055-2536877 | MVR | M36C05 | OK     | 1.07557 | 0.53203 | -1.01552   | 0.980199  | 0.32699  | 0.999883  |
| gene247  | gene247  | SACOL0257 | gi 57650036 ref NC_002951.2 :296294-297293   | MVR | M36C05 | OK     | 6.03642 | 29.2591 | 2.27712    | -3.25879  | 0.00112  | 0.0373153 |
| gene2470 | gene2470 | SACOL2480 | gi 57650036 ref NC_002951.2 :2537024-2537156 | MVR | M36C05 | NOTEST | 0       | 0       | 0          | 0         | 1        | 1         |
| gene2471 | gene2471 | SACOL2481 | gi 57650036 ref NC_002951.2 :2537619-2537985 | MVR | M36C05 | OK     | 6.71501 | 71.524  | 3.41297    | -4.43909  | 9.03E-06 | 0.0007783 |
| gene2472 | gene2472 | fabG2     | gi 57650036 ref NC_002951.2 :2538247-2539066 | MVR | M36C05 | OK     | 11.1047 | 124.921 | 3.49177    | -4.69936  | 2.61E-06 | 0.0002518 |
| gene2473 | gene2473 | SACOL2483 | gi 57650036 ref NC_002951.2 :2539298-2540837 | MVR | M36C05 | OK     | 40.7848 | 116.976 | 1.52011    | -1.85588  | 0.06347  | 0.504373  |
| gene2474 | gene2474 | SACOL2484 | gi 57650036 ref NC_002951.2 :2540948-2541371 | MVR | M36C05 | OK     | 22.0925 | 204.034 | 3.20718    | -4.42492  | 9.65E-06 | 0.0008119 |
| gene2475 | gene2475 | SACOL2485 | gi 57650036 ref NC_002951.2 :2541822-2542242 | MVR | M36C05 | OK     | 83.4607 | 178.227 | 1.09454    | -1.52643  | 0.1269   | 0.707666  |
| gene2476 | gene2476 | SACOL2486 | gi 57650036 ref NC_002951.2 :2542259-2542679 | MVR | M36C05 | OK     | 26.8372 | 79.1006 | 1.55946    | -2.26082  | 0.02377  | 0.292955  |
| gene2477 | gene2477 | SACOL2487 | gi 57650036 ref NC_002951.2 :2542945-2543368 | MVR | M36C05 | OK     | 1.16277 | 5.92835 | 2.35007    | -2.13427  | 0.03282  | 0.347766  |
| gene2478 | gene2478 | SACOL2488 | gi 57650036 ref NC_002951.2 :2543618-2544314 | MVR | M36C05 | OK     | 72.709  | 205.787 | 1.50095    | -1.92232  | 0.05457  | 0.462964  |
| gene2479 | gene2479 | SACOL2489 | gi 57650036 ref NC_002951.2 :2544761-2544884 | MVR | M36C05 | NOTEST | 0       | 0       | 0          | 0         | 1        | 1         |
| gene248  | gene248  | SACOL0258 | gi 57650036 ref NC_002951.2 :297443-297623   | MVR | M36C05 | NOTEST | 0       | 0       | 0          | 0         | 1        | 1         |
| gene2480 | gene2480 | SACOL2491 | gi 57650036 ref NC_002951.2 :2545143-2545335 | MVR | M36C05 | OK     | 96.5754 | 166.929 | 0.789505   | -1.09573  | 0.2732   | 0.958375  |
| gene2481 | gene2481 | SACOL2492 | gi 57650036 ref NC_002951.2 :2545769-2545892 | MVR | M36C05 | NOTEST | 0       | 0       | 0          | 0         | 1        | 1         |
| gene2482 | gene2482 | SACOL2493 | gi 57650036 ref NC_002951.2 :2545895-2546690 | MVR | M36C05 | OK     | 5.8368  | 6.11828 | 0.0679468  | -0.096215 | 0.92335  | 0.999883  |
| gene2483 | gene2483 | SACOL2494 | gi 57650036 ref NC_002951.2 :2547225-2547513 | MVR | M36C05 | NOTEST | 0       | 0       | 0          | 0         | 1        | 1         |
| gene2484 | gene2484 | SACOL2495 | gi 57650036 ref NC_002951.2 :2547515-2547842 | MVR | M36C05 | NOTEST | 0       | 0       | 0          | 0         | 1        | 1         |
| gene2485 | gene2485 | SACOL2496 | gi 57650036 ref NC_002951.2 :2548053-2549948 | MVR | M36C05 | NOTEST | 0       | 0       | 0          | 0         | 1        | 1         |
| gene2486 | gene2486 | SACOL2497 | gi 57650036 ref NC_002951.2 :2548053-2549948 | MVR | M36C05 | NOTEST | 0       | 0       | 0          | 0         | 1        | 1         |
| gene2487 | gene2487 | SACOL2498 | gi 57650036 ref NC_002951.2 :2550059-2550836 | MVR | M36C05 | OK     | 6.0267  | 4.20628 | -0.518821  | 0.72022   | 0.47139  | 0.999883  |
| gene2488 | gene2488 | SACOL2499 | gi 57650036 ref NC_002951.2 :2551138-2554000 | MVR | M36C05 | OK     | 11.7739 | 9.97593 | -0.239066  | 0.332372  | 0.73961  | 0.999883  |
| gene2489 | gene2489 | SACOL2500 | gi 57650036 ref NC_002951.2 :2554001-2554394 | MVR | M36C05 | OK     | 16.5879 | 19.9011 | 0.262717   | -0.37018  | 0.71125  | 0.999883  |
| gene249  | gene249  | SACOL0259 | gi 57650036 ref NC_002951.2 :297672-298065   | MVR | M36C05 | OK     | 4.73939 | 4.54882 | -0.0592108 | 0.067562  | 0.94613  | 0.999883  |
| gene2490 | gene2490 | SACOL2501 | gi 57650036 ref NC_002951.2 :2554510-2556319 | MVR | M36C05 | OK     | 24.9083 | 32.1942 | 0.370175   | -0.491104 | 0.62335  | 0.999883  |

|          |          |           |                                              |     |        |        |         |         |            |           |          |           |
|----------|----------|-----------|----------------------------------------------|-----|--------|--------|---------|---------|------------|-----------|----------|-----------|
| gene2491 | gene2491 | SACOL2502 | gi 57650036 ref NC_002951.2 :2556602-2556869 | MVR | M36C05 | OK     | 24.6218 | 96.7736 | 1.97468    | -2.72201  | 0.00649  | 0.126644  |
| gene2492 | gene2492 | SACOL2503 | gi 57650036 ref NC_002951.2 :2557012-2557321 | MVR | M36C05 | OK     | 3.50209 | 29.4773 | 3.07332    | -3.31006  | 0.00093  | 0.0326101 |
| gene2493 | gene2493 | SACOL2504 | gi 57650036 ref NC_002951.2 :2557642-2558836 | MVR | M36C05 | OK     | 4.64239 | 7.32045 | 0.657066   | -0.95595  | 0.3391   | 0.999883  |
| gene2494 | gene2494 | SACOL2505 | gi 57650036 ref NC_002951.2 :2559219-2562951 | MVR | M36C05 | OK     | 8.90415 | 7.83002 | -0.185462  | 0.257273  | 0.79697  | 0.999883  |
| gene2495 | gene2495 | sarT      | gi 57650036 ref NC_002951.2 :2563255-2563612 | MVR | M36C05 | OK     | 3.3404  | 1.38231 | -1.27294   | 1.05155   | 0.29301  | 0.976946  |
| gene2496 | gene2496 | sarU      | gi 57650036 ref NC_002951.2 :2563935-2564679 | MVR | M36C05 | NOTEST | 0.22488 | 0.40562 | 0.85101    | -0.514881 | 0.60664  | 1         |
| gene2497 | gene2497 | galU      | gi 57650036 ref NC_002951.2 :2564889-2565756 | MVR | M36C05 | OK     | 41.8318 | 22.324  | -0.906004  | 1.29245   | 0.1962   | 0.858993  |
| gene2498 | gene2498 | fnbB      | gi 57650036 ref NC_002951.2 :2565935-2568758 | MVR | M36C05 | OK     | 8.48466 | 5.37723 | -0.657994  | 0.948039  | 0.34311  | 0.999883  |
| gene2499 | gene2499 | SACOL2510 | gi 57650036 ref NC_002951.2 :2568918-2569041 | MVR | M36C05 | NOTEST | 0       | 0       | 0          | 0         | 1        | 1         |
| gene25   | gene25   | SACOL0024 | gi 57650036 ref NC_002951.2 :31025-33344     | MVR | M36C05 | OK     | 8.4037  | 4.31646 | -0.961176  | 1.40075   | 0.16129  | 0.784966  |
| gene250  | gene250  | SACOL0260 | gi 57650036 ref NC_002951.2 :298292-298697   | MVR | M36C05 | NOTEST | 0       | 0       | 0          | 0         | 1        | 1         |
| gene2500 | gene2500 | fnbA      | gi 57650036 ref NC_002951.2 :2569439-2572496 | MVR | M36C05 | OK     | 27.5224 | 27.2674 | -0.0134283 | 0.016788  | 0.98661  | 0.999883  |
| gene2501 | gene2501 | SACOL2513 | gi 57650036 ref NC_002951.2 :2572737-2572932 | MVR | M36C05 | NOTEST | 0       | 0       | 0          | 0         | 1        | 1         |
| gene2502 | gene2502 | gntP      | gi 57650036 ref NC_002951.2 :2572963-2574322 | MVR | M36C05 | OK     | 10.8209 | 6.84819 | -0.660027  | 0.968284  | 0.3329   | 0.999883  |
| gene2503 | gene2503 | gntK      | gi 57650036 ref NC_002951.2 :2574438-2575992 | MVR | M36C05 | OK     | 5.7607  | 3.82613 | -0.590359  | 0.862408  | 0.38846  | 0.999883  |
| gene2504 | gene2504 | gntR      | gi 57650036 ref NC_002951.2 :2576015-2576696 | MVR | M36C05 | OK     | 7.41983 | 5.73556 | -0.371451  | 0.519748  | 0.60324  | 0.999883  |
| gene2505 | gene2505 | SACOL2517 | gi 57650036 ref NC_002951.2 :2576849-2577614 | MVR | M36C05 | OK     | 52.957  | 53.697  | 0.0200185  | -0.027765 | 0.97785  | 0.999883  |
| gene2506 | gene2506 | SACOL2518 | gi 57650036 ref NC_002951.2 :2577778-2578471 | MVR | M36C05 | OK     | 18.9479 | 19.6969 | 0.0559312  | -0.082238 | 0.93446  | 0.999883  |
| gene2507 | gene2507 | SACOL2519 | gi 57650036 ref NC_002951.2 :2578701-2579190 | MVR | M36C05 | OK     | 132.678 | 2623.22 | 4.30533    | -4.97663  | 6.47E-07 | 8.36E-05  |
| gene2508 | gene2508 | SACOL2520 | gi 57650036 ref NC_002951.2 :2579256-2581149 | MVR | M36C05 | OK     | 15.3844 | 30.2055 | 0.973339   | -1.31955  | 0.18699  | 0.842603  |
| gene2509 | gene2509 | SACOL2521 | gi 57650036 ref NC_002951.2 :2581557-2582835 | MVR | M36C05 | OK     | 259.402 | 201.158 | -0.366862  | 0.403778  | 0.68638  | 0.999883  |
| gene251  | gene251  | SACOL0261 | gi 57650036 ref NC_002951.2 :298737-300114   | MVR | M36C05 | OK     | 2.73909 | 2.52877 | -0.115262  | 0.161413  | 0.87177  | 0.999883  |
| gene2510 | gene2510 | SACOL2522 | gi 57650036 ref NC_002951.2 :2583381-2583993 | MVR | M36C05 | OK     | 57.9998 | 99.6677 | 0.781079   | -1.07714  | 0.28142  | 0.965951  |
| gene2511 | gene2511 | SACOL2523 | gi 57650036 ref NC_002951.2 :2584089-2585710 | MVR | M36C05 | OK     | 3.35957 | 11.094  | 1.72342    | -2.40901  | 0.016    | 0.224781  |
| gene2512 | gene2512 | SACOL2524 | gi 57650036 ref NC_002951.2 :2584089-2585710 | MVR | M36C05 | OK     | 1.20771 | 0.83304 | -0.535812  | 0.139142  | 0.88934  | 0.999883  |
| gene2513 | gene2513 | SACOL2525 | gi 57650036 ref NC_002951.2 :2586137-2586833 | MVR | M36C05 | OK     | 5.07848 | 4.44945 | -0.190772  | 0.258996  | 0.79564  | 0.999883  |
| gene2514 | gene2514 | SACOL2526 | gi 57650036 ref NC_002951.2 :2586834-2587605 | MVR | M36C05 | OK     | 6.41344 | 5.603   | -0.1949    | 0.275085  | 0.78325  | 0.999883  |
| gene2515 | gene2515 | SACOL2527 | gi 57650036 ref NC_002951.2 :2587977-2589942 | MVR | M36C05 | OK     | 80.9309 | 153.231 | 0.920942   | -1.03643  | 0.3      | 0.982854  |
| gene2516 | gene2516 | SACOL2528 | gi 57650036 ref NC_002951.2 :2590285-2591365 | MVR | M36C05 | OK     | 34.9103 | 21.1755 | -0.721258  | 1.01832   | 0.30853  | 0.991033  |
| gene2517 | gene2517 | SACOL2529 | gi 57650036 ref NC_002951.2 :2591469-2592063 | MVR | M36C05 | OK     | 24.7999 | 28.0187 | 0.176056   | -0.258641 | 0.79591  | 0.999883  |
| gene2518 | gene2518 | SACOL2530 | gi 57650036 ref NC_002951.2 :2592084-2593053 | MVR | M36C05 | OK     | 4.00312 | 7.17024 | 0.840895   | -1.19886  | 0.23058  | 0.899834  |
| gene2519 | gene2519 | SACOL2531 | gi 57650036 ref NC_002951.2 :2593130-2593565 | MVR | M36C05 | OK     | 29.1341 | 27.2128 | -0.0984247 | 0.144016  | 0.88549  | 0.999883  |
| gene252  | gene252  | SACOL0262 | gi 57650036 ref NC_002951.2 :300347-301340   | MVR | M36C05 | OK     | 3.80219 | 9.31702 | 1.29304    | -1.84896  | 0.06446  | 0.508201  |



|          |          |             |                                              |     |        |        |         |         |            |           |          |           |
|----------|----------|-------------|----------------------------------------------|-----|--------|--------|---------|---------|------------|-----------|----------|-----------|
| gene2520 | gene2520 | SACOL2532   | gi 57650036 ref NC_002951.2 :2593791-2594076 | MVR | M36C05 | OK     | 67.0867 | 252.557 | 1.91251    | -2.74343  | 0.00608  | 0.121216  |
| gene2521 | gene2521 | SACOL2533   | gi 57650036 ref NC_002951.2 :2594246-2595053 | MVR | M36C05 | OK     | 100.394 | 262.421 | 1.38621    | -1.68383  | 0.09222  | 0.611738  |
| gene2522 | gene2522 | frp         | gi 57650036 ref NC_002951.2 :2595172-2595844 | MVR | M36C05 | OK     | 121.492 | 172.314 | 0.504183   | -0.641385 | 0.52127  | 0.999883  |
| gene2523 | gene2523 | SACOL2535   | gi 57650036 ref NC_002951.2 :2596113-2597106 | MVR | M36C05 | OK     | 1169.78 | 877.608 | -0.414591  | 0.423666  | 0.67181  | 0.999883  |
| gene2524 | gene2524 | SACOL2536   | gi 57650036 ref NC_002951.2 :2597354-2598155 | MVR | M36C05 | OK     | 9.22155 | 4.77227 | -0.950335  | 1.35112   | 0.17666  | 0.821477  |
| gene2525 | gene2525 | SACOL2537   | gi 57650036 ref NC_002951.2 :2598475-2599111 | MVR | M36C05 | OK     | 3.40527 | 5.06296 | 0.572212   | -0.746415 | 0.45542  | 0.999883  |
| gene2526 | gene2526 | SACOL2538   | gi 57650036 ref NC_002951.2 :2599116-2599848 | MVR | M36C05 | OK     | 9.32249 | 7.46616 | -0.320348  | 0.460678  | 0.64503  | 0.999883  |
| gene2527 | gene2527 | srtA        | gi 57650036 ref NC_002951.2 :2600007-2600628 | MVR | M36C05 | OK     | 131.926 | 95.6976 | -0.463178  | 0.613532  | 0.53952  | 0.999883  |
| gene2528 | gene2528 | SACOL2541   | gi 57650036 ref NC_002951.2 :2600821-2601313 | MVR | M36C05 | OK     | 16.1025 | 32.5202 | 1.01405    | -1.47457  | 0.14033  | 0.736447  |
| gene2529 | gene2529 | SACOL2542   | gi 57650036 ref NC_002951.2 :2601750-2601921 | MVR | M36C05 | OK     | 4.71154 | 7.63295 | 0.69604    | -0.297777 | 0.76587  | 0.999883  |
| gene253  | gene253  | lytM        | gi 57650036 ref NC_002951.2 :301647-302616   | MVR | M36C05 | OK     | 108.32  | 156.741 | 0.53309    | -0.647489 | 0.51732  | 0.999883  |
| gene2530 | gene2530 | SACOL2543   | gi 57650036 ref NC_002951.2 :2601982-2602081 | MVR | M36C05 | NOTEST | 0       | 0       | 0          | 0         | 1        | 1         |
| gene2531 | gene2531 | sdaAA       | gi 57650036 ref NC_002951.2 :2602099-2602999 | MVR | M36C05 | OK     | 7.69861 | 9.45347 | 0.296246   | -0.432211 | 0.66559  | 0.999883  |
| gene2532 | gene2532 | sdaAB       | gi 57650036 ref NC_002951.2 :2603012-2603693 | MVR | M36C05 | OK     | 2.43063 | 1.83538 | -0.405254  | 0.47771   | 0.63286  | 0.999883  |
| gene2533 | gene2533 | SACOL2546   | gi 57650036 ref NC_002951.2 :2603695-2604739 | MVR | M36C05 | OK     | 3.92237 | 2.74362 | -0.515646  | 0.712678  | 0.47605  | 0.999883  |
| gene2534 | gene2534 | SACOL2547   | gi 57650036 ref NC_002951.2 :2605290-2605494 | MVR | M36C05 | OK     | 31.0752 | 49.2491 | 0.664334   | -0.808318 | 0.41891  | 0.999883  |
| gene2535 | gene2535 | SACOL2548   | gi 57650036 ref NC_002951.2 :2605649-2606612 | MVR | M36C05 | OK     | 19.2285 | 32.8092 | 0.770852   | -1.10446  | 0.2694   | 0.952424  |
| gene2536 | gene2536 | SACOL2549   | gi 57650036 ref NC_002951.2 :2606693-2607662 | MVR | M36C05 | OK     | 45.9182 | 87.9071 | 0.936915   | -1.23303  | 0.21757  | 0.89416   |
| gene2537 | gene2537 | SACOL2550   | gi 57650036 ref NC_002951.2 :2607794-2608139 | MVR | M36C05 | OK     | 25.263  | 55.7528 | 1.14202    | -1.64296  | 0.10039  | 0.638047  |
| gene2538 | gene2538 | SACOL2551   | gi 57650036 ref NC_002951.2 :2608180-2608591 | MVR | M36C05 | OK     | 20.346  | 46.9358 | 1.20594    | -1.74642  | 0.08074  | 0.56563   |
| gene2539 | gene2539 | SACOL2552   | gi 57650036 ref NC_002951.2 :2608970-2611037 | MVR | M36C05 | OK     | 3.45925 | 3.83684 | 0.14946    | -0.219076 | 0.82659  | 0.999883  |
| gene254  | gene254  | SACOL0264   | gi 57650036 ref NC_002951.2 :302667-303327   | MVR | M36C05 | OK     | 11.9335 | 7.19747 | -0.729457  | 1.0438    | 0.29658  | 0.9791    |
| gene2540 | gene2540 | SACOL2553   | gi 57650036 ref NC_002951.2 :2611337-2613077 | MVR | M36C05 | OK     | 30.4785 | 169.691 | 2.47704    | -2.95261  | 0.00315  | 0.0802959 |
| gene2541 | gene2541 | SACOL2554   | gi 57650036 ref NC_002951.2 :2613123-2614201 | MVR | M36C05 | OK     | 15.0551 | 117.105 | 2.95947    | -3.95954  | 7.51E-05 | 0.0044914 |
| gene2542 | gene2542 | SACOL2554.1 | gi 57650036 ref NC_002951.2 :2613123-2614201 | MVR | M36C05 | NOTEST | 0.99938 | 0.56021 | -0.83507   | 0.064709  | 0.94841  | 1         |
| gene2543 | gene2543 | SACOL2555   | gi 57650036 ref NC_002951.2 :2614413-2615298 | MVR | M36C05 | OK     | 20.3466 | 20.4486 | 0.00721403 | -0.010528 | 0.9916   | 0.999883  |
| gene2544 | gene2544 | SACOL2556   | gi 57650036 ref NC_002951.2 :2615458-2615677 | MVR | M36C05 | OK     | 5831.75 | 1548.34 | -1.91321   | 2.26573   | 0.02347  | 0.292317  |
| gene2545 | gene2545 | SACOL2557   | gi 57650036 ref NC_002951.2 :2616065-2616497 | MVR | M36C05 | OK     | 218.469 | 52.7438 | -2.05035   | 2.84855   | 0.00439  | 0.0981908 |
| gene2546 | gene2546 | SACOL2559   | gi 57650036 ref NC_002951.2 :2617256-2617514 | MVR | M36C05 | OK     | 3.73983 | 2.99218 | -0.321773  | 0.237234  | 0.81248  | 0.999883  |
| gene2547 | gene2547 | SACOL2560   | gi 57650036 ref NC_002951.2 :2618092-2619370 | MVR | M36C05 | OK     | 42.6695 | 23.419  | -0.865529  | 1.18215   | 0.23715  | 0.906613  |
| gene2548 | gene2548 | SACOL2561   | gi 57650036 ref NC_002951.2 :2619623-2620790 | MVR | M36C05 | OK     | 101.955 | 30.2141 | -1.75464   | 2.27281   | 0.02304  | 0.288469  |
| gene2549 | gene2549 | ogt         | gi 57650036 ref NC_002951.2 :2620959-2621481 | MVR | M36C05 | OK     | 275.648 | 292.857 | 0.0873684  | -0.107632 | 0.91429  | 0.999883  |
| gene255  | gene255  | SACOL0265   | gi 57650036 ref NC_002951.2 :303340-305424   | MVR | M36C05 | OK     | 6.45999 | 5.04779 | -0.355881  | 0.348648  | 0.72735  | 0.999883  |

|          |          |           |                                              |     |        |        |         |         |              |            |          |           |
|----------|----------|-----------|----------------------------------------------|-----|--------|--------|---------|---------|--------------|------------|----------|-----------|
| gene2550 | gene2550 | SACOL2563 | gi 57650036 ref NC_002951.2 :2621889-2623995 | MVR | M36C05 | OK     | 14.7313 | 307.139 | 4.38194      | -5.13105   | 2.88E-07 | 4.26E-05  |
| gene2551 | gene2551 | feoB      | gi 57650036 ref NC_002951.2 :2624246-2626241 | MVR | M36C05 | OK     | 3.00539 | 2.27169 | -0.403783    | 0.582846   | 0.56     | 0.999883  |
| gene2552 | gene2552 | SACOL2565 | gi 57650036 ref NC_002951.2 :2626252-2626480 | MVR | M36C05 | OK     | 2.74492 | 0       | -1.79769e+3l | -1.79769e+ | 0.14006  | 0.736107  |
| gene2553 | gene2553 | SACOL2566 | gi 57650036 ref NC_002951.2 :2626695-2629185 | MVR | M36C05 | OK     | 10.4541 | 1.3955  | -2.90522     | 4.09862    | 4.16E-05 | 0.0026856 |
| gene2554 | gene2554 | SACOL2567 | gi 57650036 ref NC_002951.2 :2629392-2629878 | MVR | M36C05 | OK     | 2.44765 | 7.33508 | 1.58342      | -1.87144   | 0.06128  | 0.500012  |
| gene2555 | gene2555 | SACOL2568 | gi 57650036 ref NC_002951.2 :2629954-2630122 | MVR | M36C05 | OK     | 10.3885 | 8.4513  | -0.29775     | 0.155225   | 0.87664  | 0.999883  |
| gene2556 | gene2556 | SACOL2569 | gi 57650036 ref NC_002951.2 :2630233-2631778 | MVR | M36C05 | OK     | 269.144 | 287.652 | 0.0959462    | -0.10147   | 0.91918  | 0.999883  |
| gene2557 | gene2557 | SACOL2570 | gi 57650036 ref NC_002951.2 :2631967-2632567 | MVR | M36C05 | OK     | 12.9021 | 24.562  | 0.928822     | -1.35496   | 0.17543  | 0.821477  |
| gene2558 | gene2558 | SACOL2571 | gi 57650036 ref NC_002951.2 :2632805-2632997 | MVR | M36C05 | OK     | 83.1622 | 107.006 | 0.363687     | -0.490686  | 0.62365  | 0.999883  |
| gene2559 | gene2559 | SACOL2572 | gi 57650036 ref NC_002951.2 :2633236-2635645 | MVR | M36C05 | OK     | 25.2703 | 86.7515 | 1.77944      | -2.14361   | 0.03206  | 0.3441    |
| gene256  | gene256  | SACOL0266 | gi 57650036 ref NC_002951.2 :303340-305424   | MVR | M36C05 | OK     | 6.3877  | 4.33259 | -0.560066    | 0.611807   | 0.54067  | 0.999883  |
| gene2560 | gene2560 | SACOL2573 | gi 57650036 ref NC_002951.2 :2635935-2636142 | MVR | M36C05 | OK     | 130.903 | 247.571 | 0.919341     | -1.33246   | 0.18271  | 0.831085  |
| gene2561 | gene2561 | SACOL2574 | gi 57650036 ref NC_002951.2 :2636231-2637230 | MVR | M36C05 | OK     | 45.7259 | 89.4335 | 0.967803     | -1.26706   | 0.20513  | 0.877103  |
| gene2562 | gene2562 | SACOL2575 | gi 57650036 ref NC_002951.2 :2637252-2638407 | MVR | M36C05 | OK     | 18.0909 | 37.2902 | 1.04353      | -1.46274   | 0.14354  | 0.743774  |
| gene2563 | gene2563 | crtN      | gi 57650036 ref NC_002951.2 :2638833-2640342 | MVR | M36C05 | OK     | 15.5659 | 36.0407 | 1.21124      | -1.66441   | 0.09603  | 0.622731  |
| gene2564 | gene2564 | crtM      | gi 57650036 ref NC_002951.2 :2640353-2641217 | MVR | M36C05 | OK     | 10.9638 | 39.5345 | 1.85037      | -2.65346   | 0.00797  | 0.14471   |
| gene2565 | gene2565 | SACOL2578 | gi 57650036 ref NC_002951.2 :2641253-2644361 | MVR | M36C05 | OK     | 20.4331 | 95.6652 | 2.22709      | -1.62658   | 0.10383  | 0.645527  |
| gene2566 | gene2566 | SACOL2579 | gi 57650036 ref NC_002951.2 :2641253-2644361 | MVR | M36C05 | OK     | 21.0918 | 99.8358 | 2.24288      | -1.96518   | 0.04939  | 0.436462  |
| gene2567 | gene2567 | SACOL2580 | gi 57650036 ref NC_002951.2 :2641253-2644361 | MVR | M36C05 | OK     | 13.6419 | 81.7607 | 2.58336      | -0.905213  | 0.36535  | 0.999883  |
| gene2568 | gene2568 | SACOL2581 | gi 57650036 ref NC_002951.2 :2644535-2645303 | MVR | M36C05 | OK     | 628.435 | 159.656 | -1.9768      | 2.24923    | 0.0245   | 0.296972  |
| gene2569 | gene2569 | SACOL2582 | gi 57650036 ref NC_002951.2 :2645663-2647475 | MVR | M36C05 | OK     | 30.7543 | 19.2122 | -0.678765    | 0.914429   | 0.36049  | 0.999883  |
| gene257  | gene257  | SACOL0267 | gi 57650036 ref NC_002951.2 :305491-307015   | MVR | M36C05 | OK     | 26.8587 | 31.7193 | 0.239973     | -0.323838  | 0.74606  | 0.999883  |
| gene2570 | gene2570 | SACOL2583 | gi 57650036 ref NC_002951.2 :2647986-2648475 | MVR | M36C05 | NOTEST | 0       | 0       | 0            | 0          | 1        | 1         |
| gene2571 | gene2571 | isaA      | gi 57650036 ref NC_002951.2 :2648750-2649452 | MVR | M36C05 | OK     | 2962.14 | 402.47  | -2.87969     | 3.09021    | 0.002    | 0.0576706 |
| gene2572 | gene2572 | SACOL2585 | gi 57650036 ref NC_002951.2 :2650059-2651115 | MVR | M36C05 | OK     | 3.79553 | 3.73564 | -0.0229457   | 0.032241   | 0.97428  | 0.999883  |
| gene2573 | gene2573 | SACOL2587 | gi 57650036 ref NC_002951.2 :2651491-2652094 | MVR | M36C05 | OK     | 21.4364 | 12.8742 | -0.735584    | 1.07486    | 0.28244  | 0.967802  |
| gene2574 | gene2574 | SACOL2588 | gi 57650036 ref NC_002951.2 :2652291-2652792 | MVR | M36C05 | OK     | 3.58046 | 3.30163 | -0.116968    | 0.138154   | 0.89012  | 0.999883  |
| gene2575 | gene2575 | SACOL2589 | gi 57650036 ref NC_002951.2 :2653011-2653242 | MVR | M36C05 | OK     | 21.0197 | 20.8522 | -0.0115406   | 0.013686   | 0.98908  | 0.999883  |
| gene2576 | gene2576 | SACOL2590 | gi 57650036 ref NC_002951.2 :2653391-2653769 | MVR | M36C05 | OK     | 19.8727 | 47.3052 | 1.25121      | -1.79711   | 0.07232  | 0.527706  |
| gene2577 | gene2577 | SACOL2591 | gi 57650036 ref NC_002951.2 :2653785-2654607 | MVR | M36C05 | OK     | 11.7335 | 15.4289 | 0.395004     | -0.580148  | 0.56182  | 0.999883  |
| gene2578 | gene2578 | SACOL2592 | gi 57650036 ref NC_002951.2 :2654626-2654926 | MVR | M36C05 | OK     | 6.90056 | 2.03801 | -1.75956     | 1.49474    | 0.13498  | 0.729547  |
| gene2579 | gene2579 | SACOL2593 | gi 57650036 ref NC_002951.2 :2655056-2656311 | MVR | M36C05 | OK     | 6.29724 | 2.77569 | -1.18187     | 1.1026     | 0.2702   | 0.953794  |
| gene258  | gene258  | SACOL0268 | gi 57650036 ref NC_002951.2 :307285-307939   | MVR | M36C05 | NOTEST | 0       | 0       | 0            | 0          | 1        | 1         |

|          |          |           |                                              |     |        |        |         |         |            |           |          |           |
|----------|----------|-----------|----------------------------------------------|-----|--------|--------|---------|---------|------------|-----------|----------|-----------|
| gene2580 | gene2580 | SACOL2594 | gi 57650036 ref NC_002951.2 :2655056-2656311 | MVR | M36C05 | OK     | 4.86197 | 2.62201 | -0.890868  | 0.919745  | 0.35771  | 0.999883  |
| gene2581 | gene2581 | SACOL2595 | gi 57650036 ref NC_002951.2 :2656320-2657419 | MVR | M36C05 | NOTEST | 0       | 0       | 0          | 0         | 1        | 1         |
| gene2582 | gene2582 | SACOL2596 | gi 57650036 ref NC_002951.2 :2656320-2657419 | MVR | M36C05 | OK     | 6.46455 | 6.25463 | -0.0476241 | 0.06777   | 0.94597  | 0.999883  |
| gene2583 | gene2583 | SACOL2597 | gi 57650036 ref NC_002951.2 :2657438-2658269 | MVR | M36C05 | OK     | 13.1008 | 83.2097 | 2.66709    | -3.68452  | 0.00023  | 0.0109095 |
| gene2584 | gene2584 | SACOL2598 | gi 57650036 ref NC_002951.2 :2658415-2659306 | MVR | M36C05 | OK     | 7.18877 | 6.22489 | -0.207697  | 0.299575  | 0.7645   | 0.999883  |
| gene2585 | gene2585 | SACOL2599 | gi 57650036 ref NC_002951.2 :2659403-2660723 | MVR | M36C05 | OK     | 8.5378  | 4.72456 | -0.853685  | 1.24813   | 0.21199  | 0.891421  |
| gene2586 | gene2586 | SACOL2600 | gi 57650036 ref NC_002951.2 :2660737-2661844 | MVR | M36C05 | OK     | 7.68258 | 6.19982 | -0.309366  | 0.452236  | 0.6511   | 0.999883  |
| gene2587 | gene2587 | SACOL2601 | gi 57650036 ref NC_002951.2 :2662177-2662830 | MVR | M36C05 | OK     | 1.92932 | 10.4359 | 2.43538    | -1.29617  | 0.19492  | 0.856906  |
| gene2588 | gene2588 | SACOL2602 | gi 57650036 ref NC_002951.2 :2662177-2662830 | MVR | M36C05 | OK     | 8.92265 | 14.1953 | 0.669868   | -0.794638 | 0.42682  | 0.999883  |
| gene2589 | gene2589 | SACOL2603 | gi 57650036 ref NC_002951.2 :2662844-2663123 | MVR | M36C05 | OK     | 4.52567 | 7.29727 | 0.689227   | -0.674489 | 0.5      | 0.999883  |
| gene259  | gene259  | SACOL0269 | gi 57650036 ref NC_002951.2 :307972-308560   | MVR | M36C05 | NOTEST | 0.48167 | 0.85358 | 0.825475   | -0.61109  | 0.54114  | 1         |
| gene2590 | gene2590 | SACOL2605 | gi 57650036 ref NC_002951.2 :2663464-2664274 | MVR | M36C05 | OK     | 7.08439 | 51.7193 | 2.86799    | -4.03019  | 5.57E-05 | 0.0035381 |
| gene2591 | gene2591 | pyrD      | gi 57650036 ref NC_002951.2 :2664548-2665613 | MVR | M36C05 | OK     | 6.25821 | 2.54947 | -1.29555   | 1.81282   | 0.06986  | 0.522414  |
| gene2592 | gene2592 | SACOL2607 | gi 57650036 ref NC_002951.2 :2665767-2666043 | MVR | M36C05 | OK     | 63.6441 | 40.0039 | -0.669889  | 0.959323  | 0.3374   | 0.999883  |
| gene2593 | gene2593 | SACOL2608 | gi 57650036 ref NC_002951.2 :2666228-2666951 | MVR | M36C05 | OK     | 28.7059 | 12.8691 | -1.15744   | 1.6916    | 0.09072  | 0.604003  |
| gene2594 | gene2594 | SACOL2609 | gi 57650036 ref NC_002951.2 :2667304-2667754 | MVR | M36C05 | OK     | 1760.64 | 1036.24 | -0.764734  | 0.819709  | 0.41238  | 0.999883  |
| gene2595 | gene2595 | SACOL2610 | gi 57650036 ref NC_002951.2 :2667834-2668422 | MVR | M36C05 | OK     | 13.4869 | 15.649  | 0.214518   | -0.312143 | 0.75493  | 0.999883  |
| gene2596 | gene2596 | SACOL2612 | gi 57650036 ref NC_002951.2 :2668554-2670237 | MVR | M36C05 | OK     | 7.17565 | 6.31733 | -0.183793  | 0.270106  | 0.78708  | 0.999883  |
| gene2597 | gene2597 | panD      | gi 57650036 ref NC_002951.2 :2670365-2670749 | MVR | M36C05 | OK     | 23.8318 | 19.0481 | -0.323242  | 0.460065  | 0.64547  | 0.999883  |
| gene2598 | gene2598 | panC      | gi 57650036 ref NC_002951.2 :2670750-2672413 | MVR | M36C05 | OK     | 18.9013 | 24.6992 | 0.385978   | -0.357754 | 0.72053  | 0.999883  |
| gene2599 | gene2599 | panB      | gi 57650036 ref NC_002951.2 :2670750-2672413 | MVR | M36C05 | OK     | 23.9783 | 32.0767 | 0.419799   | -0.4294   | 0.66763  | 0.999883  |
| gene26   | gene26   | SACOL0025 | gi 57650036 ref NC_002951.2 :33575-34055     | MVR | M36C05 | OK     | 44.3907 | 33.5158 | -0.405417  | 0.595375  | 0.55159  | 0.999883  |
| gene260  | gene260  | SACOL0270 | gi 57650036 ref NC_002951.2 :308702-309596   | MVR | M36C05 | OK     | 7.15659 | 8.74069 | 0.288475   | -0.419493 | 0.67486  | 0.999883  |
| gene2600 | gene2600 | SACOL2616 | gi 57650036 ref NC_002951.2 :2672485-2673346 | MVR | M36C05 | OK     | 15.8805 | 18.1884 | 0.195761   | -0.287229 | 0.77394  | 0.999883  |
| gene2601 | gene2601 | budA2     | gi 57650036 ref NC_002951.2 :2673431-2674136 | MVR | M36C05 | OK     | 32.089  | 16.8246 | -0.93151   | 1.36157   | 0.17333  | 0.821477  |
| gene2602 | gene2602 | ldh2      | gi 57650036 ref NC_002951.2 :2674413-2675373 | MVR | M36C05 | OK     | 11.3616 | 26.4091 | 1.21686    | -1.76669  | 0.07728  | 0.552795  |
| gene2603 | gene2603 | SACOL2619 | gi 57650036 ref NC_002951.2 :2676059-2677508 | MVR | M36C05 | OK     | 99.7356 | 280.475 | 1.49169    | -1.66871  | 0.09518  | 0.619969  |
| gene2604 | gene2604 | SACOL2620 | gi 57650036 ref NC_002951.2 :2677588-2678926 | MVR | M36C05 | OK     | 17.5872 | 101.811 | 2.53329    | -3.28573  | 0.00102  | 0.0348881 |
| gene2605 | gene2605 | SACOL2621 | gi 57650036 ref NC_002951.2 :2679183-2679600 | MVR | M36C05 | OK     | 3.59098 | 104.02  | 4.85634    | -5.94576  | 2.75E-09 | 7.66E-07  |
| gene2606 | gene2606 | fdaB      | gi 57650036 ref NC_002951.2 :2679722-2680613 | MVR | M36C05 | OK     | 168.673 | 550.663 | 1.70694    | -1.91014  | 0.05611  | 0.471519  |
| gene2607 | gene2607 | mqa2      | gi 57650036 ref NC_002951.2 :2680805-2682302 | MVR | M36C05 | OK     | 430.26  | 309.947 | -0.473185  | 0.492551  | 0.62233  | 0.999883  |
| gene2608 | gene2608 | SACOL2624 | gi 57650036 ref NC_002951.2 :2682986-2684585 | MVR | M36C05 | OK     | 88.2195 | 161.513 | 0.872481   | -0.999127 | 0.31773  | 0.999883  |
| gene2609 | gene2609 | SACOL2625 | gi 57650036 ref NC_002951.2 :2684778-2685222 | MVR | M36C05 | OK     | 20.5906 | 195.298 | 3.24561    | -4.47031  | 7.81E-06 | 0.0006893 |

|          |          |           |                                              |     |        |        |         |         |                         |           |          |          |
|----------|----------|-----------|----------------------------------------------|-----|--------|--------|---------|---------|-------------------------|-----------|----------|----------|
| gene261  | gene261  | SACOL0271 | gi 57650036 ref NC_002951.2 :309843-310137   | MVR | M36C05 | OK     | 649.035 | 1084.18 | 0.740233                | -0.920012 | 0.35757  | 0.999883 |
| gene2610 | gene2610 | SACOL2626 | gi 57650036 ref NC_002951.2 :2685502-2685715 | MVR | M36C05 | OK     | 57.7298 | 27.7004 | -1.05941                | 1.33773   | 0.18099  | 0.828669 |
| gene2611 | gene2611 | betA      | gi 57650036 ref NC_002951.2 :2685992-2687702 | MVR | M36C05 | OK     | 65.1788 | 2.91968 | -4.48052                | 5.89181   | 3.82E-09 | 9.87E-07 |
| gene2612 | gene2612 | betB      | gi 57650036 ref NC_002951.2 :2687962-2689453 | MVR | M36C05 | OK     | 111.432 | 2.81761 | -5.30555                | 6.75942   | 1.39E-11 | 7.16E-09 |
| gene2613 | gene2613 | SACOL2629 | gi 57650036 ref NC_002951.2 :2689521-2689617 | MVR | M36C05 | NOTEST | 0       | 0       | 0                       | 0         | 1        | 1        |
| gene2614 | gene2614 | SACOL2630 | gi 57650036 ref NC_002951.2 :2689705-2690269 | MVR | M36C05 | OK     | 33.1671 | 10.0095 | -1.72838                | 2.49488   | 0.0126   | 0.192783 |
| gene2615 | gene2615 | SACOL2631 | gi 57650036 ref NC_002951.2 :2690456-2691143 | MVR | M36C05 | NOTEST | 0       | 0       | 0                       | 0         | 1        | 1        |
| gene2616 | gene2616 | cudT      | gi 57650036 ref NC_002951.2 :2691406-2693029 | MVR | M36C05 | OK     | 92.8101 | 3.40812 | -4.76723                | 6.15394   | 7.56E-10 | 3.04E-07 |
| gene2617 | gene2617 | nrdG      | gi 57650036 ref NC_002951.2 :2693547-2695931 | MVR | M36C05 | OK     | 16.9798 | 85.1893 | 2.32685                 | -1.73174  | 0.08332  | 0.574119 |
| gene2618 | gene2618 | nrdD      | gi 57650036 ref NC_002951.2 :2693547-2695931 | MVR | M36C05 | OK     | 7.80089 | 35.1131 | 2.1703                  | -2.38042  | 0.01729  | 0.237924 |
| gene2619 | gene2619 | SACOL2636 | gi 57650036 ref NC_002951.2 :2696177-2697548 | MVR | M36C05 | OK     | 1.22374 | 1.88277 | 0.621557                | -0.810784 | 0.41749  | 0.999883 |
| gene262  | gene262  | SACOL0272 | gi 57650036 ref NC_002951.2 :310220-313922   | MVR | M36C05 | OK     | 8.12979 | 5.48996 | -0.566424               | 0.766327  | 0.44348  | 0.999883 |
| gene2620 | gene2620 | SACOL2637 | gi 57650036 ref NC_002951.2 :2697869-2697965 | MVR | M36C05 | NOTEST | 0       | 0       | 0                       | 0         | 1        | 1        |
| gene2621 | gene2621 | SACOL2638 | gi 57650036 ref NC_002951.2 :2698040-2698646 | MVR | M36C05 | OK     | 11.6288 | 3.80647 | -1.61117                | 2.18313   | 0.02903  | 0.324174 |
| gene2622 | gene2622 | cysJ      | gi 57650036 ref NC_002951.2 :2698708-2700589 | MVR | M36C05 | OK     | 6.24775 | 3.99934 | -0.643575               | 0.944406  | 0.34496  | 0.999883 |
| gene2623 | gene2623 | SACOL2640 | gi 57650036 ref NC_002951.2 :2700783-2700876 | MVR | M36C05 | NOTEST | 0       | 0       | 0                       | 0         | 1        | 1        |
| gene2624 | gene2624 | gpxA2     | gi 57650036 ref NC_002951.2 :2700983-2701481 | MVR | M36C05 | OK     | 6.17395 | 12.2278 | 0.985893                | -1.33867  | 0.18068  | 0.828449 |
| gene2625 | gene2625 | SACOL2642 | gi 57650036 ref NC_002951.2 :2702175-2702289 | MVR | M36C05 | NOTEST | 0       | 0       | 0                       | 0         | 1        | 1        |
| gene2626 | gene2626 | SACOL2643 | gi 57650036 ref NC_002951.2 :2702904-2705666 | MVR | M36C05 | OK     | 8.72241 | 6.05805 | -0.525872               | 0.668623  | 0.50374  | 0.999883 |
| gene2627 | gene2627 | SACOL2644 | gi 57650036 ref NC_002951.2 :2702904-2705666 | MVR | M36C05 | OK     | 9.18642 | 5.0768  | -0.855583               | 0.585531  | 0.55819  | 0.999883 |
| gene2628 | gene2628 | nsaS      | gi 57650036 ref NC_002951.2 :2705764-2706652 | MVR | M36C05 | OK     | 12.8573 | 5.77114 | -1.15566                | 1.67565   | 0.09381  | 0.615061 |
| gene2629 | gene2629 | SACOL2646 | gi 57650036 ref NC_002951.2 :2706662-2707328 | MVR | M36C05 | OK     | 26.1887 | 12.5515 | -1.06108                | 1.55228   | 0.1206   | 0.689371 |
| gene263  | gene263  | SACOL0273 | gi 57650036 ref NC_002951.2 :310220-313922   | MVR | M36C05 | OK     | 10.6456 | 6.39165 | -0.735995               | 0.327503  | 0.74329  | 0.999883 |
| gene2630 | gene2630 | SACOL2647 | gi 57650036 ref NC_002951.2 :2707353-2707554 | MVR | M36C05 | OK     | 46.2431 | 13.9733 | -1.72657                | 1.85677   | 0.06334  | 0.504373 |
| gene2631 | gene2631 | SACOL2648 | gi 57650036 ref NC_002951.2 :2707751-2709176 | MVR | M36C05 | OK     | 2.24007 | 3.23948 | 0.532223                | -0.748138 | 0.45438  | 0.999883 |
| gene2632 | gene2632 | SACOL2649 | gi 57650036 ref NC_002951.2 :2709235-2709337 | MVR | M36C05 | OK     | 6008.4  | 0       | -1.79769e+3(-1.79769e+3 | 0.22252   | 0.89416  |          |
| gene2633 | gene2633 | SACOL2650 | gi 57650036 ref NC_002951.2 :2709458-2709914 | MVR | M36C05 | OK     | 22.0613 | 16.8117 | -0.392055               | 0.56647   | 0.57108  | 0.999883 |
| gene2634 | gene2634 | SACOL2651 | gi 57650036 ref NC_002951.2 :2710158-2710920 | MVR | M36C05 | OK     | 7.17274 | 7.85223 | 0.130577                | -0.187212 | 0.85149  | 0.999883 |
| gene2635 | gene2635 | clfB      | gi 57650036 ref NC_002951.2 :2711035-2713777 | MVR | M36C05 | OK     | 71.7098 | 130.089 | 0.85926                 | -0.945199 | 0.34456  | 0.999883 |
| gene2636 | gene2636 | SACOL2653 | gi 57650036 ref NC_002951.2 :2714126-2714813 | MVR | M36C05 | OK     | 43.3111 | 24.925  | -0.797144               | 1.1551    | 0.24805  | 0.922459 |
| gene2637 | gene2637 | arcC2     | gi 57650036 ref NC_002951.2 :2714929-2715871 | MVR | M36C05 | OK     | 22.8041 | 11.4444 | -0.994645               | 1.45201   | 0.1465   | 0.743774 |
| gene2638 | gene2638 | arcD      | gi 57650036 ref NC_002951.2 :2715887-2717318 | MVR | M36C05 | OK     | 12.356  | 9.93969 | -0.313944               | 0.458259  | 0.64677  | 0.999883 |
| gene2639 | gene2639 | arcB2     | gi 57650036 ref NC_002951.2 :2717408-2718419 | MVR | M36C05 | OK     | 7.57912 | 4.89493 | -0.630743               | 0.911572  | 0.36199  | 0.999883 |

|          |          |           |                                              |     |        |        |         |         |              |                   |          |           |
|----------|----------|-----------|----------------------------------------------|-----|--------|--------|---------|---------|--------------|-------------------|----------|-----------|
| gene264  | gene264  | SACOL0274 | gi 57650036 ref NC_002951.2 :310220-313922   | MVR | M36C05 | OK     | 2.23444 | 0       | -1.79769e+31 | -1.79769e+0.42293 | 0.999883 |           |
| gene2640 | gene2640 | arcA      | gi 57650036 ref NC_002951.2 :2718451-2719687 | MVR | M36C05 | OK     | 8.37944 | 2.55397 | -1.71411     | 2.43912           | 0.01472  | 0.210573  |
| gene2641 | gene2641 | SACOL2658 | gi 57650036 ref NC_002951.2 :2720033-2720483 | MVR | M36C05 | OK     | 2.05742 | 2.64798 | 0.364058     | -0.373502         | 0.70878  | 0.999883  |
| gene2642 | gene2642 | aur       | gi 57650036 ref NC_002951.2 :2720849-2722379 | MVR | M36C05 | OK     | 1.2987  | 1.16028 | -0.162599    | 0.21016           | 0.83354  | 0.999883  |
| gene2643 | gene2643 | isaB      | gi 57650036 ref NC_002951.2 :2722802-2723330 | MVR | M36C05 | NOTEST | 0       | 0.6733  | 1.79769e+30  | 1.79769e+0.06916  | 1        | 1         |
| gene2644 | gene2644 | SACOL2661 | gi 57650036 ref NC_002951.2 :2723587-2724046 | MVR | M36C05 | NOTEST | 0       | 0       | 0            | 0                 | 1        | 1         |
| gene2645 | gene2645 | SACOL2662 | gi 57650036 ref NC_002951.2 :2724285-2726160 | MVR | M36C05 | OK     | 4.95968 | 4.80325 | -0.0462362   | 0.067974          | 0.94581  | 0.999883  |
| gene2646 | gene2646 | SACOL2663 | gi 57650036 ref NC_002951.2 :2726236-2728189 | MVR | M36C05 | OK     | 4.73597 | 5.28098 | 0.157146     | -0.231059         | 0.81727  | 0.999883  |
| gene2647 | gene2647 | manA2     | gi 57650036 ref NC_002951.2 :2728202-2729141 | MVR | M36C05 | OK     | 6.62456 | 9.10322 | 0.458552     | -0.667567         | 0.50441  | 0.999883  |
| gene2648 | gene2648 | SACOL2665 | gi 57650036 ref NC_002951.2 :2729252-2732234 | MVR | M36C05 | OK     | 17.2212 | 10.8129 | -0.671426    | 0.907097          | 0.36436  | 0.999883  |
| gene2649 | gene2649 | SACOL2666 | gi 57650036 ref NC_002951.2 :2732444-2734304 | MVR | M36C05 | OK     | 37.0381 | 72.7665 | 0.974265     | -1.20175          | 0.22946  | 0.898537  |
| gene265  | gene265  | SACOL0275 | gi 57650036 ref NC_002951.2 :313934-315269   | MVR | M36C05 | OK     | 4.84297 | 1.74828 | -1.46996     | 2.04247           | 0.0411   | 0.395011  |
| gene2650 | gene2650 | SACOL2667 | gi 57650036 ref NC_002951.2 :2734570-2735131 | MVR | M36C05 | OK     | 75.5907 | 120.502 | 0.672781     | -0.920224         | 0.35746  | 0.999883  |
| gene2651 | gene2651 | SACOL2668 | gi 57650036 ref NC_002951.2 :2735298-2737206 | MVR | M36C05 | OK     | 22.4717 | 56.1377 | 1.32086      | -1.69092          | 0.09085  | 0.604318  |
| gene2652 | gene2652 | SACOL2669 | gi 57650036 ref NC_002951.2 :2737447-2740307 | MVR | M36C05 | OK     | 17.2104 | 50.1249 | 1.54225      | -1.2334           | 0.21743  | 0.89416   |
| gene2653 | gene2653 | SACOL2670 | gi 57650036 ref NC_002951.2 :2737447-2740307 | MVR | M36C05 | OK     | 17.7506 | 69.3869 | 1.96679      | -1.84877          | 0.06449  | 0.508201  |
| gene2654 | gene2654 | SACOL2671 | gi 57650036 ref NC_002951.2 :2740324-2746753 | MVR | M36C05 | OK     | 12.3892 | 75.7456 | 2.61208      | -2.86918          | 0.00412  | 0.0948257 |
| gene2655 | gene2655 | SACOL2672 | gi 57650036 ref NC_002951.2 :2740324-2746753 | MVR | M36C05 | OK     | 3.57534 | 2.03147 | -0.815559    | 0.118677          | 0.90553  | 0.999883  |
| gene2656 | gene2656 | SACOL2673 | gi 57650036 ref NC_002951.2 :2740324-2746753 | MVR | M36C05 | OK     | 3.95709 | 2.2544  | -0.811693    | 0.167119          | 0.86728  | 0.999883  |
| gene2657 | gene2657 | SACOL2674 | gi 57650036 ref NC_002951.2 :2740324-2746753 | MVR | M36C05 | OK     | 3.69388 | 1.46533 | -1.33392     | 0.223173          | 0.8234   | 0.999883  |
| gene2658 | gene2658 | secY      | gi 57650036 ref NC_002951.2 :2746763-2747975 | MVR | M36C05 | OK     | 2.4269  | 0.65365 | -1.89253     | 2.26088           | 0.02377  | 0.292955  |
| gene2659 | gene2659 | SACOL2676 | gi 57650036 ref NC_002951.2 :2748104-2754890 | MVR | M36C05 | OK     | 8.18339 | 6.95877 | -0.233866    | 0.30737           | 0.75856  | 0.999883  |
| gene266  | gene266  | yukA      | gi 57650036 ref NC_002951.2 :315290-319730   | MVR | M36C05 | OK     | 4.06522 | 1.5851  | -1.35876     | 1.97834           | 0.04789  | 0.430141  |
| gene2660 | gene2660 | SACOL2677 | gi 57650036 ref NC_002951.2 :2755243-2755354 | MVR | M36C05 | NOTEST | 0       | 0       | 0            | 0                 | 1        | 1         |
| gene2661 | gene2661 | SACOL2678 | gi 57650036 ref NC_002951.2 :2755434-2756127 | MVR | M36C05 | OK     | 0.8726  | 2.46211 | 1.4965       | -1.5868           | 0.11256  | 0.665508  |
| gene2662 | gene2662 | SACOL2680 | gi 57650036 ref NC_002951.2 :2756807-2757110 | MVR | M36C05 | OK     | 3.67309 | 5.97231 | 0.701295     | -0.686299         | 0.49252  | 0.999883  |
| gene2663 | gene2663 | SACOL2681 | gi 57650036 ref NC_002951.2 :2757263-2757623 | MVR | M36C05 | OK     | 29.5052 | 634.983 | 4.42767      | -5.79037          | 7.02E-09 | 1.69E-06  |
| gene2664 | gene2664 | SACOL2682 | gi 57650036 ref NC_002951.2 :2757707-2758319 | MVR | M36C05 | OK     | 4.82076 | 30.2754 | 2.65081      | -3.67702          | 0.00024  | 0.0111617 |
| gene2665 | gene2665 | SACOL2683 | gi 57650036 ref NC_002951.2 :2758397-2758874 | MVR | M36C05 | OK     | 2.99387 | 2.39135 | -0.324188    | 0.354527          | 0.72294  | 0.999883  |
| gene2666 | gene2666 | SACOL2684 | gi 57650036 ref NC_002951.2 :2758876-2759377 | MVR | M36C05 | OK     | 3.36985 | 1.83424 | -0.877503    | 0.956306          | 0.33892  | 0.999883  |
| gene2667 | gene2667 | cap1C     | gi 57650036 ref NC_002951.2 :2759611-2761068 | MVR | M36C05 | OK     | 2.36456 | 1.74806 | -0.435816    | 0.407458          | 0.68367  | 0.999883  |
| gene2668 | gene2668 | cap1B     | gi 57650036 ref NC_002951.2 :2759611-2761068 | MVR | M36C05 | OK     | 3.11643 | 2.01446 | -0.629504    | 0.607307          | 0.54365  | 0.999883  |
| gene2669 | gene2669 | cap1A     | gi 57650036 ref NC_002951.2 :2761084-2761747 | MVR | M36C05 | NOTEST | 0.79901 | 0.71508 | -0.160127    | 0.143385          | 0.88599  | 1         |

|          |          |           |                                              |     |        |        |         |         |              |              |         |           |
|----------|----------|-----------|----------------------------------------------|-----|--------|--------|---------|---------|--------------|--------------|---------|-----------|
| gene267  | gene267  | SACOL0277 | gi 57650036 ref NC_002951.2 :319759-320152   | MVR | M36C05 | NOTEST | 0       | 0       | 0            | 0            | 1       | 1         |
| gene2670 | gene2670 | icaR      | gi 57650036 ref NC_002951.2 :2762595-2763156 | MVR | M36C05 | OK     | 33.1143 | 25.385  | -0.383476    | 0.563292     | 0.57324 | 0.999883  |
| gene2671 | gene2671 | icaA      | gi 57650036 ref NC_002951.2 :2763319-2766734 | MVR | M36C05 | OK     | 1.20999 | 1.59162 | 0.395504     | -0.280545    | 0.77906 | 0.999883  |
| gene2672 | gene2672 | icaD      | gi 57650036 ref NC_002951.2 :2763319-2766734 | MVR | M36C05 | OK     | 1.79294 | 0       | -1.79769e+30 | -1.79769e+30 | 0.30674 | 0.991033  |
| gene2673 | gene2673 | icaB      | gi 57650036 ref NC_002951.2 :2763319-2766734 | MVR | M36C05 | OK     | 1.3391  | 1.78681 | 0.416119     | -0.249912    | 0.80266 | 0.999883  |
| gene2674 | gene2674 | icaC      | gi 57650036 ref NC_002951.2 :2763319-2766734 | MVR | M36C05 | OK     | 4.52013 | 3.49435 | -0.371338    | 0.405289     | 0.68527 | 0.999883  |
| gene2675 | gene2675 | SACOL2693 | gi 57650036 ref NC_002951.2 :2767031-2767097 | MVR | M36C05 | OK     | 0       | #####   | 1.79769e+30  | 1.79769e+30  | 0.03514 | 0.35865   |
| gene2676 | gene2676 | geh       | gi 57650036 ref NC_002951.2 :2767124-2769167 | MVR | M36C05 | OK     | 61.9303 | 232.372 | 1.90772      | -2.12383     | 0.03368 | 0.351535  |
| gene2677 | gene2677 | SACOL2695 | gi 57650036 ref NC_002951.2 :2769887-2770100 | MVR | M36C05 | NOTEST | 0       | 0       | 0            | 0            | 1       | 1         |
| gene2678 | gene2678 | hisI      | gi 57650036 ref NC_002951.2 :2770259-2774476 | MVR | M36C05 | OK     | 4.00192 | 4.5883  | 0.197267     | -0.109808    | 0.91256 | 0.999883  |
| gene2679 | gene2679 | hisF      | gi 57650036 ref NC_002951.2 :2770259-2774476 | MVR | M36C05 | OK     | 4.59005 | 5.92082 | 0.367286     | -0.256678    | 0.79743 | 0.999883  |
| gene268  | gene268  | SACOL0278 | gi 57650036 ref NC_002951.2 :320167-321473   | MVR | M36C05 | NOTEST | 0       | 0       | 0            | 0            | 1       | 1         |
| gene2680 | gene2680 | hisA      | gi 57650036 ref NC_002951.2 :2770259-2774476 | MVR | M36C05 | OK     | 6.44211 | 7.21052 | 0.162571     | -0.123613    | 0.90162 | 0.999883  |
| gene2681 | gene2681 | hisH      | gi 57650036 ref NC_002951.2 :2770259-2774476 | MVR | M36C05 | OK     | 3.1277  | 4.36944 | 0.482347     | -0.231748    | 0.81673 | 0.999883  |
| gene2682 | gene2682 | hisB      | gi 57650036 ref NC_002951.2 :2770259-2774476 | MVR | M36C05 | OK     | 2.30462 | 1.74778 | -0.399008    | 0.141036     | 0.88784 | 0.999883  |
| gene2683 | gene2683 | SACOL2701 | gi 57650036 ref NC_002951.2 :2770259-2774476 | MVR | M36C05 | OK     | 3.47908 | 2.1675  | -0.682677    | 0.412894     | 0.67969 | 0.999883  |
| gene2684 | gene2684 | hisD      | gi 57650036 ref NC_002951.2 :2774491-2776349 | MVR | M36C05 | OK     | 2.60428 | 1.35589 | -0.941638    | 1.10594      | 0.26875 | 0.952424  |
| gene2685 | gene2685 | hisG      | gi 57650036 ref NC_002951.2 :2774491-2776349 | MVR | M36C05 | OK     | 2.09293 | 1.32992 | -0.654188    | 0.448464     | 0.65382 | 0.999883  |
| gene2686 | gene2686 | hisZ      | gi 57650036 ref NC_002951.2 :2776366-2777185 | MVR | M36C05 | OK     | 2.84988 | 2.31665 | -0.298858    | 0.383839     | 0.7011  | 0.999883  |
| gene2687 | gene2687 | SACOL2705 | gi 57650036 ref NC_002951.2 :2777489-2778614 | MVR | M36C05 | OK     | 19.6018 | 13.4693 | -0.541309    | 0.787        | 0.43128 | 0.999883  |
| gene2688 | gene2688 | SACOL2706 | gi 57650036 ref NC_002951.2 :2778731-2779229 | MVR | M36C05 | OK     | 1.49026 | 2.9643  | 0.992125     | -1.02537     | 0.30519 | 0.990872  |
| gene2689 | gene2689 | SACOL2707 | gi 57650036 ref NC_002951.2 :2779275-2781818 | MVR | M36C05 | OK     | 2.20469 | 4.69751 | 1.09132      | -0.865849    | 0.38657 | 0.999883  |
| gene269  | gene269  | SACOL0279 | gi 57650036 ref NC_002951.2 :320167-321473   | MVR | M36C05 | NOTEST | 0       | 0       | 0            | 0            | 1       | 1         |
| gene2690 | gene2690 | SACOL2708 | gi 57650036 ref NC_002951.2 :2779275-2781818 | MVR | M36C05 | OK     | 2.04255 | 4.73506 | 1.21301      | -1.47489     | 0.14024 | 0.736447  |
| gene2691 | gene2691 | SACOL2709 | gi 57650036 ref NC_002951.2 :2781870-2782425 | MVR | M36C05 | OK     | 2.11801 | 9.64162 | 2.18656      | -2.67174     | 0.00755 | 0.140745  |
| gene2692 | gene2692 | SACOL2710 | gi 57650036 ref NC_002951.2 :2782453-2783302 | MVR | M36C05 | OK     | 2.99381 | 13.0866 | 2.12803      | -2.95799     | 0.0031  | 0.0795967 |
| gene2693 | gene2693 | SACOL2711 | gi 57650036 ref NC_002951.2 :2783681-2784197 | MVR | M36C05 | OK     | 159.522 | 582.861 | 1.86939      | -2.27384     | 0.02298 | 0.288469  |
| gene2694 | gene2694 | drp35     | gi 57650036 ref NC_002951.2 :2784345-2785317 | MVR | M36C05 | OK     | 5.08157 | 8.28512 | 0.70525      | -1.01874     | 0.30833 | 0.991033  |
| gene2695 | gene2695 | SACOL2713 | gi 57650036 ref NC_002951.2 :2785560-2786517 | MVR | M36C05 | OK     | 37.7346 | 12.8199 | -1.5575      | 2.22949      | 0.02578 | 0.304771  |
| gene2696 | gene2696 | pcp       | gi 57650036 ref NC_002951.2 :2786668-2787307 | MVR | M36C05 | OK     | 5.63448 | 6.7882  | 0.268747     | -0.3704      | 0.71109 | 0.999883  |
| gene2697 | gene2697 | SACOL2715 | gi 57650036 ref NC_002951.2 :2787425-2788521 | MVR | M36C05 | NOTEST | 0       | 0       | 0            | 0            | 1       | 1         |
| gene2698 | gene2698 | SACOL2716 | gi 57650036 ref NC_002951.2 :2787425-2788521 | MVR | M36C05 | NOTEST | 0       | 0       | 0            | 0            | 1       | 1         |
| gene2699 | gene2699 | SACOL2717 | gi 57650036 ref NC_002951.2 :2788687-2789152 | MVR | M36C05 | OK     | 10.1447 | 18.7434 | 0.885652     | -1.24632     | 0.21265 | 0.892138  |

|          |          |           |                                              |     |        |        |         |         |             |             |          |           |
|----------|----------|-----------|----------------------------------------------|-----|--------|--------|---------|---------|-------------|-------------|----------|-----------|
| gene27   | gene27   | SACOL0026 | gi 57650036 ref NC_002951.2 :34371-35667     | MVR | M36C05 | NOTEST | 0       | 0       | 0           | 0           | 1        | 1         |
| gene270  | gene270  | SACOL0280 | gi 57650036 ref NC_002951.2 :320167-321473   | MVR | M36C05 | NOTEST | 0       | 0       | 0           | 0           | 1        | 1         |
| gene2700 | gene2700 | SACOL2718 | gi 57650036 ref NC_002951.2 :2789389-2790808 | MVR | M36C05 | OK     | 10.082  | 7.86731 | -0.357833   | 0.525138    | 0.59949  | 0.999883  |
| gene2701 | gene2701 | rarD      | gi 57650036 ref NC_002951.2 :2791220-2792129 | MVR | M36C05 | OK     | 17.7559 | 34.8444 | 0.972624    | -1.39758    | 0.16224  | 0.788002  |
| gene2702 | gene2702 | SACOL2720 | gi 57650036 ref NC_002951.2 :2792353-2792929 | MVR | M36C05 | OK     | 1.1621  | 15.2685 | 3.71575     | -4.17087    | 3.03E-05 | 0.0020429 |
| gene2703 | gene2703 | nixA      | gi 57650036 ref NC_002951.2 :2793057-2794110 | MVR | M36C05 | OK     | 5.50226 | 13.8317 | 1.32989     | -1.93393    | 0.05312  | 0.456582  |
| gene2704 | gene2704 | SACOL2722 | gi 57650036 ref NC_002951.2 :2794352-2795147 | MVR | M36C05 | NOTEST | 0.3072  | 0.92701 | 1.59341     | -1.23531    | 0.21672  | 1         |
| gene2705 | gene2705 | SACOL2723 | gi 57650036 ref NC_002951.2 :2795280-2795793 | MVR | M36C05 | OK     | 7.2705  | 85.0216 | 3.5477      | -4.86433    | 1.15E-06 | 0.0001279 |
| gene2706 | gene2706 | SACOL2724 | gi 57650036 ref NC_002951.2 :2796075-2798704 | MVR | M36C05 | OK     | 2.18574 | 3.55249 | 0.70071     | -0.567439   | 0.57042  | 0.999883  |
| gene2707 | gene2707 | SACOL2725 | gi 57650036 ref NC_002951.2 :2796075-2798704 | MVR | M36C05 | OK     | 1.97669 | 1.83576 | -0.106706   | 0.125795    | 0.89989  | 0.999883  |
| gene2708 | gene2708 | SACOL2726 | gi 57650036 ref NC_002951.2 :2798796-2798988 | MVR | M36C05 | NOTEST | 0       | 0       | 0           | 0           | 1        | 1         |
| gene2709 | gene2709 | SACOL2727 | gi 57650036 ref NC_002951.2 :2798999-2799536 | MVR | M36C05 | OK     | 1.86591 | 1.3106  | -0.509649   | 0.510823    | 0.60948  | 0.999883  |
| gene271  | gene271  | SACOL0281 | gi 57650036 ref NC_002951.2 :321482-323327   | MVR | M36C05 | NOTEST | 0       | 0       | 0           | 0           | 1        | 1         |
| gene2710 | gene2710 | SACOL2728 | gi 57650036 ref NC_002951.2 :2799595-2800093 | MVR | M36C05 | OK     | 3.40632 | 1.85269 | -0.878592   | 0.957493    | 0.33832  | 0.999883  |
| gene2711 | gene2711 | SACOL2729 | gi 57650036 ref NC_002951.2 :2800171-2800522 | MVR | M36C05 | OK     | 3.03664 | 0       | -1.79769e+3 | -1.79769e+0 | 0.02679  | 0.309278  |
| gene2712 | gene2712 | SACOL2730 | gi 57650036 ref NC_002951.2 :2800550-2800742 | MVR | M36C05 | NOTEST | 0       | 0       | 0           | 0           | 1        | 1         |
| gene2713 | gene2713 | SACOL2731 | gi 57650036 ref NC_002951.2 :2801134-2801335 | MVR | M36C05 | OK     | 2065.53 | 754.558 | -1.45281    | 1.96799     | 0.04907  | 0.435378  |
| gene2714 | gene2714 | SACOL2732 | gi 57650036 ref NC_002951.2 :2801461-2802031 | MVR | M36C05 | OK     | 6.24863 | 9.25019 | 0.565942    | -0.780756   | 0.43495  | 0.999883  |
| gene2715 | gene2715 | SACOL2733 | gi 57650036 ref NC_002951.2 :2802290-2802671 | MVR | M36C05 | OK     | 9.0441  | 9.67459 | 0.0972225   | -0.125449   | 0.90017  | 0.999883  |
| gene2716 | gene2716 | SACOL2734 | gi 57650036 ref NC_002951.2 :2802753-2803107 | MVR | M36C05 | OK     | 4.25552 | 4.22146 | -0.0115935  | 0.012275    | 0.99021  | 0.999883  |
| gene2717 | gene2717 | SACOL2735 | gi 57650036 ref NC_002951.2 :2803560-2804400 | MVR | M36C05 | OK     | 45.9427 | 34.4697 | -0.414504   | 0.58368     | 0.55944  | 0.999883  |
| gene2718 | gene2718 | gidB      | gi 57650036 ref NC_002951.2 :2804442-2807039 | MVR | M36C05 | OK     | 33.9481 | 30.7672 | -0.14194    | 0.086562    | 0.93102  | 0.999883  |
| gene2719 | gene2719 | gidA      | gi 57650036 ref NC_002951.2 :2804442-2807039 | MVR | M36C05 | OK     | 34.5841 | 30.5413 | -0.179346   | 0.198742    | 0.84247  | 0.999883  |
| gene272  | gene272  | SACOL0282 | gi 57650036 ref NC_002951.2 :323337-323829   | MVR | M36C05 | NOTEST | 0.2176  | 0       | -1.79769e+3 | -1.79769e+0 | 0.22252  | 1         |
| gene2720 | gene2720 | trmE      | gi 57650036 ref NC_002951.2 :2807105-2808485 | MVR | M36C05 | OK     | 28.787  | 26.7181 | -0.107602   | 0.147798    | 0.8825   | 0.999883  |
| gene2721 | gene2721 | rnpA      | gi 57650036 ref NC_002951.2 :2808623-2808971 | MVR | M36C05 | OK     | 26.0972 | 16.7823 | -0.636955   | 0.887776    | 0.37466  | 0.999883  |
| gene2722 | gene2722 | rpmH      | gi 57650036 ref NC_002951.2 :2809097-2809235 | MVR | M36C05 | OK     | 3912.94 | 1201.95 | -1.70287    | 2.46142     | 0.01384  | 0.204544  |
| gene273  | gene273  | SACOL0283 | gi 57650036 ref NC_002951.2 :324036-324720   | MVR | M36C05 | NOTEST | 0       | 0       | 0           | 0           | 1        | 1         |
| gene274  | gene274  | SACOL0284 | gi 57650036 ref NC_002951.2 :324866-325478   | MVR | M36C05 | NOTEST | 0       | 0       | 0           | 0           | 1        | 1         |
| gene275  | gene275  | SACOL0285 | gi 57650036 ref NC_002951.2 :325613-325832   | MVR | M36C05 | OK     | 20.5288 | 25.0136 | 0.285063    | -0.329761   | 0.74158  | 0.999883  |
| gene276  | gene276  | SACOL0286 | gi 57650036 ref NC_002951.2 :325963-326464   | MVR | M36C05 | NOTEST | 0.84246 | 0       | -1.79769e+3 | -1.79769e+0 | 0.06333  | 1         |
| gene277  | gene277  | SACOL0287 | gi 57650036 ref NC_002951.2 :326474-326975   | MVR | M36C05 | NOTEST | 0       | 0       | 0           | 0           | 1        | 1         |
| gene278  | gene278  | SACOL0288 | gi 57650036 ref NC_002951.2 :326985-327481   | MVR | M36C05 | OK     | 1.71553 | 0.74608 | -1.20126    | 0.992335    | 0.32103  | 0.999883  |

|         |         |           |                                            |     |        |        |         |         |              |              |         |           |
|---------|---------|-----------|--------------------------------------------|-----|--------|--------|---------|---------|--------------|--------------|---------|-----------|
| gene279 | gene279 | SACOL0289 | gi 57650036 ref NC_002951.2 :327491-327983 | MVR | M36C05 | NOTEST | 0       | 0.37814 | 1.79769e+30  | 1.79769e+30  | 0.14732 | 1         |
| gene28  | gene28  | SACOL0027 | gi 57650036 ref NC_002951.2 :36081-36321   | MVR | M36C05 | NOTEST | 0       | 0       | 0            | 0            | 1       | 1         |
| gene280 | gene280 | SACOL0290 | gi 57650036 ref NC_002951.2 :328192-328876 | MVR | M36C05 | NOTEST | 0       | 0       | 0            | 0            | 1       | 1         |
| gene281 | gene281 | SACOL0291 | gi 57650036 ref NC_002951.2 :329461-329962 | MVR | M36C05 | NOTEST | 0       | 0.36685 | 1.79769e+30  | 1.79769e+30  | 0.14732 | 1         |
| gene282 | gene282 | SACOL0292 | gi 57650036 ref NC_002951.2 :329973-330474 | MVR | M36C05 | NOTEST | 0       | 0       | 0            | 0            | 1       | 1         |
| gene283 | gene283 | SACOL0293 | gi 57650036 ref NC_002951.2 :330484-330985 | MVR | M36C05 | OK     | 1.68492 | 0.7337  | -1.19943     | 0.990826     | 0.32177 | 0.999883  |
| gene284 | gene284 | SACOL0294 | gi 57650036 ref NC_002951.2 :330995-331496 | MVR | M36C05 | OK     | 0.21062 | 1.10054 | 2.38553      | -1.1635      | 0.24463 | 0.918242  |
| gene285 | gene285 | SACOL0295 | gi 57650036 ref NC_002951.2 :331506-332007 | MVR | M36C05 | NOTEST | 0       | 0       | 0            | 0            | 1       | 1         |
| gene286 | gene286 | SACOL0296 | gi 57650036 ref NC_002951.2 :332017-332518 | MVR | M36C05 | NOTEST | 0       | 0.7337  | 1.79769e+30  | 1.79769e+30  | 0.06916 | 1         |
| gene287 | gene287 | SACOL0297 | gi 57650036 ref NC_002951.2 :332528-333017 | MVR | M36C05 | NOTEST | 0.22003 | 0       | -1.79769e+30 | -1.79769e+30 | 0.22252 | 1         |
| gene288 | gene288 | SACOL0299 | gi 57650036 ref NC_002951.2 :333639-334014 | MVR | M36C05 | OK     | 7.86354 | 6.24339 | -0.33285     | 0.405914     | 0.68481 | 0.999883  |
| gene289 | gene289 | SACOL0300 | gi 57650036 ref NC_002951.2 :334166-334565 | MVR | M36C05 | OK     | 33.7713 | 17.6655 | -0.934864    | 1.34519      | 0.17856 | 0.821737  |
| gene29  | gene29  | SACOL0028 | gi 57650036 ref NC_002951.2 :36352-37027   | MVR | M36C05 | OK     | 198.073 | 211.881 | 0.0972248    | -0.118705    | 0.90551 | 0.999883  |
| gene290 | gene290 | SACOL0301 | gi 57650036 ref NC_002951.2 :334780-335626 | MVR | M36C05 | OK     | 4.70038 | 18.9528 | 2.01156      | -2.87251     | 0.00407 | 0.0947611 |
| gene291 | gene291 | brnQ2     | gi 57650036 ref NC_002951.2 :335841-337149 | MVR | M36C05 | OK     | 33.8817 | 17.4116 | -0.960455    | 1.33949      | 0.18041 | 0.828444  |
| gene292 | gene292 | SACOL0303 | gi 57650036 ref NC_002951.2 :337732-338623 | MVR | M36C05 | OK     | 9.5558  | 21.0688 | 1.14066      | -1.66548     | 0.09582 | 0.622468  |
| gene293 | gene293 | SACOL0305 | gi 57650036 ref NC_002951.2 :338871-339921 | MVR | M36C05 | OK     | 28.6024 | 173.313 | 2.59917      | -3.29774     | 0.00097 | 0.0339119 |
| gene294 | gene294 | SACOL0306 | gi 57650036 ref NC_002951.2 :339933-340611 | MVR | M36C05 | OK     | 48.5474 | 260.877 | 2.42591      | -3.12001     | 0.00181 | 0.0538586 |
| gene295 | gene295 | pfoR      | gi 57650036 ref NC_002951.2 :340818-341850 | MVR | M36C05 | OK     | 96.3306 | 127.498 | 0.404414     | -0.496141    | 0.6198  | 0.999883  |
| gene296 | gene296 | SACOL0308 | gi 57650036 ref NC_002951.2 :342192-344209 | MVR | M36C05 | OK     | 2.679   | 1.07979 | -1.31095     | 1.11813      | 0.26351 | 0.945272  |
| gene297 | gene297 | SACOL0309 | gi 57650036 ref NC_002951.2 :342192-344209 | MVR | M36C05 | OK     | 3.09085 | 3.65589 | 0.242216     | -0.262565    | 0.79289 | 0.999883  |
| gene298 | gene298 | SACOL0310 | gi 57650036 ref NC_002951.2 :344219-345440 | MVR | M36C05 | OK     | 2.405   | 1.72768 | -0.477194    | 0.637751     | 0.52364 | 0.999883  |
| gene299 | gene299 | SACOL0311 | gi 57650036 ref NC_002951.2 :345544-347077 | MVR | M36C05 | OK     | 6.38926 | 5.54025 | -0.205698    | 0.302272     | 0.76245 | 0.999883  |
| gene3   | gene3   | recF      | gi 57650036 ref NC_002951.2 :3696-5051     | MVR | M36C05 | OK     | 177.744 | 188.273 | 0.0830288    | -0.086821    | 0.93081 | 0.999883  |
| gene30  | gene30  | SACOL0029 | gi 57650036 ref NC_002951.2 :37284-37452   | MVR | M36C05 | OK     | 51.9427 | 67.6104 | 0.380322     | -0.415617    | 0.67769 | 0.999883  |
| gene300 | gene300 | nanA      | gi 57650036 ref NC_002951.2 :347116-347998 | MVR | M36C05 | OK     | 3.91013 | 5.49853 | 0.491831     | -0.688258    | 0.49129 | 0.999883  |
| gene301 | gene301 | SACOL0313 | gi 57650036 ref NC_002951.2 :348155-349016 | MVR | M36C05 | OK     | 8.35334 | 14.8511 | 0.830143     | -1.2137      | 0.22486 | 0.89446   |
| gene302 | gene302 | SACOL0314 | gi 57650036 ref NC_002951.2 :349293-350094 | MVR | M36C05 | OK     | 24.7259 | 44.6023 | 0.851095     | -1.21534     | 0.22424 | 0.89446   |
| gene303 | gene303 | SACOL0315 | gi 57650036 ref NC_002951.2 :350233-350902 | MVR | M36C05 | OK     | 9.59038 | 12.0005 | 0.323431     | -0.468093    | 0.63972 | 0.999883  |
| gene304 | gene304 | SACOL0316 | gi 57650036 ref NC_002951.2 :351028-352342 | MVR | M36C05 | OK     | 1.6633  | 1.88022 | 0.17685      | -0.234927    | 0.81427 | 0.999883  |
| gene305 | gene305 | SACOL0317 | gi 57650036 ref NC_002951.2 :352759-354694 | MVR | M36C05 | OK     | 6.08479 | 10.4175 | 0.775732     | -1.12918     | 0.25882 | 0.938582  |
| gene306 | gene306 | int       | gi 57650036 ref NC_002951.2 :354784-355990 | MVR | M36C05 | OK     | 2.38217 | 1.75347 | -0.442064    | 0.589971     | 0.55521 | 0.999883  |
| gene307 | gene307 | SACOL0319 | gi 57650036 ref NC_002951.2 :356183-356897 | MVR | M36C05 | OK     | 11.2159 | 17.3881 | 0.63256      | -0.925675    | 0.35462 | 0.999883  |



|         |         |           |                                            |     |        |        |         |         |             |             |         |          |
|---------|---------|-----------|--------------------------------------------|-----|--------|--------|---------|---------|-------------|-------------|---------|----------|
| gene308 | gene308 | SACOL0320 | gi 57650036 ref NC_002951.2 :356974-357202 | MVR | M36C05 | OK     | 15.0971 | 15.2389 | 0.0134874   | -0.014721   | 0.98826 | 0.999883 |
| gene309 | gene309 | SACOL0321 | gi 57650036 ref NC_002951.2 :357356-358076 | MVR | M36C05 | NOTEST | 0       | 0       | 0           | 0           | 1       | 1        |
| gene31  | gene31  | SACOL0030 | gi 57650036 ref NC_002951.2 :37549-37780   | MVR | M36C05 | NOTEST | 0       | 0       | 0           | 0           | 1       | 1        |
| gene310 | gene310 | SACOL0322 | gi 57650036 ref NC_002951.2 :358217-358436 | MVR | M36C05 | NOTEST | 0       | 0       | 0           | 0           | 1       | 1        |
| gene311 | gene311 | SACOL0323 | gi 57650036 ref NC_002951.2 :358450-358759 | MVR | M36C05 | NOTEST | 0       | 0       | 0           | 0           | 1       | 1        |
| gene312 | gene312 | SACOL0324 | gi 57650036 ref NC_002951.2 :358762-358915 | MVR | M36C05 | NOTEST | 0       | 0       | 0           | 0           | 1       | 1        |
| gene313 | gene313 | SACOL0325 | gi 57650036 ref NC_002951.2 :358915-359707 | MVR | M36C05 | NOTEST | 0       | 0       | 0           | 0           | 1       | 1        |
| gene314 | gene314 | SACOL0326 | gi 57650036 ref NC_002951.2 :359707-359932 | MVR | M36C05 | NOTEST | 0       | 0       | 0           | 0           | 1       | 1        |
| gene315 | gene315 | SACOL0327 | gi 57650036 ref NC_002951.2 :359971-360551 | MVR | M36C05 | NOTEST | 0       | 0       | 0           | 0           | 1       | 1        |
| gene316 | gene316 | SACOL0328 | gi 57650036 ref NC_002951.2 :359971-360551 | MVR | M36C05 | NOTEST | 0       | 0       | 0           | 0           | 1       | 1        |
| gene317 | gene317 | SACOL0329 | gi 57650036 ref NC_002951.2 :360604-361172 | MVR | M36C05 | NOTEST | 0       | 0       | 0           | 0           | 1       | 1        |
| gene318 | gene318 | SACOL0330 | gi 57650036 ref NC_002951.2 :360604-361172 | MVR | M36C05 | NOTEST | 0       | 0       | 0           | 0           | 1       | 1        |
| gene319 | gene319 | SACOL0331 | gi 57650036 ref NC_002951.2 :361219-361640 | MVR | M36C05 | NOTEST | 0       | 0       | 0           | 0           | 1       | 1        |
| gene32  | gene32  | SACOL0031 | gi 57650036 ref NC_002951.2 :38328-39072   | MVR | M36C05 | OK     | 81.2926 | 140.954 | 0.794028    | -1.02608    | 0.30486 | 0.990233 |
| gene320 | gene320 | SACOL0332 | gi 57650036 ref NC_002951.2 :361219-361640 | MVR | M36C05 | NOTEST | 0       | 0       | 0           | 0           | 1       | 1        |
| gene321 | gene321 | SACOL0333 | gi 57650036 ref NC_002951.2 :361694-361958 | MVR | M36C05 | OK     | 3.50431 | 7.02445 | 1.00325     | -0.85826    | 0.39075 | 0.999883 |
| gene322 | gene322 | SACOL0334 | gi 57650036 ref NC_002951.2 :361970-362132 | MVR | M36C05 | OK     | 0       | 10.5757 | 1.79769e+30 | 1.79769e+30 | 0.14732 | 0.743774 |
| gene323 | gene323 | SACOL0335 | gi 57650036 ref NC_002951.2 :362221-362539 | MVR | M36C05 | NOTEST | 0       | 0.89032 | 1.79769e+30 | 1.79769e+30 | 0.14732 | 1        |
| gene324 | gene324 | SACOL0336 | gi 57650036 ref NC_002951.2 :362543-362804 | MVR | M36C05 | OK     | 0       | 2.89837 | 1.79769e+30 | 1.79769e+30 | 0.06916 | 0.522414 |
| gene325 | gene325 | SACOL0337 | gi 57650036 ref NC_002951.2 :362813-364070 | MVR | M36C05 | NOTEST | 0       | 0       | 0           | 0           | 1       | 1        |
| gene326 | gene326 | SACOL0338 | gi 57650036 ref NC_002951.2 :362813-364070 | MVR | M36C05 | NOTEST | 0       | 0       | 0           | 0           | 1       | 1        |
| gene327 | gene327 | ssb1      | gi 57650036 ref NC_002951.2 :362813-364070 | MVR | M36C05 | NOTEST | 0       | 0.50064 | 1.79769e+30 | 1.79769e+30 | 0.2187  | 1        |
| gene328 | gene328 | SACOL0340 | gi 57650036 ref NC_002951.2 :364083-367357 | MVR | M36C05 | OK     | 16.598  | 50.7237 | 1.61165     | -1.92128    | 0.0547  | 0.462964 |
| gene329 | gene329 | SACOL0341 | gi 57650036 ref NC_002951.2 :364083-367357 | MVR | M36C05 | OK     | 1.82404 | 2.38613 | 0.387535    | -0.132338   | 0.89472 | 0.999883 |
| gene33  | gene33  | maoC      | gi 57650036 ref NC_002951.2 :39168-39597   | MVR | M36C05 | OK     | 29.387  | 17.8081 | -0.722641   | 1.04572     | 0.29569 | 0.978474 |
| gene330 | gene330 | SACOL0342 | gi 57650036 ref NC_002951.2 :364083-367357 | MVR | M36C05 | OK     | 4.17551 | 3.45578 | -0.272942   | 0.06083     | 0.95149 | 0.999883 |
| gene331 | gene331 | SACOL0343 | gi 57650036 ref NC_002951.2 :364083-367357 | MVR | M36C05 | OK     | 2.98733 | 3.91468 | 0.390038    | -0.225245   | 0.82179 | 0.999883 |
| gene332 | gene332 | SACOL0344 | gi 57650036 ref NC_002951.2 :364083-367357 | MVR | M36C05 | OK     | 0       | 7.88874 | 1.79769e+30 | 1.79769e+30 | 0.38714 | 0.999883 |
| gene333 | gene333 | SACOL0345 | gi 57650036 ref NC_002951.2 :367359-367581 | MVR | M36C05 | OK     | 13.541  | 50.0644 | 1.88645     | -2.16885    | 0.03009 | 0.330484 |
| gene334 | gene334 | SACOL0346 | gi 57650036 ref NC_002951.2 :367590-368417 | MVR | M36C05 | NOTEST | 0       | 0       | 0           | 0           | 1       | 1        |
| gene335 | gene335 | SACOL0347 | gi 57650036 ref NC_002951.2 :367590-368417 | MVR | M36C05 | OK     | 1.58902 | 3.21821 | 1.01812     | -0.924222   | 0.35537 | 0.999883 |
| gene336 | gene336 | SACOL0348 | gi 57650036 ref NC_002951.2 :368421-368607 | MVR | M36C05 | NOTEST | 0       | 0       | 0           | 0           | 1       | 1        |
| gene337 | gene337 | SACOL0349 | gi 57650036 ref NC_002951.2 :368607-368865 | MVR | M36C05 | NOTEST | 0       | 0       | 0           | 0           | 1       | 1        |

|         |         |           |                                            |     |        |        |         |         |              |              |         |          |
|---------|---------|-----------|--------------------------------------------|-----|--------|--------|---------|---------|--------------|--------------|---------|----------|
| gene338 | gene338 | SACOL0350 | gi 57650036 ref NC_002951.2 :368876-369233 | MVR | M36C05 | NOTEST | 0       | 0.69116 | 1.79769e+30  | 1.79769e+30  | 0.14732 | 1        |
| gene339 | gene339 | SACOL0351 | gi 57650036 ref NC_002951.2 :369236-369479 | MVR | M36C05 | OK     | 2.23444 | 3.55812 | 0.671205     | -0.406095    | 0.68467 | 0.999883 |
| gene34  | gene34  | mecA      | gi 57650036 ref NC_002951.2 :39642-41649   | MVR | M36C05 | OK     | 420.81  | 630.628 | 0.583621     | -0.597044    | 0.55048 | 0.999883 |
| gene340 | gene340 | SACOL0352 | gi 57650036 ref NC_002951.2 :369492-369699 | MVR | M36C05 | NOTEST | 0       | 0       | 0            | 0            | 1       | 1        |
| gene341 | gene341 | SACOL0353 | gi 57650036 ref NC_002951.2 :369701-370981 | MVR | M36C05 | OK     | 0.64554 | 1.63231 | 1.33833      | -0.315511    | 0.75237 | 0.999883 |
| gene342 | gene342 | SACOL0354 | gi 57650036 ref NC_002951.2 :369701-370981 | MVR | M36C05 | OK     | 23.8855 | 51.0765 | 1.09652      | -1.35269     | 0.17616 | 0.821477 |
| gene343 | gene343 | SACOL0355 | gi 57650036 ref NC_002951.2 :369701-370981 | MVR | M36C05 | OK     | 11.6736 | 13.3124 | 0.189513     | -0.12055     | 0.90405 | 0.999883 |
| gene344 | gene344 | SACOL0356 | gi 57650036 ref NC_002951.2 :369701-370981 | MVR | M36C05 | OK     | 3.62557 | 9.60596 | 1.40572      | -0.422355    | 0.67277 | 0.999883 |
| gene345 | gene345 | dut       | gi 57650036 ref NC_002951.2 :370985-371528 | MVR | M36C05 | OK     | 12.0848 | 27.6846 | 1.19589      | -1.73215     | 0.08325 | 0.574119 |
| gene346 | gene346 | SACOL0358 | gi 57650036 ref NC_002951.2 :371564-372307 | MVR | M36C05 | OK     | 11.7227 | 34.041  | 1.53797      | -1.2142      | 0.22467 | 0.89446  |
| gene347 | gene347 | SACOL0359 | gi 57650036 ref NC_002951.2 :371564-372307 | MVR | M36C05 | NOTEST | 0       | 0       | 0            | 0            | 1       | 1        |
| gene348 | gene348 | SACOL0360 | gi 57650036 ref NC_002951.2 :371564-372307 | MVR | M36C05 | OK     | 18.6451 | 39.3993 | 1.07937      | -0.982438    | 0.32588 | 0.999883 |
| gene349 | gene349 | SACOL0361 | gi 57650036 ref NC_002951.2 :371564-372307 | MVR | M36C05 | OK     | 0       | 15.7499 | 1.79769e+30  | 1.79769e+30  | 0.29145 | 0.975616 |
| gene35  | gene35  | mecR1     | gi 57650036 ref NC_002951.2 :41748-44481   | MVR | M36C05 | OK     | 115.116 | 109.295 | -0.0748612   | 0.092372     | 0.9264  | 0.999883 |
| gene350 | gene350 | SACOL0362 | gi 57650036 ref NC_002951.2 :372374-372882 | MVR | M36C05 | OK     | 0       | 3.49332 | 1.79769e+30  | 1.79769e+30  | 0.2187  | 0.89416  |
| gene351 | gene351 | SACOL0363 | gi 57650036 ref NC_002951.2 :372374-372882 | MVR | M36C05 | OK     | 3.47045 | 3.58203 | 0.045656     | -0.04303     | 0.96568 | 0.999883 |
| gene352 | gene352 | SACOL0364 | gi 57650036 ref NC_002951.2 :372894-373332 | MVR | M36C05 | OK     | 1.62682 | 1.85338 | 0.18811      | -0.175601    | 0.86061 | 0.999883 |
| gene353 | gene353 | SACOL0365 | gi 57650036 ref NC_002951.2 :373488-373803 | MVR | M36C05 | NOTEST | 0.55737 | 0.90974 | 0.706828     | -0.302393    | 0.76235 | 1        |
| gene354 | gene354 | SACOL0366 | gi 57650036 ref NC_002951.2 :373931-375918 | MVR | M36C05 | OK     | 4.78118 | 14.5904 | 1.60958      | -0.941071    | 0.34667 | 0.999883 |
| gene355 | gene355 | SACOL0367 | gi 57650036 ref NC_002951.2 :373931-375918 | MVR | M36C05 | OK     | 1.4343  | 5.54048 | 1.94966      | -2.50933     | 0.0121  | 0.187953 |
| gene356 | gene356 | SACOL0368 | gi 57650036 ref NC_002951.2 :375922-377918 | MVR | M36C05 | OK     | 13.137  | 28.7553 | 1.13019      | -1.49516     | 0.13487 | 0.729547 |
| gene357 | gene357 | SACOL0369 | gi 57650036 ref NC_002951.2 :375922-377918 | MVR | M36C05 | OK     | 3.72078 | 6.15026 | 0.725042     | -0.34928     | 0.72688 | 0.999883 |
| gene358 | gene358 | SACOL0370 | gi 57650036 ref NC_002951.2 :377929-379093 | MVR | M36C05 | OK     | 5.91036 | 3.8886  | -0.603994    | 0.869943     | 0.38433 | 0.999883 |
| gene359 | gene359 | SACOL0371 | gi 57650036 ref NC_002951.2 :379161-379440 | MVR | M36C05 | OK     | 1.50856 | 1.21621 | -0.310773    | 0.162015     | 0.87129 | 0.999883 |
| gene36  | gene36  | SACOL0035 | gi 57650036 ref NC_002951.2 :41748-44481   | MVR | M36C05 | NOTEST | 0       | 0       | 0            | 0            | 1       | 1        |
| gene360 | gene360 | SACOL0372 | gi 57650036 ref NC_002951.2 :379451-380182 | MVR | M36C05 | OK     | 1.9573  | 0.80307 | -1.28527     | 0.599375     | 0.54892 | 0.999883 |
| gene361 | gene361 | SACOL0373 | gi 57650036 ref NC_002951.2 :379451-380182 | MVR | M36C05 | OK     | 1.61385 | 1.63231 | 0.0164034    | -0.012415    | 0.9901  | 0.999883 |
| gene362 | gene362 | SACOL0374 | gi 57650036 ref NC_002951.2 :380182-380578 | MVR | M36C05 | OK     | 2.99815 | 0.56021 | -2.42003     | 1.56839      | 0.11679 | 0.676159 |
| gene363 | gene363 | SACOL0375 | gi 57650036 ref NC_002951.2 :380612-381254 | MVR | M36C05 | OK     | 2.65719 | 5.99292 | 1.17336      | -1.50886     | 0.13134 | 0.718382 |
| gene364 | gene364 | SACOL0376 | gi 57650036 ref NC_002951.2 :381345-381801 | MVR | M36C05 | OK     | 12.0334 | 12.9321 | 0.103902     | -0.145373    | 0.88442 | 0.999883 |
| gene365 | gene365 | SACOL0377 | gi 57650036 ref NC_002951.2 :381858-382209 | MVR | M36C05 | OK     | 1.73522 | 0       | -1.79769e+30 | -1.79769e+30 | 0.06333 | 0.504373 |
| gene366 | gene366 | SACOL0378 | gi 57650036 ref NC_002951.2 :382250-382409 | MVR | M36C05 | OK     | 7.21565 | 11.9713 | 0.730382     | -0.312469    | 0.75468 | 0.999883 |
| gene367 | gene367 | SACOL0379 | gi 57650036 ref NC_002951.2 :382422-389447 | MVR | M36C05 | OK     | 2.06502 | 2.97412 | 0.526305     | -0.744448    | 0.45661 | 0.999883 |

|         |         |           |                                            |     |        |        |         |         |             |             |         |           |
|---------|---------|-----------|--------------------------------------------|-----|--------|--------|---------|---------|-------------|-------------|---------|-----------|
| gene368 | gene368 | SACOL0380 | gi 57650036 ref NC_002951.2 :382422-389447 | MVR | M36C05 | OK     | 0.97291 | 1.58842 | 0.707213    | -0.225887   | 0.82129 | 0.999883  |
| gene369 | gene369 | SACOL0381 | gi 57650036 ref NC_002951.2 :389455-391329 | MVR | M36C05 | OK     | 1.03212 | 1.27426 | 0.30405     | -0.377138   | 0.70607 | 0.999883  |
| gene37  | gene37  | SACOL0036 | gi 57650036 ref NC_002951.2 :41748-44481   | MVR | M36C05 | NOTEST | 0       | 0       | 0           | 0           | 1       | 1         |
| gene370 | gene370 | SACOL0382 | gi 57650036 ref NC_002951.2 :389455-391329 | MVR | M36C05 | OK     | 1.35361 | 1.09596 | -0.304616   | 0.097478    | 0.92235 | 0.999883  |
| gene371 | gene371 | SACOL0383 | gi 57650036 ref NC_002951.2 :391344-395267 | MVR | M36C05 | OK     | 1.69885 | 1.86797 | 0.136914    | -0.173013   | 0.86264 | 0.999883  |
| gene372 | gene372 | SACOL0384 | gi 57650036 ref NC_002951.2 :391344-395267 | MVR | M36C05 | NOTEST | 0.65873 | 0.348   | -0.920585   | 0.505853    | 0.61296 | 1         |
| gene373 | gene373 | SACOL0385 | gi 57650036 ref NC_002951.2 :391344-395267 | MVR | M36C05 | NOTEST | 0.68817 | 0.57723 | -0.253617   | 0.060104    | 0.95207 | 1         |
| gene374 | gene374 | SACOL0386 | gi 57650036 ref NC_002951.2 :391344-395267 | MVR | M36C05 | OK     | 0       | 9.41888 | 1.79769e+30 | 1.79769e+30 | 0.31165 | 0.993813  |
| gene375 | gene375 | SACOL0387 | gi 57650036 ref NC_002951.2 :395312-395612 | MVR | M36C05 | OK     | 1.25465 | 2.03801 | 0.699876    | -0.423442   | 0.67197 | 0.999883  |
| gene376 | gene376 | SACOL0388 | gi 57650036 ref NC_002951.2 :395747-396050 | MVR | M36C05 | NOTEST | 0       | 0       | 0           | 0           | 1       | 1         |
| gene377 | gene377 | SACOL0389 | gi 57650036 ref NC_002951.2 :396061-397516 | MVR | M36C05 | OK     | 1.56785 | 1.22966 | -0.350523   | 0.457249    | 0.64749 | 0.999883  |
| gene378 | gene378 | SACOL0390 | gi 57650036 ref NC_002951.2 :398285-398408 | MVR | M36C05 | NOTEST | 0       | 0       | 0           | 0           | 1       | 1         |
| gene379 | gene379 | SACOL0391 | gi 57650036 ref NC_002951.2 :398649-399477 | MVR | M36C05 | OK     | 1.45212 | 6.85021 | 2.23799     | -2.84194    | 0.00448 | 0.0988909 |
| gene38  | gene38  | SACOL0037 | gi 57650036 ref NC_002951.2 :44616-45123   | MVR | M36C05 | NOTEST | 0       | 0       | 0           | 0           | 1       | 1         |
| gene380 | gene380 | SACOL0392 | gi 57650036 ref NC_002951.2 :399549-400749 | MVR | M36C05 | OK     | 4.43409 | 4.96124 | 0.162062    | -0.234004   | 0.81498 | 0.999883  |
| gene381 | gene381 | SACOL0393 | gi 57650036 ref NC_002951.2 :400844-400937 | MVR | M36C05 | NOTEST | 0       | 0       | 0           | 0           | 1       | 1         |
| gene382 | gene382 | SACOL0394 | gi 57650036 ref NC_002951.2 :401050-402052 | MVR | M36C05 | OK     | 6.01315 | 7.28738 | 0.277279    | -0.402687   | 0.68718 | 0.999883  |
| gene383 | gene383 | SACOL0395 | gi 57650036 ref NC_002951.2 :402085-402418 | MVR | M36C05 | OK     | 7.33986 | 9.63679 | 0.3928      | -0.469964   | 0.63838 | 0.999883  |
| gene384 | gene384 | SACOL0396 | gi 57650036 ref NC_002951.2 :402418-405153 | MVR | M36C05 | OK     | 7.70152 | 6.24066 | -0.303445   | 0.278633    | 0.78053 | 0.999883  |
| gene385 | gene385 | SACOL0397 | gi 57650036 ref NC_002951.2 :402418-405153 | MVR | M36C05 | OK     | 6.16394 | 3.70075 | -0.736035   | 0.627015    | 0.53065 | 0.999883  |
| gene386 | gene386 | SACOL0398 | gi 57650036 ref NC_002951.2 :402418-405153 | MVR | M36C05 | OK     | 4.46456 | 2.54573 | -0.810441   | 0.609723    | 0.54205 | 0.999883  |
| gene387 | gene387 | SACOL0399 | gi 57650036 ref NC_002951.2 :405467-406493 | MVR | M36C05 | OK     | 11.9582 | 11.6144 | -0.0420896  | 0.06188     | 0.95066 | 0.999883  |
| gene388 | gene388 | ulaA      | gi 57650036 ref NC_002951.2 :406585-407932 | MVR | M36C05 | OK     | 4.11421 | 3.36383 | -0.290508   | 0.41706     | 0.67664 | 0.999883  |
| gene389 | gene389 | SACOL0401 | gi 57650036 ref NC_002951.2 :407946-408231 | MVR | M36C05 | OK     | 2.85475 | 1.15323 | -1.30769    | 0.783277    | 0.43347 | 0.999883  |
| gene39  | gene39  | SACOL0038 | gi 57650036 ref NC_002951.2 :45137-45449   | MVR | M36C05 | NOTEST | 0       | 0       | 0           | 0           | 1       | 1         |
| gene390 | gene390 | SACOL0402 | gi 57650036 ref NC_002951.2 :408232-408676 | MVR | M36C05 | OK     | 3.43177 | 3.61662 | 0.0756895   | -0.085619   | 0.93177 | 0.999883  |
| gene391 | gene391 | SACOL0403 | gi 57650036 ref NC_002951.2 :408680-410636 | MVR | M36C05 | OK     | 3.81599 | 2.7615  | -0.466603   | 0.67956     | 0.49678 | 0.999883  |
| gene392 | gene392 | SACOL0404 | gi 57650036 ref NC_002951.2 :410847-411267 | MVR | M36C05 | OK     | 37.749  | 9.01146 | -2.06661    | 2.88394     | 0.00393 | 0.0922789 |
| gene393 | gene393 | SACOL0405 | gi 57650036 ref NC_002951.2 :411373-412729 | MVR | M36C05 | OK     | 2.68656 | 1.43041 | -0.909331   | 1.22336     | 0.2212  | 0.89416   |
| gene394 | gene394 | SACOL0406 | gi 57650036 ref NC_002951.2 :412832-413273 | MVR | M36C05 | OK     | 11.5031 | 3.20351 | -1.8443     | 2.25847     | 0.02392 | 0.292955  |
| gene395 | gene395 | glpT      | gi 57650036 ref NC_002951.2 :413355-414714 | MVR | M36C05 | OK     | 49.1063 | 12.6501 | -1.95676    | 2.68229     | 0.00731 | 0.137988  |
| gene396 | gene396 | SACOL0408 | gi 57650036 ref NC_002951.2 :415021-415882 | MVR | M36C05 | OK     | 58.7487 | 174.375 | 1.56956     | -1.98576    | 0.04706 | 0.426221  |
| gene397 | gene397 | SACOL0409 | gi 57650036 ref NC_002951.2 :415961-417023 | MVR | M36C05 | OK     | 45.639  | 133.162 | 1.54484     | -1.95304    | 0.05081 | 0.443669  |

|         |         |           |                                            |     |        |        |         |         |           |           |         |           |
|---------|---------|-----------|--------------------------------------------|-----|--------|--------|---------|---------|-----------|-----------|---------|-----------|
| gene398 | gene398 | SACOL0410 | gi 57650036 ref NC_002951.2 :417036-417603 | MVR | M36C05 | OK     | 73.0815 | 149.816 | 1.03562   | -1.39985  | 0.16156 | 0.78575   |
| gene399 | gene399 | SACOL0411 | gi 57650036 ref NC_002951.2 :417662-418658 | MVR | M36C05 | OK     | 13.559  | 13.9921 | 0.0453624 | -0.066598 | 0.9469  | 0.999883  |
| gene4   | gene4   | gyrB      | gi 57650036 ref NC_002951.2 :5060-6995     | MVR | M36C05 | OK     | 118.277 | 64.4107 | -0.876801 | 1.01463   | 0.31029 | 0.993597  |
| gene40  | gene40  | SACOL0039 | gi 57650036 ref NC_002951.2 :45450-45886   | MVR | M36C05 | NOTEST | 0       | 0       | 0         | 0         | 1       | 1         |
| gene400 | gene400 | SACOL0412 | gi 57650036 ref NC_002951.2 :418755-419052 | MVR | M36C05 | OK     | 3.21554 | 4.17434 | 0.376489  | -0.336834 | 0.73624 | 0.999883  |
| gene401 | gene401 | SACOL0413 | gi 57650036 ref NC_002951.2 :419131-419677 | MVR | M36C05 | OK     | 17.9593 | 32.5502 | 0.857933  | -1.25529  | 0.20937 | 0.887248  |
| gene402 | gene402 | SACOL0414 | gi 57650036 ref NC_002951.2 :419944-423718 | MVR | M36C05 | OK     | 2.22402 | 1.17878 | -0.915878 | 0.523523  | 0.60061 | 0.999883  |
| gene403 | gene403 | SACOL0415 | gi 57650036 ref NC_002951.2 :419944-423718 | MVR | M36C05 | OK     | 2.96482 | 2.56886 | -0.206816 | 0.194056  | 0.84613 | 0.999883  |
| gene404 | gene404 | SACOL0416 | gi 57650036 ref NC_002951.2 :419944-423718 | MVR | M36C05 | OK     | 2.63175 | 1.38409 | -0.927081 | 0.879134  | 0.37933 | 0.999883  |
| gene405 | gene405 | SACOL0417 | gi 57650036 ref NC_002951.2 :423809-424466 | MVR | M36C05 | OK     | 11.4761 | 20.7685 | 0.855765  | -1.2493   | 0.21156 | 0.891171  |
| gene406 | gene406 | SACOL0418 | gi 57650036 ref NC_002951.2 :424527-424743 | MVR | M36C05 | OK     | 18.2654 | 36.8141 | 1.01115   | -1.17388  | 0.24044 | 0.911371  |
| gene407 | gene407 | SACOL0419 | gi 57650036 ref NC_002951.2 :424851-425241 | MVR | M36C05 | OK     | 12.3871 | 51.3738 | 2.05219   | -2.8773   | 0.00401 | 0.0939377 |
| gene408 | gene408 | SACOL0420 | gi 57650036 ref NC_002951.2 :425481-426395 | MVR | M36C05 | OK     | 10.3584 | 9.84983 | -0.072632 | 0.032063  | 0.97442 | 0.999883  |
| gene409 | gene409 | SACOL0421 | gi 57650036 ref NC_002951.2 :425481-426395 | MVR | M36C05 | OK     | 4.41476 | 5.79605 | 0.392733  | -0.513221 | 0.6078  | 0.999883  |
| gene41  | gene41  | SACOL0040 | gi 57650036 ref NC_002951.2 :45450-45886   | MVR | M36C05 | NOTEST | 0       | 0       | 0         | 0         | 1       | 1         |
| gene410 | gene410 | SACOL0422 | gi 57650036 ref NC_002951.2 :426419-427891 | MVR | M36C05 | OK     | 6.32902 | 7.71946 | 0.286517  | -0.131697 | 0.89522 | 0.999883  |
| gene411 | gene411 | SACOL0424 | gi 57650036 ref NC_002951.2 :426419-427891 | MVR | M36C05 | OK     | 77.4614 | 83.68   | 0.111406  | -0.141439 | 0.88752 | 0.999883  |
| gene412 | gene412 | SACOL0425 | gi 57650036 ref NC_002951.2 :428257-429391 | MVR | M36C05 | OK     | 9.63971 | 6.61067 | -0.544194 | 0.798031  | 0.42485 | 0.999883  |
| gene413 | gene413 | SACOL0426 | gi 57650036 ref NC_002951.2 :429929-431111 | MVR | M36C05 | OK     | 26.8601 | 11.7886 | -1.18807  | 1.70473   | 0.08824 | 0.597292  |
| gene414 | gene414 | SACOL0427 | gi 57650036 ref NC_002951.2 :431193-431946 | MVR | M36C05 | OK     | 11.0526 | 10.1748 | -0.119387 | 0.174141  | 0.86176 | 0.999883  |
| gene415 | gene415 | metE      | gi 57650036 ref NC_002951.2 :431988-438284 | MVR | M36C05 | OK     | 3.87992 | 5.43133 | 0.485279  | -0.469373 | 0.6388  | 0.999883  |
| gene416 | gene416 | SACOL0429 | gi 57650036 ref NC_002951.2 :431988-438284 | MVR | M36C05 | OK     | 3.43413 | 3.96014 | 0.205608  | -0.159574 | 0.87322 | 0.999883  |
| gene417 | gene417 | SACOL0430 | gi 57650036 ref NC_002951.2 :431988-438284 | MVR | M36C05 | OK     | 1.99723 | 3.78603 | 0.922683  | -0.471801 | 0.63707 | 0.999883  |
| gene418 | gene418 | SACOL0431 | gi 57650036 ref NC_002951.2 :431988-438284 | MVR | M36C05 | OK     | 1.79428 | 3.5371  | 0.979159  | -0.463998 | 0.64265 | 0.999883  |
| gene419 | gene419 | SACOL0432 | gi 57650036 ref NC_002951.2 :438947-439793 | MVR | M36C05 | OK     | 5.64046 | 4.43939 | -0.34545  | 0.485022  | 0.62766 | 0.999883  |
| gene42  | gene42  | ccrB      | gi 57650036 ref NC_002951.2 :46351-47976   | MVR | M36C05 | NOTEST | 0       | 0       | 0         | 0         | 1       | 1         |
| gene420 | gene420 | SACOL0433 | gi 57650036 ref NC_002951.2 :439949-440831 | MVR | M36C05 | OK     | 8.35345 | 6.63058 | -0.333237 | 0.482912  | 0.62916 | 0.999883  |
| gene421 | gene421 | SACOL0434 | gi 57650036 ref NC_002951.2 :440860-441064 | MVR | M36C05 | OK     | 33.1469 | 26.2662 | -0.335666 | 0.388823  | 0.69741 | 0.999883  |
| gene422 | gene422 | SACOL0435 | gi 57650036 ref NC_002951.2 :441075-442173 | MVR | M36C05 | OK     | 37.3363 | 21.6101 | -0.788874 | 1.10726   | 0.26818 | 0.952082  |
| gene423 | gene423 | SACOL0436 | gi 57650036 ref NC_002951.2 :442258-442450 | MVR | M36C05 | OK     | 1038.19 | 539.309 | -0.944882 | 1.36031   | 0.17373 | 0.821477  |
| gene424 | gene424 | rpsF      | gi 57650036 ref NC_002951.2 :442693-442990 | MVR | M36C05 | OK     | 326.056 | 87.6612 | -1.89511  | 2.70321   | 0.00687 | 0.132529  |
| gene425 | gene425 | ssb2      | gi 57650036 ref NC_002951.2 :443010-443514 | MVR | M36C05 | OK     | 216.302 | 46.4933 | -2.21795  | 3.02643   | 0.00247 | 0.0683793 |
| gene426 | gene426 | rpsR      | gi 57650036 ref NC_002951.2 :443565-443808 | MVR | M36C05 | OK     | 650.221 | 149.441 | -2.12135  | 3.0029    | 0.00267 | 0.0714146 |

|         |         |           |                                            |     |        |        |         |         |             |             |          |          |
|---------|---------|-----------|--------------------------------------------|-----|--------|--------|---------|---------|-------------|-------------|----------|----------|
| gene427 | gene427 | SACOL0440 | gi 57650036 ref NC_002951.2 :444073-445012 | MVR | M36C05 | OK     | 2.28997 | 3.43236 | 0.583871    | -0.778071   | 0.43653  | 0.999883 |
| gene428 | gene428 | SACOL0441 | gi 57650036 ref NC_002951.2 :445050-445598 | MVR | M36C05 | OK     | 2.70441 | 4.75926 | 0.815423    | -0.992153   | 0.32112  | 0.999883 |
| gene429 | gene429 | SACOL0442 | gi 57650036 ref NC_002951.2 :445957-446569 | MVR | M36C05 | OK     | 5.12206 | 4.82263 | -0.0869034  | 0.11579     | 0.90782  | 0.999883 |
| gene43  | gene43  | ccrA1     | gi 57650036 ref NC_002951.2 :47997-49347   | MVR | M36C05 | NOTEST | 0       | 0       | 0           | 0           | 1        | 1        |
| gene430 | gene430 | SACOL0443 | gi 57650036 ref NC_002951.2 :446937-447306 | MVR | M36C05 | OK     | 1.55177 | 1.93572 | 0.318961    | -0.258088   | 0.79634  | 0.999883 |
| gene431 | gene431 | SACOL0444 | gi 57650036 ref NC_002951.2 :447486-448059 | MVR | M36C05 | OK     | 22.9387 | 1250.85 | 5.76898     | -6.92765    | 4.28E-12 | 2.58E-09 |
| gene432 | gene432 | SACOL0445 | gi 57650036 ref NC_002951.2 :448196-448460 | MVR | M36C05 | OK     | 162.074 | 132.06  | -0.295467   | 0.433922    | 0.66435  | 0.999883 |
| gene433 | gene433 | SACOL0446 | gi 57650036 ref NC_002951.2 :448759-449011 | MVR | M36C05 | OK     | 634.718 | 15736.1 | 4.63182     | -5.34645    | 8.97E-08 | 1.56E-05 |
| gene434 | gene434 | SACOL0447 | gi 57650036 ref NC_002951.2 :449436-450018 | MVR | M36C05 | OK     | 15.0182 | 8.67014 | -0.79258    | 1.13493     | 0.25641  | 0.933885 |
| gene435 | gene435 | SACOL0448 | gi 57650036 ref NC_002951.2 :450083-450467 | MVR | M36C05 | OK     | 82.8777 | 65.4777 | -0.339979   | 0.497129    | 0.6191   | 0.999883 |
| gene436 | gene436 | SACOL0449 | gi 57650036 ref NC_002951.2 :450721-451348 | MVR | M36C05 | OK     | 51.783  | 47.8214 | -0.114823   | 0.164328    | 0.86947  | 0.999883 |
| gene437 | gene437 | SACOL0450 | gi 57650036 ref NC_002951.2 :451420-451714 | MVR | M36C05 | OK     | 52.1075 | 55.5988 | 0.0935641   | -0.135785   | 0.89199  | 0.999883 |
| gene438 | gene438 | ahpF      | gi 57650036 ref NC_002951.2 :451792-453316 | MVR | M36C05 | OK     | 958.409 | 1647.9  | 0.781919    | -0.812171   | 0.41669  | 0.999883 |
| gene439 | gene439 | ahpC      | gi 57650036 ref NC_002951.2 :453331-453901 | MVR | M36C05 | OK     | 889.839 | 2659.58 | 1.57958     | -1.65482    | 0.09796  | 0.63129  |
| gene44  | gene44  | SACOL0043 | gi 57650036 ref NC_002951.2 :49534-51600   | MVR | M36C05 | NOTEST | 0       | 0       | 0           | 0           | 1        | 1        |
| gene440 | gene440 | SACOL0453 | gi 57650036 ref NC_002951.2 :454392-455148 | MVR | M36C05 | OK     | 128.037 | 387.925 | 1.59922     | -1.89428    | 0.05819  | 0.483479 |
| gene441 | gene441 | SACOL0454 | gi 57650036 ref NC_002951.2 :455228-456617 | MVR | M36C05 | OK     | 39.7596 | 32.2638 | -0.301386   | 0.402699    | 0.68717  | 0.999883 |
| gene442 | gene442 | SACOL0455 | gi 57650036 ref NC_002951.2 :457593-458550 | MVR | M36C05 | OK     | 79.9367 | 93.2356 | 0.222023    | -0.283818   | 0.77655  | 0.999883 |
| gene443 | gene443 | SACOL0456 | gi 57650036 ref NC_002951.2 :458667-459330 | MVR | M36C05 | OK     | 62.4563 | 185.204 | 1.5682      | -2.05305    | 0.04007  | 0.389743 |
| gene444 | gene444 | SACOL0457 | gi 57650036 ref NC_002951.2 :459472-459880 | MVR | M36C05 | OK     | 1054.72 | 4023.41 | 1.93156     | -2.06395    | 0.03902  | 0.38357  |
| gene445 | gene445 | xpt       | gi 57650036 ref NC_002951.2 :460391-462238 | MVR | M36C05 | OK     | 43.294  | 49.8117 | 0.202318    | -0.139857   | 0.88877  | 0.999883 |
| gene446 | gene446 | pbuX      | gi 57650036 ref NC_002951.2 :460391-462238 | MVR | M36C05 | OK     | 42.4773 | 36.8166 | -0.206333   | 0.224139    | 0.82265  | 0.999883 |
| gene447 | gene447 | guaB      | gi 57650036 ref NC_002951.2 :462275-463742 | MVR | M36C05 | OK     | 109.349 | 118.06  | 0.110581    | -0.128676   | 0.89761  | 0.999883 |
| gene448 | gene448 | guaA      | gi 57650036 ref NC_002951.2 :463766-465308 | MVR | M36C05 | OK     | 166.673 | 149.486 | -0.157005   | 0.175376    | 0.86078  | 0.999883 |
| gene449 | gene449 | SACOL0462 | gi 57650036 ref NC_002951.2 :465420-465957 | MVR | M36C05 | OK     | 3.17205 | 5.57007 | 0.812279    | -1.01182    | 0.31163  | 0.993813 |
| gene45  | gene45  | SACOL0044 | gi 57650036 ref NC_002951.2 :49534-51600   | MVR | M36C05 | NOTEST | 0       | 0       | 0           | 0           | 1        | 1        |
| gene450 | gene450 | SACOL0463 | gi 57650036 ref NC_002951.2 :466349-467054 | MVR | M36C05 | OK     | 4.13267 | 2.40351 | -0.781934   | 0.999276    | 0.31766  | 0.999883 |
| gene451 | gene451 | SACOL0464 | gi 57650036 ref NC_002951.2 :467452-467725 | MVR | M36C05 | OK     | 2.39752 | 2.57159 | 0.101121    | -0.069172   | 0.94485  | 0.999883 |
| gene452 | gene452 | SACOL0465 | gi 57650036 ref NC_002951.2 :467985-468138 | MVR | M36C05 | OK     | 46.5922 | 0       | -1.79769e+3 | -1.79769e+3 | 0.04385  | 0.40838  |
| gene453 | gene453 | SACOL0466 | gi 57650036 ref NC_002951.2 :468661-469021 | MVR | M36C05 | OK     | 33.6032 | 63.1587 | 0.910383    | -1.32733    | 0.1844   | 0.834616 |
| gene454 | gene454 | SACOL0467 | gi 57650036 ref NC_002951.2 :469039-469885 | MVR | M36C05 | OK     | 46.8158 | 68.6398 | 0.55205     | -0.749686   | 0.45344  | 0.999883 |
| gene455 | gene455 | SACOL0468 | gi 57650036 ref NC_002951.2 :470356-471037 | MVR | M36C05 | OK     | 13.6883 | 41.0666 | 1.58502     | -2.29676    | 0.02163  | 0.276112 |
| gene456 | gene456 | SACOL0469 | gi 57650036 ref NC_002951.2 :471322-472018 | MVR | M36C05 | OK     | 3.5921  | 2.66967 | -0.428166   | 0.545936    | 0.58511  | 0.999883 |

|         |         |           |                                            |     |        |        |         |         |             |             |         |          |
|---------|---------|-----------|--------------------------------------------|-----|--------|--------|---------|---------|-------------|-------------|---------|----------|
| gene457 | gene457 | SACOL0470 | gi 57650036 ref NC_002951.2 :472308-473367 | MVR | M36C05 | OK     | 2.52126 | 1.66874 | -0.595386   | 0.77596     | 0.43777 | 0.999883 |
| gene458 | gene458 | SACOL0471 | gi 57650036 ref NC_002951.2 :473485-473623 | MVR | M36C05 | NOTEST | 0       | 0       | 0           | 0           | 1       | 1        |
| gene459 | gene459 | SACOL0472 | gi 57650036 ref NC_002951.2 :473731-474658 | MVR | M36C05 | OK     | 1.6636  | 1.66869 | 0.00440549  | -0.005398   | 0.99569 | 0.999883 |
| gene46  | gene46  | SACOL0045 | gi 57650036 ref NC_002951.2 :51770-53348   | MVR | M36C05 | NOTEST | 0       | 0       | 0           | 0           | 1       | 1        |
| gene460 | gene460 | SACOL0473 | gi 57650036 ref NC_002951.2 :475037-475736 | MVR | M36C05 | OK     | 1.477   | 1.32679 | -0.154728   | 0.167639    | 0.86687 | 0.999883 |
| gene461 | gene461 | SACOL0474 | gi 57650036 ref NC_002951.2 :476101-476785 | MVR | M36C05 | OK     | 4.19412 | 2.96397 | -0.500834   | 0.649129    | 0.51626 | 0.999883 |
| gene462 | gene462 | SACOL0475 | gi 57650036 ref NC_002951.2 :476869-476971 | MVR | M36C05 | NOTEST | 0       | 0       | 0           | 0           | 1       | 1        |
| gene463 | gene463 | hsdM1     | gi 57650036 ref NC_002951.2 :477048-479809 | MVR | M36C05 | OK     | 14.7862 | 13.24   | -0.159347   | 0.168523    | 0.86617 | 0.999883 |
| gene464 | gene464 | SACOL0477 | gi 57650036 ref NC_002951.2 :477048-479809 | MVR | M36C05 | OK     | 15.5677 | 10.6763 | -0.544146   | 0.476553    | 0.63368 | 0.999883 |
| gene465 | gene465 | SACOL0478 | gi 57650036 ref NC_002951.2 :480191-480869 | MVR | M36C05 | NOTEST | 0.90141 | 0.46173 | -0.965134   | 0.786404    | 0.43163 | 1        |
| gene466 | gene466 | SACOL0479 | gi 57650036 ref NC_002951.2 :480890-482399 | MVR | M36C05 | OK     | 3.68667 | 4.79982 | 0.380662    | -0.553671   | 0.5798  | 0.999883 |
| gene467 | gene467 | SACOL0480 | gi 57650036 ref NC_002951.2 :482502-482811 | MVR | M36C05 | OK     | 3189.82 | 11330.7 | 1.82869     | -1.91811    | 0.0551  | 0.465171 |
| gene468 | gene468 | SACOL0481 | gi 57650036 ref NC_002951.2 :483148-483949 | MVR | M36C05 | OK     | 2.33072 | 1.65194 | -0.496617   | 0.603593    | 0.54611 | 0.999883 |
| gene469 | gene469 | SACOL0482 | gi 57650036 ref NC_002951.2 :483980-484772 | MVR | M36C05 | NOTEST | 0       | 0       | 0           | 0           | 1       | 1        |
| gene47  | gene47  | SACOL0046 | gi 57650036 ref NC_002951.2 :53427-54756   | MVR | M36C05 | NOTEST | 0       | 0       | 0           | 0           | 1       | 1        |
| gene470 | gene470 | SACOL0483 | gi 57650036 ref NC_002951.2 :484841-485618 | MVR | M36C05 | NOTEST | 0       | 0       | 0           | 0           | 1       | 1        |
| gene471 | gene471 | SACOL0484 | gi 57650036 ref NC_002951.2 :485793-486609 | MVR | M36C05 | NOTEST | 0       | 0       | 0           | 0           | 1       | 1        |
| gene472 | gene472 | SACOL0485 | gi 57650036 ref NC_002951.2 :486627-487413 | MVR | M36C05 | OK     | 5.20196 | 1.88254 | -1.46637    | 1.8922      | 0.05847 | 0.484391 |
| gene473 | gene473 | SACOL0486 | gi 57650036 ref NC_002951.2 :487592-490046 | MVR | M36C05 | OK     | 33.0877 | 43.3357 | 0.389259    | -0.300544   | 0.76376 | 0.999883 |
| gene474 | gene474 | SACOL0487 | gi 57650036 ref NC_002951.2 :487592-490046 | MVR | M36C05 | OK     | 27.3314 | 36.7138 | 0.425759    | -0.408437   | 0.68295 | 0.999883 |
| gene475 | gene475 | SACOL0488 | gi 57650036 ref NC_002951.2 :487592-490046 | MVR | M36C05 | OK     | 30.248  | 49.5067 | 0.710786    | -0.247073   | 0.80485 | 0.999883 |
| gene476 | gene476 | SACOL0489 | gi 57650036 ref NC_002951.2 :490064-490379 | MVR | M36C05 | OK     | 69.6709 | 64.5917 | -0.109209   | 0.160429    | 0.87254 | 0.999883 |
| gene477 | gene477 | SACOL0490 | gi 57650036 ref NC_002951.2 :490668-490929 | MVR | M36C05 | OK     | 18.9983 | 13.0427 | -0.542629   | 0.654327    | 0.5129  | 0.999883 |
| gene478 | gene478 | SACOL0491 | gi 57650036 ref NC_002951.2 :491047-492250 | MVR | M36C05 | OK     | 3.5842  | 1.97856 | -0.857202   | 1.17663     | 0.23934 | 0.9107   |
| gene479 | gene479 | nuoF      | gi 57650036 ref NC_002951.2 :493837-495322 | MVR | M36C05 | OK     | 14.0533 | 15.5264 | 0.143814    | -0.206979   | 0.83603 | 0.999883 |
| gene48  | gene48  | SACOL0047 | gi 57650036 ref NC_002951.2 :54774-55842   | MVR | M36C05 | NOTEST | 0       | 0       | 0           | 0           | 1       | 1        |
| gene480 | gene480 | SACOL0495 | gi 57650036 ref NC_002951.2 :495334-498040 | MVR | M36C05 | OK     | 29.2225 | 25.9872 | -0.169276   | 0.214779    | 0.82994 | 0.999883 |
| gene481 | gene481 | SACOL0496 | gi 57650036 ref NC_002951.2 :498201-498564 | MVR | M36C05 | OK     | 117.064 | 130.825 | 0.160337    | -0.230328   | 0.81784 | 0.999883 |
| gene482 | gene482 | SACOL0497 | gi 57650036 ref NC_002951.2 :498792-499140 | MVR | M36C05 | OK     | 17.2507 | 13.8636 | -0.315349   | 0.425439    | 0.67052 | 0.999883 |
| gene483 | gene483 | SACOL0498 | gi 57650036 ref NC_002951.2 :499246-499921 | MVR | M36C05 | OK     | 9.85178 | 7.89908 | -0.318701   | 0.456534    | 0.64801 | 0.999883 |
| gene484 | gene484 | SACOL0499 | gi 57650036 ref NC_002951.2 :499957-500692 | MVR | M36C05 | OK     | 17.3914 | 14.2298 | -0.289462   | 0.425478    | 0.67049 | 0.999883 |
| gene485 | gene485 | SACOL0500 | gi 57650036 ref NC_002951.2 :500801-500918 | MVR | M36C05 | OK     | 132.094 | 0       | -1.79769e+3 | -1.79769e+3 | 0.22252 | 0.89416  |
| gene486 | gene486 | SACOL0501 | gi 57650036 ref NC_002951.2 :501147-502485 | MVR | M36C05 | OK     | 2.67746 | 2.13114 | -0.329237   | 0.454799    | 0.64925 | 0.999883 |

|         |         |            |                                            |     |        |        |         |         |             |             |         |           |
|---------|---------|------------|--------------------------------------------|-----|--------|--------|---------|---------|-------------|-------------|---------|-----------|
| gene487 | gene487 | SACOL0502  | gi 57650036 ref NC_002951.2 :502701-504742 | MVR | M36C05 | OK     | 30.3801 | 9.40915 | -1.69099    | 1.17427     | 0.24029 | 0.911371  |
| gene488 | gene488 | SACOL0503  | gi 57650036 ref NC_002951.2 :502701-504742 | MVR | M36C05 | OK     | 75.9809 | 11.8089 | -2.68576    | 2.97177     | 0.00296 | 0.0769228 |
| gene489 | gene489 | SACOL0504  | gi 57650036 ref NC_002951.2 :505035-506061 | MVR | M36C05 | OK     | 12.5415 | 12.5489 | 0.00084305  | -0.001239   | 0.99901 | 0.999883  |
| gene49  | gene49  | SACOL0048  | gi 57650036 ref NC_002951.2 :55980-56241   | MVR | M36C05 | NOTEST | 0       | 0       | 0           | 0           | 1       | 1         |
| gene490 | gene490 | SACOL0505  | gi 57650036 ref NC_002951.2 :506064-506724 | MVR | M36C05 | OK     | 8.31324 | 9.59663 | 0.207117    | -0.296245   | 0.76704 | 0.999883  |
| gene491 | gene491 | SACOL0506  | gi 57650036 ref NC_002951.2 :506760-507603 | MVR | M36C05 | OK     | 32.5897 | 28.9909 | -0.16882    | 0.242566    | 0.80834 | 0.999883  |
| gene492 | gene492 | SACOL0507  | gi 57650036 ref NC_002951.2 :507934-508939 | MVR | M36C05 | OK     | 521.51  | 562.46  | 0.109055    | -0.114029   | 0.90921 | 0.999883  |
| gene493 | gene493 | SACOL0508  | gi 57650036 ref NC_002951.2 :509123-509393 | MVR | M36C05 | OK     | 307.963 | 137.63  | -1.16196    | 1.67944     | 0.09307 | 0.611738  |
| gene494 | gene494 | SACOL0509  | gi 57650036 ref NC_002951.2 :509541-510412 | MVR | M36C05 | OK     | 13.6582 | 19.6074 | 0.521624    | -0.365831   | 0.71449 | 0.999883  |
| gene495 | gene495 | SACOL0510  | gi 57650036 ref NC_002951.2 :509541-510412 | MVR | M36C05 | OK     | 30.7068 | 44.3965 | 0.531888    | -0.680174   | 0.4964  | 0.999883  |
| gene496 | gene496 | SACOL0511  | gi 57650036 ref NC_002951.2 :510580-512472 | MVR | M36C05 | OK     | 14.1206 | 11.1642 | -0.338921   | 0.343268    | 0.7314  | 0.999883  |
| gene497 | gene497 | SACOL0512  | gi 57650036 ref NC_002951.2 :510580-512472 | MVR | M36C05 | OK     | 8.81483 | 8.09128 | -0.123564   | 0.128936    | 0.89741 | 0.999883  |
| gene498 | gene498 | gltC       | gi 57650036 ref NC_002951.2 :512592-513477 | MVR | M36C05 | OK     | 2.6539  | 4.02531 | 0.600985    | -0.808784   | 0.41864 | 0.999883  |
| gene499 | gene499 | gltB       | gi 57650036 ref NC_002951.2 :513657-518157 | MVR | M36C05 | OK     | 3.98082 | 14.2718 | 1.84203     | -2.5033     | 0.0123  | 0.189861  |
| gene5   | gene5   | gyrA       | gi 57650036 ref NC_002951.2 :7031-9695     | MVR | M36C05 | OK     | 124.295 | 51.1613 | -1.28065    | 1.44107     | 0.14957 | 0.751551  |
| gene50  | gene50  | SACOL0049  | gi 57650036 ref NC_002951.2 :56264-56996   | MVR | M36C05 | NOTEST | 0       | 0       | 0           | 0           | 1       | 1         |
| gene500 | gene500 | gltD       | gi 57650036 ref NC_002951.2 :518174-519638 | MVR | M36C05 | OK     | 3.7261  | 12.3834 | 1.73267     | -2.50914    | 0.0121  | 0.187953  |
| gene501 | gene501 | SACOL_tRNA | gi 57650036 ref NC_002951.2 :519906-519999 | MVR | M36C05 | NOTEST | 0       | 0       | 0           | 0           | 1       | 1         |
| gene502 | gene502 | SACOL0516  | gi 57650036 ref NC_002951.2 :520469-521897 | MVR | M36C05 | OK     | 73.3494 | 63.195  | -0.214975   | 0.266801    | 0.78962 | 0.999883  |
| gene503 | gene503 | SACOL0517  | gi 57650036 ref NC_002951.2 :521960-523601 | MVR | M36C05 | OK     | 14.1987 | 6.96051 | -1.0285     | 1.49263     | 0.13554 | 0.730357  |
| gene504 | gene504 | SACOL0518  | gi 57650036 ref NC_002951.2 :523625-524354 | MVR | M36C05 | OK     | 21.5343 | 8.34286 | -1.36802    | 1.98885     | 0.04672 | 0.42474   |
| gene505 | gene505 | SACOL0519  | gi 57650036 ref NC_002951.2 :524992-525517 | MVR | M36C05 | OK     | 13.1903 | 9.51321 | -0.471476   | 0.667451    | 0.50448 | 0.999883  |
| gene506 | gene506 | dnaX       | gi 57650036 ref NC_002951.2 :525585-527283 | MVR | M36C05 | OK     | 50.9882 | 55.9185 | 0.133161    | -0.166115   | 0.86807 | 0.999883  |
| gene507 | gene507 | SACOL0521  | gi 57650036 ref NC_002951.2 :527372-527690 | MVR | M36C05 | OK     | 315.533 | 325.858 | 0.0464511   | -0.062918   | 0.94983 | 0.999883  |
| gene508 | gene508 | recR       | gi 57650036 ref NC_002951.2 :527696-528293 | MVR | M36C05 | OK     | 214.828 | 203.823 | -0.075865   | 0.094483    | 0.92473 | 0.999883  |
| gene509 | gene509 | rrsA       | gi 57650036 ref NC_002951.2 :529145-530700 | MVR | M36C05 | OK     | 10770   | 12635.1 | 0.230416    | -0.322574   | 0.74702 | 0.999883  |
| gene51  | gene51  | pls        | gi 57650036 ref NC_002951.2 :57211-61858   | MVR | M36C05 | NOTEST | 0.01323 | 0       | -1.79769e+3 | -1.79769e+3 | 0.22252 | 1         |
| gene510 | gene510 | rrlA       | gi 57650036 ref NC_002951.2 :531064-533987 | MVR | M36C05 | HIDATA | 0       | 33541.8 | 0           | 0           | 1       | 1         |
| gene511 | gene511 | rrfA       | gi 57650036 ref NC_002951.2 :534059-534174 | MVR | M36C05 | OK     | 373015  | 80681.2 | -2.20893    | 2.7923      | 0.00523 | 0.110421  |
| gene512 | gene512 | SACOL0523  | gi 57650036 ref NC_002951.2 :535056-536394 | MVR | M36C05 | OK     | 10.6573 | 11.6244 | 0.125312    | -0.183368   | 0.85451 | 0.999883  |
| gene513 | gene513 | tmk        | gi 57650036 ref NC_002951.2 :536395-537013 | MVR | M36C05 | OK     | 28.7816 | 14.2598 | -1.01319    | 1.48302     | 0.13807 | 0.733494  |
| gene514 | gene514 | SACOL0525  | gi 57650036 ref NC_002951.2 :537040-537370 | MVR | M36C05 | OK     | 763.526 | 859.463 | 0.170759    | -0.2067     | 0.83624 | 0.999883  |
| gene515 | gene515 | SACOL0526  | gi 57650036 ref NC_002951.2 :537583-538510 | MVR | M36C05 | OK     | 50.4072 | 50.3642 | -0.0012326  | 0.001674    | 0.99866 | 0.999883  |

|         |         |           |                                            |     |        |        |         |         |            |           |          |           |
|---------|---------|-----------|--------------------------------------------|-----|--------|--------|---------|---------|------------|-----------|----------|-----------|
| gene516 | gene516 | SACOL0527 | gi 57650036 ref NC_002951.2 :538510-539314 | MVR | M36C05 | OK     | 46.6759 | 32.6918 | -0.513748  | 0.727825  | 0.46672  | 0.999883  |
| gene517 | gene517 | SACOL0528 | gi 57650036 ref NC_002951.2 :539330-539678 | MVR | M36C05 | OK     | 65.9064 | 35.0239 | -0.91208   | 1.33359   | 0.18234  | 0.830192  |
| gene518 | gene518 | SACOL0529 | gi 57650036 ref NC_002951.2 :539951-540918 | MVR | M36C05 | OK     | 12.2291 | 5.6636  | -1.11052   | 1.46238   | 0.14364  | 0.743774  |
| gene519 | gene519 | SACOL0530 | gi 57650036 ref NC_002951.2 :539951-540918 | MVR | M36C05 | OK     | 22.8221 | 8.27482 | -1.46363   | 0.845524  | 0.39782  | 0.999883  |
| gene52  | gene52  | SACOL0051 | gi 57650036 ref NC_002951.2 :61981-63598   | MVR | M36C05 | NOTEST | 0       | 0       | 0          | 0         | 1        | 1         |
| gene520 | gene520 | SACOL0531 | gi 57650036 ref NC_002951.2 :540919-541759 | MVR | M36C05 | OK     | 11.8654 | 6.0322  | -0.975999  | 1.41268   | 0.15775  | 0.776469  |
| gene521 | gene521 | SACOL0532 | gi 57650036 ref NC_002951.2 :541783-541939 | MVR | M36C05 | NOTEST | 0       | 0       | 0          | 0         | 1        | 1         |
| gene522 | gene522 | metS      | gi 57650036 ref NC_002951.2 :542043-544017 | MVR | M36C05 | OK     | 30.0134 | 20.1904 | -0.571938  | 0.762004  | 0.44606  | 0.999883  |
| gene523 | gene523 | SACOL0534 | gi 57650036 ref NC_002951.2 :544047-544821 | MVR | M36C05 | OK     | 49.5395 | 33.6342 | -0.55865   | 0.791721  | 0.42852  | 0.999883  |
| gene524 | gene524 | SACOL0535 | gi 57650036 ref NC_002951.2 :544987-545524 | MVR | M36C05 | OK     | 24.4434 | 23.5909 | -0.0512191 | 0.075272  | 0.94     | 0.999883  |
| gene525 | gene525 | ksgA      | gi 57650036 ref NC_002951.2 :545534-546428 | MVR | M36C05 | OK     | 21.5571 | 16.3689 | -0.3972    | 0.58063   | 0.56149  | 0.999883  |
| gene526 | gene526 | SACOL0537 | gi 57650036 ref NC_002951.2 :546527-546791 | MVR | M36C05 | OK     | 7532.52 | 4474.57 | -0.751382  | 0.788138  | 0.43062  | 0.999883  |
| gene527 | gene527 | ipk       | gi 57650036 ref NC_002951.2 :547100-547949 | MVR | M36C05 | OK     | 38.3582 | 48.2674 | 0.331513   | -0.462819 | 0.64349  | 0.999883  |
| gene528 | gene528 | purR      | gi 57650036 ref NC_002951.2 :547962-548787 | MVR | M36C05 | OK     | 55.7477 | 59.6539 | 0.0977038  | -0.132974 | 0.89421  | 0.999883  |
| gene529 | gene529 | SACOL0540 | gi 57650036 ref NC_002951.2 :548803-549184 | MVR | M36C05 | OK     | 84.6528 | 998.901 | 3.56071    | -4.50795  | 6.55E-06 | 0.0005921 |
| gene53  | gene53  | SACOL0052 | gi 57650036 ref NC_002951.2 :63757-65269   | MVR | M36C05 | NOTEST | 0       | 0       | 0          | 0         | 1        | 1         |
| gene530 | gene530 | spoVG     | gi 57650036 ref NC_002951.2 :549255-549558 | MVR | M36C05 | OK     | 340.373 | 3141.43 | 3.20624    | -3.81225  | 0.00014  | 0.0076077 |
| gene531 | gene531 | SACOL0542 | gi 57650036 ref NC_002951.2 :549747-549879 | MVR | M36C05 | NOTEST | 0       | 0       | 0          | 0         | 1        | 1         |
| gene532 | gene532 | glmU      | gi 57650036 ref NC_002951.2 :549901-551254 | MVR | M36C05 | OK     | 50.0924 | 50.2904 | 0.00568932 | -0.007369 | 0.99412  | 0.999883  |
| gene533 | gene533 | prsA      | gi 57650036 ref NC_002951.2 :551400-552366 | MVR | M36C05 | OK     | 106.551 | 48.3729 | -1.13927   | 1.47868   | 0.13923  | 0.736061  |
| gene534 | gene534 | rplY      | gi 57650036 ref NC_002951.2 :552515-553169 | MVR | M36C05 | OK     | 937.4   | 190.828 | -2.29639   | 2.59817   | 0.00937  | 0.161634  |
| gene535 | gene535 | pth       | gi 57650036 ref NC_002951.2 :553479-560527 | MVR | M36C05 | OK     | 34.9941 | 36.9987 | 0.0803635  | -0.023109 | 0.98156  | 0.999883  |
| gene536 | gene536 | mfd       | gi 57650036 ref NC_002951.2 :553479-560527 | MVR | M36C05 | OK     | 41.6565 | 18.4583 | -1.17427   | 0.936729  | 0.3489   | 0.999883  |
| gene537 | gene537 | SACOL0548 | gi 57650036 ref NC_002951.2 :553479-560527 | MVR | M36C05 | OK     | 34.5172 | 14.204  | -1.28102   | 0.576372  | 0.56436  | 0.999883  |
| gene538 | gene538 | SACOL0549 | gi 57650036 ref NC_002951.2 :553479-560527 | MVR | M36C05 | OK     | 55.588  | 40.2625 | -0.465339  | 0.261569  | 0.79365  | 0.999883  |
| gene539 | gene539 | SACOL0550 | gi 57650036 ref NC_002951.2 :553479-560527 | MVR | M36C05 | OK     | 35.0431 | 26.6929 | -0.392675  | 0.047596  | 0.96204  | 0.999883  |
| gene54  | gene54  | SACOL0054 | gi 57650036 ref NC_002951.2 :65291-67344   | MVR | M36C05 | NOTEST | 0       | 0       | 0          | 0         | 1        | 1         |
| gene540 | gene540 | SACOL0551 | gi 57650036 ref NC_002951.2 :560544-560937 | MVR | M36C05 | OK     | 79.2156 | 63.1148 | -0.327805  | 0.479239  | 0.63177  | 0.999883  |
| gene541 | gene541 | SACOL0552 | gi 57650036 ref NC_002951.2 :561041-561443 | MVR | M36C05 | OK     | 287.266 | 118.07  | -1.28274   | 1.74243   | 0.08143  | 0.568124  |
| gene542 | gene542 | SACOL0553 | gi 57650036 ref NC_002951.2 :561622-562918 | MVR | M36C05 | OK     | 9.27445 | 4.42575 | -1.06734   | 1.55685   | 0.11951  | 0.68714   |
| gene543 | gene543 | hpt       | gi 57650036 ref NC_002951.2 :562922-563462 | MVR | M36C05 | OK     | 24.9522 | 11.0417 | -1.1762    | 1.7014    | 0.08887  | 0.597944  |
| gene544 | gene544 | SACOL0555 | gi 57650036 ref NC_002951.2 :563718-565812 | MVR | M36C05 | OK     | 170.903 | 219.945 | 0.36396    | -0.385712 | 0.69971  | 0.999883  |
| gene545 | gene545 | hslO      | gi 57650036 ref NC_002951.2 :566040-566922 | MVR | M36C05 | OK     | 47.6324 | 33.9615 | -0.488044  | 0.682283  | 0.49506  | 0.999883  |



|         |         |             |                                            |     |        |        |         |         |            |           |         |          |
|---------|---------|-------------|--------------------------------------------|-----|--------|--------|---------|---------|------------|-----------|---------|----------|
| gene546 | gene546 | cysK        | gi 57650036 ref NC_002951.2 :567100-568033 | MVR | M36C05 | OK     | 157.448 | 465.361 | 1.56348    | -1.75975  | 0.07845 | 0.55661  |
| gene547 | gene547 | folP        | gi 57650036 ref NC_002951.2 :568248-569868 | MVR | M36C05 | OK     | 16.9364 | 15.524  | -0.125622  | 0.1161    | 0.90757 | 0.999883 |
| gene548 | gene548 | folB        | gi 57650036 ref NC_002951.2 :568248-569868 | MVR | M36C05 | OK     | 11.455  | 26.2473 | 1.19619    | -0.558577 | 0.57645 | 0.999883 |
| gene549 | gene549 | folK        | gi 57650036 ref NC_002951.2 :568248-569868 | MVR | M36C05 | OK     | 43.7566 | 32.2832 | -0.438717  | 0.411933  | 0.68039 | 0.999883 |
| gene55  | gene55  | SACOL0057   | gi 57650036 ref NC_002951.2 :68406-68499   | MVR | M36C05 | NOTEST | 0       | 0       | 0          | 0         | 1       | 1        |
| gene550 | gene550 | SACOL0561   | gi 57650036 ref NC_002951.2 :570261-570354 | MVR | M36C05 | NOTEST | 0       | 0       | 0          | 0         | 1       | 1        |
| gene551 | gene551 | lysS        | gi 57650036 ref NC_002951.2 :570406-571894 | MVR | M36C05 | OK     | 121.923 | 137.358 | 0.171973   | -0.196938 | 0.84388 | 0.999883 |
| gene552 | gene552 | rrfG        | gi 57650036 ref NC_002951.2 :572451-572566 | MVR | M36C05 | OK     | 409779  | 113856  | -1.84764   | 2.28585   | 0.02226 | 0.282659 |
| gene554 | gene554 | rrsB        | gi 57650036 ref NC_002951.2 :572775-574330 | MVR | M36C05 | OK     | 10550.1 | 12971.5 | 0.298086   | -0.417728 | 0.67615 | 0.999883 |
| gene555 | gene555 | SACOL_tRNA- | gi 57650036 ref NC_002951.2 :574422-574499 | MVR | M36C05 | NOTEST | 0       | 0       | 0          | 0         | 1       | 1        |
| gene556 | gene556 | rrlB        | gi 57650036 ref NC_002951.2 :574666-577589 | MVR | M36C05 | HIDATA | 0       | 39771.2 | 0          | 0         | 1       | 1        |
| gene557 | gene557 | rrfB        | gi 57650036 ref NC_002951.2 :577661-577776 | MVR | M36C05 | OK     | 546950  | 303616  | -0.849161  | 0.980949  | 0.32662 | 0.999883 |
| gene558 | gene558 | rrsC        | gi 57650036 ref NC_002951.2 :577987-579542 | MVR | M36C05 | OK     | 11084.7 | 12997.3 | 0.229638   | -0.323681 | 0.74618 | 0.999883 |
| gene559 | gene559 | rrlC        | gi 57650036 ref NC_002951.2 :579844-582767 | MVR | M36C05 | HIDATA | 0       | 31420.1 | 0          | 0         | 1       | 1        |
| gene56  | gene56  | SACOL0058   | gi 57650036 ref NC_002951.2 :68645-70391   | MVR | M36C05 | NOTEST | 0       | 0       | 0          | 0         | 1       | 1        |
| gene560 | gene560 | rrfC        | gi 57650036 ref NC_002951.2 :582839-582954 | MVR | M36C05 | OK     | 386541  | 506911  | 0.39111    | -0.447805 | 0.65429 | 0.999883 |
| gene561 | gene561 | SACOL0563   | gi 57650036 ref NC_002951.2 :583478-584861 | MVR | M36C05 | OK     | 1.41292 | 1.30456 | -0.115116  | 0.148391  | 0.88203 | 0.999883 |
| gene562 | gene562 | SACOL0564   | gi 57650036 ref NC_002951.2 :584964-585852 | MVR | M36C05 | OK     | 167.145 | 56.5892 | -1.5625    | 1.97813   | 0.04791 | 0.430141 |
| gene563 | gene563 | SACOL0565   | gi 57650036 ref NC_002951.2 :585855-586416 | MVR | M36C05 | OK     | 222.611 | 73.0966 | -1.60665   | 2.12561   | 0.03354 | 0.350737 |
| gene564 | gene564 | nupC        | gi 57650036 ref NC_002951.2 :586623-587838 | MVR | M36C05 | OK     | 80.4354 | 36.3874 | -1.14439   | 1.48476   | 0.13761 | 0.73333  |
| gene565 | gene565 | ctsR        | gi 57650036 ref NC_002951.2 :587995-588457 | MVR | M36C05 | OK     | 194.883 | 187.883 | -0.0527758 | 0.069621  | 0.9445  | 0.999883 |
| gene566 | gene566 | SACOL0568   | gi 57650036 ref NC_002951.2 :588475-590039 | MVR | M36C05 | OK     | 194.884 | 232.546 | 0.254902   | -0.164874 | 0.86904 | 0.999883 |
| gene567 | gene567 | SACOL0569   | gi 57650036 ref NC_002951.2 :588475-590039 | MVR | M36C05 | OK     | 191.769 | 174.552 | -0.135712  | 0.122085  | 0.90283 | 0.999883 |
| gene568 | gene568 | clpC        | gi 57650036 ref NC_002951.2 :590052-592508 | MVR | M36C05 | OK     | 256.974 | 214.923 | -0.257801  | 0.266447  | 0.7899  | 0.999883 |
| gene569 | gene569 | radA        | gi 57650036 ref NC_002951.2 :592994-594359 | MVR | M36C05 | OK     | 24.0396 | 16.1806 | -0.571148  | 0.809699  | 0.41811 | 0.999883 |
| gene57  | gene57  | SACOL0059   | gi 57650036 ref NC_002951.2 :70484-70937   | MVR | M36C05 | OK     | 20.3118 | 17.8818 | -0.183831  | 0.265378  | 0.79072 | 0.999883 |
| gene570 | gene570 | SACOL0573   | gi 57650036 ref NC_002951.2 :594383-595457 | MVR | M36C05 | OK     | 18.8511 | 11.4805 | -0.71546   | 1.04464   | 0.29619 | 0.9791   |
| gene571 | gene571 | gltX        | gi 57650036 ref NC_002951.2 :596013-597468 | MVR | M36C05 | OK     | 54.3521 | 25.3838 | -1.09843   | 1.45149   | 0.14665 | 0.743774 |
| gene572 | gene572 | cysE        | gi 57650036 ref NC_002951.2 :597896-600319 | MVR | M36C05 | OK     | 23.4952 | 57.4322 | 1.2895     | -0.688038 | 0.49143 | 0.999883 |
| gene573 | gene573 | cysS        | gi 57650036 ref NC_002951.2 :597896-600319 | MVR | M36C05 | OK     | 30.2114 | 80.2202 | 1.40887    | -1.45003  | 0.14705 | 0.743774 |
| gene574 | gene574 | SACOL0577   | gi 57650036 ref NC_002951.2 :597896-600319 | MVR | M36C05 | OK     | 28.6024 | 84.7463 | 1.56702    | -0.654672 | 0.51268 | 0.999883 |
| gene575 | gene575 | SACOL0578   | gi 57650036 ref NC_002951.2 :600326-601597 | MVR | M36C05 | OK     | 28.5073 | 73.0144 | 1.35685    | -1.30402  | 0.19223 | 0.852075 |
| gene576 | gene576 | SACOL0579   | gi 57650036 ref NC_002951.2 :600326-601597 | MVR | M36C05 | OK     | 46.1661 | 103.966 | 1.1712     | -1.05822  | 0.28996 | 0.975616 |

|         |         |           |                                            |     |        |        |         |         |           |           |          |           |
|---------|---------|-----------|--------------------------------------------|-----|--------|--------|---------|---------|-----------|-----------|----------|-----------|
| gene577 | gene577 | SACOL0580 | gi 57650036 ref NC_002951.2 :601677-602247 | MVR | M36C05 | OK     | 19.2526 | 34.912  | 0.858674  | -1.25702  | 0.20875  | 0.885625  |
| gene578 | gene578 | secE      | gi 57650036 ref NC_002951.2 :602560-602743 | MVR | M36C05 | OK     | 173.968 | 91.2481 | -0.930958 | 1.26499   | 0.20588  | 0.878491  |
| gene579 | gene579 | nusG      | gi 57650036 ref NC_002951.2 :602755-603304 | MVR | M36C05 | OK     | 179.742 | 119.906 | -0.584031 | 0.767536  | 0.44276  | 0.999883  |
| gene58  | gene58  | SACOL0061 | gi 57650036 ref NC_002951.2 :71151-72167   | MVR | M36C05 | NOTEST | 0       | 0       | 0         | 0         | 1        | 1         |
| gene580 | gene580 | rplK      | gi 57650036 ref NC_002951.2 :603475-603907 | MVR | M36C05 | OK     | 385.664 | 157.756 | -1.28965  | 1.67228   | 0.09447  | 0.61699   |
| gene581 | gene581 | rplA      | gi 57650036 ref NC_002951.2 :604114-604807 | MVR | M36C05 | OK     | 710.546 | 154.665 | -2.19978  | 2.52888   | 0.01144  | 0.182325  |
| gene582 | gene582 | rplJ      | gi 57650036 ref NC_002951.2 :605078-605579 | MVR | M36C05 | OK     | 209.984 | 34.8505 | -2.59102  | 3.55577   | 0.00038  | 0.0161387 |
| gene583 | gene583 | rplL      | gi 57650036 ref NC_002951.2 :605621-605990 | MVR | M36C05 | OK     | 742.908 | 90.9789 | -3.02958  | 3.95708   | 7.59E-05 | 0.0045006 |
| gene584 | gene584 | SACOL0587 | gi 57650036 ref NC_002951.2 :606164-606773 | MVR | M36C05 | OK     | 47.2161 | 19.9721 | -1.2413   | 1.80728   | 0.07072  | 0.522414  |
| gene585 | gene585 | rpoB      | gi 57650036 ref NC_002951.2 :606987-610539 | MVR | M36C05 | OK     | 180.174 | 111.104 | -0.697484 | 0.726879  | 0.4673   | 0.999883  |
| gene586 | gene586 | rpoC      | gi 57650036 ref NC_002951.2 :610675-614299 | MVR | M36C05 | OK     | 181.193 | 94.7043 | -0.936026 | 0.981     | 0.32659  | 0.999883  |
| gene587 | gene587 | SACOL0590 | gi 57650036 ref NC_002951.2 :614435-614690 | MVR | M36C05 | OK     | 212.754 | 26.2795 | -3.01718  | 4.18359   | 2.87E-05 | 0.001959  |
| gene588 | gene588 | rpsL      | gi 57650036 ref NC_002951.2 :614787-615201 | MVR | M36C05 | OK     | 862.506 | 280.331 | -1.6214   | 1.96201   | 0.04976  | 0.438109  |
| gene589 | gene589 | rpsG      | gi 57650036 ref NC_002951.2 :615266-615737 | MVR | M36C05 | OK     | 1143.11 | 261.515 | -2.12799  | 2.47745   | 0.01323  | 0.19827   |
| gene59  | gene59  | SACOL0062 | gi 57650036 ref NC_002951.2 :71151-72167   | MVR | M36C05 | NOTEST | 0       | 0       | 0         | 0         | 1        | 1         |
| gene590 | gene590 | fusA      | gi 57650036 ref NC_002951.2 :615859-617941 | MVR | M36C05 | OK     | 674.365 | 164.957 | -2.03144  | 2.13117   | 0.03307  | 0.34869   |
| gene591 | gene591 | tuf       | gi 57650036 ref NC_002951.2 :618157-619342 | MVR | M36C05 | OK     | 1348.92 | 543.421 | -1.31166  | 1.35032   | 0.17692  | 0.821477  |
| gene592 | gene592 | SACOL0595 | gi 57650036 ref NC_002951.2 :619623-620799 | MVR | M36C05 | OK     | 23.0978 | 43.4909 | 0.912956  | -1.25773  | 0.20849  | 0.885625  |
| gene593 | gene593 | SACOL0596 | gi 57650036 ref NC_002951.2 :620969-622157 | MVR | M36C05 | OK     | 337.06  | 350.17  | 0.05505   | -0.058749 | 0.95315  | 0.999883  |
| gene594 | gene594 | SACOL0597 | gi 57650036 ref NC_002951.2 :622422-623301 | MVR | M36C05 | OK     | 179.082 | 1032.61 | 2.5276    | -2.7731   | 0.00555  | 0.115648  |
| gene595 | gene595 | SACOL0598 | gi 57650036 ref NC_002951.2 :623460-625098 | MVR | M36C05 | OK     | 10.5889 | 8.35471 | -0.341892 | 0.49913   | 0.61769  | 0.999883  |
| gene596 | gene596 | SACOL0599 | gi 57650036 ref NC_002951.2 :625311-626277 | MVR | M36C05 | OK     | 84.563  | 50.6764 | -0.738712 | 0.970455  | 0.33182  | 0.999883  |
| gene597 | gene597 | ilvE      | gi 57650036 ref NC_002951.2 :626611-627834 | MVR | M36C05 | OK     | 104.139 | 266.417 | 1.35517   | -1.51011  | 0.13102  | 0.718382  |
| gene598 | gene598 | SACOL0601 | gi 57650036 ref NC_002951.2 :626611-627834 | MVR | M36C05 | OK     | 17.1861 | 13.8763 | -0.308622 | 0.013039  | 0.9896   | 0.999883  |
| gene599 | gene599 | SACOL0602 | gi 57650036 ref NC_002951.2 :627937-628621 | MVR | M36C05 | OK     | 61.0053 | 140.675 | 1.20536   | -1.60056  | 0.10947  | 0.659073  |
| gene6   | gene6   | SACOL0007 | gi 57650036 ref NC_002951.2 :9781-10483    | MVR | M36C05 | OK     | 36.3265 | 19.3432 | -0.9092   | 1.32524   | 0.18509  | 0.836151  |
| gene60  | gene60  | SACOL0063 | gi 57650036 ref NC_002951.2 :72303-73371   | MVR | M36C05 | NOTEST | 0       | 0       | 0         | 0         | 1        | 1         |
| gene600 | gene600 | SACOL0603 | gi 57650036 ref NC_002951.2 :628736-630009 | MVR | M36C05 | OK     | 51.5364 | 27.1729 | -0.923426 | 1.2017    | 0.22948  | 0.898537  |
| gene601 | gene601 | SACOL0604 | gi 57650036 ref NC_002951.2 :628736-630009 | MVR | M36C05 | OK     | 9.79167 | 6.60177 | -0.568702 | 0.324881  | 0.74527  | 0.999883  |
| gene602 | gene602 | SACOL0605 | gi 57650036 ref NC_002951.2 :630075-630545 | MVR | M36C05 | OK     | 20.8322 | 22.8954 | 0.136242  | -0.198527 | 0.84263  | 0.999883  |
| gene603 | gene603 | SACOL0606 | gi 57650036 ref NC_002951.2 :630692-631562 | MVR | M36C05 | OK     | 14.3921 | 17.4499 | 0.277938  | -0.408071 | 0.68322  | 0.999883  |
| gene604 | gene604 | SACOL0607 | gi 57650036 ref NC_002951.2 :631582-632149 | MVR | M36C05 | OK     | 53.1502 | 28.5794 | -0.895098 | 1.30254   | 0.19273  | 0.853083  |
| gene605 | gene605 | sdrC      | gi 57650036 ref NC_002951.2 :632578-635422 | MVR | M36C05 | OK     | 8.17108 | 4.45931 | -0.873705 | 1.26349   | 0.20641  | 0.87934   |

|         |         |           |                                            |     |        |        |         |         |            |           |          |           |
|---------|---------|-----------|--------------------------------------------|-----|--------|--------|---------|---------|------------|-----------|----------|-----------|
| gene606 | gene606 | sdrD      | gi 57650036 ref NC_002951.2 :635788-639934 | MVR | M36C05 | OK     | 70.948  | 17.7861 | -1.99601   | 2.32715   | 0.01996  | 0.260836  |
| gene607 | gene607 | sdrE      | gi 57650036 ref NC_002951.2 :640327-643828 | MVR | M36C05 | OK     | 9.94231 | 9.74664 | -0.028677  | 0.039391  | 0.96858  | 0.999883  |
| gene608 | gene608 | SACOL0611 | gi 57650036 ref NC_002951.2 :643946-645419 | MVR | M36C05 | OK     | 11.0978 | 12.8154 | 0.207605   | -0.301917 | 0.76272  | 0.999883  |
| gene609 | gene609 | SACOL0612 | gi 57650036 ref NC_002951.2 :645542-647033 | MVR | M36C05 | OK     | 49.7153 | 68.2204 | 0.456513   | -0.573414 | 0.56636  | 0.999883  |
| gene61  | gene61  | SACOL0064 | gi 57650036 ref NC_002951.2 :73401-74736   | MVR | M36C05 | NOTEST | 0       | 0       | 0          | 0         | 1        | 1         |
| gene610 | gene610 | SACOL0613 | gi 57650036 ref NC_002951.2 :647314-648193 | MVR | M36C05 | OK     | 147.658 | 62.3758 | -1.2432    | 1.58218   | 0.11361  | 0.667905  |
| gene611 | gene611 | SACOL0614 | gi 57650036 ref NC_002951.2 :648205-648871 | MVR | M36C05 | OK     | 44.0446 | 25.5767 | -0.784136  | 1.13759   | 0.25529  | 0.93309   |
| gene612 | gene612 | SACOL0615 | gi 57650036 ref NC_002951.2 :648884-649247 | MVR | M36C05 | OK     | 153.269 | 70.7522 | -1.11522   | 1.61036   | 0.10732  | 0.653986  |
| gene613 | gene613 | nagB      | gi 57650036 ref NC_002951.2 :649522-650281 | MVR | M36C05 | OK     | 10.1637 | 15.9862 | 0.653404   | -0.955964 | 0.33909  | 0.999883  |
| gene614 | gene614 | SACOL0617 | gi 57650036 ref NC_002951.2 :650357-650990 | MVR | M36C05 | OK     | 48.4518 | 197.552 | 2.02761    | -2.68605  | 0.00723  | 0.137697  |
| gene615 | gene615 | SACOL0618 | gi 57650036 ref NC_002951.2 :650991-651540 | MVR | M36C05 | OK     | 92.0281 | 261.008 | 1.50395    | -1.95341  | 0.05077  | 0.443669  |
| gene616 | gene616 | SACOL0619 | gi 57650036 ref NC_002951.2 :651643-652300 | MVR | M36C05 | OK     | 3.78035 | 4.10539 | 0.119      | -0.155677 | 0.87629  | 0.999883  |
| gene617 | gene617 | proP      | gi 57650036 ref NC_002951.2 :652801-654202 | MVR | M36C05 | OK     | 256.598 | 246.076 | -0.0604075 | 0.065181  | 0.94803  | 0.999883  |
| gene618 | gene618 | SACOL0621 | gi 57650036 ref NC_002951.2 :654745-656122 | MVR | M36C05 | OK     | 1.67389 | 3.55901 | 1.08827    | -1.49979  | 0.13367  | 0.7248    |
| gene619 | gene619 | atoB      | gi 57650036 ref NC_002951.2 :656123-657603 | MVR | M36C05 | OK     | 5.36289 | 9.26618 | 0.788965   | -1.09138  | 0.27511  | 0.960416  |
| gene62  | gene62  | SACOL0065 | gi 57650036 ref NC_002951.2 :74754-75948   | MVR | M36C05 | NOTEST | 0       | 0       | 0          | 0         | 1        | 1         |
| gene620 | gene620 | SACOL0623 | gi 57650036 ref NC_002951.2 :656123-657603 | MVR | M36C05 | OK     | 3.55501 | 6.56184 | 0.884248   | -0.413937 | 0.67892  | 0.999883  |
| gene621 | gene621 | SACOL0624 | gi 57650036 ref NC_002951.2 :657605-657875 | MVR | M36C05 | OK     | 4.94058 | 2.64674 | -0.900467  | 0.721064  | 0.47087  | 0.999883  |
| gene622 | gene622 | SACOL0625 | gi 57650036 ref NC_002951.2 :658075-658243 | MVR | M36C05 | OK     | 483.067 | 667.652 | 0.466872   | -0.683055 | 0.49457  | 0.999883  |
| gene623 | gene623 | thiD1     | gi 57650036 ref NC_002951.2 :658749-659580 | MVR | M36C05 | OK     | 74.1738 | 86.8807 | 0.228125   | -0.299768 | 0.76435  | 0.999883  |
| gene624 | gene624 | ung       | gi 57650036 ref NC_002951.2 :659763-660420 | MVR | M36C05 | OK     | 64.941  | 19.561  | -1.73115   | 2.47633   | 0.01327  | 0.198481  |
| gene625 | gene625 | SACOL0628 | gi 57650036 ref NC_002951.2 :660420-660801 | MVR | M36C05 | OK     | 44.1352 | 18.1398 | -1.28277   | 1.84461   | 0.0651   | 0.510075  |
| gene626 | gene626 | SACOL0629 | gi 57650036 ref NC_002951.2 :660933-661302 | MVR | M36C05 | OK     | 59.3551 | 15.4858 | -1.93843   | 2.7584    | 0.00581  | 0.118414  |
| gene627 | gene627 | SACOL0630 | gi 57650036 ref NC_002951.2 :661422-662907 | MVR | M36C05 | OK     | 24.8599 | 409.605 | 4.04234    | -4.72648  | 2.28E-06 | 0.0002265 |
| gene628 | gene628 | SACOL0631 | gi 57650036 ref NC_002951.2 :663048-663501 | MVR | M36C05 | OK     | 12.6949 | 22.2432 | 0.809114   | -1.15283  | 0.24898  | 0.922459  |
| gene629 | gene629 | SACOL0632 | gi 57650036 ref NC_002951.2 :663513-664278 | MVR | M36C05 | OK     | 15.1306 | 37.8808 | 1.324      | -1.9177   | 0.05515  | 0.465171  |
| gene63  | gene63  | SACOL0066 | gi 57650036 ref NC_002951.2 :76214-76316   | MVR | M36C05 | NOTEST | 0       | 0       | 0          | 0         | 1        | 1         |
| gene630 | gene630 | SACOL0633 | gi 57650036 ref NC_002951.2 :664826-665579 | MVR | M36C05 | OK     | 169.326 | 171.575 | 0.0190357  | -0.023321 | 0.98139  | 0.999883  |
| gene631 | gene631 | eutD      | gi 57650036 ref NC_002951.2 :665746-666733 | MVR | M36C05 | OK     | 103.696 | 59.1312 | -0.810369  | 1.04033   | 0.29819  | 0.980231  |
| gene632 | gene632 | SACOL0635 | gi 57650036 ref NC_002951.2 :666735-667572 | MVR | M36C05 | OK     | 123.24  | 47.0999 | -1.38768   | 1.82472   | 0.06804  | 0.522414  |
| gene633 | gene633 | mvk       | gi 57650036 ref NC_002951.2 :668158-669079 | MVR | M36C05 | OK     | 12.5844 | 15.2963 | 0.281549   | -0.413633 | 0.67914  | 0.999883  |
| gene634 | gene634 | mvaD      | gi 57650036 ref NC_002951.2 :669083-670067 | MVR | M36C05 | OK     | 12.8496 | 32.914  | 1.35697    | -1.94929  | 0.05126  | 0.445887  |
| gene635 | gene635 | SACOL0638 | gi 57650036 ref NC_002951.2 :670079-671156 | MVR | M36C05 | OK     | 14.6714 | 23.5111 | 0.680338   | -0.984539 | 0.32485  | 0.999883  |

|         |         |           |                                            |     |        |        |         |         |            |           |         |          |
|---------|---------|-----------|--------------------------------------------|-----|--------|--------|---------|---------|------------|-----------|---------|----------|
| gene636 | gene636 | SACOL0639 | gi 57650036 ref NC_002951.2 :671332-671674 | MVR | M36C05 | OK     | 12.8859 | 9.84805 | -0.387881  | 0.496859  | 0.61929 | 0.999883 |
| gene637 | gene637 | SACOL0640 | gi 57650036 ref NC_002951.2 :671726-673476 | MVR | M36C05 | OK     | 34.058  | 84.2257 | 1.30627    | -1.58295  | 0.11343 | 0.667905 |
| gene638 | gene638 | SACOL0641 | gi 57650036 ref NC_002951.2 :671726-673476 | MVR | M36C05 | OK     | 20.3311 | 30.6622 | 0.592774   | -0.21866  | 0.82692 | 0.999883 |
| gene639 | gene639 | SACOL0642 | gi 57650036 ref NC_002951.2 :673533-673635 | MVR | M36C05 | NOTEST | 0       | 0       | 0          | 0         | 1       | 1        |
| gene64  | gene64  | SACOL0067 | gi 57650036 ref NC_002951.2 :76614-77547   | MVR | M36C05 | OK     | 17.485  | 17.7538 | 0.0220089  | -0.032197 | 0.97432 | 0.999883 |
| gene640 | gene640 | SACOL0643 | gi 57650036 ref NC_002951.2 :674100-675510 | MVR | M36C05 | OK     | 12.5255 | 12.3899 | -0.015703  | 0.022848  | 0.98177 | 0.999883 |
| gene641 | gene641 | SACOL0644 | gi 57650036 ref NC_002951.2 :675513-676140 | MVR | M36C05 | OK     | 1.1604  | 4.65289 | 2.0035     | -2.24053  | 0.02506 | 0.300717 |
| gene642 | gene642 | SACOL0645 | gi 57650036 ref NC_002951.2 :676265-676907 | MVR | M36C05 | OK     | 2.93689 | 1.74794 | -0.74864   | 0.875983  | 0.38104 | 0.999883 |
| gene643 | gene643 | SACOL0646 | gi 57650036 ref NC_002951.2 :676994-677612 | MVR | M36C05 | OK     | 4.59912 | 4.22513 | -0.122361  | 0.160616  | 0.8724  | 0.999883 |
| gene644 | gene644 | SACOL0647 | gi 57650036 ref NC_002951.2 :677686-678316 | MVR | M36C05 | OK     | 2.73562 | 2.82356 | 0.0456444  | -0.055644 | 0.95563 | 0.999883 |
| gene645 | gene645 | SACOL0648 | gi 57650036 ref NC_002951.2 :678511-679132 | MVR | M36C05 | OK     | 3.3865  | 2.35967 | -0.521213  | 0.633487  | 0.52642 | 0.999883 |
| gene646 | gene646 | SACOL0649 | gi 57650036 ref NC_002951.2 :679262-679904 | MVR | M36C05 | OK     | 2.65719 | 1.24853 | -1.08968   | 1.20602   | 0.22781 | 0.898537 |
| gene647 | gene647 | SACOL0650 | gi 57650036 ref NC_002951.2 :679950-680580 | MVR | M36C05 | OK     | 2.73562 | 2.82356 | 0.0456444  | -0.055644 | 0.95563 | 0.999883 |
| gene648 | gene648 | SACOL0651 | gi 57650036 ref NC_002951.2 :681032-681662 | MVR | M36C05 | OK     | 1.4398  | 1.28344 | -0.16586   | 0.171612  | 0.86374 | 0.999883 |
| gene649 | gene649 | SACOL0652 | gi 57650036 ref NC_002951.2 :681776-682427 | MVR | M36C05 | OK     | 2.05362 | 1.22356 | -0.747078  | 0.809108  | 0.41845 | 0.999883 |
| gene65  | gene65  | SACOL0068 | gi 57650036 ref NC_002951.2 :77909-78113   | MVR | M36C05 | NOTEST | 0       | 0       | 0          | 0         | 1       | 1        |
| gene650 | gene650 | SACOL0653 | gi 57650036 ref NC_002951.2 :682463-683099 | MVR | M36C05 | OK     | 4.1147  | 2.53148 | -0.700807  | 0.877299  | 0.38032 | 0.999883 |
| gene651 | gene651 | SACOL0654 | gi 57650036 ref NC_002951.2 :683333-683960 | MVR | M36C05 | OK     | 2.17576 | 1.29247 | -0.751387  | 0.813775  | 0.41577 | 0.999883 |
| gene652 | gene652 | SACOL0655 | gi 57650036 ref NC_002951.2 :684229-685168 | MVR | M36C05 | OK     | 236.113 | 281.006 | 0.251126   | -0.283815 | 0.77655 | 0.999883 |
| gene653 | gene653 | SACOL0656 | gi 57650036 ref NC_002951.2 :685378-685915 | MVR | M36C05 | OK     | 677.886 | 726.075 | 0.0990754  | -0.109766 | 0.9126  | 0.999883 |
| gene654 | gene654 | SACOL0657 | gi 57650036 ref NC_002951.2 :686083-686560 | MVR | M36C05 | OK     | 31.0902 | 37.0659 | 0.253632   | -0.372722 | 0.70936 | 0.999883 |
| gene655 | gene655 | SACOL0658 | gi 57650036 ref NC_002951.2 :686599-687895 | MVR | M36C05 | OK     | 44.5173 | 66.4869 | 0.578702   | -0.745886 | 0.45574 | 0.999883 |
| gene656 | gene656 | SACOL0659 | gi 57650036 ref NC_002951.2 :687922-688444 | MVR | M36C05 | OK     | 142.428 | 139.57  | -0.0292438 | 0.03893   | 0.96895 | 0.999883 |
| gene657 | gene657 | adhP      | gi 57650036 ref NC_002951.2 :688942-689953 | MVR | M36C05 | OK     | 8.17357 | 19.3078 | 1.24014    | -1.80835  | 0.07055 | 0.522414 |
| gene658 | gene658 | SACOL0661 | gi 57650036 ref NC_002951.2 :690027-690135 | MVR | M36C05 | NOTEST | 0       | 0       | 0          | 0         | 1       | 1        |
| gene659 | gene659 | SACOL0662 | gi 57650036 ref NC_002951.2 :690215-692302 | MVR | M36C05 | OK     | 65.8382 | 51.4992 | -0.354373  | 0.158448  | 0.8741  | 0.999883 |
| gene66  | gene66  | SACOL0069 | gi 57650036 ref NC_002951.2 :78161-78458   | MVR | M36C05 | OK     | 0.64311 | 1.04359 | 0.698417   | -0.298794 | 0.7651  | 0.999883 |
| gene660 | gene660 | argS      | gi 57650036 ref NC_002951.2 :690215-692302 | MVR | M36C05 | OK     | 72.8042 | 41.4644 | -0.812149  | 0.922341  | 0.35635 | 0.999883 |
| gene661 | gene661 | SACOL0664 | gi 57650036 ref NC_002951.2 :692690-693326 | MVR | M36C05 | OK     | 9.93204 | 12.1511 | 0.290926   | -0.419946 | 0.67453 | 0.999883 |
| gene662 | gene662 | SACOL0665 | gi 57650036 ref NC_002951.2 :693704-694592 | MVR | M36C05 | OK     | 26.5953 | 13.9469 | -0.931224  | 1.35684   | 0.17483 | 0.821477 |
| gene663 | gene663 | SACOL0666 | gi 57650036 ref NC_002951.2 :694739-695690 | MVR | M36C05 | OK     | 13.9153 | 11.6008 | -0.262446  | 0.385801  | 0.69964 | 0.999883 |
| gene664 | gene664 | SACOL0667 | gi 57650036 ref NC_002951.2 :695744-697248 | MVR | M36C05 | OK     | 22.6321 | 20.7944 | -0.122177  | 0.105937  | 0.91563 | 0.999883 |
| gene665 | gene665 | SACOL0668 | gi 57650036 ref NC_002951.2 :695744-697248 | MVR | M36C05 | OK     | 31.0087 | 28.083  | -0.14298   | 0.155718  | 0.87626 | 0.999883 |

|         |         |           |                                            |     |        |        |         |         |              |              |          |           |
|---------|---------|-----------|--------------------------------------------|-----|--------|--------|---------|---------|--------------|--------------|----------|-----------|
| gene666 | gene666 | SACOL0669 | gi 57650036 ref NC_002951.2 :697383-697890 | MVR | M36C05 | OK     | 161.659 | 269.761 | 0.738727     | -0.946348    | 0.34397  | 0.999883  |
| gene667 | gene667 | SACOL0670 | gi 57650036 ref NC_002951.2 :698051-698768 | MVR | M36C05 | OK     | 33.9174 | 34.7876 | 0.0365464    | -0.052829    | 0.95787  | 0.999883  |
| gene668 | gene668 | SACOL0671 | gi 57650036 ref NC_002951.2 :698936-699725 | MVR | M36C05 | OK     | 76.5804 | 664.518 | 3.11726      | -3.64157     | 0.00027  | 0.0125713 |
| gene669 | gene669 | sarA      | gi 57650036 ref NC_002951.2 :699975-700350 | MVR | M36C05 | OK     | 886.334 | 5032.8  | 2.50544      | -2.72182     | 0.00649  | 0.126644  |
| gene67  | gene67  | SACOL0070 | gi 57650036 ref NC_002951.2 :78529-80204   | MVR | M36C05 | NOTEST | 0       | 0       | 0            | 0            | 1        | 1         |
| gene670 | gene670 | SACOL0673 | gi 57650036 ref NC_002951.2 :700497-700617 | MVR | M36C05 | OK     | 0       | 297.145 | 1.79769e+30  | 1.79769e+30  | 0.06916  | 0.522414  |
| gene671 | gene671 | SACOL0675 | gi 57650036 ref NC_002951.2 :701297-702191 | MVR | M36C05 | OK     | 13.7895 | 26.6988 | 0.953204     | -1.38733     | 0.16534  | 0.797722  |
| gene672 | gene672 | SACOL0676 | gi 57650036 ref NC_002951.2 :702421-702646 | MVR | M36C05 | OK     | 1.43588 | 0       | -1.79769e+30 | -1.79769e+30 | 0.22252  | 0.89416   |
| gene673 | gene673 | SACOL0677 | gi 57650036 ref NC_002951.2 :702662-702866 | MVR | M36C05 | OK     | 4.14336 | 6.56655 | 0.664334     | -0.401937    | 0.68773  | 0.999883  |
| gene674 | gene674 | SACOL0678 | gi 57650036 ref NC_002951.2 :703024-703585 | MVR | M36C05 | OK     | 7.62842 | 66.0622 | 3.11437      | -4.34484     | 1.39E-05 | 0.0010399 |
| gene675 | gene675 | SACOL0679 | gi 57650036 ref NC_002951.2 :703603-708245 | MVR | M36C05 | OK     | 5.87864 | 59.8261 | 3.34722      | -2.86468     | 0.00417  | 0.0949739 |
| gene676 | gene676 | SACOL0680 | gi 57650036 ref NC_002951.2 :703603-708245 | MVR | M36C05 | OK     | 7.73758 | 77.0386 | 3.31563      | -1.01538     | 0.30993  | 0.993387  |
| gene677 | gene677 | SACOL0681 | gi 57650036 ref NC_002951.2 :703603-708245 | MVR | M36C05 | OK     | 8.57136 | 64.6733 | 2.91557      | -0.698166    | 0.48507  | 0.999883  |
| gene678 | gene678 | SACOL0682 | gi 57650036 ref NC_002951.2 :703603-708245 | MVR | M36C05 | OK     | 11.0264 | 65.9499 | 2.58041      | -1.96346     | 0.04959  | 0.437686  |
| gene679 | gene679 | SACOL0684 | gi 57650036 ref NC_002951.2 :708245-709439 | MVR | M36C05 | OK     | 4.27596 | 17.9463 | 2.06937      | -1.21696     | 0.22362  | 0.89446   |
| gene68  | gene68  | SACOL0071 | gi 57650036 ref NC_002951.2 :78529-80204   | MVR | M36C05 | NOTEST | 0       | 0       | 0            | 0            | 1        | 1         |
| gene680 | gene680 | SACOL0685 | gi 57650036 ref NC_002951.2 :708245-709439 | MVR | M36C05 | OK     | 18.3654 | 69.6769 | 1.92369      | -1.4098      | 0.1586   | 0.778689  |
| gene681 | gene681 | SACOL0686 | gi 57650036 ref NC_002951.2 :708245-709439 | MVR | M36C05 | OK     | 17.895  | 67.1851 | 1.90859      | -2.04445     | 0.04091  | 0.394682  |
| gene682 | gene682 | SACOL0687 | gi 57650036 ref NC_002951.2 :709778-711821 | MVR | M36C05 | OK     | 40.6759 | 101.715 | 1.32229      | -1.57201     | 0.11595  | 0.672909  |
| gene683 | gene683 | SACOL0688 | gi 57650036 ref NC_002951.2 :712980-715480 | MVR | M36C05 | OK     | 265.295 | 418.025 | 0.655994     | -0.43885     | 0.66077  | 0.999883  |
| gene684 | gene684 | SACOL0689 | gi 57650036 ref NC_002951.2 :712980-715480 | MVR | M36C05 | OK     | 156.435 | 300.608 | 0.942321     | -0.475386    | 0.63451  | 0.999883  |
| gene685 | gene685 | SACOL0690 | gi 57650036 ref NC_002951.2 :712980-715480 | MVR | M36C05 | OK     | 264.117 | 505.406 | 0.936268     | -0.565591    | 0.57167  | 0.999883  |
| gene686 | gene686 | sirR      | gi 57650036 ref NC_002951.2 :715601-716246 | MVR | M36C05 | OK     | 166.212 | 137.65  | -0.272013    | 0.347073     | 0.72854  | 0.999883  |
| gene687 | gene687 | SACOL0692 | gi 57650036 ref NC_002951.2 :716325-717078 | MVR | M36C05 | OK     | 11.0526 | 9.97527 | -0.147957    | 0.215727     | 0.8292   | 0.999883  |
| gene688 | gene688 | tagA      | gi 57650036 ref NC_002951.2 :717313-718078 | MVR | M36C05 | OK     | 24.8574 | 18.7451 | -0.407159    | 0.596281     | 0.55099  | 0.999883  |
| gene689 | gene689 | SACOL0694 | gi 57650036 ref NC_002951.2 :718138-718933 | MVR | M36C05 | OK     | 78.9505 | 65.8178 | -0.262469    | 0.350811     | 0.72573  | 0.999883  |
| gene69  | gene69  | SACOL0072 | gi 57650036 ref NC_002951.2 :80405-81266   | MVR | M36C05 | NOTEST | 0       | 0       | 0            | 0            | 1        | 1         |
| gene690 | gene690 | SACOL0695 | gi 57650036 ref NC_002951.2 :719279-720092 | MVR | M36C05 | OK     | 100.463 | 63.5226 | -0.661329    | 0.871636     | 0.38341  | 0.999883  |
| gene691 | gene691 | tagB      | gi 57650036 ref NC_002951.2 :720190-722352 | MVR | M36C05 | OK     | 34.8224 | 37.0785 | 0.0905704    | -0.087181    | 0.93053  | 0.999883  |
| gene692 | gene692 | tagX      | gi 57650036 ref NC_002951.2 :720190-722352 | MVR | M36C05 | OK     | 33.8455 | 26.7348 | -0.340245    | 0.292433     | 0.76996  | 0.999883  |
| gene693 | gene693 | tagD      | gi 57650036 ref NC_002951.2 :722414-722813 | MVR | M36C05 | OK     | 53.4439 | 22.0818 | -1.27516     | 1.85524      | 0.06356  | 0.504383  |
| gene694 | gene694 | pbp4      | gi 57650036 ref NC_002951.2 :722929-724225 | MVR | M36C05 | OK     | 19.6946 | 16.6972 | -0.238194    | 0.341864     | 0.73245  | 0.999883  |
| gene695 | gene695 | abcA      | gi 57650036 ref NC_002951.2 :724645-726373 | MVR | M36C05 | OK     | 47.1325 | 79.9939 | 0.763168     | -0.93288     | 0.35088  | 0.999883  |

|         |         |           |                                            |     |        |        |         |         |           |           |         |          |
|---------|---------|-----------|--------------------------------------------|-----|--------|--------|---------|---------|-----------|-----------|---------|----------|
| gene696 | gene696 | SACOL0701 | gi 57650036 ref NC_002951.2 :726731-727961 | MVR | M36C05 | OK     | 75.9809 | 58.8698 | -0.368109 | 0.46743   | 0.64019 | 0.999883 |
| gene697 | gene697 | SACOL0702 | gi 57650036 ref NC_002951.2 :728215-728308 | MVR | M36C05 | NOTEST | 0       | 0       | 0         | 0         | 1       | 1        |
| gene698 | gene698 | SACOL0703 | gi 57650036 ref NC_002951.2 :728485-729319 | MVR | M36C05 | OK     | 44.0938 | 30.6208 | -0.526063 | 0.745891  | 0.45573 | 0.999883 |
| gene699 | gene699 | SACOL0704 | gi 57650036 ref NC_002951.2 :729600-730398 | MVR | M36C05 | OK     | 40.6442 | 53.3121 | 0.391414  | -0.546553 | 0.58469 | 0.999883 |
| gene7   | gene7   | hutH      | gi 57650036 ref NC_002951.2 :10919-12434   | MVR | M36C05 | OK     | 16.4903 | 9.38816 | -0.812701 | 1.17488   | 0.24004 | 0.911371 |
| gene70  | gene70  | SACOL0073 | gi 57650036 ref NC_002951.2 :81620-82154   | MVR | M36C05 | NOTEST | 0       | 0       | 0         | 0         | 1       | 1        |
| gene700 | gene700 | SACOL0705 | gi 57650036 ref NC_002951.2 :730433-732451 | MVR | M36C05 | OK     | 11.6057 | 15.0683 | 0.37668   | -0.245525 | 0.80605 | 0.999883 |
| gene701 | gene701 | SACOL0706 | gi 57650036 ref NC_002951.2 :730433-732451 | MVR | M36C05 | OK     | 45.4995 | 35.2273 | -0.369155 | 0.425957  | 0.67014 | 0.999883 |
| gene702 | gene702 | SACOL0707 | gi 57650036 ref NC_002951.2 :732687-733653 | MVR | M36C05 | OK     | 27.347  | 35.8478 | 0.390501  | -0.552357 | 0.5807  | 0.999883 |
| gene703 | gene703 | SACOL0708 | gi 57650036 ref NC_002951.2 :733694-734634 | MVR | M36C05 | OK     | 39.8246 | 58.7835 | 0.561754  | -0.706327 | 0.47999 | 0.999883 |
| gene704 | gene704 | SACOL0709 | gi 57650036 ref NC_002951.2 :733694-734634 | MVR | M36C05 | OK     | 21.321  | 42.7183 | 1.00258   | -0.640962 | 0.52155 | 0.999883 |
| gene705 | gene705 | SACOL0710 | gi 57650036 ref NC_002951.2 :734749-735247 | MVR | M36C05 | OK     | 445.163 | 408.333 | -0.124589 | 0.1476    | 0.88266 | 0.999883 |
| gene706 | gene706 | SACOL0711 | gi 57650036 ref NC_002951.2 :735702-736770 | MVR | M36C05 | OK     | 264.959 | 75.0762 | -1.81934  | 2.15527   | 0.03114 | 0.337139 |
| gene707 | gene707 | SACOL0712 | gi 57650036 ref NC_002951.2 :736920-737964 | MVR | M36C05 | OK     | 15.7608 | 8.23086 | -0.937226 | 1.37257   | 0.16989 | 0.812063 |
| gene708 | gene708 | SACOL0713 | gi 57650036 ref NC_002951.2 :738292-738721 | MVR | M36C05 | OK     | 82.2271 | 40.4293 | -1.02421  | 1.49381   | 0.13523 | 0.729769 |
| gene709 | gene709 | SACOL0714 | gi 57650036 ref NC_002951.2 :738929-739436 | MVR | M36C05 | OK     | 136.09  | 237.749 | 0.804875  | -1.04802  | 0.29463 | 0.977693 |
| gene71  | gene71  | SACOL0074 | gi 57650036 ref NC_002951.2 :82253-82988   | MVR | M36C05 | NOTEST | 0       | 0       | 0         | 0         | 1       | 1        |
| gene710 | gene710 | SACOL0715 | gi 57650036 ref NC_002951.2 :739548-740472 | MVR | M36C05 | OK     | 29.9896 | 32.903  | 0.133755  | -0.190236 | 0.84912 | 0.999883 |
| gene711 | gene711 | SACOL0716 | gi 57650036 ref NC_002951.2 :740478-742195 | MVR | M36C05 | OK     | 21.9873 | 18.4678 | -0.251658 | 0.168731  | 0.86601 | 0.999883 |
| gene712 | gene712 | SACOL0717 | gi 57650036 ref NC_002951.2 :740478-742195 | MVR | M36C05 | OK     | 40.7992 | 29.632  | -0.461386 | 0.539734  | 0.58938 | 0.999883 |
| gene713 | gene713 | SACOL0718 | gi 57650036 ref NC_002951.2 :742338-744979 | MVR | M36C05 | OK     | 257.675 | 192.576 | -0.420128 | 0.241745  | 0.80898 | 0.999883 |
| gene714 | gene714 | SACOL0720 | gi 57650036 ref NC_002951.2 :742338-744979 | MVR | M36C05 | OK     | 251.228 | 105.581 | -1.25065  | 1.08756   | 0.27679 | 0.962868 |
| gene715 | gene715 | SACOL0721 | gi 57650036 ref NC_002951.2 :745703-746321 | MVR | M36C05 | OK     | 55.1894 | 43.0435 | -0.358595 | 0.514319  | 0.60703 | 0.999883 |
| gene716 | gene716 | SACOL0722 | gi 57650036 ref NC_002951.2 :746336-747344 | MVR | M36C05 | OK     | 63.8485 | 37.2579 | -0.777108 | 1.04705   | 0.29508 | 0.978229 |
| gene717 | gene717 | SACOL0723 | gi 57650036 ref NC_002951.2 :747931-748729 | MVR | M36C05 | OK     | 1781.93 | 2444.98 | 0.456383  | -0.46864  | 0.63933 | 0.999883 |
| gene718 | gene718 | SACOL0724 | gi 57650036 ref NC_002951.2 :749089-749734 | MVR | M36C05 | OK     | 29.1599 | 22.3217 | -0.385542 | 0.565587  | 0.57167 | 0.999883 |
| gene719 | gene719 | SACOL0725 | gi 57650036 ref NC_002951.2 :750430-752581 | MVR | M36C05 | OK     | 6.19201 | 4.91426 | -0.333435 | 0.489388  | 0.62457 | 0.999883 |
| gene72  | gene72  | SACOL0075 | gi 57650036 ref NC_002951.2 :83421-84024   | MVR | M36C05 | OK     | 15.2677 | 10.9568 | -0.478661 | 0.693831  | 0.48779 | 0.999883 |
| gene720 | gene720 | sarX      | gi 57650036 ref NC_002951.2 :752660-753086 | MVR | M36C05 | OK     | 12.896  | 10.7269 | -0.265687 | 0.364709  | 0.71533 | 0.999883 |
| gene721 | gene721 | SACOL0727 | gi 57650036 ref NC_002951.2 :753275-754465 | MVR | M36C05 | OK     | 47.1997 | 56.9833 | 0.271761  | -0.306243 | 0.75942 | 0.999883 |
| gene722 | gene722 | SACOL0728 | gi 57650036 ref NC_002951.2 :753275-754465 | MVR | M36C05 | OK     | 50.7966 | 35.8585 | -0.502418 | 0.367422  | 0.71331 | 0.999883 |
| gene723 | gene723 | SACOL0730 | gi 57650036 ref NC_002951.2 :754817-755462 | MVR | M36C05 | OK     | 39.5742 | 72.6694 | 0.876789  | -1.23599  | 0.21646 | 0.89416  |
| gene724 | gene724 | SACOL0731 | gi 57650036 ref NC_002951.2 :755577-756444 | MVR | M36C05 | OK     | 32.0104 | 60.6882 | 0.922875  | -1.27765  | 0.20137 | 0.870048 |

|         |         |           |                                            |     |        |    |         |         |            |           |         |           |
|---------|---------|-----------|--------------------------------------------|-----|--------|----|---------|---------|------------|-----------|---------|-----------|
| gene725 | gene725 | SACOL0733 | gi 57650036 ref NC_002951.2 :756782-758488 | MVR | M36C05 | OK | 24.4019 | 12.0938 | -1.01273   | 1.19969   | 0.23026 | 0.899784  |
| gene726 | gene726 | SACOL0734 | gi 57650036 ref NC_002951.2 :756782-758488 | MVR | M36C05 | OK | 41.1457 | 14.9003 | -1.4654    | 1.0942    | 0.27387 | 0.958793  |
| gene727 | gene727 | SACOL0735 | gi 57650036 ref NC_002951.2 :758586-759276 | MVR | M36C05 | OK | 19.8225 | 16.4397 | -0.269959  | 0.396912  | 0.69143 | 0.999883  |
| gene728 | gene728 | SACOL0736 | gi 57650036 ref NC_002951.2 :759402-759846 | MVR | M36C05 | OK | 3.16779 | 1.80831 | -0.808833  | 0.827554  | 0.40792 | 0.999883  |
| gene729 | gene729 | SACOL0737 | gi 57650036 ref NC_002951.2 :759912-760308 | MVR | M36C05 | OK | 37.6434 | 21.288  | -0.822359  | 1.19249   | 0.23307 | 0.902479  |
| gene73  | gene73  | SACOL0076 | gi 57650036 ref NC_002951.2 :84290-87443   | MVR | M36C05 | OK | 10.6042 | 10.6344 | 0.00409499 | -0.005646 | 0.9955  | 0.999883  |
| gene730 | gene730 | SACOL0738 | gi 57650036 ref NC_002951.2 :760445-760745 | MVR | M36C05 | OK | 84.6887 | 222.143 | 1.39125    | -2.00506  | 0.04496 | 0.415523  |
| gene731 | gene731 | SACOL0739 | gi 57650036 ref NC_002951.2 :760824-761367 | MVR | M36C05 | OK | 8.97207 | 14.808  | 0.722868   | -1.02666  | 0.30458 | 0.990021  |
| gene732 | gene732 | SACOL0740 | gi 57650036 ref NC_002951.2 :761462-762029 | MVR | M36C05 | OK | 14.1393 | 38.8079 | 1.45664    | -2.11615  | 0.03433 | 0.354442  |
| gene733 | gene733 | SACOL0741 | gi 57650036 ref NC_002951.2 :762030-762489 | MVR | M36C05 | OK | 8.66501 | 23.8622 | 1.46145    | -2.04007  | 0.04134 | 0.396038  |
| gene734 | gene734 | SACOL0742 | gi 57650036 ref NC_002951.2 :762491-763175 | MVR | M36C05 | OK | 39.1451 | 170.086 | 2.11937    | -2.82164  | 0.00478 | 0.102605  |
| gene735 | gene735 | uppP      | gi 57650036 ref NC_002951.2 :763346-764222 | MVR | M36C05 | OK | 25.5599 | 14.1948 | -0.84852   | 1.23806   | 0.21569 | 0.89416   |
| gene736 | gene736 | SACOL0744 | gi 57650036 ref NC_002951.2 :764440-767742 | MVR | M36C05 | OK | 19.8973 | 56.0342 | 1.49374    | -1.29083  | 0.19676 | 0.860309  |
| gene737 | gene737 | SACOL0745 | gi 57650036 ref NC_002951.2 :764440-767742 | MVR | M36C05 | OK | 27.7513 | 33.4995 | 0.271584   | -0.223661 | 0.82302 | 0.999883  |
| gene738 | gene738 | norR      | gi 57650036 ref NC_002951.2 :767868-768312 | MVR | M36C05 | OK | 762.646 | 763.56  | 0.00172834 | -0.001964 | 0.99843 | 0.999883  |
| gene739 | gene739 | SACOL0747 | gi 57650036 ref NC_002951.2 :768538-769465 | MVR | M36C05 | OK | 14.9724 | 15.9284 | 0.0892944  | -0.131041 | 0.89574 | 0.999883  |
| gene74  | gene74  | SACOL0077 | gi 57650036 ref NC_002951.2 :87499-87982   | MVR | M36C05 | OK | 20.9297 | 24.9688 | 0.254574   | -0.372048 | 0.70986 | 0.999883  |
| gene740 | gene740 | SACOL0748 | gi 57650036 ref NC_002951.2 :769567-770476 | MVR | M36C05 | OK | 47.5484 | 49.4666 | 0.0570586  | -0.078025 | 0.93781 | 0.999883  |
| gene741 | gene741 | SACOL0749 | gi 57650036 ref NC_002951.2 :770510-770798 | MVR | M36C05 | OK | 74.3458 | 65.1883 | -0.189637  | 0.277519  | 0.78138 | 0.999883  |
| gene742 | gene742 | SACOL0750 | gi 57650036 ref NC_002951.2 :771080-772634 | MVR | M36C05 | OK | 21.7235 | 31.1789 | 0.521309   | -0.710035 | 0.47768 | 0.999883  |
| gene743 | gene743 | SACOL0751 | gi 57650036 ref NC_002951.2 :772719-774093 | MVR | M36C05 | OK | 26.6995 | 40.2821 | 0.593325   | -0.80097  | 0.42315 | 0.999883  |
| gene744 | gene744 | SACOL0752 | gi 57650036 ref NC_002951.2 :774528-775146 | MVR | M36C05 | OK | 52.3706 | 100.347 | 0.938167   | -1.2962   | 0.19491 | 0.856906  |
| gene745 | gene745 | SACOL0753 | gi 57650036 ref NC_002951.2 :775331-775754 | MVR | M36C05 | OK | 95.3468 | 137.834 | 0.531677   | -0.748927 | 0.4539  | 0.999883  |
| gene746 | gene746 | norA      | gi 57650036 ref NC_002951.2 :775962-777129 | MVR | M36C05 | OK | 22.0779 | 50.5089 | 1.19394    | -1.63563  | 0.10192 | 0.641366  |
| gene747 | gene747 | SACOL0755 | gi 57650036 ref NC_002951.2 :777421-777874 | MVR | M36C05 | OK | 2110.65 | 2494.29 | 0.240939   | -0.248592 | 0.80368 | 0.999883  |
| gene748 | gene748 | SACOL0756 | gi 57650036 ref NC_002951.2 :778047-778530 | MVR | M36C05 | OK | 9.90222 | 10.1436 | 0.0347407  | -0.048062 | 0.96167 | 0.999883  |
| gene749 | gene749 | SACOL0757 | gi 57650036 ref NC_002951.2 :778779-780461 | MVR | M36C05 | OK | 2.80996 | 4.68628 | 0.737891   | -0.673723 | 0.50049 | 0.999883  |
| gene75  | gene75  | plc       | gi 57650036 ref NC_002951.2 :88186-89173   | MVR | M36C05 | OK | 0.99634 | 1.40121 | 0.491966   | -0.569107 | 0.56928 | 0.999883  |
| gene750 | gene750 | fruK      | gi 57650036 ref NC_002951.2 :778779-780461 | MVR | M36C05 | OK | 3.10415 | 5.65964 | 0.866511   | -0.963379 | 0.33536 | 0.999883  |
| gene751 | gene751 | SACOL0759 | gi 57650036 ref NC_002951.2 :780466-782424 | MVR | M36C05 | OK | 5.97036 | 8.65121 | 0.535085   | -0.782005 | 0.43421 | 0.999883  |
| gene752 | gene752 | nagA      | gi 57650036 ref NC_002951.2 :782731-783913 | MVR | M36C05 | OK | 16.1771 | 11.3395 | -0.512595  | 0.74841   | 0.45421 | 0.999883  |
| gene753 | gene753 | SACOL0762 | gi 57650036 ref NC_002951.2 :784133-785483 | MVR | M36C05 | OK | 121.072 | 257.956 | 1.09126    | -1.22435  | 0.22082 | 0.89416   |
| gene754 | gene754 | SACOL0763 | gi 57650036 ref NC_002951.2 :785704-786544 | MVR | M36C05 | OK | 22.212  | 99.4452 | 2.16257    | -2.94364  | 0.00324 | 0.0820803 |

|         |         |             |                                            |     |        |        |         |         |             |             |          |           |
|---------|---------|-------------|--------------------------------------------|-----|--------|--------|---------|---------|-------------|-------------|----------|-----------|
| gene755 | gene755 | SACOL0764   | gi 57650036 ref NC_002951.2 :786675-787659 | MVR | M36C05 | OK     | 45.0892 | 172.447 | 1.9353      | -2.43247    | 0.015    | 0.21364   |
| gene756 | gene756 | saeS        | gi 57650036 ref NC_002951.2 :787730-789920 | MVR | M36C05 | OK     | 156.53  | 237.277 | 0.600132    | -0.448151   | 0.65405  | 0.999883  |
| gene757 | gene757 | saeR        | gi 57650036 ref NC_002951.2 :787730-789920 | MVR | M36C05 | OK     | 203.045 | 321.759 | 0.664185    | -0.428726   | 0.66812  | 0.999883  |
| gene758 | gene758 | SACOL0767   | gi 57650036 ref NC_002951.2 :787730-789920 | MVR | M36C05 | OK     | 149.128 | 233.684 | 0.648013    | -0.265642   | 0.79052  | 0.999883  |
| gene759 | gene759 | SACOL0768   | gi 57650036 ref NC_002951.2 :790261-790702 | MVR | M36C05 | OK     | 364.354 | 368.861 | 0.0177374   | -0.021972   | 0.98247  | 0.999883  |
| gene76  | gene76  | SACOL0079   | gi 57650036 ref NC_002951.2 :89393-90164   | MVR | M36C05 | OK     | 0.53445 | 1.35245 | 1.33944     | -1.26846    | 0.20463  | 0.877017  |
| gene760 | gene760 | SACOL0769   | gi 57650036 ref NC_002951.2 :790981-791566 | MVR | M36C05 | OK     | 49.5379 | 28.3881 | -0.803243   | 1.1691      | 0.24237  | 0.913772  |
| gene761 | gene761 | SACOL0770   | gi 57650036 ref NC_002951.2 :791664-792378 | MVR | M36C05 | OK     | 23.5056 | 24.0429 | 0.0326016   | -0.047769   | 0.9619   | 0.999883  |
| gene762 | gene762 | SACOL0771   | gi 57650036 ref NC_002951.2 :792381-792801 | MVR | M36C05 | OK     | 14.1559 | 10.5134 | -0.429176   | 0.589447    | 0.55556  | 0.999883  |
| gene763 | gene763 | SACOL0772   | gi 57650036 ref NC_002951.2 :792802-793471 | MVR | M36C05 | OK     | 16.5533 | 7.0591  | -1.22956    | 1.76856     | 0.07697  | 0.551492  |
| gene764 | gene764 | pabA        | gi 57650036 ref NC_002951.2 :793821-796158 | MVR | M36C05 | OK     | 5.68661 | 2.52169 | -1.17318    | 0.687985    | 0.49146  | 0.999883  |
| gene765 | gene765 | SACOL0774   | gi 57650036 ref NC_002951.2 :793821-796158 | MVR | M36C05 | OK     | 6.20674 | 3.74451 | -0.72906    | 0.977483    | 0.32833  | 0.999883  |
| gene766 | gene766 | SACOL0776   | gi 57650036 ref NC_002951.2 :796517-798216 | MVR | M36C05 | OK     | 11.2849 | 12.3081 | 0.125204    | -0.109024   | 0.91318  | 0.999883  |
| gene767 | gene767 | SACOL0777   | gi 57650036 ref NC_002951.2 :796517-798216 | MVR | M36C05 | OK     | 14.6757 | 11.3697 | -0.368226   | 0.424364    | 0.6713   | 0.999883  |
| gene768 | gene768 | SACOL0778   | gi 57650036 ref NC_002951.2 :798689-800630 | MVR | M36C05 | OK     | 319.391 | 143.127 | -1.15803    | 1.23124     | 0.21824  | 0.89416   |
| gene769 | gene769 | SACOL0779   | gi 57650036 ref NC_002951.2 :800906-802784 | MVR | M36C05 | OK     | 36.9533 | 36.978  | 0.00096187  | -0.001236   | 0.99901  | 0.999883  |
| gene77  | gene77  | SACOL0080   | gi 57650036 ref NC_002951.2 :90215-90986   | MVR | M36C05 | NOTEST | 0.32067 | 0.57962 | 0.85401     | -0.632213   | 0.52725  | 1         |
| gene770 | gene770 | recQ1       | gi 57650036 ref NC_002951.2 :802795-804577 | MVR | M36C05 | OK     | 56.3484 | 43.9606 | -0.358165   | 0.447498    | 0.65452  | 0.999883  |
| gene771 | gene771 | SACOL0781   | gi 57650036 ref NC_002951.2 :804798-807283 | MVR | M36C05 | OK     | 23.577  | 104.182 | 2.14365     | -1.53571    | 0.12461  | 0.699617  |
| gene772 | gene772 | opuBB       | gi 57650036 ref NC_002951.2 :804798-807283 | MVR | M36C05 | OK     | 30.7607 | 91.0316 | 1.56528     | -1.49399    | 0.13518  | 0.729769  |
| gene773 | gene773 | hisC        | gi 57650036 ref NC_002951.2 :807522-808581 | MVR | M36C05 | OK     | 10.0851 | 47.8801 | 2.24721     | -3.14709    | 0.00165  | 0.0501425 |
| gene774 | gene774 | SACOL0785   | gi 57650036 ref NC_002951.2 :808931-809474 | MVR | M36C05 | OK     | 25.8176 | 61.4856 | 1.25189     | -1.81437    | 0.06962  | 0.522414  |
| gene775 | gene775 | SACOL0786   | gi 57650036 ref NC_002951.2 :809586-809748 | MVR | M36C05 | OK     | 0       | 560.512 | 1.79769e+30 | 1.79769e+30 | 0.00145  | 0.0454417 |
| gene776 | gene776 | SACOL0787   | gi 57650036 ref NC_002951.2 :810153-811071 | MVR | M36C05 | OK     | 31.4284 | 320.723 | 3.35119     | -4.14308    | 3.43E-05 | 0.0022544 |
| gene777 | gene777 | SACOL0788   | gi 57650036 ref NC_002951.2 :811340-812846 | MVR | M36C05 | OK     | 146.443 | 56.7174 | -1.36848    | 1.62668     | 0.10381  | 0.645527  |
| gene778 | gene778 | SACOL0789   | gi 57650036 ref NC_002951.2 :813186-813687 | MVR | M36C05 | OK     | 37.0683 | 12.106  | -1.61447    | 2.33212     | 0.01969  | 0.25867   |
| gene779 | gene779 | SACOL0790   | gi 57650036 ref NC_002951.2 :813706-814573 | MVR | M36C05 | OK     | 28.3729 | 10.5832 | -1.42273    | 2.06931     | 0.03852  | 0.382368  |
| gene78  | gene78  | SACOL0081   | gi 57650036 ref NC_002951.2 :91049-91214   | MVR | M36C05 | NOTEST | 0       | 0       | 0           | 0           | 1        | 1         |
| gene780 | gene780 | SACOL0790.1 | gi 57650036 ref NC_002951.2 :814957-815224 | MVR | M36C05 | OK     | 303.103 | 162.198 | -0.902052   | 1.3039      | 0.19227  | 0.852075  |
| gene781 | gene781 | nrdI        | gi 57650036 ref NC_002951.2 :815373-817840 | MVR | M36C05 | OK     | 629.523 | 636.509 | 0.0159232   | -0.005638   | 0.9955   | 0.999883  |
| gene782 | gene782 | nrdE        | gi 57650036 ref NC_002951.2 :815373-817840 | MVR | M36C05 | OK     | 531.103 | 384.04  | -0.467736   | 0.446967    | 0.6549   | 0.999883  |
| gene783 | gene783 | nrdF        | gi 57650036 ref NC_002951.2 :817957-818929 | MVR | M36C05 | OK     | 929.536 | 284.551 | -1.70782    | 1.81861     | 0.06897  | 0.522414  |
| gene784 | gene784 | SACOL0794   | gi 57650036 ref NC_002951.2 :819061-819166 | MVR | M36C05 | NOTEST | 0       | 0       | 0           | 0           | 1        | 1         |



|         |         |           |                                            |     |        |        |         |         |            |           |         |          |
|---------|---------|-----------|--------------------------------------------|-----|--------|--------|---------|---------|------------|-----------|---------|----------|
| gene785 | gene785 | SACOL0796 | gi 57650036 ref NC_002951.2 :819636-822309 | MVR | M36C05 | OK     | 2.50169 | 1.28562 | -0.960438  | 0.848667  | 0.39607 | 0.999883 |
| gene786 | gene786 | SACOL0797 | gi 57650036 ref NC_002951.2 :819636-822309 | MVR | M36C05 | OK     | 1.43599 | 1.74817 | 0.283799   | -0.232614 | 0.81606 | 0.999883 |
| gene787 | gene787 | SACOL0798 | gi 57650036 ref NC_002951.2 :819636-822309 | MVR | M36C05 | OK     | 1.84752 | 0.98153 | -0.912492  | 0.594702  | 0.55204 | 0.999883 |
| gene788 | gene788 | SACOL0799 | gi 57650036 ref NC_002951.2 :822427-823456 | MVR | M36C05 | OK     | 6.68327 | 3.19236 | -1.06593   | 1.50921   | 0.13125 | 0.718382 |
| gene789 | gene789 | SACOL0800 | gi 57650036 ref NC_002951.2 :823772-824087 | MVR | M36C05 | OK     | 11.7047 | 13.6461 | 0.221401   | -0.279769 | 0.77966 | 0.999883 |
| gene79  | gene79  | SACOL0082 | gi 57650036 ref NC_002951.2 :91226-91823   | MVR | M36C05 | NOTEST | 0.15669 | 0.55613 | 1.82748    | -0.859942 | 0.38982 | 1        |
| gene790 | gene790 | murB      | gi 57650036 ref NC_002951.2 :824104-825028 | MVR | M36C05 | OK     | 23.4738 | 21.6307 | -0.117972  | 0.171142  | 0.86411 | 0.999883 |
| gene791 | gene791 | SACOL0802 | gi 57650036 ref NC_002951.2 :825154-825673 | MVR | M36C05 | OK     | 14.6437 | 13.846  | -0.0808079 | 0.116304  | 0.90741 | 0.999883 |
| gene792 | gene792 | SACOL0803 | gi 57650036 ref NC_002951.2 :825792-826671 | MVR | M36C05 | OK     | 16.7834 | 13.9696 | -0.264746  | 0.388914  | 0.69734 | 0.999883 |
| gene793 | gene793 | SACOL0804 | gi 57650036 ref NC_002951.2 :826824-827145 | MVR | M36C05 | OK     | 70.8922 | 232.721 | 1.7149     | -2.44657  | 0.01442 | 0.207918 |
| gene794 | gene794 | SACOL0805 | gi 57650036 ref NC_002951.2 :827569-828694 | MVR | M36C05 | OK     | 35.0495 | 45.5334 | 0.37753    | -0.512022 | 0.60864 | 0.999883 |
| gene795 | gene795 | pepT      | gi 57650036 ref NC_002951.2 :828882-830109 | MVR | M36C05 | OK     | 94.2251 | 100.157 | 0.0880727  | -0.107021 | 0.91477 | 0.999883 |
| gene796 | gene796 | SACOL0807 | gi 57650036 ref NC_002951.2 :830122-830617 | MVR | M36C05 | OK     | 10.5459 | 12.7263 | 0.271124   | -0.381625 | 0.70274 | 0.999883 |
| gene797 | gene797 | SACOL0808 | gi 57650036 ref NC_002951.2 :830634-831396 | MVR | M36C05 | OK     | 6.62935 | 8.83375 | 0.414159   | -0.59389  | 0.55259 | 0.999883 |
| gene798 | gene798 | SACOL0809 | gi 57650036 ref NC_002951.2 :831591-832662 | MVR | M36C05 | OK     | 21.2653 | 22.0275 | 0.0508008  | -0.073174 | 0.94167 | 0.999883 |
| gene799 | gene799 | SACOL0810 | gi 57650036 ref NC_002951.2 :832979-834035 | MVR | M36C05 | OK     | 19.9617 | 11.3357 | -0.816355  | 1.19118   | 0.23358 | 0.902568 |
| gene8   | gene8   | serS      | gi 57650036 ref NC_002951.2 :12812-14099   | MVR | M36C05 | OK     | 46.1596 | 57.0988 | 0.30683    | -0.398766 | 0.69007 | 0.999883 |
| gene80  | gene80  | SACOL0083 | gi 57650036 ref NC_002951.2 :91889-92657   | MVR | M36C05 | NOTEST | 0.10748 | 0.38846 | 1.85369    | -0.872277 | 0.38306 | 1        |
| gene800 | gene800 | SACOL0811 | gi 57650036 ref NC_002951.2 :834204-834846 | MVR | M36C05 | OK     | 69.6464 | 93.8891 | 0.43091    | -0.587262 | 0.55703 | 0.999883 |
| gene801 | gene801 | SACOL0812 | gi 57650036 ref NC_002951.2 :834989-835856 | MVR | M36C05 | OK     | 91.6662 | 45.9709 | -0.995668  | 1.32826   | 0.18409 | 0.834616 |
| gene802 | gene802 | SACOL0813 | gi 57650036 ref NC_002951.2 :836219-837969 | MVR | M36C05 | OK     | 3.8805  | 2.49745 | -0.635788  | 0.759583  | 0.4475  | 0.999883 |
| gene803 | gene803 | SACOL0814 | gi 57650036 ref NC_002951.2 :836219-837969 | MVR | M36C05 | OK     | 1.68517 | 2.78791 | 0.726286   | -0.51221  | 0.6085  | 0.999883 |
| gene804 | gene804 | SACOL0815 | gi 57650036 ref NC_002951.2 :838029-838602 | MVR | M36C05 | OK     | 816.584 | 1142.22 | 0.484171   | -0.515428 | 0.60625 | 0.999883 |
| gene805 | gene805 | secA      | gi 57650036 ref NC_002951.2 :839015-841547 | MVR | M36C05 | OK     | 120.252 | 81.2764 | -0.565158  | 0.625687  | 0.53152 | 0.999883 |
| gene806 | gene806 | SACOL0817 | gi 57650036 ref NC_002951.2 :841588-841693 | MVR | M36C05 | NOTEST | 0       | 0       | 0          | 0         | 1       | 1        |
| gene807 | gene807 | prfB      | gi 57650036 ref NC_002951.2 :841861-842972 | MVR | M36C05 | OK     | 37.976  | 27.9581 | -0.441822  | 0.612788  | 0.54002 | 0.999883 |
| gene808 | gene808 | SACOL0819 | gi 57650036 ref NC_002951.2 :843125-843233 | MVR | M36C05 | NOTEST | 0       | 0       | 0          | 0         | 1       | 1        |
| gene809 | gene809 | SACOL0820 | gi 57650036 ref NC_002951.2 :843380-844220 | MVR | M36C05 | OK     | 5.7903  | 8.78978 | 0.602191   | -0.865875 | 0.38656 | 0.999883 |
| gene81  | gene81  | SACOL0084 | gi 57650036 ref NC_002951.2 :92789-94988   | MVR | M36C05 | OK     | 13.8304 | 20.563  | 0.572211   | -0.782554 | 0.43389 | 0.999883 |
| gene810 | gene810 | SACOL0821 | gi 57650036 ref NC_002951.2 :844393-845277 | MVR | M36C05 | OK     | 14.9229 | 20.5559 | 0.462017   | -0.648403 | 0.51672 | 0.999883 |
| gene811 | gene811 | SACOL0822 | gi 57650036 ref NC_002951.2 :844393-845277 | MVR | M36C05 | OK     | 12.0852 | 15.3695 | 0.346827   | -0.148108 | 0.88226 | 0.999883 |
| gene812 | gene812 | uvrB      | gi 57650036 ref NC_002951.2 :845539-847531 | MVR | M36C05 | OK     | 56.306  | 55.6574 | -0.0167147 | 0.020285  | 0.98382 | 0.999883 |
| gene813 | gene813 | uvrA      | gi 57650036 ref NC_002951.2 :847538-850385 | MVR | M36C05 | OK     | 65.8737 | 43.0439 | -0.613892  | 0.715759  | 0.47414 | 0.999883 |

|         |         |             |                                            |     |        |        |         |         |            |           |         |           |
|---------|---------|-------------|--------------------------------------------|-----|--------|--------|---------|---------|------------|-----------|---------|-----------|
| gene814 | gene814 | hprK        | gi 57650036 ref NC_002951.2 :850991-851924 | MVR | M36C05 | OK     | 68.5381 | 118.71  | 0.792463   | -1.0092   | 0.31288 | 0.994633  |
| gene815 | gene815 | lgt         | gi 57650036 ref NC_002951.2 :851929-852769 | MVR | M36C05 | OK     | 35.5961 | 60.8391 | 0.77328    | -1.07053  | 0.28438 | 0.97125   |
| gene816 | gene816 | SACOL0827   | gi 57650036 ref NC_002951.2 :852776-853262 | MVR | M36C05 | OK     | 30.9293 | 38.6057 | 0.319838   | -0.469817 | 0.63849 | 0.999883  |
| gene817 | gene817 | SACOL0828   | gi 57650036 ref NC_002951.2 :853269-854709 | MVR | M36C05 | OK     | 31.9361 | 20.8906 | -0.612331  | 0.842055  | 0.39976 | 0.999883  |
| gene818 | gene818 | trxB        | gi 57650036 ref NC_002951.2 :854775-855711 | MVR | M36C05 | OK     | 233.083 | 562.957 | 1.27218    | -1.39082  | 0.16428 | 0.794505  |
| gene819 | gene819 | SACOL0830   | gi 57650036 ref NC_002951.2 :856420-858324 | MVR | M36C05 | OK     | 37.3119 | 79.6181 | 1.09346    | -0.677881 | 0.49785 | 0.999883  |
| gene82  | gene82  | SACOL0085   | gi 57650036 ref NC_002951.2 :95138-96317   | MVR | M36C05 | OK     | 4.40909 | 9.79766 | 1.15195    | -1.67355  | 0.09422 | 0.615952  |
| gene820 | gene820 | SACOL0831   | gi 57650036 ref NC_002951.2 :856420-858324 | MVR | M36C05 | OK     | 41.8131 | 256.844 | 2.61887    | -2.53076  | 0.01138 | 0.182229  |
| gene821 | gene821 | SACOL0832   | gi 57650036 ref NC_002951.2 :858433-859378 | MVR | M36C05 | OK     | 53.8533 | 225.301 | 2.06475    | -2.54553  | 0.01091 | 0.176027  |
| gene823 | gene823 | clpP        | gi 57650036 ref NC_002951.2 :859950-860538 | MVR | M36C05 | OK     | 430.777 | 633.075 | 0.555434   | -0.624738 | 0.53214 | 0.999883  |
| gene824 | gene824 | SACOL0834   | gi 57650036 ref NC_002951.2 :860780-861683 | MVR | M36C05 | OK     | 22.8216 | 112.016 | 2.29523    | -3.07401  | 0.00211 | 0.0599397 |
| gene825 | gene825 | SACOL0835   | gi 57650036 ref NC_002951.2 :862386-863016 | MVR | M36C05 | OK     | 45.2098 | 221.264 | 2.29106    | -3.0182   | 0.00254 | 0.0691808 |
| gene826 | gene826 | SACOL0836   | gi 57650036 ref NC_002951.2 :863204-863351 | MVR | M36C05 | NOTEST | 0       | 0       | 0          | 0         | 1       | 1         |
| gene827 | gene827 | gapR        | gi 57650036 ref NC_002951.2 :863775-864789 | MVR | M36C05 | OK     | 66.6208 | 359.669 | 2.43263    | -2.86586  | 0.00416 | 0.0949445 |
| gene828 | gene828 | gapA1       | gi 57650036 ref NC_002951.2 :864841-865852 | MVR | M36C05 | OK     | 302.645 | 1562.03 | 2.36772    | -2.51447  | 0.01192 | 0.186337  |
| gene829 | gene829 | pgk         | gi 57650036 ref NC_002951.2 :865990-867181 | MVR | M36C05 | OK     | 68.7632 | 317.513 | 2.20711    | -2.56246  | 0.01039 | 0.172118  |
| gene83  | gene83  | SACOL0086   | gi 57650036 ref NC_002951.2 :96318-97707   | MVR | M36C05 | OK     | 3.2129  | 8.34409 | 1.37688    | -1.99163  | 0.04641 | 0.423595  |
| gene830 | gene830 | tpiA        | gi 57650036 ref NC_002951.2 :867302-868064 | MVR | M36C05 | OK     | 87.9204 | 403.604 | 2.19867    | -2.64     | 0.00829 | 0.148512  |
| gene831 | gene831 | pgm         | gi 57650036 ref NC_002951.2 :868066-869584 | MVR | M36C05 | OK     | 79.8196 | 292.043 | 1.87137    | -2.10235  | 0.03552 | 0.360558  |
| gene832 | gene832 | eno         | gi 57650036 ref NC_002951.2 :869713-871018 | MVR | M36C05 | OK     | 295.773 | 425.4   | 0.52433    | -0.553401 | 0.57999 | 0.999883  |
| gene833 | gene833 | SACOL0843   | gi 57650036 ref NC_002951.2 :871357-871816 | MVR | M36C05 | OK     | 33.1746 | 46.0199 | 0.472178   | -0.692937 | 0.48835 | 0.999883  |
| gene834 | gene834 | secG        | gi 57650036 ref NC_002951.2 :871882-872116 | MVR | M36C05 | OK     | 1119.44 | 436.036 | -1.36025   | 1.84749   | 0.06468 | 0.508207  |
| gene835 | gene835 | est         | gi 57650036 ref NC_002951.2 :872231-872972 | MVR | M36C05 | OK     | 33.927  | 31.8143 | -0.0927584 | 0.134077  | 0.89334 | 0.999883  |
| gene836 | gene836 | SACOL0846   | gi 57650036 ref NC_002951.2 :873005-875378 | MVR | M36C05 | OK     | 64.4246 | 91.8913 | 0.512318   | -0.586308 | 0.55767 | 0.999883  |
| gene837 | gene837 | smpB        | gi 57650036 ref NC_002951.2 :875399-875864 | MVR | M36C05 | OK     | 93.4766 | 119.125 | 0.349797   | -0.489311 | 0.62462 | 0.999883  |
| gene838 | gene838 | SACOL_Satml | gi 57650036 ref NC_002951.2 :875954-876313 | MVR | M36C05 | OK     | 162613  | 193158  | 0.248344   | -0.396094 | 0.69204 | 0.999883  |
| gene839 | gene839 | SACOL0848   | gi 57650036 ref NC_002951.2 :876637-876919 | MVR | M36C05 | OK     | 10.2688 | 13.0235 | 0.342851   | -0.403696 | 0.68644 | 0.999883  |
| gene84  | gene84  | SACOL0087   | gi 57650036 ref NC_002951.2 :97874-97982   | MVR | M36C05 | NOTEST | 0       | 0       | 0          | 0         | 1       | 1         |
| gene840 | gene840 | SACOL0849   | gi 57650036 ref NC_002951.2 :877185-877509 | MVR | M36C05 | OK     | 37.0277 | 26.4605 | -0.484765  | 0.690385  | 0.48995 | 0.999883  |
| gene841 | gene841 | SACOL0850   | gi 57650036 ref NC_002951.2 :877524-877671 | MVR | M36C05 | NOTEST | 0       | 0       | 0          | 0         | 1       | 1         |
| gene842 | gene842 | SACOL0851   | gi 57650036 ref NC_002951.2 :877862-878591 | MVR | M36C05 | OK     | 3.8206  | 4.38    | 0.197132   | -0.264697 | 0.79124 | 0.999883  |
| gene843 | gene843 | SACOL0853   | gi 57650036 ref NC_002951.2 :879026-879182 | MVR | M36C05 | NOTEST | 0       | 0       | 0          | 0         | 1       | 1         |
| gene844 | gene844 | SACOL0854   | gi 57650036 ref NC_002951.2 :879189-879711 | MVR | M36C05 | OK     | 1.95912 | 5.82971 | 1.57322    | -1.82132  | 0.06856 | 0.522414  |

|         |         |           |                                            |     |        |        |         |         |           |           |          |           |
|---------|---------|-----------|--------------------------------------------|-----|--------|--------|---------|---------|-----------|-----------|----------|-----------|
| gene845 | gene845 | SACOL0855 | gi 57650036 ref NC_002951.2 :879849-880380 | MVR | M36C05 | OK     | 3.0434  | 8.00628 | 1.39545   | -1.75762  | 0.07881  | 0.558089  |
| gene846 | gene846 | clfA      | gi 57650036 ref NC_002951.2 :880642-883444 | MVR | M36C05 | OK     | 93.3653 | 1037.04 | 3.47344   | -3.76697  | 0.00017  | 0.0087287 |
| gene847 | gene847 | SACOL0857 | gi 57650036 ref NC_002951.2 :883664-885191 | MVR | M36C05 | OK     | 1.16703 | 0.99677 | -0.227507 | 0.287661  | 0.77361  | 0.999883  |
| gene848 | gene848 | empbp     | gi 57650036 ref NC_002951.2 :885541-886564 | MVR | M36C05 | OK     | 3.73267 | 2.54573 | -0.552129 | 0.755589  | 0.4499   | 0.999883  |
| gene849 | gene849 | SACOL0859 | gi 57650036 ref NC_002951.2 :886898-887369 | MVR | M36C05 | OK     | 1.41474 | 1.22203 | -0.211248 | 0.189162  | 0.84997  | 0.999883  |
| gene85  | gene85  | SACOL0088 | gi 57650036 ref NC_002951.2 :98199-99861   | MVR | M36C05 | OK     | 76.18   | 188.55  | 1.30746   | -1.48982  | 0.13627  | 0.732537  |
| gene850 | gene850 | nuc       | gi 57650036 ref NC_002951.2 :887709-888396 | MVR | M36C05 | OK     | 8.33392 | 5.89137 | -0.500393 | 0.70508   | 0.48076  | 0.999883  |
| gene851 | gene851 | SACOL0861 | gi 57650036 ref NC_002951.2 :888752-888953 | MVR | M36C05 | OK     | 18765.9 | 6839.93 | -1.45606  | 1.56228   | 0.11822  | 0.68227   |
| gene852 | gene852 | SACOL0862 | gi 57650036 ref NC_002951.2 :889448-889667 | MVR | M36C05 | OK     | 26.8453 | 72.5393 | 1.43409   | -1.83441  | 0.06659  | 0.515441  |
| gene853 | gene853 | SACOL0863 | gi 57650036 ref NC_002951.2 :889728-890013 | MVR | M36C05 | OK     | 5.70951 | 31.1372 | 2.4472    | -2.78121  | 0.00542  | 0.113604  |
| gene854 | gene854 | SACOL0864 | gi 57650036 ref NC_002951.2 :890100-890670 | MVR | M36C05 | OK     | 6.5864  | 0.89518 | -2.87924  | 3.0234    | 0.0025   | 0.0687796 |
| gene855 | gene855 | SACOL0865 | gi 57650036 ref NC_002951.2 :891074-891335 | MVR | M36C05 | OK     | 28.9497 | 39.128  | 0.434651  | -0.589995 | 0.55519  | 0.999883  |
| gene856 | gene856 | SACOL0866 | gi 57650036 ref NC_002951.2 :891639-891744 | MVR | M36C05 | NOTEST | 0       | 0       | 0         | 0         | 1        | 1         |
| gene857 | gene857 | SACOL0868 | gi 57650036 ref NC_002951.2 :891875-892112 | MVR | M36C05 | OK     | 39.8813 | 528.328 | 3.72765   | -5.04833  | 4.46E-07 | 5.86E-05  |
| gene858 | gene858 | SACOL0869 | gi 57650036 ref NC_002951.2 :892327-892918 | MVR | M36C05 | OK     | 8.28096 | 9.03492 | 0.125713  | -0.177059 | 0.85946  | 0.999883  |
| gene859 | gene859 | SACOL0870 | gi 57650036 ref NC_002951.2 :892990-893608 | MVR | M36C05 | OK     | 35.9028 | 59.68   | 0.733151  | -1.05073  | 0.29338  | 0.976946  |
| gene86  | gene86  | SACOL0089 | gi 57650036 ref NC_002951.2 :100186-101962 | MVR | M36C05 | OK     | 4.86145 | 22.4486 | 2.20717   | -3.11626  | 0.00183  | 0.0540416 |
| gene860 | gene860 | SACOL0871 | gi 57650036 ref NC_002951.2 :893762-894257 | MVR | M36C05 | OK     | 14.2047 | 96.1957 | 2.7596    | -3.89027  | 0.0001   | 0.005706  |
| gene861 | gene861 | SACOL0872 | gi 57650036 ref NC_002951.2 :894655-895078 | MVR | M36C05 | OK     | 15.988  | 189.707 | 3.56871   | -4.88807  | 1.02E-06 | 0.000117  |
| gene862 | gene862 | aroD      | gi 57650036 ref NC_002951.2 :895225-895942 | MVR | M36C05 | OK     | 8.42005 | 11.3113 | 0.425863  | -0.616221 | 0.53775  | 0.999883  |
| gene863 | gene863 | SACOL0874 | gi 57650036 ref NC_002951.2 :896024-896564 | MVR | M36C05 | OK     | 33.2696 | 40.5947 | 0.287086  | -0.420288 | 0.67428  | 0.999883  |
| gene864 | gene864 | SACOL0875 | gi 57650036 ref NC_002951.2 :896713-897034 | MVR | M36C05 | OK     | 118.864 | 210.93  | 0.827449  | -1.18349  | 0.23662  | 0.90647   |
| gene865 | gene865 | SACOL0876 | gi 57650036 ref NC_002951.2 :897177-897534 | MVR | M36C05 | OK     | 75.1591 | 81.5563 | 0.117848  | -0.172686 | 0.8629   | 0.999883  |
| gene866 | gene866 | gcvH      | gi 57650036 ref NC_002951.2 :897691-898072 | MVR | M36C05 | OK     | 546.626 | 888.853 | 0.701391  | -0.832708 | 0.40501  | 0.999883  |
| gene867 | gene867 | SACOL0879 | gi 57650036 ref NC_002951.2 :898250-899129 | MVR | M36C05 | OK     | 65.0803 | 18.3554 | -1.82602  | 2.54656   | 0.01088  | 0.176027  |
| gene868 | gene868 | SACOL0880 | gi 57650036 ref NC_002951.2 :899870-900546 | MVR | M36C05 | OK     | 37.7792 | 27.5473 | -0.455682 | 0.532     | 0.59473  | 0.999883  |
| gene869 | gene869 | SACOL0881 | gi 57650036 ref NC_002951.2 :899870-900546 | MVR | M36C05 | OK     | 35.3709 | 32.3512 | -0.128747 | 0.11436   | 0.90895  | 0.999883  |
| gene87  | gene87  | SACOL0090 | gi 57650036 ref NC_002951.2 :102135-103008 | MVR | M36C05 | NOTEST | 0       | 0       | 0         | 0         | 1        | 1         |
| gene870 | gene870 | SACOL0882 | gi 57650036 ref NC_002951.2 :900795-902509 | MVR | M36C05 | OK     | 11.302  | 20.0248 | 0.825213  | -0.98574  | 0.32426  | 0.999883  |
| gene871 | gene871 | SACOL0883 | gi 57650036 ref NC_002951.2 :900795-902509 | MVR | M36C05 | OK     | 8.91831 | 14.4607 | 0.697295  | -0.557528 | 0.57717  | 0.999883  |
| gene872 | gene872 | SACOL0884 | gi 57650036 ref NC_002951.2 :902526-903348 | MVR | M36C05 | OK     | 23.5647 | 39.9022 | 0.759843  | -1.08928  | 0.27603  | 0.961224  |
| gene873 | gene873 | SACOL0885 | gi 57650036 ref NC_002951.2 :903490-904711 | MVR | M36C05 | OK     | 2.58097 | 1.40374 | -0.878634 | 1.15809   | 0.24683  | 0.921724  |
| gene874 | gene874 | sek       | gi 57650036 ref NC_002951.2 :904799-905528 | MVR | M36C05 | OK     | 18.061  | 6.46572 | -1.482    | 2.13611   | 0.03267  | 0.346679  |

|         |         |           |                                            |     |        |        |         |         |             |             |          |           |
|---------|---------|-----------|--------------------------------------------|-----|--------|--------|---------|---------|-------------|-------------|----------|-----------|
| gene875 | gene875 | sei       | gi 57650036 ref NC_002951.2 :905551-906280 | MVR | M36C05 | OK     | 10.4198 | 7.09143 | -0.555182   | 0.79874     | 0.42444  | 0.999883  |
| gene876 | gene876 | SACOL0888 | gi 57650036 ref NC_002951.2 :906349-906781 | MVR | M36C05 | OK     | 15.0476 | 13.7799 | -0.126967   | 0.178399    | 0.85841  | 0.999883  |
| gene877 | gene877 | SACOL0889 | gi 57650036 ref NC_002951.2 :906797-907256 | MVR | M36C05 | OK     | 8.41744 | 12.7833 | 0.602807    | -0.825668   | 0.40899  | 0.999883  |
| gene878 | gene878 | SACOL0890 | gi 57650036 ref NC_002951.2 :907267-907600 | MVR | M36C05 | OK     | 15.169  | 36.138  | 1.25239     | -1.72522    | 0.08449  | 0.57847   |
| gene879 | gene879 | SACOL0891 | gi 57650036 ref NC_002951.2 :907792-908321 | MVR | M36C05 | OK     | 6.13255 | 12.644  | 1.0439      | -1.02904    | 0.30346  | 0.988364  |
| gene88  | gene88  | SACOL0091 | gi 57650036 ref NC_002951.2 :103120-104518 | MVR | M36C05 | NOTEST | 0       | 0       | 0           | 0           | 1        | 1         |
| gene880 | gene880 | SACOL0892 | gi 57650036 ref NC_002951.2 :907792-908321 | MVR | M36C05 | OK     | 0.79917 | 2.57159 | 1.68608     | -0.58612    | 0.5578   | 0.999883  |
| gene881 | gene881 | SACOL0893 | gi 57650036 ref NC_002951.2 :908332-908681 | MVR | M36C05 | OK     | 0       | 21.2822 | 1.79769e+30 | 1.79769e+30 | 0.2187   | 0.89416   |
| gene882 | gene882 | SACOL0894 | gi 57650036 ref NC_002951.2 :908332-908681 | MVR | M36C05 | NOTEST | 0       | 0       | 0           | 0           | 1        | 1         |
| gene883 | gene883 | SACOL0895 | gi 57650036 ref NC_002951.2 :908683-909004 | MVR | M36C05 | NOTEST | 0       | 0.87161 | 1.79769e+30 | 1.79769e+30 | 0.14732  | 1         |
| gene884 | gene884 | SACOL0896 | gi 57650036 ref NC_002951.2 :909067-909937 | MVR | M36C05 | NOTEST | 0       | 0       | 0           | 0           | 1        | 1         |
| gene885 | gene885 | SACOL0897 | gi 57650036 ref NC_002951.2 :909953-911411 | MVR | M36C05 | NOTEST | 0       | 0       | 0           | 0           | 1        | 1         |
| gene886 | gene886 | SACOL0898 | gi 57650036 ref NC_002951.2 :911711-912074 | MVR | M36C05 | NOTEST | 0       | 0       | 0           | 0           | 1        | 1         |
| gene887 | gene887 | SACOL0899 | gi 57650036 ref NC_002951.2 :912075-912998 | MVR | M36C05 | NOTEST | 0       | 0       | 0           | 0           | 1        | 1         |
| gene888 | gene888 | SACOL0900 | gi 57650036 ref NC_002951.2 :912075-912998 | MVR | M36C05 | OK     | 2.09778 | 3.99528 | 0.929432    | -1.1289     | 0.25894  | 0.938582  |
| gene889 | gene889 | SACOL0901 | gi 57650036 ref NC_002951.2 :913514-913856 | MVR | M36C05 | OK     | 28.9932 | 18.9386 | -0.614389   | 0.862473    | 0.38843  | 0.999883  |
| gene89  | gene89  | SACOL0092 | gi 57650036 ref NC_002951.2 :104707-105181 | MVR | M36C05 | OK     | 6.05831 | 53.1833 | 3.13399     | -4.26126    | 2.03E-05 | 0.0014283 |
| gene890 | gene890 | SACOL0902 | gi 57650036 ref NC_002951.2 :913867-914446 | MVR | M36C05 | OK     | 31.6062 | 29.7122 | -0.0891531  | 0.130801    | 0.89593  | 0.999883  |
| gene891 | gene891 | SACOL0903 | gi 57650036 ref NC_002951.2 :914463-914682 | MVR | M36C05 | OK     | 213.183 | 137.575 | -0.631881   | 0.926108    | 0.35439  | 0.999883  |
| gene892 | gene892 | SACOL0904 | gi 57650036 ref NC_002951.2 :914732-915260 | MVR | M36C05 | OK     | 11.7166 | 5.72302 | -1.03371    | 1.41376     | 0.15743  | 0.77612   |
| gene893 | gene893 | SACOL0905 | gi 57650036 ref NC_002951.2 :915262-916170 | MVR | M36C05 | OK     | 11.5052 | 7.57543 | -0.602893   | 0.440479    | 0.65959  | 0.999883  |
| gene894 | gene894 | SACOL0906 | gi 57650036 ref NC_002951.2 :915262-916170 | MVR | M36C05 | OK     | 14.355  | 7.16144 | -1.00323    | 1.24166     | 0.21436  | 0.89416   |
| gene895 | gene895 | seb       | gi 57650036 ref NC_002951.2 :916477-917278 | MVR | M36C05 | NOTEST | 0       | 0       | 0           | 0           | 1        | 1         |
| gene896 | gene896 | SACOL0908 | gi 57650036 ref NC_002951.2 :917355-917913 | MVR | M36C05 | NOTEST | 0       | 0       | 0           | 0           | 1        | 1         |
| gene897 | gene897 | SACOL0909 | gi 57650036 ref NC_002951.2 :918285-918438 | MVR | M36C05 | OK     | 167.732 | 204.749 | 0.2877      | -0.353817   | 0.72348  | 0.999883  |
| gene898 | gene898 | SACOL0910 | gi 57650036 ref NC_002951.2 :918508-918806 | MVR | M36C05 | NOTEST | 0       | 0       | 0           | 0           | 1        | 1         |
| gene899 | gene899 | SACOL0911 | gi 57650036 ref NC_002951.2 :918508-918806 | MVR | M36C05 | OK     | 88.0822 | 83.8398 | -0.0712147  | 0.096569    | 0.92307  | 0.999883  |
| gene9   | gene9   | SACOL0010 | gi 57650036 ref NC_002951.2 :14748-15770   | MVR | M36C05 | OK     | 9.16604 | 8.89889 | -0.042673   | 0.054137    | 0.95683  | 0.999883  |
| gene90  | gene90  | SACOL0093 | gi 57650036 ref NC_002951.2 :105442-107035 | MVR | M36C05 | OK     | 30.1192 | 31.6506 | 0.0715465   | -0.095479   | 0.92393  | 0.999883  |
| gene900 | gene900 | SACOL0912 | gi 57650036 ref NC_002951.2 :919636-919831 | MVR | M36C05 | OK     | 2853.72 | 58362.5 | 4.35413     | -4.94854    | 7.48E-07 | 9.49E-05  |
| gene901 | gene901 | SACOL0913 | gi 57650036 ref NC_002951.2 :920063-920915 | MVR | M36C05 | OK     | 52.8864 | 121.635 | 1.20159     | -1.56756    | 0.11698  | 0.676208  |
| gene902 | gene902 | SACOL0914 | gi 57650036 ref NC_002951.2 :921242-922004 | MVR | M36C05 | OK     | 180.188 | 353.546 | 0.972397    | -1.1354     | 0.25621  | 0.933885  |
| gene903 | gene903 | sufD      | gi 57650036 ref NC_002951.2 :922101-923409 | MVR | M36C05 | OK     | 173.563 | 252.32  | 0.539793    | -0.597612   | 0.5501   | 0.999883  |

|         |         |           |                                            |     |        |        |         |         |              |              |          |           |
|---------|---------|-----------|--------------------------------------------|-----|--------|--------|---------|---------|--------------|--------------|----------|-----------|
| gene904 | gene904 | SACOL0916 | gi 57650036 ref NC_002951.2 :923523-925219 | MVR | M36C05 | OK     | 164.878 | 207.478 | 0.331563     | -0.335519    | 0.73723  | 0.999883  |
| gene905 | gene905 | SACOL0917 | gi 57650036 ref NC_002951.2 :923523-925219 | MVR | M36C05 | OK     | 139.128 | 159.944 | 0.201153     | -0.090615    | 0.9278   | 0.999883  |
| gene906 | gene906 | sufB      | gi 57650036 ref NC_002951.2 :925369-926767 | MVR | M36C05 | OK     | 200.861 | 215.775 | 0.103332     | -0.113577    | 0.90957  | 0.999883  |
| gene907 | gene907 | SACOL0919 | gi 57650036 ref NC_002951.2 :926953-927091 | MVR | M36C05 | NOTEST | 0       | 0       | 0            | 0            | 1        | 1         |
| gene908 | gene908 | SACOL0920 | gi 57650036 ref NC_002951.2 :927096-927411 | MVR | M36C05 | OK     | 2.78684 | 0       | -1.79769e+30 | -1.79769e+30 | 0.04385  | 0.40838   |
| gene909 | gene909 | SACOL0921 | gi 57650036 ref NC_002951.2 :927775-928816 | MVR | M36C05 | OK     | 13.1703 | 62.1485 | 2.23843      | -3.09153     | 0.00199  | 0.0576438 |
| gene91  | gene91  | spa       | gi 57650036 ref NC_002951.2 :107363-108890 | MVR | M36C05 | OK     | 106.424 | 9.22015 | -3.52889     | 4.55517      | 5.23E-06 | 0.0004795 |
| gene910 | gene910 | SACOL0922 | gi 57650036 ref NC_002951.2 :928829-929897 | MVR | M36C05 | OK     | 9.28466 | 34.1717 | 1.87988      | -2.68097     | 0.00734  | 0.137988  |
| gene911 | gene911 | SACOL0924 | gi 57650036 ref NC_002951.2 :930109-930958 | MVR | M36C05 | OK     | 40.3229 | 32.8014 | -0.297841    | 0.42233      | 0.67278  | 0.999883  |
| gene912 | gene912 | SACOL0925 | gi 57650036 ref NC_002951.2 :930970-931798 | MVR | M36C05 | OK     | 25.5573 | 17.9159 | -0.512491    | 0.748253     | 0.45431  | 0.999883  |
| gene913 | gene913 | SACOL0926 | gi 57650036 ref NC_002951.2 :931824-933144 | MVR | M36C05 | OK     | 38.4201 | 26.2803 | -0.547876    | 0.745653     | 0.45588  | 0.999883  |
| gene914 | gene914 | lipA      | gi 57650036 ref NC_002951.2 :933227-934145 | MVR | M36C05 | OK     | 268.448 | 192.465 | -0.480047    | 0.551478     | 0.58131  | 0.999883  |
| gene915 | gene915 | SACOL0928 | gi 57650036 ref NC_002951.2 :934265-934658 | MVR | M36C05 | OK     | 172.988 | 78.4671 | -1.14051     | 1.6175       | 0.10577  | 0.653986  |
| gene916 | gene916 | SACOL0929 | gi 57650036 ref NC_002951.2 :934736-934994 | MVR | M36C05 | OK     | 160.813 | 95.7499 | -0.748038    | 1.09847      | 0.272    | 0.956031  |
| gene917 | gene917 | SACOL0930 | gi 57650036 ref NC_002951.2 :935100-936314 | MVR | M36C05 | OK     | 101.145 | 60.5249 | -0.74082     | 0.585834     | 0.55799  | 0.999883  |
| gene918 | gene918 | SACOL0931 | gi 57650036 ref NC_002951.2 :935100-936314 | MVR | M36C05 | OK     | 65.4103 | 45.649  | -0.518934    | 0.54609      | 0.585    | 0.999883  |
| gene919 | gene919 | SACOL0932 | gi 57650036 ref NC_002951.2 :936346-937306 | MVR | M36C05 | OK     | 77.6247 | 44.9825 | -0.787151    | 1.04637      | 0.29539  | 0.978474  |
| gene92  | gene92  | sarS      | gi 57650036 ref NC_002951.2 :109310-110063 | MVR | M36C05 | OK     | 109.863 | 47.8813 | -1.19817     | 1.61055      | 0.10728  | 0.653986  |
| gene920 | gene920 | SACOL0933 | gi 57650036 ref NC_002951.2 :937559-937670 | MVR | M36C05 | NOTEST | 0       | 0       | 0            | 0            | 1        | 1         |
| gene921 | gene921 | SACOL0934 | gi 57650036 ref NC_002951.2 :937717-937870 | MVR | M36C05 | OK     | 260.916 | 204.749 | -0.34973     | 0.44799      | 0.65416  | 0.999883  |
| gene922 | gene922 | dltA      | gi 57650036 ref NC_002951.2 :937885-940554 | MVR | M36C05 | OK     | 528.408 | 477.899 | -0.144947    | 0.119036     | 0.90525  | 0.999883  |
| gene923 | gene923 | dltB      | gi 57650036 ref NC_002951.2 :937885-940554 | MVR | M36C05 | OK     | 447.263 | 246.457 | -0.859789    | 0.512378     | 0.60839  | 0.999883  |
| gene924 | gene924 | dltC      | gi 57650036 ref NC_002951.2 :940571-941980 | MVR | M36C05 | OK     | 502.746 | 282.415 | -0.832012    | 0.178338     | 0.85846  | 0.999883  |
| gene925 | gene925 | dltD      | gi 57650036 ref NC_002951.2 :940571-941980 | MVR | M36C05 | OK     | 678.744 | 312.682 | -1.11817     | 1.14545      | 0.25202  | 0.92853   |
| gene926 | gene926 | SACOL0939 | gi 57650036 ref NC_002951.2 :942242-942464 | MVR | M36C05 | OK     | 142.933 | 73.9046 | -0.951605    | 1.36546      | 0.17211  | 0.817827  |
| gene927 | gene927 | SACOL0940 | gi 57650036 ref NC_002951.2 :942585-942909 | MVR | M36C05 | OK     | 163.756 | 67.4316 | -1.28005     | 1.86348      | 0.06239  | 0.504373  |
| gene928 | gene928 | SACOL0941 | gi 57650036 ref NC_002951.2 :942969-944032 | MVR | M36C05 | OK     | 67.5406 | 79.728  | 0.239332     | -0.306949    | 0.75888  | 0.999883  |
| gene929 | gene929 | SACOL0942 | gi 57650036 ref NC_002951.2 :944348-944585 | MVR | M36C05 | OK     | 334.761 | 528.328 | 0.658301     | -0.931762    | 0.35146  | 0.999883  |
| gene93  | gene93  | sirC      | gi 57650036 ref NC_002951.2 :110431-112422 | MVR | M36C05 | OK     | 8.30008 | 107.927 | 3.70079      | -4.84367     | 1.27E-06 | 0.0001377 |
| gene930 | gene930 | SACOL0943 | gi 57650036 ref NC_002951.2 :944597-944957 | MVR | M36C05 | OK     | 195.062 | 364.691 | 0.902737     | -1.20942     | 0.2265   | 0.897207  |
| gene931 | gene931 | SACOL0944 | gi 57650036 ref NC_002951.2 :945410-946619 | MVR | M36C05 | OK     | 110.671 | 77.7971 | -0.508489    | 0.62245      | 0.53365  | 0.999883  |
| gene932 | gene932 | SACOL0945 | gi 57650036 ref NC_002951.2 :946749-948225 | MVR | M36C05 | OK     | 36.0164 | 91.2242 | 1.34076      | -1.68074     | 0.09281  | 0.611738  |
| gene933 | gene933 | SACOL0946 | gi 57650036 ref NC_002951.2 :948635-949952 | MVR | M36C05 | OK     | 15.2497 | 11.251  | -0.438728    | 0.638672     | 0.52304  | 0.999883  |

|         |         |           |                                            |     |        |        |         |         |            |           |         |          |
|---------|---------|-----------|--------------------------------------------|-----|--------|--------|---------|---------|------------|-----------|---------|----------|
| gene934 | gene934 | SACOL0947 | gi 57650036 ref NC_002951.2 :949970-950345 | MVR | M36C05 | OK     | 51.3003 | 61.1852 | 0.254217   | -0.37347  | 0.7088  | 0.999883 |
| gene935 | gene935 | SACOL0948 | gi 57650036 ref NC_002951.2 :950400-951555 | MVR | M36C05 | OK     | 1.69602 | 1.50084 | -0.17638   | 0.225296  | 0.82175 | 0.999883 |
| gene936 | gene936 | mnhG      | gi 57650036 ref NC_002951.2 :951803-952910 | MVR | M36C05 | OK     | 79.3346 | 45.6162 | -0.798403  | 0.701593  | 0.48293 | 0.999883 |
| gene937 | gene937 | mnhF      | gi 57650036 ref NC_002951.2 :951803-952910 | MVR | M36C05 | OK     | 15.1705 | 7.48446 | -1.0193    | 0.300627  | 0.7637  | 0.999883 |
| gene938 | gene938 | mnhE      | gi 57650036 ref NC_002951.2 :951803-952910 | MVR | M36C05 | OK     | 58.2771 | 42.1905 | -0.466011  | 0.497309  | 0.61897 | 0.999883 |
| gene939 | gene939 | mnhD      | gi 57650036 ref NC_002951.2 :952911-957568 | MVR | M36C05 | OK     | 65.8369 | 56.0064 | -0.233304  | 0.127976  | 0.89817 | 0.999883 |
| gene94  | gene94  | sirB      | gi 57650036 ref NC_002951.2 :110431-112422 | MVR | M36C05 | OK     | 0.60599 | 1.66242 | 1.45593    | -0.289945 | 0.77186 | 0.999883 |
| gene940 | gene940 | mnhC      | gi 57650036 ref NC_002951.2 :952911-957568 | MVR | M36C05 | OK     | 49.2425 | 62.876  | 0.352607   | -0.060746 | 0.95156 | 0.999883 |
| gene941 | gene941 | mnhB      | gi 57650036 ref NC_002951.2 :952911-957568 | MVR | M36C05 | OK     | 56.5134 | 54.387  | -0.0553314 | 0.012026  | 0.99041 | 0.999883 |
| gene942 | gene942 | mnhA      | gi 57650036 ref NC_002951.2 :952911-957568 | MVR | M36C05 | OK     | 75.808  | 106.551 | 0.491127   | -0.432118 | 0.66566 | 0.999883 |
| gene943 | gene943 | kapB      | gi 57650036 ref NC_002951.2 :957698-958082 | MVR | M36C05 | OK     | 39.4825 | 50.5964 | 0.357822   | -0.525086 | 0.59952 | 0.999883 |
| gene944 | gene944 | SACOL0957 | gi 57650036 ref NC_002951.2 :958145-958739 | MVR | M36C05 | OK     | 125.421 | 63.3224 | -0.985996  | 1.34519   | 0.17856 | 0.821737 |
| gene945 | gene945 | SACOL0958 | gi 57650036 ref NC_002951.2 :959154-959532 | MVR | M36C05 | OK     | 217.864 | 486.568 | 1.15921    | -1.49966  | 0.1337  | 0.7248   |
| gene946 | gene946 | SACOL0959 | gi 57650036 ref NC_002951.2 :959893-961021 | MVR | M36C05 | OK     | 62.1035 | 176.673 | 1.50833    | -1.83257  | 0.06687 | 0.516447 |
| gene947 | gene947 | rocD      | gi 57650036 ref NC_002951.2 :961328-962519 | MVR | M36C05 | OK     | 388.388 | 786.996 | 1.01886    | -1.0582   | 0.28997 | 0.975616 |
| gene948 | gene948 | gluD      | gi 57650036 ref NC_002951.2 :962627-963872 | MVR | M36C05 | OK     | 695.207 | 1143.6  | 0.718071   | -0.735184 | 0.46223 | 0.999883 |
| gene949 | gene949 | SACOL0962 | gi 57650036 ref NC_002951.2 :964374-965304 | MVR | M36C05 | OK     | 31.0601 | 40.6392 | 0.387811   | -0.544904 | 0.58582 | 0.999883 |
| gene95  | gene95  | sirA      | gi 57650036 ref NC_002951.2 :112437-113430 | MVR | M36C05 | OK     | 6.0835  | 4.03274 | -0.593142  | 0.845236  | 0.39798 | 0.999883 |
| gene950 | gene950 | argH      | gi 57650036 ref NC_002951.2 :965545-968120 | MVR | M36C05 | OK     | 78.5698 | 24.8497 | -1.66075   | 1.68086   | 0.09279 | 0.611738 |
| gene951 | gene951 | argG      | gi 57650036 ref NC_002951.2 :965545-968120 | MVR | M36C05 | OK     | 50.5019 | 13.151  | -1.94117   | 1.39198   | 0.16393 | 0.793541 |
| gene952 | gene952 | SACOL0965 | gi 57650036 ref NC_002951.2 :968264-968399 | MVR | M36C05 | NOTEST | 0       | 0       | 0          | 0         | 1       | 1        |
| gene953 | gene953 | pgi       | gi 57650036 ref NC_002951.2 :968470-969802 | MVR | M36C05 | OK     | 101.608 | 294.489 | 1.5352     | -1.72928  | 0.08376 | 0.575114 |
| gene954 | gene954 | SACOL0967 | gi 57650036 ref NC_002951.2 :970126-970702 | MVR | M36C05 | OK     | 39.8433 | 30.5369 | -0.383784  | 0.561251  | 0.57463 | 0.999883 |
| gene955 | gene955 | spsA      | gi 57650036 ref NC_002951.2 :970706-971231 | MVR | M36C05 | OK     | 56.2528 | 37.7131 | -0.576861  | 0.839707  | 0.40107 | 0.999883 |
| gene956 | gene956 | spsB      | gi 57650036 ref NC_002951.2 :971237-971822 | MVR | M36C05 | OK     | 86.2865 | 51.6148 | -0.74135   | 1.04245   | 0.2972  | 0.9791   |
| gene957 | gene957 | rexB      | gi 57650036 ref NC_002951.2 :971981-975458 | MVR | M36C05 | OK     | 35.0099 | 38.8014 | 0.148349   | -0.176009 | 0.86029 | 0.999883 |
| gene958 | gene958 | rexA      | gi 57650036 ref NC_002951.2 :975458-979112 | MVR | M36C05 | OK     | 31.2422 | 32.6975 | 0.0656823  | -0.078764 | 0.93722 | 0.999883 |
| gene959 | gene959 | SACOL0973 | gi 57650036 ref NC_002951.2 :979277-980180 | MVR | M36C05 | OK     | 258.185 | 345.46  | 0.420112   | -0.470098 | 0.63829 | 0.999883 |
| gene96  | gene96  | SACOL0100 | gi 57650036 ref NC_002951.2 :113693-114641 | MVR | M36C05 | OK     | 0.72692 | 1.32692 | 0.86822    | -0.944834 | 0.34474 | 0.999883 |
| gene960 | gene960 | SACOL0974 | gi 57650036 ref NC_002951.2 :980508-980898 | MVR | M36C05 | OK     | 40.6022 | 60.6095 | 0.577985   | -0.847603 | 0.39666 | 0.999883 |
| gene961 | gene961 | SACOL0975 | gi 57650036 ref NC_002951.2 :981068-982385 | MVR | M36C05 | OK     | 76.9975 | 156.823 | 1.02625    | -1.21629  | 0.22388 | 0.89446  |
| gene962 | gene962 | SACOL0976 | gi 57650036 ref NC_002951.2 :982436-983261 | MVR | M36C05 | OK     | 73.4546 | 142.075 | 0.951728   | -1.21576  | 0.22408 | 0.89446  |
| gene963 | gene963 | SACOL0977 | gi 57650036 ref NC_002951.2 :983374-983683 | MVR | M36C05 | OK     | 294.175 | 286.216 | -0.0395743 | 0.054552  | 0.9565  | 0.999883 |

|         |         |           |                                              |     |        |        |         |         |           |           |         |           |
|---------|---------|-----------|----------------------------------------------|-----|--------|--------|---------|---------|-----------|-----------|---------|-----------|
| gene964 | gene964 | SACOL0978 | gi 57650036 ref NC_002951.2 :984229-986044   | MVR | M36C05 | OK     | 2.86744 | 2.25204 | -0.348529 | 0.499058  | 0.61774 | 0.999883  |
| gene965 | gene965 | clpB      | gi 57650036 ref NC_002951.2 :986246-988856   | MVR | M36C05 | OK     | 262.747 | 112.206 | -1.22752  | 1.29685   | 0.19468 | 0.856906  |
| gene966 | gene966 | SACOL0980 | gi 57650036 ref NC_002951.2 :988914-989784   | MVR | M36C05 | NOTEST | 0.5431  | 0.65849 | 0.277938  | -0.259455 | 0.79528 | 1         |
| gene967 | gene967 | SACOL0981 | gi 57650036 ref NC_002951.2 :989893-993274   | MVR | M36C05 | NOTEST | 0.31714 | 0.69929 | 1.14076   | -0.495721 | 0.62009 | 1         |
| gene968 | gene968 | SACOL0982 | gi 57650036 ref NC_002951.2 :989893-993274   | MVR | M36C05 | OK     | 1.11882 | 1.99764 | 0.836323  | -0.446702 | 0.65509 | 0.999883  |
| gene969 | gene969 | SACOL0983 | gi 57650036 ref NC_002951.2 :989893-993274   | MVR | M36C05 | OK     | 1.96024 | 2.0396  | 0.0572502 | -0.05181  | 0.95868 | 0.999883  |
| gene97  | gene97  | SACOL0101 | gi 57650036 ref NC_002951.2 :114649-115648   | MVR | M36C05 | OK     | 1.13183 | 0.82809 | -0.450801 | 0.500736  | 0.61656 | 0.999883  |
| gene970 | gene970 | SACOL0984 | gi 57650036 ref NC_002951.2 :989893-993274   | MVR | M36C05 | OK     | 5.19747 | 5.591   | 0.105296  | -0.090535 | 0.92786 | 0.999883  |
| gene971 | gene971 | SACOL0985 | gi 57650036 ref NC_002951.2 :993584-994019   | MVR | M36C05 | OK     | 87.952  | 41.2883 | -1.09098  | 1.58713   | 0.11248 | 0.665508  |
| gene972 | gene972 | SACOL0986 | gi 57650036 ref NC_002951.2 :994275-994461   | MVR | M36C05 | OK     | 3030.97 | 2020.63 | -0.584977 | 0.767028  | 0.44307 | 0.999883  |
| gene973 | gene973 | fabH      | gi 57650036 ref NC_002951.2 :994755-995697   | MVR | M36C05 | OK     | 82.0133 | 13.5252 | -2.6002   | 3.56697   | 0.00036 | 0.015577  |
| gene974 | gene974 | fabF      | gi 57650036 ref NC_002951.2 :995708-996953   | MVR | M36C05 | OK     | 172.298 | 111.301 | -0.630444 | 0.733496  | 0.46326 | 0.999883  |
| gene975 | gene975 | SACOL0989 | gi 57650036 ref NC_002951.2 :997007-997379   | MVR | M36C05 | OK     | 25.5334 | 11.4234 | -1.1604   | 1.59906   | 0.10981 | 0.659073  |
| gene976 | gene976 | SACOL0990 | gi 57650036 ref NC_002951.2 :997601-999618   | MVR | M36C05 | NOTEST | 0       | 0       | 0         | 0         | 1       | 1         |
| gene977 | gene977 | oppB      | gi 57650036 ref NC_002951.2 :997601-999618   | MVR | M36C05 | OK     | 373.104 | 111.321 | -1.74485  | 1.29055   | 0.19686 | 0.860309  |
| gene978 | gene978 | oppC      | gi 57650036 ref NC_002951.2 :997601-999618   | MVR | M36C05 | OK     | 286.046 | 108.745 | -1.3953   | 1.10904   | 0.26741 | 0.950995  |
| gene979 | gene979 | oppD      | gi 57650036 ref NC_002951.2 :999634-1001648  | MVR | M36C05 | OK     | 451.023 | 195.675 | -1.20474  | 1.05063   | 0.29343 | 0.976946  |
| gene98  | gene98  | SACOL0102 | gi 57650036 ref NC_002951.2 :115668-124110   | MVR | M36C05 | OK     | 0.61124 | 1.27581 | 1.0616    | -0.459635 | 0.64578 | 0.999883  |
| gene980 | gene980 | oppF      | gi 57650036 ref NC_002951.2 :999634-1001648  | MVR | M36C05 | OK     | 272.835 | 105.675 | -1.36839  | 0.827135  | 0.40816 | 0.999883  |
| gene981 | gene981 | SACOL0995 | gi 57650036 ref NC_002951.2 :1001665-1003321 | MVR | M36C05 | OK     | 452.746 | 164.119 | -1.46396  | 1.55457   | 0.12005 | 0.688173  |
| gene982 | gene982 | SACOL0996 | gi 57650036 ref NC_002951.2 :1003532-1005248 | MVR | M36C05 | OK     | 1.45043 | 1.23595 | -0.230866 | 0.308064  | 0.75803 | 0.999883  |
| gene983 | gene983 | SACOL0997 | gi 57650036 ref NC_002951.2 :1005298-1006285 | MVR | M36C05 | OK     | 1.14962 | 1.40121 | 0.285515  | -0.336109 | 0.73679 | 0.999883  |
| gene984 | gene984 | SACOL0998 | gi 57650036 ref NC_002951.2 :1006287-1008223 | MVR | M36C05 | OK     | 1.08148 | 0.98839 | -0.129855 | 0.07989   | 0.93633 | 0.999883  |
| gene985 | gene985 | SACOL0999 | gi 57650036 ref NC_002951.2 :1006287-1008223 | MVR | M36C05 | OK     | 3.63996 | 5.49228 | 0.593482  | -0.760655 | 0.44686 | 0.999883  |
| gene986 | gene986 | SACOL1000 | gi 57650036 ref NC_002951.2 :1008234-1009116 | MVR | M36C05 | OK     | 5.68746 | 6.14542 | 0.111727  | -0.159748 | 0.87308 | 0.999883  |
| gene987 | gene987 | trpS      | gi 57650036 ref NC_002951.2 :1009157-1010147 | MVR | M36C05 | OK     | 79.8532 | 62.3961 | -0.355894 | 0.462817  | 0.6435  | 0.999883  |
| gene988 | gene988 | spxA      | gi 57650036 ref NC_002951.2 :1010441-1010837 | MVR | M36C05 | OK     | 10827.3 | 28626.7 | 1.40269   | -1.53721  | 0.12424 | 0.698629  |
| gene989 | gene989 | SACOL1003 | gi 57650036 ref NC_002951.2 :1011207-1011927 | MVR | M36C05 | OK     | 28.8795 | 179.086 | 2.63254   | -3.48904  | 0.00048 | 0.0197088 |
| gene99  | gene99  | SACOL0103 | gi 57650036 ref NC_002951.2 :115668-124110   | MVR | M36C05 | OK     | 1.86829 | 1.1473  | -0.703478 | 0.326595  | 0.74397 | 0.999883  |
| gene990 | gene990 | SACOL1004 | gi 57650036 ref NC_002951.2 :1012047-1013034 | MVR | M36C05 | OK     | 0.9197  | 1.12097 | 0.285515  | -0.31977  | 0.74914 | 0.999883  |
| gene991 | gene991 | pepF      | gi 57650036 ref NC_002951.2 :1013081-1014890 | MVR | M36C05 | OK     | 36.2739 | 69.9369 | 0.947122  | -1.17669  | 0.23932 | 0.9107    |
| gene992 | gene992 | SACOL1006 | gi 57650036 ref NC_002951.2 :1015349-1016156 | MVR | M36C05 | OK     | 80.1344 | 157.562 | 0.975422  | -1.23677  | 0.21617 | 0.89416   |
| gene993 | gene993 | SACOL1007 | gi 57650036 ref NC_002951.2 :1016178-1016544 | MVR | M36C05 | OK     | 100.725 | 213.26  | 1.08219   | -1.52007  | 0.12849 | 0.710394  |

|          |          |           |                                              |       |        |        |         |         |             |             |         |           |
|----------|----------|-----------|----------------------------------------------|-------|--------|--------|---------|---------|-------------|-------------|---------|-----------|
| gene994  | gene994  | SACOL1008 | gi 57650036 ref NC_002951.2 :1016647-1017241 | MVR   | M36C05 | OK     | 15.7961 | 24.0961 | 0.609229    | -0.89251    | 0.37212 | 0.999883  |
| gene995  | gene995  | SACOL1009 | gi 57650036 ref NC_002951.2 :1017426-1017774 | MVR   | M36C05 | OK     | 43.7902 | 43.7798 | -0.00034    | 0.000497    | 0.9996  | 0.999883  |
| gene996  | gene996  | relA1     | gi 57650036 ref NC_002951.2 :1017790-1018426 | MVR   | M36C05 | OK     | 33.4852 | 46.8324 | 0.483985    | -0.699634   | 0.48416 | 0.999883  |
| gene997  | gene997  | ppnK      | gi 57650036 ref NC_002951.2 :1018442-1020103 | MVR   | M36C05 | OK     | 58.3714 | 90.4184 | 0.631355    | -0.708819   | 0.47844 | 0.999883  |
| gene998  | gene998  | SACOL1012 | gi 57650036 ref NC_002951.2 :1018442-1020103 | MVR   | M36C05 | OK     | 17.3288 | 27.617  | 0.672387    | -0.42969    | 0.66742 | 0.999883  |
| gene999  | gene999  | mgtE      | gi 57650036 ref NC_002951.2 :1020123-1021509 | MVR   | M36C05 | OK     | 21.9947 | 27.2334 | 0.308223    | -0.428396   | 0.66836 | 0.999883  |
|          | -        | -         | gi 57650036 ref NC_002951.2 :2227979-2228055 | MR150 | M36C05 | OK     | 0       | 293622  | 1.79769e+30 | 1.79769e+30 | 0.14732 | 0.743774  |
| gene0    | gene0    | dnaA      | gi 57650036 ref NC_002951.2 :543-1905        | MR150 | M36C05 | OK     | 58.652  | 24.9503 | -1.23313    | 1.6348      | 0.10209 | 0.641904  |
| gene1    | gene1    | dnaN      | gi 57650036 ref NC_002951.2 :2182-3316       | MR150 | M36C05 | OK     | 101.985 | 79.21   | -0.364609   | 0.451642    | 0.65153 | 0.999883  |
| gene10   | gene10   | SACOL0011 | gi 57650036 ref NC_002951.2 :14748-15770     | MR150 | M36C05 | OK     | 14.7443 | 14.7477 | 0.00033068  | -0.00026    | 0.99979 | 0.999883  |
| gene100  | gene100  | SACOL0104 | gi 57650036 ref NC_002951.2 :115668-124110   | MR150 | M36C05 | OK     | 0.19931 | 1.07563 | 2.43213     | -0.931637   | 0.35152 | 0.999883  |
| gene1000 | gene1000 | SACOL1014 | gi 57650036 ref NC_002951.2 :1021518-1023363 | MR150 | M36C05 | OK     | 31.4718 | 24.4545 | -0.363961   | 0.482411    | 0.62951 | 0.999883  |
| gene1001 | gene1001 | fabI      | gi 57650036 ref NC_002951.2 :1023640-1024411 | MR150 | M36C05 | OK     | 173.481 | 105.877 | -0.712381   | 0.890074    | 0.37343 | 0.999883  |
| gene1002 | gene1002 | SACOL1017 | gi 57650036 ref NC_002951.2 :1024605-1025691 | MR150 | M36C05 | OK     | 77.0879 | 51.6464 | -0.577836   | 0.749199    | 0.45374 | 0.999883  |
| gene1003 | gene1003 | SACOL1018 | gi 57650036 ref NC_002951.2 :1026032-1027601 | MR150 | M36C05 | OK     | 36.3605 | 68.1152 | 0.905603    | -1.14682    | 0.25146 | 0.927778  |
| gene1004 | gene1004 | SACOL1019 | gi 57650036 ref NC_002951.2 :1027742-1028501 | MR150 | M36C05 | OK     | 15.6113 | 17.9598 | 0.202181    | -0.297228   | 0.76629 | 0.999883  |
| gene1005 | gene1005 | SACOL1020 | gi 57650036 ref NC_002951.2 :1028694-1029204 | MR150 | M36C05 | OK     | 599.099 | 760.132 | 0.343457    | -0.383787   | 0.70114 | 0.999883  |
| gene1006 | gene1006 | SACOL1021 | gi 57650036 ref NC_002951.2 :1029316-1031660 | MR150 | M36C05 | OK     | 57.9512 | 22.2504 | -1.38101    | 0.828524    | 0.40737 | 0.999883  |
| gene1007 | gene1007 | ypfP      | gi 57650036 ref NC_002951.2 :1029316-1031660 | MR150 | M36C05 | OK     | 106.072 | 89.128  | -0.251088   | 0.248073    | 0.80408 | 0.999883  |
| gene1008 | gene1008 | murE      | gi 57650036 ref NC_002951.2 :1032092-1035380 | MR150 | M36C05 | OK     | 35.8406 | 20.4637 | -0.808527   | 0.643068    | 0.52018 | 0.999883  |
| gene1009 | gene1009 | SACOL1024 | gi 57650036 ref NC_002951.2 :1032092-1035380 | MR150 | M36C05 | OK     | 42.368  | 28.7767 | -0.558075   | 0.11535     | 0.90817 | 0.999883  |
| gene101  | gene101  | SACOL0105 | gi 57650036 ref NC_002951.2 :115668-124110   | MR150 | M36C05 | OK     | 1.35804 | 3.07122 | 1.17729     | -1.00218    | 0.31626 | 0.999883  |
| gene1010 | gene1010 | prfC      | gi 57650036 ref NC_002951.2 :1032092-1035380 | MR150 | M36C05 | OK     | 55.8484 | 18.9234 | -1.56135    | 1.42248     | 0.15489 | 0.769852  |
| gene1011 | gene1011 | SACOL1026 | gi 57650036 ref NC_002951.2 :1035681-1036485 | MR150 | M36C05 | OK     | 23.5746 | 11.3234 | -1.05792    | 1.54662     | 0.12196 | 0.694408  |
| gene1012 | gene1012 | SACOL1027 | gi 57650036 ref NC_002951.2 :1036543-1036639 | MR150 | M36C05 | NOTEST | 0       | 0       | 0           | 0           | 1       | 1         |
| gene1013 | gene1013 | htrA      | gi 57650036 ref NC_002951.2 :1036718-1039028 | MR150 | M36C05 | OK     | 17.7133 | 6.89402 | -1.36142    | 1.90847     | 0.05633 | 0.472382  |
| gene1014 | gene1014 | SACOL1030 | gi 57650036 ref NC_002951.2 :1039044-1040403 | MR150 | M36C05 | OK     | 58.6716 | 33.9556 | -0.789014   | 1.03081     | 0.30263 | 0.987655  |
| gene1015 | gene1015 | SACOL1031 | gi 57650036 ref NC_002951.2 :1040541-1042053 | MR150 | M36C05 | OK     | 22.2969 | 30.4133 | 0.447859    | -0.611477   | 0.54088 | 0.999883  |
| gene1018 | gene1018 | SACOL1032 | gi 57650036 ref NC_002951.2 :1042539-1043070 | MR150 | M36C05 | OK     | 2.31133 | 3.33595 | 0.529374    | -0.612948   | 0.53991 | 0.999883  |
| gene1019 | gene1019 | SACOL1033 | gi 57650036 ref NC_002951.2 :1043318-1043537 | MR150 | M36C05 | OK     | 573.859 | 3799.56 | 2.72706     | -3.42381    | 0.00062 | 0.0238979 |
| gene102  | gene102  | SACOL0106 | gi 57650036 ref NC_002951.2 :115668-124110   | MR150 | M36C05 | OK     | 2.12276 | 4.97106 | 1.22762     | -0.797302   | 0.42528 | 0.999883  |
| gene1020 | gene1020 | SACOL1034 | gi 57650036 ref NC_002951.2 :1043617-1044604 | MR150 | M36C05 | OK     | 20.0412 | 44.9789 | 1.16628     | -1.6376     | 0.10151 | 0.63989   |
| gene1021 | gene1021 | SACOL1035 | gi 57650036 ref NC_002951.2 :1044802-1044979 | MR150 | M36C05 | OK     | 286.672 | 126.812 | -1.1767     | 1.64392     | 0.10019 | 0.638047  |



|          |          |           |                                              |       |        |        |         |         |             |             |         |           |
|----------|----------|-----------|----------------------------------------------|-------|--------|--------|---------|---------|-------------|-------------|---------|-----------|
| gene1022 | gene1022 | SACOL1036 | gi 57650036 ref NC_002951.2 :1044993-1045596 | MR150 | M36C05 | OK     | 386.258 | 250.636 | -0.623972   | 0.736893    | 0.46119 | 0.999883  |
| gene1023 | gene1023 | SACOL1037 | gi 57650036 ref NC_002951.2 :1045867-1045975 | MR150 | M36C05 | NOTEST | 0       | 0       | 0           | 0           | 1       | 1         |
| gene1024 | gene1024 | SACOL1038 | gi 57650036 ref NC_002951.2 :1046940-1048905 | MR150 | M36C05 | OK     | 0.60748 | 2.06056 | 1.76213     | -2.28506    | 0.02231 | 0.282751  |
| gene1025 | gene1025 | SACOL1039 | gi 57650036 ref NC_002951.2 :1048907-1049866 | MR150 | M36C05 | OK     | 0       | 7.84452 | 1.79769e+30 | 1.79769e+30 | 0.04502 | 0.415575  |
| gene1026 | gene1026 | SACOL1040 | gi 57650036 ref NC_002951.2 :1048907-1049866 | MR150 | M36C05 | OK     | 1.03896 | 3.99528 | 1.94316     | -1.93749    | 0.05269 | 0.453909  |
| gene1027 | gene1027 | SACOL1041 | gi 57650036 ref NC_002951.2 :1049953-1050244 | MR150 | M36C05 | OK     | 57.8526 | 37.2626 | -0.634655   | 0.914895    | 0.36025 | 0.999883  |
| gene1028 | gene1028 | SACOL1042 | gi 57650036 ref NC_002951.2 :1050522-1050810 | MR150 | M36C05 | OK     | 21.8659 | 5.61968 | -1.96012    | 2.26297     | 0.02364 | 0.292955  |
| gene1029 | gene1029 | SACOL1043 | gi 57650036 ref NC_002951.2 :1050815-1052297 | MR150 | M36C05 | OK     | 34.2875 | 7.39445 | -2.21317    | 3.08748     | 0.00202 | 0.057876  |
| gene103  | gene103  | SACOL0107 | gi 57650036 ref NC_002951.2 :115668-124110   | MR150 | M36C05 | OK     | 1.67957 | 2.30831 | 0.458747    | -0.299176   | 0.76481 | 0.999883  |
| gene1030 | gene1030 | SACOL1044 | gi 57650036 ref NC_002951.2 :1052385-1052742 | MR150 | M36C05 | OK     | 87.0651 | 22.117  | -1.97694    | 2.84223     | 0.00448 | 0.0988909 |
| gene1031 | gene1031 | SACOL1045 | gi 57650036 ref NC_002951.2 :1053218-1054178 | MR150 | M36C05 | OK     | 4.63413 | 2.75699 | -0.749204   | 1.03249     | 0.30184 | 0.987544  |
| gene1032 | gene1032 | SACOL1046 | gi 57650036 ref NC_002951.2 :1054223-1054355 | MR150 | M36C05 | OK     | 504.02  | 477.466 | -0.0780835  | 0.091436    | 0.92715 | 0.999883  |
| gene1033 | gene1033 | SACOL1047 | gi 57650036 ref NC_002951.2 :1054418-1054709 | MR150 | M36C05 | OK     | 70.0321 | 55.8939 | -0.325327   | 0.475762    | 0.63424 | 0.999883  |
| gene1034 | gene1034 | SACOL1048 | gi 57650036 ref NC_002951.2 :1054852-1055350 | MR150 | M36C05 | OK     | 30.2844 | 48.911  | 0.691586    | -1.0121     | 0.31149 | 0.993813  |
| gene1035 | gene1035 | menA      | gi 57650036 ref NC_002951.2 :1055401-1056340 | MR150 | M36C05 | OK     | 48.4864 | 42.9792 | -0.173942   | 0.237891    | 0.81197 | 0.999883  |
| gene1036 | gene1036 | SACOL1050 | gi 57650036 ref NC_002951.2 :1056490-1056595 | MR150 | M36C05 | NOTEST | 0       | 0       | 0           | 0           | 1       | 1         |
| gene1037 | gene1037 | SACOL1051 | gi 57650036 ref NC_002951.2 :1056671-1061147 | MR150 | M36C05 | OK     | 26.1802 | 12.2014 | -1.10143    | 0.363351    | 0.71634 | 0.999883  |
| gene1038 | gene1038 | menD      | gi 57650036 ref NC_002951.2 :1056671-1061147 | MR150 | M36C05 | OK     | 31.485  | 20.8624 | -0.593761   | 0.28417     | 0.77628 | 0.999883  |
| gene1039 | gene1039 | SACOL1053 | gi 57650036 ref NC_002951.2 :1056671-1061147 | MR150 | M36C05 | OK     | 38.5306 | 20.8205 | -0.888      | 0.285864    | 0.77498 | 0.999883  |
| gene104  | gene104  | SACOL0108 | gi 57650036 ref NC_002951.2 :124113-124878   | MR150 | M36C05 | OK     | 4.06465 | 4.49102 | 0.143913    | -0.196509   | 0.84421 | 0.999883  |
| gene1040 | gene1040 | menB      | gi 57650036 ref NC_002951.2 :1056671-1061147 | MR150 | M36C05 | OK     | 254.036 | 180.181 | -0.49559    | 0.444657    | 0.65657 | 0.999883  |
| gene1041 | gene1041 | sspC      | gi 57650036 ref NC_002951.2 :1061385-1061715 | MR150 | M36C05 | OK     | 4.53671 | 10.6511 | 1.23129     | -1.41209    | 0.15792 | 0.776469  |
| gene1042 | gene1042 | sspB1     | gi 57650036 ref NC_002951.2 :1061752-1062934 | MR150 | M36C05 | OK     | 4.36666 | 8.42043 | 0.947363    | -1.3772     | 0.16845 | 0.808072  |
| gene1043 | gene1043 | sspA      | gi 57650036 ref NC_002951.2 :1063015-1064026 | MR150 | M36C05 | OK     | 3.58757 | 3.6712  | 0.0332427   | -0.046374   | 0.96301 | 0.999883  |
| gene1044 | gene1044 | SACOL1058 | gi 57650036 ref NC_002951.2 :1064553-1065708 | MR150 | M36C05 | OK     | 41.0521 | 56.1085 | 0.450763    | -0.597171   | 0.55039 | 0.999883  |
| gene1045 | gene1045 | SACOL1059 | gi 57650036 ref NC_002951.2 :1065903-1066914 | MR150 | M36C05 | OK     | 7.93042 | 23.5229 | 1.56859     | -2.27625    | 0.02283 | 0.287725  |
| gene1046 | gene1046 | SACOL1060 | gi 57650036 ref NC_002951.2 :1067066-1067486 | MR150 | M36C05 | OK     | 35.3517 | 34.5439 | -0.0333458  | 0.048999    | 0.96092 | 0.999883  |
| gene1047 | gene1047 | atl       | gi 57650036 ref NC_002951.2 :1067692-1071463 | MR150 | M36C05 | OK     | 494.397 | 529.032 | 0.097686    | -0.10182    | 0.9189  | 0.999883  |
| gene1048 | gene1048 | SACOL1063 | gi 57650036 ref NC_002951.2 :1071690-1072125 | MR150 | M36C05 | OK     | 16.2416 | 14.5448 | -0.159199   | 0.2261      | 0.82112 | 0.999883  |
| gene1049 | gene1049 | SACOL1064 | gi 57650036 ref NC_002951.2 :1072279-1072750 | MR150 | M36C05 | OK     | 515.641 | 571.097 | 0.14737     | -0.170895   | 0.86431 | 0.999883  |
| gene105  | gene105  | SACOL0109 | gi 57650036 ref NC_002951.2 :125073-125481   | MR150 | M36C05 | NOTEST | 0       | 0       | 0           | 0           | 1       | 1         |
| gene1050 | gene1050 | SACOL1065 | gi 57650036 ref NC_002951.2 :1072797-1074015 | MR150 | M36C05 | OK     | 139.758 | 245.08  | 0.810321    | -0.915285   | 0.36004 | 0.999883  |
| gene1051 | gene1051 | SACOL1066 | gi 57650036 ref NC_002951.2 :1074465-1075659 | MR150 | M36C05 | OK     | 30.9681 | 8.09686 | -1.93535    | 2.75462     | 0.00588 | 0.119116  |

|          |          |           |                                              |       |        |        |         |         |             |             |         |           |
|----------|----------|-----------|----------------------------------------------|-------|--------|--------|---------|---------|-------------|-------------|---------|-----------|
| gene1052 | gene1052 | qoxD      | gi 57650036 ref NC_002951.2 :1076195-1076474 | MR150 | M36C05 | OK     | 1757.72 | 1488.64 | -0.239709   | 0.278097    | 0.78094 | 0.999883  |
| gene1053 | gene1053 | qoxC      | gi 57650036 ref NC_002951.2 :1076482-1080166 | MR150 | M36C05 | OK     | 434.301 | 553.298 | 0.34936     | -0.136084   | 0.89176 | 0.999883  |
| gene1054 | gene1054 | qoxA      | gi 57650036 ref NC_002951.2 :1076482-1080166 | MR150 | M36C05 | OK     | 370.129 | 555.537 | 0.585853    | -0.461012   | 0.64479 | 0.999883  |
| gene1055 | gene1055 | qoxB      | gi 57650036 ref NC_002951.2 :1076482-1080166 | MR150 | M36C05 | OK     | 354.04  | 505.655 | 0.51424     | -0.277449   | 0.78144 | 0.999883  |
| gene1056 | gene1056 | SACOL1071 | gi 57650036 ref NC_002951.2 :1080737-1081055 | MR150 | M36C05 | OK     | 146.726 | 220.8   | 0.589611    | -0.836776   | 0.40272 | 0.999883  |
| gene1057 | gene1057 | folD      | gi 57650036 ref NC_002951.2 :1081860-1082721 | MR150 | M36C05 | OK     | 171.416 | 327.558 | 0.934246    | -1.07637    | 0.28176 | 0.965951  |
| gene1058 | gene1058 | purE      | gi 57650036 ref NC_002951.2 :1082921-1084515 | MR150 | M36C05 | OK     | 64.3048 | 85.4401 | 0.409986    | -0.21041    | 0.83335 | 0.999883  |
| gene1059 | gene1059 | purK      | gi 57650036 ref NC_002951.2 :1082921-1084515 | MR150 | M36C05 | OK     | 87.2493 | 115.025 | 0.398737    | -0.428252   | 0.66847 | 0.999883  |
| gene106  | gene106  | SACOL0110 | gi 57650036 ref NC_002951.2 :125530-126157   | MR150 | M36C05 | OK     | 3.22627 | 2.84344 | -0.182232   | 0.226666    | 0.82068 | 0.999883  |
| gene1060 | gene1060 | purC      | gi 57650036 ref NC_002951.2 :1084518-1085486 | MR150 | M36C05 | OK     | 65.1767 | 62.4912 | -0.0607038  | 0.067555    | 0.94614 | 0.999883  |
| gene1061 | gene1061 | purS      | gi 57650036 ref NC_002951.2 :1084518-1085486 | MR150 | M36C05 | OK     | 142.889 | 199.494 | 0.48145     | -0.342234   | 0.73218 | 0.999883  |
| gene1062 | gene1062 | purQ      | gi 57650036 ref NC_002951.2 :1085487-1090825 | MR150 | M36C05 | OK     | 119.027 | 133.737 | 0.1681      | -0.059119   | 0.95286 | 0.999883  |
| gene1063 | gene1063 | purL      | gi 57650036 ref NC_002951.2 :1085487-1090825 | MR150 | M36C05 | OK     | 125.08  | 100.511 | -0.315492   | 0.216459    | 0.82863 | 0.999883  |
| gene1064 | gene1064 | purF      | gi 57650036 ref NC_002951.2 :1085487-1090825 | MR150 | M36C05 | OK     | 112.754 | 89.0408 | -0.340635   | 0.177531    | 0.85909 | 0.999883  |
| gene1065 | gene1065 | purM      | gi 57650036 ref NC_002951.2 :1085487-1090825 | MR150 | M36C05 | OK     | 139.65  | 95.6377 | -0.54616    | 0.245208    | 0.8063  | 0.999883  |
| gene1066 | gene1066 | purN      | gi 57650036 ref NC_002951.2 :1090827-1091394 | MR150 | M36C05 | OK     | 100.915 | 58.9639 | -0.775241   | 1.07671     | 0.28161 | 0.965951  |
| gene1067 | gene1067 | purH      | gi 57650036 ref NC_002951.2 :1091408-1092887 | MR150 | M36C05 | OK     | 83.5847 | 48.2629 | -0.792323   | 0.984034    | 0.3251  | 0.999883  |
| gene1068 | gene1068 | purD      | gi 57650036 ref NC_002951.2 :1092908-1094156 | MR150 | M36C05 | OK     | 123.484 | 62.4864 | -0.982704   | 1.20207     | 0.22934 | 0.898537  |
| gene1069 | gene1069 | SACOL1084 | gi 57650036 ref NC_002951.2 :1094420-1096620 | MR150 | M36C05 | OK     | 9.33282 | 4.72503 | -0.981991   | 0.707372    | 0.47934 | 0.999883  |
| gene107  | gene107  | SACOL0111 | gi 57650036 ref NC_002951.2 :126368-127145   | MR150 | M36C05 | OK     | 702.367 | 712.009 | 0.0196711   | -0.020645   | 0.98353 | 0.999883  |
| gene1070 | gene1070 | SACOL1085 | gi 57650036 ref NC_002951.2 :1094420-1096620 | MR150 | M36C05 | OK     | 9.30923 | 9.91279 | 0.0906305   | -0.112185   | 0.91068 | 0.999883  |
| gene1071 | gene1071 | SACOL1086 | gi 57650036 ref NC_002951.2 :1096634-1097210 | MR150 | M36C05 | OK     | 7.3267  | 6.16611 | -0.248803   | 0.341406    | 0.7328  | 0.999883  |
| gene1072 | gene1072 | SACOL1087 | gi 57650036 ref NC_002951.2 :1097856-1097991 | MR150 | M36C05 | OK     | 0       | 343.556 | 1.79769e+30 | 1.79769e+30 | 0.00944 | 0.161634  |
| gene1073 | gene1073 | SACOL1088 | gi 57650036 ref NC_002951.2 :1098142-1099438 | MR150 | M36C05 | OK     | 183.893 | 273.19  | 0.571034    | -0.627904   | 0.53007 | 0.999883  |
| gene1074 | gene1074 | SACOL1089 | gi 57650036 ref NC_002951.2 :1099862-1101035 | MR150 | M36C05 | OK     | 19.5169 | 15.2971 | -0.351465   | 0.508533    | 0.61108 | 0.999883  |
| gene1075 | gene1075 | SACOL1090 | gi 57650036 ref NC_002951.2 :1101088-1101631 | MR150 | M36C05 | OK     | 37.4748 | 246.264 | 2.71621     | -3.6304     | 0.00028 | 0.0128802 |
| gene1076 | gene1076 | ptsH      | gi 57650036 ref NC_002951.2 :1101784-1102051 | MR150 | M36C05 | OK     | 351.212 | 658.333 | 0.906476    | -1.22081    | 0.22216 | 0.89416   |
| gene1077 | gene1077 | ptsI      | gi 57650036 ref NC_002951.2 :1102053-1103772 | MR150 | M36C05 | OK     | 411.804 | 470.691 | 0.192825    | -0.197584   | 0.84337 | 0.999883  |
| gene1078 | gene1078 | SACOL1093 | gi 57650036 ref NC_002951.2 :1104008-1104242 | MR150 | M36C05 | OK     | 30.7429 | 12.001  | -1.3571     | 1.59097     | 0.11162 | 0.663742  |
| gene1079 | gene1079 | cydA      | gi 57650036 ref NC_002951.2 :1104439-1106817 | MR150 | M36C05 | OK     | 2.89965 | 8.91759 | 1.62077     | -1.78307    | 0.07457 | 0.53808   |
| gene108  | gene108  | SACOL0112 | gi 57650036 ref NC_002951.2 :127288-127411   | MR150 | M36C05 | NOTEST | 0       | 0       | 0           | 0           | 1       | 1         |
| gene1080 | gene1080 | cydB      | gi 57650036 ref NC_002951.2 :1104439-1106817 | MR150 | M36C05 | OK     | 3.73496 | 7.53068 | 1.01169     | -0.952179   | 0.34101 | 0.999883  |
| gene1081 | gene1081 | SACOL1096 | gi 57650036 ref NC_002951.2 :1106949-1107612 | MR150 | M36C05 | OK     | 21.8212 | 52.2005 | 1.25833     | -1.81292    | 0.06984 | 0.522414  |

|          |          |           |                                              |       |        |        |         |         |             |             |         |           |
|----------|----------|-----------|----------------------------------------------|-------|--------|--------|---------|---------|-------------|-------------|---------|-----------|
| gene1082 | gene1082 | SACOL1097 | gi 57650036 ref NC_002951.2 :1107647-1107827 | MR150 | M36C05 | OK     | 90.3482 | 139.732 | 0.629091    | -0.84214    | 0.39971 | 0.999883  |
| gene1083 | gene1083 | SACOL1098 | gi 57650036 ref NC_002951.2 :1107960-1109876 | MR150 | M36C05 | OK     | 200.301 | 162.826 | -0.298841   | 0.318228    | 0.75031 | 0.999883  |
| gene1084 | gene1084 | SACOL1099 | gi 57650036 ref NC_002951.2 :1107960-1109876 | MR150 | M36C05 | OK     | 97.9759 | 185.1   | 0.917809    | -0.139274   | 0.88923 | 0.999883  |
| gene1085 | gene1085 | def       | gi 57650036 ref NC_002951.2 :1110356-1110908 | MR150 | M36C05 | OK     | 38.6923 | 26.976  | -0.52037    | 0.762337    | 0.44586 | 0.999883  |
| gene1086 | gene1086 | SACOL1101 | gi 57650036 ref NC_002951.2 :1111272-1111899 | MR150 | M36C05 | OK     | 115.429 | 105.207 | -0.13377    | 0.176771    | 0.85969 | 0.999883  |
| gene1087 | gene1087 | pdhA      | gi 57650036 ref NC_002951.2 :1112069-1113182 | MR150 | M36C05 | OK     | 259.819 | 291.769 | 0.16732     | -0.183586   | 0.85434 | 0.999883  |
| gene1088 | gene1088 | pdhB      | gi 57650036 ref NC_002951.2 :1113185-1114163 | MR150 | M36C05 | OK     | 242.488 | 248.052 | 0.0327289   | -0.036916   | 0.97055 | 0.999883  |
| gene1089 | gene1089 | pdhC      | gi 57650036 ref NC_002951.2 :1114253-1115546 | MR150 | M36C05 | OK     | 294.953 | 266.678 | -0.145384   | 0.156485    | 0.87565 | 0.999883  |
| gene109  | gene109  | SACOL0113 | gi 57650036 ref NC_002951.2 :127489-129116   | MR150 | M36C05 | NOTEST | 0.59506 | 0.57139 | -0.0585685  | 0.048514    | 0.96131 | 1         |
| gene1090 | gene1090 | pdhD      | gi 57650036 ref NC_002951.2 :1115549-1116956 | MR150 | M36C05 | OK     | 527.735 | 532.08  | 0.0118292   | -0.012133   | 0.99032 | 0.999883  |
| gene1091 | gene1091 | SACOL1106 | gi 57650036 ref NC_002951.2 :1117123-1117399 | MR150 | M36C05 | OK     | 59.1421 | 40.0039 | -0.564045   | 0.809347    | 0.41832 | 0.999883  |
| gene1092 | gene1092 | SACOL1107 | gi 57650036 ref NC_002951.2 :1117542-1118082 | MR150 | M36C05 | OK     | 9.00114 | 1.62379 | -2.47075    | 2.89333     | 0.00381 | 0.0910432 |
| gene1093 | gene1093 | SACOL1108 | gi 57650036 ref NC_002951.2 :1118094-1119979 | MR150 | M36C05 | OK     | 5.81759 | 1.97115 | -1.56139    | 1.75333     | 0.07955 | 0.560699  |
| gene1094 | gene1094 | SACOL1109 | gi 57650036 ref NC_002951.2 :1118094-1119979 | MR150 | M36C05 | OK     | 3.58445 | 2.39812 | -0.579848   | 0.495715    | 0.6201  | 0.999883  |
| gene1095 | gene1095 | SACOL1110 | gi 57650036 ref NC_002951.2 :1119984-1121867 | MR150 | M36C05 | OK     | 8.28296 | 2.35088 | -1.81695    | 0.582628    | 0.56014 | 0.999883  |
| gene1096 | gene1096 | SACOL1111 | gi 57650036 ref NC_002951.2 :1119984-1121867 | MR150 | M36C05 | OK     | 13.842  | 49.833  | 1.84805     | -2.32458    | 0.02009 | 0.261084  |
| gene1097 | gene1097 | SACOL1112 | gi 57650036 ref NC_002951.2 :1121940-1122960 | MR150 | M36C05 | OK     | 271.345 | 484.787 | 0.837223    | -0.903998   | 0.366   | 0.999883  |
| gene1098 | gene1098 | SACOL1113 | gi 57650036 ref NC_002951.2 :1123242-1123662 | MR150 | M36C05 | OK     | 177.451 | 237.302 | 0.419298    | -0.556224   | 0.57806 | 0.999883  |
| gene1099 | gene1099 | SACOL1114 | gi 57650036 ref NC_002951.2 :1123743-1125096 | MR150 | M36C05 | OK     | 386.67  | 1171.88 | 1.59965     | -1.65661    | 0.0976  | 0.629513  |
| gene11   | gene11   | SACOL0012 | gi 57650036 ref NC_002951.2 :16111-17101     | MR150 | M36C05 | OK     | 2.51987 | 6.28149 | 1.31775     | -1.8284     | 0.06749 | 0.520149  |
| gene110  | gene110  | SACOL0114 | gi 57650036 ref NC_002951.2 :127489-129116   | MR150 | M36C05 | OK     | 0       | 1.34297 | 1.79769e+30 | 1.79769e+30 | 0.02857 | 0.321026  |
| gene1100 | gene1100 | SACOL1115 | gi 57650036 ref NC_002951.2 :1125279-1125894 | MR150 | M36C05 | OK     | 197.324 | 339.661 | 0.783527    | -0.94192    | 0.34623 | 0.999883  |
| gene1101 | gene1101 | SACOL1116 | gi 57650036 ref NC_002951.2 :1126050-1126878 | MR150 | M36C05 | OK     | 146.773 | 247.31  | 0.752737    | -0.893729   | 0.37147 | 0.999883  |
| gene1102 | gene1102 | SACOL1117 | gi 57650036 ref NC_002951.2 :1127031-1127223 | MR150 | M36C05 | OK     | 372.293 | 308.176 | -0.272683   | 0.400865    | 0.68852 | 0.999883  |
| gene1103 | gene1103 | typA      | gi 57650036 ref NC_002951.2 :1127324-1129172 | MR150 | M36C05 | OK     | 93.3141 | 23.8749 | -1.9666     | 2.43626     | 0.01484 | 0.211829  |
| gene1104 | gene1104 | SACOL1119 | gi 57650036 ref NC_002951.2 :1129311-1129479 | MR150 | M36C05 | OK     | 96.0281 | 84.513  | -0.184285   | 0.224689    | 0.82222 | 0.999883  |
| gene1105 | gene1105 | SACOL1120 | gi 57650036 ref NC_002951.2 :1129480-1129963 | MR150 | M36C05 | OK     | 91.864  | 80.3683 | -0.192874   | 0.272396    | 0.78532 | 0.999883  |
| gene1106 | gene1106 | SACOL1121 | gi 57650036 ref NC_002951.2 :1130103-1130379 | MR150 | M36C05 | OK     | 1125.44 | 411.29  | -1.45226    | 1.85874     | 0.06306 | 0.504373  |
| gene1107 | gene1107 | SACOL1122 | gi 57650036 ref NC_002951.2 :1130692-1131919 | MR150 | M36C05 | OK     | 93.7974 | 98.1169 | 0.0649537   | -0.078936   | 0.93708 | 0.999883  |
| gene1108 | gene1108 | pyc       | gi 57650036 ref NC_002951.2 :1132472-1135925 | MR150 | M36C05 | OK     | 81.3258 | 198.42  | 1.28677     | -1.36014    | 0.17379 | 0.821477  |
| gene1109 | gene1109 | ctaA      | gi 57650036 ref NC_002951.2 :1136064-1137135 | MR150 | M36C05 | OK     | 59.7782 | 43.4219 | -0.461195   | 0.613045    | 0.53985 | 0.999883  |
| gene111  | gene111  | SACOL0115 | gi 57650036 ref NC_002951.2 :129325-133131   | MR150 | M36C05 | OK     | 0.79185 | 1.82425 | 1.204       | -0.744015   | 0.45687 | 0.999883  |
| gene1110 | gene1110 | ctaB      | gi 57650036 ref NC_002951.2 :1137415-1138327 | MR150 | M36C05 | OK     | 164.306 | 77.9143 | -1.07643    | 1.33634     | 0.18144 | 0.828964  |

|          |          |           |                                              |       |        |        |         |         |           |           |         |          |
|----------|----------|-----------|----------------------------------------------|-------|--------|--------|---------|---------|-----------|-----------|---------|----------|
| gene1111 | gene1111 | SACOL1126 | gi 57650036 ref NC_002951.2 :1138351-1138813 | MR150 | M36C05 | OK     | 204.772 | 66.5594 | -1.62131  | 2.21977   | 0.02643 | 0.309053 |
| gene1112 | gene1112 | SACOL1127 | gi 57650036 ref NC_002951.2 :1139024-1139228 | MR150 | M36C05 | OK     | 13.7972 | 19.6997 | 0.513796  | -0.525651 | 0.59913 | 0.999883 |
| gene1113 | gene1113 | SACOL1128 | gi 57650036 ref NC_002951.2 :1139277-1140177 | MR150 | M36C05 | OK     | 47.9051 | 91.0684 | 0.926771  | -1.22526  | 0.22048 | 0.89416  |
| gene1114 | gene1114 | SACOL1129 | gi 57650036 ref NC_002951.2 :1140192-1140627 | MR150 | M36C05 | OK     | 99.3989 | 87.2685 | -0.187768 | 0.26746   | 0.78912 | 0.999883 |
| gene1115 | gene1115 | SACOL1130 | gi 57650036 ref NC_002951.2 :1140689-1141616 | MR150 | M36C05 | OK     | 36.6488 | 50.6676 | 0.467298  | -0.643665 | 0.51979 | 0.999883 |
| gene1116 | gene1116 | SACOL1131 | gi 57650036 ref NC_002951.2 :1141854-1142109 | MR150 | M36C05 | OK     | 40.9563 | 12.3668 | -1.72761  | 2.16794   | 0.03016 | 0.330747 |
| gene1117 | gene1117 | SACOL1132 | gi 57650036 ref NC_002951.2 :1142111-1142501 | MR150 | M36C05 | OK     | 23.9751 | 5.77234 | -2.05431  | 2.68989   | 0.00715 | 0.136826 |
| gene1118 | gene1118 | SACOL1133 | gi 57650036 ref NC_002951.2 :1142570-1143113 | MR150 | M36C05 | OK     | 21.8603 | 16.0957 | -0.441639 | 0.645947  | 0.51831 | 0.999883 |
| gene1119 | gene1119 | coaD      | gi 57650036 ref NC_002951.2 :1143114-1143597 | MR150 | M36C05 | OK     | 61.6029 | 43.3052 | -0.508457 | 0.739615  | 0.45953 | 0.999883 |
| gene112  | gene112  | SACOL0116 | gi 57650036 ref NC_002951.2 :129325-133131   | MR150 | M36C05 | OK     | 0.737   | 1.48551 | 1.01123   | -0.608749 | 0.54269 | 0.999883 |
| gene1120 | gene1120 | SACOL1135 | gi 57650036 ref NC_002951.2 :1143658-1144798 | MR150 | M36C05 | OK     | 14.1738 | 8.9143  | -0.669036 | 0.980535  | 0.32682 | 0.999883 |
| gene1121 | gene1121 | SACOL1136 | gi 57650036 ref NC_002951.2 :1144924-1145482 | MR150 | M36C05 | OK     | 247.933 | 64.1493 | -1.95045  | 2.56498   | 0.01032 | 0.171267 |
| gene1122 | gene1122 | rpmF      | gi 57650036 ref NC_002951.2 :1145561-1145735 | MR150 | M36C05 | OK     | 2356.8  | 950.525 | -1.31004  | 1.83696   | 0.06622 | 0.515048 |
| gene1123 | gene1123 | isdB      | gi 57650036 ref NC_002951.2 :1145888-1147826 | MR150 | M36C05 | OK     | 1.85074 | 4.24858 | 1.19888   | -1.72229  | 0.08502 | 0.580986 |
| gene1124 | gene1124 | isdA      | gi 57650036 ref NC_002951.2 :1148028-1149081 | MR150 | M36C05 | OK     | 8.43775 | 6.33416 | -0.413705 | 0.604626  | 0.54543 | 0.999883 |
| gene1125 | gene1125 | isdC      | gi 57650036 ref NC_002951.2 :1149289-1151924 | MR150 | M36C05 | OK     | 2.53032 | 1.36799 | -0.887266 | 0.644797  | 0.51906 | 0.999883 |
| gene1126 | gene1126 | isdD      | gi 57650036 ref NC_002951.2 :1149289-1151924 | MR150 | M36C05 | NOTEST | 0.17462 | 0.88009 | 2.33347   | -0.919235 | 0.35797 | 1        |
| gene1127 | gene1127 | SACOL1143 | gi 57650036 ref NC_002951.2 :1149289-1151924 | MR150 | M36C05 | OK     | 2.02956 | 2.76143 | 0.444249  | -0.449581 | 0.65301 | 0.999883 |
| gene1128 | gene1128 | SACOL1144 | gi 57650036 ref NC_002951.2 :1151936-1152902 | MR150 | M36C05 | OK     | 2.39888 | 1.58364 | -0.599119 | 0.76173   | 0.44622 | 0.999883 |
| gene1129 | gene1129 | srtB      | gi 57650036 ref NC_002951.2 :1152963-1153698 | MR150 | M36C05 | OK     | 1.4308  | 0.82491 | -0.794509 | 0.820274  | 0.41206 | 0.999883 |
| gene113  | gene113  | SACOL0117 | gi 57650036 ref NC_002951.2 :129325-133131   | MR150 | M36C05 | OK     | 2.986   | 3.31323 | 0.150022  | -0.172422 | 0.86311 | 0.999883 |
| gene1130 | gene1130 | SACOL1146 | gi 57650036 ref NC_002951.2 :1153716-1154040 | MR150 | M36C05 | OK     | 5.90877 | 10.2428 | 0.793678  | -0.933499 | 0.35056 | 0.999883 |
| gene1131 | gene1131 | SACOL1147 | gi 57650036 ref NC_002951.2 :1154423-1155164 | MR150 | M36C05 | OK     | 28.5819 | 24.6765 | -0.211966 | 0.3088    | 0.75747 | 0.999883 |
| gene1132 | gene1132 | pheS      | gi 57650036 ref NC_002951.2 :1155544-1159005 | MR150 | M36C05 | OK     | 19.6101 | 8.72881 | -1.16774  | 0.748753  | 0.45401 | 0.999883 |
| gene1133 | gene1133 | pheT      | gi 57650036 ref NC_002951.2 :1155544-1159005 | MR150 | M36C05 | OK     | 19.9555 | 13.3558 | -0.57932  | 0.664704  | 0.50624 | 0.999883 |
| gene1134 | gene1134 | rnhC      | gi 57650036 ref NC_002951.2 :1159175-1160114 | MR150 | M36C05 | OK     | 6.2162  | 3.88006 | -0.679954 | 0.963306  | 0.33539 | 0.999883 |
| gene1135 | gene1135 | SACOL1151 | gi 57650036 ref NC_002951.2 :1160483-1160750 | MR150 | M36C05 | OK     | 91.1252 | 51.7943 | -0.815057 | 1.18319   | 0.23673 | 0.90647  |
| gene1136 | gene1136 | SACOL1152 | gi 57650036 ref NC_002951.2 :1160750-1161272 | MR150 | M36C05 | OK     | 124.015 | 34.9783 | -1.82598  | 2.55852   | 0.01051 | 0.172504 |
| gene1137 | gene1137 | SACOL1153 | gi 57650036 ref NC_002951.2 :1161344-1163057 | MR150 | M36C05 | OK     | 31.8885 | 29.5759 | -0.108611 | 0.143697  | 0.88574 | 0.999883 |
| gene1138 | gene1138 | SACOL1154 | gi 57650036 ref NC_002951.2 :1163066-1165415 | MR150 | M36C05 | OK     | 36.9222 | 30.9727 | -0.253492 | 0.319497  | 0.74935 | 0.999883 |
| gene1139 | gene1139 | trxA      | gi 57650036 ref NC_002951.2 :1165587-1165902 | MR150 | M36C05 | OK     | 1223.6  | 1303.66 | 0.0914356 | -0.105554 | 0.91594 | 0.999883 |
| gene114  | gene114  | sodA1     | gi 57650036 ref NC_002951.2 :133398-133998   | MR150 | M36C05 | OK     | 248.338 | 62.9228 | -1.98065  | 2.57567   | 0.01    | 0.167602 |
| gene1140 | gene1140 | SACOL1156 | gi 57650036 ref NC_002951.2 :1165964-1166060 | MR150 | M36C05 | NOTEST | 0       | 0       | 0         | 0         | 1       | 1        |

|          |          |             |                                              |       |        |        |         |         |             |             |         |           |
|----------|----------|-------------|----------------------------------------------|-------|--------|--------|---------|---------|-------------|-------------|---------|-----------|
| gene1141 | gene1141 | uvrC        | gi 57650036 ref NC_002951.2 :1166225-1168007 | MR150 | M36C05 | OK     | 13.8451 | 30.445  | 1.13683     | -1.55582    | 0.11975 | 0.687616  |
| gene1142 | gene1142 | sdhC        | gi 57650036 ref NC_002951.2 :1168330-1168945 | MR150 | M36C05 | OK     | 404.975 | 201.881 | -1.00433    | 1.19347     | 0.23269 | 0.902162  |
| gene1143 | gene1143 | sdhA        | gi 57650036 ref NC_002951.2 :1168996-1171578 | MR150 | M36C05 | OK     | 711.391 | 458.375 | -0.634114   | 0.452116    | 0.65119 | 0.999883  |
| gene1144 | gene1144 | sdhB        | gi 57650036 ref NC_002951.2 :1168996-1171578 | MR150 | M36C05 | OK     | 2041.88 | 1374.56 | -0.570926   | 0.437212    | 0.66196 | 0.999883  |
| gene1145 | gene1145 | murI        | gi 57650036 ref NC_002951.2 :1171813-1172614 | MR150 | M36C05 | OK     | 122.282 | 174.738 | 0.51498     | -0.634269   | 0.52591 | 0.999883  |
| gene1146 | gene1146 | SACOL1162   | gi 57650036 ref NC_002951.2 :1172625-1173709 | MR150 | M36C05 | OK     | 155.026 | 196.04  | 0.338641    | -0.258422   | 0.79608 | 0.999883  |
| gene1147 | gene1147 | SACOL1163   | gi 57650036 ref NC_002951.2 :1172625-1173709 | MR150 | M36C05 | OK     | 265.689 | 307.292 | 0.20987     | -0.181436   | 0.85603 | 0.999883  |
| gene1148 | gene1148 | SACOL1164   | gi 57650036 ref NC_002951.2 :1174197-1174527 | MR150 | M36C05 | OK     | 677.105 | 364.596 | -0.89308    | 1.13315     | 0.25715 | 0.935184  |
| gene1149 | gene1149 | SACOL1165   | gi 57650036 ref NC_002951.2 :1174697-1174805 | MR150 | M36C05 | NOTEST | 0       | 0       | 0           | 0           | 1       | 1         |
| gene115  | gene115  | SACOL0119   | gi 57650036 ref NC_002951.2 :134365-135091   | MR150 | M36C05 | OK     | 22.4111 | 17.4103 | -0.364271   | 0.53478     | 0.5928  | 0.999883  |
| gene1150 | gene1150 | SACOL1166   | gi 57650036 ref NC_002951.2 :1174895-1175297 | MR150 | M36C05 | OK     | 18.8325 | 13.0585 | -0.528244   | 0.740931    | 0.45874 | 0.999883  |
| gene1151 | gene1151 | SACOL1167   | gi 57650036 ref NC_002951.2 :1175968-1176475 | MR150 | M36C05 | OK     | 15.9455 | 7.91298 | -1.01086    | 1.42095     | 0.15533 | 0.769852  |
| gene1152 | gene1152 | efb         | gi 57650036 ref NC_002951.2 :1176733-1177231 | MR150 | M36C05 | OK     | 180.68  | 57.8039 | -1.64419    | 2.25138     | 0.02436 | 0.296308  |
| gene1153 | gene1153 | SACOL1169   | gi 57650036 ref NC_002951.2 :1177384-1177735 | MR150 | M36C05 | OK     | 336.183 | 69.4914 | -2.27434    | 3.14222     | 0.00168 | 0.0507715 |
| gene1154 | gene1154 | SACOL1170   | gi 57650036 ref NC_002951.2 :1178160-1178406 | MR150 | M36C05 | OK     | 0       | 10.2897 | 1.79769e+30 | 1.79769e+30 | 0.0141  | 0.204943  |
| gene1155 | gene1155 | SACOL1171   | gi 57650036 ref NC_002951.2 :1178556-1178742 | MR150 | M36C05 | OK     | 41.8899 | 24.8235 | -0.754897   | 0.821274    | 0.41149 | 0.999883  |
| gene1156 | gene1156 | SACOL1172   | gi 57650036 ref NC_002951.2 :1179363-1179597 | MR150 | M36C05 | OK     | 86.6392 | 30.0025 | -1.52994    | 2.08922     | 0.03669 | 0.368762  |
| gene1157 | gene1157 | hly         | gi 57650036 ref NC_002951.2 :1180073-1181033 | MR150 | M36C05 | OK     | 2.41781 | 1.16084 | -1.05853    | 1.29767     | 0.1944  | 0.856906  |
| gene1158 | gene1158 | SACOL1174   | gi 57650036 ref NC_002951.2 :1181705-1182033 | MR150 | M36C05 | NOTEST | 0       | 0       | 0           | 0           | 1       | 1         |
| gene1159 | gene1159 | SACOL1175   | gi 57650036 ref NC_002951.2 :1181705-1182033 | MR150 | M36C05 | OK     | 67.9226 | 37.2726 | -0.865779   | 1.08926     | 0.27604 | 0.961224  |
| gene116  | gene116  | SACOL0120   | gi 57650036 ref NC_002951.2 :135282-136038   | MR150 | M36C05 | OK     | 19.8259 | 10.9135 | -0.861272   | 1.26138     | 0.20717 | 0.881947  |
| gene1160 | gene1160 | SACOL1176   | gi 57650036 ref NC_002951.2 :1182064-1182421 | MR150 | M36C05 | OK     | 48.489  | 41.3741 | -0.22893    | 0.272891    | 0.78494 | 0.999883  |
| gene1161 | gene1161 | SACOL1177   | gi 57650036 ref NC_002951.2 :1182064-1182421 | MR150 | M36C05 | OK     | 168.007 | 1061.04 | 2.65888     | -1.43391    | 0.1516  | 0.757479  |
| gene1162 | gene1162 | SACOL1178   | gi 57650036 ref NC_002951.2 :1182589-1183306 | MR150 | M36C05 | OK     | 2.07281 | 3.20131 | 0.627071    | -0.781233   | 0.43467 | 0.999883  |
| gene1163 | gene1163 | SACOL1179   | gi 57650036 ref NC_002951.2 :1183413-1184139 | MR150 | M36C05 | OK     | 1.45527 | 2.30739 | 0.66498     | -0.776522   | 0.43744 | 0.999883  |
| gene1164 | gene1164 | SACOL1180   | gi 57650036 ref NC_002951.2 :1184233-1184959 | MR150 | M36C05 | OK     | 0.58211 | 1.46834 | 1.33483     | -1.28289    | 0.19953 | 0.867146  |
| gene1165 | gene1165 | arcB1       | gi 57650036 ref NC_002951.2 :1185396-1186398 | MR150 | M36C05 | OK     | 1.14563 | 4.67492 | 2.02881     | -2.58267    | 0.0098  | 0.16462   |
| gene1166 | gene1166 | arcC1       | gi 57650036 ref NC_002951.2 :1186420-1187353 | MR150 | M36C05 | OK     | 3.13353 | 5.56688 | 0.82908     | -1.15558    | 0.24785 | 0.922459  |
| gene1167 | gene1167 | SACOL1183   | gi 57650036 ref NC_002951.2 :1187524-1189081 | MR150 | M36C05 | OK     | 2.14449 | 11.453  | 2.41702     | -3.43746    | 0.00059 | 0.0229705 |
| gene1168 | gene1168 | SACOL1184   | gi 57650036 ref NC_002951.2 :1189920-1190868 | MR150 | M36C05 | OK     | 18.0149 | 16.2179 | -0.151604   | 0.22172     | 0.82453 | 0.999883  |
| gene1169 | gene1169 | SACOL1185   | gi 57650036 ref NC_002951.2 :1191116-1191305 | MR150 | M36C05 | OK     | 25.8623 | 18.4185 | -0.489692   | 0.493536    | 0.62163 | 0.999883  |
| gene117  | gene117  | deoD1       | gi 57650036 ref NC_002951.2 :136273-136981   | MR150 | M36C05 | OK     | 4.21902 | 1.52046 | -1.4724     | 1.78911     | 0.0736  | 0.532623  |
| gene1170 | gene1170 | SACOL_tRNA- | gi 57650036 ref NC_002951.2 :1191779-1191853 | MR150 | M36C05 | NOTEST | 0       | 0       | 0           | 0           | 1       | 1         |

|          |          |           |                                              |       |        |        |         |         |             |             |          |           |
|----------|----------|-----------|----------------------------------------------|-------|--------|--------|---------|---------|-------------|-------------|----------|-----------|
| gene1171 | gene1171 | SACOL1186 | gi 57650036 ref NC_002951.2 :1192216-1192351 | MR150 | M36C05 | NOTEST | 0       | 0       | 0           | 0           | 1        | 1         |
| gene1172 | gene1172 | SACOL1187 | gi 57650036 ref NC_002951.2 :1192407-1192542 | MR150 | M36C05 | OK     | 0       | 85.8891 | 1.79769e+30 | 1.79769e+30 | 0.06916  | 0.522414  |
| gene1173 | gene1173 | SACOL1188 | gi 57650036 ref NC_002951.2 :1192665-1193361 | MR150 | M36C05 | OK     | 37.9632 | 72.081  | 0.925017    | -1.29297    | 0.19602  | 0.858721  |
| gene1174 | gene1174 | SACOL1189 | gi 57650036 ref NC_002951.2 :1193469-1193910 | MR150 | M36C05 | OK     | 791.498 | 1560.11 | 0.978991    | -1.06733    | 0.28582  | 0.973566  |
| gene1175 | gene1175 | SACOL1190 | gi 57650036 ref NC_002951.2 :1194104-1195718 | MR150 | M36C05 | OK     | 44.5191 | 50.356  | 0.177739    | -0.226199   | 0.82105  | 0.999883  |
| gene1176 | gene1176 | mraZ      | gi 57650036 ref NC_002951.2 :1195861-1196293 | MR150 | M36C05 | OK     | 247.385 | 142.551 | -0.795285   | 1.05843     | 0.28986  | 0.975616  |
| gene1177 | gene1177 | mraW      | gi 57650036 ref NC_002951.2 :1196308-1197244 | MR150 | M36C05 | OK     | 107.77  | 53.4937 | -1.01052    | 1.30743     | 0.19107  | 0.851696  |
| gene1178 | gene1178 | SACOL1193 | gi 57650036 ref NC_002951.2 :1197272-1199874 | MR150 | M36C05 | OK     | 140.382 | 61.5419 | -1.18972    | 0.712008    | 0.47646  | 0.999883  |
| gene1179 | gene1179 | pbp1      | gi 57650036 ref NC_002951.2 :1197272-1199874 | MR150 | M36C05 | OK     | 56.4529 | 11.6971 | -2.2709     | 2.45618     | 0.01404  | 0.204943  |
| gene118  | gene118  | SACOL0122 | gi 57650036 ref NC_002951.2 :136987-138340   | MR150 | M36C05 | OK     | 6.77437 | 4.39802 | -0.623234   | 0.910064    | 0.36279  | 0.999883  |
| gene1180 | gene1180 | mraY      | gi 57650036 ref NC_002951.2 :1200165-1201131 | MR150 | M36C05 | OK     | 35.9832 | 5.75868 | -2.64351    | 3.74746     | 0.00018  | 0.0092341 |
| gene1181 | gene1181 | murD      | gi 57650036 ref NC_002951.2 :1201132-1202482 | MR150 | M36C05 | OK     | 49.6751 | 9.29829 | -2.41749    | 3.3213      | 0.0009   | 0.0319428 |
| gene1182 | gene1182 | divIB     | gi 57650036 ref NC_002951.2 :1202497-1203817 | MR150 | M36C05 | OK     | 56.8852 | 31.9892 | -0.830469   | 1.09436     | 0.2738   | 0.958793  |
| gene1183 | gene1183 | ftsA      | gi 57650036 ref NC_002951.2 :1203922-1205335 | MR150 | M36C05 | OK     | 247.853 | 268.267 | 0.114185    | -0.122667   | 0.90237  | 0.999883  |
| gene1184 | gene1184 | ftsZ      | gi 57650036 ref NC_002951.2 :1205367-1206540 | MR150 | M36C05 | OK     | 499.255 | 669.446 | 0.423193    | -0.436436   | 0.66252  | 0.999883  |
| gene1185 | gene1185 | SACOL1200 | gi 57650036 ref NC_002951.2 :1206799-1207591 | MR150 | M36C05 | OK     | 21.7245 | 40.4365 | 0.896332    | -1.28888    | 0.19744  | 0.861278  |
| gene1186 | gene1186 | SACOL1201 | gi 57650036 ref NC_002951.2 :1207608-1208843 | MR150 | M36C05 | OK     | 258.79  | 285.993 | 0.1442      | -0.128952   | 0.8974   | 0.999883  |
| gene1187 | gene1187 | ylmF      | gi 57650036 ref NC_002951.2 :1207608-1208843 | MR150 | M36C05 | OK     | 192.14  | 213.84  | 0.154378    | -0.104313   | 0.91692  | 0.999883  |
| gene1188 | gene1188 | ylmG      | gi 57650036 ref NC_002951.2 :1208854-1209145 | MR150 | M36C05 | OK     | 353.206 | 254.262 | -0.47419    | 0.655644    | 0.51205  | 0.999883  |
| gene1189 | gene1189 | ylmH      | gi 57650036 ref NC_002951.2 :1209254-1210034 | MR150 | M36C05 | OK     | 97.934  | 61.436  | -0.672725   | 0.892694    | 0.37202  | 0.999883  |
| gene119  | gene119  | deoC1     | gi 57650036 ref NC_002951.2 :138420-139083   | MR150 | M36C05 | OK     | 31.4093 | 37.6606 | 0.261864    | -0.379914   | 0.70401  | 0.999883  |
| gene1190 | gene1190 | SACOL1205 | gi 57650036 ref NC_002951.2 :1210057-1210675 | MR150 | M36C05 | OK     | 283.061 | 213.369 | -0.407764   | 0.492968    | 0.62204  | 0.999883  |
| gene1191 | gene1191 | ileS      | gi 57650036 ref NC_002951.2 :1210895-1213649 | MR150 | M36C05 | OK     | 77.4304 | 14.0221 | -2.4652     | 3.01934     | 0.00253  | 0.0691808 |
| gene1192 | gene1192 | SACOL1207 | gi 57650036 ref NC_002951.2 :1213938-1214736 | MR150 | M36C05 | OK     | 25.3472 | 26.5638 | 0.0676358   | -0.098258   | 0.92173  | 0.999883  |
| gene1193 | gene1193 | lspA      | gi 57650036 ref NC_002951.2 :1215559-1216968 | MR150 | M36C05 | OK     | 28.2852 | 7.94098 | -1.83266    | 1.16099     | 0.24565  | 0.919205  |
| gene1194 | gene1194 | SACOL1209 | gi 57650036 ref NC_002951.2 :1215559-1216968 | MR150 | M36C05 | OK     | 42.866  | 13.2099 | -1.69822    | 2.12351     | 0.03371  | 0.351535  |
| gene1195 | gene1195 | pyrR      | gi 57650036 ref NC_002951.2 :1217367-1217895 | MR150 | M36C05 | OK     | 112.423 | 32.6549 | -1.78356    | 2.51148     | 0.01202  | 0.187518  |
| gene1196 | gene1196 | uraA      | gi 57650036 ref NC_002951.2 :1218112-1219420 | MR150 | M36C05 | OK     | 72.0145 | 9.05405 | -2.99165    | 4.02214     | 5.77E-05 | 0.0035981 |
| gene1197 | gene1197 | pyrB      | gi 57650036 ref NC_002951.2 :1219447-1220329 | MR150 | M36C05 | OK     | 118.993 | 10.1885 | -3.54587    | 4.75778     | 1.96E-06 | 0.0001995 |
| gene1198 | gene1198 | pyrC      | gi 57650036 ref NC_002951.2 :1220346-1221621 | MR150 | M36C05 | OK     | 130.498 | 15.8955 | -3.03734    | 3.89885     | 9.67E-05 | 0.0055513 |
| gene1199 | gene1199 | carA      | gi 57650036 ref NC_002951.2 :1221622-1225889 | MR150 | M36C05 | OK     | 102.49  | 8.4439  | -3.60143    | 2.02169     | 0.04321  | 0.407214  |
| gene12   | gene12   | SACOL0013 | gi 57650036 ref NC_002951.2 :17406-18330     | MR150 | M36C05 | OK     | 78.8885 | 66.1106 | -0.254933   | 0.333261    | 0.73894  | 0.999883  |
| gene120  | gene120  | deoB      | gi 57650036 ref NC_002951.2 :139110-140289   | MR150 | M36C05 | OK     | 64.4492 | 76.692  | 0.250915    | -0.318272   | 0.75028  | 0.999883  |

|          |          |           |                                              |       |        |        |         |         |           |           |         |           |
|----------|----------|-----------|----------------------------------------------|-------|--------|--------|---------|---------|-----------|-----------|---------|-----------|
| gene1200 | gene1200 | carB      | gi 57650036 ref NC_002951.2 :1221622-1225889 | MR150 | M36C05 | OK     | 107.343 | 8.48446 | -3.66125  | 3.79198   | 0.00015 | 0.0081058 |
| gene1201 | gene1201 | pyrF      | gi 57650036 ref NC_002951.2 :1225998-1227302 | MR150 | M36C05 | OK     | 92.8457 | 9.62462 | -3.27003  | 3.58776   | 0.00033 | 0.0147179 |
| gene1202 | gene1202 | pyrE      | gi 57650036 ref NC_002951.2 :1225998-1227302 | MR150 | M36C05 | OK     | 71.3305 | 3.75093 | -4.2492   | 3.19319   | 0.00141 | 0.0444683 |
| gene1203 | gene1203 | SACOL1218 | gi 57650036 ref NC_002951.2 :1227331-1227544 | MR150 | M36C05 | OK     | 372.137 | 160.662 | -1.2118   | 1.76903   | 0.07689 | 0.551487  |
| gene1204 | gene1204 | SACOL1219 | gi 57650036 ref NC_002951.2 :1227980-1228382 | MR150 | M36C05 | OK     | 143.127 | 126.232 | -0.181225 | 0.25325   | 0.80008 | 0.999883  |
| gene1205 | gene1205 | SACOL1220 | gi 57650036 ref NC_002951.2 :1228644-1230342 | MR150 | M36C05 | OK     | 38.4447 | 45.2498 | 0.235126  | -0.30156  | 0.76299 | 0.999883  |
| gene1206 | gene1206 | gmk       | gi 57650036 ref NC_002951.2 :1230616-1231458 | MR150 | M36C05 | OK     | 222.381 | 202.013 | -0.138583 | 0.155518  | 0.87641 | 0.999883  |
| gene1207 | gene1207 | rpoZ      | gi 57650036 ref NC_002951.2 :1230616-1231458 | MR150 | M36C05 | OK     | 468.885 | 185.1   | -1.34093  | 0.556408  | 0.57793 | 0.999883  |
| gene1208 | gene1208 | coaBC     | gi 57650036 ref NC_002951.2 :1231667-1235281 | MR150 | M36C05 | OK     | 34.2525 | 43.5079 | 0.34507   | -0.206864 | 0.83612 | 0.999883  |
| gene1209 | gene1209 | priA      | gi 57650036 ref NC_002951.2 :1231667-1235281 | MR150 | M36C05 | OK     | 49.6493 | 46.0946 | -0.107178 | 0.106286  | 0.91536 | 0.999883  |
| gene121  | gene121  | SACOL0125 | gi 57650036 ref NC_002951.2 :140419-142032   | MR150 | M36C05 | OK     | 1.73989 | 2.68609 | 0.626516  | -0.611309 | 0.541   | 0.999883  |
| gene1210 | gene1210 | SACOL1225 | gi 57650036 ref NC_002951.2 :1235786-1236740 | MR150 | M36C05 | OK     | 26.1982 | 30.1298 | 0.201723  | -0.288067 | 0.7733  | 0.999883  |
| gene1211 | gene1211 | SACOL1226 | gi 57650036 ref NC_002951.2 :1236902-1237181 | MR150 | M36C05 | OK     | 1740.8  | 3536.74 | 1.02267   | -1.13438  | 0.25664 | 0.934247  |
| gene1212 | gene1212 | def2      | gi 57650036 ref NC_002951.2 :1237404-1240125 | MR150 | M36C05 | OK     | 58.2134 | 23.3056 | -1.32067  | 0.58284   | 0.56    | 0.999883  |
| gene1213 | gene1213 | fmt       | gi 57650036 ref NC_002951.2 :1237404-1240125 | MR150 | M36C05 | OK     | 54.0932 | 32.0662 | -0.754394 | 0.557589  | 0.57713 | 0.999883  |
| gene1214 | gene1214 | sun       | gi 57650036 ref NC_002951.2 :1237404-1240125 | MR150 | M36C05 | OK     | 61.6478 | 23.2818 | -1.40484  | 1.2316    | 0.2181  | 0.89416   |
| gene1215 | gene1215 | SACOL1230 | gi 57650036 ref NC_002951.2 :1240127-1241222 | MR150 | M36C05 | OK     | 54.5826 | 23.2842 | -1.22909  | 1.68368   | 0.09224 | 0.611738  |
| gene1216 | gene1216 | SACOL1231 | gi 57650036 ref NC_002951.2 :1241228-1243963 | MR150 | M36C05 | OK     | 50.3759 | 15.6165 | -1.68967  | 0.823961  | 0.40996 | 0.999883  |
| gene1217 | gene1217 | SACOL1232 | gi 57650036 ref NC_002951.2 :1241228-1243963 | MR150 | M36C05 | OK     | 84.3085 | 22.7169 | -1.89191  | 2.10597   | 0.03521 | 0.358866  |
| gene1218 | gene1218 | SACOL1234 | gi 57650036 ref NC_002951.2 :1244190-1245066 | MR150 | M36C05 | OK     | 44.1688 | 35.2423 | -0.32572  | 0.45599   | 0.6484  | 0.999883  |
| gene1219 | gene1219 | rpe       | gi 57650036 ref NC_002951.2 :1245066-1245711 | MR150 | M36C05 | OK     | 45.7502 | 38.1948 | -0.260401 | 0.374891  | 0.70774 | 0.999883  |
| gene122  | gene122  | SACOL0126 | gi 57650036 ref NC_002951.2 :140419-142032   | MR150 | M36C05 | OK     | 2.03804 | 2.20259 | 0.112015  | -0.106663 | 0.91506 | 0.999883  |
| gene1220 | gene1220 | SACOL1236 | gi 57650036 ref NC_002951.2 :1245717-1246359 | MR150 | M36C05 | OK     | 54.3721 | 26.4687 | -1.03858  | 1.4948    | 0.13497 | 0.729547  |
| gene1221 | gene1221 | rpmB      | gi 57650036 ref NC_002951.2 :1246739-1246928 | MR150 | M36C05 | OK     | 19707   | 9425.67 | -1.06404  | 1.14155   | 0.25364 | 0.931299  |
| gene1222 | gene1222 | SACOL1239 | gi 57650036 ref NC_002951.2 :1247370-1247745 | MR150 | M36C05 | OK     | 102.856 | 76.7937 | -0.421564 | 0.61166   | 0.54076 | 0.999883  |
| gene1223 | gene1223 | SACOL1240 | gi 57650036 ref NC_002951.2 :1247759-1249406 | MR150 | M36C05 | OK     | 118.34  | 37.705  | -1.65011  | 2.00218   | 0.04527 | 0.41665   |
| gene1224 | gene1224 | recG      | gi 57650036 ref NC_002951.2 :1249595-1251656 | MR150 | M36C05 | OK     | 35.7212 | 68.9897 | 0.949603  | -1.16122  | 0.24555 | 0.919205  |
| gene1225 | gene1225 | SACOL1242 | gi 57650036 ref NC_002951.2 :1251858-1252431 | MR150 | M36C05 | OK     | 79.5997 | 34.0388 | -1.22558  | 1.74381   | 0.08119 | 0.567724  |
| gene1226 | gene1226 | plsX      | gi 57650036 ref NC_002951.2 :1252435-1255068 | MR150 | M36C05 | OK     | 59.54   | 37.2723 | -0.675755 | 0.460855  | 0.6449  | 0.999883  |
| gene1227 | gene1227 | fabD      | gi 57650036 ref NC_002951.2 :1252435-1255068 | MR150 | M36C05 | OK     | 67.1894 | 30.6433 | -1.13266  | 0.731652  | 0.46438 | 0.999883  |
| gene1228 | gene1228 | fabG1     | gi 57650036 ref NC_002951.2 :1252435-1255068 | MR150 | M36C05 | OK     | 105.307 | 60.8374 | -0.791572 | 0.581443  | 0.56094 | 0.999883  |
| gene1229 | gene1229 | SACOL1246 | gi 57650036 ref NC_002951.2 :1255190-1255289 | MR150 | M36C05 | NOTEST | 0       | 0       | 0         | 0         | 1       | 1         |
| gene123  | gene123  | SACOL0127 | gi 57650036 ref NC_002951.2 :142033-142807   | MR150 | M36C05 | OK     | 1.60038 | 1.34537 | -0.250415 | 0.285017  | 0.77563 | 0.999883  |

|          |          |           |                                              |       |        |        |         |         |            |           |         |           |
|----------|----------|-----------|----------------------------------------------|-------|--------|--------|---------|---------|------------|-----------|---------|-----------|
| gene1230 | gene1230 | acpP      | gi 57650036 ref NC_002951.2 :1255310-1255544 | MR150 | M36C05 | OK     | 1173.82 | 298.025 | -1.97771   | 2.6816    | 0.00733 | 0.137988  |
| gene1231 | gene1231 | rnc       | gi 57650036 ref NC_002951.2 :1255659-1256391 | MR150 | M36C05 | OK     | 16.1153 | 19.9098 | 0.305046   | -0.448295 | 0.65394 | 0.999883  |
| gene1232 | gene1232 | SACOL1250 | gi 57650036 ref NC_002951.2 :1256537-1261673 | MR150 | M36C05 | OK     | 19.791  | 11.4863 | -0.784933  | 0.837963  | 0.40205 | 0.999883  |
| gene1233 | gene1233 | SACOL1251 | gi 57650036 ref NC_002951.2 :1256537-1261673 | MR150 | M36C05 | OK     | 27.3949 | 10.4896 | -1.38495   | 0.87799   | 0.37995 | 0.999883  |
| gene1234 | gene1234 | SACOL1252 | gi 57650036 ref NC_002951.2 :1256537-1261673 | MR150 | M36C05 | OK     | 15.563  | 8.83373 | -0.817029  | 0.155532  | 0.8764  | 0.999883  |
| gene1235 | gene1235 | ffh       | gi 57650036 ref NC_002951.2 :1261698-1263066 | MR150 | M36C05 | OK     | 110.408 | 76.5424 | -0.528509  | 0.635508  | 0.5251  | 0.999883  |
| gene1236 | gene1236 | rpsP      | gi 57650036 ref NC_002951.2 :1263500-1263776 | MR150 | M36C05 | OK     | 280.055 | 57.5055 | -2.28394   | 3.26711   | 0.00109 | 0.0364367 |
| gene1237 | gene1237 | rimM      | gi 57650036 ref NC_002951.2 :1263963-1265204 | MR150 | M36C05 | OK     | 6.03839 | 3.26906 | -0.885287  | 0.688937  | 0.49086 | 0.999883  |
| gene1238 | gene1238 | trmD      | gi 57650036 ref NC_002951.2 :1263963-1265204 | MR150 | M36C05 | OK     | 8.25241 | 4.30661 | -0.938263  | 1.12879   | 0.25899 | 0.938582  |
| gene1239 | gene1239 | rplS      | gi 57650036 ref NC_002951.2 :1265306-1265657 | MR150 | M36C05 | OK     | 802.277 | 148.296 | -2.43562   | 3.13004   | 0.00175 | 0.0524863 |
| gene124  | gene124  | SACOL0128 | gi 57650036 ref NC_002951.2 :143020-143977   | MR150 | M36C05 | OK     | 4.85477 | 3.49634 | -0.47356   | 0.66325   | 0.50717 | 0.999883  |
| gene1240 | gene1240 | SACOL1259 | gi 57650036 ref NC_002951.2 :1265900-1268507 | MR150 | M36C05 | OK     | 6.23666 | 6.22619 | -0.0024245 | 0.003527  | 0.99719 | 0.999883  |
| gene1241 | gene1241 | rbgA      | gi 57650036 ref NC_002951.2 :1268907-1270543 | MR150 | M36C05 | OK     | 16.3179 | 13.364  | -0.288097  | 0.324459  | 0.74559 | 0.999883  |
| gene1242 | gene1242 | rnhB      | gi 57650036 ref NC_002951.2 :1268907-1270543 | MR150 | M36C05 | OK     | 13.7469 | 9.71144 | -0.501344  | 0.454848  | 0.64922 | 0.999883  |
| gene1243 | gene1243 | sucC      | gi 57650036 ref NC_002951.2 :1270651-1271818 | MR150 | M36C05 | OK     | 474.795 | 419.805 | -0.177583  | 0.185645  | 0.85272 | 0.999883  |
| gene1244 | gene1244 | sucD      | gi 57650036 ref NC_002951.2 :1271839-1272748 | MR150 | M36C05 | OK     | 840.122 | 965.376 | 0.200493   | -0.205679 | 0.83704 | 0.999883  |
| gene1245 | gene1245 | lytN      | gi 57650036 ref NC_002951.2 :1272941-1274093 | MR150 | M36C05 | OK     | 2.41297 | 2.08465 | -0.211009  | 0.283754  | 0.7766  | 0.999883  |
| gene1246 | gene1246 | eprH      | gi 57650036 ref NC_002951.2 :1274120-1275365 | MR150 | M36C05 | OK     | 5.27594 | 1.68797 | -1.64414   | 2.26456   | 0.02354 | 0.292706  |
| gene1247 | gene1247 | SACOL1266 | gi 57650036 ref NC_002951.2 :1275537-1276410 | MR150 | M36C05 | OK     | 2.50267 | 3.44163 | 0.45962    | -0.610831 | 0.54131 | 0.999883  |
| gene1248 | gene1248 | topA      | gi 57650036 ref NC_002951.2 :1276589-1278659 | MR150 | M36C05 | OK     | 55.6993 | 43.7876 | -0.347137  | 0.425091  | 0.67077 | 0.999883  |
| gene1249 | gene1249 | gid       | gi 57650036 ref NC_002951.2 :1278814-1280122 | MR150 | M36C05 | OK     | 74.2261 | 45.7677 | -0.697596  | 0.889806  | 0.37357 | 0.999883  |
| gene125  | gene125  | SACOL0129 | gi 57650036 ref NC_002951.2 :144205-145750   | MR150 | M36C05 | OK     | 1.13874 | 2.0488  | 0.847336   | -1.12744  | 0.25956 | 0.938894  |
| gene1250 | gene1250 | xerC      | gi 57650036 ref NC_002951.2 :1280538-1281977 | MR150 | M36C05 | OK     | 76.6704 | 90.5114 | 0.239431   | -0.252939 | 0.80032 | 0.999883  |
| gene1251 | gene1251 | hslV      | gi 57650036 ref NC_002951.2 :1280538-1281977 | MR150 | M36C05 | OK     | 67.6671 | 62.2284 | -0.120882  | 0.079205  | 0.93687 | 0.999883  |
| gene1252 | gene1252 | hslU      | gi 57650036 ref NC_002951.2 :1282042-1283446 | MR150 | M36C05 | OK     | 102.019 | 67.2023 | -0.602258  | 0.730523  | 0.46507 | 0.999883  |
| gene1253 | gene1253 | codY      | gi 57650036 ref NC_002951.2 :1283470-1284244 | MR150 | M36C05 | OK     | 138.7   | 78.9924 | -0.812181  | 1.0435    | 0.29672 | 0.9791    |
| gene1254 | gene1254 | rpsB      | gi 57650036 ref NC_002951.2 :1284585-1285350 | MR150 | M36C05 | OK     | 279.106 | 59.3596 | -2.23326   | 2.78187   | 0.0054  | 0.113604  |
| gene1255 | gene1255 | SACOL1275 | gi 57650036 ref NC_002951.2 :1285395-1285509 | MR150 | M36C05 | NOTEST | 0       | 0       | 0          | 0         | 1       | 1         |
| gene1256 | gene1256 | tsf       | gi 57650036 ref NC_002951.2 :1285543-1286425 | MR150 | M36C05 | OK     | 509.425 | 432.281 | -0.236897  | 0.253929  | 0.79955 | 0.999883  |
| gene1257 | gene1257 | pyrH      | gi 57650036 ref NC_002951.2 :1286561-1287284 | MR150 | M36C05 | OK     | 72.8877 | 37.9743 | -0.940653  | 1.30803   | 0.19086 | 0.851584  |
| gene1258 | gene1258 | frr       | gi 57650036 ref NC_002951.2 :1287302-1287857 | MR150 | M36C05 | OK     | 89.6641 | 49.4522 | -0.858496  | 1.20971   | 0.22639 | 0.897207  |
| gene1259 | gene1259 | uppS      | gi 57650036 ref NC_002951.2 :1288229-1289000 | MR150 | M36C05 | OK     | 34.857  | 19.7071 | -0.822734  | 1.19344   | 0.2327  | 0.902162  |
| gene126  | gene126  | SACOL0130 | gi 57650036 ref NC_002951.2 :145800-147336   | MR150 | M36C05 | OK     | 8.48345 | 10.6431 | 0.327191   | -0.478439 | 0.63234 | 0.999883  |



|          |          |           |                                              |       |        |        |         |         |            |           |         |           |
|----------|----------|-----------|----------------------------------------------|-------|--------|--------|---------|---------|------------|-----------|---------|-----------|
| gene1260 | gene1260 | cdsA      | gi 57650036 ref NC_002951.2 :1289006-1289789 | MR150 | M36C05 | OK     | 62.5025 | 15.1379 | -2.04575   | 2.8847    | 0.00392 | 0.0922789 |
| gene1261 | gene1261 | SACOL1281 | gi 57650036 ref NC_002951.2 :1290025-1291312 | MR150 | M36C05 | OK     | 28.7422 | 33.2654 | 0.21085    | -0.288467 | 0.77299 | 0.999883  |
| gene1262 | gene1262 | proS      | gi 57650036 ref NC_002951.2 :1291331-1293035 | MR150 | M36C05 | OK     | 42.2631 | 43.3837 | 0.0377538  | -0.048267 | 0.9615  | 0.999883  |
| gene1263 | gene1263 | polC      | gi 57650036 ref NC_002951.2 :1293298-1297609 | MR150 | M36C05 | OK     | 26.5688 | 25.6216 | -0.0523765 | 0.062999  | 0.94977 | 0.999883  |
| gene1264 | gene1264 | SACOL1284 | gi 57650036 ref NC_002951.2 :1297898-1298366 | MR150 | M36C05 | OK     | 54.7613 | 25.5367 | -1.10058   | 1.60804   | 0.10783 | 0.653986  |
| gene1265 | gene1265 | nusA      | gi 57650036 ref NC_002951.2 :1298386-1299562 | MR150 | M36C05 | OK     | 83.1626 | 40.102  | -1.05226   | 1.35979   | 0.1739  | 0.821477  |
| gene1266 | gene1266 | SACOL1286 | gi 57650036 ref NC_002951.2 :1299582-1300181 | MR150 | M36C05 | OK     | 49.6961 | 20.7581 | -1.25946   | 0.933623  | 0.3505  | 0.999883  |
| gene1267 | gene1267 | SACOL1287 | gi 57650036 ref NC_002951.2 :1299582-1300181 | MR150 | M36C05 | OK     | 98.6395 | 50.7483 | -0.958805  | 1.20199   | 0.22937 | 0.898537  |
| gene1268 | gene1268 | infB      | gi 57650036 ref NC_002951.2 :1300185-1302303 | MR150 | M36C05 | OK     | 138.32  | 77.1086 | -0.843043  | 0.947307  | 0.34348 | 0.999883  |
| gene1269 | gene1269 | rbfA      | gi 57650036 ref NC_002951.2 :1302688-1303039 | MR150 | M36C05 | OK     | 104.127 | 30.0891 | -1.79104   | 2.5922    | 0.00954 | 0.161634  |
| gene127  | gene127  | SACOL0132 | gi 57650036 ref NC_002951.2 :147862-148756   | MR150 | M36C05 | NOTEST | 0       | 0       | 0          | 0         | 1       | 1         |
| gene1270 | gene1270 | truB      | gi 57650036 ref NC_002951.2 :1303207-1304125 | MR150 | M36C05 | OK     | 11.5163 | 39.7832 | 1.78849    | -2.55629  | 0.01058 | 0.173222  |
| gene1271 | gene1271 | ribF      | gi 57650036 ref NC_002951.2 :1304139-1305111 | MR150 | M36C05 | OK     | 60.4979 | 93.5647 | 0.62908    | -0.812093 | 0.41674 | 0.999883  |
| gene1272 | gene1272 | rpsO      | gi 57650036 ref NC_002951.2 :1305225-1305495 | MR150 | M36C05 | OK     | 1739.44 | 625.953 | -1.4745    | 1.81136   | 0.07009 | 0.522414  |
| gene1273 | gene1273 | pnp       | gi 57650036 ref NC_002951.2 :1305864-1307961 | MR150 | M36C05 | OK     | 100.285 | 117.699 | 0.230991   | -0.258497 | 0.79602 | 0.999883  |
| gene1274 | gene1274 | SACOL1294 | gi 57650036 ref NC_002951.2 :1308298-1309870 | MR150 | M36C05 | OK     | 190.559 | 171.924 | -0.14847   | 0.163096  | 0.87044 | 0.999883  |
| gene1275 | gene1275 | SACOL1295 | gi 57650036 ref NC_002951.2 :1310116-1312495 | MR150 | M36C05 | OK     | 25.6585 | 33.9345 | 0.403316   | -0.515373 | 0.60629 | 0.999883  |
| gene1276 | gene1276 | SACOL1296 | gi 57650036 ref NC_002951.2 :1312499-1313213 | MR150 | M36C05 | OK     | 12.5094 | 11.8068 | -0.0834019 | 0.122002  | 0.9029  | 0.999883  |
| gene1277 | gene1277 | SACOL1297 | gi 57650036 ref NC_002951.2 :1313243-1316499 | MR150 | M36C05 | OK     | 9.91307 | 5.79143 | -0.775414  | 0.698054  | 0.48514 | 0.999883  |
| gene1278 | gene1278 | SACOL1298 | gi 57650036 ref NC_002951.2 :1313243-1316499 | MR150 | M36C05 | OK     | 11.2715 | 5.07094 | -1.15235   | 1.05227   | 0.29268 | 0.976946  |
| gene1279 | gene1279 | SACOL1299 | gi 57650036 ref NC_002951.2 :1313243-1316499 | MR150 | M36C05 | OK     | 12.1259 | 4.15151 | -1.54638   | 0.928721  | 0.35303 | 0.999883  |
| gene128  | gene128  | SACOL0134 | gi 57650036 ref NC_002951.2 :149516-150001   | MR150 | M36C05 | OK     | 0.5366  | 3.48667 | 2.69992    | -2.05792  | 0.0396  | 0.387684  |
| gene1280 | gene1280 | SACOL1300 | gi 57650036 ref NC_002951.2 :1316603-1317431 | MR150 | M36C05 | OK     | 63.1465 | 80.7974 | 0.355606   | -0.472187 | 0.63679 | 0.999883  |
| gene1281 | gene1281 | SACOL1301 | gi 57650036 ref NC_002951.2 :1317449-1317842 | MR150 | M36C05 | OK     | 48.0205 | 65.3893 | 0.445403   | -0.653272 | 0.51358 | 0.999883  |
| gene1282 | gene1282 | pgsA      | gi 57650036 ref NC_002951.2 :1317875-1318454 | MR150 | M36C05 | OK     | 133.665 | 126.714 | -0.0770469 | 0.101344  | 0.91928 | 0.999883  |
| gene1283 | gene1283 | SACOL1303 | gi 57650036 ref NC_002951.2 :1318680-1319832 | MR150 | M36C05 | OK     | 47.1334 | 52.9268 | 0.16725    | -0.220775 | 0.82527 | 0.999883  |
| gene1284 | gene1284 | recA      | gi 57650036 ref NC_002951.2 :1319996-1321040 | MR150 | M36C05 | OK     | 514.564 | 453.742 | -0.181478  | 0.190504  | 0.84891 | 0.999883  |
| gene1285 | gene1285 | SACOL1305 | gi 57650036 ref NC_002951.2 :1321393-1322953 | MR150 | M36C05 | OK     | 409.482 | 921.673 | 1.17046    | -1.20297  | 0.22899 | 0.898537  |
| gene1286 | gene1286 | SACOL1306 | gi 57650036 ref NC_002951.2 :1323249-1323465 | MR150 | M36C05 | OK     | 3263.38 | 2553.32 | -0.353993  | 0.419909  | 0.67455 | 0.999883  |
| gene1287 | gene1287 | SACOL1307 | gi 57650036 ref NC_002951.2 :1323638-1324436 | MR150 | M36C05 | OK     | 95.5    | 32.4669 | -1.55653   | 2.11807   | 0.03417 | 0.353769  |
| gene1288 | gene1288 | SACOL1308 | gi 57650036 ref NC_002951.2 :1324575-1326336 | MR150 | M36C05 | OK     | 40.8184 | 26.689  | -0.612973  | 0.801697  | 0.42273 | 0.999883  |
| gene1289 | gene1289 | SACOL1309 | gi 57650036 ref NC_002951.2 :1326336-1327203 | MR150 | M36C05 | OK     | 66.1136 | 43.4905 | -0.604248  | 0.820946  | 0.41168 | 0.999883  |
| gene129  | gene129  | SACOL0135 | gi 57650036 ref NC_002951.2 :150450-153060   | MR150 | M36C05 | OK     | 0.9534  | 2.14902 | 1.17252    | -1.6447   | 0.10003 | 0.638047  |

|          |          |           |                                              |       |        |        |         |         |             |             |          |           |
|----------|----------|-----------|----------------------------------------------|-------|--------|--------|---------|---------|-------------|-------------|----------|-----------|
| gene1290 | gene1290 | SACOL1310 | gi 57650036 ref NC_002951.2 :1327296-1327590 | MR150 | M36C05 | OK     | 1.48471 | 3.20763 | 1.11132     | -0.786253   | 0.43172  | 0.999883  |
| gene1291 | gene1291 | miaB      | gi 57650036 ref NC_002951.2 :1327723-1329268 | MR150 | M36C05 | OK     | 38.1479 | 26.7983 | -0.509462   | 0.679386    | 0.49689  | 0.999883  |
| gene1292 | gene1292 | SACOL1313 | gi 57650036 ref NC_002951.2 :1329268-1329634 | MR150 | M36C05 | OK     | 69.9458 | 44.6205 | -0.64853    | 0.951569    | 0.34132  | 0.999883  |
| gene1293 | gene1293 | SACOL1314 | gi 57650036 ref NC_002951.2 :1329660-1330152 | MR150 | M36C05 | OK     | 65.4749 | 25.7137 | -1.34841    | 1.95954     | 0.05005  | 0.440105  |
| gene1294 | gene1294 | hexA      | gi 57650036 ref NC_002951.2 :1330454-1333073 | MR150 | M36C05 | OK     | 15.1977 | 10.7962 | -0.493329   | 0.680192    | 0.49638  | 0.999883  |
| gene1295 | gene1295 | mutL      | gi 57650036 ref NC_002951.2 :1333085-1335095 | MR150 | M36C05 | OK     | 21.0717 | 7.00213 | -1.58944    | 2.23018     | 0.02574  | 0.304771  |
| gene1296 | gene1296 | glpP      | gi 57650036 ref NC_002951.2 :1335100-1335643 | MR150 | M36C05 | OK     | 16.5068 | 4.82871 | -1.77335    | 2.43038     | 0.01508  | 0.214453  |
| gene1297 | gene1297 | glpF      | gi 57650036 ref NC_002951.2 :1336107-1336926 | MR150 | M36C05 | OK     | 151.626 | 114.942 | -0.399622   | 0.496584    | 0.61948  | 0.999883  |
| gene1298 | gene1298 | glpK      | gi 57650036 ref NC_002951.2 :1337054-1338551 | MR150 | M36C05 | OK     | 28.4591 | 18.3572 | -0.632544   | 0.875445    | 0.38133  | 0.999883  |
| gene1299 | gene1299 | glpD      | gi 57650036 ref NC_002951.2 :1338708-1340382 | MR150 | M36C05 | OK     | 91.7534 | 162.637 | 0.825822    | -0.937232   | 0.34864  | 0.999883  |
| gene13   | gene13   | SACOL0014 | gi 57650036 ref NC_002951.2 :18344-20755     | MR150 | M36C05 | OK     | 112.713 | 83.2798 | -0.43661    | 0.452465    | 0.65093  | 0.999883  |
| gene130  | gene130  | cap5A     | gi 57650036 ref NC_002951.2 :153404-154073   | MR150 | M36C05 | OK     | 2.61118 | 262.128 | 6.64942     | -8.02718    | 8.88E-16 | 6.43E-12  |
| gene1300 | gene1300 | SACOL1322 | gi 57650036 ref NC_002951.2 :1340531-1341446 | MR150 | M36C05 | OK     | 11.3504 | 10.7974 | -0.0720589  | 0.105912    | 0.91565  | 0.999883  |
| gene1301 | gene1301 | miaA      | gi 57650036 ref NC_002951.2 :1341463-1342399 | MR150 | M36C05 | OK     | 19.3487 | 13.7855 | -0.48909    | 0.71576     | 0.47414  | 0.999883  |
| gene1302 | gene1302 | SACOL1324 | gi 57650036 ref NC_002951.2 :1342413-1342647 | MR150 | M36C05 | OK     | 44.717  | 20.0017 | -1.1607     | 1.48559     | 0.13739  | 0.733066  |
| gene1303 | gene1303 | gpxA1     | gi 57650036 ref NC_002951.2 :1342868-1343345 | MR150 | M36C05 | OK     | 126.963 | 136.705 | 0.106659    | -0.14467    | 0.88497  | 0.999883  |
| gene1304 | gene1304 | SACOL1326 | gi 57650036 ref NC_002951.2 :1343456-1344695 | MR150 | M36C05 | OK     | 15.6244 | 7.21535 | -1.11466    | 1.62664     | 0.10381  | 0.645527  |
| gene1305 | gene1305 | SACOL1327 | gi 57650036 ref NC_002951.2 :1344713-1345952 | MR150 | M36C05 | OK     | 23.8788 | 5.72983 | -2.05916    | 2.95419     | 0.00313  | 0.0801678 |
| gene1306 | gene1306 | glnR      | gi 57650036 ref NC_002951.2 :1346194-1346563 | MR150 | M36C05 | OK     | 242.071 | 169.053 | -0.517952   | 0.706116    | 0.48012  | 0.999883  |
| gene1307 | gene1307 | femC      | gi 57650036 ref NC_002951.2 :1346581-1347922 | MR150 | M36C05 | OK     | 207.515 | 226.176 | 0.12423     | -0.136532   | 0.8914   | 0.999883  |
| gene1308 | gene1308 | SACOL1331 | gi 57650036 ref NC_002951.2 :1348414-1348612 | MR150 | M36C05 | OK     | 5.22482 | 3.72726 | -0.487267   | 0.269967    | 0.78719  | 0.999883  |
| gene1309 | gene1309 | SACOL1332 | gi 57650036 ref NC_002951.2 :1349300-1349525 | MR150 | M36C05 | NOTEST | 0       | 0       | 0           | 0           | 1        | 1         |
| gene131  | gene131  | cap5B     | gi 57650036 ref NC_002951.2 :154088-154775   | MR150 | M36C05 | OK     | 0.94303 | 124.852 | 7.04869     | -7.76014    | 8.44E-15 | 2.09E-11  |
| gene1310 | gene1310 | SACOL1333 | gi 57650036 ref NC_002951.2 :1349818-1350025 | MR150 | M36C05 | OK     | 4.33328 | 3.09463 | -0.485691   | 0.269094    | 0.78786  | 0.999883  |
| gene1311 | gene1311 | SACOL1334 | gi 57650036 ref NC_002951.2 :1350725-1350836 | MR150 | M36C05 | NOTEST | 0       | 0       | 0           | 0           | 1        | 1         |
| gene1312 | gene1312 | SACOL1335 | gi 57650036 ref NC_002951.2 :1351263-1351449 | MR150 | M36C05 | NOTEST | 0       | 0       | 0           | 0           | 1        | 1         |
| gene1313 | gene1313 | SACOL1336 | gi 57650036 ref NC_002951.2 :1351960-1352065 | MR150 | M36C05 | NOTEST | 0       | 0       | 0           | 0           | 1        | 1         |
| gene1314 | gene1314 | SACOL1337 | gi 57650036 ref NC_002951.2 :1352097-1352193 | MR150 | M36C05 | NOTEST | 0       | 0       | 0           | 0           | 1        | 1         |
| gene1315 | gene1315 | SACOL1338 | gi 57650036 ref NC_002951.2 :1352193-1352445 | MR150 | M36C05 | OK     | 4.45979 | 1.59871 | -1.48007    | 0.922094    | 0.35648  | 0.999883  |
| gene1316 | gene1316 | SACOL1339 | gi 57650036 ref NC_002951.2 :1352649-1353075 | MR150 | M36C05 | OK     | 4.05069 | 3.90069 | -0.0544378  | 0.062936    | 0.94982  | 0.999883  |
| gene1317 | gene1317 | SACOL1340 | gi 57650036 ref NC_002951.2 :1353195-1353444 | MR150 | M36C05 | OK     | 23.09   | 18.2046 | -0.342965   | 0.430309    | 0.66697  | 0.999883  |
| gene1318 | gene1318 | SACOL1341 | gi 57650036 ref NC_002951.2 :1353573-1353675 | MR150 | M36C05 | NOTEST | 0       | 0       | 0           | 0           | 1        | 1         |
| gene1319 | gene1319 | SACOL1342 | gi 57650036 ref NC_002951.2 :1353720-1353987 | MR150 | M36C05 | OK     | 0       | 1.36301 | 1.79769e+30 | 1.79769e+30 | 0.14732  | 0.743774  |

|          |          |           |                                              |       |        |        |         |         |             |             |          |           |
|----------|----------|-----------|----------------------------------------------|-------|--------|--------|---------|---------|-------------|-------------|----------|-----------|
| gene132  | gene132  | cap5C     | gi 57650036 ref NC_002951.2 :154777-155542   | MR150 | M36C05 | OK     | 1.08391 | 95.2877 | 6.45798     | -7.49227    | 6.77E-14 | 7.00E-11  |
| gene1320 | gene1320 | SACOL1344 | gi 57650036 ref NC_002951.2 :1354323-1354458 | MR150 | M36C05 | NOTEST | 0       | 0       | 0           | 0           | 1        | 1         |
| gene1321 | gene1321 | SACOL1345 | gi 57650036 ref NC_002951.2 :1354548-1354839 | MR150 | M36C05 | OK     | 13.7019 | 5.47979 | -1.32219    | 1.48771     | 0.13683  | 0.732537  |
| gene1322 | gene1322 | SACOL1346 | gi 57650036 ref NC_002951.2 :1354849-1355044 | MR150 | M36C05 | OK     | 27.9654 | 11.9653 | -1.22479    | 1.2023      | 0.22925  | 0.898537  |
| gene1323 | gene1323 | SACOL1347 | gi 57650036 ref NC_002951.2 :1355093-1355435 | MR150 | M36C05 | OK     | 3.14579 | 18.181  | 2.53094     | -2.85511    | 0.0043   | 0.0972982 |
| gene1324 | gene1324 | SACOL1348 | gi 57650036 ref NC_002951.2 :1355441-1355633 | MR150 | M36C05 | OK     | 0       | 4.28023 | 1.79769e+30 | 1.79769e+30 | 0.14732  | 0.743774  |
| gene1325 | gene1325 | SACOL1349 | gi 57650036 ref NC_002951.2 :1356181-1357207 | MR150 | M36C05 | OK     | 1.48314 | 3.87146 | 1.38422     | -1.81389    | 0.0697   | 0.522414  |
| gene1326 | gene1326 | SACOL1350 | gi 57650036 ref NC_002951.2 :1357476-1357674 | MR150 | M36C05 | OK     | 83.5971 | 26.0908 | -1.67991    | 2.05475     | 0.0399   | 0.389112  |
| gene1327 | gene1327 | cls1      | gi 57650036 ref NC_002951.2 :1357731-1359213 | MR150 | M36C05 | OK     | 33.5707 | 20.1198 | -0.738588   | 1.01021     | 0.3124   | 0.994118  |
| gene1328 | gene1328 | SACOL1352 | gi 57650036 ref NC_002951.2 :1359387-1360996 | MR150 | M36C05 | OK     | 3.23954 | 6.06666 | 0.905111    | -0.942248   | 0.34607  | 0.999883  |
| gene1329 | gene1329 | SACOL1353 | gi 57650036 ref NC_002951.2 :1359387-1360996 | MR150 | M36C05 | OK     | 4.3166  | 7.25877 | 0.749831    | -0.75982    | 0.44736  | 0.999883  |
| gene133  | gene133  | cap5D     | gi 57650036 ref NC_002951.2 :155561-158403   | MR150 | M36C05 | OK     | 1.60336 | 85.9854 | 5.74492     | -6.08734    | 1.15E-09 | 3.96E-07  |
| gene1330 | gene1330 | SACOL1354 | gi 57650036 ref NC_002951.2 :1360999-1362690 | MR150 | M36C05 | OK     | 10.1292 | 12.4847 | 0.301651    | -0.30373    | 0.76133  | 0.999883  |
| gene1331 | gene1331 | SACOL1355 | gi 57650036 ref NC_002951.2 :1360999-1362690 | MR150 | M36C05 | OK     | 28.8649 | 21.0917 | -0.452637   | 0.453855    | 0.64993  | 0.999883  |
| gene1332 | gene1332 | SACOL1356 | gi 57650036 ref NC_002951.2 :1362962-1363070 | MR150 | M36C05 | NOTEST | 0       | 0       | 0           | 0           | 1        | 1         |
| gene1333 | gene1333 | SACOL1357 | gi 57650036 ref NC_002951.2 :1363129-1363663 | MR150 | M36C05 | OK     | 14.66   | 5.62014 | -1.3832     | 1.90977     | 0.05616  | 0.471519  |
| gene1334 | gene1334 | SACOL1358 | gi 57650036 ref NC_002951.2 :1363805-1364660 | MR150 | M36C05 | OK     | 55.6359 | 113.331 | 1.02645     | -1.33879    | 0.18064  | 0.828449  |
| gene1335 | gene1335 | SACOL1359 | gi 57650036 ref NC_002951.2 :1364975-1365566 | MR150 | M36C05 | OK     | 229.386 | 97.9724 | -1.22733    | 1.57731     | 0.11472  | 0.670749  |
| gene1336 | gene1336 | SACOL1360 | gi 57650036 ref NC_002951.2 :1365619-1367002 | MR150 | M36C05 | OK     | 48.5488 | 85.8213 | 0.821901    | -1.02798    | 0.30396  | 0.988652  |
| gene1337 | gene1337 | SACOL1361 | gi 57650036 ref NC_002951.2 :1367007-1367115 | MR150 | M36C05 | NOTEST | 0       | 0       | 0           | 0           | 1        | 1         |
| gene1338 | gene1338 | hom       | gi 57650036 ref NC_002951.2 :1367192-1368473 | MR150 | M36C05 | OK     | 238.864 | 541.831 | 1.18165     | -1.25248    | 0.2104   | 0.88887   |
| gene1339 | gene1339 | thrC      | gi 57650036 ref NC_002951.2 :1368478-1369540 | MR150 | M36C05 | OK     | 339.673 | 717.106 | 1.07804     | -1.13504    | 0.25636  | 0.933885  |
| gene134  | gene134  | cap5E     | gi 57650036 ref NC_002951.2 :155561-158403   | MR150 | M36C05 | OK     | 1.47777 | 57.9945 | 5.29442     | -3.48321    | 0.0005   | 0.0200306 |
| gene1340 | gene1340 | thrB      | gi 57650036 ref NC_002951.2 :1369541-1370456 | MR150 | M36C05 | OK     | 207.091 | 359.245 | 0.794701    | -0.894433   | 0.37109  | 0.999883  |
| gene1341 | gene1341 | SACOL1365 | gi 57650036 ref NC_002951.2 :1370513-1371317 | MR150 | M36C05 | OK     | 333.847 | 537.862 | 0.68805     | -0.753497   | 0.45115  | 0.999883  |
| gene1342 | gene1342 | SACOL1366 | gi 57650036 ref NC_002951.2 :1371609-1371924 | MR150 | M36C05 | OK     | 138.616 | 106.44  | -0.381055   | 0.554372    | 0.57932  | 0.999883  |
| gene1343 | gene1343 | SACOL1367 | gi 57650036 ref NC_002951.2 :1372141-1373596 | MR150 | M36C05 | OK     | 38.5641 | 83.9684 | 1.12259     | -1.41206    | 0.15793  | 0.776469  |
| gene1344 | gene1344 | kataA     | gi 57650036 ref NC_002951.2 :1373895-1375317 | MR150 | M36C05 | OK     | 537.176 | 2052.29 | 1.93377     | -2.01756    | 0.04364  | 0.40838   |
| gene1345 | gene1345 | rpmG      | gi 57650036 ref NC_002951.2 :1375407-1375557 | MR150 | M36C05 | OK     | 694.511 | 785.21  | 0.177081    | -0.254689   | 0.79896  | 0.999883  |
| gene1346 | gene1346 | rpsN      | gi 57650036 ref NC_002951.2 :1376010-1376280 | MR150 | M36C05 | OK     | 16.5837 | 26.4674 | 0.674453    | -0.878311   | 0.37978  | 0.999883  |
| gene1347 | gene1347 | guaC      | gi 57650036 ref NC_002951.2 :1376436-1377515 | MR150 | M36C05 | OK     | 6.69204 | 3.96883 | -0.753732   | 1.06768     | 0.28566  | 0.973566  |
| gene1348 | gene1348 | SACOL1372 | gi 57650036 ref NC_002951.2 :1376436-1377515 | MR150 | M36C05 | NOTEST | 0       | 0       | 0           | 0           | 1        | 1         |
| gene1349 | gene1349 | SACOL1373 | gi 57650036 ref NC_002951.2 :1377588-1378452 | MR150 | M36C05 | OK     | 17.9866 | 13.7872 | -0.383592   | 0.563058    | 0.5734   | 0.999883  |

|          |          |           |                                              |       |        |        |         |         |           |           |          |           |
|----------|----------|-----------|----------------------------------------------|-------|--------|--------|---------|---------|-----------|-----------|----------|-----------|
| gene135  | gene135  | cap5F     | gi 57650036 ref NC_002951.2 :158415-159525   | MR150 | M36C05 | OK     | 1.51458 | 47.6174 | 4.9745    | -6.43694  | 1.22E-10 | 5.19E-08  |
| gene1350 | gene1350 | lexA      | gi 57650036 ref NC_002951.2 :1378831-1379455 | MR150 | M36C05 | OK     | 657.396 | 762.497 | 0.213968  | -0.230774 | 0.81749  | 0.999883  |
| gene1351 | gene1351 | SACOL1375 | gi 57650036 ref NC_002951.2 :1379597-1379831 | MR150 | M36C05 | OK     | 363.326 | 104.009 | -1.80456  | 2.61015   | 0.00905  | 0.157446  |
| gene1352 | gene1352 | SACOL1376 | gi 57650036 ref NC_002951.2 :1379966-1380206 | MR150 | M36C05 | OK     | 77.4024 | 31.4104 | -1.30114  | 1.79363   | 0.07287  | 0.528958  |
| gene1353 | gene1353 | tkt       | gi 57650036 ref NC_002951.2 :1380326-1382315 | MR150 | M36C05 | OK     | 244.527 | 354.772 | 0.536901  | -0.555687 | 0.57843  | 0.999883  |
| gene1354 | gene1354 | SACOL1378 | gi 57650036 ref NC_002951.2 :1382592-1382920 | MR150 | M36C05 | OK     | 484.291 | 80.0577 | -2.59676  | 3.67522   | 0.00024  | 0.0111637 |
| gene1355 | gene1355 | SACOL1379 | gi 57650036 ref NC_002951.2 :1382592-1382920 | MR150 | M36C05 | NOTEST | 0       | 0       | 0         | 0         | 1        | 1         |
| gene1356 | gene1356 | SACOL1380 | gi 57650036 ref NC_002951.2 :1383013-1383481 | MR150 | M36C05 | OK     | 44.4936 | 12.3565 | -1.84833  | 2.65568   | 0.00791  | 0.14471   |
| gene1357 | gene1357 | sbcD      | gi 57650036 ref NC_002951.2 :1383604-1384726 | MR150 | M36C05 | OK     | 8.96923 | 3.34839 | -1.42152  | 2.03924   | 0.04143  | 0.396038  |
| gene1358 | gene1358 | sbcC      | gi 57650036 ref NC_002951.2 :1384729-1387759 | MR150 | M36C05 | OK     | 10.9881 | 3.73784 | -1.55566  | 2.21201   | 0.02697  | 0.309278  |
| gene1359 | gene1359 | mscL      | gi 57650036 ref NC_002951.2 :1387829-1388192 | MR150 | M36C05 | OK     | 671.75  | 1270.2  | 0.919061  | -1.06168  | 0.28838  | 0.975616  |
| gene136  | gene136  | cap5G     | gi 57650036 ref NC_002951.2 :159528-160653   | MR150 | M36C05 | OK     | 2.15226 | 38.3815 | 4.15649   | -5.59662  | 2.19E-08 | 4.52E-06  |
| gene1360 | gene1360 | opuD1     | gi 57650036 ref NC_002951.2 :1388395-1390042 | MR150 | M36C05 | OK     | 232.869 | 23.7656 | -3.29257  | 3.91358   | 9.09E-05 | 0.0052649 |
| gene1361 | gene1361 | acnA      | gi 57650036 ref NC_002951.2 :1390933-1393639 | MR150 | M36C05 | OK     | 283.073 | 752.31  | 1.41015   | -1.45697  | 0.14513  | 0.743774  |
| gene1362 | gene1362 | SACOL1386 | gi 57650036 ref NC_002951.2 :1393818-1394286 | MR150 | M36C05 | OK     | 77.0081 | 89.7903 | 0.22155   | -0.315149 | 0.75265  | 0.999883  |
| gene1363 | gene1363 | SACOL1387 | gi 57650036 ref NC_002951.2 :1394492-1394789 | MR150 | M36C05 | OK     | 59.3894 | 174.279 | 1.55312   | -2.25528  | 0.02412  | 0.294807  |
| gene1364 | gene1364 | SACOL1388 | gi 57650036 ref NC_002951.2 :1395164-1395773 | MR150 | M36C05 | OK     | 194.228 | 138.185 | -0.49115  | 0.624506  | 0.5323   | 0.999883  |
| gene1365 | gene1365 | parE      | gi 57650036 ref NC_002951.2 :1395972-1400372 | MR150 | M36C05 | OK     | 49.3251 | 34.2024 | -0.528224 | 0.411498  | 0.68071  | 0.999883  |
| gene1366 | gene1366 | parC      | gi 57650036 ref NC_002951.2 :1395972-1400372 | MR150 | M36C05 | OK     | 56.9463 | 25.5111 | -1.15848  | 0.969871  | 0.33211  | 0.999883  |
| gene1367 | gene1367 | SACOL1392 | gi 57650036 ref NC_002951.2 :1400621-1402097 | MR150 | M36C05 | OK     | 75.3791 | 21.7694 | -1.79186  | 2.326     | 0.02002  | 0.260836  |
| gene1368 | gene1368 | SACOL1393 | gi 57650036 ref NC_002951.2 :1402581-1404776 | MR150 | M36C05 | OK     | 28.1807 | 41.1089 | 0.544742  | -0.236505 | 0.81304  | 0.999883  |
| gene1369 | gene1369 | SACOL1394 | gi 57650036 ref NC_002951.2 :1402581-1404776 | MR150 | M36C05 | OK     | 108.032 | 143.672 | 0.411325  | -0.047833 | 0.96185  | 0.999883  |
| gene137  | gene137  | cap5H     | gi 57650036 ref NC_002951.2 :160655-161282   | MR150 | M36C05 | NOTEST | 0       | 0       | 0         | 0         | 1        | 1         |
| gene1370 | gene1370 | SACOL1395 | gi 57650036 ref NC_002951.2 :1402581-1404776 | MR150 | M36C05 | OK     | 84.9972 | 190.013 | 1.16061   | -1.23115  | 0.21827  | 0.89416   |
| gene1371 | gene1371 | fmtC      | gi 57650036 ref NC_002951.2 :1405256-1407779 | MR150 | M36C05 | OK     | 262.31  | 344.676 | 0.393967  | -0.403562 | 0.68654  | 0.999883  |
| gene1372 | gene1372 | msrA      | gi 57650036 ref NC_002951.2 :1407981-1408491 | MR150 | M36C05 | OK     | 24.1811 | 63.4037 | 1.39069   | -2.01952  | 0.04343  | 0.40838   |
| gene1373 | gene1373 | SACOL1398 | gi 57650036 ref NC_002951.2 :1408627-1409611 | MR150 | M36C05 | OK     | 22.0711 | 16.457  | -0.423456 | 0.615666  | 0.53812  | 0.999883  |
| gene1374 | gene1374 | dmpI      | gi 57650036 ref NC_002951.2 :1409698-1409884 | MR150 | M36C05 | OK     | 314.174 | 104.259 | -1.5914   | 2.24332   | 0.02488  | 0.299551  |
| gene1375 | gene1375 | SACOL1400 | gi 57650036 ref NC_002951.2 :1410031-1411294 | MR150 | M36C05 | OK     | 80.825  | 68.6563 | -0.235409 | 0.293704  | 0.76898  | 0.999883  |
| gene1376 | gene1376 | tyrA      | gi 57650036 ref NC_002951.2 :1411430-1412522 | MR150 | M36C05 | OK     | 68.844  | 59.0862 | -0.220509 | 0.285747  | 0.77507  | 0.999883  |
| gene1377 | gene1377 | SACOL1402 | gi 57650036 ref NC_002951.2 :1412686-1413718 | MR150 | M36C05 | OK     | 66.2601 | 55.1345 | -0.265186 | 0.34804   | 0.72781  | 0.999883  |
| gene1378 | gene1378 | trpE      | gi 57650036 ref NC_002951.2 :1414209-1416179 | MR150 | M36C05 | OK     | 0.76134 | 2.83118 | 1.89479   | -2.20728  | 0.02729  | 0.312057  |
| gene1379 | gene1379 | trpG      | gi 57650036 ref NC_002951.2 :1414209-1416179 | MR150 | M36C05 | OK     | 0.83401 | 1.80502 | 1.11387   | -0.657285 | 0.511    | 0.999883  |

|          |          |           |                                              |       |        |        |         |         |            |           |         |          |
|----------|----------|-----------|----------------------------------------------|-------|--------|--------|---------|---------|------------|-----------|---------|----------|
| gene138  | gene138  | cap5I     | gi 57650036 ref NC_002951.2 :161286-162396   | MR150 | M36C05 | NOTEST | 0       | 0       | 0          | 0         | 1       | 1        |
| gene1380 | gene1380 | trpD      | gi 57650036 ref NC_002951.2 :1416184-1417183 | MR150 | M36C05 | OK     | 1.14992 | 2.76029 | 1.26328    | -1.57334  | 0.11564 | 0.672201 |
| gene1381 | gene1381 | trpC      | gi 57650036 ref NC_002951.2 :1417184-1420527 | MR150 | M36C05 | OK     | 0.52523 | 3.59526 | 2.77507    | -1.37097  | 0.17039 | 0.813911 |
| gene1382 | gene1382 | trpF      | gi 57650036 ref NC_002951.2 :1417184-1420527 | MR150 | M36C05 | OK     | 1.75541 | 2.53148 | 0.528177   | -0.299384 | 0.76465 | 0.999883 |
| gene1383 | gene1383 | trpB      | gi 57650036 ref NC_002951.2 :1417184-1420527 | MR150 | M36C05 | OK     | 1.05619 | 2.93272 | 1.47337    | -1.17272  | 0.24091 | 0.911371 |
| gene1384 | gene1384 | trpA      | gi 57650036 ref NC_002951.2 :1417184-1420527 | MR150 | M36C05 | OK     | 3.18344 | 5.00572 | 0.652988   | -0.565536 | 0.57171 | 0.999883 |
| gene1385 | gene1385 | femA      | gi 57650036 ref NC_002951.2 :1420809-1422111 | MR150 | M36C05 | OK     | 98.534  | 161.36  | 0.71159    | -0.830632 | 0.40618 | 0.999883 |
| gene1386 | gene1386 | SACOL1411 | gi 57650036 ref NC_002951.2 :1422129-1423389 | MR150 | M36C05 | OK     | 167.453 | 184.399 | 0.139077   | -0.157261 | 0.87504 | 0.999883 |
| gene1387 | gene1387 | SACOL1412 | gi 57650036 ref NC_002951.2 :1424071-1424839 | MR150 | M36C05 | OK     | 5.66047 | 3.30189 | -0.777629  | 1.05918   | 0.28952 | 0.975616 |
| gene1388 | gene1388 | SACOL1413 | gi 57650036 ref NC_002951.2 :1424886-1425360 | MR150 | M36C05 | OK     | 75.8909 | 162.37  | 1.09729    | -1.51076  | 0.13085 | 0.718382 |
| gene1389 | gene1389 | SACOL1414 | gi 57650036 ref NC_002951.2 :1425483-1428747 | MR150 | M36C05 | OK     | 7.01403 | 12.5291 | 0.836967   | -0.785893 | 0.43193 | 0.999883 |
| gene139  | gene139  | cap5J     | gi 57650036 ref NC_002951.2 :162409-164774   | MR150 | M36C05 | NOTEST | 0       | 0       | 0          | 0         | 1       | 1        |
| gene1390 | gene1390 | SACOL1415 | gi 57650036 ref NC_002951.2 :1425483-1428747 | MR150 | M36C05 | OK     | 2.13384 | 6.72684 | 1.65648    | -1.03052  | 0.30277 | 0.987655 |
| gene1391 | gene1391 | SACOL1416 | gi 57650036 ref NC_002951.2 :1425483-1428747 | MR150 | M36C05 | OK     | 2.4265  | 1.39848 | -0.795017  | 0.345877  | 0.72944 | 0.999883 |
| gene1392 | gene1392 | SACOL1417 | gi 57650036 ref NC_002951.2 :1425483-1428747 | MR150 | M36C05 | OK     | 3.30778 | 4.624   | 0.483281   | -0.366281 | 0.71416 | 0.999883 |
| gene1393 | gene1393 | SACOL1418 | gi 57650036 ref NC_002951.2 :1429050-1429395 | MR150 | M36C05 | OK     | 26.7537 | 22.3011 | -0.262621  | 0.372977  | 0.70917 | 0.999883 |
| gene1394 | gene1394 | SACOL1419 | gi 57650036 ref NC_002951.2 :1429599-1431414 | MR150 | M36C05 | OK     | 46.5669 | 103.731 | 1.15546    | -1.3814   | 0.16716 | 0.804863 |
| gene1395 | gene1395 | SACOL1420 | gi 57650036 ref NC_002951.2 :1431553-1432195 | MR150 | M36C05 | OK     | 6.92639 | 3.24617 | -1.09337   | 1.45282   | 0.14627 | 0.743774 |
| gene1396 | gene1396 | SACOL1421 | gi 57650036 ref NC_002951.2 :1432201-1433053 | MR150 | M36C05 | OK     | 5.16647 | 3.89097 | -0.40905   | 0.569576  | 0.56897 | 0.999883 |
| gene1397 | gene1397 | SACOL1422 | gi 57650036 ref NC_002951.2 :1433099-1434017 | MR150 | M36C05 | OK     | 4.47854 | 5.37611 | 0.263534   | -0.373392 | 0.70886 | 0.999883 |
| gene1398 | gene1398 | SACOL1423 | gi 57650036 ref NC_002951.2 :1434018-1434945 | MR150 | M36C05 | OK     | 3.58063 | 3.48908 | -0.0373636 | 0.051391  | 0.95901 | 0.999883 |
| gene1399 | gene1399 | SACOL1424 | gi 57650036 ref NC_002951.2 :1435135-1436119 | MR150 | M36C05 | OK     | 16.2115 | 14.0658 | -0.204825  | 0.300121  | 0.76409 | 0.999883 |
| gene14   | gene14   | rplI      | gi 57650036 ref NC_002951.2 :18344-20755     | MR150 | M36C05 | OK     | 93.3919 | 72.3559 | -0.368187  | 0.135129  | 0.89251 | 0.999883 |
| gene140  | gene140  | cap5K     | gi 57650036 ref NC_002951.2 :162409-164774   | MR150 | M36C05 | NOTEST | 0       | 0       | 0          | 0         | 1       | 1        |
| gene1400 | gene1400 | SACOL1425 | gi 57650036 ref NC_002951.2 :1436658-1436955 | MR150 | M36C05 | NOTEST | 0       | 0       | 0          | 0         | 1       | 1        |
| gene1401 | gene1401 | SACOL1426 | gi 57650036 ref NC_002951.2 :1437090-1437993 | MR150 | M36C05 | OK     | 180.348 | 112.957 | -0.675013  | 0.81807   | 0.41332 | 0.999883 |
| gene1402 | gene1402 | SACOL1427 | gi 57650036 ref NC_002951.2 :1438139-1439741 | MR150 | M36C05 | OK     | 28.2947 | 9.51279 | -1.57259   | 2.20008   | 0.0278  | 0.315942 |
| gene1403 | gene1403 | lysC      | gi 57650036 ref NC_002951.2 :1440600-1441806 | MR150 | M36C05 | OK     | 8.37282 | 10.192  | 0.283655   | -0.416932 | 0.67673 | 0.999883 |
| gene1404 | gene1404 | asd       | gi 57650036 ref NC_002951.2 :1441869-1442859 | MR150 | M36C05 | OK     | 36.6351 | 71.7486 | 0.969723   | -1.30012  | 0.19356 | 0.855702 |
| gene1405 | gene1405 | dapA      | gi 57650036 ref NC_002951.2 :1442860-1444467 | MR150 | M36C05 | OK     | 36.9446 | 81.1165 | 1.13463    | -1.12263  | 0.2616  | 0.942812 |
| gene1406 | gene1406 | dapB      | gi 57650036 ref NC_002951.2 :1442860-1444467 | MR150 | M36C05 | OK     | 40.6883 | 55.4846 | 0.447474   | -0.355778 | 0.72201 | 0.999883 |
| gene1407 | gene1407 | dapD      | gi 57650036 ref NC_002951.2 :1444493-1445213 | MR150 | M36C05 | OK     | 61.8259 | 106.73  | 0.787685   | -1.05202  | 0.29279 | 0.976946 |
| gene1408 | gene1408 | SACOL1433 | gi 57650036 ref NC_002951.2 :1445355-1446507 | MR150 | M36C05 | OK     | 29.2774 | 18.5302 | -0.65991   | 0.936342  | 0.3491  | 0.999883 |

|          |          |           |                                              |       |        |        |         |         |             |             |          |           |
|----------|----------|-----------|----------------------------------------------|-------|--------|--------|---------|---------|-------------|-------------|----------|-----------|
| gene1409 | gene1409 | SACOL1434 | gi 57650036 ref NC_002951.2 :1446511-1448852 | MR150 | M36C05 | OK     | 18.3213 | 12.9427 | -0.501384   | 0.31129     | 0.75558  | 0.999883  |
| gene141  | gene141  | cap5L     | gi 57650036 ref NC_002951.2 :164774-165980   | MR150 | M36C05 | OK     | 0.9134  | 11.6167 | 3.66881     | -4.72359    | 2.32E-06 | 0.0002266 |
| gene1410 | gene1410 | lysA      | gi 57650036 ref NC_002951.2 :1446511-1448852 | MR150 | M36C05 | OK     | 39.2213 | 44.0562 | 0.167708    | -0.188998   | 0.8501   | 0.999883  |
| gene1411 | gene1411 | SACOL1436 | gi 57650036 ref NC_002951.2 :1449091-1449493 | MR150 | M36C05 | NOTEST | 0       | 0       | 0           | 0           | 1        | 1         |
| gene1412 | gene1412 | SACOL1437 | gi 57650036 ref NC_002951.2 :1449689-1449890 | MR150 | M36C05 | OK     | 3847.5  | 1551.04 | -1.31069    | 1.63354     | 0.10236  | 0.641957  |
| gene1413 | gene1413 | SACOL1438 | gi 57650036 ref NC_002951.2 :1450060-1450369 | MR150 | M36C05 | OK     | 57.9846 | 88.432  | 0.6089      | -0.893609   | 0.37153  | 0.999883  |
| gene1414 | gene1414 | SACOL1439 | gi 57650036 ref NC_002951.2 :1450531-1450801 | MR150 | M36C05 | OK     | 270.866 | 397.011 | 0.551597    | -0.769763   | 0.44144  | 0.999883  |
| gene1415 | gene1415 | SACOL1440 | gi 57650036 ref NC_002951.2 :1450819-1451449 | MR150 | M36C05 | OK     | 105.369 | 170.184 | 0.691645    | -0.893429   | 0.37163  | 0.999883  |
| gene1416 | gene1416 | SACOL1441 | gi 57650036 ref NC_002951.2 :1451480-1452617 | MR150 | M36C05 | OK     | 169.813 | 236.045 | 0.475113    | -0.536856   | 0.59137  | 0.999883  |
| gene1417 | gene1417 | SACOL1442 | gi 57650036 ref NC_002951.2 :1452884-1453277 | MR150 | M36C05 | OK     | 0       | 1.70581 | 1.79769e+30 | 1.79769e+30 | 0.03514  | 0.35865   |
| gene1418 | gene1418 | brnQ3     | gi 57650036 ref NC_002951.2 :1453629-1454973 | MR150 | M36C05 | OK     | 11.1117 | 4.23992 | -1.38997    | 2.02275     | 0.0431   | 0.407192  |
| gene1419 | gene1419 | SACOL1444 | gi 57650036 ref NC_002951.2 :1455197-1457084 | MR150 | M36C05 | OK     | 7.35433 | 8.55819 | 0.218712    | -0.319392   | 0.74943  | 0.999883  |
| gene142  | gene142  | cap5M     | gi 57650036 ref NC_002951.2 :165990-167435   | MR150 | M36C05 | OK     | 1.70988 | 10.7944 | 2.65831     | -2.01301    | 0.04411  | 0.409293  |
| gene1420 | gene1420 | SACOL1445 | gi 57650036 ref NC_002951.2 :1457097-1457889 | MR150 | M36C05 | OK     | 9.82777 | 17.3299 | 0.818329    | -1.19831    | 0.2308   | 0.899929  |
| gene1421 | gene1421 | SACOL1446 | gi 57650036 ref NC_002951.2 :1458069-1458273 | MR150 | M36C05 | OK     | 151.769 | 124.765 | -0.282671   | 0.40791     | 0.68334  | 0.999883  |
| gene1422 | gene1422 | SACOL1447 | gi 57650036 ref NC_002951.2 :1458301-1459111 | MR150 | M36C05 | OK     | 171.934 | 149.914 | -0.197723   | 0.240452    | 0.80998  | 0.999883  |
| gene1423 | gene1423 | sucB      | gi 57650036 ref NC_002951.2 :1459690-1460959 | MR150 | M36C05 | OK     | 255.441 | 411.068 | 0.686386    | -0.731354   | 0.46456  | 0.999883  |
| gene1424 | gene1424 | sucA      | gi 57650036 ref NC_002951.2 :1460972-1463771 | MR150 | M36C05 | OK     | 227.68  | 375.05  | 0.720071    | -0.737955   | 0.46054  | 0.999883  |
| gene1425 | gene1425 | arlS      | gi 57650036 ref NC_002951.2 :1464054-1466066 | MR150 | M36C05 | OK     | 8.08166 | 34.902  | 2.11059     | -1.89524    | 0.05806  | 0.482975  |
| gene1426 | gene1426 | arlR      | gi 57650036 ref NC_002951.2 :1464054-1466066 | MR150 | M36C05 | OK     | 17.6373 | 119.478 | 2.76005     | -2.63449    | 0.00843  | 0.150573  |
| gene1427 | gene1427 | SACOL1452 | gi 57650036 ref NC_002951.2 :1466853-1467468 | MR150 | M36C05 | OK     | 35.7765 | 44.9512 | 0.329346    | -0.476812   | 0.6335   | 0.999883  |
| gene1428 | gene1428 | murG      | gi 57650036 ref NC_002951.2 :1467484-1468555 | MR150 | M36C05 | OK     | 17.2302 | 20.0019 | 0.215202    | -0.312034   | 0.75502  | 0.999883  |
| gene1429 | gene1429 | SACOL1454 | gi 57650036 ref NC_002951.2 :1468566-1469077 | MR150 | M36C05 | OK     | 7.37864 | 9.23144 | 0.3232      | -0.444147   | 0.65694  | 0.999883  |
| gene143  | gene143  | cap5N     | gi 57650036 ref NC_002951.2 :165990-167435   | MR150 | M36C05 | OK     | 2.44814 | 10.901  | 2.15471     | -2.52491    | 0.01157  | 0.183265  |
| gene1430 | gene1430 | SACOL1455 | gi 57650036 ref NC_002951.2 :1469476-1470967 | MR150 | M36C05 | OK     | 37.9636 | 42.2642 | 0.15482     | -0.202658   | 0.8394   | 0.999883  |
| gene1431 | gene1431 | SACOL1456 | gi 57650036 ref NC_002951.2 :1471158-1471880 | MR150 | M36C05 | OK     | 236.752 | 293.234 | 0.308674    | -0.191577   | 0.84807  | 0.999883  |
| gene1432 | gene1432 | SACOL1457 | gi 57650036 ref NC_002951.2 :1471158-1471880 | MR150 | M36C05 | OK     | 99.0984 | 181.223 | 0.87083     | -0.994791   | 0.31984  | 0.999883  |
| gene1433 | gene1433 | SACOL1459 | gi 57650036 ref NC_002951.2 :1471891-1473771 | MR150 | M36C05 | OK     | 101.858 | 172.73  | 0.761961    | -0.759438   | 0.44759  | 0.999883  |
| gene1434 | gene1434 | SACOL1460 | gi 57650036 ref NC_002951.2 :1471891-1473771 | MR150 | M36C05 | OK     | 50.9581 | 73.7652 | 0.533629    | -0.308876   | 0.75742  | 0.999883  |
| gene1435 | gene1435 | folA      | gi 57650036 ref NC_002951.2 :1473785-1474265 | MR150 | M36C05 | OK     | 50.7905 | 111.982 | 1.14064     | -1.61558    | 0.10619  | 0.653986  |
| gene1436 | gene1436 | thyA      | gi 57650036 ref NC_002951.2 :1474464-1475421 | MR150 | M36C05 | OK     | 28.1172 | 55.5043 | 0.981146    | -1.35399    | 0.17574  | 0.821477  |
| gene1437 | gene1437 | SACOL1464 | gi 57650036 ref NC_002951.2 :1475844-1476282 | MR150 | M36C05 | OK     | 100.088 | 113.983 | 0.18755     | -0.263806   | 0.79193  | 0.999883  |
| gene1438 | gene1438 | SACOL1465 | gi 57650036 ref NC_002951.2 :1476297-1477422 | MR150 | M36C05 | OK     | 68.0445 | 94.5234 | 0.474194    | -0.595922   | 0.55123  | 0.999883  |

|          |          |           |                                              |       |        |        |         |         |             |             |         |           |
|----------|----------|-----------|----------------------------------------------|-------|--------|--------|---------|---------|-------------|-------------|---------|-----------|
| gene1439 | gene1439 | SACOL1466 | gi 57650036 ref NC_002951.2 :1477459-1477711 | MR150 | M36C05 | OK     | 55.7474 | 75.1392 | 0.43066     | -0.619887   | 0.53533 | 0.999883  |
| gene144  | gene144  | cap5O     | gi 57650036 ref NC_002951.2 :167488-168751   | MR150 | M36C05 | OK     | 3.02553 | 10.8896 | 1.84769     | -2.65239    | 0.00799 | 0.14471   |
| gene1440 | gene1440 | SACOL1467 | gi 57650036 ref NC_002951.2 :1477722-1477917 | MR150 | M36C05 | OK     | 22.3723 | 75.7799 | 1.7601      | -2.06486    | 0.03894 | 0.38357   |
| gene1441 | gene1441 | SACOL1468 | gi 57650036 ref NC_002951.2 :1478161-1478866 | MR150 | M36C05 | OK     | 7.27554 | 2.84051 | -1.35691    | 1.81553     | 0.06944 | 0.522414  |
| gene1442 | gene1442 | SACOL1469 | gi 57650036 ref NC_002951.2 :1478930-1479062 | MR150 | M36C05 | OK     | 0       | 318.311 | 1.79769e+30 | 1.79769e+30 | 0.0141  | 0.204943  |
| gene1443 | gene1443 | SACOL1471 | gi 57650036 ref NC_002951.2 :1479406-1479808 | MR150 | M36C05 | OK     | 3.76651 | 2.72051 | -0.46935    | 0.50123     | 0.61621 | 0.999883  |
| gene1444 | gene1444 | ebh       | gi 57650036 ref NC_002951.2 :1479866-1511363 | MR150 | M36C05 | OK     | 1.93357 | 3.44937 | 0.835067    | -1.03752    | 0.29949 | 0.982072  |
| gene1445 | gene1445 | SACOL1475 | gi 57650036 ref NC_002951.2 :1511760-1513152 | MR150 | M36C05 | OK     | 2.18426 | 3.8841  | 0.830433    | -1.17062    | 0.24175 | 0.913135  |
| gene1446 | gene1446 | SACOL1476 | gi 57650036 ref NC_002951.2 :1513308-1514631 | MR150 | M36C05 | OK     | 2.31843 | 9.81651 | 2.08206     | -2.95748    | 0.0031  | 0.0795967 |
| gene1447 | gene1447 | ilvA1     | gi 57650036 ref NC_002951.2 :1514661-1515702 | MR150 | M36C05 | OK     | 1.82087 | 6.81798 | 1.90472     | -2.59323    | 0.00951 | 0.161634  |
| gene1448 | gene1448 | ald1      | gi 57650036 ref NC_002951.2 :1515796-1516915 | MR150 | M36C05 | OK     | 1.66639 | 5.39893 | 1.69595     | -2.30265    | 0.0213  | 0.273297  |
| gene1449 | gene1449 | SACOL1479 | gi 57650036 ref NC_002951.2 :1517389-1518268 | MR150 | M36C05 | OK     | 52.092  | 48.2438 | -0.110719   | 0.151288    | 0.87975 | 0.999883  |
| gene145  | gene145  | cap5P     | gi 57650036 ref NC_002951.2 :168797-169973   | MR150 | M36C05 | OK     | 6.90407 | 14.9111 | 1.11087     | -1.62316    | 0.10456 | 0.649503  |
| gene1450 | gene1450 | SACOL1480 | gi 57650036 ref NC_002951.2 :1518287-1521728 | MR150 | M36C05 | OK     | 35.0234 | 43.0402 | 0.297364    | -0.350987   | 0.7256  | 0.999883  |
| gene1451 | gene1451 | SACOL1481 | gi 57650036 ref NC_002951.2 :1522031-1523372 | MR150 | M36C05 | OK     | 1.87918 | 1.256   | -0.581269   | 0.758414    | 0.4482  | 0.999883  |
| gene1452 | gene1452 | SACOL1482 | gi 57650036 ref NC_002951.2 :1523577-1523910 | MR150 | M36C05 | OK     | 21.1213 | 3.21226 | -2.71703    | 3.05097     | 0.00228 | 0.063737  |
| gene1453 | gene1453 | SACOL1483 | gi 57650036 ref NC_002951.2 :1523993-1525139 | MR150 | M36C05 | OK     | 13.4364 | 8.15842 | -0.719788   | 1.05531     | 0.29128 | 0.975616  |
| gene1454 | gene1454 | SACOL1484 | gi 57650036 ref NC_002951.2 :1525789-1526134 | MR150 | M36C05 | OK     | 147.145 | 140.497 | -0.0667003  | 0.095218    | 0.92414 | 0.999883  |
| gene1455 | gene1455 | SACOL1485 | gi 57650036 ref NC_002951.2 :1526147-1527054 | MR150 | M36C05 | OK     | 81.9852 | 180.172 | 1.13594     | -1.22293    | 0.22136 | 0.89416   |
| gene1456 | gene1456 | SACOL1486 | gi 57650036 ref NC_002951.2 :1526147-1527054 | MR150 | M36C05 | OK     | 92.2271 | 149.013 | 0.69217     | -0.472384   | 0.63665 | 0.999883  |
| gene1457 | gene1457 | SACOL1488 | gi 57650036 ref NC_002951.2 :1527487-1530400 | MR150 | M36C05 | NOTEST | 0       | 0       | 0           | 0           | 1       | 1         |
| gene1458 | gene1458 | recU      | gi 57650036 ref NC_002951.2 :1527487-1530400 | MR150 | M36C05 | OK     | 84.6    | 55.5762 | -0.606189   | 0.157544    | 0.87482 | 0.999883  |
| gene1459 | gene1459 | pbp2      | gi 57650036 ref NC_002951.2 :1527487-1530400 | MR150 | M36C05 | OK     | 218.413 | 216.073 | -0.0155414  | 0.01564     | 0.98752 | 0.999883  |
| gene146  | gene146  | SACOL0152 | gi 57650036 ref NC_002951.2 :170037-170364   | MR150 | M36C05 | OK     | 13.8904 | 17.5589 | 0.33812     | -0.452386   | 0.65099 | 0.999883  |
| gene1460 | gene1460 | SACOL1491 | gi 57650036 ref NC_002951.2 :1530965-1531307 | MR150 | M36C05 | OK     | 44.041  | 33.3319 | -0.401945   | 0.585187    | 0.55842 | 0.999883  |
| gene1461 | gene1461 | nth       | gi 57650036 ref NC_002951.2 :1531311-1532647 | MR150 | M36C05 | OK     | 35.6073 | 37.9067 | 0.0902777   | -0.083115   | 0.93376 | 0.999883  |
| gene1462 | gene1462 | SACOL1493 | gi 57650036 ref NC_002951.2 :1531311-1532647 | MR150 | M36C05 | OK     | 31.7487 | 49.6234 | 0.644324    | -0.636498   | 0.52445 | 0.999883  |
| gene1463 | gene1463 | asnC      | gi 57650036 ref NC_002951.2 :1532974-1534267 | MR150 | M36C05 | OK     | 93.6001 | 42.8662 | -1.12667    | 1.42196     | 0.15504 | 0.769852  |
| gene1464 | gene1464 | SACOL1495 | gi 57650036 ref NC_002951.2 :1534588-1537282 | MR150 | M36C05 | OK     | 32.4296 | 14.4921 | -1.16205    | 1.50779     | 0.13161 | 0.718832  |
| gene1465 | gene1465 | birA      | gi 57650036 ref NC_002951.2 :1537305-1539466 | MR150 | M36C05 | OK     | 39.4724 | 39.8543 | 0.0138907   | -0.01388    | 0.98893 | 0.999883  |
| gene1466 | gene1466 | papS      | gi 57650036 ref NC_002951.2 :1537305-1539466 | MR150 | M36C05 | OK     | 29.6215 | 13.4102 | -1.14331    | 0.921314    | 0.35689 | 0.999883  |
| gene1467 | gene1467 | SACOL1498 | gi 57650036 ref NC_002951.2 :1539470-1540625 | MR150 | M36C05 | OK     | 31.9116 | 18.3565 | -0.797791   | 1.12686     | 0.2598  | 0.939148  |
| gene1468 | gene1468 | SACOL1499 | gi 57650036 ref NC_002951.2 :1540853-1541171 | MR150 | M36C05 | OK     | 32.0578 | 35.6129 | 0.151721    | -0.21777    | 0.82761 | 0.999883  |

|          |          |           |                                              |       |        |        |         |         |            |           |         |           |
|----------|----------|-----------|----------------------------------------------|-------|--------|--------|---------|---------|------------|-----------|---------|-----------|
| gene1469 | gene1469 | SACOL1500 | gi 57650036 ref NC_002951.2 :1541507-1542215 | MR150 | M36C05 | OK     | 1544.46 | 3002.25 | 0.958939   | -0.985202 | 0.32453 | 0.999883  |
| gene147  | gene147  | SACOL0153 | gi 57650036 ref NC_002951.2 :170370-170754   | MR150 | M36C05 | OK     | 3.29641 | 4.16676 | 0.338031   | -0.366603 | 0.71392 | 0.999883  |
| gene1470 | gene1470 | SACOL1501 | gi 57650036 ref NC_002951.2 :1542259-1543412 | MR150 | M36C05 | OK     | 13.4119 | 19.917  | 0.570486   | -0.562053 | 0.57408 | 0.999883  |
| gene1471 | gene1471 | SACOL1502 | gi 57650036 ref NC_002951.2 :1542259-1543412 | MR150 | M36C05 | OK     | 19.9449 | 19.3792 | -0.0415116 | 0.044179  | 0.96476 | 0.999883  |
| gene1472 | gene1472 | SACOL1503 | gi 57650036 ref NC_002951.2 :1543425-1544670 | MR150 | M36C05 | OK     | 25.94   | 23.6316 | -0.134461  | 0.188862  | 0.8502  | 0.999883  |
| gene1473 | gene1473 | aroA      | gi 57650036 ref NC_002951.2 :1544676-1545975 | MR150 | M36C05 | OK     | 26.1988 | 30.0932 | 0.199935   | -0.275976 | 0.78257 | 0.999883  |
| gene1474 | gene1474 | aroB      | gi 57650036 ref NC_002951.2 :1545984-1547049 | MR150 | M36C05 | OK     | 15.7563 | 24.3474 | 0.627841   | -0.906732 | 0.36455 | 0.999883  |
| gene1475 | gene1475 | aroC      | gi 57650036 ref NC_002951.2 :1547074-1548241 | MR150 | M36C05 | OK     | 22.647  | 29.7581 | 0.393962   | -0.554439 | 0.57928 | 0.999883  |
| gene1476 | gene1476 | SACOL1507 | gi 57650036 ref NC_002951.2 :1548626-1548827 | MR150 | M36C05 | NOTEST | 0       | 0       | 0          | 0         | 1       | 1         |
| gene1477 | gene1477 | SACOL1508 | gi 57650036 ref NC_002951.2 :1548855-1548981 | MR150 | M36C05 | NOTEST | 0       | 0       | 0          | 0         | 1       | 1         |
| gene1478 | gene1478 | ndk       | gi 57650036 ref NC_002951.2 :1549035-1549485 | MR150 | M36C05 | OK     | 259.126 | 50.753  | -2.35209   | 3.20042   | 0.00137 | 0.0435582 |
| gene1479 | gene1479 | SACOL1510 | gi 57650036 ref NC_002951.2 :1549576-1550536 | MR150 | M36C05 | OK     | 70.9224 | 36.2762 | -0.967217  | 1.30336   | 0.19245 | 0.852374  |
| gene148  | gene148  | aldA1     | gi 57650036 ref NC_002951.2 :171180-172668   | MR150 | M36C05 | OK     | 1141.56 | 1700.41 | 0.57488    | -0.599384 | 0.54892 | 0.999883  |
| gene1480 | gene1480 | ubiE      | gi 57650036 ref NC_002951.2 :1550537-1551263 | MR150 | M36C05 | OK     | 129.81  | 125.648 | -0.0470113 | 0.059814  | 0.9523  | 0.999883  |
| gene1481 | gene1481 | SACOL1512 | gi 57650036 ref NC_002951.2 :1551265-1551838 | MR150 | M36C05 | OK     | 93.9605 | 88.2049 | -0.0911956 | 0.124647  | 0.9008  | 0.999883  |
| gene1482 | gene1482 | hup       | gi 57650036 ref NC_002951.2 :1552268-1552541 | MR150 | M36C05 | OK     | 6953.02 | 10892   | 0.647554   | -0.663447 | 0.50705 | 0.999883  |
| gene1483 | gene1483 | gpsA      | gi 57650036 ref NC_002951.2 :1552711-1553710 | MR150 | M36C05 | OK     | 88.9275 | 61.9686 | -0.521094  | 0.671529  | 0.50188 | 0.999883  |
| gene1484 | gene1484 | engA      | gi 57650036 ref NC_002951.2 :1553726-1555037 | MR150 | M36C05 | OK     | 69.201  | 62.8102 | -0.139794  | 0.176059  | 0.86025 | 0.999883  |
| gene1485 | gene1485 | rpsA      | gi 57650036 ref NC_002951.2 :1555258-1556434 | MR150 | M36C05 | OK     | 375.644 | 559.846 | 0.575663   | -0.601427 | 0.54756 | 0.999883  |
| gene1486 | gene1486 | cmk       | gi 57650036 ref NC_002951.2 :1557145-1557805 | MR150 | M36C05 | OK     | 68.5525 | 40.3058 | -0.766219  | 1.07882   | 0.28067 | 0.965951  |
| gene1487 | gene1487 | ansA      | gi 57650036 ref NC_002951.2 :1557881-1558850 | MR150 | M36C05 | OK     | 16.1293 | 6.16641 | -1.38718   | 2.01811   | 0.04358 | 0.40838   |
| gene1488 | gene1488 | SACOL1520 | gi 57650036 ref NC_002951.2 :1558964-1559951 | MR150 | M36C05 | OK     | 51.9515 | 33.3489 | -0.639528  | 0.87647   | 0.38078 | 0.999883  |
| gene1489 | gene1489 | SACOL1521 | gi 57650036 ref NC_002951.2 :1560111-1560228 | MR150 | M36C05 | NOTEST | 0       | 0       | 0          | 0         | 1       | 1         |
| gene149  | gene149  | SACOL0155 | gi 57650036 ref NC_002951.2 :173313-174273   | MR150 | M36C05 | OK     | 23.1707 | 60.9441 | 1.39519    | -1.92541  | 0.05418 | 0.462646  |
| gene1490 | gene1490 | SACOL1522 | gi 57650036 ref NC_002951.2 :1560352-1561813 | MR150 | M36C05 | OK     | 236.843 | 926.161 | 1.96733    | -2.06704  | 0.03873 | 0.383437  |
| gene1491 | gene1491 | recQ2     | gi 57650036 ref NC_002951.2 :1561965-1564288 | MR150 | M36C05 | OK     | 16.3538 | 36.3403 | 1.15194    | -1.08583  | 0.27756 | 0.963271  |
| gene1492 | gene1492 | SACOL1524 | gi 57650036 ref NC_002951.2 :1561965-1564288 | MR150 | M36C05 | OK     | 25.9951 | 44.9021 | 0.788544   | -0.699968 | 0.48395 | 0.999883  |
| gene1493 | gene1493 | fer       | gi 57650036 ref NC_002951.2 :1564395-1564644 | MR150 | M36C05 | OK     | 240.136 | 134.052 | -0.841059  | 1.22859   | 0.21923 | 0.89416   |
| gene1494 | gene1494 | SACOL1526 | gi 57650036 ref NC_002951.2 :1564749-1565295 | MR150 | M36C05 | OK     | 112.336 | 36.6988 | -1.61402   | 2.2621    | 0.02369 | 0.292955  |
| gene1495 | gene1495 | SACOL1528 | gi 57650036 ref NC_002951.2 :1565891-1566806 | MR150 | M36C05 | OK     | 2.35574 | 1.85098 | -0.347891  | 0.443362  | 0.6575  | 0.999883  |
| gene1496 | gene1496 | SACOL1529 | gi 57650036 ref NC_002951.2 :1566820-1567898 | MR150 | M36C05 | OK     | 4.33328 | 3.09463 | -0.485691  | 0.212273  | 0.83189 | 0.999883  |
| gene1497 | gene1497 | SACOL1530 | gi 57650036 ref NC_002951.2 :1566820-1567898 | MR150 | M36C05 | NOTEST | 0.45101 | 0.32487 | -0.473289  | 0.320098  | 0.74889 | 1         |
| gene1498 | gene1498 | SACOL1531 | gi 57650036 ref NC_002951.2 :1568015-1568933 | MR150 | M36C05 | OK     | 0.21326 | 1.84324 | 3.11153    | -2.39852  | 0.01646 | 0.230359  |



|          |          |           |                                              |       |        |        |         |         |            |           |          |          |
|----------|----------|-----------|----------------------------------------------|-------|--------|--------|---------|---------|------------|-----------|----------|----------|
| gene1499 | gene1499 | SACOL1532 | gi 57650036 ref NC_002951.2 :1569023-1572048 | MR150 | M36C05 | OK     | 19.1956 | 18.8631 | -0.0252068 | 0.028144  | 0.97755  | 0.999883 |
| gene15   | gene15   | dnaB      | gi 57650036 ref NC_002951.2 :20786-22187     | MR150 | M36C05 | OK     | 86.461  | 32.2166 | -1.42425   | 1.81164   | 0.07004  | 0.522414 |
| gene150  | gene150  | SACOL0156 | gi 57650036 ref NC_002951.2 :174334-174538   | MR150 | M36C05 | OK     | 50.5897 | 830.669 | 4.03736    | -5.43203  | 5.57E-08 | 1.02E-05 |
| gene1500 | gene1500 | SACOL1533 | gi 57650036 ref NC_002951.2 :1569023-1572048 | MR150 | M36C05 | OK     | 22.3963 | 19.59   | -0.193146  | 0.132133  | 0.89488  | 0.999883 |
| gene1501 | gene1501 | srrB      | gi 57650036 ref NC_002951.2 :1572352-1574810 | MR150 | M36C05 | OK     | 23.1921 | 11.7886 | -0.976246  | 0.687999  | 0.49145  | 0.999883 |
| gene1502 | gene1502 | srrA      | gi 57650036 ref NC_002951.2 :1572352-1574810 | MR150 | M36C05 | OK     | 130.683 | 81.8076 | -0.675765  | 0.691586  | 0.4892   | 0.999883 |
| gene1503 | gene1503 | rluB      | gi 57650036 ref NC_002951.2 :1574942-1576939 | MR150 | M36C05 | OK     | 49.7991 | 26.4549 | -0.912583  | 0.736782  | 0.46126  | 0.999883 |
| gene1504 | gene1504 | scpB      | gi 57650036 ref NC_002951.2 :1574942-1576939 | MR150 | M36C05 | OK     | 40.5978 | 20.6025 | -0.97858   | 0.562528  | 0.57376  | 0.999883 |
| gene1505 | gene1505 | scpA      | gi 57650036 ref NC_002951.2 :1574942-1576939 | MR150 | M36C05 | OK     | 41.4393 | 38.5752 | -0.103328  | 0.086231  | 0.93128  | 0.999883 |
| gene1506 | gene1506 | SACOL1539 | gi 57650036 ref NC_002951.2 :1577030-1577537 | MR150 | M36C05 | OK     | 13.9523 | 39.5649 | 1.50371    | -2.18189  | 0.02912  | 0.324689 |
| gene1507 | gene1507 | xerD      | gi 57650036 ref NC_002951.2 :1577614-1578502 | MR150 | M36C05 | OK     | 21.3656 | 18.4356 | -0.212796  | 0.310557  | 0.75614  | 0.999883 |
| gene1508 | gene1508 | SACOL1541 | gi 57650036 ref NC_002951.2 :1578550-1579000 | MR150 | M36C05 | OK     | 89.8384 | 227.285 | 1.3391     | -1.81423  | 0.06964  | 0.522414 |
| gene1509 | gene1509 | SACOL1542 | gi 57650036 ref NC_002951.2 :1579104-1579647 | MR150 | M36C05 | OK     | 17.399  | 24.1436 | 0.472631   | -0.692661 | 0.48852  | 0.999883 |
| gene151  | gene151  | SACOL0157 | gi 57650036 ref NC_002951.2 :174716-175229   | MR150 | M36C05 | OK     | 17.1072 | 17.9921 | 0.072765   | -0.105954 | 0.91562  | 0.999883 |
| gene1510 | gene1510 | SACOL1543 | gi 57650036 ref NC_002951.2 :1579728-1580637 | MR150 | M36C05 | OK     | 74.0776 | 87.2665 | 0.236392   | -0.306257 | 0.75941  | 0.999883 |
| gene1511 | gene1511 | SACOL1544 | gi 57650036 ref NC_002951.2 :1580852-1581101 | MR150 | M36C05 | OK     | 6.927   | 18.2046 | 1.394      | -1.5085   | 0.13143  | 0.718382 |
| gene1512 | gene1512 | SACOL1545 | gi 57650036 ref NC_002951.2 :1581116-1581872 | MR150 | M36C05 | OK     | 8.53615 | 17.8585 | 1.06495    | -1.55254  | 0.12053  | 0.689371 |
| gene1513 | gene1513 | proC      | gi 57650036 ref NC_002951.2 :1582013-1582829 | MR150 | M36C05 | OK     | 91.4684 | 75.0316 | -0.285775  | 0.374484  | 0.70805  | 0.999883 |
| gene1514 | gene1514 | SACOL1548 | gi 57650036 ref NC_002951.2 :1582933-1583854 | MR150 | M36C05 | OK     | 26.3347 | 14.2256 | -0.88848   | 1.29163   | 0.19649  | 0.859712 |
| gene1515 | gene1515 | zwf       | gi 57650036 ref NC_002951.2 :1584166-1585651 | MR150 | M36C05 | OK     | 110.37  | 227.749 | 1.0451     | -1.17098  | 0.24161  | 0.913066 |
| gene1516 | gene1516 | SACOL1550 | gi 57650036 ref NC_002951.2 :1585853-1586747 | MR150 | M36C05 | OK     | 45.0095 | 55.7815 | 0.309556   | -0.421965 | 0.67305  | 0.999883 |
| gene1517 | gene1517 | malA      | gi 57650036 ref NC_002951.2 :1586829-1588479 | MR150 | M36C05 | OK     | 14.8939 | 15.6589 | 0.0722613  | -0.102874 | 0.91806  | 0.999883 |
| gene1518 | gene1518 | malR      | gi 57650036 ref NC_002951.2 :1588494-1589514 | MR150 | M36C05 | OK     | 4.85545 | 4.97563 | 0.0352722  | -0.050502 | 0.95972  | 0.999883 |
| gene1519 | gene1519 | SACOL1553 | gi 57650036 ref NC_002951.2 :1589707-1590079 | MR150 | M36C05 | OK     | 615.879 | 903.08  | 0.552206   | -0.64954  | 0.51599  | 0.999883 |
| gene152  | gene152  | SACOL0158 | gi 57650036 ref NC_002951.2 :175570-178057   | MR150 | M36C05 | OK     | 1.80313 | 4.03672 | 1.16268    | -1.52498  | 0.12726  | 0.707889 |
| gene1520 | gene1520 | gnd       | gi 57650036 ref NC_002951.2 :1590297-1591704 | MR150 | M36C05 | OK     | 301.11  | 338.555 | 0.1691     | -0.178285 | 0.8585   | 0.999883 |
| gene1521 | gene1521 | SACOL1555 | gi 57650036 ref NC_002951.2 :1591771-1592905 | MR150 | M36C05 | OK     | 58.535  | 132.449 | 1.17807    | -1.45833  | 0.14475  | 0.743774 |
| gene1522 | gene1522 | SACOL1556 | gi 57650036 ref NC_002951.2 :1593167-1593347 | MR150 | M36C05 | NOTEST | 0       | 0       | 0          | 0         | 1        | 1        |
| gene1523 | gene1523 | SACOL1557 | gi 57650036 ref NC_002951.2 :1593473-1594454 | MR150 | M36C05 | OK     | 67.8399 | 51.82   | -0.388625  | 0.514325  | 0.60703  | 0.999883 |
| gene1524 | gene1524 | SACOL1558 | gi 57650036 ref NC_002951.2 :1594467-1594905 | MR150 | M36C05 | OK     | 61.5926 | 54.2114 | -0.18416   | 0.268699  | 0.78816  | 0.999883 |
| gene1525 | gene1525 | SACOL1559 | gi 57650036 ref NC_002951.2 :1594977-1595076 | MR150 | M36C05 | NOTEST | 0       | 0       | 0          | 0         | 1        | 1        |
| gene1526 | gene1526 | SACOL1560 | gi 57650036 ref NC_002951.2 :1595255-1596530 | MR150 | M36C05 | OK     | 93.7422 | 28.9196 | -1.69665   | 2.18457   | 0.02892  | 0.323976 |
| gene1527 | gene1527 | SACOL1561 | gi 57650036 ref NC_002951.2 :1596542-1598518 | MR150 | M36C05 | OK     | 62.1115 | 26.5844 | -1.22428   | 1.05331   | 0.2922   | 0.976283 |

|          |          |           |                                              |       |        |        |         |         |             |             |         |          |
|----------|----------|-----------|----------------------------------------------|-------|--------|--------|---------|---------|-------------|-------------|---------|----------|
| gene1528 | gene1528 | SACOL1562 | gi 57650036 ref NC_002951.2 :1596542-1598518 | MR150 | M36C05 | OK     | 62.9517 | 34.4869 | -0.868199   | 0.800627    | 0.42335 | 0.999883 |
| gene1529 | gene1529 | lpdA      | gi 57650036 ref NC_002951.2 :1598533-1599955 | MR150 | M36C05 | OK     | 52.8905 | 32.1136 | -0.719824   | 0.943448    | 0.34545 | 0.999883 |
| gene153  | gene153  | SACOL0159 | gi 57650036 ref NC_002951.2 :175570-178057   | MR150 | M36C05 | OK     | 1.36211 | 1.37414 | 0.0126857   | -0.006993   | 0.99442 | 0.999883 |
| gene1530 | gene1530 | recN      | gi 57650036 ref NC_002951.2 :1600105-1601785 | MR150 | M36C05 | OK     | 72.3394 | 70.0785 | -0.0458105  | 0.05522     | 0.95596 | 0.999883 |
| gene1531 | gene1531 | argR      | gi 57650036 ref NC_002951.2 :1601800-1602253 | MR150 | M36C05 | OK     | 96.0311 | 105.546 | 0.136298    | -0.191709   | 0.84797 | 0.999883 |
| gene1532 | gene1532 | ispA      | gi 57650036 ref NC_002951.2 :1602684-1605104 | MR150 | M36C05 | OK     | 75.6616 | 57.8963 | -0.38609    | 0.299617    | 0.76447 | 0.999883 |
| gene1533 | gene1533 | xseB      | gi 57650036 ref NC_002951.2 :1602684-1605104 | MR150 | M36C05 | OK     | 81.6062 | 47.9601 | -0.766844   | 0.15994     | 0.87293 | 0.999883 |
| gene1534 | gene1534 | xseA      | gi 57650036 ref NC_002951.2 :1602684-1605104 | MR150 | M36C05 | OK     | 54.7745 | 50.0819 | -0.129215   | 0.115127    | 0.90834 | 0.999883 |
| gene1535 | gene1535 | nusB      | gi 57650036 ref NC_002951.2 :1605120-1605510 | MR150 | M36C05 | OK     | 74.3227 | 79.081  | 0.0895285   | -0.13035    | 0.89629 | 0.999883 |
| gene1536 | gene1536 | SACOL1570 | gi 57650036 ref NC_002951.2 :1605569-1605932 | MR150 | M36C05 | OK     | 68.3762 | 120.145 | 0.813212    | -1.1797     | 0.23812 | 0.909302 |
| gene1537 | gene1537 | accC      | gi 57650036 ref NC_002951.2 :1605946-1607766 | MR150 | M36C05 | OK     | 46.6351 | 36.8092 | -0.341349   | 0.391345    | 0.69554 | 0.999883 |
| gene1538 | gene1538 | accB      | gi 57650036 ref NC_002951.2 :1605946-1607766 | MR150 | M36C05 | OK     | 62.2989 | 33.7382 | -0.884825   | 0.509915    | 0.61011 | 0.999883 |
| gene1539 | gene1539 | SACOL1573 | gi 57650036 ref NC_002951.2 :1608120-1609141 | MR150 | M36C05 | OK     | 47.3763 | 34.5183 | -0.456804   | 0.625517    | 0.53163 | 0.999883 |
| gene154  | gene154  | SACOL0160 | gi 57650036 ref NC_002951.2 :178069-179101   | MR150 | M36C05 | OK     | 2.39273 | 3.4459  | 0.526227    | -0.716285   | 0.47382 | 0.999883 |
| gene1540 | gene1540 | SACOL1574 | gi 57650036 ref NC_002951.2 :1609249-1609591 | MR150 | M36C05 | OK     | 5.24298 | 8.33297 | 0.668444    | -0.780568   | 0.43506 | 0.999883 |
| gene1541 | gene1541 | SACOL1575 | gi 57650036 ref NC_002951.2 :1609646-1610237 | MR150 | M36C05 | OK     | 1.56578 | 3.95278 | 1.33599     | -1.53991    | 0.12358 | 0.696637 |
| gene1542 | gene1542 | SACOL1576 | gi 57650036 ref NC_002951.2 :1610243-1613127 | MR150 | M36C05 | OK     | 2.35037 | 11.5865 | 2.30148     | -1.98742    | 0.04688 | 0.425113 |
| gene1543 | gene1543 | SACOL1577 | gi 57650036 ref NC_002951.2 :1610243-1613127 | MR150 | M36C05 | OK     | 2.69533 | 8.09206 | 1.58605     | -1.80794    | 0.07062 | 0.522414 |
| gene1544 | gene1544 | SACOL1578 | gi 57650036 ref NC_002951.2 :1613131-1614490 | MR150 | M36C05 | NOTEST | 0.79286 | 0.85602 | 0.110584    | -0.129494   | 0.89697 | 1        |
| gene1545 | gene1545 | SACOL1579 | gi 57650036 ref NC_002951.2 :1614543-1617039 | MR150 | M36C05 | OK     | 1.06745 | 2.68771 | 1.33221     | -1.88229    | 0.0598  | 0.491837 |
| gene1546 | gene1546 | SACOL1580 | gi 57650036 ref NC_002951.2 :1617073-1617457 | MR150 | M36C05 | OK     | 0.8241  | 1.78576 | 1.11564     | -0.789308   | 0.42993 | 0.999883 |
| gene1547 | gene1547 | SACOL1581 | gi 57650036 ref NC_002951.2 :1617468-1617729 | MR150 | M36C05 | OK     | 2.01969 | 10.1443 | 2.32847     | -1.75319    | 0.07957 | 0.560699 |
| gene1548 | gene1548 | SACOL1582 | gi 57650036 ref NC_002951.2 :1617733-1618789 | MR150 | M36C05 | OK     | 1.96788 | 1.6746  | -0.232825   | 0.29888     | 0.76503 | 0.999883 |
| gene1549 | gene1549 | SACOL1583 | gi 57650036 ref NC_002951.2 :1618849-1619941 | MR150 | M36C05 | OK     | 3.26193 | 4.20278 | 0.365618    | -0.515034   | 0.60653 | 0.999883 |
| gene155  | gene155  | SACOL0161 | gi 57650036 ref NC_002951.2 :179317-179677   | MR150 | M36C05 | OK     | 676.887 | 265.538 | -1.35       | 1.7018      | 0.08879 | 0.597944 |
| gene1550 | gene1550 | SACOL1584 | gi 57650036 ref NC_002951.2 :1620115-1620418 | MR150 | M36C05 | OK     | 1.38047 | 1.99077 | 0.528168    | -0.347497   | 0.72822 | 0.999883 |
| gene1551 | gene1551 | SACOL1585 | gi 57650036 ref NC_002951.2 :1620431-1620752 | MR150 | M36C05 | OK     | 7.24133 | 5.22968 | -0.469533   | 0.524025    | 0.60026 | 0.999883 |
| gene1552 | gene1552 | SACOL1586 | gi 57650036 ref NC_002951.2 :1620902-1621187 | MR150 | M36C05 | OK     | 0       | 1.15323 | 1.79769e+30 | 1.79769e+30 | 0.14732 | 0.743774 |
| gene1553 | gene1553 | efp       | gi 57650036 ref NC_002951.2 :1621581-1622139 | MR150 | M36C05 | OK     | 300.085 | 297.924 | -0.0104245  | 0.012543    | 0.98999 | 0.999883 |
| gene1554 | gene1554 | SACOL1588 | gi 57650036 ref NC_002951.2 :1622164-1623226 | MR150 | M36C05 | OK     | 57.0266 | 77.646  | 0.445276    | -0.5761     | 0.56455 | 0.999883 |
| gene1555 | gene1555 | SACOL1589 | gi 57650036 ref NC_002951.2 :1623330-1623912 | MR150 | M36C05 | OK     | 22.8373 | 30.9235 | 0.437311    | -0.642031   | 0.52085 | 0.999883 |
| gene1556 | gene1556 | SACOL1590 | gi 57650036 ref NC_002951.2 :1623925-1624144 | MR150 | M36C05 | OK     | 111.972 | 57.5312 | -0.960728   | 1.3541      | 0.1757  | 0.821477 |
| gene1557 | gene1557 | SACOL1591 | gi 57650036 ref NC_002951.2 :1624207-1625038 | MR150 | M36C05 | OK     | 57.5081 | 47.5484 | -0.274369   | 0.37607     | 0.70687 | 0.999883 |

|          |          |           |                                              |       |        |        |         |         |             |             |         |           |
|----------|----------|-----------|----------------------------------------------|-------|--------|--------|---------|---------|-------------|-------------|---------|-----------|
| gene1558 | gene1558 | SACOL1592 | gi 57650036 ref NC_002951.2 :1625195-1625582 | MR150 | M36C05 | OK     | 116.85  | 64.4724 | -0.857903   | 1.23879     | 0.21542 | 0.89416   |
| gene1559 | gene1559 | SACOL1593 | gi 57650036 ref NC_002951.2 :1625946-1628758 | MR150 | M36C05 | OK     | 44.5159 | 22.0805 | -1.01154    | 0.896203    | 0.37014 | 0.999883  |
| gene156  | gene156  | SACOL0162 | gi 57650036 ref NC_002951.2 :179849-180875   | MR150 | M36C05 | OK     | 4.26402 | 7.20892 | 0.757568    | -1.08983    | 0.27579 | 0.961224  |
| gene1560 | gene1560 | SACOL1594 | gi 57650036 ref NC_002951.2 :1625946-1628758 | MR150 | M36C05 | OK     | 49.6714 | 22.9702 | -1.11265    | 0.972711    | 0.3307  | 0.999883  |
| gene1561 | gene1561 | gcvT      | gi 57650036 ref NC_002951.2 :1628777-1629869 | MR150 | M36C05 | OK     | 27.984  | 18.1709 | -0.622973   | 0.890393    | 0.37326 | 0.999883  |
| gene1562 | gene1562 | aroK      | gi 57650036 ref NC_002951.2 :1630027-1630552 | MR150 | M36C05 | OK     | 33.8961 | 28.1999 | -0.26543    | 0.389938    | 0.69658 | 0.999883  |
| gene1563 | gene1563 | SACOL1597 | gi 57650036 ref NC_002951.2 :1630784-1631282 | MR150 | M36C05 | OK     | 2.05318 | 0.74108 | -1.47016    | 1.2441      | 0.21346 | 0.89416   |
| gene1564 | gene1564 | SACOL1598 | gi 57650036 ref NC_002951.2 :1631485-1632221 | MR150 | M36C05 | NOTEST | 0       | 0       | 0           | 0           | 1       | 1         |
| gene1565 | gene1565 | comGC     | gi 57650036 ref NC_002951.2 :1631485-1632221 | MR150 | M36C05 | OK     | 0       | 1.85983 | 1.79769e+30 | 1.79769e+30 | 0.10237 | 0.641957  |
| gene1566 | gene1566 | SACOL1600 | gi 57650036 ref NC_002951.2 :1632234-1634251 | MR150 | M36C05 | OK     | 0.87909 | 1.26595 | 0.526131    | -0.415702   | 0.67763 | 0.999883  |
| gene1567 | gene1567 | SACOL1601 | gi 57650036 ref NC_002951.2 :1632234-1634251 | MR150 | M36C05 | OK     | 2.56862 | 1.99211 | -0.3667     | 0.404459    | 0.68588 | 0.999883  |
| gene1568 | gene1568 | SACOL1602 | gi 57650036 ref NC_002951.2 :1634302-1637882 | MR150 | M36C05 | OK     | 72.9237 | 34.6234 | -1.07464    | 0.581715    | 0.56076 | 0.999883  |
| gene1569 | gene1569 | SACOL1603 | gi 57650036 ref NC_002951.2 :1634302-1637882 | MR150 | M36C05 | OK     | 52.1722 | 43.4238 | -0.264796   | 0.078225    | 0.93765 | 0.999883  |
| gene157  | gene157  | SACOL0163 | gi 57650036 ref NC_002951.2 :181260-182511   | MR150 | M36C05 | OK     | 33.0779 | 21.7134 | -0.607282   | 0.844698    | 0.39828 | 0.999883  |
| gene1570 | gene1570 | glk       | gi 57650036 ref NC_002951.2 :1634302-1637882 | MR150 | M36C05 | OK     | 54.6756 | 37.6926 | -0.536614   | 0.376399    | 0.70662 | 0.999883  |
| gene1571 | gene1571 | SACOL1605 | gi 57650036 ref NC_002951.2 :1634302-1637882 | MR150 | M36C05 | OK     | 18.3963 | 13.1331 | -0.486204   | 0.041076    | 0.96724 | 0.999883  |
| gene1572 | gene1572 | SACOL1606 | gi 57650036 ref NC_002951.2 :1634302-1637882 | MR150 | M36C05 | OK     | 39.2589 | 26.6854 | -0.556969   | 0.418209    | 0.67579 | 0.999883  |
| gene1573 | gene1573 | SACOL1607 | gi 57650036 ref NC_002951.2 :1637893-1638433 | MR150 | M36C05 | OK     | 45.4558 | 36.6976 | -0.308779   | 0.450283    | 0.65251 | 0.999883  |
| gene1574 | gene1574 | rpmG      | gi 57650036 ref NC_002951.2 :1638641-1638791 | MR150 | M36C05 | OK     | 2056.82 | 474.778 | -2.11509    | 3.01829     | 0.00254 | 0.0691808 |
| gene1575 | gene1575 | pbp3      | gi 57650036 ref NC_002951.2 :1638903-1640979 | MR150 | M36C05 | OK     | 106.062 | 86.5313 | -0.293612   | 0.33324     | 0.73895 | 0.999883  |
| gene1576 | gene1576 | sodA2     | gi 57650036 ref NC_002951.2 :1641099-1641699 | MR150 | M36C05 | OK     | 153.441 | 307.438 | 1.00261     | -1.23458    | 0.21699 | 0.89416   |
| gene1577 | gene1577 | SACOL1611 | gi 57650036 ref NC_002951.2 :1641974-1643235 | MR150 | M36C05 | OK     | 33.9359 | 11.9947 | -1.50042    | 1.32586     | 0.18488 | 0.835733  |
| gene1578 | gene1578 | SACOL1612 | gi 57650036 ref NC_002951.2 :1641974-1643235 | MR150 | M36C05 | OK     | 14.2971 | 8.13945 | -0.812716   | 0.932258    | 0.3512  | 0.999883  |
| gene1579 | gene1579 | SACOL1613 | gi 57650036 ref NC_002951.2 :1643276-1644062 | MR150 | M36C05 | OK     | 22.9919 | 13.1778 | -0.80302    | 1.1763      | 0.23948 | 0.910714  |
| gene158  | gene158  | SACOL0164 | gi 57650036 ref NC_002951.2 :182957-190133   | MR150 | M36C05 | OK     | 24.4419 | 16.0294 | -0.608637   | 0.710907    | 0.47714 | 0.999883  |
| gene1580 | gene1580 | nfo       | gi 57650036 ref NC_002951.2 :1644187-1645078 | MR150 | M36C05 | OK     | 75.1198 | 32.4013 | -1.21314    | 1.6523      | 0.09847 | 0.633472  |
| gene1581 | gene1581 | SACOL1615 | gi 57650036 ref NC_002951.2 :1645087-1646434 | MR150 | M36C05 | OK     | 54.2113 | 29.5056 | -0.877604   | 1.16144     | 0.24547 | 0.919205  |
| gene1582 | gene1582 | SACOL1616 | gi 57650036 ref NC_002951.2 :1646547-1647648 | MR150 | M36C05 | OK     | 47.5906 | 50.9082 | 0.0972194   | -0.129223   | 0.89718 | 0.999883  |
| gene1583 | gene1583 | SACOL1617 | gi 57650036 ref NC_002951.2 :1647650-1648328 | MR150 | M36C05 | OK     | 25.6206 | 46.8656 | 0.871225    | -1.25717    | 0.20869 | 0.885625  |
| gene1584 | gene1584 | rpoD      | gi 57650036 ref NC_002951.2 :1648458-1649565 | MR150 | M36C05 | OK     | 105.189 | 173.473 | 0.721731    | -0.854581   | 0.39278 | 0.999883  |
| gene1585 | gene1585 | dnaG      | gi 57650036 ref NC_002951.2 :1649788-1651588 | MR150 | M36C05 | OK     | 83.8594 | 57.9314 | -0.533628   | 0.63879     | 0.52296 | 0.999883  |
| gene1586 | gene1586 | SACOL1620 | gi 57650036 ref NC_002951.2 :1651648-1652467 | MR150 | M36C05 | OK     | 48.4809 | 54.3522 | 0.164922    | -0.226972   | 0.82045 | 0.999883  |
| gene1587 | gene1587 | SACOL1621 | gi 57650036 ref NC_002951.2 :1652477-1653017 | MR150 | M36C05 | OK     | 17.1022 | 15.2636 | -0.164085   | 0.238899    | 0.81118 | 0.999883  |

|          |          |           |                                              |       |        |        |         |         |            |           |         |          |
|----------|----------|-----------|----------------------------------------------|-------|--------|--------|---------|---------|------------|-----------|---------|----------|
| gene1588 | gene1588 | glyS      | gi 57650036 ref NC_002951.2 :1653435-1654827 | MR150 | M36C05 | OK     | 233.331 | 446.672 | 0.936838   | -0.99174  | 0.32132 | 0.999883 |
| gene1589 | gene1589 | SACOL1623 | gi 57650036 ref NC_002951.2 :1654976-1655729 | MR150 | M36C05 | OK     | 102.159 | 50.4749 | -1.01717   | 1.36627   | 0.17186 | 0.817635 |
| gene159  | gene159  | SACOL0165 | gi 57650036 ref NC_002951.2 :190145-190790   | MR150 | M36C05 | OK     | 50.2221 | 32.4904 | -0.628307  | 0.904386  | 0.36579 | 0.999883 |
| gene1590 | gene1590 | era       | gi 57650036 ref NC_002951.2 :1655750-1656650 | MR150 | M36C05 | OK     | 75.0295 | 56.2481 | -0.415652  | 0.551126  | 0.58155 | 0.999883 |
| gene1591 | gene1591 | cdd       | gi 57650036 ref NC_002951.2 :1656650-1657055 | MR150 | M36C05 | OK     | 61.6357 | 44.5186 | -0.469358  | 0.688397  | 0.4912  | 0.999883 |
| gene1592 | gene1592 | dgkA      | gi 57650036 ref NC_002951.2 :1657065-1657410 | MR150 | M36C05 | OK     | 71.0001 | 66.16   | -0.101862  | 0.149666  | 0.88103 | 0.999883 |
| gene1593 | gene1593 | SACOL1627 | gi 57650036 ref NC_002951.2 :1657412-1657880 | MR150 | M36C05 | OK     | 90.6984 | 124.8   | 0.460472   | -0.640203 | 0.52204 | 0.999883 |
| gene1594 | gene1594 | SACOL1628 | gi 57650036 ref NC_002951.2 :1657880-1658801 | MR150 | M36C05 | OK     | 65.1997 | 130.937 | 1.00593    | -1.27616  | 0.2019  | 0.871284 |
| gene1595 | gene1595 | SACOL1629 | gi 57650036 ref NC_002951.2 :1659131-1659830 | MR150 | M36C05 | OK     | 333.787 | 459.513 | 0.461177   | -0.518928 | 0.60381 | 0.999883 |
| gene1596 | gene1596 | SACOL1630 | gi 57650036 ref NC_002951.2 :1659846-1660836 | MR150 | M36C05 | OK     | 281.257 | 409.832 | 0.543146   | -0.592126 | 0.55377 | 0.999883 |
| gene1597 | gene1597 | SACOL1631 | gi 57650036 ref NC_002951.2 :1660853-1661561 | MR150 | M36C05 | OK     | 292.921 | 338.627 | 0.20919    | -0.240376 | 0.81004 | 0.999883 |
| gene1598 | gene1598 | rpsU      | gi 57650036 ref NC_002951.2 :1661780-1661957 | MR150 | M36C05 | OK     | 9074.96 | 8648.61 | -0.0694227 | 0.080172  | 0.9361  | 0.999883 |
| gene1599 | gene1599 | SACOL1633 | gi 57650036 ref NC_002951.2 :1662249-1663596 | MR150 | M36C05 | OK     | 57.95   | 36.3294 | -0.673671  | 0.878856  | 0.37948 | 0.999883 |
| gene16   | gene16   | SACOL0017 | gi 57650036 ref NC_002951.2 :22262-22355     | MR150 | M36C05 | NOTEST | 0       | 0       | 0          | 0         | 1       | 1        |
| gene160  | gene160  | SACOL0166 | gi 57650036 ref NC_002951.2 :191117-191612   | MR150 | M36C05 | OK     | 34.7391 | 121.648 | 1.80808    | -2.55115  | 0.01074 | 0.174614 |
| gene1600 | gene1600 | SACOL1634 | gi 57650036 ref NC_002951.2 :1663602-1664355 | MR150 | M36C05 | OK     | 42.6353 | 25.7362 | -0.728249  | 1.04617   | 0.29548 | 0.978474 |
| gene1601 | gene1601 | prmA      | gi 57650036 ref NC_002951.2 :1664356-1665295 | MR150 | M36C05 | OK     | 130.747 | 49.2469 | -1.40868   | 1.80574   | 0.07096 | 0.522414 |
| gene1602 | gene1602 | dnaJ      | gi 57650036 ref NC_002951.2 :1665298-1666438 | MR150 | M36C05 | OK     | 93.3518 | 45.5099 | -1.0365    | 1.32696   | 0.18452 | 0.834616 |
| gene1603 | gene1603 | dnaK      | gi 57650036 ref NC_002951.2 :1666573-1668406 | MR150 | M36C05 | OK     | 964.784 | 285.825 | -1.75507   | 1.82094   | 0.06862 | 0.522414 |
| gene1604 | gene1604 | grpE      | gi 57650036 ref NC_002951.2 :1668474-1669101 | MR150 | M36C05 | OK     | 527.674 | 112.186 | -2.23375   | 2.68172   | 0.00732 | 0.137988 |
| gene1605 | gene1605 | hrcA      | gi 57650036 ref NC_002951.2 :1669132-1670110 | MR150 | M36C05 | OK     | 424.354 | 89.8657 | -2.23943   | 2.58678   | 0.00969 | 0.163425 |
| gene1606 | gene1606 | SACOL1640 | gi 57650036 ref NC_002951.2 :1670209-1671367 | MR150 | M36C05 | OK     | 4.31616 | 3.33754 | -0.370962  | 0.526704  | 0.5984  | 0.999883 |
| gene1607 | gene1607 | lepA      | gi 57650036 ref NC_002951.2 :1671896-1673720 | MR150 | M36C05 | OK     | 31.5014 | 17.1021 | -0.881244  | 1.19049   | 0.23386 | 0.902618 |
| gene1608 | gene1608 | rpsT      | gi 57650036 ref NC_002951.2 :1674065-1674317 | MR150 | M36C05 | OK     | 887.499 | 311.748 | -1.50937   | 2.03946   | 0.0414  | 0.396038 |
| gene1609 | gene1609 | holA      | gi 57650036 ref NC_002951.2 :1674361-1675336 | MR150 | M36C05 | OK     | 16.3997 | 6.11861 | -1.42239   | 2.06866   | 0.03858 | 0.382453 |
| gene161  | gene161  | argB      | gi 57650036 ref NC_002951.2 :191866-192631   | MR150 | M36C05 | OK     | 1.62586 | 1.36683 | -0.250366  | 0.284961  | 0.77567 | 0.999883 |
| gene1610 | gene1610 | SACOL1644 | gi 57650036 ref NC_002951.2 :1675392-1677540 | MR150 | M36C05 | OK     | 4.32474 | 6.16643 | 0.511822   | -0.751223 | 0.45252 | 0.999883 |
| gene1611 | gene1611 | SACOL1645 | gi 57650036 ref NC_002951.2 :1677598-1678030 | MR150 | M36C05 | OK     | 40.7923 | 52.2686 | 0.357648   | -0.524846 | 0.59969 | 0.999883 |
| gene1612 | gene1612 | comEA     | gi 57650036 ref NC_002951.2 :1678151-1678838 | MR150 | M36C05 | OK     | 7.54424 | 5.89137 | -0.356774  | 0.501823  | 0.61579 | 0.999883 |
| gene1613 | gene1613 | SACOL1647 | gi 57650036 ref NC_002951.2 :1678877-1679594 | MR150 | M36C05 | OK     | 110.155 | 51.4344 | -1.09873   | 1.47835   | 0.13931 | 0.736061 |
| gene1614 | gene1614 | SACOL1648 | gi 57650036 ref NC_002951.2 :1679596-1679950 | MR150 | M36C05 | OK     | 97.3941 | 109.758 | 0.172418   | -0.249976 | 0.80261 | 0.999883 |
| gene1615 | gene1615 | SACOL1649 | gi 57650036 ref NC_002951.2 :1679950-1681094 | MR150 | M36C05 | OK     | 67.9788 | 53.3353 | -0.349994  | 0.356348  | 0.72158 | 0.999883 |
| gene1616 | gene1616 | nadD      | gi 57650036 ref NC_002951.2 :1679950-1681094 | MR150 | M36C05 | OK     | 77.3487 | 19.3956 | -1.99565   | 1.59954   | 0.1097  | 0.659073 |

|          |          |           |                                              |       |        |    |         |         |           |           |          |           |
|----------|----------|-----------|----------------------------------------------|-------|--------|----|---------|---------|-----------|-----------|----------|-----------|
| gene1617 | gene1617 | SACOL1651 | gi 57650036 ref NC_002951.2 :1681096-1681387 | MR150 | M36C05 | OK | 22.8366 | 5.47979 | -2.05915  | 2.38487   | 0.01709  | 0.235517  |
| gene1618 | gene1618 | aroE      | gi 57650036 ref NC_002951.2 :1681390-1682197 | MR150 | M36C05 | OK | 41.3671 | 11.4491 | -1.85325  | 2.66274   | 0.00775  | 0.14273   |
| gene1619 | gene1619 | SACOL1653 | gi 57650036 ref NC_002951.2 :1682210-1683311 | MR150 | M36C05 | OK | 32.8035 | 8.68865 | -1.91665  | 2.73369   | 0.00626  | 0.123837  |
| gene162  | gene162  | argJ      | gi 57650036 ref NC_002951.2 :192646-193888   | MR150 | M36C05 | OK | 1.46976 | 1.69284 | 0.203866  | -0.264102 | 0.7917   | 0.999883  |
| gene1620 | gene1620 | SACOL1654 | gi 57650036 ref NC_002951.2 :1683311-1683839 | MR150 | M36C05 | OK | 41.9835 | 14.1392 | -1.57012  | 2.27919   | 0.02266  | 0.286641  |
| gene1621 | gene1621 | mtn       | gi 57650036 ref NC_002951.2 :1683858-1684545 | MR150 | M36C05 | OK | 26.0905 | 11.103  | -1.23258  | 1.7983    | 0.07213  | 0.527706  |
| gene1622 | gene1622 | SACOL1656 | gi 57650036 ref NC_002951.2 :1684858-1685128 | MR150 | M36C05 | OK | 14.741  | 9.26358 | -0.670195 | 0.784041  | 0.43302  | 0.999883  |
| gene1623 | gene1623 | SACOL1657 | gi 57650036 ref NC_002951.2 :1685329-1686034 | MR150 | M36C05 | OK | 2.72833 | 3.71451 | 0.445156  | -0.573791 | 0.56611  | 0.999883  |
| gene1624 | gene1624 | SACOL1658 | gi 57650036 ref NC_002951.2 :1686495-1687716 | MR150 | M36C05 | OK | 11.5498 | 16.413  | 0.506971  | -0.738513 | 0.4602   | 0.999883  |
| gene1625 | gene1625 | SACOL1659 | gi 57650036 ref NC_002951.2 :1688004-1689234 | MR150 | M36C05 | OK | 36.5771 | 22.2635 | -0.71626  | 0.991677  | 0.32136  | 0.999883  |
| gene1626 | gene1626 | SACOL1660 | gi 57650036 ref NC_002951.2 :1689246-1691360 | MR150 | M36C05 | OK | 26.301  | 20.1501 | -0.384334 | 0.26396   | 0.79181  | 0.999883  |
| gene1627 | gene1627 | SACOL1661 | gi 57650036 ref NC_002951.2 :1689246-1691360 | MR150 | M36C05 | OK | 35.0594 | 24.8554 | -0.496242 | 0.559947  | 0.57552  | 0.999883  |
| gene1628 | gene1628 | SACOL1662 | gi 57650036 ref NC_002951.2 :1691373-1691823 | MR150 | M36C05 | OK | 12.8341 | 17.6532 | 0.459953  | -0.654527 | 0.51277  | 0.999883  |
| gene1629 | gene1629 | SACOL1663 | gi 57650036 ref NC_002951.2 :1691824-1693559 | MR150 | M36C05 | OK | 27.3788 | 24.2027 | -0.177893 | 0.210425  | 0.83334  | 0.999883  |
| gene163  | gene163  | argC      | gi 57650036 ref NC_002951.2 :193899-194931   | MR150 | M36C05 | OK | 1.47245 | 1.98802 | 0.433118  | -0.547174 | 0.58426  | 0.999883  |
| gene1630 | gene1630 | SACOL1664 | gi 57650036 ref NC_002951.2 :1691824-1693559 | MR150 | M36C05 | OK | 17.742  | 12.1675 | -0.544134 | 0.394674  | 0.69308  | 0.999883  |
| gene1631 | gene1631 | greA      | gi 57650036 ref NC_002951.2 :1693884-1694361 | MR150 | M36C05 | OK | 225.222 | 243.519 | 0.112688  | -0.143941 | 0.88555  | 0.999883  |
| gene1632 | gene1632 | udk       | gi 57650036 ref NC_002951.2 :1694388-1696280 | MR150 | M36C05 | OK | 72.2017 | 57.2719 | -0.334206 | 0.281951  | 0.77798  | 0.999883  |
| gene1633 | gene1633 | SACOL1667 | gi 57650036 ref NC_002951.2 :1694388-1696280 | MR150 | M36C05 | OK | 51.2888 | 17.1192 | -1.58303  | 1.46828   | 0.14203  | 0.740572  |
| gene1634 | gene1634 | SACOL1668 | gi 57650036 ref NC_002951.2 :1696291-1697215 | MR150 | M36C05 | OK | 37.6465 | 13.8619 | -1.44139  | 2.06453   | 0.03897  | 0.38357   |
| gene1635 | gene1635 | SACOL1669 | gi 57650036 ref NC_002951.2 :1697217-1697856 | MR150 | M36C05 | OK | 19.1776 | 5.0283  | -1.93128  | 2.71681   | 0.00659  | 0.128232  |
| gene1636 | gene1636 | SACOL1670 | gi 57650036 ref NC_002951.2 :1698140-1698449 | MR150 | M36C05 | OK | 1313.88 | 2377.21 | 0.855436  | -0.957782 | 0.33817  | 0.999883  |
| gene1637 | gene1637 | SACOL1671 | gi 57650036 ref NC_002951.2 :1698463-1698892 | MR150 | M36C05 | OK | 315.883 | 671.415 | 1.08781   | -1.30958  | 0.19034  | 0.850301  |
| gene1638 | gene1638 | SACOL1672 | gi 57650036 ref NC_002951.2 :1698895-1699156 | MR150 | M36C05 | OK | 296.894 | 833.282 | 1.48886   | -2.00372  | 0.0451   | 0.41578   |
| gene1639 | gene1639 | alaS      | gi 57650036 ref NC_002951.2 :1699218-1701849 | MR150 | M36C05 | OK | 76.9997 | 48.8643 | -0.656072 | 0.75981   | 0.44737  | 0.999883  |
| gene164  | gene164  | rocD1     | gi 57650036 ref NC_002951.2 :194969-196154   | MR150 | M36C05 | OK | 2.17668 | 1.56702 | -0.474106 | 0.622647  | 0.53352  | 0.999883  |
| gene1640 | gene1640 | SACOL1674 | gi 57650036 ref NC_002951.2 :1702191-1704669 | MR150 | M36C05 | OK | 27.5695 | 17.6566 | -0.642863 | 0.842974  | 0.39924  | 0.999883  |
| gene1641 | gene1641 | SACOL1675 | gi 57650036 ref NC_002951.2 :1704670-1705339 | MR150 | M36C05 | OK | 34.9246 | 14.5888 | -1.25938  | 1.83589   | 0.06637  | 0.515048  |
| gene1642 | gene1642 | mnmA      | gi 57650036 ref NC_002951.2 :1705800-1706919 | MR150 | M36C05 | OK | 68.9885 | 62.0277 | -0.153443 | 0.197672  | 0.8433   | 0.999883  |
| gene1643 | gene1643 | SACOL1677 | gi 57650036 ref NC_002951.2 :1706919-1708062 | MR150 | M36C05 | OK | 38.1639 | 51.3279 | 0.427535  | -0.571885 | 0.5674   | 0.999883  |
| gene1644 | gene1644 | SACOL1678 | gi 57650036 ref NC_002951.2 :1708373-1709387 | MR150 | M36C05 | OK | 84.6558 | 219.866 | 1.37694   | -1.64752  | 0.09945  | 0.636933  |
| gene1645 | gene1645 | SACOL1679 | gi 57650036 ref NC_002951.2 :1709623-1709770 | MR150 | M36C05 | OK | 31.5869 | 2298.48 | 6.18521   | -4.89681  | 9.74E-07 | 0.0001163 |
| gene1646 | gene1646 | SACOL1680 | gi 57650036 ref NC_002951.2 :1709809-1709992 | MR150 | M36C05 | OK | 7.56139 | 348.89  | 5.52798   | -4.37753  | 1.20E-05 | 0.0009241 |

|          |          |           |                                              |       |        |    |         |         |           |           |         |           |
|----------|----------|-----------|----------------------------------------------|-------|--------|----|---------|---------|-----------|-----------|---------|-----------|
| gene1647 | gene1647 | SACOL1681 | gi 57650036 ref NC_002951.2 :1710091-1710514 | MR150 | M36C05 | OK | 152.538 | 206.01  | 0.433543  | -0.582983 | 0.5599  | 0.999883  |
| gene1648 | gene1648 | SACOL1682 | gi 57650036 ref NC_002951.2 :1710598-1711873 | MR150 | M36C05 | OK | 93.0299 | 97.1166 | 0.0620233 | -0.075042 | 0.94018 | 0.999883  |
| gene1649 | gene1649 | SACOL1683 | gi 57650036 ref NC_002951.2 :1712033-1712807 | MR150 | M36C05 | OK | 37.3423 | 13.0693 | -1.51463  | 2.19253   | 0.02834 | 0.319082  |
| gene165  | gene165  | brnQ1     | gi 57650036 ref NC_002951.2 :196406-197762   | MR150 | M36C05 | OK | 29.9419 | 11.634  | -1.36382  | 1.92259   | 0.05453 | 0.462964  |
| gene1650 | gene1650 | aspS      | gi 57650036 ref NC_002951.2 :1713267-1715034 | MR150 | M36C05 | OK | 32.4515 | 11.324  | -1.5189   | 2.08525   | 0.03705 | 0.369812  |
| gene1651 | gene1651 | hisS      | gi 57650036 ref NC_002951.2 :1715049-1716312 | MR150 | M36C05 | OK | 17.2888 | 6.0152  | -1.52315  | 2.21233   | 0.02694 | 0.309278  |
| gene1652 | gene1652 | SACOL1687 | gi 57650036 ref NC_002951.2 :1716772-1718097 | MR150 | M36C05 | OK | 52.776  | 87.7794 | 0.733999  | -0.721301 | 0.47072 | 0.999883  |
| gene1653 | gene1653 | SACOL1688 | gi 57650036 ref NC_002951.2 :1716772-1718097 | MR150 | M36C05 | OK | 70.6644 | 172.712 | 1.28931   | -0.992856 | 0.32078 | 0.999883  |
| gene1654 | gene1654 | relA2     | gi 57650036 ref NC_002951.2 :1718108-1720298 | MR150 | M36C05 | OK | 62.0397 | 105.939 | 0.771963  | -0.886429 | 0.37539 | 0.999883  |
| gene1655 | gene1655 | apt       | gi 57650036 ref NC_002951.2 :1720725-1721244 | MR150 | M36C05 | OK | 47.4813 | 23.8844 | -0.991294 | 1.44886   | 0.14738 | 0.743774  |
| gene1656 | gene1656 | recJ      | gi 57650036 ref NC_002951.2 :1721265-1723539 | MR150 | M36C05 | OK | 14.9188 | 11.2645 | -0.405349 | 0.566855  | 0.57081 | 0.999883  |
| gene1657 | gene1657 | SACOL1692 | gi 57650036 ref NC_002951.2 :1723741-1726021 | MR150 | M36C05 | OK | 93.5995 | 66.8091 | -0.486457 | 0.557347  | 0.57729 | 0.999883  |
| gene1658 | gene1658 | yajC      | gi 57650036 ref NC_002951.2 :1726295-1726556 | MR150 | M36C05 | OK | 363.543 | 289.837 | -0.326886 | 0.460911  | 0.64486 | 0.999883  |
| gene1659 | gene1659 | tgt       | gi 57650036 ref NC_002951.2 :1726574-1727714 | MR150 | M36C05 | OK | 60.7682 | 13.9579 | -2.12223  | 2.90968   | 0.00362 | 0.0872791 |
| gene166  | gene166  | entB      | gi 57650036 ref NC_002951.2 :198037-198535   | MR150 | M36C05 | OK | 13.3457 | 24.4555 | 0.873789  | -1.26617  | 0.20545 | 0.877717  |
| gene1660 | gene1660 | queA      | gi 57650036 ref NC_002951.2 :1727736-1728762 | MR150 | M36C05 | OK | 32.9998 | 11.6144 | -1.50655  | 2.15825   | 0.03091 | 0.336223  |
| gene1661 | gene1661 | ruvB      | gi 57650036 ref NC_002951.2 :1728763-1729768 | MR150 | M36C05 | OK | 50.0295 | 37.8078 | -0.404095 | 0.550377  | 0.58206 | 0.999883  |
| gene1662 | gene1662 | ruvA      | gi 57650036 ref NC_002951.2 :1729799-1730402 | MR150 | M36C05 | OK | 48.2348 | 24.1049 | -1.00075  | 1.45418   | 0.1459  | 0.743774  |
| gene1663 | gene1663 | SACOL1698 | gi 57650036 ref NC_002951.2 :1730415-1730874 | MR150 | M36C05 | OK | 23.604  | 18.3227 | -0.365396 | 0.531265  | 0.59524 | 0.999883  |
| gene1664 | gene1664 | obgE      | gi 57650036 ref NC_002951.2 :1730883-1732176 | MR150 | M36C05 | OK | 61.3725 | 47.8084 | -0.360329 | 0.464745  | 0.64211 | 0.999883  |
| gene1665 | gene1665 | rpmA      | gi 57650036 ref NC_002951.2 :1732530-1732815 | MR150 | M36C05 | OK | 1497.3  | 686.172 | -1.12572  | 1.36844   | 0.17118 | 0.816303  |
| gene1666 | gene1666 | SACOL1701 | gi 57650036 ref NC_002951.2 :1732826-1733147 | MR150 | M36C05 | OK | 201.55  | 65.371  | -1.62442  | 2.33457   | 0.01957 | 0.257448  |
| gene1667 | gene1667 | rplU      | gi 57650036 ref NC_002951.2 :1733152-1733461 | MR150 | M36C05 | OK | 651.009 | 214.899 | -1.59902  | 2.1193    | 0.03407 | 0.353699  |
| gene1668 | gene1668 | SACOL1703 | gi 57650036 ref NC_002951.2 :1733627-1735000 | MR150 | M36C05 | OK | 19.4152 | 12.343  | -0.65349  | 0.460459  | 0.64519 | 0.999883  |
| gene1669 | gene1669 | mreC      | gi 57650036 ref NC_002951.2 :1733627-1735000 | MR150 | M36C05 | OK | 29.7656 | 20.4137 | -0.544108 | 0.674165  | 0.50021 | 0.999883  |
| gene167  | gene167  | ipdC      | gi 57650036 ref NC_002951.2 :198661-200302   | MR150 | M36C05 | OK | 10.2038 | 26.9242 | 1.39979   | -1.95782  | 0.05025 | 0.441055  |
| gene1670 | gene1670 | SACOL1705 | gi 57650036 ref NC_002951.2 :1735392-1735866 | MR150 | M36C05 | OK | 31.2492 | 38.6788 | 0.307725  | -0.452232 | 0.6511  | 0.999883  |
| gene1671 | gene1671 | SACOL1706 | gi 57650036 ref NC_002951.2 :1736339-1736624 | MR150 | M36C05 | OK | 246.878 | 124.549 | -0.987084 | 1.42162   | 0.15514 | 0.769852  |
| gene1672 | gene1672 | radC      | gi 57650036 ref NC_002951.2 :1736691-1738082 | MR150 | M36C05 | OK | 6.60121 | 3.17227 | -1.05721  | 1.08297   | 0.27882 | 0.965014  |
| gene1673 | gene1673 | SACOL1708 | gi 57650036 ref NC_002951.2 :1736691-1738082 | MR150 | M36C05 | OK | 5.1231  | 3.25812 | -0.652975 | 0.647957  | 0.51701 | 0.999883  |
| gene1674 | gene1674 | folC      | gi 57650036 ref NC_002951.2 :1738351-1739623 | MR150 | M36C05 | OK | 53.7168 | 55.8416 | 0.055966  | -0.072292 | 0.94237 | 0.999883  |
| gene1675 | gene1675 | valS      | gi 57650036 ref NC_002951.2 :1739635-1742266 | MR150 | M36C05 | OK | 53.6856 | 67.857  | 0.337964  | -0.392039 | 0.69503 | 0.999883  |
| gene1676 | gene1676 | SACOL1711 | gi 57650036 ref NC_002951.2 :1742668-1743229 | MR150 | M36C05 | OK | 108.101 | 103.681 | -0.060226 | 0.081296  | 0.93521 | 0.999883  |

|          |          |           |                                              |       |        |        |         |         |            |           |         |           |
|----------|----------|-----------|----------------------------------------------|-------|--------|--------|---------|---------|------------|-----------|---------|-----------|
| gene1677 | gene1677 | SACOL1712 | gi 57650036 ref NC_002951.2 :1743451-1744525 | MR150 | M36C05 | OK     | 37.8464 | 65.0983 | 0.782464   | -1.04209  | 0.29737 | 0.9791    |
| gene1678 | gene1678 | hemL1     | gi 57650036 ref NC_002951.2 :1744720-1746007 | MR150 | M36C05 | OK     | 30.4329 | 20.9937 | -0.535677  | 0.747131  | 0.45498 | 0.999883  |
| gene1679 | gene1679 | hemB      | gi 57650036 ref NC_002951.2 :1746054-1747029 | MR150 | M36C05 | OK     | 21.5369 | 17.2175 | -0.322936  | 0.469685  | 0.63858 | 0.999883  |
| gene168  | gene168  | SACOL0174 | gi 57650036 ref NC_002951.2 :200495-202621   | MR150 | M36C05 | NOTEST | 0       | 0       | 0          | 0         | 1       | 1         |
| gene1680 | gene1680 | hemD      | gi 57650036 ref NC_002951.2 :1747031-1747700 | MR150 | M36C05 | OK     | 6.20156 | 3.29425 | -0.912683  | 1.21823   | 0.22314 | 0.89446   |
| gene1681 | gene1681 | hemC      | gi 57650036 ref NC_002951.2 :1747721-1748648 | MR150 | M36C05 | OK     | 28.8556 | 8.79856 | -1.71351   | 2.47829   | 0.0132  | 0.19821   |
| gene1682 | gene1682 | SACOL1718 | gi 57650036 ref NC_002951.2 :1748689-1749505 | MR150 | M36C05 | OK     | 33.8035 | 17.7282 | -0.931126  | 1.34891   | 0.17737 | 0.821737  |
| gene1683 | gene1683 | hemA      | gi 57650036 ref NC_002951.2 :1749526-1750873 | MR150 | M36C05 | OK     | 269.988 | 288.617 | 0.096259   | -0.103179 | 0.91782 | 0.999883  |
| gene1684 | gene1684 | engB      | gi 57650036 ref NC_002951.2 :1751089-1751680 | MR150 | M36C05 | OK     | 18.7893 | 7.62321 | -1.30144   | 1.86252   | 0.06253 | 0.504373  |
| gene1685 | gene1685 | clpX      | gi 57650036 ref NC_002951.2 :1751833-1753096 | MR150 | M36C05 | OK     | 277.629 | 219.555 | -0.338575  | 0.369914  | 0.71145 | 0.999883  |
| gene1686 | gene1686 | tig       | gi 57650036 ref NC_002951.2 :1753246-1754548 | MR150 | M36C05 | OK     | 384.964 | 199.474 | -0.948519  | 1.0222    | 0.30669 | 0.991033  |
| gene1687 | gene1687 | SACOL1723 | gi 57650036 ref NC_002951.2 :1754710-1755640 | MR150 | M36C05 | OK     | 28.5274 | 21.7548 | -0.391011  | 0.563318  | 0.57322 | 0.999883  |
| gene1688 | gene1688 | SACOL1724 | gi 57650036 ref NC_002951.2 :1755658-1756267 | MR150 | M36C05 | OK     | 23.5768 | 26.4495 | 0.165871   | -0.24369  | 0.80747 | 0.999883  |
| gene1689 | gene1689 | rplT      | gi 57650036 ref NC_002951.2 :1756408-1756765 | MR150 | M36C05 | OK     | 428.628 | 64.9686 | -2.72191   | 3.69683   | 0.00022 | 0.0105329 |
| gene169  | gene169  | SACOL0175 | gi 57650036 ref NC_002951.2 :200495-202621   | MR150 | M36C05 | OK     | 13.9399 | 11.4027 | -0.289841  | 0.410725  | 0.68127 | 0.999883  |
| gene1690 | gene1690 | rpmI      | gi 57650036 ref NC_002951.2 :1756811-1757012 | MR150 | M36C05 | OK     | 151.746 | 31.4399 | -2.27099   | 2.93743   | 0.00331 | 0.082366  |
| gene1691 | gene1691 | infC      | gi 57650036 ref NC_002951.2 :1757040-1757568 | MR150 | M36C05 | OK     | 157.672 | 33.3282 | -2.24211   | 3.09775   | 0.00195 | 0.0569023 |
| gene1692 | gene1692 | SACOL1728 | gi 57650036 ref NC_002951.2 :1757796-1759290 | MR150 | M36C05 | OK     | 12.5463 | 52.8993 | 2.07599    | -2.8043   | 0.00504 | 0.10765   |
| gene1693 | gene1693 | thrS      | gi 57650036 ref NC_002951.2 :1759715-1761653 | MR150 | M36C05 | OK     | 138.365 | 25.2379 | -2.45482   | 2.9464    | 0.00321 | 0.0816379 |
| gene1694 | gene1694 | dnaI      | gi 57650036 ref NC_002951.2 :1762065-1764386 | MR150 | M36C05 | OK     | 112.772 | 87.0361 | -0.373725  | 0.287726  | 0.77356 | 0.999883  |
| gene1695 | gene1695 | SACOL1732 | gi 57650036 ref NC_002951.2 :1762065-1764386 | MR150 | M36C05 | OK     | 74.9839 | 70.8581 | -0.0816478 | 0.069555  | 0.94455 | 0.999883  |
| gene1696 | gene1696 | nrdR      | gi 57650036 ref NC_002951.2 :1764386-1764857 | MR150 | M36C05 | OK     | 186.172 | 177.195 | -0.0713012 | 0.093801  | 0.92527 | 0.999883  |
| gene1697 | gene1697 | gapA2     | gi 57650036 ref NC_002951.2 :1765066-1766092 | MR150 | M36C05 | OK     | 777.35  | 524.249 | -0.568312  | 0.588322  | 0.55632 | 0.999883  |
| gene1698 | gene1698 | coaE      | gi 57650036 ref NC_002951.2 :1766261-1766885 | MR150 | M36C05 | OK     | 80.5049 | 52.3257 | -0.621558  | 0.866377  | 0.38628 | 0.999883  |
| gene1699 | gene1699 | fpg       | gi 57650036 ref NC_002951.2 :1766900-1767773 | MR150 | M36C05 | OK     | 47.0958 | 41.1356 | -0.195209  | 0.27058   | 0.78671 | 0.999883  |
| gene17   | gene17   | purA      | gi 57650036 ref NC_002951.2 :22464-23748     | MR150 | M36C05 | OK     | 10.3137 | 5.18668 | -0.991671  | 1.45019   | 0.147   | 0.743774  |
| gene170  | gene170  | SACOL0176 | gi 57650036 ref NC_002951.2 :203206-205158   | MR150 | M36C05 | OK     | 19.6788 | 14.8137 | -0.409703  | 0.472802  | 0.63635 | 0.999883  |
| gene1700 | gene1700 | polA      | gi 57650036 ref NC_002951.2 :1767788-1770419 | MR150 | M36C05 | OK     | 55.2608 | 65.9079 | 0.254194   | -0.294857 | 0.7681  | 0.999883  |
| gene1701 | gene1701 | SACOL1738 | gi 57650036 ref NC_002951.2 :1770712-1772200 | MR150 | M36C05 | OK     | 7.61039 | 3.1665  | -1.26508   | 1.83571   | 0.0664  | 0.515048  |
| gene1702 | gene1702 | SACOL1739 | gi 57650036 ref NC_002951.2 :1772698-1775064 | MR150 | M36C05 | OK     | 113.331 | 44.765  | -1.3401    | 1.28815   | 0.19769 | 0.861357  |
| gene1703 | gene1703 | phoP      | gi 57650036 ref NC_002951.2 :1772698-1775064 | MR150 | M36C05 | OK     | 104.283 | 78.0047 | -0.418867  | 0.260067  | 0.79481 | 0.999883  |
| gene1704 | gene1704 | icd       | gi 57650036 ref NC_002951.2 :1775453-1776722 | MR150 | M36C05 | OK     | 1064.74 | 1702.54 | 0.677182   | -0.699254 | 0.48439 | 0.999883  |
| gene1705 | gene1705 | gltA      | gi 57650036 ref NC_002951.2 :1776770-1777892 | MR150 | M36C05 | OK     | 720.86  | 912.557 | 0.340195   | -0.347843 | 0.72796 | 0.999883  |

|          |          |           |                                              |       |        |        |         |         |            |           |         |           |
|----------|----------|-----------|----------------------------------------------|-------|--------|--------|---------|---------|------------|-----------|---------|-----------|
| gene1706 | gene1706 | SACOL1743 | gi 57650036 ref NC_002951.2 :1778239-1779601 | MR150 | M36C05 | OK     | 201.789 | 225.975 | 0.163317   | -0.179418 | 0.85761 | 0.999883  |
| gene1707 | gene1707 | SACOL1744 | gi 57650036 ref NC_002951.2 :1779633-1781285 | MR150 | M36C05 | NOTEST | 0.52743 | 0.835   | 0.662814   | -0.773993 | 0.43894 | 1         |
| gene1708 | gene1708 | pyk       | gi 57650036 ref NC_002951.2 :1781925-1783683 | MR150 | M36C05 | OK     | 125.05  | 112.48  | -0.152845  | 0.172971  | 0.86267 | 0.999883  |
| gene1709 | gene1709 | pfkA      | gi 57650036 ref NC_002951.2 :1783704-1784673 | MR150 | M36C05 | OK     | 48.7862 | 56.3581 | 0.208151   | -0.279391 | 0.77995 | 0.999883  |
| gene171  | gene171  | murQ      | gi 57650036 ref NC_002951.2 :203206-205158   | MR150 | M36C05 | OK     | 14.2184 | 7.87789 | -0.85188   | 0.700107  | 0.48386 | 0.999883  |
| gene1710 | gene1710 | accA      | gi 57650036 ref NC_002951.2 :1784941-1786743 | MR150 | M36C05 | OK     | 51.1792 | 26.3493 | -0.957791  | 0.923128  | 0.35594 | 0.999883  |
| gene1711 | gene1711 | accD      | gi 57650036 ref NC_002951.2 :1784941-1786743 | MR150 | M36C05 | OK     | 47.9361 | 25.8147 | -0.892919  | 0.790976  | 0.42896 | 0.999883  |
| gene1712 | gene1712 | SACOL1749 | gi 57650036 ref NC_002951.2 :1786937-1788167 | MR150 | M36C05 | OK     | 37.0231 | 23.6549 | -0.646285  | 0.892003  | 0.37239 | 0.999883  |
| gene1713 | gene1713 | dnaE      | gi 57650036 ref NC_002951.2 :1788616-1791814 | MR150 | M36C05 | OK     | 59.0155 | 27.8958 | -1.08104   | 1.28092   | 0.20022 | 0.868707  |
| gene1714 | gene1714 | SACOL1751 | gi 57650036 ref NC_002951.2 :1791834-1792776 | MR150 | M36C05 | OK     | 69.7529 | 37.1573 | -0.908608  | 1.22711   | 0.21978 | 0.89416   |
| gene1715 | gene1715 | SACOL1752 | gi 57650036 ref NC_002951.2 :1793036-1794335 | MR150 | M36C05 | OK     | 37.0685 | 36.513  | -0.0217822 | 0.029228  | 0.97668 | 0.999883  |
| gene1716 | gene1716 | SACOL1753 | gi 57650036 ref NC_002951.2 :1794539-1794953 | MR150 | M36C05 | OK     | 564.035 | 361.602 | -0.641383  | 0.780495  | 0.4351  | 0.999883  |
| gene1717 | gene1717 | SACOL1754 | gi 57650036 ref NC_002951.2 :1795257-1795946 | MR150 | M36C05 | OK     | 58.2289 | 237.171 | 2.02612    | -2.59391  | 0.00949 | 0.161634  |
| gene1718 | gene1718 | pepQ      | gi 57650036 ref NC_002951.2 :1796120-1797176 | MR150 | M36C05 | OK     | 35.2429 | 42.7666 | 0.279155   | -0.382341 | 0.70221 | 0.999883  |
| gene1719 | gene1719 | SACOL1757 | gi 57650036 ref NC_002951.2 :1797269-1797368 | MR150 | M36C05 | NOTEST | 0       | 0       | 0          | 0         | 1       | 1         |
| gene172  | gene172  | SACOL0178 | gi 57650036 ref NC_002951.2 :205169-206624   | MR150 | M36C05 | OK     | 23.1873 | 16.6005 | -0.48211   | 0.679305  | 0.49694 | 0.999883  |
| gene1720 | gene1720 | ald2      | gi 57650036 ref NC_002951.2 :1797491-1798610 | MR150 | M36C05 | OK     | 318.613 | 75.3451 | -2.08022   | 2.4201    | 0.01552 | 0.219316  |
| gene1721 | gene1721 | SACOL1759 | gi 57650036 ref NC_002951.2 :1798750-1799251 | MR150 | M36C05 | OK     | 1138.87 | 1668.79 | 0.5512     | -0.578783 | 0.56274 | 0.999883  |
| gene1722 | gene1722 | ackA      | gi 57650036 ref NC_002951.2 :1799496-1800699 | MR150 | M36C05 | OK     | 224.299 | 157.845 | -0.506918  | 0.572442  | 0.56702 | 0.999883  |
| gene1723 | gene1723 | SACOL1761 | gi 57650036 ref NC_002951.2 :1800786-1801734 | MR150 | M36C05 | OK     | 106.861 | 202.134 | 0.919575   | -1.10235  | 0.27031 | 0.953794  |
| gene1724 | gene1724 | tpx       | gi 57650036 ref NC_002951.2 :1801856-1802351 | MR150 | M36C05 | OK     | 773.593 | 973.56  | 0.331695   | -0.363285 | 0.71639 | 0.999883  |
| gene1725 | gene1725 | SACOL1763 | gi 57650036 ref NC_002951.2 :1802448-1803219 | MR150 | M36C05 | OK     | 9.65271 | 4.83017 | -0.99886   | 1.41815   | 0.15615 | 0.771878  |
| gene1726 | gene1726 | thiI      | gi 57650036 ref NC_002951.2 :1803262-1805625 | MR150 | M36C05 | OK     | 9.57172 | 5.59851 | -0.773736  | 0.875832  | 0.38112 | 0.999883  |
| gene1727 | gene1727 | SACOL1765 | gi 57650036 ref NC_002951.2 :1803262-1805625 | MR150 | M36C05 | OK     | 7.16837 | 3.87068 | -0.889057  | 0.818114  | 0.41329 | 0.999883  |
| gene1728 | gene1728 | SACOL1766 | gi 57650036 ref NC_002951.2 :1805782-1805923 | MR150 | M36C05 | NOTEST | 0       | 0       | 0          | 0         | 1       | 1         |
| gene1729 | gene1729 | SACOL1767 | gi 57650036 ref NC_002951.2 :1805996-1807691 | MR150 | M36C05 | OK     | 127.245 | 130.05  | 0.0314605  | -0.035456 | 0.97172 | 0.999883  |
| gene173  | gene173  | SACOL0179 | gi 57650036 ref NC_002951.2 :206626-207502   | MR150 | M36C05 | OK     | 16.082  | 11.0948 | -0.535562  | 0.786443  | 0.43161 | 0.999883  |
| gene1730 | gene1730 | SACOL1768 | gi 57650036 ref NC_002951.2 :1807827-1808292 | MR150 | M36C05 | OK     | 10.3831 | 9.99649 | -0.0547499 | 0.075711  | 0.93965 | 0.999883  |
| gene1731 | gene1731 | rpsD      | gi 57650036 ref NC_002951.2 :1808535-1809138 | MR150 | M36C05 | OK     | 412.464 | 66.8362 | -2.62557   | 3.28932   | 0.001   | 0.0347762 |
| gene1732 | gene1732 | SACOL1770 | gi 57650036 ref NC_002951.2 :1809353-1810097 | MR150 | M36C05 | OK     | 2.53287 | 2.23092 | -0.183129  | 0.227782  | 0.81982 | 0.999883  |
| gene1733 | gene1733 | SACOL1771 | gi 57650036 ref NC_002951.2 :1810176-1810623 | MR150 | M36C05 | OK     | 12.3698 | 66.1029 | 2.41789    | -3.44409  | 0.00057 | 0.0226599 |
| gene1734 | gene1734 | SACOL1772 | gi 57650036 ref NC_002951.2 :1810736-1813488 | MR150 | M36C05 | OK     | 11.1551 | 51.3982 | 2.20401    | -1.79655  | 0.07241 | 0.527706  |
| gene1735 | gene1735 | serA      | gi 57650036 ref NC_002951.2 :1810736-1813488 | MR150 | M36C05 | OK     | 13.4086 | 44.2459 | 1.72239    | -1.69381  | 0.0903  | 0.602864  |



|          |          |           |                                              |       |        |        |         |         |            |           |          |           |
|----------|----------|-----------|----------------------------------------------|-------|--------|--------|---------|---------|------------|-----------|----------|-----------|
| gene1736 | gene1736 | SACOL1774 | gi 57650036 ref NC_002951.2 :1813637-1814768 | MR150 | M36C05 | OK     | 34.8723 | 46.8976 | 0.427435   | -0.577796 | 0.5634   | 0.999883  |
| gene1737 | gene1737 | SACOL1775 | gi 57650036 ref NC_002951.2 :1814874-1816341 | MR150 | M36C05 | OK     | 35.056  | 16.5301 | -1.08456   | 1.49295   | 0.13545  | 0.730357  |
| gene1738 | gene1738 | SACOL1776 | gi 57650036 ref NC_002951.2 :1816468-1817086 | MR150 | M36C05 | OK     | 46.8717 | 14.2598 | -1.71676   | 2.48607   | 0.01292  | 0.195099  |
| gene1739 | gene1739 | SACOL1777 | gi 57650036 ref NC_002951.2 :1817257-1818532 | MR150 | M36C05 | OK     | 30.7725 | 51.9938 | 0.756696   | -1.00878  | 0.31308  | 0.994633  |
| gene174  | gene174  | SACOL0180 | gi 57650036 ref NC_002951.2 :208189-210979   | MR150 | M36C05 | OK     | 15.4365 | 8.29628 | -0.895806  | 1.23916   | 0.21529  | 0.89416   |
| gene1740 | gene1740 | tyrS      | gi 57650036 ref NC_002951.2 :1818625-1819888 | MR150 | M36C05 | OK     | 23.1958 | 5.80778 | -1.9978    | 2.86861   | 0.00412  | 0.0948257 |
| gene1741 | gene1741 | SACOL1779 | gi 57650036 ref NC_002951.2 :1820269-1821175 | MR150 | M36C05 | OK     | 20.8211 | 15.3093 | -0.443642  | 0.648593  | 0.5166   | 0.999883  |
| gene1742 | gene1742 | SACOL1781 | gi 57650036 ref NC_002951.2 :1821377-1824065 | MR150 | M36C05 | OK     | 5.3564  | 4.20753 | -0.34829   | 0.510182  | 0.60992  | 0.999883  |
| gene1743 | gene1743 | fhs       | gi 57650036 ref NC_002951.2 :1824398-1826066 | MR150 | M36C05 | OK     | 402.735 | 226.371 | -0.831146  | 0.870703  | 0.38392  | 0.999883  |
| gene1744 | gene1744 | acs       | gi 57650036 ref NC_002951.2 :1826505-1828212 | MR150 | M36C05 | OK     | 370.87  | 834.789 | 1.1705     | -1.203    | 0.22898  | 0.898537  |
| gene1745 | gene1745 | acuA      | gi 57650036 ref NC_002951.2 :1828380-1829013 | MR150 | M36C05 | OK     | 68.9347 | 52.2556 | -0.399646  | 0.56067   | 0.57502  | 0.999883  |
| gene1746 | gene1746 | acuC      | gi 57650036 ref NC_002951.2 :1829037-1830207 | MR150 | M36C05 | OK     | 74.8355 | 51.4892 | -0.539454  | 0.693986  | 0.48769  | 0.999883  |
| gene1747 | gene1747 | ccpA      | gi 57650036 ref NC_002951.2 :1830304-1831294 | MR150 | M36C05 | OK     | 320.993 | 321.054 | 0.0002725  | -0.000299 | 0.99976  | 0.999883  |
| gene1748 | gene1748 | SACOL1787 | gi 57650036 ref NC_002951.2 :1831833-1832925 | MR150 | M36C05 | OK     | 58.1998 | 126.084 | 1.11529    | -1.39252  | 0.16377  | 0.793541  |
| gene1749 | gene1749 | SACOL1788 | gi 57650036 ref NC_002951.2 :1833624-1835142 | MR150 | M36C05 | OK     | 66.0053 | 361.875 | 2.45484    | -2.75839  | 0.00581  | 0.118414  |
| gene175  | gene175  | SACOL0181 | gi 57650036 ref NC_002951.2 :211183-212026   | MR150 | M36C05 | OK     | 54.7686 | 35.6811 | -0.618192  | 0.859089  | 0.39029  | 0.999883  |
| gene1750 | gene1750 | SACOL1789 | gi 57650036 ref NC_002951.2 :1835215-1835707 | MR150 | M36C05 | OK     | 383.945 | 2228.77 | 2.53728    | -2.79327  | 0.00522  | 0.110421  |
| gene1751 | gene1751 | murC      | gi 57650036 ref NC_002951.2 :1835780-1837094 | MR150 | M36C05 | OK     | 94.1734 | 59.2763 | -0.667864  | 0.827488  | 0.40796  | 0.999883  |
| gene1752 | gene1752 | SACOL1791 | gi 57650036 ref NC_002951.2 :1837117-1840942 | MR150 | M36C05 | OK     | 53.7532 | 33.3127 | -0.690278  | 0.796954  | 0.42548  | 0.999883  |
| gene1753 | gene1753 | SACOL1792 | gi 57650036 ref NC_002951.2 :1840962-1841559 | MR150 | M36C05 | OK     | 37.0114 | 19.4646 | -0.927112  | 1.35599   | 0.1751   | 0.821477  |
| gene1754 | gene1754 | SACOL1793 | gi 57650036 ref NC_002951.2 :1841587-1842445 | MR150 | M36C05 | OK     | 42.8167 | 19.6125 | -1.1264    | 1.60679   | 0.1081   | 0.653986  |
| gene1755 | gene1755 | SACOL1794 | gi 57650036 ref NC_002951.2 :1842544-1842856 | MR150 | M36C05 | OK     | 173.933 | 223.179 | 0.359667   | -0.509348 | 0.61051  | 0.999883  |
| gene1756 | gene1756 | pepA1     | gi 57650036 ref NC_002951.2 :1842920-1843997 | MR150 | M36C05 | OK     | 92.3718 | 92.5355 | 0.00255504 | -0.003179 | 0.99746  | 0.999883  |
| gene1757 | gene1757 | SACOL1796 | gi 57650036 ref NC_002951.2 :1844083-1844395 | MR150 | M36C05 | OK     | 436.766 | 396.143 | -0.14084   | 0.185216  | 0.85306  | 0.999883  |
| gene1758 | gene1758 | SACOL1797 | gi 57650036 ref NC_002951.2 :1844519-1845296 | MR150 | M36C05 | OK     | 22.8196 | 30.5912 | 0.42284    | -0.614302 | 0.53902  | 0.999883  |
| gene1759 | gene1759 | trmB      | gi 57650036 ref NC_002951.2 :1845831-1846476 | MR150 | M36C05 | OK     | 130.371 | 73.6615 | -0.82364   | 1.09622   | 0.27298  | 0.958372  |
| gene176  | gene176  | SACOL0182 | gi 57650036 ref NC_002951.2 :212027-214050   | MR150 | M36C05 | NOTEST | 0       | 0       | 0          | 0         | 1        | 1         |
| gene1760 | gene1760 | SACOL1799 | gi 57650036 ref NC_002951.2 :1846490-1847282 | MR150 | M36C05 | OK     | 135.003 | 94.8487 | -0.509286  | 0.647534  | 0.51729  | 0.999883  |
| gene1761 | gene1761 | dat       | gi 57650036 ref NC_002951.2 :1847831-1848680 | MR150 | M36C05 | OK     | 120.321 | 144.462 | 0.263798   | -0.326075 | 0.74437  | 0.999883  |
| gene1762 | gene1762 | SACOL1801 | gi 57650036 ref NC_002951.2 :1848683-1850093 | MR150 | M36C05 | OK     | 68.9836 | 104.949 | 0.605369   | -0.731501 | 0.46447  | 0.999883  |
| gene1763 | gene1763 | SACOL1802 | gi 57650036 ref NC_002951.2 :1851012-1851435 | MR150 | M36C05 | OK     | 26.6771 | 226.759 | 3.08749    | -4.26223  | 2.02E-05 | 0.0014283 |
| gene1764 | gene1764 | SACOL1803 | gi 57650036 ref NC_002951.2 :1851451-1853805 | MR150 | M36C05 | OK     | 33.0249 | 15.3506 | -1.10526   | 0.679548  | 0.49679  | 0.999883  |
| gene1765 | gene1765 | SACOL1804 | gi 57650036 ref NC_002951.2 :1851451-1853805 | MR150 | M36C05 | OK     | 37.5054 | 19.4506 | -0.947286  | 1.09363   | 0.27412  | 0.958813  |

|          |          |           |                                              |       |        |        |         |         |           |           |         |           |
|----------|----------|-----------|----------------------------------------------|-------|--------|--------|---------|---------|-----------|-----------|---------|-----------|
| gene1766 | gene1766 | SACOL1805 | gi 57650036 ref NC_002951.2 :1854211-1855480 | MR150 | M36C05 | OK     | 17.335  | 8.35336 | -1.05326  | 1.53294   | 0.12529 | 0.701256  |
| gene1767 | gene1767 | SACOL1806 | gi 57650036 ref NC_002951.2 :1855596-1862157 | MR150 | M36C05 | OK     | 2.38426 | 2.80577 | 0.234855  | -0.340254 | 0.73367 | 0.999883  |
| gene1768 | gene1768 | SACOL1807 | gi 57650036 ref NC_002951.2 :1862482-1862794 | MR150 | M36C05 | OK     | 29.6331 | 7.4393  | -1.99397  | 2.51941   | 0.01176 | 0.184977  |
| gene1769 | gene1769 | leuS      | gi 57650036 ref NC_002951.2 :1862815-1865233 | MR150 | M36C05 | OK     | 19.2681 | 11.1788 | -0.785454 | 1.07654   | 0.28169 | 0.965951  |
| gene177  | gene177  | SACOL0183 | gi 57650036 ref NC_002951.2 :212027-214050   | MR150 | M36C05 | NOTEST | 0       | 0       | 0         | 0         | 1       | 1         |
| gene1770 | gene1770 | SACOL1809 | gi 57650036 ref NC_002951.2 :1865520-1866702 | MR150 | M36C05 | OK     | 30.4107 | 8.30816 | -1.87198  | 2.66894   | 0.00761 | 0.141199  |
| gene1771 | gene1771 | SACOL1810 | gi 57650036 ref NC_002951.2 :1866811-1868325 | MR150 | M36C05 | OK     | 30.2599 | 52.3614 | 0.791097  | -0.858579 | 0.39057 | 0.999883  |
| gene1772 | gene1772 | SACOL1811 | gi 57650036 ref NC_002951.2 :1866811-1868325 | MR150 | M36C05 | OK     | 25.6466 | 61.8771 | 1.27064   | -0.961462 | 0.33632 | 0.999883  |
| gene1773 | gene1773 | rot       | gi 57650036 ref NC_002951.2 :1868444-1868945 | MR150 | M36C05 | OK     | 213.951 | 681.236 | 1.67087   | -1.99043  | 0.04654 | 0.424224  |
| gene1774 | gene1774 | SACOL1813 | gi 57650036 ref NC_002951.2 :1869365-1870078 | MR150 | M36C05 | OK     | 0.89527 | 2.79614 | 1.64304   | -1.79848  | 0.0721  | 0.527706  |
| gene1775 | gene1775 | SACOL1814 | gi 57650036 ref NC_002951.2 :1870424-1871252 | MR150 | M36C05 | OK     | 110.202 | 116.454 | 0.0796108 | -0.100612 | 0.91986 | 0.999883  |
| gene1776 | gene1776 | SACOL1815 | gi 57650036 ref NC_002951.2 :1871254-1871374 | MR150 | M36C05 | NOTEST | 0       | 0       | 0         | 0         | 1       | 1         |
| gene1777 | gene1777 | putA      | gi 57650036 ref NC_002951.2 :1871485-1872487 | MR150 | M36C05 | OK     | 117.236 | 125.948 | 0.103416  | -0.125844 | 0.89986 | 0.999883  |
| gene1778 | gene1778 | ribH      | gi 57650036 ref NC_002951.2 :1872608-1873073 | MR150 | M36C05 | OK     | 8.07578 | 7.08085 | -0.189679 | 0.252955  | 0.8003  | 0.999883  |
| gene1779 | gene1779 | ribBA     | gi 57650036 ref NC_002951.2 :1873085-1874267 | MR150 | M36C05 | OK     | 4.36666 | 7.85907 | 0.847827  | -1.23214  | 0.2179  | 0.89416   |
| gene178  | gene178  | SACOL0184 | gi 57650036 ref NC_002951.2 :214314-215907   | MR150 | M36C05 | OK     | 9.67574 | 6.0136  | -0.686142 | 1.00542   | 0.31469 | 0.998438  |
| gene1780 | gene1780 | ribE      | gi 57650036 ref NC_002951.2 :1874277-1874910 | MR150 | M36C05 | OK     | 4.24214 | 5.60792 | 0.402674  | -0.540197 | 0.58906 | 0.999883  |
| gene1781 | gene1781 | ribD      | gi 57650036 ref NC_002951.2 :1874916-1875960 | MR150 | M36C05 | OK     | 3.81024 | 10.5825 | 1.47373   | -2.11854  | 0.03413 | 0.353769  |
| gene1782 | gene1782 | SACOL1821 | gi 57650036 ref NC_002951.2 :1876440-1877943 | MR150 | M36C05 | OK     | 3.64386 | 21.4872 | 2.55994   | -3.63381  | 0.00028 | 0.0127915 |
| gene1783 | gene1783 | arsR      | gi 57650036 ref NC_002951.2 :1878465-1880072 | MR150 | M36C05 | OK     | 23.9427 | 20.9241 | -0.194425 | 0.14525   | 0.88451 | 0.999883  |
| gene1784 | gene1784 | arsB      | gi 57650036 ref NC_002951.2 :1878465-1880072 | MR150 | M36C05 | OK     | 8.68744 | 5.64825 | -0.621127 | 0.781792  | 0.43434 | 0.999883  |
| gene1785 | gene1785 | arsC      | gi 57650036 ref NC_002951.2 :1880089-1880485 | MR150 | M36C05 | OK     | 7.75603 | 9.52357 | 0.296184  | -0.385348 | 0.69998 | 0.999883  |
| gene1786 | gene1786 | SACOL1825 | gi 57650036 ref NC_002951.2 :1880779-1881634 | MR150 | M36C05 | OK     | 247.089 | 233.061 | -0.084324 | 0.097079  | 0.92266 | 0.999883  |
| gene1787 | gene1787 | SACOL1826 | gi 57650036 ref NC_002951.2 :1881909-1882134 | MR150 | M36C05 | OK     | 235.556 | 136.575 | -0.786373 | 1.15285   | 0.24897 | 0.922459  |
| gene1788 | gene1788 | SACOL1827 | gi 57650036 ref NC_002951.2 :1882332-1882803 | MR150 | M36C05 | OK     | 12.4115 | 8.96158 | -0.469851 | 0.652529  | 0.51406 | 0.999883  |
| gene1789 | gene1789 | SACOL1828 | gi 57650036 ref NC_002951.2 :1882915-1883789 | MR150 | M36C05 | OK     | 15.0242 | 22.1518 | 0.560139  | -0.398688 | 0.69012 | 0.999883  |
| gene179  | gene179  | SACOL0185 | gi 57650036 ref NC_002951.2 :216034-217342   | MR150 | M36C05 | OK     | 5.2525  | 5.77071 | 0.135746  | -0.198414 | 0.84272 | 0.999883  |
| gene1790 | gene1790 | SACOL1829 | gi 57650036 ref NC_002951.2 :1882915-1883789 | MR150 | M36C05 | OK     | 45.6985 | 69.1679 | 0.597955  | -0.747549 | 0.45473 | 0.999883  |
| gene1791 | gene1791 | SACOL1830 | gi 57650036 ref NC_002951.2 :1884084-1884720 | MR150 | M36C05 | OK     | 4.21297 | 3.79722 | -0.149895 | 0.195973  | 0.84463 | 0.999883  |
| gene1792 | gene1792 | tal       | gi 57650036 ref NC_002951.2 :1885159-1885873 | MR150 | M36C05 | OK     | 294.567 | 1026.97 | 1.80173   | -1.96284  | 0.04967 | 0.437791  |
| gene1793 | gene1793 | crcB      | gi 57650036 ref NC_002951.2 :1886612-1887406 | MR150 | M36C05 | OK     | 5.00806 | 12.2061 | 1.28528   | -1.28892  | 0.19743 | 0.861278  |
| gene1794 | gene1794 | SACOL1833 | gi 57650036 ref NC_002951.2 :1886612-1887406 | MR150 | M36C05 | OK     | 10.7134 | 11.2572 | 0.0714399 | -0.068215 | 0.94561 | 0.999883  |
| gene1795 | gene1795 | SACOL1834 | gi 57650036 ref NC_002951.2 :1887816-1889426 | MR150 | M36C05 | NOTEST | 0.10863 | 0.46903 | 2.11031   | -1.5752   | 0.11521 | 1         |

|          |          |             |                                              |       |        |        |         |         |            |           |         |          |
|----------|----------|-------------|----------------------------------------------|-------|--------|--------|---------|---------|------------|-----------|---------|----------|
| gene1796 | gene1796 | SACOL1835   | gi 57650036 ref NC_002951.2 :1889488-1890322 | MR150 | M36C05 | OK     | 39.848  | 65.7652 | 0.722818   | -0.991261 | 0.32156 | 0.999883 |
| gene1797 | gene1797 | SACOL1836   | gi 57650036 ref NC_002951.2 :1890533-1891442 | MR150 | M36C05 | OK     | 135.413 | 102.044 | -0.40817   | 0.506002  | 0.61286 | 0.999883 |
| gene1798 | gene1798 | metK        | gi 57650036 ref NC_002951.2 :1891566-1892760 | MR150 | M36C05 | OK     | 39.1338 | 14.3081 | -1.45158   | 2.03102   | 0.04225 | 0.400763 |
| gene1799 | gene1799 | pckA        | gi 57650036 ref NC_002951.2 :1893130-1894723 | MR150 | M36C05 | OK     | 558.994 | 397.927 | -0.49033   | 0.503228  | 0.6148  | 0.999883 |
| gene18   | gene18   | SACOL_tRNA- | gi 57650036 ref NC_002951.2 :24177-24252     | MR150 | M36C05 | NOTEST | 0       | 0       | 0          | 0         | 1       | 1        |
| gene180  | gene180  | SACOL0186   | gi 57650036 ref NC_002951.2 :217347-218511   | MR150 | M36C05 | OK     | 3.97158 | 3.8886  | -0.0304602 | 0.04342   | 0.96537 | 0.999883 |
| gene1800 | gene1800 | SACOL1839   | gi 57650036 ref NC_002951.2 :1894858-1895344 | MR150 | M36C05 | OK     | 114.434 | 219.28  | 0.938263   | -1.24317  | 0.21381 | 0.89416  |
| gene1801 | gene1801 | SACOL1840   | gi 57650036 ref NC_002951.2 :1895718-1896949 | MR150 | M36C05 | OK     | 8.84832 | 5.02338 | -0.816746  | 0.913532  | 0.36096 | 0.999883 |
| gene1802 | gene1802 | SACOL1841   | gi 57650036 ref NC_002951.2 :1895718-1896949 | MR150 | M36C05 | OK     | 12.015  | 7.49176 | -0.681453  | 0.637472  | 0.52382 | 0.999883 |
| gene1803 | gene1803 | SACOL1842   | gi 57650036 ref NC_002951.2 :1897008-1898264 | MR150 | M36C05 | OK     | 798.797 | 611.902 | -0.384529  | 0.403249  | 0.68677 | 0.999883 |
| gene1804 | gene1804 | SACOL1843   | gi 57650036 ref NC_002951.2 :1897008-1898264 | MR150 | M36C05 | OK     | 27.495  | 28.3245 | 0.042883   | -0.029559 | 0.97642 | 0.999883 |
| gene1805 | gene1805 | SACOL1844   | gi 57650036 ref NC_002951.2 :1898268-1899747 | MR150 | M36C05 | OK     | 20.3573 | 28.8716 | 0.504103   | -0.694985 | 0.48707 | 0.999883 |
| gene1806 | gene1806 | SACOL1845   | gi 57650036 ref NC_002951.2 :1899905-1900388 | MR150 | M36C05 | OK     | 10.8075 | 7.80274 | -0.469983  | 0.646161  | 0.51818 | 0.999883 |
| gene1807 | gene1807 | SACOL1846   | gi 57650036 ref NC_002951.2 :1900663-1901314 | MR150 | M36C05 | OK     | 143.912 | 312.009 | 1.1164     | -1.35929  | 0.17406 | 0.821477 |
| gene1808 | gene1808 | SACOL1847   | gi 57650036 ref NC_002951.2 :1901394-1902390 | MR150 | M36C05 | OK     | 264.325 | 489.03  | 0.88761    | -0.961795 | 0.33615 | 0.999883 |
| gene1809 | gene1809 | SACOL1848   | gi 57650036 ref NC_002951.2 :1902465-1903092 | MR150 | M36C05 | OK     | 11.1127 | 3.36042 | -1.7255    | 2.32561   | 0.02004 | 0.260836 |
| gene181  | gene181  | SACOL0187   | gi 57650036 ref NC_002951.2 :218527-220303   | MR150 | M36C05 | OK     | 3.30437 | 2.23787 | -0.562249  | 0.80677   | 0.4198  | 0.999883 |
| gene1810 | gene1810 | SACOL1849   | gi 57650036 ref NC_002951.2 :1903132-1903477 | MR150 | M36C05 | OK     | 10.2899 | 2.23011 | -2.20604   | 2.27576   | 0.02286 | 0.287725 |
| gene1811 | gene1811 | SACOL1850   | gi 57650036 ref NC_002951.2 :1903574-1904126 | MR150 | M36C05 | OK     | 7.39066 | 2.82307 | -1.38844   | 1.76027   | 0.07836 | 0.55661  |
| gene1812 | gene1812 | SACOL1851   | gi 57650036 ref NC_002951.2 :1904343-1904985 | MR150 | M36C05 | OK     | 6.23375 | 6.24263 | 0.00205293 | -0.002845 | 0.99773 | 0.999883 |
| gene1813 | gene1813 | SACOL1853   | gi 57650036 ref NC_002951.2 :1905285-1905462 | MR150 | M36C05 | NOTEST | 0       | 0       | 0          | 0         | 1       | 1        |
| gene1814 | gene1814 | SACOL1854   | gi 57650036 ref NC_002951.2 :1905472-1905856 | MR150 | M36C05 | OK     | 16.4821 | 21.4291 | 0.378672   | -0.535854 | 0.59206 | 0.999883 |
| gene1815 | gene1815 | SACOL1855   | gi 57650036 ref NC_002951.2 :1905957-1906735 | MR150 | M36C05 | OK     | 11.3901 | 16.0325 | 0.493223   | -0.723938 | 0.4691  | 0.999883 |
| gene1816 | gene1816 | SACOL1857   | gi 57650036 ref NC_002951.2 :1907605-1907983 | MR150 | M36C05 | OK     | 7.65471 | 5.52918 | -0.469282  | 0.571515  | 0.56765 | 0.999883 |
| gene1817 | gene1817 | SACOL1858   | gi 57650036 ref NC_002951.2 :1908503-1909064 | MR150 | M36C05 | OK     | 2.54355 | 6.11687 | 1.26595    | -1.57666  | 0.11487 | 0.670749 |
| gene1818 | gene1818 | SACOL1859   | gi 57650036 ref NC_002951.2 :1909268-1912319 | MR150 | M36C05 | OK     | 1.88054 | 1.19812 | -0.65038   | 0.932554  | 0.35105 | 0.999883 |
| gene1819 | gene1819 | SACOL1860   | gi 57650036 ref NC_002951.2 :1912385-1912616 | MR150 | M36C05 | NOTEST | 0       | 0       | 0          | 0         | 1       | 1        |
| gene182  | gene182  | ggt         | gi 57650036 ref NC_002951.2 :220340-222347   | MR150 | M36C05 | OK     | 3.39064 | 4.26924 | 0.332424   | -0.48724  | 0.62609 | 0.999883 |
| gene1820 | gene1820 | hsdS        | gi 57650036 ref NC_002951.2 :1913465-1916214 | MR150 | M36C05 | OK     | 5.9727  | 7.82774 | 0.390211   | -0.287078 | 0.77405 | 0.999883 |
| gene1821 | gene1821 | hsdM2       | gi 57650036 ref NC_002951.2 :1913465-1916214 | MR150 | M36C05 | OK     | 12.3026 | 14.6208 | 0.249065   | -0.298952 | 0.76498 | 0.999883 |
| gene1822 | gene1822 | SACOL1863   | gi 57650036 ref NC_002951.2 :1916377-1916512 | MR150 | M36C05 | NOTEST | 0       | 0       | 0          | 0         | 1       | 1        |
| gene1823 | gene1823 | SACOL1864   | gi 57650036 ref NC_002951.2 :1916576-1917296 | MR150 | M36C05 | OK     | 0.88323 | 1.27312 | 0.527516   | -0.539688 | 0.58941 | 0.999883 |
| gene1824 | gene1824 | SACOL1865   | gi 57650036 ref NC_002951.2 :1917446-1918163 | MR150 | M36C05 | OK     | 1.18447 | 0.64026 | -0.887502  | 0.852389  | 0.394   | 0.999883 |

|          |          |             |                                              |       |        |        |         |         |           |           |          |           |
|----------|----------|-------------|----------------------------------------------|-------|--------|--------|---------|---------|-----------|-----------|----------|-----------|
| gene1825 | gene1825 | SACOL1866   | gi 57650036 ref NC_002951.2 :1918320-1919040 | MR150 | M36C05 | NOTEST | 0.58882 | 0.63656 | 0.112478  | -0.098029 | 0.92191  | 1         |
| gene1826 | gene1826 | splC        | gi 57650036 ref NC_002951.2 :1919160-1919880 | MR150 | M36C05 | OK     | 0.58882 | 1.06094 | 0.849444  | -0.790196 | 0.42941  | 0.999883  |
| gene1827 | gene1827 | splB        | gi 57650036 ref NC_002951.2 :1919937-1920660 | MR150 | M36C05 | OK     | 0.29272 | 1.89871 | 2.69742   | -2.05601  | 0.03978  | 0.388526  |
| gene1828 | gene1828 | splA        | gi 57650036 ref NC_002951.2 :1920784-1921501 | MR150 | M36C05 | OK     | 0.59223 | 1.28052 | 1.1125    | -1.05426  | 0.29176  | 0.976184  |
| gene1829 | gene1829 | SACOL1870   | gi 57650036 ref NC_002951.2 :1922464-1923031 | MR150 | M36C05 | OK     | 1.25102 | 2.40669 | 0.94395   | -0.994603 | 0.31993  | 0.999883  |
| gene183  | gene183  | SACOL0189   | gi 57650036 ref NC_002951.2 :222644-223418   | MR150 | M36C05 | NOTEST | 0       | 0       | 0         | 0         | 1        | 1         |
| gene1830 | gene1830 | epiG        | gi 57650036 ref NC_002951.2 :1923504-1925650 | MR150 | M36C05 | OK     | 12.8852 | 161.648 | 3.64907   | -2.39312  | 0.01671  | 0.231165  |
| gene1831 | gene1831 | epiE        | gi 57650036 ref NC_002951.2 :1923504-1925650 | MR150 | M36C05 | OK     | 8.7175  | 148.014 | 4.08568   | -2.58461  | 0.00975  | 0.164078  |
| gene1832 | gene1832 | epiF        | gi 57650036 ref NC_002951.2 :1923504-1925650 | MR150 | M36C05 | OK     | 15.526  | 280.457 | 4.17502   | -3.36513  | 0.00077  | 0.0282292 |
| gene1833 | gene1833 | epiP        | gi 57650036 ref NC_002951.2 :1925672-1927046 | MR150 | M36C05 | OK     | 3.65275 | 68.1696 | 4.22207   | -5.62298  | 1.88E-08 | 4.00E-06  |
| gene1834 | gene1834 | epiD        | gi 57650036 ref NC_002951.2 :1927055-1927574 | MR150 | M36C05 | OK     | 0.95922 | 2.0769  | 1.1145    | -1.05616  | 0.2909   | 0.975616  |
| gene1835 | gene1835 | epiC        | gi 57650036 ref NC_002951.2 :1927589-1931820 | MR150 | M36C05 | OK     | 0.58622 | 1.47698 | 1.33314   | -1.23359  | 0.21736  | 0.89416   |
| gene1836 | gene1836 | epiB        | gi 57650036 ref NC_002951.2 :1927589-1931820 | MR150 | M36C05 | NOTEST | 0.16448 | 0.67044 | 2.02722   | -1.7436   | 0.08123  | 1         |
| gene1837 | gene1837 | epiA        | gi 57650036 ref NC_002951.2 :1931884-1932028 | MR150 | M36C05 | OK     | 37.5783 | 74.8453 | 0.994014  | -0.703259 | 0.48189  | 0.999883  |
| gene1838 | gene1838 | SACOL1879   | gi 57650036 ref NC_002951.2 :1932919-1934239 | MR150 | M36C05 | NOTEST | 0.68372 | 0.49214 | -0.474325 | 0.506542  | 0.61248  | 1         |
| gene1839 | gene1839 | lukD        | gi 57650036 ref NC_002951.2 :1934670-1935654 | MR150 | M36C05 | OK     | 1.56255 | 3.51645 | 1.17021   | -1.52383  | 0.12755  | 0.707889  |
| gene184  | gene184  | acpD        | gi 57650036 ref NC_002951.2 :223607-224234   | MR150 | M36C05 | OK     | 56.639  | 30.2438 | -0.905155 | 1.30081   | 0.19332  | 0.855185  |
| gene1840 | gene1840 | lukE        | gi 57650036 ref NC_002951.2 :1935655-1936591 | MR150 | M36C05 | OK     | 0.62415 | 2.09779 | 1.7489    | -1.92317  | 0.05446  | 0.462964  |
| gene1841 | gene1841 | SACOL1882   | gi 57650036 ref NC_002951.2 :1937390-1937930 | MR150 | M36C05 | OK     | 2.25029 | 6.49515 | 1.52925   | -1.85908  | 0.06302  | 0.504373  |
| gene1842 | gene1842 | SACOL1883   | gi 57650036 ref NC_002951.2 :1937942-1938731 | MR150 | M36C05 | OK     | 21.8351 | 32.2145 | 0.56106   | -0.813824 | 0.41575  | 0.999883  |
| gene1843 | gene1843 | SACOL_tRNA- | gi 57650036 ref NC_002951.2 :1939973-1940062 | MR150 | M36C05 | NOTEST | 0       | 0       | 0         | 0         | 1        | 1         |
| gene1844 | gene1844 | SACOL_tRNA- | gi 57650036 ref NC_002951.2 :1940116-1940188 | MR150 | M36C05 | NOTEST | 0       | 0       | 0         | 0         | 1        | 1         |
| gene1845 | gene1845 | SACOL_tRNA- | gi 57650036 ref NC_002951.2 :1940189-1940264 | MR150 | M36C05 | NOTEST | 0       | 0       | 0         | 0         | 1        | 1         |
| gene1846 | gene1846 | SACOL_tRNA- | gi 57650036 ref NC_002951.2 :1940278-1940352 | MR150 | M36C05 | NOTEST | 0       | 0       | 0         | 0         | 1        | 1         |
| gene1847 | gene1847 | SACOL_tRNA- | gi 57650036 ref NC_002951.2 :1940367-1940443 | MR150 | M36C05 | NOTEST | 0       | 0       | 0         | 0         | 1        | 1         |
| gene1849 | gene1849 | SACOL_tRNA- | gi 57650036 ref NC_002951.2 :1940545-1940621 | MR150 | M36C05 | NOTEST | 0       | 0       | 0         | 0         | 1        | 1         |
| gene185  | gene185  | SACOL0191   | gi 57650036 ref NC_002951.2 :224442-225021   | MR150 | M36C05 | OK     | 9.2879  | 32.3339 | 1.79962   | -2.59219  | 0.00954  | 0.161634  |
| gene1850 | gene1850 | SACOL_tRNA- | gi 57650036 ref NC_002951.2 :1940642-1940716 | MR150 | M36C05 | NOTEST | 0       | 0       | 0         | 0         | 1        | 1         |
| gene1851 | gene1851 | SACOL1885   | gi 57650036 ref NC_002951.2 :1941187-1941742 | MR150 | M36C05 | OK     | 12.0702 | 14.929  | 0.306669  | -0.443345 | 0.65752  | 0.999883  |
| gene1852 | gene1852 | SACOL1886   | gi 57650036 ref NC_002951.2 :1941835-1942063 | MR150 | M36C05 | OK     | 15.218  | 21.7698 | 0.516547  | -0.598096 | 0.54978  | 0.999883  |
| gene1853 | gene1853 | hemG        | gi 57650036 ref NC_002951.2 :1942064-1943465 | MR150 | M36C05 | OK     | 27.4176 | 22.0284 | -0.315735 | 0.437684  | 0.66162  | 0.999883  |
| gene1854 | gene1854 | hemH        | gi 57650036 ref NC_002951.2 :1943488-1944412 | MR150 | M36C05 | OK     | 32.1476 | 26.2005 | -0.295115 | 0.421514  | 0.67338  | 0.999883  |
| gene1855 | gene1855 | hemE        | gi 57650036 ref NC_002951.2 :1944469-1945607 | MR150 | M36C05 | OK     | 20.4667 | 21.9747 | 0.102561  | -0.148061 | 0.88229  | 0.999883  |

|          |          |             |                                              |       |        |        |         |         |            |           |          |           |
|----------|----------|-------------|----------------------------------------------|-------|--------|--------|---------|---------|------------|-----------|----------|-----------|
| gene1856 | gene1856 | SACOL1890   | gi 57650036 ref NC_002951.2 :1944469-1945607 | MR150 | M36C05 | NOTEST | 0       | 0       | 0          | 0         | 1        | 1         |
| gene1857 | gene1857 | SACOL1891   | gi 57650036 ref NC_002951.2 :1945769-1946273 | MR150 | M36C05 | OK     | 72.4607 | 161.637 | 1.15749    | -1.58219  | 0.11361  | 0.667905  |
| gene1858 | gene1858 | SACOL1892   | gi 57650036 ref NC_002951.2 :1946396-1948353 | MR150 | M36C05 | OK     | 59.8233 | 60.6146 | 0.0189595  | -0.017455 | 0.98607  | 0.999883  |
| gene1859 | gene1859 | SACOL1893   | gi 57650036 ref NC_002951.2 :1946396-1948353 | MR150 | M36C05 | OK     | 77.822  | 84.8381 | 0.124534   | -0.096796 | 0.92289  | 0.999883  |
| gene186  | gene186  | SACOL0192   | gi 57650036 ref NC_002951.2 :225403-226501   | MR150 | M36C05 | OK     | 0.5116  | 2.57848 | 2.33342    | -2.61874  | 0.00883  | 0.154274  |
| gene1860 | gene1860 | SACOL1894   | gi 57650036 ref NC_002951.2 :1948486-1948909 | MR150 | M36C05 | OK     | 96.448  | 72.1283 | -0.419187  | 0.602924  | 0.54656  | 0.999883  |
| gene1861 | gene1861 | SACOL1895   | gi 57650036 ref NC_002951.2 :1949050-1949416 | MR150 | M36C05 | OK     | 150.792 | 668.651 | 2.14869    | -2.76939  | 0.00562  | 0.116126  |
| gene1862 | gene1862 | SACOL1896   | gi 57650036 ref NC_002951.2 :1950148-1950706 | MR150 | M36C05 | OK     | 6.41207 | 5.24297 | -0.290404  | 0.388927  | 0.69733  | 0.999883  |
| gene1863 | gene1863 | SACOL1897   | gi 57650036 ref NC_002951.2 :1950910-1951873 | MR150 | M36C05 | OK     | 48.9689 | 50.8759 | 0.0551156  | -0.074423 | 0.94067  | 0.999883  |
| gene1864 | gene1864 | cbf1        | gi 57650036 ref NC_002951.2 :1951993-1957054 | MR150 | M36C05 | OK     | 133.108 | 81.1515 | -0.713911  | 0.338513  | 0.73498  | 0.999883  |
| gene1865 | gene1865 | SACOL1899   | gi 57650036 ref NC_002951.2 :1951993-1957054 | MR150 | M36C05 | OK     | 88.7084 | 76.8147 | -0.207689  | 0.169279  | 0.86558  | 0.999883  |
| gene1866 | gene1866 | SACOL1900   | gi 57650036 ref NC_002951.2 :1951993-1957054 | MR150 | M36C05 | OK     | 76.189  | 73.8687 | -0.0446202 | 0.020883  | 0.98334  | 0.999883  |
| gene1867 | gene1867 | SACOL1902   | gi 57650036 ref NC_002951.2 :1957825-1958170 | MR150 | M36C05 | OK     | 786.146 | 242.339 | -1.69777   | 2.14971   | 0.03158  | 0.341092  |
| gene1868 | gene1868 | SACOL1903   | gi 57650036 ref NC_002951.2 :1958238-1959363 | MR150 | M36C05 | OK     | 24.8338 | 19.0716 | -0.380879  | 0.545332  | 0.58553  | 0.999883  |
| gene1869 | gene1869 | SACOL1904   | gi 57650036 ref NC_002951.2 :1959541-1960006 | MR150 | M36C05 | OK     | 111.907 | 10.413  | -3.42584   | 4.74742   | 2.06E-06 | 0.0002071 |
| gene187  | gene187  | SACOL0193   | gi 57650036 ref NC_002951.2 :226513-227785   | MR150 | M36C05 | OK     | 0.71432 | 2.15962 | 1.59614    | -1.94513  | 0.05176  | 0.447556  |
| gene1870 | gene1870 | SACOL1905   | gi 57650036 ref NC_002951.2 :1960361-1960985 | MR150 | M36C05 | OK     | 19.4945 | 8.85111 | -1.13913   | 1.64806   | 0.09934  | 0.636777  |
| gene1871 | gene1871 | SACOL1906   | gi 57650036 ref NC_002951.2 :1961006-1962119 | MR150 | M36C05 | OK     | 14.4251 | 9.54047 | -0.596447  | 0.874353  | 0.38193  | 0.999883  |
| gene1872 | gene1872 | SACOL1907   | gi 57650036 ref NC_002951.2 :1962281-1963103 | MR150 | M36C05 | OK     | 73.3555 | 32.6311 | -1.16865   | 1.608     | 0.10783  | 0.653986  |
| gene1873 | gene1873 | fumC        | gi 57650036 ref NC_002951.2 :1963565-1964951 | MR150 | M36C05 | OK     | 198.224 | 104.1   | -0.929154  | 1.06078   | 0.28879  | 0.975616  |
| gene1874 | gene1874 | SACOL1909   | gi 57650036 ref NC_002951.2 :1965146-1965542 | MR150 | M36C05 | OK     | 41.107  | 8.40315 | -2.29038   | 3.15043   | 0.00163  | 0.0497828 |
| gene1875 | gene1875 | SACOL1910   | gi 57650036 ref NC_002951.2 :1965660-1966023 | MR150 | M36C05 | OK     | 1.84801 | 2.66989 | 0.530813   | -0.481186 | 0.63038  | 0.999883  |
| gene1876 | gene1876 | SACOL1911   | gi 57650036 ref NC_002951.2 :1966318-1966471 | MR150 | M36C05 | OK     | 569.717 | 2787.74 | 2.29078    | -3.27937  | 0.00104  | 0.035515  |
| gene1877 | gene1877 | SACOL1912   | gi 57650036 ref NC_002951.2 :1966495-1967095 | MR150 | M36C05 | OK     | 114.029 | 692.978 | 2.60341    | -3.09447  | 0.00197  | 0.057304  |
| gene1878 | gene1878 | SACOL1913   | gi 57650036 ref NC_002951.2 :1967253-1967724 | MR150 | M36C05 | OK     | 20.8739 | 15.8864 | -0.393902  | 0.570295  | 0.56848  | 0.999883  |
| gene1879 | gene1879 | SACOL1914   | gi 57650036 ref NC_002951.2 :1967728-1968856 | MR150 | M36C05 | OK     | 35.9751 | 23.4059 | -0.620127  | 0.866097  | 0.38644  | 0.999883  |
| gene188  | gene188  | SACOL0194   | gi 57650036 ref NC_002951.2 :227787-229056   | MR150 | M36C05 | OK     | 1.28938 | 3.50635 | 1.44329    | -1.92515  | 0.05421  | 0.462646  |
| gene1880 | gene1880 | SACOL1915   | gi 57650036 ref NC_002951.2 :1969006-1971179 | MR150 | M36C05 | OK     | 27.204  | 14.1829 | -0.939669  | 0.820559  | 0.4119   | 0.999883  |
| gene1881 | gene1881 | SACOL1916   | gi 57650036 ref NC_002951.2 :1969006-1971179 | MR150 | M36C05 | OK     | 18.5056 | 8.76235 | -1.07857   | 1.1716    | 0.24136  | 0.912589  |
| gene1882 | gene1882 | SACOL1917   | gi 57650036 ref NC_002951.2 :1971436-1972498 | MR150 | M36C05 | OK     | 47.7887 | 29.0373 | -0.718761  | 0.986715  | 0.32378  | 0.999883  |
| gene1883 | gene1883 | SACOL1918   | gi 57650036 ref NC_002951.2 :1972990-1974310 | MR150 | M36C05 | NOTEST | 0.13674 | 0.49214 | 1.8476     | -1.36323  | 0.17281  | 1         |
| gene1884 | gene1884 | SACOL_tRNA- | gi 57650036 ref NC_002951.2 :1974496-1974580 | MR150 | M36C05 | NOTEST | 0       | 0       | 0          | 0         | 1        | 1         |
| gene1885 | gene1885 | SACOL_tRNA- | gi 57650036 ref NC_002951.2 :1974796-1974871 | MR150 | M36C05 | NOTEST | 0       | 0       | 0          | 0         | 1        | 1         |

|          |          |                                                         |       |        |        |         |         |             |             |         |          |
|----------|----------|---------------------------------------------------------|-------|--------|--------|---------|---------|-------------|-------------|---------|----------|
| gene1886 | gene1886 | SACOL_tRNA-gi 57650036 ref NC_002951.2 :1974878-1974952 | MR150 | M36C05 | NOTEST | 0       | 0       | 0           | 0           | 1       | 1        |
| gene1887 | gene1887 | SACOL_tRNA-gi 57650036 ref NC_002951.2 :1974957-1975029 | MR150 | M36C05 | NOTEST | 0       | 0       | 0           | 0           | 1       | 1        |
| gene1888 | gene1888 | SACOL_tRNA-gi 57650036 ref NC_002951.2 :1975040-1975113 | MR150 | M36C05 | NOTEST | 0       | 0       | 0           | 0           | 1       | 1        |
| gene1889 | gene1889 | SACOL_tRNA-gi 57650036 ref NC_002951.2 :1975115-1975189 | MR150 | M36C05 | NOTEST | 0       | 0       | 0           | 0           | 1       | 1        |
| gene189  | gene189  | SACOL0195 gi 57650036 ref NC_002951.2 :229057-229897    | MR150 | M36C05 | OK     | 1.43544 | 3.27463 | 1.18984     | -1.47771    | 0.13949 | 0.736061 |
| gene1890 | gene1890 | SACOL_tRNA-gi 57650036 ref NC_002951.2 :1975204-1975285 | MR150 | M36C05 | NOTEST | 0       | 0       | 0           | 0           | 1       | 1        |
| gene1891 | gene1891 | SACOL_tRNA-gi 57650036 ref NC_002951.2 :1975290-1975366 | MR150 | M36C05 | NOTEST | 0       | 0       | 0           | 0           | 1       | 1        |
| gene1892 | gene1892 | SACOL_tRNA-gi 57650036 ref NC_002951.2 :1975373-1975446 | MR150 | M36C05 | NOTEST | 0       | 0       | 0           | 0           | 1       | 1        |
| gene1893 | gene1893 | SACOL_tRNA-gi 57650036 ref NC_002951.2 :1975464-1975540 | MR150 | M36C05 | NOTEST | 0       | 0       | 0           | 0           | 1       | 1        |
| gene1894 | gene1894 | SACOL_tRNA-gi 57650036 ref NC_002951.2 :1975549-1975623 | MR150 | M36C05 | NOTEST | 0       | 0       | 0           | 0           | 1       | 1        |
| gene1896 | gene1896 | SACOL_tRNA-gi 57650036 ref NC_002951.2 :1975768-1975844 | MR150 | M36C05 | OK     | 0       | 293622  | 1.79769e+30 | 1.79769e+30 | 0.14732 | 0.743774 |
| gene1898 | gene1898 | SACOL_tRNA-gi 57650036 ref NC_002951.2 :1975953-1976027 | MR150 | M36C05 | NOTEST | 0       | 0       | 0           | 0           | 1       | 1        |
| gene19   | gene19   | SACOL_tRNA-gi 57650036 ref NC_002951.2 :24259-24332     | MR150 | M36C05 | NOTEST | 0       | 0       | 0           | 0           | 1       | 1        |
| gene190  | gene190  | SACOL0196 gi 57650036 ref NC_002951.2 :229970-231047    | MR150 | M36C05 | OK     | 1.74616 | 2.2631  | 0.374114    | -0.48862    | 0.62511 | 0.999883 |
| gene1905 | gene1905 | SACOL_tRNA-gi 57650036 ref NC_002951.2 :1976595-1976677 | MR150 | M36C05 | NOTEST | 0       | 0       | 0           | 0           | 1       | 1        |
| gene1906 | gene1906 | SACOL_tRNA-gi 57650036 ref NC_002951.2 :1976680-1976756 | MR150 | M36C05 | NOTEST | 0       | 0       | 0           | 0           | 1       | 1        |
| gene1907 | gene1907 | SACOL_tRNA-gi 57650036 ref NC_002951.2 :1976761-1976837 | MR150 | M36C05 | NOTEST | 0       | 0       | 0           | 0           | 1       | 1        |
| gene1908 | gene1908 | SACOL_tRNA-gi 57650036 ref NC_002951.2 :1976853-1976929 | MR150 | M36C05 | NOTEST | 0       | 0       | 0           | 0           | 1       | 1        |
| gene1909 | gene1909 | rrfD gi 57650036 ref NC_002951.2 :1976940-1977055       | MR150 | M36C05 | OK     | 277239  | 214973  | -0.366974   | 0.450087    | 0.65265 | 0.999883 |
| gene191  | gene191  | SACOL0197 gi 57650036 ref NC_002951.2 :231071-232112    | MR150 | M36C05 | OK     | 1.63878 | 2.75342 | 0.748597    | -0.977601   | 0.32827 | 0.999883 |
| gene1910 | gene1910 | rrlD gi 57650036 ref NC_002951.2 :1977127-1980050       | MR150 | M36C05 | OK     | 36607.2 | 38501   | 0.0727668   | -0.17854    | 0.8583  | 0.999883 |
| gene1913 | gene1913 | rrsD gi 57650036 ref NC_002951.2 :1980523-1982078       | MR150 | M36C05 | OK     | 14328.8 | 12425.8 | -0.205576   | 0.298106    | 0.76562 | 0.999883 |
| gene1914 | gene1914 | SACOL1919 gi 57650036 ref NC_002951.2 :1982817-1983264  | MR150 | M36C05 | OK     | 877.637 | 1002.26 | 0.191566    | -0.211866   | 0.83221 | 0.999883 |
| gene1915 | gene1915 | SACOL1920 gi 57650036 ref NC_002951.2 :1983360-1984311  | MR150 | M36C05 | OK     | 38.9444 | 87.0796 | 1.16092     | -1.54249    | 0.12296 | 0.6962   |
| gene1916 | gene1916 | bcp gi 57650036 ref NC_002951.2 :1984316-1984772        | MR150 | M36C05 | OK     | 60.2925 | 178.031 | 1.56208     | -2.16342    | 0.03051 | 0.333021 |
| gene1917 | gene1917 | hemL2 gi 57650036 ref NC_002951.2 :1984852-1986142      | MR150 | M36C05 | OK     | 100.602 | 65.8418 | -0.611583   | 0.752172    | 0.45195 | 0.999883 |
| gene1918 | gene1918 | SACOL1923 gi 57650036 ref NC_002951.2 :1986434-1987529  | MR150 | M36C05 | OK     | 40.8942 | 31.4151 | -0.380437   | 0.522869    | 0.60107 | 0.999883 |
| gene1919 | gene1919 | SACOL1924 gi 57650036 ref NC_002951.2 :1987719-1989456  | MR150 | M36C05 | OK     | 15.4462 | 11.1149 | -0.474758   | 0.679296    | 0.49695 | 0.999883 |
| gene192  | gene192  | SACOL0198 gi 57650036 ref NC_002951.2 :232166-233135    | MR150 | M36C05 | OK     | 1.99127 | 3.29831 | 0.728037    | -0.964673   | 0.33471 | 0.999883 |
| gene1920 | gene1920 | SACOL1925 gi 57650036 ref NC_002951.2 :1989746-1990289  | MR150 | M36C05 | OK     | 64.2426 | 24.1436 | -1.41189    | 2.04252     | 0.0411  | 0.395011 |
| gene1921 | gene1921 | mutY gi 57650036 ref NC_002951.2 :1990590-1991628       | MR150 | M36C05 | OK     | 10.4161 | 9.07936 | -0.198154   | 0.291264    | 0.77085 | 0.999883 |
| gene1922 | gene1922 | SACOL1927 gi 57650036 ref NC_002951.2 :1991779-1992757  | MR150 | M36C05 | OK     | 165.726 | 171.51  | 0.0494911   | -0.058136   | 0.95364 | 0.999883 |
| gene1923 | gene1923 | SACOL1928 gi 57650036 ref NC_002951.2 :1993017-1993854  | MR150 | M36C05 | OK     | 27.8825 | 20.4331 | -0.448453   | 0.651512    | 0.51472 | 0.999883 |

|          |          |           |                                              |       |        |        |         |         |            |           |          |           |
|----------|----------|-----------|----------------------------------------------|-------|--------|--------|---------|---------|------------|-----------|----------|-----------|
| gene1924 | gene1924 | SACOL1929 | gi 57650036 ref NC_002951.2 :1993862-1995380 | MR150 | M36C05 | OK     | 24.752  | 21.0753 | -0.231994  | 0.32102   | 0.7482   | 0.999883  |
| gene1925 | gene1925 | SACOL1930 | gi 57650036 ref NC_002951.2 :1995394-1996505 | MR150 | M36C05 | OK     | 34.0239 | 39.1189 | 0.201317   | -0.156464 | 0.87567  | 0.999883  |
| gene1926 | gene1926 | recX      | gi 57650036 ref NC_002951.2 :1995394-1996505 | MR150 | M36C05 | OK     | 12.3676 | 23.7011 | 0.938392   | -1.13877  | 0.2548   | 0.932724  |
| gene1927 | gene1927 | SACOL1932 | gi 57650036 ref NC_002951.2 :1996765-1997575 | MR150 | M36C05 | OK     | 63.5027 | 51.1768 | -0.311327  | 0.424378  | 0.67129  | 0.999883  |
| gene1928 | gene1928 | SACOL1933 | gi 57650036 ref NC_002951.2 :1997915-1998431 | MR150 | M36C05 | OK     | 66.8126 | 524.156 | 2.9718     | -3.75512  | 0.00017  | 0.0090861 |
| gene1929 | gene1929 | SACOL1934 | gi 57650036 ref NC_002951.2 :1998561-1998723 | MR150 | M36C05 | OK     | 30.2084 | 21.1514 | -0.514199  | 0.402893  | 0.68703  | 0.999883  |
| gene193  | gene193  | SACOL0199 | gi 57650036 ref NC_002951.2 :233495-234068   | MR150 | M36C05 | OK     | 4.51339 | 1.77594 | -1.34563   | 1.57752   | 0.11468  | 0.670749  |
| gene1930 | gene1930 | SACOL1935 | gi 57650036 ref NC_002951.2 :1998946-2000098 | MR150 | M36C05 | OK     | 12.7083 | 9.95997 | -0.351559  | 0.515921  | 0.60591  | 0.999883  |
| gene1931 | gene1931 | SACOL1936 | gi 57650036 ref NC_002951.2 :2000357-2000888 | MR150 | M36C05 | OK     | 78.123  | 110.086 | 0.494817   | -0.682926 | 0.49465  | 0.999883  |
| gene1932 | gene1932 | pepS      | gi 57650036 ref NC_002951.2 :2000977-2002234 | MR150 | M36C05 | OK     | 34.7737 | 51.4197 | 0.564323   | -0.749495 | 0.45356  | 0.999883  |
| gene1933 | gene1933 | SACOL1938 | gi 57650036 ref NC_002951.2 :2002236-2002443 | MR150 | M36C05 | OK     | 25.9997 | 21.6624 | -0.263298  | 0.299681  | 0.76442  | 0.999883  |
| gene1934 | gene1934 | SACOL1939 | gi 57650036 ref NC_002951.2 :2002583-2003048 | MR150 | M36C05 | OK     | 27.6884 | 812.631 | 4.87525    | -6.12035  | 9.34E-10 | 3.48E-07  |
| gene1935 | gene1935 | SACOL1940 | gi 57650036 ref NC_002951.2 :2003054-2003330 | MR150 | M36C05 | OK     | 187.863 | 1030.1  | 2.45503    | -3.2514   | 0.00115  | 0.0379491 |
| gene1936 | gene1936 | SACOL1941 | gi 57650036 ref NC_002951.2 :2003607-2004825 | MR150 | M36C05 | OK     | 10.5308 | 90.7543 | 3.10736    | -4.13335  | 3.58E-05 | 0.002331  |
| gene1937 | gene1937 | vraR      | gi 57650036 ref NC_002951.2 :2004940-2007301 | MR150 | M36C05 | OK     | 25.6302 | 24.1286 | -0.0871033 | 0.063618  | 0.94927  | 0.999883  |
| gene1938 | gene1938 | vraS      | gi 57650036 ref NC_002951.2 :2004940-2007301 | MR150 | M36C05 | OK     | 18.6883 | 20.1199 | 0.106483   | -0.096333 | 0.92326  | 0.999883  |
| gene1939 | gene1939 | SACOL1944 | gi 57650036 ref NC_002951.2 :2004940-2007301 | MR150 | M36C05 | OK     | 17.6876 | 20.8818 | 0.239513   | -0.166248 | 0.86796  | 0.999883  |
| gene194  | gene194  | uhpT      | gi 57650036 ref NC_002951.2 :234222-235602   | MR150 | M36C05 | OK     | 8.04713 | 10.7433 | 0.416888   | -0.611421 | 0.54092  | 0.999883  |
| gene1940 | gene1940 | SACOL1945 | gi 57650036 ref NC_002951.2 :2007315-2007702 | MR150 | M36C05 | OK     | 5.6802  | 6.44724 | 0.182739   | -0.221954 | 0.82435  | 0.999883  |
| gene1941 | gene1941 | SACOL1946 | gi 57650036 ref NC_002951.2 :2007918-2008677 | MR150 | M36C05 | OK     | 116.674 | 105.983 | -0.138655  | 0.177966  | 0.85875  | 0.999883  |
| gene1942 | gene1942 | SACOL1947 | gi 57650036 ref NC_002951.2 :2009204-2010191 | MR150 | M36C05 | OK     | 12.6474 | 7.00607 | -0.852162  | 1.24671   | 0.2125   | 0.892138  |
| gene1943 | gene1943 | SACOL1948 | gi 57650036 ref NC_002951.2 :2010621-2011035 | MR150 | M36C05 | OK     | 0.71217 | 5.14369 | 2.85252    | -2.18398  | 0.02896  | 0.323976  |
| gene1944 | gene1944 | SACOL1949 | gi 57650036 ref NC_002951.2 :2011063-2011174 | MR150 | M36C05 | NOTEST | 0       | 0       | 0          | 0         | 1        | 1         |
| gene1945 | gene1945 | SACOL1950 | gi 57650036 ref NC_002951.2 :2011259-2011991 | MR150 | M36C05 | OK     | 61.2957 | 17.0063 | -1.84972   | 2.62473   | 0.00867  | 0.152769  |
| gene1946 | gene1946 | SACOL1951 | gi 57650036 ref NC_002951.2 :2011992-2013306 | MR150 | M36C05 | OK     | 48.2553 | 21.9689 | -1.13523   | 1.53786   | 0.12408  | 0.698274  |
| gene1947 | gene1947 | SACOL1952 | gi 57650036 ref NC_002951.2 :2013597-2014098 | MR150 | M36C05 | OK     | 203.279 | 488.641 | 1.26531    | -1.54106  | 0.1233   | 0.696596  |
| gene1948 | gene1948 | SACOL1953 | gi 57650036 ref NC_002951.2 :2014179-2014272 | MR150 | M36C05 | NOTEST | 0       | 0       | 0          | 0         | 1        | 1         |
| gene1949 | gene1949 | SACOL1954 | gi 57650036 ref NC_002951.2 :2014486-2015041 | MR150 | M36C05 | OK     | 63.7994 | 45.7199 | -0.48072   | 0.689996  | 0.4902   | 0.999883  |
| gene195  | gene195  | SACOL0201 | gi 57650036 ref NC_002951.2 :235960-239233   | MR150 | M36C05 | OK     | 6.84707 | 3.94722 | -0.794652  | 0.558744  | 0.57634  | 0.999883  |
| gene1950 | gene1950 | dinP      | gi 57650036 ref NC_002951.2 :2015108-2016179 | MR150 | M36C05 | OK     | 22.8564 | 33.6741 | 0.559046   | -0.788588 | 0.43035  | 0.999883  |
| gene1951 | gene1951 | SACOL1956 | gi 57650036 ref NC_002951.2 :2016425-2016956 | MR150 | M36C05 | OK     | 52.2361 | 179.808 | 1.78334    | -2.42761  | 0.0152   | 0.215671  |
| gene1952 | gene1952 | SACOL1957 | gi 57650036 ref NC_002951.2 :2017125-2018487 | MR150 | M36C05 | OK     | 10.9396 | 9.86627 | -0.148982  | 0.218217  | 0.82726  | 0.999883  |
| gene1953 | gene1953 | SACOL1958 | gi 57650036 ref NC_002951.2 :2018567-2019515 | MR150 | M36C05 | OK     | 35.8251 | 40.6922 | 0.183782   | -0.255679 | 0.7982   | 0.999883  |

|          |          |           |                                              |       |        |        |         |         |            |           |         |           |
|----------|----------|-----------|----------------------------------------------|-------|--------|--------|---------|---------|------------|-----------|---------|-----------|
| gene1954 | gene1954 | gatB      | gi 57650036 ref NC_002951.2 :2020283-2021711 | MR150 | M36C05 | OK     | 134.075 | 36.9834 | -1.85809   | 2.27781   | 0.02274 | 0.287183  |
| gene1955 | gene1955 | gatA      | gi 57650036 ref NC_002951.2 :2021723-2023181 | MR150 | M36C05 | OK     | 79.6227 | 20.8544 | -1.93283   | 2.50787   | 0.01215 | 0.188226  |
| gene1956 | gene1956 | gatC      | gi 57650036 ref NC_002951.2 :2023182-2023485 | MR150 | M36C05 | OK     | 121.481 | 34.8385 | -1.80198   | 2.60123   | 0.00929 | 0.161212  |
| gene1957 | gene1957 | SACOL1963 | gi 57650036 ref NC_002951.2 :2023852-2025391 | MR150 | M36C05 | OK     | 123.764 | 116.482 | -0.0874842 | 0.10047   | 0.91997 | 0.999883  |
| gene1958 | gene1958 | camS      | gi 57650036 ref NC_002951.2 :2025479-2026679 | MR150 | M36C05 | OK     | 89.5905 | 61.4091 | -0.544893  | 0.684615  | 0.49359 | 0.999883  |
| gene1959 | gene1959 | ligA      | gi 57650036 ref NC_002951.2 :2026691-2028695 | MR150 | M36C05 | OK     | 45.1705 | 24.253  | -0.897217  | 1.15295   | 0.24893 | 0.922459  |
| gene196  | gene196  | SACOL0202 | gi 57650036 ref NC_002951.2 :235960-239233   | MR150 | M36C05 | OK     | 4.06324 | 3.89889 | -0.0595659 | 0.057463  | 0.95418 | 0.999883  |
| gene1960 | gene1960 | pcrA      | gi 57650036 ref NC_002951.2 :2028698-2031580 | MR150 | M36C05 | OK     | 30.8195 | 11.2801 | -1.45006   | 1.72423   | 0.08467 | 0.579146  |
| gene1961 | gene1961 | SACOL1967 | gi 57650036 ref NC_002951.2 :2028698-2031580 | MR150 | M36C05 | OK     | 22.047  | 12.982  | -0.764062  | 0.423261  | 0.67211 | 0.999883  |
| gene1962 | gene1962 | SACOL1968 | gi 57650036 ref NC_002951.2 :2031751-2032054 | MR150 | M36C05 | OK     | 162.895 | 100.534 | -0.696264  | 1.01296   | 0.31108 | 0.993813  |
| gene1963 | gene1963 | purB      | gi 57650036 ref NC_002951.2 :2032162-2033458 | MR150 | M36C05 | OK     | 61.7636 | 37.6189 | -0.715298  | 0.932616  | 0.35102 | 0.999883  |
| gene1964 | gene1964 | sspB2     | gi 57650036 ref NC_002951.2 :2034318-2035485 | MR150 | M36C05 | OK     | 0.79185 | 1.59622 | 1.01135    | -1.20333  | 0.22885 | 0.898537  |
| gene1965 | gene1965 | SACOL1971 | gi 57650036 ref NC_002951.2 :2035515-2035842 | MR150 | M36C05 | OK     | 2.31506 | 2.50842 | 0.115727   | -0.100861 | 0.91966 | 0.999883  |
| gene1966 | gene1966 | SACOL1972 | gi 57650036 ref NC_002951.2 :2036133-2036890 | MR150 | M36C05 | OK     | 78.5602 | 41.6288 | -0.916215  | 0.289932  | 0.77187 | 0.999883  |
| gene1967 | gene1967 | SACOL1973 | gi 57650036 ref NC_002951.2 :2036133-2036890 | MR150 | M36C05 | OK     | 52.0328 | 36.4312 | -0.514246  | 0.721049  | 0.47088 | 0.999883  |
| gene1968 | gene1968 | nadE      | gi 57650036 ref NC_002951.2 :2037160-2039444 | MR150 | M36C05 | OK     | 60.309  | 48.7694 | -0.306398  | 0.221756  | 0.8245  | 0.999883  |
| gene1969 | gene1969 | SACOL1975 | gi 57650036 ref NC_002951.2 :2037160-2039444 | MR150 | M36C05 | OK     | 48.2389 | 48.9524 | 0.0211819  | -0.020748 | 0.98345 | 0.999883  |
| gene197  | gene197  | SACOL0203 | gi 57650036 ref NC_002951.2 :235960-239233   | MR150 | M36C05 | OK     | 5.57556 | 4.87576 | -0.193489  | 0.161046  | 0.87206 | 0.999883  |
| gene1970 | gene1970 | SACOL1976 | gi 57650036 ref NC_002951.2 :2039627-2040704 | MR150 | M36C05 | OK     | 26.5416 | 18.7334 | -0.502642  | 0.72044   | 0.47125 | 0.999883  |
| gene1971 | gene1971 | pheA      | gi 57650036 ref NC_002951.2 :2040723-2041518 | MR150 | M36C05 | OK     | 35.5105 | 25.4001 | -0.48341   | 0.696765  | 0.48595 | 0.999883  |
| gene1972 | gene1972 | SACOL1978 | gi 57650036 ref NC_002951.2 :2041542-2041665 | MR150 | M36C05 | NOTEST | 0       | 0       | 0          | 0         | 1       | 1         |
| gene1973 | gene1973 | SACOL1979 | gi 57650036 ref NC_002951.2 :2041707-2043270 | MR150 | M36C05 | OK     | 94.2792 | 69.6283 | -0.437267  | 0.524072  | 0.60023 | 0.999883  |
| gene1974 | gene1974 | SACOL1980 | gi 57650036 ref NC_002951.2 :2043474-2044572 | MR150 | M36C05 | OK     | 7.16243 | 17.3126 | 1.2733     | -1.85697  | 0.06332 | 0.504373  |
| gene1975 | gene1975 | SACOL1981 | gi 57650036 ref NC_002951.2 :2044943-2045504 | MR150 | M36C05 | OK     | 55.1102 | 72.1791 | 0.389261   | -0.552391 | 0.58068 | 0.999883  |
| gene1976 | gene1976 | ppaC      | gi 57650036 ref NC_002951.2 :2045556-2046486 | MR150 | M36C05 | OK     | 224.443 | 208.635 | -0.10537   | 0.121243  | 0.9035  | 0.999883  |
| gene1977 | gene1977 | SACOL1983 | gi 57650036 ref NC_002951.2 :2046680-2046854 | MR150 | M36C05 | NOTEST | 0       | 0       | 0          | 0         | 1       | 1         |
| gene1978 | gene1978 | aldA2     | gi 57650036 ref NC_002951.2 :2046905-2048285 | MR150 | M36C05 | OK     | 121.745 | 354.528 | 1.54203    | -1.69721  | 0.08966 | 0.601607  |
| gene1979 | gene1979 | SACOL1985 | gi 57650036 ref NC_002951.2 :2048404-2049433 | MR150 | M36C05 | OK     | 19.0263 | 45.8901 | 1.27019    | -1.77625  | 0.07569 | 0.54506   |
| gene198  | gene198  | pflB      | gi 57650036 ref NC_002951.2 :239820-242070   | MR150 | M36C05 | OK     | 9.41471 | 77.7859 | 3.04652    | -3.86775  | 0.00011 | 0.0061623 |
| gene1980 | gene1980 | SACOL1986 | gi 57650036 ref NC_002951.2 :2049702-2050104 | MR150 | M36C05 | OK     | 24.1057 | 42.9841 | 0.834431   | -1.21783  | 0.22329 | 0.89446   |
| gene1981 | gene1981 | SACOL1987 | gi 57650036 ref NC_002951.2 :2050676-2050850 | MR150 | M36C05 | OK     | 1001.64 | 1463.95 | 0.547497   | -0.78561  | 0.4321  | 0.999883  |
| gene1982 | gene1982 | SACOL1988 | gi 57650036 ref NC_002951.2 :2051300-2052341 | MR150 | M36C05 | OK     | 16.5699 | 17.5694 | 0.0844987  | -0.123126 | 0.90201 | 0.999883  |
| gene1983 | gene1983 | SACOL1989 | gi 57650036 ref NC_002951.2 :2052397-2053794 | MR150 | M36C05 | OK     | 44.7674 | 31.2209 | -0.519936  | 0.556321  | 0.57799 | 0.999883  |



|          |          |           |                                              |       |        |        |         |         |             |             |          |           |
|----------|----------|-----------|----------------------------------------------|-------|--------|--------|---------|---------|-------------|-------------|----------|-----------|
| gene1984 | gene1984 | SACOL1990 | gi 57650036 ref NC_002951.2 :2052397-2053794 | MR150 | M36C05 | OK     | 40.6098 | 38.2429 | -0.0866359  | 0.070764    | 0.94359  | 0.999883  |
| gene1985 | gene1985 | SACOL1991 | gi 57650036 ref NC_002951.2 :2053853-2054378 | MR150 | M36C05 | OK     | 42.8409 | 35.3348 | -0.2779     | 0.406457    | 0.68441  | 0.999883  |
| gene1986 | gene1986 | SACOL1992 | gi 57650036 ref NC_002951.2 :2054498-2055062 | MR150 | M36C05 | OK     | 92.0756 | 154.996 | 0.751341    | -1.00051    | 0.31707  | 0.999883  |
| gene1987 | gene1987 | SACOL1993 | gi 57650036 ref NC_002951.2 :2055127-2057417 | MR150 | M36C05 | OK     | 20.9412 | 39.36   | 0.910386    | -0.763504   | 0.44516  | 0.999883  |
| gene1988 | gene1988 | SACOL1994 | gi 57650036 ref NC_002951.2 :2055127-2057417 | MR150 | M36C05 | OK     | 20.2489 | 36.219  | 0.838904    | -0.761402   | 0.44642  | 0.999883  |
| gene1989 | gene1989 | SACOL1995 | gi 57650036 ref NC_002951.2 :2055127-2057417 | MR150 | M36C05 | OK     | 8.2748  | 19.0421 | 1.20239     | -0.629282   | 0.52916  | 0.999883  |
| gene199  | gene199  | pflA      | gi 57650036 ref NC_002951.2 :242092-242848   | MR150 | M36C05 | OK     | 11.2897 | 43.654  | 1.9511      | -2.80459    | 0.00504  | 0.10765   |
| gene1990 | gene1990 | SACOL1996 | gi 57650036 ref NC_002951.2 :2057417-2058691 | MR150 | M36C05 | OK     | 17.7946 | 31.4891 | 0.823418    | -0.904677   | 0.36564  | 0.999883  |
| gene1991 | gene1991 | SACOL1997 | gi 57650036 ref NC_002951.2 :2057417-2058691 | MR150 | M36C05 | OK     | 34.3219 | 84.6526 | 1.30243     | -1.10918    | 0.26735  | 0.950995  |
| gene1992 | gene1992 | SACOL1998 | gi 57650036 ref NC_002951.2 :2058954-2059131 | MR150 | M36C05 | OK     | 0       | 31.7031 | 1.79769e+30 | 1.79769e+30 | 0.01809  | 0.243354  |
| gene1993 | gene1993 | SACOL1999 | gi 57650036 ref NC_002951.2 :2059373-2059472 | MR150 | M36C05 | NOTEST | 0       | 0       | 0           | 0           | 1        | 1         |
| gene1994 | gene1994 | SACOL2000 | gi 57650036 ref NC_002951.2 :2059671-2060958 | MR150 | M36C05 | OK     | 138.498 | 99.1876 | -0.481633   | 0.567712    | 0.57023  | 0.999883  |
| gene1995 | gene1995 | map       | gi 57650036 ref NC_002951.2 :2061281-2063337 | MR150 | M36C05 | OK     | 5.52941 | 8.90674 | 0.687772    | -1.0034     | 0.31567  | 0.999465  |
| gene1996 | gene1996 | hIb       | gi 57650036 ref NC_002951.2 :2063725-2064718 | MR150 | M36C05 | OK     | 9.26897 | 26.5605 | 1.5188      | -2.19986    | 0.02782  | 0.315942  |
| gene1997 | gene1997 | SACOL2004 | gi 57650036 ref NC_002951.2 :2064955-2065828 | MR150 | M36C05 | OK     | 1.36509 | 2.13053 | 0.642212    | -0.777628   | 0.43679  | 0.999883  |
| gene1998 | gene1998 | SACOL2006 | gi 57650036 ref NC_002951.2 :2065993-2067049 | MR150 | M36C05 | OK     | 0.3578  | 1.28815 | 1.8481      | -1.82575    | 0.06789  | 0.522414  |
| gene1999 | gene1999 | SACOL2007 | gi 57650036 ref NC_002951.2 :2067483-2068708 | MR150 | M36C05 | OK     | 4.63178 | 163.166 | 5.13863     | -6.51905    | 7.08E-11 | 3.20E-08  |
| gene2    | gene2    | SACOL0003 | gi 57650036 ref NC_002951.2 :3696-5051       | MR150 | M36C05 | OK     | 418.84  | 421.879 | 0.0104313   | -0.004148   | 0.99669  | 0.999883  |
| gene20   | gene20   | yycF      | gi 57650036 ref NC_002951.2 :24951-25653     | MR150 | M36C05 | OK     | 97.8915 | 162.219 | 0.728686    | -0.93147    | 0.35161  | 0.999883  |
| gene200  | gene200  | SACOL0206 | gi 57650036 ref NC_002951.2 :242951-243146   | MR150 | M36C05 | NOTEST | 0       | 0       | 0           | 0           | 1        | 1         |
| gene2000 | gene2000 | SACOL2009 | gi 57650036 ref NC_002951.2 :2069079-2069925 | MR150 | M36C05 | OK     | 0       | 3.75641 | 1.79769e+30 | 1.79769e+30 | 0.00265  | 0.0711264 |
| gene2001 | gene2001 | SACOL2010 | gi 57650036 ref NC_002951.2 :2069986-2070898 | MR150 | M36C05 | NOTEST | 0.64518 | 0.4647  | -0.473411   | 0.439858    | 0.66004  | 1         |
| gene2002 | gene2002 | SACOL2011 | gi 57650036 ref NC_002951.2 :2071058-2072366 | MR150 | M36C05 | OK     | 8.56987 | 9.94951 | 0.215352    | -0.316347   | 0.75174  | 0.999883  |
| gene2003 | gene2003 | SACOL2012 | gi 57650036 ref NC_002951.2 :2073218-2073662 | MR150 | M36C05 | OK     | 11.8941 | 9.94572 | -0.258104   | 0.35612     | 0.72175  | 0.999883  |
| gene2004 | gene2004 | SACOL2013 | gi 57650036 ref NC_002951.2 :2073767-2074205 | MR150 | M36C05 | OK     | 3.84954 | 10.6569 | 1.46904     | -1.84247    | 0.06541  | 0.511729  |
| gene2005 | gene2005 | SACOL2014 | gi 57650036 ref NC_002951.2 :2074522-2075113 | MR150 | M36C05 | OK     | 2.74011 | 1.12936 | -1.27872    | 1.36105     | 0.1735   | 0.821477  |
| gene2006 | gene2006 | SACOL2015 | gi 57650036 ref NC_002951.2 :2075454-2075929 | MR150 | M36C05 | OK     | 0.556   | 1.20434 | 1.11507     | -0.788905   | 0.43017  | 0.999883  |
| gene2007 | gene2007 | groEL     | gi 57650036 ref NC_002951.2 :2076023-2077640 | MR150 | M36C05 | OK     | 121.925 | 127.257 | 0.0617465   | -0.070212   | 0.94403  | 0.999883  |
| gene2008 | gene2008 | groES     | gi 57650036 ref NC_002951.2 :2077715-2078000 | MR150 | M36C05 | OK     | 36.8713 | 25.3711 | -0.539315   | 0.750327    | 0.45306  | 0.999883  |
| gene2009 | gene2009 | SACOL2018 | gi 57650036 ref NC_002951.2 :2078174-2078918 | MR150 | M36C05 | OK     | 33.4901 | 23.5261 | -0.509473   | 0.739859    | 0.45939  | 0.999883  |
| gene201  | gene201  | SACOL0207 | gi 57650036 ref NC_002951.2 :243183-244947   | MR150 | M36C05 | OK     | 4.79871 | 2.95975 | -0.69717    | 1.01534     | 0.30994  | 0.993387  |
| gene2010 | gene2010 | SACOL2019 | gi 57650036 ref NC_002951.2 :2078942-2080202 | MR150 | M36C05 | OK     | 79.0309 | 230.265 | 1.54281     | -1.7954     | 0.07259  | 0.528391  |
| gene2011 | gene2011 | SACOL2020 | gi 57650036 ref NC_002951.2 :2080398-2081025 | MR150 | M36C05 | OK     | 112.202 | 93.8334 | -0.257932   | 0.343303    | 0.73137  | 0.999883  |

|          |          |           |                                              |       |        |        |         |         |              |              |         |           |
|----------|----------|-----------|----------------------------------------------|-------|--------|--------|---------|---------|--------------|--------------|---------|-----------|
| gene2012 | gene2012 | SACOL2021 | gi 57650036 ref NC_002951.2 :2081385-2082171 | MR150 | M36C05 | OK     | 64.7954 | 58.7352 | -0.141665    | 0.192346     | 0.84747 | 0.999883  |
| gene2013 | gene2013 | hld       | gi 57650036 ref NC_002951.2 :2082767-2082902 | MR150 | M36C05 | OK     | 335.279 | 1288.34 | 1.94208      | -2.40136     | 0.01633 | 0.229092  |
| gene2014 | gene2014 | agrB      | gi 57650036 ref NC_002951.2 :2083137-2083844 | MR150 | M36C05 | OK     | 111.68  | 827.743 | 2.88981      | -3.37134     | 0.00075 | 0.0279049 |
| gene2015 | gene2015 | agrD      | gi 57650036 ref NC_002951.2 :2083137-2083844 | MR150 | M36C05 | OK     | 44.9172 | 236.044 | 2.39372      | -0.159257    | 0.87347 | 0.999883  |
| gene2016 | gene2016 | argC2     | gi 57650036 ref NC_002951.2 :2083868-2085161 | MR150 | M36C05 | OK     | 49.3222 | 292.196 | 2.56663      | -3.00567     | 0.00265 | 0.0711263 |
| gene2017 | gene2017 | agrA      | gi 57650036 ref NC_002951.2 :2085179-2085896 | MR150 | M36C05 | OK     | 105.417 | 413.396 | 1.97141      | -2.36128     | 0.01821 | 0.244437  |
| gene2018 | gene2018 | SACOL2028 | gi 57650036 ref NC_002951.2 :2086262-2088703 | MR150 | M36C05 | OK     | 39.6924 | 39.4685 | -0.0081584   | 0.006566     | 0.99476 | 0.999883  |
| gene2019 | gene2019 | cscA      | gi 57650036 ref NC_002951.2 :2086262-2088703 | MR150 | M36C05 | OK     | 30.751  | 36.8859 | 0.262436     | -0.253618    | 0.79979 | 0.999883  |
| gene202  | gene202  | SACOL0208 | gi 57650036 ref NC_002951.2 :245110-245455   | MR150 | M36C05 | OK     | 3.08696 | 2.97348 | -0.0540339   | 0.052513     | 0.95812 | 0.999883  |
| gene2020 | gene2020 | scrR      | gi 57650036 ref NC_002951.2 :2088851-2089802 | MR150 | M36C05 | OK     | 40.1678 | 48.3123 | 0.266351     | -0.364983    | 0.71512 | 0.999883  |
| gene2021 | gene2021 | SACOL2031 | gi 57650036 ref NC_002951.2 :2089984-2091235 | MR150 | M36C05 | OK     | 1.31146 | 2.3077  | 0.815286     | -1.0674      | 0.28579 | 0.973566  |
| gene2022 | gene2022 | SACOL2033 | gi 57650036 ref NC_002951.2 :2091441-2091666 | MR150 | M36C05 | OK     | 12.7327 | 0       | -1.79769e+30 | -1.79769e+30 | 0.01565 | 0.220725  |
| gene2023 | gene2023 | SACOL2034 | gi 57650036 ref NC_002951.2 :2091725-2092805 | MR150 | M36C05 | OK     | 2.78433 | 1.87948 | -0.566999    | 0.754785     | 0.45038 | 0.999883  |
| gene2024 | gene2024 | SACOL2035 | gi 57650036 ref NC_002951.2 :2093108-2093744 | MR150 | M36C05 | OK     | 91.6322 | 113.157 | 0.304402     | -0.404623    | 0.68576 | 0.999883  |
| gene2025 | gene2025 | SACOL2036 | gi 57650036 ref NC_002951.2 :2093996-2095925 | MR150 | M36C05 | OK     | 11.9595 | 10.5812 | -0.176663    | 0.253742     | 0.7997  | 0.999883  |
| gene2026 | gene2026 | SACOL2037 | gi 57650036 ref NC_002951.2 :2096286-2097897 | MR150 | M36C05 | OK     | 5.53601 | 5.46814 | -0.0177961   | 0.026152     | 0.97914 | 0.999883  |
| gene2027 | gene2027 | SACOL2038 | gi 57650036 ref NC_002951.2 :2097998-2100531 | MR150 | M36C05 | OK     | 38.9324 | 13.7503 | -1.5015      | 1.568        | 0.11688 | 0.676159  |
| gene2028 | gene2028 | SACOL2039 | gi 57650036 ref NC_002951.2 :2097998-2100531 | MR150 | M36C05 | OK     | 27.6884 | 9.16345 | -1.59532     | 0.78269      | 0.43381 | 0.999883  |
| gene2029 | gene2029 | SACOL2040 | gi 57650036 ref NC_002951.2 :2097998-2100531 | MR150 | M36C05 | OK     | 17.5231 | 10.0111 | -0.807664    | 0.470315     | 0.63813 | 0.999883  |
| gene203  | gene203  | SACOL0209 | gi 57650036 ref NC_002951.2 :245644-247555   | MR150 | M36C05 | OK     | 1.87994 | 0.77295 | -1.28223     | 1.69388      | 0.09029 | 0.602864  |
| gene2030 | gene2030 | SACOL2041 | gi 57650036 ref NC_002951.2 :2097998-2100531 | MR150 | M36C05 | OK     | 14.9423 | 11.2605 | -0.408139    | 0.164185     | 0.86959 | 0.999883  |
| gene2031 | gene2031 | ilvD      | gi 57650036 ref NC_002951.2 :2101068-2102757 | MR150 | M36C05 | OK     | 2.77734 | 4.51534 | 0.70113      | -1.0165      | 0.30939 | 0.992496  |
| gene2032 | gene2032 | ilvB      | gi 57650036 ref NC_002951.2 :2102784-2104808 | MR150 | M36C05 | OK     | 2.92676 | 7.16049 | 1.29075      | -1.86689     | 0.06192 | 0.503472  |
| gene2033 | gene2033 | SACOL2044 | gi 57650036 ref NC_002951.2 :2102784-2104808 | MR150 | M36C05 | OK     | 0       | 3.09171 | 1.79769e+30  | 1.79769e+30  | 0.34168 | 0.999883  |
| gene2034 | gene2034 | ilvC      | gi 57650036 ref NC_002951.2 :2104944-2105949 | MR150 | M36C05 | OK     | 5.13611 | 9.31497 | 0.858875     | -1.24648     | 0.21259 | 0.892138  |
| gene2035 | gene2035 | leuA      | gi 57650036 ref NC_002951.2 :2105978-2107508 | MR150 | M36C05 | OK     | 3.80022 | 8.03906 | 1.08094      | -1.57767     | 0.11464 | 0.670749  |
| gene2036 | gene2036 | leuB      | gi 57650036 ref NC_002951.2 :2107510-2108557 | MR150 | M36C05 | OK     | 4.70074 | 10.2846 | 1.12953      | -1.63805     | 0.10141 | 0.639849  |
| gene2037 | gene2037 | leuC      | gi 57650036 ref NC_002951.2 :2108570-2109941 | MR150 | M36C05 | OK     | 2.87737 | 6.02485 | 1.06617      | -1.53431     | 0.12495 | 0.700644  |
| gene2038 | gene2038 | leuD      | gi 57650036 ref NC_002951.2 :2109941-2110514 | MR150 | M36C05 | OK     | 3.69277 | 4.73583 | 0.358915     | -0.460683    | 0.64503 | 0.999883  |
| gene2039 | gene2039 | ilvA2     | gi 57650036 ref NC_002951.2 :2110528-2111797 | MR150 | M36C05 | OK     | 4.01141 | 5.5689  | 0.473284     | -0.685781    | 0.49285 | 0.999883  |
| gene204  | gene204  | SACOL0210 | gi 57650036 ref NC_002951.2 :248020-249342   | MR150 | M36C05 | NOTEST | 0       | 0       | 0            | 0            | 1       | 1         |
| gene2040 | gene2040 | rrfE      | gi 57650036 ref NC_002951.2 :2112006-2112121 | MR150 | M36C05 | OK     | 414494  | 602455  | 0.5395       | -0.60988     | 0.54194 | 0.999883  |
| gene2041 | gene2041 | rrlE      | gi 57650036 ref NC_002951.2 :2112193-2115116 | MR150 | M36C05 | OK     | 44241.6 | 39229.6 | -0.173459    | 0.611627     | 0.54079 | 0.999883  |

|          |          |             |                                              |       |        |        |         |         |                               |           |          |           |
|----------|----------|-------------|----------------------------------------------|-------|--------|--------|---------|---------|-------------------------------|-----------|----------|-----------|
| gene2042 | gene2042 | rrsE        | gi 57650036 ref NC_002951.2 :2115662-2117217 | MR150 | M36C05 | OK     | 16702.6 | 14081.6 | -0.24626                      | 0.369486  | 0.71177  | 0.999883  |
| gene2043 | gene2043 | SACOL_tRNA- | gi 57650036 ref NC_002951.2 :2117334-2117408 | MR150 | M36C05 | NOTEST | 0       | 0       | 0                             | 0         | 1        | 1         |
| gene2044 | gene2044 | SACOL_tRNA- | gi 57650036 ref NC_002951.2 :2117427-2117513 | MR150 | M36C05 | NOTEST | 0       | 0       | 0                             | 0         | 1        | 1         |
| gene2045 | gene2045 | SACOL2052   | gi 57650036 ref NC_002951.2 :2118159-2120758 | MR150 | M36C05 | OK     | 26.863  | 8.62137 | -1.63963                      | 0.6229    | 0.53335  | 0.999883  |
| gene2046 | gene2046 | SACOL2053   | gi 57650036 ref NC_002951.2 :2118159-2120758 | MR150 | M36C05 | OK     | 34.1522 | 14.2909 | -1.25688                      | 1.58382   | 0.11324  | 0.667905  |
| gene2047 | gene2047 | rpoF        | gi 57650036 ref NC_002951.2 :2121191-2122416 | MR150 | M36C05 | OK     | 111.006 | 144.905 | 0.384469                      | -0.426695 | 0.6696   | 0.999883  |
| gene2048 | gene2048 | rsbW        | gi 57650036 ref NC_002951.2 :2121191-2122416 | MR150 | M36C05 | OK     | 50.7905 | 68.6088 | 0.433835                      | -0.230099 | 0.81802  | 0.999883  |
| gene2049 | gene2049 | rsbV        | gi 57650036 ref NC_002951.2 :2122417-2122744 | MR150 | M36C05 | OK     | 69.4519 | 123.749 | 0.833328                      | -1.21664  | 0.22374  | 0.89446   |
| gene205  | gene205  | SACOL0211   | gi 57650036 ref NC_002951.2 :248020-249342   | MR150 | M36C05 | OK     | 145.216 | 68.1655 | -1.09109                      | 1.31102   | 0.18985  | 0.848649  |
| gene2050 | gene2050 | rsbU        | gi 57650036 ref NC_002951.2 :2122863-2123865 | MR150 | M36C05 | OK     | 62.6275 | 35.1994 | -0.831245                     | 1.12321   | 0.26135  | 0.942393  |
| gene2051 | gene2051 | SACOL2058   | gi 57650036 ref NC_002951.2 :2124214-2124744 | MR150 | M36C05 | OK     | 96.0963 | 59.4051 | -0.693894                     | 0.941126  | 0.34664  | 0.999883  |
| gene2052 | gene2052 | SACOL2059   | gi 57650036 ref NC_002951.2 :2124214-2124744 | MR150 | M36C05 | OK     | 216.427 | 68.6965 | -1.65557                      | 0.824322  | 0.40976  | 0.999883  |
| gene2053 | gene2053 | alr         | gi 57650036 ref NC_002951.2 :2124828-2125977 | MR150 | M36C05 | OK     | 69.7132 | 46.8206 | -0.574289                     | 0.747077  | 0.45502  | 0.999883  |
| gene2054 | gene2054 | acpS        | gi 57650036 ref NC_002951.2 :2126042-2126402 | MR150 | M36C05 | OK     | 61.1078 | 25.8068 | -1.24361                      | 1.80606   | 0.07091  | 0.522414  |
| gene2055 | gene2055 | SACOL2062   | gi 57650036 ref NC_002951.2 :2126405-2128939 | MR150 | M36C05 | OK     | 40.961  | 29.1956 | -0.488503                     | 0.214122  | 0.83045  | 0.999883  |
| gene2056 | gene2056 | SACOL2063   | gi 57650036 ref NC_002951.2 :2126405-2128939 | MR150 | M36C05 | OK     | 43.1599 | 45.2362 | 0.0677877                     | -0.073346 | 0.94153  | 0.999883  |
| gene2057 | gene2057 | SACOL2064   | gi 57650036 ref NC_002951.2 :2126405-2128939 | MR150 | M36C05 | OK     | 30.0374 | 37.0645 | 0.30328                       | -0.127985 | 0.89816  | 0.999883  |
| gene2058 | gene2058 | SACOL2065   | gi 57650036 ref NC_002951.2 :2129034-2129708 | MR150 | M36C05 | NOTEST | 0       | 0       | 0                             | 0         | 1        | 1         |
| gene2059 | gene2059 | kdpC        | gi 57650036 ref NC_002951.2 :2129034-2129708 | MR150 | M36C05 | OK     | 9.75027 | 7.95193 | -0.294136                     | 0.411901  | 0.68041  | 0.999883  |
| gene206  | gene206  | SACOL0212   | gi 57650036 ref NC_002951.2 :249371-251633   | MR150 | M36C05 | OK     | 127.548 | 54.7264 | -1.22073                      | 1.3922    | 0.16386  | 0.793541  |
| gene2060 | gene2060 | kdpB        | gi 57650036 ref NC_002951.2 :2129727-2131755 | MR150 | M36C05 | OK     | 1.84343 | 2.65268 | 0.525057                      | -0.750695 | 0.45284  | 0.999883  |
| gene2061 | gene2061 | kdpA        | gi 57650036 ref NC_002951.2 :2131773-2133450 | MR150 | M36C05 | OK     | 0.5185  | 1.11936 | 1.11025                       | -1.32723  | 0.18443  | 0.834616  |
| gene2062 | gene2062 | kdpF        | gi 57650036 ref NC_002951.2 :2133473-2133584 | MR150 | M36C05 | NOTEST | 0       | 0       | 0                             | 0         | 1        | 1         |
| gene2063 | gene2063 | kdpD        | gi 57650036 ref NC_002951.2 :2133721-2137074 | MR150 | M36C05 | OK     | 1.49566 | 2.55534 | 0.772735                      | -1.01231  | 0.31139  | 0.993813  |
| gene2064 | gene2064 | kdpE        | gi 57650036 ref NC_002951.2 :2133721-2137074 | MR150 | M36C05 | OK     | 0.92593 | 4.22697 | 2.19065                       | -1.22328  | 0.22123  | 0.89416   |
| gene2065 | gene2065 | SACOL2072   | gi 57650036 ref NC_002951.2 :2137442-2138963 | MR150 | M36C05 | OK     | 217.624 | 25.3663 | -3.10085                      | 3.72438   | 0.0002   | 0.0097724 |
| gene2066 | gene2066 | murF        | gi 57650036 ref NC_002951.2 :2139479-2140838 | MR150 | M36C05 | OK     | 76.7753 | 68.9574 | -0.154936                     | 0.191864  | 0.84785  | 0.999883  |
| gene2067 | gene2067 | ddl         | gi 57650036 ref NC_002951.2 :2140852-2141923 | MR150 | M36C05 | OK     | 83.8653 | 98.364  | 0.230056                      | -0.287066 | 0.77406  | 0.999883  |
| gene2068 | gene2068 | ftsW        | gi 57650036 ref NC_002951.2 :2142240-2143443 | MR150 | M36C05 | OK     | 67.0302 | 48.2548 | -0.474139                     | 0.613716  | 0.5394   | 0.999883  |
| gene2069 | gene2069 | SACOL2076   | gi 57650036 ref NC_002951.2 :2143706-2143844 | MR150 | M36C05 | OK     | 19238   | 37366.6 | 0.957789                      | -1.19084  | 0.23372  | 0.902568  |
| gene207  | gene207  | SACOL0213   | gi 57650036 ref NC_002951.2 :251818-253030   | MR150 | M36C05 | OK     | 143.764 | 59.8088 | -1.26528                      | 1.54279   | 0.12288  | 0.6962    |
| gene2070 | gene2070 | SACOL2077   | gi 57650036 ref NC_002951.2 :2143971-2144181 | MR150 | M36C05 | NOTEST | 0       | 0       | 0                             | 0         | 1        | 1         |
| gene2071 | gene2071 | SACOL2078   | gi 57650036 ref NC_002951.2 :2144192-2144486 | MR150 | M36C05 | OK     | 7.42357 | 0       | -1.79769e+3(-1.79769e+0.01149 |           | 0.182325 |           |

|          |          |           |                                              |       |        |        |         |         |            |           |         |           |
|----------|----------|-----------|----------------------------------------------|-------|--------|--------|---------|---------|------------|-----------|---------|-----------|
| gene2072 | gene2072 | cls2      | gi 57650036 ref NC_002951.2 :2144651-2146136 | MR150 | M36C05 | OK     | 21.335  | 31.3101 | 0.553407   | -0.757588 | 0.4487  | 0.999883  |
| gene2073 | gene2073 | SACOL2080 | gi 57650036 ref NC_002951.2 :2146163-2146811 | MR150 | M36C05 | OK     | 16.4009 | 22.1719 | 0.434959   | -0.639012 | 0.52282 | 0.999883  |
| gene2074 | gene2074 | SACOL2081 | gi 57650036 ref NC_002951.2 :2146985-2147078 | MR150 | M36C05 | NOTEST | 0       | 0       | 0          | 0         | 1       | 1         |
| gene2075 | gene2075 | SACOL2082 | gi 57650036 ref NC_002951.2 :2147623-2148496 | MR150 | M36C05 | OK     | 208.177 | 87.6795 | -1.2475    | 1.52658   | 0.12687 | 0.707666  |
| gene2076 | gene2076 | thiE      | gi 57650036 ref NC_002951.2 :2148581-2149223 | MR150 | M36C05 | OK     | 2.07792 | 2.49705 | 0.265087   | -0.313731 | 0.75373 | 0.999883  |
| gene2077 | gene2077 | thiM      | gi 57650036 ref NC_002951.2 :2149224-2151512 | MR150 | M36C05 | OK     | 1.29313 | 2.60881 | 1.01252    | -0.796773 | 0.42558 | 0.999883  |
| gene2078 | gene2078 | thiD2     | gi 57650036 ref NC_002951.2 :2149224-2151512 | MR150 | M36C05 | OK     | 1.69855 | 2.62215 | 0.626447   | -0.553828 | 0.5797  | 0.999883  |
| gene2079 | gene2079 | SACOL2086 | gi 57650036 ref NC_002951.2 :2149224-2151512 | MR150 | M36C05 | OK     | 1.87452 | 1.80161 | -0.0572364 | 0.04125   | 0.9671  | 0.999883  |
| gene208  | gene208  | SACOL0214 | gi 57650036 ref NC_002951.2 :253141-254647   | MR150 | M36C05 | OK     | 146.358 | 70.4748 | -1.05432   | 1.23725   | 0.216   | 0.89416   |
| gene2080 | gene2080 | SACOL2088 | gi 57650036 ref NC_002951.2 :2151897-2152593 | MR150 | M36C05 | OK     | 32.4076 | 35.5956 | 0.135365   | -0.195936 | 0.84466 | 0.999883  |
| gene2081 | gene2081 | SACOL2089 | gi 57650036 ref NC_002951.2 :2152981-2153377 | MR150 | M36C05 | OK     | 2.32681 | 14.0053 | 2.58954    | -2.92542  | 0.00344 | 0.0849254 |
| gene2082 | gene2082 | ywpF      | gi 57650036 ref NC_002951.2 :2153570-2154011 | MR150 | M36C05 | OK     | 25.9819 | 54.0021 | 1.05551    | -1.54371  | 0.12266 | 0.695963  |
| gene2083 | gene2083 | fabZ      | gi 57650036 ref NC_002951.2 :2154069-2154510 | MR150 | M36C05 | OK     | 86.8176 | 142.327 | 0.713154   | -0.995809 | 0.31934 | 0.999883  |
| gene2084 | gene2084 | murAA     | gi 57650036 ref NC_002951.2 :2154543-2155809 | MR150 | M36C05 | OK     | 63.0701 | 151.715 | 1.26633    | -1.52613  | 0.12698 | 0.707666  |
| gene2085 | gene2085 | SACOL2093 | gi 57650036 ref NC_002951.2 :2155919-2156153 | MR150 | M36C05 | OK     | 139.741 | 160.013 | 0.195439   | -0.287289 | 0.77389 | 0.999883  |
| gene2086 | gene2086 | atpC      | gi 57650036 ref NC_002951.2 :2156714-2157119 | MR150 | M36C05 | OK     | 369.814 | 156.083 | -1.24448   | 1.63027   | 0.10304 | 0.644382  |
| gene2087 | gene2087 | atpD      | gi 57650036 ref NC_002951.2 :2157138-2158551 | MR150 | M36C05 | OK     | 201.01  | 104.054 | -0.94994   | 1.08115   | 0.27963 | 0.965951  |
| gene2088 | gene2088 | atpG      | gi 57650036 ref NC_002951.2 :2158572-2159439 | MR150 | M36C05 | OK     | 191.913 | 93.7609 | -1.0334    | 1.26799   | 0.2048  | 0.877017  |
| gene2089 | gene2089 | atpA      | gi 57650036 ref NC_002951.2 :2159469-2160978 | MR150 | M36C05 | OK     | 216.343 | 99.2805 | -1.12374   | 1.267     | 0.20515 | 0.877103  |
| gene209  | gene209  | SACOL0215 | gi 57650036 ref NC_002951.2 :254672-256244   | MR150 | M36C05 | OK     | 317.264 | 339.67  | 0.098451   | -0.102626 | 0.91826 | 0.999883  |
| gene2090 | gene2090 | atpH      | gi 57650036 ref NC_002951.2 :2160999-2162060 | MR150 | M36C05 | OK     | 175.522 | 89.3083 | -0.974789  | 0.920591  | 0.35726 | 0.999883  |
| gene2091 | gene2091 | atpF      | gi 57650036 ref NC_002951.2 :2160999-2162060 | MR150 | M36C05 | OK     | 144.922 | 68.9278 | -1.07212   | 0.881567  | 0.37801 | 0.999883  |
| gene2092 | gene2092 | atpE      | gi 57650036 ref NC_002951.2 :2162257-2162470 | MR150 | M36C05 | OK     | 534.947 | 249.303 | -1.10149   | 1.59583   | 0.11053 | 0.660511  |
| gene2093 | gene2093 | atpB      | gi 57650036 ref NC_002951.2 :2162512-2163241 | MR150 | M36C05 | OK     | 226.314 | 137.866 | -0.715061  | 0.873841  | 0.38221 | 0.999883  |
| gene2094 | gene2094 | SACOL2102 | gi 57650036 ref NC_002951.2 :2163261-2163615 | MR150 | M36C05 | OK     | 195.762 | 106.944 | -0.872253  | 1.23263   | 0.21771 | 0.89416   |
| gene2095 | gene2095 | SACOL2103 | gi 57650036 ref NC_002951.2 :2163781-2164909 | MR150 | M36C05 | OK     | 156.937 | 238.336 | 0.602809   | -0.684322 | 0.49377 | 0.999883  |
| gene2096 | gene2096 | upp       | gi 57650036 ref NC_002951.2 :2164932-2165562 | MR150 | M36C05 | OK     | 94.6895 | 183.531 | 0.95475    | -1.23375  | 0.2173  | 0.89416   |
| gene2097 | gene2097 | glyA      | gi 57650036 ref NC_002951.2 :2165589-2166828 | MR150 | M36C05 | OK     | 167.446 | 266.649 | 0.671247   | -0.746398 | 0.45543 | 0.999883  |
| gene2098 | gene2098 | SACOL2106 | gi 57650036 ref NC_002951.2 :2166854-2167379 | MR150 | M36C05 | OK     | 113.458 | 158.667 | 0.483845   | -0.644328 | 0.51936 | 0.999883  |
| gene2099 | gene2099 | SACOL2107 | gi 57650036 ref NC_002951.2 :2167485-2168957 | MR150 | M36C05 | OK     | 33.9653 | 10.0127 | -1.76223   | 1.44204   | 0.14929 | 0.750812  |
| gene21   | gene21   | yycG      | gi 57650036 ref NC_002951.2 :25665-28819     | MR150 | M36C05 | OK     | 114.382 | 126.81  | 0.148802   | -0.126938 | 0.89899 | 0.999883  |
| gene210  | gene210  | SACOL0216 | gi 57650036 ref NC_002951.2 :256690-257833   | MR150 | M36C05 | OK     | 9.41917 | 4.79372 | -0.974455  | 1.41897   | 0.15591 | 0.771231  |
| gene2100 | gene2100 | SACOL2108 | gi 57650036 ref NC_002951.2 :2167485-2168957 | MR150 | M36C05 | OK     | 12.3439 | 7.60009 | -0.699714  | 0.824218  | 0.40982 | 0.999883  |

|          |          |           |                                              |       |        |    |         |         |             |             |          |           |
|----------|----------|-----------|----------------------------------------------|-------|--------|----|---------|---------|-------------|-------------|----------|-----------|
| gene2101 | gene2101 | SACOL2109 | gi 57650036 ref NC_002951.2 :2169031-2170931 | MR150 | M36C05 | OK | 76.4364 | 21.6452 | -1.82021    | 1.70925     | 0.0874   | 0.593382  |
| gene2102 | gene2102 | prfA      | gi 57650036 ref NC_002951.2 :2169031-2170931 | MR150 | M36C05 | OK | 52.2101 | 14.2072 | -1.87771    | 1.69527     | 0.09002  | 0.602417  |
| gene2103 | gene2103 | tdk       | gi 57650036 ref NC_002951.2 :2170931-2171531 | MR150 | M36C05 | OK | 62.754  | 19.0424 | -1.72049    | 2.47387     | 0.01337  | 0.199029  |
| gene2104 | gene2104 | rpmE2     | gi 57650036 ref NC_002951.2 :2171877-2172132 | MR150 | M36C05 | OK | 700.567 | 75.7468 | -3.20927    | 4.42633     | 9.58E-06 | 0.0008119 |
| gene2105 | gene2105 | rho       | gi 57650036 ref NC_002951.2 :2172249-2173566 | MR150 | M36C05 | OK | 132.586 | 45.5961 | -1.53994    | 1.89092     | 0.05864  | 0.484963  |
| gene2106 | gene2106 | SACOL2114 | gi 57650036 ref NC_002951.2 :2173812-2175240 | MR150 | M36C05 | OK | 42.0309 | 566.421 | 3.75235     | -4.27844    | 1.88E-05 | 0.001362  |
| gene2107 | gene2107 | SACOL2115 | gi 57650036 ref NC_002951.2 :2175477-2175813 | MR150 | M36C05 | OK | 1077.9  | 871.614 | -0.306465   | 0.358547    | 0.71993  | 0.999883  |
| gene2108 | gene2108 | murAB     | gi 57650036 ref NC_002951.2 :2175901-2177161 | MR150 | M36C05 | OK | 82.7874 | 71.8669 | -0.204084   | 0.25366     | 0.79976  | 0.999883  |
| gene2109 | gene2109 | fbaA      | gi 57650036 ref NC_002951.2 :2177626-2178487 | MR150 | M36C05 | OK | 194.581 | 134.828 | -0.529251   | 0.636625    | 0.52437  | 0.999883  |
| gene211  | gene211  | SACOL0217 | gi 57650036 ref NC_002951.2 :258146-259622   | MR150 | M36C05 | OK | 14.4036 | 12.5261 | -0.201501   | 0.2914      | 0.77075  | 0.999883  |
| gene2110 | gene2110 | SACOL2118 | gi 57650036 ref NC_002951.2 :2178704-2179226 | MR150 | M36C05 | OK | 33.7359 | 9.25895 | -1.86536    | 2.66914     | 0.0076   | 0.141199  |
| gene2111 | gene2111 | pyrG      | gi 57650036 ref NC_002951.2 :2179334-2180945 | MR150 | M36C05 | OK | 40.706  | 9.21773 | -2.14276    | 2.9372      | 0.00331  | 0.082366  |
| gene2112 | gene2112 | rpoE      | gi 57650036 ref NC_002951.2 :2181280-2181811 | MR150 | M36C05 | OK | 106.321 | 45.0353 | -1.2393     | 1.74241     | 0.08144  | 0.568124  |
| gene2113 | gene2113 | SACOL2121 | gi 57650036 ref NC_002951.2 :2181922-2182783 | MR150 | M36C05 | OK | 33.3567 | 14.0167 | -1.25082    | 1.8096      | 0.07036  | 0.522414  |
| gene2114 | gene2114 | SACOL2122 | gi 57650036 ref NC_002951.2 :2183206-2184010 | MR150 | M36C05 | OK | 21.0397 | 6.20962 | -1.76054    | 2.54079     | 0.01106  | 0.177478  |
| gene2115 | gene2115 | SACOL2123 | gi 57650036 ref NC_002951.2 :2184139-2184811 | MR150 | M36C05 | OK | 47.0272 | 23.1467 | -1.02269    | 1.4779      | 0.13943  | 0.736061  |
| gene2116 | gene2116 | SACOL2124 | gi 57650036 ref NC_002951.2 :2185209-2187587 | MR150 | M36C05 | OK | 48.0699 | 35.0494 | -0.455744   | 0.421084    | 0.67369  | 0.999883  |
| gene2117 | gene2117 | SACOL2125 | gi 57650036 ref NC_002951.2 :2185209-2187587 | MR150 | M36C05 | OK | 28.9188 | 39.0636 | 0.433818    | -0.359917   | 0.71891  | 0.999883  |
| gene2118 | gene2118 | luxS      | gi 57650036 ref NC_002951.2 :2187897-2188368 | MR150 | M36C05 | OK | 88.5729 | 108.761 | 0.296225    | -0.414843   | 0.67826  | 0.999883  |
| gene2119 | gene2119 | SACOL2127 | gi 57650036 ref NC_002951.2 :2188519-2188870 | MR150 | M36C05 | OK | 283.623 | 270.802 | -0.0667393  | 0.089045    | 0.92905  | 0.999883  |
| gene212  | gene212  | SACOL0218 | gi 57650036 ref NC_002951.2 :259819-260176   | MR150 | M36C05 | OK | 6.69732 | 6.2204  | -0.106577   | 0.126865    | 0.89905  | 0.999883  |
| gene2120 | gene2120 | pdp       | gi 57650036 ref NC_002951.2 :2188883-2190185 | MR150 | M36C05 | OK | 110.347 | 119.044 | 0.109452    | -0.12913    | 0.89725  | 0.999883  |
| gene2121 | gene2121 | deoC2     | gi 57650036 ref NC_002951.2 :2190463-2191126 | MR150 | M36C05 | OK | 74.7211 | 74.3678 | -0.006838   | 0.00933     | 0.99256  | 0.999883  |
| gene2122 | gene2122 | deoD      | gi 57650036 ref NC_002951.2 :2191440-2192151 | MR150 | M36C05 | OK | 124.33  | 67.1545 | -0.888621   | 1.17372     | 0.24051  | 0.911371  |
| gene2123 | gene2123 | SACOL2131 | gi 57650036 ref NC_002951.2 :2192271-2192715 | MR150 | M36C05 | OK | 2855.22 | 1778.93 | -0.682595   | 0.705725    | 0.48036  | 0.999883  |
| gene2124 | gene2124 | SACOL2132 | gi 57650036 ref NC_002951.2 :2192914-2193328 | MR150 | M36C05 | OK | 5.69732 | 28.8047 | 2.33795     | -3.1154     | 0.00184  | 0.0540416 |
| gene2125 | gene2125 | SACOL2133 | gi 57650036 ref NC_002951.2 :2193785-2195159 | MR150 | M36C05 | OK | 36.2666 | 30.235  | -0.262422   | 0.353575    | 0.72366  | 0.999883  |
| gene2126 | gene2126 | SACOL2134 | gi 57650036 ref NC_002951.2 :2195830-2196061 | MR150 | M36C05 | OK | 23.316  | 6.25566 | -1.89809    | 1.93264     | 0.05328  | 0.45686   |
| gene2127 | gene2127 | manA1     | gi 57650036 ref NC_002951.2 :2196091-2197030 | MR150 | M36C05 | OK | 45.9999 | 22.385  | -1.0391     | 1.46083     | 0.14406  | 0.743774  |
| gene2128 | gene2128 | SACOL2136 | gi 57650036 ref NC_002951.2 :2197464-2198130 | MR150 | M36C05 | OK | 10.1834 | 170.274 | 4.06357     | -5.42923    | 5.66E-08 | 1.02E-05  |
| gene2129 | gene2129 | czrA      | gi 57650036 ref NC_002951.2 :2198281-2198602 | MR150 | M36C05 | OK | 62.7582 | 13.0742 | -2.26308    | 3.11268     | 0.00185  | 0.0543209 |
| gene213  | gene213  | SACOL0219 | gi 57650036 ref NC_002951.2 :260332-260506   | MR150 | M36C05 | OK | 0       | 6.93814 | 1.79769e+30 | 1.79769e+30 | 0.14732  | 0.743774  |
| gene2130 | gene2130 | SACOL2138 | gi 57650036 ref NC_002951.2 :2198603-2199584 | MR150 | M36C05 | OK | 40.5863 | 19.6267 | -1.04818    | 1.48159     | 0.13845  | 0.733494  |

|          |          |             |                                              |       |        |        |         |         |                        |           |          |           |
|----------|----------|-------------|----------------------------------------------|-------|--------|--------|---------|---------|------------------------|-----------|----------|-----------|
| gene2131 | gene2131 | SACOL2139   | gi 57650036 ref NC_002951.2 :2199793-2200941 | MR150 | M36C05 | NOTEST | 0       | 0       | 0                      | 0         | 1        | 1         |
| gene2132 | gene2132 | SACOL2140   | gi 57650036 ref NC_002951.2 :2199793-2200941 | MR150 | M36C05 | OK     | 133.872 | 160.442 | 0.261193               | -0.302013 | 0.76264  | 0.999883  |
| gene2133 | gene2133 | SACOL2141   | gi 57650036 ref NC_002951.2 :2201903-2202107 | MR150 | M36C05 | OK     | 4.59906 | 3.28328 | -0.486204              | 0.269378  | 0.78764  | 0.999883  |
| gene2134 | gene2134 | SACOL2142   | gi 57650036 ref NC_002951.2 :2202165-2203302 | MR150 | M36C05 | OK     | 13.8923 | 11.1786 | -0.313549              | 0.459456  | 0.64591  | 0.999883  |
| gene2135 | gene2135 | SACOL2143   | gi 57650036 ref NC_002951.2 :2204387-2205257 | MR150 | M36C05 | OK     | 43.4214 | 51.362  | 0.242293               | -0.333567 | 0.73871  | 0.999883  |
| gene2136 | gene2136 | SACOL2144   | gi 57650036 ref NC_002951.2 :2205312-2206095 | MR150 | M36C05 | OK     | 6.04016 | 10.975  | 0.861563               | -1.24078  | 0.21469  | 0.89416   |
| gene2137 | gene2137 | glmS        | gi 57650036 ref NC_002951.2 :2206326-2208132 | MR150 | M36C05 | OK     | 37.2906 | 34.1073 | -0.12873               | 0.166718  | 0.86759  | 0.999883  |
| gene2138 | gene2138 | SACOL2146   | gi 57650036 ref NC_002951.2 :2208812-2210351 | MR150 | M36C05 | OK     | 2.40207 | 4.69221 | 0.965987               | -1.38525  | 0.16598  | 0.79971   |
| gene2139 | gene2139 | SACOL2147   | gi 57650036 ref NC_002951.2 :2210385-2212518 | MR150 | M36C05 | OK     | 2.69422 | 24.116  | 3.16206                | -4.37361  | 1.22E-05 | 0.000931  |
| gene214  | gene214  | SACOL0220   | gi 57650036 ref NC_002951.2 :260531-261677   | MR150 | M36C05 | OK     | 72.0387 | 76.9222 | 0.0946291              | -0.119734 | 0.90469  | 0.999883  |
| gene2140 | gene2140 | SACOL2148   | gi 57650036 ref NC_002951.2 :2212529-2214070 | MR150 | M36C05 | OK     | 7.14632 | 234.593 | 5.03681                | -3.41744  | 0.00063  | 0.0243336 |
| gene2141 | gene2141 | mtlD        | gi 57650036 ref NC_002951.2 :2212529-2214070 | MR150 | M36C05 | OK     | 5.74065 | 131.655 | 4.5194                 | -4.84056  | 1.29E-06 | 0.0001378 |
| gene2142 | gene2142 | fmtB        | gi 57650036 ref NC_002951.2 :2214388-2221825 | MR150 | M36C05 | OK     | 1.92633 | 2.58789 | 0.425924               | -0.617244 | 0.53707  | 0.999883  |
| gene2143 | gene2143 | glmM        | gi 57650036 ref NC_002951.2 :2222101-2223457 | MR150 | M36C05 | OK     | 90.4881 | 92.0231 | 0.0242688              | -0.02925  | 0.97667  | 0.999883  |
| gene2144 | gene2144 | SACOL2152   | gi 57650036 ref NC_002951.2 :2223483-2224416 | MR150 | M36C05 | OK     | 35.0955 | 31.1444 | -0.172313              | 0.243447  | 0.80766  | 0.999883  |
| gene2145 | gene2145 | SACOL2153   | gi 57650036 ref NC_002951.2 :2224417-2225227 | MR150 | M36C05 | OK     | 75.0486 | 72.6964 | -0.0459413             | 0.060968  | 0.95139  | 0.999883  |
| gene2146 | gene2146 | rocF        | gi 57650036 ref NC_002951.2 :2225415-2226324 | MR150 | M36C05 | OK     | 247.069 | 351.866 | 0.510112               | -0.570049 | 0.56865  | 0.999883  |
| gene2147 | gene2147 | SACOL2155   | gi 57650036 ref NC_002951.2 :2226549-2227752 | MR150 | M36C05 | NOTEST | 0.76344 | 0.76944 | 0.0112879              | -0.01259  | 0.98996  | 1         |
| gene2149 | gene2149 | SACOL_tRNA- | gi 57650036 ref NC_002951.2 :2228058-2228133 | MR150 | M36C05 | NOTEST | 0       | 0       | 0                      | 0         | 1        | 1         |
| gene215  | gene215  | ldh1        | gi 57650036 ref NC_002951.2 :262249-263203   | MR150 | M36C05 | OK     | 6.90495 | 38.4666 | 2.47791                | -3.51875  | 0.00043  | 0.0181379 |
| gene2150 | gene2150 | SACOL_tRNA- | gi 57650036 ref NC_002951.2 :2228142-2228226 | MR150 | M36C05 | NOTEST | 0       | 0       | 0                      | 0         | 1        | 1         |
| gene2151 | gene2151 | SACOL_tRNA- | gi 57650036 ref NC_002951.2 :2228255-2228331 | MR150 | M36C05 | OK     | #####   | 0       | -1.79769e+3(-1.79769e+ | 0.10824   | 0.653986 |           |
| gene2152 | gene2152 | SACOL_tRNA- | gi 57650036 ref NC_002951.2 :2228338-2228410 | MR150 | M36C05 | NOTEST | 0       | 0       | 0                      | 0         | 1        | 1         |
| gene2153 | gene2153 | SACOL_tRNA- | gi 57650036 ref NC_002951.2 :2228411-2228486 | MR150 | M36C05 | NOTEST | 0       | 0       | 0                      | 0         | 1        | 1         |
| gene2154 | gene2154 | rffF        | gi 57650036 ref NC_002951.2 :2228496-2228611 | MR150 | M36C05 | OK     | 485395  | 306801  | -0.661857              | 0.769145  | 0.44181  | 0.999883  |
| gene2155 | gene2155 | rrfF        | gi 57650036 ref NC_002951.2 :2228683-2231606 | MR150 | M36C05 | HIDATA | 51023.7 | 0       | 0                      | 0         | 1        | 1         |
| gene2156 | gene2156 | rrsF        | gi 57650036 ref NC_002951.2 :2232152-2233707 | MR150 | M36C05 | OK     | 15148.8 | 12926.1 | -0.228922              | 0.335983  | 0.73688  | 0.999883  |
| gene2157 | gene2157 | SACOL2156   | gi 57650036 ref NC_002951.2 :2234162-2235227 | MR150 | M36C05 | OK     | 300.786 | 220.147 | -0.450273              | 0.500005  | 0.61707  | 0.999883  |
| gene2158 | gene2158 | SACOL2157   | gi 57650036 ref NC_002951.2 :2235374-2236817 | MR150 | M36C05 | OK     | 25.8754 | 41.5917 | 0.684716               | -0.917989 | 0.35863  | 0.999883  |
| gene2159 | gene2159 | SACOL2158   | gi 57650036 ref NC_002951.2 :2237138-2237612 | MR150 | M36C05 | OK     | 116.626 | 36.6643 | -1.66945               | 2.37073   | 0.01775  | 0.241958  |
| gene216  | gene216  | SACOL0223   | gi 57650036 ref NC_002951.2 :263370-263496   | MR150 | M36C05 | NOTEST | 0       | 0       | 0                      | 0         | 1        | 1         |
| gene2160 | gene2160 | SACOL2159   | gi 57650036 ref NC_002951.2 :2237710-2239054 | MR150 | M36C05 | OK     | 25.5702 | 10.6962 | -1.25737               | 1.79132   | 0.07324  | 0.531113  |
| gene2161 | gene2161 | SACOL2160   | gi 57650036 ref NC_002951.2 :2239230-2239914 | MR150 | M36C05 | OK     | 154.982 | 81.8513 | -0.921027              | 1.19557   | 0.23187  | 0.902162  |

|          |          |           |                                              |       |        |        |         |         |           |           |          |           |
|----------|----------|-----------|----------------------------------------------|-------|--------|--------|---------|---------|-----------|-----------|----------|-----------|
| gene2162 | gene2162 | SACOL2161 | gi 57650036 ref NC_002951.2 :2239932-2241120 | MR150 | M36C05 | OK     | 147.565 | 142.166 | -0.05378  | 0.062556  | 0.95012  | 0.999883  |
| gene2163 | gene2163 | SACOL2162 | gi 57650036 ref NC_002951.2 :2241163-2241679 | MR150 | M36C05 | OK     | 144.761 | 94.6975 | -0.612272 | 0.82902   | 0.40709  | 0.999883  |
| gene2164 | gene2164 | SACOL2163 | gi 57650036 ref NC_002951.2 :2241856-2242117 | MR150 | M36C05 | OK     | 2716.48 | 659.379 | -2.04256  | 2.46042   | 0.01388  | 0.204544  |
| gene2165 | gene2165 | SACOL2164 | gi 57650036 ref NC_002951.2 :2242248-2243619 | MR150 | M36C05 | OK     | 74.4193 | 10.7318 | -2.79379  | 3.72621   | 0.00019  | 0.0097688 |
| gene2166 | gene2166 | SACOL2165 | gi 57650036 ref NC_002951.2 :2243854-2245851 | MR150 | M36C05 | OK     | 8.96072 | 2.72469 | -1.71752  | 1.80806   | 0.0706   | 0.522414  |
| gene2167 | gene2167 | SACOL2166 | gi 57650036 ref NC_002951.2 :2243854-2245851 | MR150 | M36C05 | OK     | 4.96951 | 3.0483  | -0.705098 | 0.685006  | 0.49334  | 0.999883  |
| gene2168 | gene2168 | SACOL2167 | gi 57650036 ref NC_002951.2 :2245862-2246846 | MR150 | M36C05 | OK     | 25.3915 | 7.0329  | -1.85215  | 2.67699   | 0.00743  | 0.13928   |
| gene2169 | gene2169 | SACOL2168 | gi 57650036 ref NC_002951.2 :2247237-2248308 | MR150 | M36C05 | OK     | 3.69218 | 14.5584 | 1.9793    | -2.83828  | 0.00454  | 0.0991698 |
| gene217  | gene217  | SACOL0224 | gi 57650036 ref NC_002951.2 :263522-265052   | MR150 | M36C05 | OK     | 1.3819  | 2.98357 | 1.11039   | -1.52197  | 0.12802  | 0.7083    |
| gene2170 | gene2170 | SACOL2169 | gi 57650036 ref NC_002951.2 :2248314-2251252 | MR150 | M36C05 | OK     | 4.71888 | 22.3544 | 2.24405   | -2.89741  | 0.00376  | 0.0904646 |
| gene2171 | gene2171 | SACOL2170 | gi 57650036 ref NC_002951.2 :2248314-2251252 | MR150 | M36C05 | OK     | 2.00291 | 3.88206 | 0.954721  | -0.486774 | 0.62642  | 0.999883  |
| gene2172 | gene2172 | SACOL2171 | gi 57650036 ref NC_002951.2 :2251353-2253330 | MR150 | M36C05 | OK     | 15.6016 | 8.37261 | -0.897945 | 1.27901   | 0.20089  | 0.869538  |
| gene2173 | gene2173 | SACOL2172 | gi 57650036 ref NC_002951.2 :2253785-2255410 | MR150 | M36C05 | OK     | 0.32245 | 1.46962 | 2.1883    | -2.44523  | 0.01448  | 0.208278  |
| gene2174 | gene2174 | SACOL2173 | gi 57650036 ref NC_002951.2 :2255445-2255955 | MR150 | M36C05 | OK     | 508.79  | 13085   | 4.6847    | -5.22328  | 1.76E-07 | 2.77E-05  |
| gene2175 | gene2175 | SACOL2174 | gi 57650036 ref NC_002951.2 :2256017-2256257 | MR150 | M36C05 | OK     | 159.965 | 2213.51 | 3.79051   | -4.91741  | 8.77E-07 | 0.0001076 |
| gene2176 | gene2176 | SACOL2175 | gi 57650036 ref NC_002951.2 :2256269-2256818 | MR150 | M36C05 | OK     | 95.149  | 3337.43 | 5.1324    | -5.95411  | 2.61E-09 | 7.57E-07  |
| gene2177 | gene2177 | opuD2     | gi 57650036 ref NC_002951.2 :2256980-2258543 | MR150 | M36C05 | OK     | 17.867  | 634.337 | 5.14988   | -6.02188  | 1.72E-09 | 5.42E-07  |
| gene2178 | gene2178 | SACOL2177 | gi 57650036 ref NC_002951.2 :2258849-2259851 | MR150 | M36C05 | OK     | 22.5306 | 35.3369 | 0.649289  | -0.920001 | 0.35757  | 0.999883  |
| gene2179 | gene2179 | SACOL2178 | gi 57650036 ref NC_002951.2 :2260084-2261086 | MR150 | M36C05 | OK     | 215.568 | 328.07  | 0.605856  | -0.675661 | 0.49926  | 0.999883  |
| gene218  | gene218  | SACOL0225 | gi 57650036 ref NC_002951.2 :265413-266349   | MR150 | M36C05 | OK     | 10.6106 | 9.29021 | -0.191722 | 0.28145   | 0.77837  | 0.999883  |
| gene2180 | gene2180 | SACOL2179 | gi 57650036 ref NC_002951.2 :2261368-2262238 | MR150 | M36C05 | OK     | 64.218  | 106.675 | 0.73217   | -0.949486 | 0.34237  | 0.999883  |
| gene2181 | gene2181 | lacG      | gi 57650036 ref NC_002951.2 :2262503-2263916 | MR150 | M36C05 | OK     | 3.66161 | 2.99892 | -0.288034 | 0.41212   | 0.68025  | 0.999883  |
| gene2182 | gene2182 | lacE      | gi 57650036 ref NC_002951.2 :2263933-2265963 | MR150 | M36C05 | OK     | 1.31083 | 2.97493 | 1.18237   | -1.59834  | 0.10997  | 0.659073  |
| gene2183 | gene2183 | lacF      | gi 57650036 ref NC_002951.2 :2263933-2265963 | MR150 | M36C05 | OK     | 1.2884  | 0.92991 | -0.470408 | 0.122222  | 0.90272  | 0.999883  |
| gene2184 | gene2184 | lacD      | gi 57650036 ref NC_002951.2 :2265984-2266965 | MR150 | M36C05 | OK     | 1.17641 | 0.98839 | -0.25124  | 0.285956  | 0.77491  | 0.999883  |
| gene2185 | gene2185 | lacC      | gi 57650036 ref NC_002951.2 :2266968-2267901 | MR150 | M36C05 | OK     | 0.83561 | 1.05319 | 0.333872  | -0.362093 | 0.71728  | 0.999883  |
| gene2186 | gene2186 | lacB      | gi 57650036 ref NC_002951.2 :2267913-2268429 | MR150 | M36C05 | NOTEST | 0.48415 | 0.69887 | 0.52958   | -0.348426 | 0.72752  | 1         |
| gene2187 | gene2187 | SACOL2186 | gi 57650036 ref NC_002951.2 :2268444-2268873 | MR150 | M36C05 | OK     | 0.66642 | 1.9252  | 1.53051   | -1.11087  | 0.26662  | 0.949974  |
| gene2188 | gene2188 | SACOL2187 | gi 57650036 ref NC_002951.2 :2268887-2269004 | MR150 | M36C05 | NOTEST | 0       | 0       | 0         | 0         | 1        | 1         |
| gene2189 | gene2189 | lacR      | gi 57650036 ref NC_002951.2 :2269240-2269996 | MR150 | M36C05 | OK     | 16.5216 | 17.66   | 0.096136  | -0.141341 | 0.8876   | 0.999883  |
| gene219  | gene219  | SACOL0228 | gi 57650036 ref NC_002951.2 :266687-269236   | MR150 | M36C05 | NOTEST | 0.32298 | 0.92951 | 1.52502   | -1.63727  | 0.10157  | 1         |
| gene2190 | gene2190 | SACOL2189 | gi 57650036 ref NC_002951.2 :2270246-2270978 | MR150 | M36C05 | OK     | 21.2952 | 24.8872 | 0.224875  | -0.329223 | 0.74199  | 0.999883  |
| gene2191 | gene2191 | SACOL2190 | gi 57650036 ref NC_002951.2 :2271268-2271877 | MR150 | M36C05 | OK     | 0.74847 | 3.23871 | 2.1134    | -2.11171  | 0.03471  | 0.357338  |

|          |          |           |                                              |       |        |        |         |         |            |           |          |           |
|----------|----------|-----------|----------------------------------------------|-------|--------|--------|---------|---------|------------|-----------|----------|-----------|
| gene2192 | gene2192 | SACOL2191 | gi 57650036 ref NC_002951.2 :2272138-2272264 | MR150 | M36C05 | NOTEST | 0       | 0       | 0          | 0         | 1        | 1         |
| gene2193 | gene2193 | SACOL2192 | gi 57650036 ref NC_002951.2 :2272483-2273332 | MR150 | M36C05 | OK     | 80.9221 | 218.223 | 1.4312     | -1.75992  | 0.07842  | 0.55661   |
| gene2194 | gene2194 | SACOL2193 | gi 57650036 ref NC_002951.2 :2273401-2273818 | MR150 | M36C05 | OK     | 3.51272 | 12.1779 | 1.79361    | -2.19913  | 0.02787  | 0.315942  |
| gene2195 | gene2195 | hysA      | gi 57650036 ref NC_002951.2 :2274225-2276649 | MR150 | M36C05 | OK     | 0.551   | 3.02251 | 2.45562    | -3.27543  | 0.00106  | 0.0358462 |
| gene2196 | gene2196 | SACOL2195 | gi 57650036 ref NC_002951.2 :2276708-2277563 | MR150 | M36C05 | OK     | 21.9739 | 20.8812 | -0.0735851 | 0.10731   | 0.91454  | 0.999883  |
| gene2197 | gene2197 | SACOL2196 | gi 57650036 ref NC_002951.2 :2277773-2278589 | MR150 | M36C05 | OK     | 10.9364 | 15.9375 | 0.543282   | -0.797494 | 0.42516  | 0.999883  |
| gene2198 | gene2198 | SACOL2197 | gi 57650036 ref NC_002951.2 :2278882-2279308 | MR150 | M36C05 | OK     | 8.77649 | 463.694 | 5.72339    | -7.2392   | 4.51E-13 | 4.08E-10  |
| gene2199 | gene2199 | budA1     | gi 57650036 ref NC_002951.2 :2279671-2280376 | MR150 | M36C05 | OK     | 1.81889 | 2.40351 | 0.402087   | -0.480108 | 0.63115  | 0.999883  |
| gene22   | gene22   | yycH      | gi 57650036 ref NC_002951.2 :25665-28819     | MR150 | M36C05 | OK     | 100.663 | 102.08  | 0.0201691  | -0.01318  | 0.98948  | 0.999883  |
| gene220  | gene220  | SACOL0229 | gi 57650036 ref NC_002951.2 :266687-269236   | MR150 | M36C05 | NOTEST | 0.57043 | 0.41188 | -0.469819  | 0.167656  | 0.86685  | 1         |
| gene2200 | gene2200 | budB      | gi 57650036 ref NC_002951.2 :2280412-2282077 | MR150 | M36C05 | OK     | 3.34557 | 3.837   | 0.197725   | -0.287302 | 0.77388  | 0.999883  |
| gene2201 | gene2201 | SACOL2200 | gi 57650036 ref NC_002951.2 :2282356-2282452 | MR150 | M36C05 | NOTEST | 0       | 0       | 0          | 0         | 1        | 1         |
| gene2202 | gene2202 | SACOL2201 | gi 57650036 ref NC_002951.2 :2283266-2283866 | MR150 | M36C05 | OK     | 16.4538 | 8.55529 | -0.943533  | 1.35755   | 0.17461  | 0.821477  |
| gene2203 | gene2203 | SACOL2202 | gi 57650036 ref NC_002951.2 :2283898-2284672 | MR150 | M36C05 | OK     | 9.33557 | 8.6488  | -0.110238  | 0.160072  | 0.87283  | 0.999883  |
| gene2204 | gene2204 | SACOL2203 | gi 57650036 ref NC_002951.2 :2284800-2285937 | MR150 | M36C05 | OK     | 12.7482 | 14.238  | 0.159448   | -0.233272 | 0.81555  | 0.999883  |
| gene2205 | gene2205 | SACOL2204 | gi 57650036 ref NC_002951.2 :2285937-2286729 | MR150 | M36C05 | OK     | 15.5175 | 21.8022 | 0.490572   | -0.719363 | 0.47192  | 0.999883  |
| gene2206 | gene2206 | SACOL2205 | gi 57650036 ref NC_002951.2 :2286768-2288129 | MR150 | M36C05 | OK     | 1.58299 | 5.41214 | 1.77355    | -2.45615  | 0.01404  | 0.204943  |
| gene2207 | gene2207 | rpsI      | gi 57650036 ref NC_002951.2 :2288673-2289072 | MR150 | M36C05 | OK     | 726.849 | 123.658 | -2.5553    | 3.23929   | 0.0012   | 0.0391064 |
| gene2208 | gene2208 | rplM      | gi 57650036 ref NC_002951.2 :2289085-2289523 | MR150 | M36C05 | OK     | 225.198 | 35.2143 | -2.67696   | 3.6933    | 0.00022  | 0.0106092 |
| gene2209 | gene2209 | truA      | gi 57650036 ref NC_002951.2 :2289762-2290566 | MR150 | M36C05 | OK     | 19.2653 | 17.8983 | -0.10618   | 0.15578   | 0.87621  | 0.999883  |
| gene221  | gene221  | SACOL0230 | gi 57650036 ref NC_002951.2 :269258-269537   | MR150 | M36C05 | OK     | 1.69174 | 1.21621 | -0.476116  | 0.263789  | 0.79194  | 0.999883  |
| gene2210 | gene2210 | SACOL2209 | gi 57650036 ref NC_002951.2 :2290570-2293033 | MR150 | M36C05 | OK     | 24.7194 | 28.5319 | 0.206934   | -0.146721 | 0.88335  | 0.999883  |
| gene2211 | gene2211 | cbiO      | gi 57650036 ref NC_002951.2 :2290570-2293033 | MR150 | M36C05 | OK     | 28.0289 | 28.5341 | 0.0257719  | -0.019666 | 0.98431  | 0.999883  |
| gene2212 | gene2212 | cbiO      | gi 57650036 ref NC_002951.2 :2290570-2293033 | MR150 | M36C05 | OK     | 29.8688 | 34.359  | 0.202046   | -0.157727 | 0.87467  | 0.999883  |
| gene2213 | gene2213 | rplQ      | gi 57650036 ref NC_002951.2 :2293570-2293939 | MR150 | M36C05 | OK     | 159.892 | 156.793 | -0.0282295 | 0.039481  | 0.96851  | 0.999883  |
| gene2214 | gene2214 | rpoA      | gi 57650036 ref NC_002951.2 :2293955-2294900 | MR150 | M36C05 | OK     | 196.701 | 201.617 | 0.0356138  | -0.04126  | 0.96709  | 0.999883  |
| gene2215 | gene2215 | rpsK      | gi 57650036 ref NC_002951.2 :2294974-2295364 | MR150 | M36C05 | OK     | 218.972 | 193.95  | -0.175059  | 0.235522  | 0.8138   | 0.999883  |
| gene2216 | gene2216 | rpsM      | gi 57650036 ref NC_002951.2 :2295387-2295753 | MR150 | M36C05 | OK     | 142.617 | 141.079 | -0.0156345 | 0.022122  | 0.98235  | 0.999883  |
| gene2217 | gene2217 | rpmJ      | gi 57650036 ref NC_002951.2 :2295775-2295889 | MR150 | M36C05 | OK     | 2081.26 | 910.472 | -1.19277   | 1.14558   | 0.25197  | 0.92853   |
| gene2218 | gene2218 | infA      | gi 57650036 ref NC_002951.2 :2295920-2296139 | MR150 | M36C05 | OK     | 237.941 | 220.119 | -0.112321  | 0.165057  | 0.8689   | 0.999883  |
| gene2219 | gene2219 | adk       | gi 57650036 ref NC_002951.2 :2296331-2296979 | MR150 | M36C05 | OK     | 175.968 | 143.378 | -0.295485  | 0.373332  | 0.7089   | 0.999883  |
| gene222  | gene222  | SACOL0231 | gi 57650036 ref NC_002951.2 :269601-269736   | MR150 | M36C05 | NOTEST | 0       | 0       | 0          | 0         | 1        | 1         |
| gene2220 | gene2220 | secY      | gi 57650036 ref NC_002951.2 :2296995-2298728 | MR150 | M36C05 | OK     | 282.762 | 251.65  | -0.168172  | 0.155072  | 0.87676  | 0.999883  |



|          |          |           |                                              |       |        |        |         |         |           |           |         |          |
|----------|----------|-----------|----------------------------------------------|-------|--------|--------|---------|---------|-----------|-----------|---------|----------|
| gene2221 | gene2221 | rplO      | gi 57650036 ref NC_002951.2 :2296995-2298728 | MR150 | M36C05 | OK     | 352.974 | 379.845 | 0.10585   | -0.053764 | 0.95712 | 0.999883 |
| gene2222 | gene2222 | rpmD      | gi 57650036 ref NC_002951.2 :2298744-2298924 | MR150 | M36C05 | OK     | 739.213 | 279.463 | -1.40333  | 2.04396   | 0.04096 | 0.394682 |
| gene2223 | gene2223 | rpsE      | gi 57650036 ref NC_002951.2 :2298940-2299441 | MR150 | M36C05 | OK     | 193.115 | 101.984 | -0.921122 | 1.22972   | 0.2188  | 0.89416  |
| gene2224 | gene2224 | rplR      | gi 57650036 ref NC_002951.2 :2299461-2299821 | MR150 | M36C05 | OK     | 336.563 | 244.485 | -0.46113  | 0.609762  | 0.54202 | 0.999883 |
| gene2225 | gene2225 | rplF      | gi 57650036 ref NC_002951.2 :2299851-2300388 | MR150 | M36C05 | OK     | 310.574 | 122.214 | -1.34553  | 1.70566   | 0.08807 | 0.596796 |
| gene2226 | gene2226 | rpsH      | gi 57650036 ref NC_002951.2 :2300412-2300811 | MR150 | M36C05 | OK     | 236.169 | 77.8385 | -1.60126  | 2.21281   | 0.02691 | 0.309278 |
| gene2227 | gene2227 | rpsN      | gi 57650036 ref NC_002951.2 :2300842-2301028 | MR150 | M36C05 | OK     | 76.7981 | 39.7175 | -0.951294 | 1.15964   | 0.2462  | 0.920358 |
| gene2228 | gene2228 | rplE      | gi 57650036 ref NC_002951.2 :2301050-2301590 | MR150 | M36C05 | OK     | 217.378 | 81.8388 | -1.40935  | 1.86216   | 0.06258 | 0.504373 |
| gene2229 | gene2229 | rplX      | gi 57650036 ref NC_002951.2 :2301616-2301934 | MR150 | M36C05 | OK     | 233.036 | 96.1547 | -1.27712  | 1.82105   | 0.0686  | 0.522414 |
| gene223  | gene223  | SACOL0232 | gi 57650036 ref NC_002951.2 :269763-271023   | MR150 | M36C05 | OK     | 1.58929 | 1.35205 | -0.233227 | 0.299396  | 0.76464 | 0.999883 |
| gene2230 | gene2230 | rplN      | gi 57650036 ref NC_002951.2 :2301969-2302338 | MR150 | M36C05 | OK     | 243.857 | 95.4956 | -1.35253  | 1.87999   | 0.06011 | 0.493207 |
| gene2231 | gene2231 | rpsQ      | gi 57650036 ref NC_002951.2 :2302369-2302633 | MR150 | M36C05 | OK     | 275.992 | 106.772 | -1.3701   | 1.98377   | 0.04728 | 0.426221 |
| gene2232 | gene2232 | rpmC      | gi 57650036 ref NC_002951.2 :2302656-2303290 | MR150 | M36C05 | OK     | 221.051 | 64.3363 | -1.78067  | 0.58562   | 0.55813 | 0.999883 |
| gene2233 | gene2233 | rplP      | gi 57650036 ref NC_002951.2 :2302656-2303290 | MR150 | M36C05 | OK     | 344.323 | 193.304 | -0.832887 | 1.01979   | 0.30783 | 0.991033 |
| gene2234 | gene2234 | rpsC      | gi 57650036 ref NC_002951.2 :2303292-2303946 | MR150 | M36C05 | OK     | 292.666 | 138.806 | -1.07619  | 1.31693   | 0.18786 | 0.844443 |
| gene2235 | gene2235 | rplV      | gi 57650036 ref NC_002951.2 :2303969-2304323 | MR150 | M36C05 | OK     | 210.371 | 89.3542 | -1.23533  | 1.7448    | 0.08102 | 0.567059 |
| gene2236 | gene2236 | rpsS      | gi 57650036 ref NC_002951.2 :2304351-2304630 | MR150 | M36C05 | OK     | 250.378 | 116.756 | -1.10061  | 1.58954   | 0.11194 | 0.664916 |
| gene2237 | gene2237 | rplB      | gi 57650036 ref NC_002951.2 :2304696-2305530 | MR150 | M36C05 | OK     | 322.165 | 131.704 | -1.2905   | 1.51694   | 0.12928 | 0.7118   |
| gene2238 | gene2238 | rplW      | gi 57650036 ref NC_002951.2 :2305562-2306461 | MR150 | M36C05 | OK     | 168.729 | 81.2578 | -1.05413  | 0.464204  | 0.6425  | 0.999883 |
| gene2239 | gene2239 | rplD      | gi 57650036 ref NC_002951.2 :2305562-2306461 | MR150 | M36C05 | OK     | 251.262 | 111.94  | -1.16646  | 1.35127   | 0.17661 | 0.821477 |
| gene224  | gene224  | gutB      | gi 57650036 ref NC_002951.2 :271040-272096   | MR150 | M36C05 | OK     | 1.78898 | 3.34919 | 0.904679  | -1.20596  | 0.22784 | 0.898537 |
| gene2240 | gene2240 | rplC      | gi 57650036 ref NC_002951.2 :2306487-2307150 | MR150 | M36C05 | OK     | 232.76  | 106.069 | -1.13383  | 1.42317   | 0.15469 | 0.769852 |
| gene2241 | gene2241 | rpsJ      | gi 57650036 ref NC_002951.2 :2307177-2307486 | MR150 | M36C05 | OK     | 164.729 | 115.057 | -0.517748 | 0.750371  | 0.45303 | 0.999883 |
| gene2242 | gene2242 | SACOL2241 | gi 57650036 ref NC_002951.2 :2307842-2308232 | MR150 | M36C05 | OK     | 270.119 | 617.063 | 1.19182   | -1.48372  | 0.13788 | 0.733494 |
| gene2243 | gene2243 | SACOL2242 | gi 57650036 ref NC_002951.2 :2308423-2309758 | MR150 | M36C05 | OK     | 109.703 | 39.142  | -1.48682  | 1.85684   | 0.06333 | 0.504373 |
| gene2244 | gene2244 | topB      | gi 57650036 ref NC_002951.2 :2309870-2312006 | MR150 | M36C05 | OK     | 48.9746 | 30.3972 | -0.688097 | 0.863335  | 0.38795 | 0.999883 |
| gene2245 | gene2245 | SACOL2245 | gi 57650036 ref NC_002951.2 :2312192-2313080 | MR150 | M36C05 | OK     | 24.0363 | 26.451  | 0.138111  | -0.199634 | 0.84177 | 0.999883 |
| gene2246 | gene2246 | SACOL2246 | gi 57650036 ref NC_002951.2 :2313260-2314124 | MR150 | M36C05 | OK     | 53.7293 | 33.0561 | -0.700791 | 0.974819  | 0.32965 | 0.999883 |
| gene2247 | gene2247 | SACOL2247 | gi 57650036 ref NC_002951.2 :2314240-2314372 | MR150 | M36C05 | OK     | 420.017 | 53.0518 | -2.98497  | 1.96923   | 0.04893 | 0.434992 |
| gene2248 | gene2248 | SACOL2248 | gi 57650036 ref NC_002951.2 :2314542-2315451 | MR150 | M36C05 | OK     | 17.9255 | 16.1778 | -0.148    | 0.216778  | 0.82838 | 0.999883 |
| gene2249 | gene2249 | SACOL2250 | gi 57650036 ref NC_002951.2 :2315583-2315748 | MR150 | M36C05 | OK     | 147.519 | 94.1888 | -0.647276 | 0.809903  | 0.418   | 0.999883 |
| gene225  | gene225  | SACOL0234 | gi 57650036 ref NC_002951.2 :272097-272244   | MR150 | M36C05 | NOTEST | 0       | 0       | 0         | 0         | 1       | 1        |
| gene2250 | gene2250 | SACOL2251 | gi 57650036 ref NC_002951.2 :2315992-2316310 | MR150 | M36C05 | OK     | 56.7177 | 72.116  | 0.346521  | -0.509029 | 0.61073 | 0.999883 |

|          |          |           |                                              |       |        |    |         |         |                        |           |          |          |
|----------|----------|-----------|----------------------------------------------|-------|--------|----|---------|---------|------------------------|-----------|----------|----------|
| gene2251 | gene2251 | SACOL2252 | gi 57650036 ref NC_002951.2 :2316496-2319664 | MR150 | M36C05 | OK | 34.8897 | 33.3754 | -0.0640199             | 0.077539  | 0.93819  | 0.999883 |
| gene2252 | gene2252 | femX      | gi 57650036 ref NC_002951.2 :2319780-2321046 | MR150 | M36C05 | OK | 41.089  | 36.093  | -0.187032              | 0.250576  | 0.80214  | 0.999883 |
| gene2253 | gene2253 | SACOL2255 | gi 57650036 ref NC_002951.2 :2321677-2322442 | MR150 | M36C05 | OK | 12.1939 | 15.0352 | 0.302175               | -0.443763 | 0.65721  | 0.999883 |
| gene2254 | gene2254 | SACOL2256 | gi 57650036 ref NC_002951.2 :2322603-2324248 | MR150 | M36C05 | OK | 0.63371 | 1.37293 | 1.11538                | -0.428962 | 0.66795  | 0.999883 |
| gene2255 | gene2255 | SACOL2257 | gi 57650036 ref NC_002951.2 :2322603-2324248 | MR150 | M36C05 | OK | 1.9673  | 2.39671 | 0.284837               | -0.368716 | 0.71234  | 0.999883 |
| gene2256 | gene2256 | sarV      | gi 57650036 ref NC_002951.2 :2324349-2324700 | MR150 | M36C05 | OK | 15.867  | 7.88047 | -1.00968               | 1.30579   | 0.19163  | 0.851905 |
| gene2257 | gene2257 | SACOL2259 | gi 57650036 ref NC_002951.2 :2324825-2324996 | MR150 | M36C05 | OK | 10.8213 | 0       | -1.79769e+3(-1.79769e+ | 0.10824   | 0.653986 |          |
| gene2258 | gene2258 | SACOL2260 | gi 57650036 ref NC_002951.2 :2325052-2325196 | MR150 | M36C05 | OK | 37.5783 | 24.9484 | -0.590949              | 0.327411  | 0.74336  | 0.999883 |
| gene2259 | gene2259 | moaA      | gi 57650036 ref NC_002951.2 :2325390-2326413 | MR150 | M36C05 | OK | 58.0531 | 44.2153 | -0.392829              | 0.525504  | 0.59923  | 0.999883 |
| gene226  | gene226  | SACOL0235 | gi 57650036 ref NC_002951.2 :272267-273311   | MR150 | M36C05 | OK | 2.35872 | 3.65816 | 0.633112               | -0.86471  | 0.3872   | 0.999883 |
| gene2260 | gene2260 | mobA      | gi 57650036 ref NC_002951.2 :2326432-2327032 | MR150 | M36C05 | OK | 47.0655 | 28.1497 | -0.741554              | 1.07753   | 0.28124  | 0.965951 |
| gene2261 | gene2261 | moaD      | gi 57650036 ref NC_002951.2 :2327038-2327272 | MR150 | M36C05 | OK | 53.1015 | 32.0026 | -0.73056               | 0.986095  | 0.32409  | 0.999883 |
| gene2262 | gene2262 | moaE      | gi 57650036 ref NC_002951.2 :2327277-2327724 | MR150 | M36C05 | OK | 40.8203 | 44.6641 | 0.12983                | -0.190665 | 0.84879  | 0.999883 |
| gene2263 | gene2263 | mobB      | gi 57650036 ref NC_002951.2 :2327737-2329479 | MR150 | M36C05 | OK | 52.4043 | 32.4288 | -0.69241               | 0.490389  | 0.62386  | 0.999883 |
| gene2264 | gene2264 | SACOL2266 | gi 57650036 ref NC_002951.2 :2327737-2329479 | MR150 | M36C05 | OK | 33.8085 | 24.025  | -0.49285               | 0.558308  | 0.57663  | 0.999883 |
| gene2265 | gene2265 | moaC      | gi 57650036 ref NC_002951.2 :2329541-2330036 | MR150 | M36C05 | OK | 102.143 | 129.134 | 0.338276               | -0.462356 | 0.64383  | 0.999883 |
| gene2266 | gene2266 | moaB      | gi 57650036 ref NC_002951.2 :2330037-2330544 | MR150 | M36C05 | OK | 27.9047 | 20.5018 | -0.444757              | 0.65238   | 0.51416  | 0.999883 |
| gene2267 | gene2267 | SACOL2269 | gi 57650036 ref NC_002951.2 :2330574-2331579 | MR150 | M36C05 | OK | 28.3437 | 25.8901 | -0.130627              | 0.18617   | 0.85231  | 0.999883 |
| gene2268 | gene2268 | modC      | gi 57650036 ref NC_002951.2 :2331748-2332354 | MR150 | M36C05 | OK | 52.4027 | 56.5533 | 0.109971               | -0.15658  | 0.87558  | 0.999883 |
| gene2269 | gene2269 | modB      | gi 57650036 ref NC_002951.2 :2332354-2333026 | MR150 | M36C05 | OK | 48.3245 | 55.8794 | 0.209563               | -0.295742 | 0.76743  | 0.999883 |
| gene227  | gene227  | ispD      | gi 57650036 ref NC_002951.2 :273838-275573   | MR150 | M36C05 | OK | 39.6796 | 37.562  | -0.079122              | 0.063023  | 0.94975  | 0.999883 |
| gene2270 | gene2270 | modA      | gi 57650036 ref NC_002951.2 :2333039-2333822 | MR150 | M36C05 | OK | 107.147 | 106.155 | -0.0134241             | 0.017231  | 0.98625  | 0.999883 |
| gene2271 | gene2271 | fdhD      | gi 57650036 ref NC_002951.2 :2334111-2334909 | MR150 | M36C05 | OK | 202.778 | 256.415 | 0.33858                | -0.395999 | 0.69211  | 0.999883 |
| gene2272 | gene2272 | SACOL2274 | gi 57650036 ref NC_002951.2 :2335080-2335851 | MR150 | M36C05 | OK | 6.70327 | 2.8981  | -1.20976               | 1.64193   | 0.1006   | 0.638047 |
| gene2273 | gene2273 | SACOL2275 | gi 57650036 ref NC_002951.2 :2335922-2336477 | MR150 | M36C05 | OK | 4.31077 | 4.35428 | 0.0144878              | -0.018576 | 0.98518  | 0.999883 |
| gene2274 | gene2274 | SACOL2276 | gi 57650036 ref NC_002951.2 :2336597-2337539 | MR150 | M36C05 | OK | 5.57197 | 2.08081 | -1.42104               | 1.92164   | 0.05465  | 0.462964 |
| gene2275 | gene2275 | SACOL2277 | gi 57650036 ref NC_002951.2 :2337937-2338846 | MR150 | M36C05 | OK | 33.0434 | 14.4666 | -1.19163               | 1.71889   | 0.08563  | 0.584654 |
| gene2276 | gene2276 | SACOL2278 | gi 57650036 ref NC_002951.2 :2339059-2340214 | MR150 | M36C05 | OK | 43.2971 | 41.4464 | -0.0630249             | 0.084565  | 0.93261  | 0.999883 |
| gene2277 | gene2277 | SACOL2279 | gi 57650036 ref NC_002951.2 :2340430-2341336 | MR150 | M36C05 | OK | 3.03642 | 4.5303  | 0.577236               | -0.793658 | 0.4274   | 0.999883 |
| gene2278 | gene2278 | ureA      | gi 57650036 ref NC_002951.2 :2341595-2341898 | MR150 | M36C05 | OK | 1.38047 | 0       | -1.79769e+3(-1.79769e+ | 0.10824   | 0.653986 |          |
| gene2279 | gene2279 | ureB      | gi 57650036 ref NC_002951.2 :2341911-2344034 | MR150 | M36C05 | OK | 2.16612 | 3.65056 | 0.753003               | -0.368826 | 0.71226  | 0.999883 |
| gene228  | gene228  | SACOL0237 | gi 57650036 ref NC_002951.2 :273838-275573   | MR150 | M36C05 | OK | 47.4604 | 33.9086 | -0.485073              | 0.499326  | 0.61755  | 0.999883 |
| gene2280 | gene2280 | ureC      | gi 57650036 ref NC_002951.2 :2341911-2344034 | MR150 | M36C05 | OK | 2.72789 | 3.12622 | 0.196636               | -0.267309 | 0.78923  | 0.999883 |

|          |          |           |                                              |       |        |    |         |         |                        |           |          |           |
|----------|----------|-----------|----------------------------------------------|-------|--------|----|---------|---------|------------------------|-----------|----------|-----------|
| gene2281 | gene2281 | ureE      | gi 57650036 ref NC_002951.2 :2344046-2345181 | MR150 | M36C05 | OK | 8.45557 | 5.66983 | -0.576598              | 0.553846  | 0.57969  | 0.999883  |
| gene2282 | gene2282 | ureF      | gi 57650036 ref NC_002951.2 :2344046-2345181 | MR150 | M36C05 | OK | 5.31115 | 3.37802 | -0.652846              | 0.68295   | 0.49464  | 0.999883  |
| gene2283 | gene2283 | ureG      | gi 57650036 ref NC_002951.2 :2345193-2346644 | MR150 | M36C05 | OK | 9.58958 | 6.91557 | -0.47162               | 0.440328  | 0.6597   | 0.999883  |
| gene2284 | gene2284 | ureD      | gi 57650036 ref NC_002951.2 :2345193-2346644 | MR150 | M36C05 | OK | 10.3357 | 5.71433 | -0.854986              | 0.961472  | 0.33632  | 0.999883  |
| gene2285 | gene2285 | sarR      | gi 57650036 ref NC_002951.2 :2346832-2347180 | MR150 | M36C05 | OK | 51.5113 | 78.8037 | 0.613373               | -0.900133 | 0.36805  | 0.999883  |
| gene2286 | gene2286 | SACOL2288 | gi 57650036 ref NC_002951.2 :2347607-2347934 | MR150 | M36C05 | OK | 177.102 | 235.791 | 0.412928               | -0.577248 | 0.56377  | 0.999883  |
| gene2287 | gene2287 | sarY      | gi 57650036 ref NC_002951.2 :2347997-2348741 | MR150 | M36C05 | OK | 1.97001 | 9.32932 | 2.24357                | -2.93442  | 0.00334  | 0.0828218 |
| gene2288 | gene2288 | SACOL2290 | gi 57650036 ref NC_002951.2 :2348766-2350722 | MR150 | M36C05 | OK | 2.70405 | 11.8619 | 2.13314                | -3.0678   | 0.00216  | 0.0607226 |
| gene2289 | gene2289 | SACOL2291 | gi 57650036 ref NC_002951.2 :2351331-2352135 | MR150 | M36C05 | OK | 423.329 | 74.3328 | -2.50971               | 2.99877   | 0.00271  | 0.0715959 |
| gene229  | gene229  | SACOL0238 | gi 57650036 ref NC_002951.2 :275594-277289   | MR150 | M36C05 | OK | 42.2101 | 27.573  | -0.614331              | 0.804355  | 0.42119  | 0.999883  |
| gene2290 | gene2290 | nhaC      | gi 57650036 ref NC_002951.2 :2352567-2353968 | MR150 | M36C05 | OK | 6.37618 | 19.7338 | 1.6299                 | -2.35008  | 0.01877  | 0.249236  |
| gene2291 | gene2291 | SACOL2293 | gi 57650036 ref NC_002951.2 :2354062-2355145 | MR150 | M36C05 | OK | 4.50918 | 35.214  | 2.96521                | -4.16434  | 3.12E-05 | 0.0020732 |
| gene2292 | gene2292 | SACOL2294 | gi 57650036 ref NC_002951.2 :2355392-2355815 | MR150 | M36C05 | OK | 80.7154 | 39.5223 | -1.03018               | 1.50035   | 0.13352  | 0.7248    |
| gene2293 | gene2293 | SACOL2295 | gi 57650036 ref NC_002951.2 :2356051-2356552 | MR150 | M36C05 | OK | 1663.33 | 1354.77 | -0.296028              | 0.308671  | 0.75757  | 0.999883  |
| gene2294 | gene2294 | SACOL2296 | gi 57650036 ref NC_002951.2 :2356913-2357867 | MR150 | M36C05 | OK | 193.542 | 219.099 | 0.178939               | -0.206281 | 0.83657  | 0.999883  |
| gene2295 | gene2295 | SACOL2297 | gi 57650036 ref NC_002951.2 :2357958-2359083 | MR150 | M36C05 | OK | 22.0193 | 8.5822  | -1.35935               | 1.97209   | 0.0486   | 0.433141  |
| gene2296 | gene2296 | SACOL2298 | gi 57650036 ref NC_002951.2 :2359393-2360170 | MR150 | M36C05 | OK | 26.0038 | 12.2365 | -1.08753               | 1.58886   | 0.11209  | 0.664916  |
| gene2297 | gene2297 | SACOL2299 | gi 57650036 ref NC_002951.2 :2360191-2360443 | MR150 | M36C05 | OK | 24.5289 | 14.3884 | -0.769579              | 0.951587  | 0.34131  | 0.999883  |
| gene2298 | gene2298 | SACOL2300 | gi 57650036 ref NC_002951.2 :2360652-2364080 | MR150 | M36C05 | OK | 426.328 | 1322.73 | 1.63349                | -0.696384 | 0.48619  | 0.999883  |
| gene2299 | gene2299 | SACOL2301 | gi 57650036 ref NC_002951.2 :2360652-2364080 | MR150 | M36C05 | OK | 201.334 | 677.855 | 1.75138                | -1.66003  | 0.09691  | 0.627301  |
| gene23   | gene23   | yycI      | gi 57650036 ref NC_002951.2 :28819-29608     | MR150 | M36C05 | OK | 99.0379 | 74.7302 | -0.406289              | 0.532656  | 0.59427  | 0.999883  |
| gene230  | gene230  | SACOL0239 | gi 57650036 ref NC_002951.2 :277716-278886   | MR150 | M36C05 | OK | 35.5232 | 23.9828 | -0.56676               | 0.78812   | 0.43063  | 0.999883  |
| gene2300 | gene2300 | SACOL2302 | gi 57650036 ref NC_002951.2 :2364681-2365635 | MR150 | M36C05 | OK | 27.4167 | 33.64   | 0.295124               | -0.418788 | 0.67537  | 0.999883  |
| gene2301 | gene2301 | SACOL2303 | gi 57650036 ref NC_002951.2 :2365761-2366559 | MR150 | M36C05 | OK | 39.429  | 41.3215 | 0.0676358              | -0.095606 | 0.92383  | 0.999883  |
| gene2302 | gene2302 | SACOL2304 | gi 57650036 ref NC_002951.2 :2366943-2367636 | MR150 | M36C05 | OK | 63.6567 | 69.163  | 0.119687               | -0.164228 | 0.86955  | 0.999883  |
| gene2303 | gene2303 | SACOL2305 | gi 57650036 ref NC_002951.2 :2367991-2369020 | MR150 | M36C05 | OK | 3.78043 | 0.90974 | -2.05502               | 0.405205  | 0.68533  | 0.999883  |
| gene2304 | gene2304 | SACOL2306 | gi 57650036 ref NC_002951.2 :2367991-2369020 | MR150 | M36C05 | OK | 23.619  | 16.4061 | -0.525711              | 0.761216  | 0.44653  | 0.999883  |
| gene2305 | gene2305 | SACOL2307 | gi 57650036 ref NC_002951.2 :2369068-2369398 | MR150 | M36C05 | OK | 1.13418 | 0       | -1.79769e+3(-1.79769e+ | 0.10824   | 0.653986 |           |
| gene2306 | gene2306 | SACOL2308 | gi 57650036 ref NC_002951.2 :2369842-2370715 | MR150 | M36C05 | OK | 105.112 | 71.4547 | -0.55683               | 0.718752  | 0.47229  | 0.999883  |
| gene2307 | gene2307 | SACOL2309 | gi 57650036 ref NC_002951.2 :2371101-2372481 | MR150 | M36C05 | OK | 132.129 | 104.256 | -0.341807              | 0.399066  | 0.68984  | 0.999883  |
| gene2308 | gene2308 | SACOL2310 | gi 57650036 ref NC_002951.2 :2372760-2373299 | MR150 | M36C05 | OK | 63.1461 | 62.8951 | -0.0057462             | 0.006244  | 0.99502  | 0.999883  |
| gene2309 | gene2309 | SACOL2311 | gi 57650036 ref NC_002951.2 :2372760-2373299 | MR150 | M36C05 | OK | 404.935 | 292.917 | -0.4672                | 0.44101   | 0.65921  | 0.999883  |
| gene231  | gene231  | ispD      | gi 57650036 ref NC_002951.2 :279161-280896   | MR150 | M36C05 | OK | 41.1602 | 35.8547 | -0.199088              | 0.114808  | 0.9086   | 0.999883  |

|          |          |           |                                              |       |        |        |         |         |            |           |          |           |
|----------|----------|-----------|----------------------------------------------|-------|--------|--------|---------|---------|------------|-----------|----------|-----------|
| gene2310 | gene2310 | SACOL2312 | gi 57650036 ref NC_002951.2 :2373394-2373586 | MR150 | M36C05 | OK     | 60.0473 | 85.6045 | 0.511588   | -0.672591 | 0.50121  | 0.999883  |
| gene2311 | gene2311 | SACOL2313 | gi 57650036 ref NC_002951.2 :2373596-2374232 | MR150 | M36C05 | OK     | 17.203  | 19.7455 | 0.198869   | -0.292287 | 0.77007  | 0.999883  |
| gene2312 | gene2312 | SACOL2314 | gi 57650036 ref NC_002951.2 :2374306-2375224 | MR150 | M36C05 | OK     | 7.46424 | 9.5234  | 0.351481   | -0.513342 | 0.60771  | 0.999883  |
| gene2313 | gene2313 | SACOL2315 | gi 57650036 ref NC_002951.2 :2375491-2376022 | MR150 | M36C05 | OK     | 16.1793 | 3.00235 | -2.42998   | 3.15044   | 0.00163  | 0.0497828 |
| gene2314 | gene2314 | SACOL2316 | gi 57650036 ref NC_002951.2 :2376087-2377692 | MR150 | M36C05 | OK     | 12.2094 | 21.1031 | 0.789459   | -1.11732  | 0.26386  | 0.945311  |
| gene2315 | gene2315 | SACOL2317 | gi 57650036 ref NC_002951.2 :2378021-2378786 | MR150 | M36C05 | OK     | 19.5103 | 12.3015 | -0.665403  | 0.97631   | 0.32891  | 0.999883  |
| gene2316 | gene2316 | SACOL2318 | gi 57650036 ref NC_002951.2 :2378843-2379350 | MR150 | M36C05 | OK     | 147.995 | 206.457 | 0.480295   | -0.625749 | 0.53148  | 0.999883  |
| gene2317 | gene2317 | SACOL2319 | gi 57650036 ref NC_002951.2 :2379516-2380830 | MR150 | M36C05 | OK     | 7.97381 | 6.92712 | -0.203014  | 0.298436  | 0.76537  | 0.999883  |
| gene2318 | gene2318 | SACOL2320 | gi 57650036 ref NC_002951.2 :2381054-2381624 | MR150 | M36C05 | OK     | 10.7544 | 19.9923 | 0.894525   | -1.29638  | 0.19484  | 0.856906  |
| gene2319 | gene2319 | SACOL2321 | gi 57650036 ref NC_002951.2 :2382110-2382992 | MR150 | M36C05 | OK     | 50.2914 | 437.295 | 3.12022    | -3.73614  | 0.00019  | 0.0095236 |
| gene232  | gene232  | SACOL0241 | gi 57650036 ref NC_002951.2 :279161-280896   | MR150 | M36C05 | OK     | 89.7299 | 80.6331 | -0.154216  | 0.167268  | 0.86716  | 0.999883  |
| gene2320 | gene2320 | SACOL2322 | gi 57650036 ref NC_002951.2 :2383102-2384224 | MR150 | M36C05 | OK     | 18.2707 | 25.3521 | 0.472578   | -0.676868 | 0.49849  | 0.999883  |
| gene2321 | gene2321 | hutI      | gi 57650036 ref NC_002951.2 :2384500-2387400 | MR150 | M36C05 | OK     | 20.7834 | 32.8935 | 0.662372   | -0.664002 | 0.50669  | 0.999883  |
| gene2322 | gene2322 | hutU      | gi 57650036 ref NC_002951.2 :2384500-2387400 | MR150 | M36C05 | OK     | 10.5811 | 17.5658 | 0.731277   | -0.6283   | 0.52981  | 0.999883  |
| gene2323 | gene2323 | SACOL2325 | gi 57650036 ref NC_002951.2 :2387559-2388444 | MR150 | M36C05 | OK     | 44.7065 | 28.6602 | -0.641435  | 0.903102  | 0.36647  | 0.999883  |
| gene2324 | gene2324 | fosB      | gi 57650036 ref NC_002951.2 :2388865-2389285 | MR150 | M36C05 | OK     | 34.6585 | 13.5172 | -1.35841   | 1.94458   | 0.05183  | 0.447566  |
| gene2325 | gene2325 | hutG      | gi 57650036 ref NC_002951.2 :2389540-2390476 | MR150 | M36C05 | OK     | 27.2547 | 334.448 | 3.61721    | -4.46351  | 8.06E-06 | 0.000703  |
| gene2326 | gene2326 | SACOL2328 | gi 57650036 ref NC_002951.2 :2390765-2392025 | MR150 | M36C05 | OK     | 195.049 | 162.559 | -0.262876  | 0.29684   | 0.76659  | 0.999883  |
| gene2327 | gene2327 | rpiA      | gi 57650036 ref NC_002951.2 :2392090-2392777 | MR150 | M36C05 | OK     | 32.063  | 21.073  | -0.605518  | 0.88449   | 0.37643  | 0.999883  |
| gene2328 | gene2328 | SACOL2330 | gi 57650036 ref NC_002951.2 :2392950-2393604 | MR150 | M36C05 | OK     | 53.9477 | 51.2925 | -0.0728136 | 0.103021  | 0.91795  | 0.999883  |
| gene2329 | gene2329 | SACOL2331 | gi 57650036 ref NC_002951.2 :2393733-2394859 | MR150 | M36C05 | NOTEST | 0       | 0       | 0          | 0         | 1        | 1         |
| gene233  | gene233  | SACOL0242 | gi 57650036 ref NC_002951.2 :280917-282606   | MR150 | M36C05 | OK     | 80.2343 | 66.7678 | -0.265067  | 0.318209  | 0.75033  | 0.999883  |
| gene2330 | gene2330 | galM      | gi 57650036 ref NC_002951.2 :2393733-2394859 | MR150 | M36C05 | OK     | 8.03017 | 4.97563 | -0.690553  | 0.999285  | 0.31766  | 0.999883  |
| gene2331 | gene2331 | SACOL2333 | gi 57650036 ref NC_002951.2 :2394888-2395215 | MR150 | M36C05 | OK     | 12.7328 | 8.3614  | -0.606739  | 0.759181  | 0.44774  | 0.999883  |
| gene2332 | gene2332 | SACOL2334 | gi 57650036 ref NC_002951.2 :2395432-2397557 | MR150 | M36C05 | OK     | 21.4971 | 27.7485 | 0.368268   | -0.415928 | 0.67746  | 0.999883  |
| gene2333 | gene2333 | SACOL2335 | gi 57650036 ref NC_002951.2 :2395432-2397557 | MR150 | M36C05 | OK     | 16.8434 | 14.6529 | -0.200996  | 0.149086  | 0.88149  | 0.999883  |
| gene2334 | gene2334 | SACOL2336 | gi 57650036 ref NC_002951.2 :2397626-2397725 | MR150 | M36C05 | NOTEST | 0       | 0       | 0          | 0         | 1        | 1         |
| gene2335 | gene2335 | SACOL2338 | gi 57650036 ref NC_002951.2 :2397787-2398435 | MR150 | M36C05 | OK     | 27.6765 | 35.9677 | 0.378042   | -0.55086  | 0.58173  | 0.999883  |
| gene2336 | gene2336 | SACOL2339 | gi 57650036 ref NC_002951.2 :2398833-2399442 | MR150 | M36C05 | OK     | 5.98776 | 4.85807 | -0.301634  | 0.40714   | 0.68391  | 0.999883  |
| gene2337 | gene2337 | gltS      | gi 57650036 ref NC_002951.2 :2399778-2400987 | MR150 | M36C05 | OK     | 41.2843 | 7.53932 | -2.45309   | 3.43133   | 0.0006   | 0.0233697 |
| gene2338 | gene2338 | fni       | gi 57650036 ref NC_002951.2 :2401034-2402084 | MR150 | M36C05 | OK     | 53.3274 | 31.3935 | -0.764408  | 1.04108   | 0.29784  | 0.979757  |
| gene2339 | gene2339 | SACOL2342 | gi 57650036 ref NC_002951.2 :2402114-2403062 | MR150 | M36C05 | OK     | 22.7233 | 17.6923 | -0.361057  | 0.52497   | 0.5996   | 0.999883  |
| gene234  | gene234  | SACOL0243 | gi 57650036 ref NC_002951.2 :282641-284363   | MR150 | M36C05 | OK     | 158.399 | 95.9513 | -0.723189  | 0.817185  | 0.41382  | 0.999883  |

|          |          |           |                                              |       |        |        |         |         |           |           |          |           |
|----------|----------|-----------|----------------------------------------------|-------|--------|--------|---------|---------|-----------|-----------|----------|-----------|
| gene2340 | gene2340 | SACOL2343 | gi 57650036 ref NC_002951.2 :2403158-2404066 | MR150 | M36C05 | OK     | 74.3795 | 116.468 | 0.646953  | -0.649352 | 0.51611  | 0.999883  |
| gene2341 | gene2341 | SACOL2344 | gi 57650036 ref NC_002951.2 :2403158-2404066 | MR150 | M36C05 | OK     | 60.9989 | 128.163 | 1.07112   | -0.913907 | 0.36077  | 0.999883  |
| gene2342 | gene2342 | SACOL2345 | gi 57650036 ref NC_002951.2 :2404173-2405076 | MR150 | M36C05 | OK     | 42.4733 | 24.6309 | -0.786088 | 1.11187   | 0.2662   | 0.949459  |
| gene2343 | gene2343 | SACOL2346 | gi 57650036 ref NC_002951.2 :2405301-2405940 | MR150 | M36C05 | OK     | 36.2631 | 29.6669 | -0.289648 | 0.421872  | 0.67312  | 0.999883  |
| gene2344 | gene2344 | SACOL2347 | gi 57650036 ref NC_002951.2 :2406185-2408117 | MR150 | M36C05 | OK     | 5.12927 | 2.54526 | -1.01094  | 1.471     | 0.14129  | 0.739856  |
| gene2345 | gene2345 | SACOL2348 | gi 57650036 ref NC_002951.2 :2408129-2408777 | MR150 | M36C05 | OK     | 5.80865 | 1.47813 | -1.97443  | 2.36715   | 0.01793  | 0.242627  |
| gene2346 | gene2346 | SACOL2349 | gi 57650036 ref NC_002951.2 :2408897-2409449 | MR150 | M36C05 | OK     | 46.9524 | 48.3058 | 0.0409978 | -0.05936  | 0.95267  | 0.999883  |
| gene2347 | gene2347 | tcaB      | gi 57650036 ref NC_002951.2 :2409678-2410887 | MR150 | M36C05 | OK     | 10.9282 | 11.3636 | 0.0563652 | -0.082694 | 0.9341   | 0.999883  |
| gene2348 | gene2348 | SACOL2351 | gi 57650036 ref NC_002951.2 :2410996-2411125 | MR150 | M36C05 | NOTEST | 0       | 0       | 0         | 0         | 1        | 1         |
| gene2349 | gene2349 | tcaA      | gi 57650036 ref NC_002951.2 :2411155-2412538 | MR150 | M36C05 | OK     | 12.5579 | 6.24324 | -1.00823  | 1.47389   | 0.14051  | 0.736864  |
| gene235  | gene235  | scdA      | gi 57650036 ref NC_002951.2 :284502-285177   | MR150 | M36C05 | OK     | 39.9625 | 65.7482 | 0.718303  | -1.01132  | 0.31186  | 0.993813  |
| gene2350 | gene2350 | tcaR      | gi 57650036 ref NC_002951.2 :2412777-2413233 | MR150 | M36C05 | OK     | 50.7412 | 37.934  | -0.419667 | 0.615207  | 0.53842  | 0.999883  |
| gene2351 | gene2351 | SACOL2354 | gi 57650036 ref NC_002951.2 :2413427-2414396 | MR150 | M36C05 | OK     | 13.3415 | 28.3942 | 1.08967   | -1.57653  | 0.1149   | 0.670749  |
| gene2352 | gene2352 | SACOL2355 | gi 57650036 ref NC_002951.2 :2414970-2415327 | MR150 | M36C05 | OK     | 3.82704 | 1.38231 | -1.46915  | 1.24324   | 0.21378  | 0.89416   |
| gene2353 | gene2353 | SACOL2356 | gi 57650036 ref NC_002951.2 :2415466-2417187 | MR150 | M36C05 | OK     | 1.64249 | 6.63099 | 2.01334   | -1.63366  | 0.10233  | 0.641957  |
| gene2354 | gene2354 | SACOL2357 | gi 57650036 ref NC_002951.2 :2415466-2417187 | MR150 | M36C05 | OK     | 1.96788 | 6.69839 | 1.76718   | -2.04491  | 0.04086  | 0.394682  |
| gene2355 | gene2355 | SACOL2358 | gi 57650036 ref NC_002951.2 :2417322-2419363 | MR150 | M36C05 | OK     | 9.0238  | 10.4547 | 0.212339  | -0.111052 | 0.91158  | 0.999883  |
| gene2356 | gene2356 | SACOL2359 | gi 57650036 ref NC_002951.2 :2417322-2419363 | MR150 | M36C05 | OK     | 26.7434 | 18.9673 | -0.495667 | 0.629338  | 0.52913  | 0.999883  |
| gene2357 | gene2357 | SACOL2360 | gi 57650036 ref NC_002951.2 :2419525-2420421 | MR150 | M36C05 | OK     | 13.7722 | 19.8914 | 0.530392  | -0.580928 | 0.56129  | 0.999883  |
| gene2358 | gene2358 | SACOL2361 | gi 57650036 ref NC_002951.2 :2419525-2420421 | MR150 | M36C05 | OK     | 14.9239 | 8.62137 | -0.791635 | 0.727824  | 0.46672  | 0.999883  |
| gene2359 | gene2359 | mqa1      | gi 57650036 ref NC_002951.2 :2420486-2421965 | MR150 | M36C05 | OK     | 237.582 | 139.79  | -0.765161 | 0.845711  | 0.39771  | 0.999883  |
| gene236  | gene236  | lytS      | gi 57650036 ref NC_002951.2 :285423-287178   | MR150 | M36C05 | OK     | 11.426  | 10.49   | -0.123299 | 0.178382  | 0.85842  | 0.999883  |
| gene2360 | gene2360 | SACOL2363 | gi 57650036 ref NC_002951.2 :2422345-2423944 | MR150 | M36C05 | OK     | 16.0936 | 33.5632 | 1.06039   | -1.45169  | 0.14659  | 0.743774  |
| gene2361 | gene2361 | SACOL2364 | gi 57650036 ref NC_002951.2 :2424260-2425934 | MR150 | M36C05 | OK     | 17.561  | 15.7029 | -0.161342 | 0.227749  | 0.81984  | 0.999883  |
| gene2362 | gene2362 | SACOL2365 | gi 57650036 ref NC_002951.2 :2426086-2426716 | MR150 | M36C05 | OK     | 51.6165 | 475.898 | 3.20475   | -3.98933  | 6.63E-05 | 0.0040248 |
| gene2363 | gene2363 | SACOL2366 | gi 57650036 ref NC_002951.2 :2427029-2427545 | MR150 | M36C05 | OK     | 10.1671 | 10.1337 | -0.004756 | 0.006688  | 0.99466  | 0.999883  |
| gene2364 | gene2364 | SACOL2367 | gi 57650036 ref NC_002951.2 :2427735-2428740 | MR150 | M36C05 | OK     | 28.7242 | 25.4792 | -0.172947 | 0.246485  | 0.80531  | 0.999883  |
| gene2365 | gene2365 | SACOL2368 | gi 57650036 ref NC_002951.2 :2428785-2429187 | MR150 | M36C05 | OK     | 9.79292 | 14.6908 | 0.585098  | -0.79783  | 0.42497  | 0.999883  |
| gene2366 | gene2366 | SACOL2369 | gi 57650036 ref NC_002951.2 :2429222-2430257 | MR150 | M36C05 | OK     | 9.53654 | 17.0355 | 0.837007  | -1.22519  | 0.2205   | 0.89416   |
| gene2367 | gene2367 | SACOL2371 | gi 57650036 ref NC_002951.2 :2430488-2430920 | MR150 | M36C05 | OK     | 40.7923 | 29.4605 | -0.469515 | 0.689399  | 0.49057  | 0.999883  |
| gene2368 | gene2368 | SACOL2372 | gi 57650036 ref NC_002951.2 :2430971-2431064 | MR150 | M36C05 | NOTEST | 0       | 0       | 0         | 0         | 1        | 1         |
| gene2369 | gene2369 | SACOL2373 | gi 57650036 ref NC_002951.2 :2431126-2432404 | MR150 | M36C05 | OK     | 4.12    | 2.35212 | -0.808682 | 1.13687   | 0.25559  | 0.933265  |
| gene237  | gene237  | lytR      | gi 57650036 ref NC_002951.2 :287180-287921   | MR150 | M36C05 | OK     | 16.6964 | 6.11813 | -1.44837  | 2.08468   | 0.0371   | 0.369812  |

|          |          |           |                                              |       |        |        |         |         |            |           |         |           |
|----------|----------|-----------|----------------------------------------------|-------|--------|--------|---------|---------|------------|-----------|---------|-----------|
| gene2370 | gene2370 | SACOL2374 | gi 57650036 ref NC_002951.2 :2432564-2433188 | MR150 | M36C05 | OK     | 27.4366 | 8.85111 | -1.63217   | 2.35806   | 0.01837 | 0.245748  |
| gene2371 | gene2371 | SACOL2375 | gi 57650036 ref NC_002951.2 :2433233-2434178 | MR150 | M36C05 | OK     | 64.3336 | 27.5336 | -1.22438   | 1.67975   | 0.09301 | 0.611738  |
| gene2372 | gene2372 | SACOL2376 | gi 57650036 ref NC_002951.2 :2434263-2435706 | MR150 | M36C05 | OK     | 4.06613 | 5.67562 | 0.481123   | -0.701966 | 0.4827  | 0.999883  |
| gene2373 | gene2373 | SACOL2377 | gi 57650036 ref NC_002951.2 :2435888-2436272 | MR150 | M36C05 | OK     | 79.938  | 138.098 | 0.788744   | -1.12802  | 0.25931 | 0.938894  |
| gene2374 | gene2374 | SACOL2378 | gi 57650036 ref NC_002951.2 :2437759-2439865 | MR150 | M36C05 | OK     | 20.091  | 12.0844 | -0.733408  | 1.01432   | 0.31043 | 0.99362   |
| gene2375 | gene2375 | SACOL2379 | gi 57650036 ref NC_002951.2 :2439935-2440358 | MR150 | M36C05 | OK     | 158.011 | 1079.45 | 2.77221    | -3.35725  | 0.00079 | 0.0287737 |
| gene2376 | gene2376 | SACOL2380 | gi 57650036 ref NC_002951.2 :2440453-2440576 | MR150 | M36C05 | NOTEST | 0       | 0       | 0          | 0         | 1       | 1         |
| gene2377 | gene2377 | SACOL2381 | gi 57650036 ref NC_002951.2 :2440622-2440979 | MR150 | M36C05 | OK     | 35.4001 | 44.2339 | 0.3214     | -0.470102 | 0.63828 | 0.999883  |
| gene2378 | gene2378 | SACOL2382 | gi 57650036 ref NC_002951.2 :2441382-2442660 | MR150 | M36C05 | OK     | 131.556 | 128.14  | -0.0379605 | 0.044264  | 0.96469 | 0.999883  |
| gene2379 | gene2379 | SACOL2383 | gi 57650036 ref NC_002951.2 :2442841-2443207 | MR150 | M36C05 | OK     | 42.6942 | 12.4675 | -1.77587   | 2.48732   | 0.01287 | 0.194869  |
| gene238  | gene238  | lrgA      | gi 57650036 ref NC_002951.2 :288033-289171   | MR150 | M36C05 | OK     | 0.62601 | 2.26039 | 1.85232    | -0.87605  | 0.381   | 0.999883  |
| gene2380 | gene2380 | sarZ      | gi 57650036 ref NC_002951.2 :2443604-2444051 | MR150 | M36C05 | OK     | 14.2253 | 6.25298 | -1.18584   | 1.59518   | 0.11067 | 0.660838  |
| gene2381 | gene2381 | SACOL2385 | gi 57650036 ref NC_002951.2 :2444266-2444695 | MR150 | M36C05 | OK     | 145.28  | 101.073 | -0.523432  | 0.729267  | 0.46584 | 0.999883  |
| gene2382 | gene2382 | SACOL2386 | gi 57650036 ref NC_002951.2 :2444801-2445971 | MR150 | M36C05 | OK     | 2.05245 | 13.5259 | 2.7203     | -3.78884  | 0.00015 | 0.0081136 |
| gene2383 | gene2383 | SACOL2387 | gi 57650036 ref NC_002951.2 :2446340-2447974 | MR150 | M36C05 | NOTEST | 0.42832 | 0.92549 | 1.11154    | -0.693679 | 0.48788 | 1         |
| gene2384 | gene2384 | SACOL2388 | gi 57650036 ref NC_002951.2 :2446340-2447974 | MR150 | M36C05 | OK     | 1.98092 | 3.263   | 0.720027   | -0.810384 | 0.41772 | 0.999883  |
| gene2385 | gene2385 | SACOL2389 | gi 57650036 ref NC_002951.2 :2448231-2448885 | MR150 | M36C05 | OK     | 37.7634 | 22.6076 | -0.740181  | 1.07891   | 0.28063 | 0.965951  |
| gene2386 | gene2386 | SACOL2390 | gi 57650036 ref NC_002951.2 :2448907-2449942 | MR150 | M36C05 | OK     | 36.8624 | 37.7686 | 0.0350391  | -0.048324 | 0.96146 | 0.999883  |
| gene2387 | gene2387 | SACOL2391 | gi 57650036 ref NC_002951.2 :2449965-2450418 | MR150 | M36C05 | OK     | 32.6143 | 39.2526 | 0.267283   | -0.392923 | 0.69438 | 0.999883  |
| gene2388 | gene2388 | narI      | gi 57650036 ref NC_002951.2 :2450437-2456914 | MR150 | M36C05 | OK     | 19.5357 | 30.2433 | 0.630503   | -0.553002 | 0.58026 | 0.999883  |
| gene2389 | gene2389 | narJ      | gi 57650036 ref NC_002951.2 :2450437-2456914 | MR150 | M36C05 | OK     | 0.78289 | 5.36448 | 2.77656    | -0.685906 | 0.49277 | 0.999883  |
| gene239  | gene239  | lrgB      | gi 57650036 ref NC_002951.2 :288033-289171   | MR150 | M36C05 | OK     | 2.1347  | 6.81407 | 1.67448    | -2.04907  | 0.04046 | 0.392458  |
| gene2390 | gene2390 | narH      | gi 57650036 ref NC_002951.2 :2450437-2456914 | MR150 | M36C05 | OK     | 1.23881 | 8.3479  | 2.75246    | -1.58885  | 0.1121  | 0.664916  |
| gene2391 | gene2391 | narG      | gi 57650036 ref NC_002951.2 :2450437-2456914 | MR150 | M36C05 | OK     | 0.35115 | 6.12474 | 4.12451    | -2.35663  | 0.01844 | 0.246238  |
| gene2392 | gene2392 | SACOL2396 | gi 57650036 ref NC_002951.2 :2457223-2458506 | MR150 | M36C05 | OK     | 5.11744 | 12.0482 | 1.23533    | -1.75445  | 0.07935 | 0.560274  |
| gene2393 | gene2393 | nirD      | gi 57650036 ref NC_002951.2 :2457223-2458506 | MR150 | M36C05 | OK     | 1.26014 | 3.63897 | 1.52994    | -0.436007 | 0.66283 | 0.999883  |
| gene2394 | gene2394 | nirB      | gi 57650036 ref NC_002951.2 :2458509-2460915 | MR150 | M36C05 | OK     | 1.3193  | 3.89639 | 1.56236    | -2.23496  | 0.02542 | 0.303073  |
| gene2395 | gene2395 | nirR      | gi 57650036 ref NC_002951.2 :2460980-2461712 | MR150 | M36C05 | OK     | 0.86332 | 5.18484 | 2.58633    | -2.92179  | 0.00348 | 0.0850894 |
| gene2396 | gene2396 | SACOL2400 | gi 57650036 ref NC_002951.2 :2461941-2462478 | MR150 | M36C05 | OK     | 15.8919 | 20.642  | 0.37729    | -0.551127 | 0.58155 | 0.999883  |
| gene2397 | gene2397 | SACOL2401 | gi 57650036 ref NC_002951.2 :2462710-2463535 | MR150 | M36C05 | OK     | 15.4336 | 13.4133 | -0.202414  | 0.297604  | 0.76601 | 0.999883  |
| gene2398 | gene2398 | SACOL2402 | gi 57650036 ref NC_002951.2 :2464017-2464485 | MR150 | M36C05 | OK     | 21.1059 | 30.8912 | 0.549547   | -0.804612 | 0.42104 | 0.999883  |
| gene2399 | gene2399 | SACOL2403 | gi 57650036 ref NC_002951.2 :2464670-2466221 | MR150 | M36C05 | OK     | 5.78181 | 8.64831 | 0.580898   | -0.852655 | 0.39385 | 0.999883  |
| gene24   | gene24   | yycJ      | gi 57650036 ref NC_002951.2 :29997-30798     | MR150 | M36C05 | OK     | 59.1032 | 48.0898 | -0.297505  | 0.409009  | 0.68253 | 0.999883  |

|          |          |           |                                              |       |        |        |         |         |              |            |         |           |
|----------|----------|-----------|----------------------------------------------|-------|--------|--------|---------|---------|--------------|------------|---------|-----------|
| gene240  | gene240  | SACOL0249 | gi 57650036 ref NC_002951.2 :289278-289983   | MR150 | M36C05 | OK     | 58.5075 | 114.494 | 0.968584     | -1.29589   | 0.19502 | 0.856906  |
| gene2400 | gene2400 | SACOL2404 | gi 57650036 ref NC_002951.2 :2466515-2467033 | MR150 | M36C05 | OK     | 17.086  | 34.0752 | 0.995909     | -0.724217  | 0.46893 | 0.999883  |
| gene2401 | gene2401 | SACOL2405 | gi 57650036 ref NC_002951.2 :2466515-2467033 | MR150 | M36C05 | OK     | 69.1268 | 105.515 | 0.610126     | -0.773684  | 0.43912 | 0.999883  |
| gene2402 | gene2402 | SACOL2406 | gi 57650036 ref NC_002951.2 :2467197-2467296 | MR150 | M36C05 | NOTEST | 0       | 0       | 0            | 0          | 1       | 1         |
| gene2403 | gene2403 | SACOL2407 | gi 57650036 ref NC_002951.2 :2467305-2467905 | MR150 | M36C05 | OK     | 60.4582 | 38.9128 | -0.635694    | 0.91065    | 0.36248 | 0.999883  |
| gene2404 | gene2404 | SACOL2408 | gi 57650036 ref NC_002951.2 :2467923-2468295 | MR150 | M36C05 | OK     | 52.7143 | 36.8086 | -0.518152    | 0.760215   | 0.44713 | 0.999883  |
| gene2405 | gene2405 | fmhA      | gi 57650036 ref NC_002951.2 :2468540-2469791 | MR150 | M36C05 | OK     | 10.7831 | 7.1329  | -0.596211    | 0.875171   | 0.38148 | 0.999883  |
| gene2406 | gene2406 | SACOL2410 | gi 57650036 ref NC_002951.2 :2469887-2472095 | MR150 | M36C05 | OK     | 354.249 | 268.989 | -0.397214    | 0.293781   | 0.76893 | 0.999883  |
| gene2407 | gene2407 | SACOL2411 | gi 57650036 ref NC_002951.2 :2469887-2472095 | MR150 | M36C05 | OK     | 217.342 | 198.769 | -0.12888     | 0.077819   | 0.93797 | 0.999883  |
| gene2408 | gene2408 | SACOL2412 | gi 57650036 ref NC_002951.2 :2469887-2472095 | MR150 | M36C05 | OK     | 138.586 | 94.7218 | -0.549012    | 0.258138   | 0.7963  | 0.999883  |
| gene2409 | gene2409 | SACOL2413 | gi 57650036 ref NC_002951.2 :2472215-2473613 | MR150 | M36C05 | OK     | 20.8384 | 22.1756 | 0.0897324    | -0.1261    | 0.89965 | 0.999883  |
| gene241  | gene241  | SACOL0250 | gi 57650036 ref NC_002951.2 :290131-290923   | MR150 | M36C05 | OK     | 0.25863 | 1.49075 | 2.5271       | -1.9157    | 0.0554  | 0.466228  |
| gene2410 | gene2410 | SACOL2414 | gi 57650036 ref NC_002951.2 :2473829-2473934 | MR150 | M36C05 | OK     | 0       | 3033.39 | 1.79769e+30  | 1.79769e+  | 0.06916 | 0.522414  |
| gene2411 | gene2411 | gpmA      | gi 57650036 ref NC_002951.2 :2474087-2474774 | MR150 | M36C05 | OK     | 118.507 | 246.304 | 1.05546      | -1.30574   | 0.19164 | 0.851905  |
| gene2412 | gene2412 | SACOL2416 | gi 57650036 ref NC_002951.2 :2475099-2475966 | MR150 | M36C05 | OK     | 16.2988 | 15.5441 | -0.0683999   | 0.100448   | 0.91999 | 0.999883  |
| gene2413 | gene2413 | SACOL2418 | gi 57650036 ref NC_002951.2 :2476717-2478028 | MR150 | M36C05 | OK     | 17.0935 | 4.56441 | -1.90495     | 2.75229    | 0.00592 | 0.119299  |
| gene2414 | gene2414 | hlgA      | gi 57650036 ref NC_002951.2 :2478563-2479493 | MR150 | M36C05 | OK     | 21.1858 | 17.8269 | -0.249041    | 0.362951   | 0.71664 | 0.999883  |
| gene2415 | gene2415 | SACOL2420 | gi 57650036 ref NC_002951.2 :2479556-2479682 | MR150 | M36C05 | NOTEST | 0       | 0       | 0            | 0          | 1       | 1         |
| gene2416 | gene2416 | hlgC      | gi 57650036 ref NC_002951.2 :2480060-2481008 | MR150 | M36C05 | OK     | 10.031  | 8.10895 | -0.306882    | 0.449643   | 0.65297 | 0.999883  |
| gene2417 | gene2417 | hlgB      | gi 57650036 ref NC_002951.2 :2481009-2481987 | MR150 | M36C05 | OK     | 9.44759 | 10.7725 | 0.189341     | -0.278228  | 0.78084 | 0.999883  |
| gene2418 | gene2418 | SACOL2423 | gi 57650036 ref NC_002951.2 :2482038-2482506 | MR150 | M36C05 | OK     | 4.56344 | 3.70694 | -0.299894    | 0.361551   | 0.71769 | 0.999883  |
| gene2419 | gene2419 | bioW      | gi 57650036 ref NC_002951.2 :2482516-2483209 | MR150 | M36C05 | OK     | 1.86312 | 3.1336  | 0.750096     | -0.913381  | 0.36104 | 0.999883  |
| gene242  | gene242  | bglA      | gi 57650036 ref NC_002951.2 :290938-292375   | MR150 | M36C05 | OK     | 4.45729 | 7.57453 | 0.76499      | -1.11946   | 0.26294 | 0.945085  |
| gene2420 | gene2420 | SACOL2425 | gi 57650036 ref NC_002951.2 :2483219-2485320 | MR150 | M36C05 | OK     | 1.33748 | 2.40739 | 0.847958     | -0.864383  | 0.38738 | 0.999883  |
| gene2421 | gene2421 | bioB      | gi 57650036 ref NC_002951.2 :2483219-2485320 | MR150 | M36C05 | OK     | 1.13712 | 2.59304 | 1.18926      | -1.11318   | 0.26563 | 0.948965  |
| gene2422 | gene2422 | bioA      | gi 57650036 ref NC_002951.2 :2485321-2487344 | MR150 | M36C05 | OK     | 0.66072 | 1.61693 | 1.29116      | -1.40875   | 0.15891 | 0.778782  |
| gene2423 | gene2423 | bioD      | gi 57650036 ref NC_002951.2 :2485321-2487344 | MR150 | M36C05 | OK     | 0.31434 | 1.58614 | 2.3351       | -1.23212   | 0.2179  | 0.89416   |
| gene2424 | gene2424 | SACOL2429 | gi 57650036 ref NC_002951.2 :2487564-2487708 | MR150 | M36C05 | NOTEST | 0       | 0       | 0            | 0          | 1       | 1         |
| gene2425 | gene2425 | SACOL2430 | gi 57650036 ref NC_002951.2 :2487795-2489529 | MR150 | M36C05 | OK     | 0.29954 | 1.79623 | 2.58414      | -2.91931   | 0.00351 | 0.0851932 |
| gene2426 | gene2426 | SACOL2431 | gi 57650036 ref NC_002951.2 :2489553-2491317 | MR150 | M36C05 | OK     | 0.5876  | 1.26847 | 1.11018      | -1.37451   | 0.16929 | 0.809726  |
| gene2427 | gene2427 | SACOL2433 | gi 57650036 ref NC_002951.2 :2491944-2492052 | MR150 | M36C05 | OK     | 17905.4 | 0       | -1.79769e+30 | -1.79769e+ | 0.00327 | 0.0821387 |
| gene2428 | gene2428 | SACOL2434 | gi 57650036 ref NC_002951.2 :2492186-2492573 | MR150 | M36C05 | OK     | 6.49166 | 13.4806 | 1.05422      | -1.36732   | 0.17153 | 0.816663  |
| gene2429 | gene2429 | SACOL2435 | gi 57650036 ref NC_002951.2 :2492840-2493983 | MR150 | M36C05 | OK     | 33.6167 | 51.7955 | 0.62365      | -0.839213  | 0.40135 | 0.999883  |

|          |          |           |                                              |       |        |        |         |         |            |           |         |           |
|----------|----------|-----------|----------------------------------------------|-------|--------|--------|---------|---------|------------|-----------|---------|-----------|
| gene243  | gene243  | SACOL0252 | gi 57650036 ref NC_002951.2 :292808-293570   | MR150 | M36C05 | OK     | 1.90695 | 4.90764 | 1.36376    | -1.74977  | 0.08016 | 0.563209  |
| gene2430 | gene2430 | SACOL2436 | gi 57650036 ref NC_002951.2 :2494042-2494702 | MR150 | M36C05 | OK     | 59.2346 | 108.922 | 0.878779   | -1.18957  | 0.23422 | 0.903045  |
| gene2431 | gene2431 | bcr       | gi 57650036 ref NC_002951.2 :2494883-2496095 | MR150 | M36C05 | OK     | 64.921  | 48.37   | -0.424573  | 0.550017  | 0.58231 | 0.999883  |
| gene2432 | gene2432 | SACOL2438 | gi 57650036 ref NC_002951.2 :2496217-2496691 | MR150 | M36C05 | OK     | 6.69625 | 13.2958 | 0.989549   | -1.35233  | 0.17627 | 0.821477  |
| gene2433 | gene2433 | SACOL2439 | gi 57650036 ref NC_002951.2 :2496803-2497460 | MR150 | M36C05 | OK     | 50.2442 | 92.0091 | 0.872818   | -1.20115  | 0.22969 | 0.898537  |
| gene2434 | gene2434 | SACOL2440 | gi 57650036 ref NC_002951.2 :2497522-2498329 | MR150 | M36C05 | OK     | 5.04477 | 7.9962  | 0.664527   | -0.945956 | 0.34417 | 0.999883  |
| gene2435 | gene2435 | SACOL2441 | gi 57650036 ref NC_002951.2 :2498614-2500024 | MR150 | M36C05 | OK     | 101.387 | 101.396 | 0.00013592 | -0.000161 | 0.99987 | 0.999883  |
| gene2436 | gene2436 | SACOL2442 | gi 57650036 ref NC_002951.2 :2500161-2502240 | MR150 | M36C05 | OK     | 34.2378 | 22.7566 | -0.589302  | 0.769313  | 0.44171 | 0.999883  |
| gene2437 | gene2437 | SACOL2443 | gi 57650036 ref NC_002951.2 :2502379-2504209 | MR150 | M36C05 | OK     | 40.1245 | 13.3879 | -1.58356   | 2.12924   | 0.03323 | 0.349475  |
| gene2438 | gene2438 | SACOL2445 | gi 57650036 ref NC_002951.2 :2504440-2505937 | MR150 | M36C05 | OK     | 29.758  | 21.7567 | -0.451822  | 0.619077  | 0.53587 | 0.999883  |
| gene2439 | gene2439 | SACOL2446 | gi 57650036 ref NC_002951.2 :2506028-2506880 | MR150 | M36C05 | OK     | 21.1356 | 31.8044 | 0.589556   | -0.851778 | 0.39434 | 0.999883  |
| gene244  | gene244  | rbsK      | gi 57650036 ref NC_002951.2 :293820-294735   | MR150 | M36C05 | OK     | 9.63712 | 12.6484 | 0.392277   | -0.576096 | 0.56455 | 0.999883  |
| gene2440 | gene2440 | SACOL2448 | gi 57650036 ref NC_002951.2 :2507201-2508137 | MR150 | M36C05 | OK     | 13.1072 | 6.89274 | -0.927211  | 1.35415   | 0.17569 | 0.821477  |
| gene2441 | gene2441 | SACOL2449 | gi 57650036 ref NC_002951.2 :2508362-2509763 | MR150 | M36C05 | OK     | 36.5993 | 52.3175 | 0.515479   | -0.672976 | 0.50096 | 0.999883  |
| gene2442 | gene2442 | SACOL2450 | gi 57650036 ref NC_002951.2 :2510056-2511693 | MR150 | M36C05 | OK     | 39.1978 | 60.0675 | 0.615813   | -0.512776 | 0.60811 | 0.999883  |
| gene2443 | gene2443 | SACOL2451 | gi 57650036 ref NC_002951.2 :2510056-2511693 | MR150 | M36C05 | OK     | 30.749  | 64.505  | 1.06887    | -1.04937  | 0.29401 | 0.977365  |
| gene2444 | gene2444 | SACOL2452 | gi 57650036 ref NC_002951.2 :2511709-2513568 | MR150 | M36C05 | OK     | 26.6822 | 46.8324 | 0.811631   | -0.524233 | 0.60012 | 0.999883  |
| gene2445 | gene2445 | SACOL2453 | gi 57650036 ref NC_002951.2 :2511709-2513568 | MR150 | M36C05 | OK     | 26.3945 | 68.7033 | 1.38014    | -1.52277  | 0.12782 | 0.708268  |
| gene2446 | gene2446 | SACOL2454 | gi 57650036 ref NC_002951.2 :2513894-2514014 | MR150 | M36C05 | NOTEST | 0       | 0       | 0          | 0         | 1       | 1         |
| gene2447 | gene2447 | SACOL2456 | gi 57650036 ref NC_002951.2 :2514237-2515000 | MR150 | M36C05 | OK     | 35.9688 | 27.0458 | -0.411343  | 0.60144   | 0.54755 | 0.999883  |
| gene2448 | gene2448 | SACOL2457 | gi 57650036 ref NC_002951.2 :2514237-2515000 | MR150 | M36C05 | NOTEST | 0       | 0       | 0          | 0         | 1       | 1         |
| gene2449 | gene2449 | SACOL2458 | gi 57650036 ref NC_002951.2 :2515016-2516654 | MR150 | M36C05 | OK     | 35.2554 | 30.2763 | -0.219656  | 0.290297  | 0.77159 | 0.999883  |
| gene245  | gene245  | SACOL0254 | gi 57650036 ref NC_002951.2 :294762-295167   | MR150 | M36C05 | OK     | 8.16859 | 3.75458 | -1.12143   | 1.34353   | 0.1791  | 0.823475  |
| gene2450 | gene2450 | pnbA      | gi 57650036 ref NC_002951.2 :2517261-2518614 | MR150 | M36C05 | OK     | 13.5487 | 97.1388 | 2.84189    | -3.71182  | 0.00021 | 0.0101304 |
| gene2451 | gene2451 | SACOL2460 | gi 57650036 ref NC_002951.2 :2518675-2519863 | MR150 | M36C05 | OK     | 9.30033 | 10.1547 | 0.126792   | -0.186393 | 0.85214 | 0.999883  |
| gene2452 | gene2452 | SACOL2461 | gi 57650036 ref NC_002951.2 :2520258-2521690 | MR150 | M36C05 | OK     | 8.49102 | 50.2842 | 2.5661     | -3.01333  | 0.00258 | 0.0700378 |
| gene2453 | gene2453 | SACOL2462 | gi 57650036 ref NC_002951.2 :2520258-2521690 | MR150 | M36C05 | OK     | 4.95937 | 24.0742 | 2.27926    | -1.73355  | 0.083   | 0.574038  |
| gene2454 | gene2454 | pepA2     | gi 57650036 ref NC_002951.2 :2521937-2523014 | MR150 | M36C05 | OK     | 69.4971 | 91.7811 | 0.401245   | -0.507747 | 0.61163 | 0.999883  |
| gene2455 | gene2455 | SACOL2464 | gi 57650036 ref NC_002951.2 :2523368-2523892 | MR150 | M36C05 | OK     | 60.7501 | 55.8833 | -0.12047   | 0.116936  | 0.90691 | 0.999883  |
| gene2456 | gene2456 | SACOL2465 | gi 57650036 ref NC_002951.2 :2523368-2523892 | MR150 | M36C05 | OK     | 98.0247 | 67.3241 | -0.542021  | 0.593533  | 0.55282 | 0.999883  |
| gene2457 | gene2457 | SACOL2466 | gi 57650036 ref NC_002951.2 :2523997-2524192 | MR150 | M36C05 | NOTEST | 0       | 0       | 0          | 0         | 1       | 1         |
| gene2458 | gene2458 | SACOL2467 | gi 57650036 ref NC_002951.2 :2524250-2524706 | MR150 | M36C05 | OK     | 18.5056 | 61.6428 | 1.73597    | -2.51544  | 0.01189 | 0.186337  |
| gene2459 | gene2459 | SACOL2469 | gi 57650036 ref NC_002951.2 :2524873-2526451 | MR150 | M36C05 | OK     | 19.7844 | 19.8371 | 0.0038394  | -0.005366 | 0.99572 | 0.999883  |



|          |          |           |                                              |       |        |        |         |         |            |           |          |           |
|----------|----------|-----------|----------------------------------------------|-------|--------|--------|---------|---------|------------|-----------|----------|-----------|
| gene246  | gene246  | SACOL0255 | gi 57650036 ref NC_002951.2 :295181-296063   | MR150 | M36C05 | OK     | 7.40899 | 6.95402 | -0.0914299 | 0.132427  | 0.89465  | 0.999883  |
| gene2460 | gene2460 | SACOL2470 | gi 57650036 ref NC_002951.2 :2526645-2527395 | MR150 | M36C05 | OK     | 15.5882 | 11.0327 | -0.498667  | 0.731045  | 0.46475  | 0.999883  |
| gene2461 | gene2461 | SACOL2471 | gi 57650036 ref NC_002951.2 :2527618-2528812 | MR150 | M36C05 | OK     | 4.1599  | 5.98946 | 0.525877   | -0.761083 | 0.44661  | 0.999883  |
| gene2462 | gene2462 | SACOL2472 | gi 57650036 ref NC_002951.2 :2528823-2532179 | MR150 | M36C05 | NOTEST | 0.83509 | 0.60179 | -0.472672  | 0.212433  | 0.83177  | 1         |
| gene2463 | gene2463 | SACOL2473 | gi 57650036 ref NC_002951.2 :2528823-2532179 | MR150 | M36C05 | OK     | 0.74567 | 1.61166 | 1.11194    | -0.654714 | 0.51265  | 0.999883  |
| gene2464 | gene2464 | SACOL2474 | gi 57650036 ref NC_002951.2 :2528823-2532179 | MR150 | M36C05 | OK     | 0.91414 | 1.31697 | 0.526746   | -0.331411 | 0.74033  | 0.999883  |
| gene2465 | gene2465 | SACOL2475 | gi 57650036 ref NC_002951.2 :2528823-2532179 | MR150 | M36C05 | OK     | 2.49661 | 2.54732 | 0.0290076  | -0.029066 | 0.97681  | 0.999883  |
| gene2466 | gene2466 | SACOL2476 | gi 57650036 ref NC_002951.2 :2532191-2533790 | MR150 | M36C05 | OK     | 4.05076 | 8.74534 | 1.11032    | -1.6224   | 0.10472  | 0.649955  |
| gene2467 | gene2467 | SACOL2477 | gi 57650036 ref NC_002951.2 :2533932-2535147 | MR150 | M36C05 | OK     | 0.45265 | 1.08619 | 1.26281    | -1.3566   | 0.17491  | 0.821477  |
| gene2468 | gene2468 | SACOL2478 | gi 57650036 ref NC_002951.2 :2535226-2536045 | MR150 | M36C05 | OK     | 1.23676 | 0.71282 | -0.794962  | 0.820741  | 0.41179  | 0.999883  |
| gene2469 | gene2469 | SACOL2479 | gi 57650036 ref NC_002951.2 :2536055-2536877 | MR150 | M36C05 | NOTEST | 0.24616 | 0.53203 | 1.11191    | -0.786674 | 0.43147  | 1         |
| gene247  | gene247  | SACOL0257 | gi 57650036 ref NC_002951.2 :296294-297293   | MR150 | M36C05 | OK     | 5.36632 | 29.2591 | 2.44688    | -3.49292  | 0.00048  | 0.0195727 |
| gene2470 | gene2470 | SACOL2480 | gi 57650036 ref NC_002951.2 :2537024-2537156 | MR150 | M36C05 | NOTEST | 0       | 0       | 0          | 0         | 1        | 1         |
| gene2471 | gene2471 | SACOL2481 | gi 57650036 ref NC_002951.2 :2537619-2537985 | MR150 | M36C05 | OK     | 7.26709 | 71.524  | 3.29898    | -4.39938  | 1.09E-05 | 0.0008765 |
| gene2472 | gene2472 | fabG2     | gi 57650036 ref NC_002951.2 :2538247-2539066 | MR150 | M36C05 | OK     | 8.6573  | 124.921 | 3.85095    | -5.16703  | 2.38E-07 | 3.66E-05  |
| gene2473 | gene2473 | SACOL2483 | gi 57650036 ref NC_002951.2 :2539298-2540837 | MR150 | M36C05 | OK     | 39.0051 | 116.976 | 1.58448    | -1.93678  | 0.05277  | 0.454118  |
| gene2474 | gene2474 | SACOL2484 | gi 57650036 ref NC_002951.2 :2540948-2541371 | MR150 | M36C05 | OK     | 22.5729 | 204.034 | 3.17614    | -4.39597  | 1.10E-05 | 0.0008765 |
| gene2475 | gene2475 | SACOL2485 | gi 57650036 ref NC_002951.2 :2541822-2542242 | MR150 | M36C05 | OK     | 94.2711 | 178.227 | 0.918826   | -1.27371  | 0.20277  | 0.872472  |
| gene2476 | gene2476 | SACOL2486 | gi 57650036 ref NC_002951.2 :2542259-2542679 | MR150 | M36C05 | OK     | 28.42   | 79.1006 | 1.47678    | -2.14743  | 0.03176  | 0.342022  |
| gene2477 | gene2477 | SACOL2487 | gi 57650036 ref NC_002951.2 :2542945-2543368 | MR150 | M36C05 | OK     | 1.36806 | 5.92835 | 2.1155     | -2.1138   | 0.03453  | 0.355995  |
| gene2478 | gene2478 | SACOL2488 | gi 57650036 ref NC_002951.2 :2543618-2544314 | MR150 | M36C05 | OK     | 59.5683 | 205.787 | 1.78853    | -2.30624  | 0.0211   | 0.272156  |
| gene2479 | gene2479 | SACOL2489 | gi 57650036 ref NC_002951.2 :2544761-2544884 | MR150 | M36C05 | NOTEST | 0       | 0       | 0          | 0         | 1        | 1         |
| gene248  | gene248  | SACOL0258 | gi 57650036 ref NC_002951.2 :297443-297623   | MR150 | M36C05 | NOTEST | 0       | 0       | 0          | 0         | 1        | 1         |
| gene2480 | gene2480 | SACOL2491 | gi 57650036 ref NC_002951.2 :2545143-2545335 | MR150 | M36C05 | OK     | 48.0378 | 166.929 | 1.79699    | -2.37763  | 0.01742  | 0.238061  |
| gene2481 | gene2481 | SACOL2492 | gi 57650036 ref NC_002951.2 :2545769-2545892 | MR150 | M36C05 | NOTEST | 0       | 0       | 0          | 0         | 1        | 1         |
| gene2482 | gene2482 | SACOL2493 | gi 57650036 ref NC_002951.2 :2545895-2546690 | MR150 | M36C05 | OK     | 4.6318  | 6.11828 | 0.401552   | -0.563443 | 0.57313  | 0.999883  |
| gene2483 | gene2483 | SACOL2494 | gi 57650036 ref NC_002951.2 :2547225-2547513 | MR150 | M36C05 | NOTEST | 0       | 0       | 0          | 0         | 1        | 1         |
| gene2484 | gene2484 | SACOL2495 | gi 57650036 ref NC_002951.2 :2547515-2547842 | MR150 | M36C05 | NOTEST | 0       | 0       | 0          | 0         | 1        | 1         |
| gene2485 | gene2485 | SACOL2496 | gi 57650036 ref NC_002951.2 :2548053-2549948 | MR150 | M36C05 | NOTEST | 0       | 0       | 0          | 0         | 1        | 1         |
| gene2486 | gene2486 | SACOL2497 | gi 57650036 ref NC_002951.2 :2548053-2549948 | MR150 | M36C05 | NOTEST | 0       | 0       | 0          | 0         | 1        | 1         |
| gene2487 | gene2487 | SACOL2498 | gi 57650036 ref NC_002951.2 :2550059-2550836 | MR150 | M36C05 | OK     | 5.57224 | 4.20628 | -0.40571   | 0.562334  | 0.57389  | 0.999883  |
| gene2488 | gene2488 | SACOL2499 | gi 57650036 ref NC_002951.2 :2551138-2554000 | MR150 | M36C05 | OK     | 10.4155 | 9.97593 | -0.0622051 | 0.086985  | 0.93068  | 0.999883  |
| gene2489 | gene2489 | SACOL2500 | gi 57650036 ref NC_002951.2 :2554001-2554394 | MR150 | M36C05 | OK     | 11.8083 | 19.9011 | 0.753043   | -1.04767  | 0.29479  | 0.977726  |

|          |          |           |                                              |       |        |        |         |         |             |             |          |           |
|----------|----------|-----------|----------------------------------------------|-------|--------|--------|---------|---------|-------------|-------------|----------|-----------|
| gene249  | gene249  | SACOL0259 | gi 57650036 ref NC_002951.2 :297672-298065   | MR150 | M36C05 | OK     | 5.51055 | 4.54882 | -0.276704   | 0.325054    | 0.74514  | 0.999883  |
| gene2490 | gene2490 | SACOL2501 | gi 57650036 ref NC_002951.2 :2554510-2556319 | MR150 | M36C05 | OK     | 31.8902 | 32.1942 | 0.0136901   | -0.017928   | 0.9857   | 0.999883  |
| gene2491 | gene2491 | SACOL2502 | gi 57650036 ref NC_002951.2 :2556602-2556869 | MR150 | M36C05 | OK     | 30.3751 | 96.7736 | 1.67173     | -2.36751    | 0.01791  | 0.242627  |
| gene2492 | gene2492 | SACOL2503 | gi 57650036 ref NC_002951.2 :2557012-2557321 | MR150 | M36C05 | OK     | 5.27132 | 29.4773 | 2.48337     | -2.97033    | 0.00297  | 0.0769228 |
| gene2493 | gene2493 | SACOL2504 | gi 57650036 ref NC_002951.2 :2557642-2558836 | MR150 | M36C05 | OK     | 3.69769 | 7.32045 | 0.985309    | -1.42349    | 0.1546   | 0.769852  |
| gene2494 | gene2494 | SACOL2505 | gi 57650036 ref NC_002951.2 :2559219-2562951 | MR150 | M36C05 | OK     | 7.85022 | 7.83002 | -0.0037161  | 0.005186    | 0.99586  | 0.999883  |
| gene2495 | gene2495 | sarT      | gi 57650036 ref NC_002951.2 :2563255-2563612 | MR150 | M36C05 | OK     | 2.87028 | 1.38231 | -1.05411    | 0.869199    | 0.38474  | 0.999883  |
| gene2496 | gene2496 | sarU      | gi 57650036 ref NC_002951.2 :2563935-2564679 | MR150 | M36C05 | NOTEST | 0       | 0.40562 | 1.79769e+30 | 1.79769e+30 | 0.06916  | 1         |
| gene2497 | gene2497 | galU      | gi 57650036 ref NC_002951.2 :2564889-2565756 | MR150 | M36C05 | OK     | 44.994  | 22.324  | -1.01114    | 1.43425     | 0.1515   | 0.757479  |
| gene2498 | gene2498 | fnbB      | gi 57650036 ref NC_002951.2 :2565935-2568758 | MR150 | M36C05 | OK     | 10.5119 | 5.37723 | -0.967092   | 1.37919     | 0.16784  | 0.806521  |
| gene2499 | gene2499 | SACOL2510 | gi 57650036 ref NC_002951.2 :2568918-2569041 | MR150 | M36C05 | NOTEST | 0       | 0       | 0           | 0           | 1        | 1         |
| gene25   | gene25   | SACOL0024 | gi 57650036 ref NC_002951.2 :31025-33344     | MR150 | M36C05 | OK     | 7.01187 | 4.31646 | -0.69995    | 1.0239      | 0.30588  | 0.991033  |
| gene250  | gene250  | SACOL0260 | gi 57650036 ref NC_002951.2 :298292-298697   | MR150 | M36C05 | NOTEST | 0       | 0       | 0           | 0           | 1        | 1         |
| gene2500 | gene2500 | fnbA      | gi 57650036 ref NC_002951.2 :2569439-2572496 | MR150 | M36C05 | OK     | 41.017  | 27.2674 | -0.589044   | 0.718113    | 0.47269  | 0.999883  |
| gene2501 | gene2501 | SACOL2513 | gi 57650036 ref NC_002951.2 :2572737-2572932 | MR150 | M36C05 | NOTEST | 0       | 0       | 0           | 0           | 1        | 1         |
| gene2502 | gene2502 | gntP      | gi 57650036 ref NC_002951.2 :2572963-2574322 | MR150 | M36C05 | OK     | 12.5536 | 6.84819 | -0.874309   | 1.27919     | 0.20083  | 0.869538  |
| gene2503 | gene2503 | gntK      | gi 57650036 ref NC_002951.2 :2574438-2575992 | MR150 | M36C05 | OK     | 7.46577 | 3.82613 | -0.964406   | 1.40889     | 0.15887  | 0.778782  |
| gene2504 | gene2504 | gntR      | gi 57650036 ref NC_002951.2 :2576015-2576696 | MR150 | M36C05 | OK     | 7.95654 | 5.73556 | -0.472206   | 0.663806    | 0.50682  | 0.999883  |
| gene2505 | gene2505 | SACOL2517 | gi 57650036 ref NC_002951.2 :2576849-2577614 | MR150 | M36C05 | OK     | 60.4277 | 53.697  | -0.17037    | 0.234157    | 0.81486  | 0.999883  |
| gene2506 | gene2506 | SACOL2518 | gi 57650036 ref NC_002951.2 :2577778-2578471 | MR150 | M36C05 | OK     | 22.047  | 19.6969 | -0.162612   | 0.238882    | 0.8112   | 0.999883  |
| gene2507 | gene2507 | SACOL2519 | gi 57650036 ref NC_002951.2 :2578701-2579190 | MR150 | M36C05 | OK     | 86.7909 | 2623.22 | 4.91765     | -5.75324    | 8.75E-09 | 2.04E-06  |
| gene2508 | gene2508 | SACOL2520 | gi 57650036 ref NC_002951.2 :2579256-2581149 | MR150 | M36C05 | OK     | 10.6758 | 30.2055 | 1.50047     | -2.05851    | 0.03954  | 0.387684  |
| gene2509 | gene2509 | SACOL2521 | gi 57650036 ref NC_002951.2 :2581557-2582835 | MR150 | M36C05 | OK     | 255.44  | 201.158 | -0.344659   | 0.379205    | 0.70454  | 0.999883  |
| gene251  | gene251  | SACOL0261 | gi 57650036 ref NC_002951.2 :298737-300114   | MR150 | M36C05 | OK     | 2.47234 | 2.52877 | 0.0325578   | -0.045418   | 0.96377  | 0.999883  |
| gene2510 | gene2510 | SACOL2522 | gi 57650036 ref NC_002951.2 :2583381-2583993 | MR150 | M36C05 | OK     | 46.4391 | 99.6677 | 1.10178     | -1.52752    | 0.12663  | 0.707666  |
| gene2511 | gene2511 | SACOL2523 | gi 57650036 ref NC_002951.2 :2584089-2585710 | MR150 | M36C05 | OK     | 3.17726 | 11.094  | 1.80392     | -2.54521    | 0.01092  | 0.176027  |
| gene2512 | gene2512 | SACOL2524 | gi 57650036 ref NC_002951.2 :2584089-2585710 | MR150 | M36C05 | NOTEST | 0.57684 | 0.83304 | 0.530213    | -0.128597   | 0.89768  | 1         |
| gene2513 | gene2513 | SACOL2525 | gi 57650036 ref NC_002951.2 :2586137-2586833 | MR150 | M36C05 | OK     | 6.17288 | 4.44945 | -0.472318   | 0.649371    | 0.5161   | 0.999883  |
| gene2514 | gene2514 | SACOL2526 | gi 57650036 ref NC_002951.2 :2586834-2587605 | MR150 | M36C05 | OK     | 8.04393 | 5.603   | -0.521701   | 0.743067    | 0.45744  | 0.999883  |
| gene2515 | gene2515 | SACOL2527 | gi 57650036 ref NC_002951.2 :2587977-2589942 | MR150 | M36C05 | OK     | 103.358 | 153.231 | 0.568054    | -0.630914   | 0.5281   | 0.999883  |
| gene2516 | gene2516 | SACOL2528 | gi 57650036 ref NC_002951.2 :2590285-2591365 | MR150 | M36C05 | OK     | 36.5444 | 21.1755 | -0.787256   | 1.10711     | 0.26825  | 0.952082  |
| gene2517 | gene2517 | SACOL2529 | gi 57650036 ref NC_002951.2 :2591469-2592063 | MR150 | M36C05 | OK     | 17.0926 | 28.0187 | 0.713025    | -1.04586    | 0.29563  | 0.978474  |
| gene2518 | gene2518 | SACOL2530 | gi 57650036 ref NC_002951.2 :2592084-2593053 | MR150 | M36C05 | OK     | 1.99127 | 7.17024 | 1.84833     | -2.5148     | 0.01191  | 0.186337  |

|          |          |             |                                              |       |        |        |         |         |             |             |          |           |
|----------|----------|-------------|----------------------------------------------|-------|--------|--------|---------|---------|-------------|-------------|----------|-----------|
| gene2519 | gene2519 | SACOL2531   | gi 57650036 ref NC_002951.2 :2593130-2593565 | MR150 | M36C05 | OK     | 18.8403 | 27.2128 | 0.530461    | -0.770318   | 0.44111  | 0.999883  |
| gene252  | gene252  | SACOL0262   | gi 57650036 ref NC_002951.2 :300347-301340   | MR150 | M36C05 | OK     | 5.4069  | 9.31702 | 0.785067    | -1.1406     | 0.25404  | 0.932194  |
| gene2520 | gene2520 | SACOL2532   | gi 57650036 ref NC_002951.2 :2593791-2594076 | MR150 | M36C05 | OK     | 62.521  | 252.557 | 2.0142      | -2.89366    | 0.00381  | 0.0910432 |
| gene2521 | gene2521 | SACOL2533   | gi 57650036 ref NC_002951.2 :2594246-2595053 | MR150 | M36C05 | OK     | 142.515 | 262.421 | 0.880771    | -1.04799    | 0.29465  | 0.977693  |
| gene2522 | gene2522 | frp         | gi 57650036 ref NC_002951.2 :2595172-2595844 | MR150 | M36C05 | OK     | 193.622 | 172.314 | -0.168201   | 0.207741    | 0.83543  | 0.999883  |
| gene2523 | gene2523 | SACOL2535   | gi 57650036 ref NC_002951.2 :2596113-2597106 | MR150 | M36C05 | OK     | 1256.14 | 877.608 | -0.517348   | 0.528999    | 0.59681  | 0.999883  |
| gene2524 | gene2524 | SACOL2536   | gi 57650036 ref NC_002951.2 :2597354-2598155 | MR150 | M36C05 | OK     | 9.68069 | 4.77227 | -1.02044    | 1.45327     | 0.14615  | 0.743774  |
| gene2525 | gene2525 | SACOL2537   | gi 57650036 ref NC_002951.2 :2598475-2599111 | MR150 | M36C05 | OK     | 4.91514 | 5.06296 | 0.0427499   | -0.057641   | 0.95404  | 0.999883  |
| gene2526 | gene2526 | SACOL2538   | gi 57650036 ref NC_002951.2 :2599116-2599848 | MR150 | M36C05 | OK     | 6.90656 | 7.46616 | 0.112401    | -0.160312   | 0.87264  | 0.999883  |
| gene2527 | gene2527 | srtA        | gi 57650036 ref NC_002951.2 :2600007-2600628 | MR150 | M36C05 | OK     | 133.07  | 95.6976 | -0.475627   | 0.627736    | 0.53018  | 0.999883  |
| gene2528 | gene2528 | SACOL2541   | gi 57650036 ref NC_002951.2 :2600821-2601313 | MR150 | M36C05 | OK     | 10.9998 | 32.5202 | 1.56386     | -2.24789    | 0.02458  | 0.297509  |
| gene2529 | gene2529 | SACOL2542   | gi 57650036 ref NC_002951.2 :2601750-2601921 | MR150 | M36C05 | OK     | 10.8213 | 7.63295 | -0.503566   | 0.278997    | 0.78025  | 0.999883  |
| gene253  | gene253  | lytM        | gi 57650036 ref NC_002951.2 :301647-302616   | MR150 | M36C05 | OK     | 127.84  | 156.741 | 0.294051    | -0.353055   | 0.72405  | 0.999883  |
| gene2530 | gene2530 | SACOL2543   | gi 57650036 ref NC_002951.2 :2601982-2602081 | MR150 | M36C05 | NOTEST | 0       | 0       | 0           | 0           | 1        | 1         |
| gene2531 | gene2531 | sdaAA       | gi 57650036 ref NC_002951.2 :2602099-2602999 | MR150 | M36C05 | OK     | 7.87482 | 9.45347 | 0.263598    | -0.385063   | 0.70019  | 0.999883  |
| gene2532 | gene2532 | sdaAB       | gi 57650036 ref NC_002951.2 :2603012-2603693 | MR150 | M36C05 | OK     | 1.90957 | 1.83538 | -0.0571682  | 0.066093    | 0.9473   | 0.999883  |
| gene2533 | gene2533 | SACOL2546   | gi 57650036 ref NC_002951.2 :2603695-2604739 | MR150 | M36C05 | OK     | 1.63296 | 2.74362 | 0.748589    | -0.977591   | 0.32828  | 0.999883  |
| gene2534 | gene2534 | SACOL2547   | gi 57650036 ref NC_002951.2 :2605290-2605494 | MR150 | M36C05 | OK     | 45.9906 | 49.2491 | 0.0987582   | -0.12732    | 0.89869  | 0.999883  |
| gene2535 | gene2535 | SACOL2548   | gi 57650036 ref NC_002951.2 :2605649-2606612 | MR150 | M36C05 | OK     | 26.4914 | 32.8092 | 0.308576    | -0.438475   | 0.66104  | 0.999883  |
| gene2536 | gene2536 | SACOL2549   | gi 57650036 ref NC_002951.2 :2606693-2607662 | MR150 | M36C05 | OK     | 60.3355 | 87.9071 | 0.542972    | -0.703986   | 0.48144  | 0.999883  |
| gene2537 | gene2537 | SACOL2550   | gi 57650036 ref NC_002951.2 :2607794-2608139 | MR150 | M36C05 | OK     | 17.4928 | 55.7528 | 1.67228     | -2.37742    | 0.01743  | 0.238061  |
| gene2538 | gene2538 | SACOL2551   | gi 57650036 ref NC_002951.2 :2608180-2608591 | MR150 | M36C05 | OK     | 29.6037 | 46.9358 | 0.664911    | -0.975058   | 0.32953  | 0.999883  |
| gene2539 | gene2539 | SACOL2552   | gi 57650036 ref NC_002951.2 :2608970-2611037 | MR150 | M36C05 | OK     | 3.03557 | 3.83684 | 0.337952    | -0.494385   | 0.62103  | 0.999883  |
| gene254  | gene254  | SACOL0264   | gi 57650036 ref NC_002951.2 :302667-303327   | MR150 | M36C05 | OK     | 10.9817 | 7.19747 | -0.60954    | 0.871622    | 0.38342  | 0.999883  |
| gene2540 | gene2540 | SACOL2553   | gi 57650036 ref NC_002951.2 :2611337-2613077 | MR150 | M36C05 | OK     | 22.975  | 169.691 | 2.88477     | -3.47673    | 0.00051  | 0.020294  |
| gene2541 | gene2541 | SACOL2554   | gi 57650036 ref NC_002951.2 :2613123-2614201 | MR150 | M36C05 | OK     | 9.68503 | 117.105 | 3.5959      | -4.80436    | 1.55E-06 | 0.0001628 |
| gene2542 | gene2542 | SACOL2554.1 | gi 57650036 ref NC_002951.2 :2613123-2614201 | MR150 | M36C05 | NOTEST | 0       | 0.56021 | 1.79769e+30 | 1.79769e+30 | 0.45417  | 1         |
| gene2543 | gene2543 | SACOL2555   | gi 57650036 ref NC_002951.2 :2614413-2615298 | MR150 | M36C05 | OK     | 16.5414 | 20.4486 | 0.305919    | -0.447456   | 0.65455  | 0.999883  |
| gene2544 | gene2544 | SACOL2556   | gi 57650036 ref NC_002951.2 :2615458-2615677 | MR150 | M36C05 | OK     | 4982.77 | 1548.34 | -1.68623    | 1.99582     | 0.04595  | 0.421504  |
| gene2545 | gene2545 | SACOL2557   | gi 57650036 ref NC_002951.2 :2616065-2616497 | MR150 | M36C05 | OK     | 159.222 | 52.7438 | -1.59396    | 2.24113     | 0.02502  | 0.300717  |
| gene2546 | gene2546 | SACOL2559   | gi 57650036 ref NC_002951.2 :2617256-2617514 | MR150 | M36C05 | OK     | 4.17126 | 2.99218 | -0.479285   | 0.375537    | 0.70726  | 0.999883  |
| gene2547 | gene2547 | SACOL2560   | gi 57650036 ref NC_002951.2 :2618092-2619370 | MR150 | M36C05 | OK     | 40.7738 | 23.419  | -0.799966   | 1.09395     | 0.27398  | 0.958793  |
| gene2548 | gene2548 | SACOL2561   | gi 57650036 ref NC_002951.2 :2619623-2620790 | MR150 | M36C05 | OK     | 102.149 | 30.2141 | -1.75738    | 2.27212     | 0.02308  | 0.288469  |

|          |          |           |                                              |       |        |        |         |         |           |           |          |           |
|----------|----------|-----------|----------------------------------------------|-------|--------|--------|---------|---------|-----------|-----------|----------|-----------|
| gene2549 | gene2549 | ogt       | gi 57650036 ref NC_002951.2 :2620959-2621481 | MR150 | M36C05 | OK     | 361.592 | 292.857 | -0.304164 | 0.366876  | 0.71371  | 0.999883  |
| gene255  | gene255  | SACOL0265 | gi 57650036 ref NC_002951.2 :303340-305424   | MR150 | M36C05 | OK     | 2.7609  | 5.04779 | 0.870512  | -0.742286 | 0.45791  | 0.999883  |
| gene2550 | gene2550 | SACOL2563 | gi 57650036 ref NC_002951.2 :2621889-2623995 | MR150 | M36C05 | OK     | 10.6884 | 307.139 | 4.84477   | -5.72455  | 1.04E-08 | 2.35E-06  |
| gene2551 | gene2551 | feoB      | gi 57650036 ref NC_002951.2 :2624246-2626241 | MR150 | M36C05 | OK     | 1.02399 | 2.27169 | 1.14957   | -1.57703  | 0.11479  | 0.670749  |
| gene2552 | gene2552 | SACOL2565 | gi 57650036 ref NC_002951.2 :2626252-2626480 | MR150 | M36C05 | NOTEST | 0       | 0       | 0         | 0         | 1        | 1         |
| gene2553 | gene2553 | SACOL2566 | gi 57650036 ref NC_002951.2 :2626695-2629185 | MR150 | M36C05 | OK     | 7.29104 | 1.3955  | -2.38534  | 3.40265   | 0.00067  | 0.0252863 |
| gene2554 | gene2554 | SACOL2567 | gi 57650036 ref NC_002951.2 :2629392-2629878 | MR150 | M36C05 | OK     | 2.13895 | 7.33508 | 1.77791   | -2.08575  | 0.037    | 0.369812  |
| gene2555 | gene2555 | SACOL2568 | gi 57650036 ref NC_002951.2 :2629954-2630122 | MR150 | M36C05 | OK     | 24.007  | 8.4513  | -1.50621  | 0.93838   | 0.34805  | 0.999883  |
| gene2556 | gene2556 | SACOL2569 | gi 57650036 ref NC_002951.2 :2630233-2631778 | MR150 | M36C05 | OK     | 264.302 | 287.652 | 0.122133  | -0.129165 | 0.89723  | 0.999883  |
| gene2557 | gene2557 | SACOL2570 | gi 57650036 ref NC_002951.2 :2631967-2632567 | MR150 | M36C05 | OK     | 14.9232 | 24.562  | 0.718867  | -1.05339  | 0.29216  | 0.976283  |
| gene2558 | gene2558 | SACOL2571 | gi 57650036 ref NC_002951.2 :2632805-2632997 | MR150 | M36C05 | OK     | 180.142 | 107.006 | -0.751446 | 1.06238   | 0.28806  | 0.975616  |
| gene2559 | gene2559 | SACOL2572 | gi 57650036 ref NC_002951.2 :2633236-2635645 | MR150 | M36C05 | OK     | 30.5801 | 86.7515 | 1.5043    | -1.79458  | 0.07272  | 0.528391  |
| gene256  | gene256  | SACOL0266 | gi 57650036 ref NC_002951.2 :303340-305424   | MR150 | M36C05 | OK     | 5.70134 | 4.33259 | -0.39607  | 0.457797  | 0.6471   | 0.999883  |
| gene2560 | gene2560 | SACOL2573 | gi 57650036 ref NC_002951.2 :2635935-2636142 | MR150 | M36C05 | OK     | 186.331 | 247.571 | 0.409973  | -0.601772 | 0.54733  | 0.999883  |
| gene2561 | gene2561 | SACOL2574 | gi 57650036 ref NC_002951.2 :2636231-2637230 | MR150 | M36C05 | OK     | 50.7883 | 89.4335 | 0.816317  | -1.06163  | 0.2884   | 0.975616  |
| gene2562 | gene2562 | SACOL2575 | gi 57650036 ref NC_002951.2 :2637252-2638407 | MR150 | M36C05 | OK     | 21.0071 | 37.2902 | 0.827918  | -1.15533  | 0.24796  | 0.922459  |
| gene2563 | gene2563 | crtN      | gi 57650036 ref NC_002951.2 :2638833-2640342 | MR150 | M36C05 | OK     | 12.6366 | 36.0407 | 1.51202   | -2.08736  | 0.03686  | 0.369812  |
| gene2564 | gene2564 | crtM      | gi 57650036 ref NC_002951.2 :2640353-2641217 | MR150 | M36C05 | OK     | 10.3769 | 39.5345 | 1.92974   | -2.76672  | 0.00566  | 0.116747  |
| gene2565 | gene2565 | SACOL2578 | gi 57650036 ref NC_002951.2 :2641253-2644361 | MR150 | M36C05 | OK     | 12.7482 | 95.6652 | 2.9077    | -2.13154  | 0.03304  | 0.34869   |
| gene2566 | gene2566 | SACOL2579 | gi 57650036 ref NC_002951.2 :2641253-2644361 | MR150 | M36C05 | OK     | 14.5584 | 99.8358 | 2.7777    | -2.48802  | 0.01285  | 0.194869  |
| gene2567 | gene2567 | SACOL2580 | gi 57650036 ref NC_002951.2 :2641253-2644361 | MR150 | M36C05 | OK     | 8.99662 | 81.7607 | 3.18395   | -1.1504   | 0.24998  | 0.924551  |
| gene2568 | gene2568 | SACOL2581 | gi 57650036 ref NC_002951.2 :2644535-2645303 | MR150 | M36C05 | OK     | 526.693 | 159.656 | -1.72199  | 1.97353   | 0.04843  | 0.43221   |
| gene2569 | gene2569 | SACOL2582 | gi 57650036 ref NC_002951.2 :2645663-2647475 | MR150 | M36C05 | OK     | 33.0661 | 19.2122 | -0.783329 | 1.05042   | 0.29352  | 0.976946  |
| gene257  | gene257  | SACOL0267 | gi 57650036 ref NC_002951.2 :305491-307015   | MR150 | M36C05 | OK     | 27.1848 | 31.7193 | 0.22256   | -0.299864 | 0.76428  | 0.999883  |
| gene2570 | gene2570 | SACOL2583 | gi 57650036 ref NC_002951.2 :2647986-2648475 | MR150 | M36C05 | NOTEST | 0       | 0       | 0         | 0         | 1        | 1         |
| gene2571 | gene2571 | isaA      | gi 57650036 ref NC_002951.2 :2648750-2649452 | MR150 | M36C05 | OK     | 2945.28 | 402.47  | -2.87145  | 3.08407   | 0.00204  | 0.0581771 |
| gene2572 | gene2572 | SACOL2585 | gi 57650036 ref NC_002951.2 :2650059-2651115 | MR150 | M36C05 | OK     | 2.68347 | 3.73564 | 0.477257  | -0.659161 | 0.50979  | 0.999883  |
| gene2573 | gene2573 | SACOL2587 | gi 57650036 ref NC_002951.2 :2651491-2652094 | MR150 | M36C05 | OK     | 19.3699 | 12.8742 | -0.589333 | 0.861004  | 0.38924  | 0.999883  |
| gene2574 | gene2574 | SACOL2588 | gi 57650036 ref NC_002951.2 :2652291-2652792 | MR150 | M36C05 | OK     | 5.08197 | 3.30163 | -0.62221  | 0.764086  | 0.44482  | 0.999883  |
| gene2575 | gene2575 | SACOL2589 | gi 57650036 ref NC_002951.2 :2653011-2653242 | MR150 | M36C05 | OK     | 5.82901 | 20.8522 | 1.83888   | -1.81664  | 0.06927  | 0.522414  |
| gene2576 | gene2576 | SACOL2590 | gi 57650036 ref NC_002951.2 :2653391-2653769 | MR150 | M36C05 | OK     | 35.722  | 47.3052 | 0.405187  | -0.594538 | 0.55215  | 0.999883  |
| gene2577 | gene2577 | SACOL2591 | gi 57650036 ref NC_002951.2 :2653785-2654607 | MR150 | M36C05 | OK     | 13.0464 | 15.4289 | 0.241975  | -0.355746 | 0.72203  | 0.999883  |
| gene2578 | gene2578 | SACOL2592 | gi 57650036 ref NC_002951.2 :2654626-2654926 | MR150 | M36C05 | OK     | 1.41379 | 2.03801 | 0.52759   | -0.347117 | 0.7285   | 0.999883  |

|          |          |           |                                              |       |        |        |         |         |            |           |          |           |
|----------|----------|-----------|----------------------------------------------|-------|--------|--------|---------|---------|------------|-----------|----------|-----------|
| gene2579 | gene2579 | SACOL2593 | gi 57650036 ref NC_002951.2 :2655056-2656311 | MR150 | M36C05 | OK     | 11.1143 | 2.77569 | -2.00149   | 1.98519   | 0.04712  | 0.426221  |
| gene258  | gene258  | SACOL0268 | gi 57650036 ref NC_002951.2 :307285-307939   | MR150 | M36C05 | NOTEST | 0       | 0       | 0          | 0         | 1        | 1         |
| gene2580 | gene2580 | SACOL2594 | gi 57650036 ref NC_002951.2 :2655056-2656311 | MR150 | M36C05 | OK     | 4.85036 | 2.62201 | -0.88742   | 0.848984  | 0.39589  | 0.999883  |
| gene2581 | gene2581 | SACOL2595 | gi 57650036 ref NC_002951.2 :2656320-2657419 | MR150 | M36C05 | NOTEST | 0       | 0       | 0          | 0         | 1        | 1         |
| gene2582 | gene2582 | SACOL2596 | gi 57650036 ref NC_002951.2 :2656320-2657419 | MR150 | M36C05 | OK     | 9.06334 | 6.25463 | -0.535118  | 0.773944  | 0.43896  | 0.999883  |
| gene2583 | gene2583 | SACOL2597 | gi 57650036 ref NC_002951.2 :2657438-2658269 | MR150 | M36C05 | OK     | 18.1988 | 83.2097 | 2.19291    | -3.02632  | 0.00248  | 0.0683793 |
| gene2584 | gene2584 | SACOL2598 | gi 57650036 ref NC_002951.2 :2658415-2659306 | MR150 | M36C05 | OK     | 4.87503 | 6.22489 | 0.352636   | -0.502478 | 0.61533  | 0.999883  |
| gene2585 | gene2585 | SACOL2599 | gi 57650036 ref NC_002951.2 :2659403-2660723 | MR150 | M36C05 | OK     | 8.06785 | 4.72456 | -0.772005  | 1.12877   | 0.259    | 0.938582  |
| gene2586 | gene2586 | SACOL2600 | gi 57650036 ref NC_002951.2 :2660737-2661844 | MR150 | M36C05 | OK     | 8.44213 | 6.19982 | -0.445381  | 0.651766  | 0.51455  | 0.999883  |
| gene2587 | gene2587 | SACOL2601 | gi 57650036 ref NC_002951.2 :2662177-2662830 | MR150 | M36C05 | OK     | 4.34557 | 10.4359 | 1.26393    | -0.893648 | 0.37151  | 0.999883  |
| gene2588 | gene2588 | SACOL2602 | gi 57650036 ref NC_002951.2 :2662177-2662830 | MR150 | M36C05 | OK     | 8.03925 | 14.1953 | 0.82028    | -0.947749 | 0.34326  | 0.999883  |
| gene2589 | gene2589 | SACOL2603 | gi 57650036 ref NC_002951.2 :2662844-2663123 | MR150 | M36C05 | OK     | 1.69174 | 7.29727 | 2.10885    | -1.5741   | 0.11546  | 0.671711  |
| gene259  | gene259  | SACOL0269 | gi 57650036 ref NC_002951.2 :307972-308560   | MR150 | M36C05 | NOTEST | 0.78893 | 0.85358 | 0.113629   | -0.099032 | 0.92111  | 1         |
| gene2590 | gene2590 | SACOL2605 | gi 57650036 ref NC_002951.2 :2663464-2664274 | MR150 | M36C05 | OK     | 4.01598 | 51.7193 | 3.68688    | -5.06143  | 4.16E-07 | 5.79E-05  |
| gene2591 | gene2591 | pyrD      | gi 57650036 ref NC_002951.2 :2664548-2665613 | MR150 | M36C05 | OK     | 3.71778 | 2.54947 | -0.544244  | 0.749845  | 0.45335  | 0.999883  |
| gene2592 | gene2592 | SACOL2607 | gi 57650036 ref NC_002951.2 :2665767-2666043 | MR150 | M36C05 | OK     | 41.7473 | 40.0039 | -0.0615449 | 0.087391  | 0.93036  | 0.999883  |
| gene2593 | gene2593 | SACOL2608 | gi 57650036 ref NC_002951.2 :2666228-2666951 | MR150 | M36C05 | OK     | 27.2231 | 12.8691 | -1.08093   | 1.57994   | 0.11412  | 0.670364  |
| gene2594 | gene2594 | SACOL2609 | gi 57650036 ref NC_002951.2 :2667304-2667754 | MR150 | M36C05 | OK     | 1837.71 | 1036.24 | -0.82655   | 0.881488  | 0.37805  | 0.999883  |
| gene2595 | gene2595 | SACOL2610 | gi 57650036 ref NC_002951.2 :2667834-2668422 | MR150 | M36C05 | OK     | 13.4119 | 15.649  | 0.222563   | -0.324306 | 0.74571  | 0.999883  |
| gene2596 | gene2596 | SACOL2612 | gi 57650036 ref NC_002951.2 :2668554-2670237 | MR150 | M36C05 | OK     | 6.19683 | 6.31733 | 0.0277851  | -0.040857 | 0.96741  | 0.999883  |
| gene2597 | gene2597 | panD      | gi 57650036 ref NC_002951.2 :2670365-2670749 | MR150 | M36C05 | OK     | 41.2052 | 19.0481 | -1.11318   | 1.60607   | 0.10826  | 0.653986  |
| gene2598 | gene2598 | panC      | gi 57650036 ref NC_002951.2 :2670750-2672413 | MR150 | M36C05 | OK     | 20.6659 | 24.6992 | 0.257213   | -0.228293 | 0.81942  | 0.999883  |
| gene2599 | gene2599 | panB      | gi 57650036 ref NC_002951.2 :2670750-2672413 | MR150 | M36C05 | OK     | 32.403  | 32.0767 | -0.0146038 | 0.015088  | 0.98796  | 0.999883  |
| gene26   | gene26   | SACOL0025 | gi 57650036 ref NC_002951.2 :33575-34055     | MR150 | M36C05 | OK     | 46.4214 | 33.5158 | -0.469949  | 0.688993  | 0.49083  | 0.999883  |
| gene260  | gene260  | SACOL0270 | gi 57650036 ref NC_002951.2 :308702-309596   | MR150 | M36C05 | OK     | 6.83968 | 8.74069 | 0.353818   | -0.514375 | 0.60699  | 0.999883  |
| gene2600 | gene2600 | SACOL2616 | gi 57650036 ref NC_002951.2 :2672485-2673346 | MR150 | M36C05 | OK     | 17.3733 | 18.1884 | 0.0661483  | -0.096958 | 0.92276  | 0.999883  |
| gene2601 | gene2601 | budA2     | gi 57650036 ref NC_002951.2 :2673431-2674136 | MR150 | M36C05 | OK     | 28.4959 | 16.8246 | -0.760185  | 1.11268   | 0.26585  | 0.948966  |
| gene2602 | gene2602 | ldh2      | gi 57650036 ref NC_002951.2 :2674413-2675373 | MR150 | M36C05 | OK     | 11.2831 | 26.4091 | 1.22687    | -1.78129  | 0.07486  | 0.539636  |
| gene2603 | gene2603 | SACOL2619 | gi 57650036 ref NC_002951.2 :2676059-2677508 | MR150 | M36C05 | OK     | 82.5261 | 280.475 | 1.76495    | -1.99212  | 0.04636  | 0.423595  |
| gene2604 | gene2604 | SACOL2620 | gi 57650036 ref NC_002951.2 :2677588-2678926 | MR150 | M36C05 | OK     | 15.2077 | 101.811 | 2.74302    | -3.56745  | 0.00036  | 0.015577  |
| gene2605 | gene2605 | SACOL2621 | gi 57650036 ref NC_002951.2 :2679183-2679600 | MR150 | M36C05 | OK     | 4.91781 | 104.02  | 4.4027     | -5.70995  | 1.13E-08 | 2.48E-06  |
| gene2606 | gene2606 | fdaB      | gi 57650036 ref NC_002951.2 :2679722-2680613 | MR150 | M36C05 | OK     | 197.882 | 550.663 | 1.47653    | -1.63573  | 0.1019   | 0.641366  |
| gene2607 | gene2607 | mqa2      | gi 57650036 ref NC_002951.2 :2680805-2682302 | MR150 | M36C05 | OK     | 457.943 | 309.947 | -0.563145  | 0.585209  | 0.55841  | 0.999883  |

|          |          |           |                                              |       |        |        |         |         |                        |           |          |           |
|----------|----------|-----------|----------------------------------------------|-------|--------|--------|---------|---------|------------------------|-----------|----------|-----------|
| gene2608 | gene2608 | SACOL2624 | gi 57650036 ref NC_002951.2 :2682986-2684585 | MR150 | M36C05 | OK     | 107.509 | 161.513 | 0.587186               | -0.664705 | 0.50624  | 0.999883  |
| gene2609 | gene2609 | SACOL2625 | gi 57650036 ref NC_002951.2 :2684778-2685222 | MR150 | M36C05 | OK     | 16.9022 | 195.298 | 3.53039                | -4.84913  | 1.24E-06 | 0.000136  |
| gene261  | gene261  | SACOL0271 | gi 57650036 ref NC_002951.2 :309843-310137   | MR150 | M36C05 | OK     | 437.991 | 1084.18 | 1.30763                | -1.64343  | 0.10029  | 0.638047  |
| gene2610 | gene2610 | SACOL2626 | gi 57650036 ref NC_002951.2 :2685502-2685715 | MR150 | M36C05 | OK     | 62.0228 | 27.7004 | -1.16289               | 1.4884    | 0.13665  | 0.732537  |
| gene2611 | gene2611 | betA      | gi 57650036 ref NC_002951.2 :2685992-2687702 | MR150 | M36C05 | OK     | 115.838 | 2.91968 | -5.31016               | 6.70552   | 2.01E-11 | 9.68E-09  |
| gene2612 | gene2612 | betB      | gi 57650036 ref NC_002951.2 :2687962-2689453 | MR150 | M36C05 | OK     | 195.75  | 2.81761 | -6.11839               | 7.51194   | 5.82E-14 | 7.00E-11  |
| gene2613 | gene2613 | SACOL2629 | gi 57650036 ref NC_002951.2 :2689521-2689617 | MR150 | M36C05 | NOTEST | 0       | 0       | 0                      | 0         | 1        | 1         |
| gene2614 | gene2614 | SACOL2630 | gi 57650036 ref NC_002951.2 :2689705-2690269 | MR150 | M36C05 | OK     | 42.4641 | 10.0095 | -2.08487               | 2.99535   | 0.00274  | 0.0721416 |
| gene2615 | gene2615 | SACOL2631 | gi 57650036 ref NC_002951.2 :2690456-2691143 | MR150 | M36C05 | NOTEST | 0       | 0       | 0                      | 0         | 1        | 1         |
| gene2616 | gene2616 | cudT      | gi 57650036 ref NC_002951.2 :2691406-2693029 | MR150 | M36C05 | OK     | 154.24  | 3.40812 | -5.50006               | 6.85945   | 6.91E-12 | 3.85E-09  |
| gene2617 | gene2617 | nrdG      | gi 57650036 ref NC_002951.2 :2693547-2695931 | MR150 | M36C05 | OK     | 18.1622 | 85.1893 | 2.22973                | -1.7505   | 0.08003  | 0.562869  |
| gene2618 | gene2618 | nrdD      | gi 57650036 ref NC_002951.2 :2693547-2695931 | MR150 | M36C05 | OK     | 6.12305 | 35.1131 | 2.51969                | -2.69761  | 0.00698  | 0.13442   |
| gene2619 | gene2619 | SACOL2636 | gi 57650036 ref NC_002951.2 :2696177-2697548 | MR150 | M36C05 | OK     | 0.78474 | 1.88277 | 1.26257                | -1.57245  | 0.11585  | 0.672851  |
| gene262  | gene262  | SACOL0272 | gi 57650036 ref NC_002951.2 :310220-313922   | MR150 | M36C05 | OK     | 6.6578  | 5.48996 | -0.278252              | 0.378048  | 0.7054   | 0.999883  |
| gene2620 | gene2620 | SACOL2637 | gi 57650036 ref NC_002951.2 :2697869-2697965 | MR150 | M36C05 | NOTEST | 0       | 0       | 0                      | 0         | 1        | 1         |
| gene2621 | gene2621 | SACOL2638 | gi 57650036 ref NC_002951.2 :2698040-2698646 | MR150 | M36C05 | OK     | 8.67095 | 3.80647 | -1.18773               | 1.59773   | 0.1101   | 0.659073  |
| gene2622 | gene2622 | cysJ      | gi 57650036 ref NC_002951.2 :2698708-2700589 | MR150 | M36C05 | OK     | 7.10722 | 3.99934 | -0.829522              | 1.21567   | 0.22411  | 0.89446   |
| gene2623 | gene2623 | SACOL2640 | gi 57650036 ref NC_002951.2 :2700783-2700876 | MR150 | M36C05 | NOTEST | 0       | 0       | 0                      | 0         | 1        | 1         |
| gene2624 | gene2624 | gpxA2     | gi 57650036 ref NC_002951.2 :2700983-2701481 | MR150 | M36C05 | OK     | 2.56647 | 12.2278 | 2.2523                 | -2.79328  | 0.00522  | 0.110421  |
| gene2625 | gene2625 | SACOL2642 | gi 57650036 ref NC_002951.2 :2702175-2702289 | MR150 | M36C05 | NOTEST | 0       | 0       | 0                      | 0         | 1        | 1         |
| gene2626 | gene2626 | SACOL2643 | gi 57650036 ref NC_002951.2 :2702904-2705666 | MR150 | M36C05 | OK     | 8.93007 | 6.05805 | -0.559817              | 0.718053  | 0.47273  | 0.999883  |
| gene2627 | gene2627 | SACOL2644 | gi 57650036 ref NC_002951.2 :2702904-2705666 | MR150 | M36C05 | OK     | 7.85832 | 5.0768  | -0.630299              | 0.419426  | 0.67491  | 0.999883  |
| gene2628 | gene2628 | nsaS      | gi 57650036 ref NC_002951.2 :2705764-2706652 | MR150 | M36C05 | OK     | 14.0212 | 5.77114 | -1.28068               | 1.85667   | 0.06336  | 0.504373  |
| gene2629 | gene2629 | SACOL2646 | gi 57650036 ref NC_002951.2 :2706662-2707328 | MR150 | M36C05 | OK     | 22.0093 | 12.5515 | -0.810255              | 1.18654   | 0.23541  | 0.904919  |
| gene263  | gene263  | SACOL0273 | gi 57650036 ref NC_002951.2 :310220-313922   | MR150 | M36C05 | OK     | 9.4416  | 6.39165 | -0.562842              | 0.261717  | 0.79354  | 0.999883  |
| gene2630 | gene2630 | SACOL2647 | gi 57650036 ref NC_002951.2 :2707353-2707554 | MR150 | M36C05 | OK     | 29.3703 | 13.9733 | -1.07168               | 1.12577   | 0.26026  | 0.939875  |
| gene2631 | gene2631 | SACOL2648 | gi 57650036 ref NC_002951.2 :2707751-2709176 | MR150 | M36C05 | OK     | 1.87539 | 3.23948 | 0.788573               | -1.09814  | 0.27214  | 0.956064  |
| gene2632 | gene2632 | SACOL2649 | gi 57650036 ref NC_002951.2 :2709235-2709337 | MR150 | M36C05 | OK     | 6494.11 | 0       | -1.79769e+3(-1.79769e+ | 0.10824   | 0.653986 |           |
| gene2633 | gene2633 | SACOL2650 | gi 57650036 ref NC_002951.2 :2709458-2709914 | MR150 | M36C05 | OK     | 19.6995 | 16.8117 | -0.228699              | 0.330302  | 0.74117  | 0.999883  |
| gene2634 | gene2634 | SACOL2651 | gi 57650036 ref NC_002951.2 :2710158-2710920 | MR150 | M36C05 | OK     | 6.2657  | 7.85223 | 0.325625               | -0.465211 | 0.64178  | 0.999883  |
| gene2635 | gene2635 | clfB      | gi 57650036 ref NC_002951.2 :2711035-2713777 | MR150 | M36C05 | OK     | 77.9766 | 130.089 | 0.738389               | -0.808553 | 0.41877  | 0.999883  |
| gene2636 | gene2636 | SACOL2653 | gi 57650036 ref NC_002951.2 :2714126-2714813 | MR150 | M36C05 | OK     | 42.122  | 24.925  | -0.756981              | 1.09603   | 0.27306  | 0.958372  |
| gene2637 | gene2637 | arcC2     | gi 57650036 ref NC_002951.2 :2714929-2715871 | MR150 | M36C05 | OK     | 18.5732 | 11.4444 | -0.698579              | 1.02329   | 0.30617  | 0.991033  |

|          |          |           |                                              |       |        |        |         |         |             |             |          |           |
|----------|----------|-----------|----------------------------------------------|-------|--------|--------|---------|---------|-------------|-------------|----------|-----------|
| gene2638 | gene2638 | arcD      | gi 57650036 ref NC_002951.2 :2715887-2717318 | MR150 | M36C05 | OK     | 7.83826 | 9.93969 | 0.342667    | -0.502778   | 0.61512  | 0.999883  |
| gene2639 | gene2639 | arcB2     | gi 57650036 ref NC_002951.2 :2717408-2718419 | MR150 | M36C05 | OK     | 5.47577 | 4.89493 | -0.161773   | 0.232219    | 0.81637  | 0.999883  |
| gene264  | gene264  | SACOL0274 | gi 57650036 ref NC_002951.2 :310220-313922   | MR150 | M36C05 | NOTEST | 0       | 0       | 0           | 0           | 1        | 1         |
| gene2640 | gene2640 | arcA      | gi 57650036 ref NC_002951.2 :2718451-2719687 | MR150 | M36C05 | OK     | 7.8348  | 2.55397 | -1.61715    | 2.30091     | 0.0214   | 0.273585  |
| gene2641 | gene2641 | SACOL2658 | gi 57650036 ref NC_002951.2 :2720033-2720483 | MR150 | M36C05 | OK     | 1.83344 | 2.64798 | 0.530342    | -0.54258    | 0.58742  | 0.999883  |
| gene2642 | gene2642 | aur       | gi 57650036 ref NC_002951.2 :2720849-2722379 | MR150 | M36C05 | OK     | 2.41832 | 1.16028 | -1.05954    | 1.42029     | 0.15552  | 0.769852  |
| gene2643 | gene2643 | isaB      | gi 57650036 ref NC_002951.2 :2722802-2723330 | MR150 | M36C05 | NOTEST | 0       | 0.6733  | 1.79769e+30 | 1.79769e+30 | 0.06916  | 1         |
| gene2644 | gene2644 | SACOL2661 | gi 57650036 ref NC_002951.2 :2723587-2724046 | MR150 | M36C05 | NOTEST | 0       | 0       | 0           | 0           | 1        | 1         |
| gene2645 | gene2645 | SACOL2662 | gi 57650036 ref NC_002951.2 :2724285-2726160 | MR150 | M36C05 | OK     | 4.20645 | 4.80325 | 0.191409    | -0.281123   | 0.77862  | 0.999883  |
| gene2646 | gene2646 | SACOL2663 | gi 57650036 ref NC_002951.2 :2726236-2728189 | MR150 | M36C05 | OK     | 4.1067  | 5.28098 | 0.362828    | -0.53307    | 0.59399  | 0.999883  |
| gene2647 | gene2647 | manA2     | gi 57650036 ref NC_002951.2 :2728202-2729141 | MR150 | M36C05 | OK     | 7.66665 | 9.10322 | 0.247781    | -0.362232   | 0.71718  | 0.999883  |
| gene2648 | gene2648 | SACOL2665 | gi 57650036 ref NC_002951.2 :2729252-2732234 | MR150 | M36C05 | OK     | 21.199  | 10.8129 | -0.971235   | 1.29676     | 0.19471  | 0.856906  |
| gene2649 | gene2649 | SACOL2666 | gi 57650036 ref NC_002951.2 :2732444-2734304 | MR150 | M36C05 | OK     | 41.4295 | 72.7665 | 0.812617    | -0.995696   | 0.3194   | 0.999883  |
| gene265  | gene265  | SACOL0275 | gi 57650036 ref NC_002951.2 :313934-315269   | MR150 | M36C05 | OK     | 1.88911 | 1.74828 | -0.111776   | 0.149669    | 0.88103  | 0.999883  |
| gene2650 | gene2650 | SACOL2667 | gi 57650036 ref NC_002951.2 :2734570-2735131 | MR150 | M36C05 | OK     | 81.8175 | 120.502 | 0.558581    | -0.758814   | 0.44796  | 0.999883  |
| gene2651 | gene2651 | SACOL2668 | gi 57650036 ref NC_002951.2 :2735298-2737206 | MR150 | M36C05 | OK     | 24.7512 | 56.1377 | 1.18147     | -1.5046     | 0.13243  | 0.721045  |
| gene2652 | gene2652 | SACOL2669 | gi 57650036 ref NC_002951.2 :2737447-2740307 | MR150 | M36C05 | OK     | 16.2536 | 50.1249 | 1.62477     | -1.29405    | 0.19565  | 0.858652  |
| gene2653 | gene2653 | SACOL2670 | gi 57650036 ref NC_002951.2 :2737447-2740307 | MR150 | M36C05 | OK     | 17.5508 | 69.3869 | 1.98313     | -1.87367    | 0.06098  | 0.498626  |
| gene2654 | gene2654 | SACOL2671 | gi 57650036 ref NC_002951.2 :2740324-2746753 | MR150 | M36C05 | OK     | 14.4019 | 75.7456 | 2.3949      | -2.71111    | 0.00671  | 0.130108  |
| gene2655 | gene2655 | SACOL2672 | gi 57650036 ref NC_002951.2 :2740324-2746753 | MR150 | M36C05 | OK     | 4.23117 | 2.03147 | -1.05853    | 0.155081    | 0.87676  | 0.999883  |
| gene2656 | gene2656 | SACOL2673 | gi 57650036 ref NC_002951.2 :2740324-2746753 | MR150 | M36C05 | OK     | 1.90194 | 2.2544  | 0.245277    | -0.048197   | 0.96156  | 0.999883  |
| gene2657 | gene2657 | SACOL2674 | gi 57650036 ref NC_002951.2 :2740324-2746753 | MR150 | M36C05 | OK     | 2.60171 | 1.46533 | -0.828237   | 0.136679    | 0.89129  | 0.999883  |
| gene2658 | gene2658 | secY      | gi 57650036 ref NC_002951.2 :2746763-2747975 | MR150 | M36C05 | OK     | 2.26996 | 0.65365 | -1.79608    | 2.14146     | 0.03224  | 0.344846  |
| gene2659 | gene2659 | SACOL2676 | gi 57650036 ref NC_002951.2 :2748104-2754890 | MR150 | M36C05 | OK     | 9.74625 | 6.95877 | -0.486015   | 0.632426    | 0.52711  | 0.999883  |
| gene266  | gene266  | yukA      | gi 57650036 ref NC_002951.2 :315290-319730   | MR150 | M36C05 | OK     | 3.32394 | 1.5851  | -1.06832    | 1.56182     | 0.11833  | 0.682358  |
| gene2660 | gene2660 | SACOL2677 | gi 57650036 ref NC_002951.2 :2755243-2755354 | MR150 | M36C05 | NOTEST | 0       | 0       | 0           | 0           | 1        | 1         |
| gene2661 | gene2661 | SACOL2678 | gi 57650036 ref NC_002951.2 :2755434-2756127 | MR150 | M36C05 | OK     | 0.31052 | 2.46211 | 2.98714     | -2.2955     | 0.0217   | 0.276542  |
| gene2662 | gene2662 | SACOL2680 | gi 57650036 ref NC_002951.2 :2756807-2757110 | MR150 | M36C05 | OK     | 0       | 5.97231 | 1.79769e+30 | 1.79769e+30 | 0.0141   | 0.204943  |
| gene2663 | gene2663 | SACOL2681 | gi 57650036 ref NC_002951.2 :2757263-2757623 | MR150 | M36C05 | OK     | 14.1018 | 634.983 | 5.49277     | -7.01291    | 2.33E-12 | 1.88E-09  |
| gene2664 | gene2664 | SACOL2682 | gi 57650036 ref NC_002951.2 :2757707-2758319 | MR150 | M36C05 | OK     | 2.60059 | 30.2754 | 3.54123     | -4.64805    | 3.35E-06 | 0.0003191 |
| gene2665 | gene2665 | SACOL2683 | gi 57650036 ref NC_002951.2 :2758397-2758874 | MR150 | M36C05 | OK     | 3.31209 | 2.39135 | -0.469916   | 0.524453    | 0.59996  | 0.999883  |
| gene2666 | gene2666 | SACOL2684 | gi 57650036 ref NC_002951.2 :2758876-2759377 | MR150 | M36C05 | OK     | 2.03279 | 1.83424 | -0.148279   | 0.154327    | 0.87735  | 0.999883  |
| gene2667 | gene2667 | cap1C     | gi 57650036 ref NC_002951.2 :2759611-2761068 | MR150 | M36C05 | OK     | 2.69546 | 1.74806 | -0.624778   | 0.635127    | 0.52535  | 0.999883  |

|          |          |           |                                              |       |        |        |         |         |             |           |         |           |
|----------|----------|-----------|----------------------------------------------|-------|--------|--------|---------|---------|-------------|-----------|---------|-----------|
| gene2668 | gene2668 | cap1B     | gi 57650036 ref NC_002951.2 :2759611-2761068 | MR150 | M36C05 | OK     | 1.24208 | 2.01446 | 0.697629    | -0.555227 | 0.57874 | 0.999883  |
| gene2669 | gene2669 | cap1A     | gi 57650036 ref NC_002951.2 :2761084-2761747 | MR150 | M36C05 | NOTEST | 0.33062 | 0.71508 | 1.1129      | -0.787372 | 0.43106 | 1         |
| gene267  | gene267  | SACOL0277 | gi 57650036 ref NC_002951.2 :319759-320152   | MR150 | M36C05 | NOTEST | 0       | 0       | 0           | 0         | 1       | 1         |
| gene2670 | gene2670 | icaR      | gi 57650036 ref NC_002951.2 :2762595-2763156 | MR150 | M36C05 | OK     | 36.4575 | 25.385  | -0.522239   | 0.765554  | 0.44394 | 0.999883  |
| gene2671 | gene2671 | icaA      | gi 57650036 ref NC_002951.2 :2763319-2766734 | MR150 | M36C05 | OK     | 0.8844  | 1.59162 | 0.847728    | -0.568503 | 0.56969 | 0.999883  |
| gene2672 | gene2672 | icaD      | gi 57650036 ref NC_002951.2 :2763319-2766734 | MR150 | M36C05 | NOTEST | 0       | 0       | 0           | 0         | 1       | 1         |
| gene2673 | gene2673 | icaB      | gi 57650036 ref NC_002951.2 :2763319-2766734 | MR150 | M36C05 | OK     | 0.22551 | 1.78681 | 2.98614     | -0.941419 | 0.34649 | 0.999883  |
| gene2674 | gene2674 | icaC      | gi 57650036 ref NC_002951.2 :2763319-2766734 | MR150 | M36C05 | OK     | 5.03264 | 3.49435 | -0.526291   | 0.604735  | 0.54536 | 0.999883  |
| gene2675 | gene2675 | SACOL2693 | gi 57650036 ref NC_002951.2 :2767031-2767097 | MR150 | M36C05 | OK     | 0       | #####   | 1.79769e+30 | 1.79769e+ | 0.03514 | 0.35865   |
| gene2676 | gene2676 | geh       | gi 57650036 ref NC_002951.2 :2767124-2769167 | MR150 | M36C05 | OK     | 70.6439 | 232.372 | 1.7178      | -1.89824  | 0.05766 | 0.48127   |
| gene2677 | gene2677 | SACOL2695 | gi 57650036 ref NC_002951.2 :2769887-2770100 | MR150 | M36C05 | NOTEST | 0       | 0       | 0           | 0         | 1       | 1         |
| gene2678 | gene2678 | hisI      | gi 57650036 ref NC_002951.2 :2770259-2774476 | MR150 | M36C05 | OK     | 2.12107 | 4.5883  | 1.11317     | -0.583456 | 0.55959 | 0.999883  |
| gene2679 | gene2679 | hisF      | gi 57650036 ref NC_002951.2 :2770259-2774476 | MR150 | M36C05 | OK     | 3.56048 | 5.92082 | 0.733727    | -0.534241 | 0.59318 | 0.999883  |
| gene268  | gene268  | SACOL0278 | gi 57650036 ref NC_002951.2 :320167-321473   | MR150 | M36C05 | NOTEST | 0       | 0       | 0           | 0         | 1       | 1         |
| gene2680 | gene2680 | hisA      | gi 57650036 ref NC_002951.2 :2770259-2774476 | MR150 | M36C05 | OK     | 4.54721 | 7.21052 | 0.665121    | -0.5142   | 0.60711 | 0.999883  |
| gene2681 | gene2681 | hisH      | gi 57650036 ref NC_002951.2 :2770259-2774476 | MR150 | M36C05 | OK     | 2.01911 | 4.36944 | 1.11373     | -0.532528 | 0.59436 | 0.999883  |
| gene2682 | gene2682 | hisB      | gi 57650036 ref NC_002951.2 :2770259-2774476 | MR150 | M36C05 | OK     | 2.42293 | 1.74778 | -0.471231   | 0.181949  | 0.85562 | 0.999883  |
| gene2683 | gene2683 | SACOL2701 | gi 57650036 ref NC_002951.2 :2770259-2774476 | MR150 | M36C05 | OK     | 1.69312 | 2.1675  | 0.35635     | -0.201609 | 0.84022 | 0.999883  |
| gene2684 | gene2684 | hisD      | gi 57650036 ref NC_002951.2 :2774491-2776349 | MR150 | M36C05 | OK     | 2.02847 | 1.35589 | -0.581145   | 0.684251  | 0.49382 | 0.999883  |
| gene2685 | gene2685 | hisG      | gi 57650036 ref NC_002951.2 :2774491-2776349 | MR150 | M36C05 | OK     | 1.10649 | 1.32992 | 0.265345    | -0.163894 | 0.86982 | 0.999883  |
| gene2686 | gene2686 | hisZ      | gi 57650036 ref NC_002951.2 :2776366-2777185 | MR150 | M36C05 | OK     | 1.73146 | 2.31665 | 0.420051    | -0.517632 | 0.60472 | 0.999883  |
| gene2687 | gene2687 | SACOL2705 | gi 57650036 ref NC_002951.2 :2777489-2778614 | MR150 | M36C05 | OK     | 18.0459 | 13.4693 | -0.421994   | 0.614359  | 0.53898 | 0.999883  |
| gene2688 | gene2688 | SACOL2706 | gi 57650036 ref NC_002951.2 :2778731-2779229 | MR150 | M36C05 | OK     | 1.02659 | 2.9643  | 1.52984     | -1.4867   | 0.13709 | 0.732748  |
| gene2689 | gene2689 | SACOL2707 | gi 57650036 ref NC_002951.2 :2779275-2781818 | MR150 | M36C05 | OK     | 1.44902 | 4.69751 | 1.69682     | -1.48199  | 0.13834 | 0.733494  |
| gene269  | gene269  | SACOL0279 | gi 57650036 ref NC_002951.2 :320167-321473   | MR150 | M36C05 | NOTEST | 0       | 0       | 0           | 0         | 1       | 1         |
| gene2690 | gene2690 | SACOL2708 | gi 57650036 ref NC_002951.2 :2779275-2781818 | MR150 | M36C05 | OK     | 0.40493 | 4.73506 | 3.54763     | -3.36955  | 0.00075 | 0.027943  |
| gene2691 | gene2691 | SACOL2709 | gi 57650036 ref NC_002951.2 :2781870-2782425 | MR150 | M36C05 | OK     | 1.72431 | 9.64162 | 2.48326     | -2.97019  | 0.00298 | 0.0769228 |
| gene2692 | gene2692 | SACOL2710 | gi 57650036 ref NC_002951.2 :2782453-2783302 | MR150 | M36C05 | OK     | 3.06702 | 13.0866 | 2.09318     | -2.92345  | 0.00346 | 0.0849254 |
| gene2693 | gene2693 | SACOL2711 | gi 57650036 ref NC_002951.2 :2783681-2784197 | MR150 | M36C05 | OK     | 217.867 | 582.861 | 1.4197      | -1.69599  | 0.08989 | 0.602333  |
| gene2694 | gene2694 | drp35     | gi 57650036 ref NC_002951.2 :2784345-2785317 | MR150 | M36C05 | OK     | 4.56214 | 8.28512 | 0.860813    | -1.2397   | 0.21509 | 0.89416   |
| gene2695 | gene2695 | SACOL2713 | gi 57650036 ref NC_002951.2 :2785560-2786517 | MR150 | M36C05 | OK     | 43.2884 | 12.8199 | -1.7556     | 2.49012   | 0.01277 | 0.19415   |
| gene2696 | gene2696 | pcp       | gi 57650036 ref NC_002951.2 :2786668-2787307 | MR150 | M36C05 | OK     | 5.23026 | 6.7882  | 0.376146    | -0.51784  | 0.60457 | 0.999883  |
| gene2697 | gene2697 | SACOL2715 | gi 57650036 ref NC_002951.2 :2787425-2788521 | MR150 | M36C05 | NOTEST | 0       | 0       | 0           | 0         | 1       | 1         |



|          |          |           |                                              |       |        |        |         |         |              |              |          |           |
|----------|----------|-----------|----------------------------------------------|-------|--------|--------|---------|---------|--------------|--------------|----------|-----------|
| gene2698 | gene2698 | SACOL2716 | gi 57650036 ref NC_002951.2 :2787425-2788521 | MR150 | M36C05 | NOTEST | 0       | 0       | 0            | 0            | 1        | 1         |
| gene2699 | gene2699 | SACOL2717 | gi 57650036 ref NC_002951.2 :2788687-2789152 | MR150 | M36C05 | OK     | 10.3831 | 18.7434 | 0.852141     | -1.20715     | 0.22737  | 0.898537  |
| gene27   | gene27   | SACOL0026 | gi 57650036 ref NC_002951.2 :34371-35667     | MR150 | M36C05 | NOTEST | 0       | 0       | 0            | 0            | 1        | 1         |
| gene270  | gene270  | SACOL0280 | gi 57650036 ref NC_002951.2 :320167-321473   | MR150 | M36C05 | NOTEST | 0       | 0       | 0            | 0            | 1        | 1         |
| gene2700 | gene2700 | SACOL2718 | gi 57650036 ref NC_002951.2 :2789389-2790808 | MR150 | M36C05 | OK     | 8.92052 | 7.86731 | -0.181258    | 0.266286     | 0.79002  | 0.999883  |
| gene2701 | gene2701 | rarD      | gi 57650036 ref NC_002951.2 :2791220-2792129 | MR150 | M36C05 | OK     | 13.6061 | 34.8444 | 1.35667      | -1.95298     | 0.05082  | 0.443669  |
| gene2702 | gene2702 | SACOL2720 | gi 57650036 ref NC_002951.2 :2792353-2792929 | MR150 | M36C05 | OK     | 0.81408 | 15.2685 | 4.22924      | -4.41813     | 9.96E-06 | 0.0008282 |
| gene2703 | gene2703 | nixA      | gi 57650036 ref NC_002951.2 :2793057-2794110 | MR150 | M36C05 | OK     | 5.20627 | 13.8317 | 1.40966      | -2.04832     | 0.04053  | 0.392646  |
| gene2704 | gene2704 | SACOL2722 | gi 57650036 ref NC_002951.2 :2794352-2795147 | MR150 | M36C05 | NOTEST | 0.77197 | 0.92701 | 0.264048     | -0.264385    | 0.79148  | 1         |
| gene2705 | gene2705 | SACOL2723 | gi 57650036 ref NC_002951.2 :2795280-2795793 | MR150 | M36C05 | OK     | 3.42143 | 85.0216 | 4.63516      | -5.97551     | 2.29E-09 | 6.92E-07  |
| gene2706 | gene2706 | SACOL2724 | gi 57650036 ref NC_002951.2 :2796075-2798704 | MR150 | M36C05 | OK     | 2.19106 | 3.55249 | 0.697201     | -0.604114    | 0.54577  | 0.999883  |
| gene2707 | gene2707 | SACOL2725 | gi 57650036 ref NC_002951.2 :2796075-2798704 | MR150 | M36C05 | OK     | 1.36677 | 1.83576 | 0.425607     | -0.483041    | 0.62907  | 0.999883  |
| gene2708 | gene2708 | SACOL2726 | gi 57650036 ref NC_002951.2 :2798796-2798988 | MR150 | M36C05 | NOTEST | 0       | 0       | 0            | 0            | 1        | 1         |
| gene2709 | gene2709 | SACOL2727 | gi 57650036 ref NC_002951.2 :2798999-2799536 | MR150 | M36C05 | OK     | 4.54055 | 1.3106  | -1.79263     | 1.95585      | 0.05048  | 0.442304  |
| gene271  | gene271  | SACOL0281 | gi 57650036 ref NC_002951.2 :321482-323327   | MR150 | M36C05 | NOTEST | 0       | 0       | 0            | 0            | 1        | 1         |
| gene2710 | gene2710 | SACOL2728 | gi 57650036 ref NC_002951.2 :2799595-2800093 | MR150 | M36C05 | OK     | 6.67283 | 1.85269 | -1.84868     | 2.1266       | 0.03345  | 0.350737  |
| gene2711 | gene2711 | SACOL2729 | gi 57650036 ref NC_002951.2 :2800171-2800522 | MR150 | M36C05 | OK     | 6.94183 | 0       | -1.79769e+30 | -1.79769e+30 | 0.00717  | 0.136826  |
| gene2712 | gene2712 | SACOL2730 | gi 57650036 ref NC_002951.2 :2800550-2800742 | MR150 | M36C05 | NOTEST | 0       | 0       | 0            | 0            | 1        | 1         |
| gene2713 | gene2713 | SACOL2731 | gi 57650036 ref NC_002951.2 :2801134-2801335 | MR150 | M36C05 | OK     | 2168.5  | 754.558 | -1.523       | 2.03657      | 0.04169  | 0.397017  |
| gene2714 | gene2714 | SACOL2732 | gi 57650036 ref NC_002951.2 :2801461-2802031 | MR150 | M36C05 | OK     | 3.30904 | 9.25019 | 1.48307      | -1.94825     | 0.05138  | 0.446342  |
| gene2715 | gene2715 | SACOL2733 | gi 57650036 ref NC_002951.2 :2802290-2802671 | MR150 | M36C05 | OK     | 4.1856  | 9.67459 | 1.20877      | -1.45102     | 0.14678  | 0.743774  |
| gene2716 | gene2716 | SACOL2734 | gi 57650036 ref NC_002951.2 :2802753-2803107 | MR150 | M36C05 | OK     | 0       | 4.22146 | 1.79769e+30  | 1.79769e+30  | 0.0141   | 0.204943  |
| gene2717 | gene2717 | SACOL2735 | gi 57650036 ref NC_002951.2 :2803560-2804400 | MR150 | M36C05 | OK     | 56.2214 | 34.4697 | -0.705789    | 0.981125     | 0.32653  | 0.999883  |
| gene2718 | gene2718 | gidB      | gi 57650036 ref NC_002951.2 :2804442-2807039 | MR150 | M36C05 | OK     | 36.5067 | 30.7672 | -0.246772    | 0.154845     | 0.87694  | 0.999883  |
| gene2719 | gene2719 | gidA      | gi 57650036 ref NC_002951.2 :2804442-2807039 | MR150 | M36C05 | OK     | 33.0437 | 30.5413 | -0.113614    | 0.124703     | 0.90076  | 0.999883  |
| gene272  | gene272  | SACOL0282 | gi 57650036 ref NC_002951.2 :323337-323829   | MR150 | M36C05 | NOTEST | 0       | 0       | 0            | 0            | 1        | 1         |
| gene2720 | gene2720 | trmE      | gi 57650036 ref NC_002951.2 :2807105-2808485 | MR150 | M36C05 | OK     | 31.4098 | 26.7181 | -0.233398    | 0.318743     | 0.74992  | 0.999883  |
| gene2721 | gene2721 | rnpA      | gi 57650036 ref NC_002951.2 :2808623-2808971 | MR150 | M36C05 | OK     | 25.2507 | 16.7823 | -0.589383    | 0.824685     | 0.40955  | 0.999883  |
| gene2722 | gene2722 | rpmH      | gi 57650036 ref NC_002951.2 :2809097-2809235 | MR150 | M36C05 | OK     | 3760.41 | 1201.95 | -1.64551     | 2.37935      | 0.01734  | 0.238061  |
| gene273  | gene273  | SACOL0283 | gi 57650036 ref NC_002951.2 :324036-324720   | MR150 | M36C05 | NOTEST | 0       | 0       | 0            | 0            | 1        | 1         |
| gene274  | gene274  | SACOL0284 | gi 57650036 ref NC_002951.2 :324866-325478   | MR150 | M36C05 | NOTEST | 0       | 0       | 0            | 0            | 1        | 1         |
| gene275  | gene275  | SACOL0285 | gi 57650036 ref NC_002951.2 :325613-325832   | MR150 | M36C05 | OK     | 10.4974 | 25.0136 | 1.25268      | -1.34571     | 0.1784   | 0.821737  |
| gene276  | gene276  | SACOL0286 | gi 57650036 ref NC_002951.2 :325963-326464   | MR150 | M36C05 | NOTEST | 0.5082  | 0       | -1.79769e+30 | -1.79769e+30 | 0.10824  | 1         |

|         |         |           |                                            |       |        |        |         |         |             |             |         |           |
|---------|---------|-----------|--------------------------------------------|-------|--------|--------|---------|---------|-------------|-------------|---------|-----------|
| gene277 | gene277 | SACOL0287 | gi 57650036 ref NC_002951.2 :326474-326975 | MR150 | M36C05 | NOTEST | 0       | 0       | 0           | 0           | 1       | 1         |
| gene278 | gene278 | SACOL0288 | gi 57650036 ref NC_002951.2 :326985-327481 | MR150 | M36C05 | OK     | 3.1005  | 0.74608 | -2.0551     | 1.78998     | 0.07346 | 0.532143  |
| gene279 | gene279 | SACOL0289 | gi 57650036 ref NC_002951.2 :327491-327983 | MR150 | M36C05 | NOTEST | 0       | 0.37814 | 1.79769e+30 | 1.79769e+30 | 0.14732 | 1         |
| gene28  | gene28  | SACOL0027 | gi 57650036 ref NC_002951.2 :36081-36321   | MR150 | M36C05 | NOTEST | 0       | 0       | 0           | 0           | 1       | 1         |
| gene280 | gene280 | SACOL0290 | gi 57650036 ref NC_002951.2 :328192-328876 | MR150 | M36C05 | NOTEST | 0       | 0       | 0           | 0           | 1       | 1         |
| gene281 | gene281 | SACOL0291 | gi 57650036 ref NC_002951.2 :329461-329962 | MR150 | M36C05 | NOTEST | 0       | 0.36685 | 1.79769e+30 | 1.79769e+30 | 0.14732 | 1         |
| gene282 | gene282 | SACOL0292 | gi 57650036 ref NC_002951.2 :329973-330474 | MR150 | M36C05 | NOTEST | 0       | 0       | 0           | 0           | 1       | 1         |
| gene283 | gene283 | SACOL0293 | gi 57650036 ref NC_002951.2 :330484-330985 | MR150 | M36C05 | OK     | 1.01639 | 0.7337  | -0.470207   | 0.368424    | 0.71256 | 0.999883  |
| gene284 | gene284 | SACOL0294 | gi 57650036 ref NC_002951.2 :330995-331496 | MR150 | M36C05 | OK     | 1.01639 | 1.10054 | 0.114755    | -0.100014   | 0.92033 | 0.999883  |
| gene285 | gene285 | SACOL0295 | gi 57650036 ref NC_002951.2 :331506-332007 | MR150 | M36C05 | NOTEST | 0       | 0       | 0           | 0           | 1       | 1         |
| gene286 | gene286 | SACOL0296 | gi 57650036 ref NC_002951.2 :332017-332518 | MR150 | M36C05 | NOTEST | 0       | 0.7337  | 1.79769e+30 | 1.79769e+30 | 0.06916 | 1         |
| gene287 | gene287 | SACOL0297 | gi 57650036 ref NC_002951.2 :332528-333017 | MR150 | M36C05 | NOTEST | 0       | 0       | 0           | 0           | 1       | 1         |
| gene288 | gene288 | SACOL0299 | gi 57650036 ref NC_002951.2 :333639-334014 | MR150 | M36C05 | OK     | 5.18601 | 6.24339 | 0.267705    | -0.316829   | 0.75137 | 0.999883  |
| gene289 | gene289 | SACOL0300 | gi 57650036 ref NC_002951.2 :334166-334565 | MR150 | M36C05 | OK     | 30.572  | 17.6655 | -0.791277   | 1.13889     | 0.25475 | 0.932724  |
| gene29  | gene29  | SACOL0028 | gi 57650036 ref NC_002951.2 :36352-37027   | MR150 | M36C05 | OK     | 186.277 | 211.881 | 0.185806    | -0.226983   | 0.82044 | 0.999883  |
| gene290 | gene290 | SACOL0301 | gi 57650036 ref NC_002951.2 :334780-335626 | MR150 | M36C05 | OK     | 2.84423 | 18.9528 | 2.7363      | -3.79093    | 0.00015 | 0.0081058 |
| gene291 | gene291 | brnQ2     | gi 57650036 ref NC_002951.2 :335841-337149 | MR150 | M36C05 | OK     | 33.3119 | 17.4116 | -0.935986   | 1.305       | 0.19189 | 0.852075  |
| gene292 | gene292 | SACOL0303 | gi 57650036 ref NC_002951.2 :337732-338623 | MR150 | M36C05 | OK     | 6.64777 | 21.0688 | 1.66417     | -2.41301    | 0.01582 | 0.222762  |
| gene293 | gene293 | SACOL0305 | gi 57650036 ref NC_002951.2 :338871-339921 | MR150 | M36C05 | OK     | 29.1859 | 173.313 | 2.57004     | -3.25515    | 0.00113 | 0.0376232 |
| gene294 | gene294 | SACOL0306 | gi 57650036 ref NC_002951.2 :339933-340611 | MR150 | M36C05 | OK     | 51.8817 | 260.877 | 2.33007     | -2.98458    | 0.00284 | 0.0744582 |
| gene295 | gene295 | pfoR      | gi 57650036 ref NC_002951.2 :340818-341850 | MR150 | M36C05 | OK     | 131.232 | 127.498 | -0.041638   | 0.050064    | 0.96007 | 0.999883  |
| gene296 | gene296 | SACOL0308 | gi 57650036 ref NC_002951.2 :342192-344209 | MR150 | M36C05 | OK     | 2.1663  | 1.07979 | -1.00449    | 0.856558    | 0.39169 | 0.999883  |
| gene297 | gene297 | SACOL0309 | gi 57650036 ref NC_002951.2 :342192-344209 | MR150 | M36C05 | OK     | 2.32647 | 3.65589 | 0.652078    | -0.692346   | 0.48872 | 0.999883  |
| gene298 | gene298 | SACOL0310 | gi 57650036 ref NC_002951.2 :344219-345440 | MR150 | M36C05 | OK     | 2.84995 | 1.72768 | -0.722098   | 0.974673    | 0.32972 | 0.999883  |
| gene299 | gene299 | SACOL0311 | gi 57650036 ref NC_002951.2 :345544-347077 | MR150 | M36C05 | OK     | 5.05557 | 5.54025 | 0.132078    | -0.193789   | 0.84634 | 0.999883  |
| gene3   | gene3   | recF      | gi 57650036 ref NC_002951.2 :3696-5051     | MR150 | M36C05 | OK     | 217.383 | 188.273 | -0.207408   | 0.214723    | 0.82998 | 0.999883  |
| gene30  | gene30  | SACOL0029 | gi 57650036 ref NC_002951.2 :37284-37452   | MR150 | M36C05 | OK     | 72.0211 | 67.6104 | -0.0911751  | 0.105408    | 0.91605 | 0.999883  |
| gene300 | gene300 | nanA      | gi 57650036 ref NC_002951.2 :347116-347998 | MR150 | M36C05 | OK     | 4.4903  | 5.49853 | 0.292234    | -0.412696   | 0.67983 | 0.999883  |
| gene301 | gene301 | SACOL0313 | gi 57650036 ref NC_002951.2 :348155-349016 | MR150 | M36C05 | OK     | 6.94931 | 14.8511 | 1.09563     | -1.59588    | 0.11052 | 0.660511  |
| gene302 | gene302 | SACOL0314 | gi 57650036 ref NC_002951.2 :349293-350094 | MR150 | M36C05 | OK     | 25.7303 | 44.6023 | 0.793654    | -1.13161    | 0.2578  | 0.936588  |
| gene303 | gene303 | SACOL0315 | gi 57650036 ref NC_002951.2 :350233-350902 | MR150 | M36C05 | OK     | 10.1183 | 12.0005 | 0.246118    | -0.357322   | 0.72085 | 0.999883  |
| gene304 | gene304 | SACOL0316 | gi 57650036 ref NC_002951.2 :351028-352342 | MR150 | M36C05 | OK     | 1.09984 | 1.88022 | 0.773611    | -0.992891   | 0.32076 | 0.999883  |
| gene305 | gene305 | SACOL0317 | gi 57650036 ref NC_002951.2 :352759-354694 | MR150 | M36C05 | OK     | 4.85556 | 10.4175 | 1.1013      | -1.60389    | 0.10874 | 0.655235  |

|         |         |           |                                            |       |        |        |         |         |             |             |         |          |
|---------|---------|-----------|--------------------------------------------|-------|--------|--------|---------|---------|-------------|-------------|---------|----------|
| gene306 | gene306 | int       | gi 57650036 ref NC_002951.2 :354784-355990 | MR150 | M36C05 | OK     | 1.21787 | 1.75347 | 0.525856    | -0.667429   | 0.5045  | 0.999883 |
| gene307 | gene307 | SACOL0319 | gi 57650036 ref NC_002951.2 :356183-356897 | MR150 | M36C05 | OK     | 15.4879 | 17.3881 | 0.166966    | -0.245485   | 0.80608 | 0.999883 |
| gene308 | gene308 | SACOL0320 | gi 57650036 ref NC_002951.2 :356974-357202 | MR150 | M36C05 | OK     | 12.1744 | 15.2389 | 0.323902    | -0.35128    | 0.72538 | 0.999883 |
| gene309 | gene309 | SACOL0321 | gi 57650036 ref NC_002951.2 :357356-358076 | MR150 | M36C05 | NOTEST | 0       | 0       | 0           | 0           | 1       | 1        |
| gene31  | gene31  | SACOL0030 | gi 57650036 ref NC_002951.2 :37549-37780   | MR150 | M36C05 | NOTEST | 0       | 0       | 0           | 0           | 1       | 1        |
| gene310 | gene310 | SACOL0322 | gi 57650036 ref NC_002951.2 :358217-358436 | MR150 | M36C05 | NOTEST | 0       | 0       | 0           | 0           | 1       | 1        |
| gene311 | gene311 | SACOL0323 | gi 57650036 ref NC_002951.2 :358450-358759 | MR150 | M36C05 | NOTEST | 0       | 0       | 0           | 0           | 1       | 1        |
| gene312 | gene312 | SACOL0324 | gi 57650036 ref NC_002951.2 :358762-358915 | MR150 | M36C05 | NOTEST | 0       | 0       | 0           | 0           | 1       | 1        |
| gene313 | gene313 | SACOL0325 | gi 57650036 ref NC_002951.2 :358915-359707 | MR150 | M36C05 | NOTEST | 0       | 0       | 0           | 0           | 1       | 1        |
| gene314 | gene314 | SACOL0326 | gi 57650036 ref NC_002951.2 :359707-359932 | MR150 | M36C05 | NOTEST | 0       | 0       | 0           | 0           | 1       | 1        |
| gene315 | gene315 | SACOL0327 | gi 57650036 ref NC_002951.2 :359971-360551 | MR150 | M36C05 | NOTEST | 0       | 0       | 0           | 0           | 1       | 1        |
| gene316 | gene316 | SACOL0328 | gi 57650036 ref NC_002951.2 :359971-360551 | MR150 | M36C05 | NOTEST | 0       | 0       | 0           | 0           | 1       | 1        |
| gene317 | gene317 | SACOL0329 | gi 57650036 ref NC_002951.2 :360604-361172 | MR150 | M36C05 | NOTEST | 0       | 0       | 0           | 0           | 1       | 1        |
| gene318 | gene318 | SACOL0330 | gi 57650036 ref NC_002951.2 :360604-361172 | MR150 | M36C05 | NOTEST | 0       | 0       | 0           | 0           | 1       | 1        |
| gene319 | gene319 | SACOL0331 | gi 57650036 ref NC_002951.2 :361219-361640 | MR150 | M36C05 | NOTEST | 0       | 0       | 0           | 0           | 1       | 1        |
| gene32  | gene32  | SACOL0031 | gi 57650036 ref NC_002951.2 :38328-39072   | MR150 | M36C05 | OK     | 74.016  | 140.954 | 0.929314    | -1.20372    | 0.2287  | 0.898537 |
| gene320 | gene320 | SACOL0332 | gi 57650036 ref NC_002951.2 :361219-361640 | MR150 | M36C05 | NOTEST | 0       | 0       | 0           | 0           | 1       | 1        |
| gene321 | gene321 | SACOL0333 | gi 57650036 ref NC_002951.2 :361694-361958 | MR150 | M36C05 | OK     | 0       | 7.02445 | 1.79769e+30 | 1.79769e+30 | 0.01809 | 0.243354 |
| gene322 | gene322 | SACOL0334 | gi 57650036 ref NC_002951.2 :361970-362132 | MR150 | M36C05 | OK     | 0       | 10.5757 | 1.79769e+30 | 1.79769e+30 | 0.14732 | 0.743774 |
| gene323 | gene323 | SACOL0335 | gi 57650036 ref NC_002951.2 :362221-362539 | MR150 | M36C05 | NOTEST | 0       | 0.89032 | 1.79769e+30 | 1.79769e+30 | 0.14732 | 1        |
| gene324 | gene324 | SACOL0336 | gi 57650036 ref NC_002951.2 :362543-362804 | MR150 | M36C05 | OK     | 0       | 2.89837 | 1.79769e+30 | 1.79769e+30 | 0.06916 | 0.522414 |
| gene325 | gene325 | SACOL0337 | gi 57650036 ref NC_002951.2 :362813-364070 | MR150 | M36C05 | NOTEST | 0       | 0       | 0           | 0           | 1       | 1        |
| gene326 | gene326 | SACOL0338 | gi 57650036 ref NC_002951.2 :362813-364070 | MR150 | M36C05 | NOTEST | 0       | 0       | 0           | 0           | 1       | 1        |
| gene327 | gene327 | ssb1      | gi 57650036 ref NC_002951.2 :362813-364070 | MR150 | M36C05 | NOTEST | 0       | 0.50064 | 1.79769e+30 | 1.79769e+30 | 0.2187  | 1        |
| gene328 | gene328 | SACOL0340 | gi 57650036 ref NC_002951.2 :364083-367357 | MR150 | M36C05 | OK     | 20.0619 | 50.7237 | 1.3382      | -1.70797    | 0.08764 | 0.594442 |
| gene329 | gene329 | SACOL0341 | gi 57650036 ref NC_002951.2 :364083-367357 | MR150 | M36C05 | OK     | 0.76427 | 2.38613 | 1.64253     | -0.475255   | 0.63461 | 0.999883 |
| gene33  | gene33  | maoC      | gi 57650036 ref NC_002951.2 :39168-39597   | MR150 | M36C05 | OK     | 33.321  | 17.8081 | -0.903896   | 1.31135     | 0.18974 | 0.848649 |
| gene330 | gene330 | SACOL0342 | gi 57650036 ref NC_002951.2 :364083-367357 | MR150 | M36C05 | OK     | 2.87028 | 3.45578 | 0.267819    | -0.058083   | 0.95368 | 0.999883 |
| gene331 | gene331 | SACOL0343 | gi 57650036 ref NC_002951.2 :364083-367357 | MR150 | M36C05 | OK     | 1.1758  | 3.91468 | 1.73525     | -0.83193    | 0.40545 | 0.999883 |
| gene332 | gene332 | SACOL0344 | gi 57650036 ref NC_002951.2 :364083-367357 | MR150 | M36C05 | OK     | 0       | 7.88874 | 1.79769e+30 | 1.79769e+30 | 0.38714 | 0.999883 |
| gene333 | gene333 | SACOL0345 | gi 57650036 ref NC_002951.2 :367359-367581 | MR150 | M36C05 | OK     | 13.3382 | 50.0644 | 1.90822     | -2.24938    | 0.02449 | 0.296972 |
| gene334 | gene334 | SACOL0346 | gi 57650036 ref NC_002951.2 :367590-368417 | MR150 | M36C05 | NOTEST | 0       | 0       | 0           | 0           | 1       | 1        |
| gene335 | gene335 | SACOL0347 | gi 57650036 ref NC_002951.2 :367590-368417 | MR150 | M36C05 | OK     | 0.7426  | 3.21821 | 2.1156      | -1.40622    | 0.15966 | 0.779659 |

|         |         |           |                                            |       |        |        |         |         |              |              |         |           |
|---------|---------|-----------|--------------------------------------------|-------|--------|--------|---------|---------|--------------|--------------|---------|-----------|
| gene336 | gene336 | SACOL0348 | gi 57650036 ref NC_002951.2 :368421-368607 | MR150 | M36C05 | NOTEST | 0       | 0       | 0            | 0            | 1       | 1         |
| gene337 | gene337 | SACOL0349 | gi 57650036 ref NC_002951.2 :368607-368865 | MR150 | M36C05 | NOTEST | 0       | 0       | 0            | 0            | 1       | 1         |
| gene338 | gene338 | SACOL0350 | gi 57650036 ref NC_002951.2 :368876-369233 | MR150 | M36C05 | NOTEST | 0       | 0.69116 | 1.79769e+30  | 1.79769e+30  | 0.14732 | 1         |
| gene339 | gene339 | SACOL0351 | gi 57650036 ref NC_002951.2 :369236-369479 | MR150 | M36C05 | OK     | 2.48354 | 3.55812 | 0.518715     | -0.341278    | 0.73289 | 0.999883  |
| gene34  | gene34  | mecA      | gi 57650036 ref NC_002951.2 :39642-41649   | MR150 | M36C05 | OK     | 510.8   | 630.628 | 0.304032     | -0.310873    | 0.7559  | 0.999883  |
| gene340 | gene340 | SACOL0352 | gi 57650036 ref NC_002951.2 :369492-369699 | MR150 | M36C05 | OK     | 4.33328 | 0       | -1.79769e+30 | -1.79769e+30 | 0.10824 | 0.653986  |
| gene341 | gene341 | SACOL0353 | gi 57650036 ref NC_002951.2 :369701-370981 | MR150 | M36C05 | OK     | 0       | 1.63231 | 1.79769e+30  | 1.79769e+30  | 0.2965  | 0.9791    |
| gene342 | gene342 | SACOL0354 | gi 57650036 ref NC_002951.2 :369701-370981 | MR150 | M36C05 | OK     | 14.1404 | 51.0765 | 1.85284      | -2.19241     | 0.02835 | 0.319082  |
| gene343 | gene343 | SACOL0355 | gi 57650036 ref NC_002951.2 :369701-370981 | MR150 | M36C05 | OK     | 10.5426 | 13.3124 | 0.336528     | -0.22446     | 0.8224  | 0.999883  |
| gene344 | gene344 | SACOL0356 | gi 57650036 ref NC_002951.2 :369701-370981 | MR150 | M36C05 | OK     | 2.68362 | 9.60596 | 1.83975      | -0.567122    | 0.57063 | 0.999883  |
| gene345 | gene345 | dut       | gi 57650036 ref NC_002951.2 :370985-371528 | MR150 | M36C05 | OK     | 13.83   | 27.6846 | 1.00128      | -1.45997     | 0.1443  | 0.743774  |
| gene346 | gene346 | SACOL0358 | gi 57650036 ref NC_002951.2 :371564-372307 | MR150 | M36C05 | OK     | 17.3331 | 34.041  | 0.973741     | -0.889654    | 0.37365 | 0.999883  |
| gene347 | gene347 | SACOL0359 | gi 57650036 ref NC_002951.2 :371564-372307 | MR150 | M36C05 | NOTEST | 0       | 0       | 0            | 0            | 1       | 1         |
| gene348 | gene348 | SACOL0360 | gi 57650036 ref NC_002951.2 :371564-372307 | MR150 | M36C05 | OK     | 13.7972 | 39.3993 | 1.5138       | -1.27067     | 0.20385 | 0.875882  |
| gene349 | gene349 | SACOL0361 | gi 57650036 ref NC_002951.2 :371564-372307 | MR150 | M36C05 | OK     | 0       | 15.7499 | 1.79769e+30  | 1.79769e+30  | 0.29145 | 0.975616  |
| gene35  | gene35  | mecR1     | gi 57650036 ref NC_002951.2 :41748-44481   | MR150 | M36C05 | OK     | 150.796 | 109.295 | -0.464372    | 0.562035     | 0.57409 | 0.999883  |
| gene350 | gene350 | SACOL0362 | gi 57650036 ref NC_002951.2 :372374-372882 | MR150 | M36C05 | OK     | 0       | 3.49332 | 1.79769e+30  | 1.79769e+30  | 0.2187  | 0.89416   |
| gene351 | gene351 | SACOL0363 | gi 57650036 ref NC_002951.2 :372374-372882 | MR150 | M36C05 | OK     | 2.97507 | 3.58203 | 0.267855     | -0.250117    | 0.8025  | 0.999883  |
| gene352 | gene352 | SACOL0364 | gi 57650036 ref NC_002951.2 :372894-373332 | MR150 | M36C05 | OK     | 1.28318 | 1.85338 | 0.530438     | -0.480846    | 0.63063 | 0.999883  |
| gene353 | gene353 | SACOL0365 | gi 57650036 ref NC_002951.2 :373488-373803 | MR150 | M36C05 | NOTEST | 0       | 0.90974 | 1.79769e+30  | 1.79769e+30  | 0.14732 | 1         |
| gene354 | gene354 | SACOL0366 | gi 57650036 ref NC_002951.2 :373931-375918 | MR150 | M36C05 | OK     | 2.69701 | 14.5904 | 2.43558      | -1.20699     | 0.22744 | 0.898537  |
| gene355 | gene355 | SACOL0367 | gi 57650036 ref NC_002951.2 :373931-375918 | MR150 | M36C05 | OK     | 1.9505  | 5.54048 | 1.50617      | -2.01338     | 0.04407 | 0.409293  |
| gene356 | gene356 | SACOL0368 | gi 57650036 ref NC_002951.2 :375922-377918 | MR150 | M36C05 | OK     | 13.7082 | 28.7553 | 1.06879      | -1.40279     | 0.16068 | 0.783053  |
| gene357 | gene357 | SACOL0369 | gi 57650036 ref NC_002951.2 :375922-377918 | MR150 | M36C05 | OK     | 4.53442 | 6.15026 | 0.43973      | -0.217903    | 0.82751 | 0.999883  |
| gene358 | gene358 | SACOL0370 | gi 57650036 ref NC_002951.2 :377929-379093 | MR150 | M36C05 | OK     | 2.22408 | 3.8886  | 0.806041     | -1.11515     | 0.26479 | 0.94723   |
| gene359 | gene359 | SACOL0371 | gi 57650036 ref NC_002951.2 :379161-379440 | MR150 | M36C05 | OK     | 0       | 1.21621 | 1.79769e+30  | 1.79769e+30  | 0.14732 | 0.743774  |
| gene36  | gene36  | SACOL0035 | gi 57650036 ref NC_002951.2 :41748-44481   | MR150 | M36C05 | NOTEST | 0       | 0       | 0            | 0            | 1       | 1         |
| gene360 | gene360 | SACOL0372 | gi 57650036 ref NC_002951.2 :379451-380182 | MR150 | M36C05 | OK     | 1.11165 | 0.80307 | -0.469106    | 0.189513     | 0.84969 | 0.999883  |
| gene361 | gene361 | SACOL0373 | gi 57650036 ref NC_002951.2 :379451-380182 | MR150 | M36C05 | OK     | 2.2599  | 1.63231 | -0.46935     | 0.388342     | 0.69776 | 0.999883  |
| gene362 | gene362 | SACOL0374 | gi 57650036 ref NC_002951.2 :380182-380578 | MR150 | M36C05 | OK     | 3.10241 | 0.56021 | -2.46935     | 1.61289      | 0.10677 | 0.653986  |
| gene363 | gene363 | SACOL0375 | gi 57650036 ref NC_002951.2 :380612-381254 | MR150 | M36C05 | OK     | 0.34632 | 5.99292 | 4.11308      | -3.22633     | 0.00125 | 0.0405107 |
| gene364 | gene364 | SACOL0376 | gi 57650036 ref NC_002951.2 :381345-381801 | MR150 | M36C05 | OK     | 6.56651 | 12.9321 | 0.977752     | -1.32214     | 0.18612 | 0.840269  |
| gene365 | gene365 | SACOL0377 | gi 57650036 ref NC_002951.2 :381858-382209 | MR150 | M36C05 | NOTEST | 0       | 0       | 0            | 0            | 1       | 1         |

|         |         |           |                                            |       |        |        |         |         |             |             |         |           |
|---------|---------|-----------|--------------------------------------------|-------|--------|--------|---------|---------|-------------|-------------|---------|-----------|
| gene366 | gene366 | SACOL0378 | gi 57650036 ref NC_002951.2 :382250-382409 | MR150 | M36C05 | OK     | 0       | 11.9713 | 1.79769e+30 | 1.79769e+30 | 0.14732 | 0.743774  |
| gene367 | gene367 | SACOL0379 | gi 57650036 ref NC_002951.2 :382422-389447 | MR150 | M36C05 | OK     | 0.8169  | 2.97412 | 1.86423     | -2.6538     | 0.00796 | 0.14471   |
| gene368 | gene368 | SACOL0380 | gi 57650036 ref NC_002951.2 :382422-389447 | MR150 | M36C05 | OK     | 0       | 1.58842 | 1.79769e+30 | 1.79769e+30 | 0.25061 | 0.925525  |
| gene369 | gene369 | SACOL0381 | gi 57650036 ref NC_002951.2 :389455-391329 | MR150 | M36C05 | OK     | 0.88533 | 1.27426 | 0.525371    | -0.649847   | 0.51579 | 0.999883  |
| gene37  | gene37  | SACOL0036 | gi 57650036 ref NC_002951.2 :41748-44481   | MR150 | M36C05 | NOTEST | 0       | 0       | 0           | 0           | 1       | 1         |
| gene370 | gene370 | SACOL0382 | gi 57650036 ref NC_002951.2 :389455-391329 | MR150 | M36C05 | OK     | 0       | 1.09596 | 1.79769e+30 | 1.79769e+30 | 0.26301 | 0.945085  |
| gene371 | gene371 | SACOL0383 | gi 57650036 ref NC_002951.2 :391344-395267 | MR150 | M36C05 | OK     | 0.35808 | 1.86797 | 2.38311     | -2.49709    | 0.01252 | 0.192397  |
| gene372 | gene372 | SACOL0384 | gi 57650036 ref NC_002951.2 :391344-395267 | MR150 | M36C05 | NOTEST | 0.24177 | 0.348   | 0.52549     | -0.281088   | 0.77864 | 1         |
| gene373 | gene373 | SACOL0385 | gi 57650036 ref NC_002951.2 :391344-395267 | MR150 | M36C05 | NOTEST | 0.79917 | 0.57723 | -0.469345   | 0.139598    | 0.88898 | 1         |
| gene374 | gene374 | SACOL0386 | gi 57650036 ref NC_002951.2 :391344-395267 | MR150 | M36C05 | OK     | 0       | 9.41888 | 1.79769e+30 | 1.79769e+30 | 0.31165 | 0.993813  |
| gene375 | gene375 | SACOL0387 | gi 57650036 ref NC_002951.2 :395312-395612 | MR150 | M36C05 | OK     | 0       | 2.03801 | 1.79769e+30 | 1.79769e+30 | 0.06916 | 0.522414  |
| gene376 | gene376 | SACOL0388 | gi 57650036 ref NC_002951.2 :395747-396050 | MR150 | M36C05 | NOTEST | 0       | 0       | 0           | 0           | 1       | 1         |
| gene377 | gene377 | SACOL0389 | gi 57650036 ref NC_002951.2 :396061-397516 | MR150 | M36C05 | OK     | 0.48815 | 1.22966 | 1.33286     | -1.5363     | 0.12446 | 0.699335  |
| gene378 | gene378 | SACOL0390 | gi 57650036 ref NC_002951.2 :398285-398408 | MR150 | M36C05 | NOTEST | 0       | 0       | 0           | 0           | 1       | 1         |
| gene379 | gene379 | SACOL0391 | gi 57650036 ref NC_002951.2 :398649-399477 | MR150 | M36C05 | OK     | 1.95047 | 6.85021 | 1.81233     | -2.39792    | 0.01649 | 0.230359  |
| gene38  | gene38  | SACOL0037 | gi 57650036 ref NC_002951.2 :44616-45123   | MR150 | M36C05 | NOTEST | 0       | 0       | 0           | 0           | 1       | 1         |
| gene380 | gene380 | SACOL0392 | gi 57650036 ref NC_002951.2 :399549-400749 | MR150 | M36C05 | OK     | 3.21607 | 4.96124 | 0.625402    | -0.89278    | 0.37198 | 0.999883  |
| gene381 | gene381 | SACOL0393 | gi 57650036 ref NC_002951.2 :400844-400937 | MR150 | M36C05 | NOTEST | 0       | 0       | 0           | 0           | 1       | 1         |
| gene382 | gene382 | SACOL0394 | gi 57650036 ref NC_002951.2 :401050-402052 | MR150 | M36C05 | OK     | 7.06469 | 7.28738 | 0.0447746   | -0.065318   | 0.94792 | 0.999883  |
| gene383 | gene383 | SACOL0395 | gi 57650036 ref NC_002951.2 :402085-402418 | MR150 | M36C05 | OK     | 3.33494 | 9.63679 | 1.53089     | -1.66689    | 0.09554 | 0.621457  |
| gene384 | gene384 | SACOL0396 | gi 57650036 ref NC_002951.2 :402418-405153 | MR150 | M36C05 | OK     | 6.87839 | 6.24066 | -0.140372   | 0.119892    | 0.90457 | 0.999883  |
| gene385 | gene385 | SACOL0397 | gi 57650036 ref NC_002951.2 :402418-405153 | MR150 | M36C05 | OK     | 8.63263 | 3.70075 | -1.22198    | 1.08737     | 0.27687 | 0.962868  |
| gene386 | gene386 | SACOL0398 | gi 57650036 ref NC_002951.2 :402418-405153 | MR150 | M36C05 | OK     | 5.02383 | 2.54573 | -0.980709   | 0.73289     | 0.46363 | 0.999883  |
| gene387 | gene387 | SACOL0399 | gi 57650036 ref NC_002951.2 :405467-406493 | MR150 | M36C05 | OK     | 15.573  | 11.6144 | -0.423131   | 0.620419    | 0.53498 | 0.999883  |
| gene388 | gene388 | ulaA      | gi 57650036 ref NC_002951.2 :406585-407932 | MR150 | M36C05 | OK     | 4.40634 | 3.36383 | -0.389474   | 0.560429    | 0.57519 | 0.999883  |
| gene389 | gene389 | SACOL0401 | gi 57650036 ref NC_002951.2 :407946-408231 | MR150 | M36C05 | OK     | 1.6031  | 1.15323 | -0.475185   | 0.263273    | 0.79234 | 0.999883  |
| gene39  | gene39  | SACOL0038 | gi 57650036 ref NC_002951.2 :45137-45449   | MR150 | M36C05 | NOTEST | 0       | 0       | 0           | 0           | 1       | 1         |
| gene390 | gene390 | SACOL0402 | gi 57650036 ref NC_002951.2 :408232-408676 | MR150 | M36C05 | OK     | 0.62601 | 3.61662 | 2.53039     | -1.91819    | 0.05509 | 0.465171  |
| gene391 | gene391 | SACOL0403 | gi 57650036 ref NC_002951.2 :408680-410636 | MR150 | M36C05 | OK     | 2.79127 | 2.7615  | -0.0154708  | 0.022405    | 0.98213 | 0.999883  |
| gene392 | gene392 | SACOL0404 | gi 57650036 ref NC_002951.2 :410847-411267 | MR150 | M36C05 | OK     | 38.8175 | 9.01146 | -2.10687    | 2.94164     | 0.00326 | 0.0821387 |
| gene393 | gene393 | SACOL0405 | gi 57650036 ref NC_002951.2 :411373-412729 | MR150 | M36C05 | OK     | 1.72232 | 1.43041 | -0.267924   | 0.352218    | 0.72468 | 0.999883  |
| gene394 | gene394 | SACOL0406 | gi 57650036 ref NC_002951.2 :412832-413273 | MR150 | M36C05 | OK     | 12.6741 | 3.20351 | -1.98416    | 2.44926     | 0.01431 | 0.207193  |
| gene395 | gene395 | glpT      | gi 57650036 ref NC_002951.2 :413355-414714 | MR150 | M36C05 | OK     | 53.3859 | 12.6501 | -2.07731    | 2.82939     | 0.00466 | 0.101483  |

|         |         |           |                                            |       |        |        |         |         |           |           |         |           |
|---------|---------|-----------|--------------------------------------------|-------|--------|--------|---------|---------|-----------|-----------|---------|-----------|
| gene396 | gene396 | SACOL0408 | gi 57650036 ref NC_002951.2 :415021-415882 | MR150 | M36C05 | OK     | 82.6968 | 174.375 | 1.07629   | -1.33844  | 0.18076 | 0.828449  |
| gene397 | gene397 | SACOL0409 | gi 57650036 ref NC_002951.2 :415961-417023 | MR150 | M36C05 | OK     | 67.1529 | 133.162 | 0.987664  | -1.2251   | 0.22054 | 0.89416   |
| gene398 | gene398 | SACOL0410 | gi 57650036 ref NC_002951.2 :417036-417603 | MR150 | M36C05 | OK     | 103.834 | 149.816 | 0.528912  | -0.700763 | 0.48345 | 0.999883  |
| gene399 | gene399 | SACOL0411 | gi 57650036 ref NC_002951.2 :417662-418658 | MR150 | M36C05 | OK     | 16.352  | 13.9921 | -0.224855 | 0.329327  | 0.74191 | 0.999883  |
| gene4   | gene4   | gyrB      | gi 57650036 ref NC_002951.2 :5060-6995     | MR150 | M36C05 | OK     | 132.336 | 64.4107 | -1.03883  | 1.19399   | 0.23248 | 0.902162  |
| gene40  | gene40  | SACOL0039 | gi 57650036 ref NC_002951.2 :45450-45886   | MR150 | M36C05 | NOTEST | 0       | 0       | 0         | 0         | 1       | 1         |
| gene400 | gene400 | SACOL0412 | gi 57650036 ref NC_002951.2 :418755-419052 | MR150 | M36C05 | OK     | 1.44852 | 4.17434 | 1.52697   | -1.1083   | 0.26773 | 0.951188  |
| gene401 | gene401 | SACOL0413 | gi 57650036 ref NC_002951.2 :419131-419677 | MR150 | M36C05 | OK     | 20.3444 | 32.5502 | 0.678039  | -0.994853 | 0.31981 | 0.999883  |
| gene402 | gene402 | SACOL0414 | gi 57650036 ref NC_002951.2 :419944-423718 | MR150 | M36C05 | OK     | 2.80517 | 1.17878 | -1.2508   | 0.7869    | 0.43134 | 0.999883  |
| gene403 | gene403 | SACOL0415 | gi 57650036 ref NC_002951.2 :419944-423718 | MR150 | M36C05 | OK     | 1.63556 | 2.56886 | 0.651345  | -0.549417 | 0.58272 | 0.999883  |
| gene404 | gene404 | SACOL0416 | gi 57650036 ref NC_002951.2 :419944-423718 | MR150 | M36C05 | OK     | 2.02466 | 1.38409 | -0.54874  | 0.517781  | 0.60461 | 0.999883  |
| gene405 | gene405 | SACOL0417 | gi 57650036 ref NC_002951.2 :423809-424466 | MR150 | M36C05 | OK     | 8.709   | 20.7685 | 1.25381   | -1.81812  | 0.06905 | 0.522414  |
| gene406 | gene406 | SACOL0418 | gi 57650036 ref NC_002951.2 :424527-424743 | MR150 | M36C05 | OK     | 18.3956 | 36.8141 | 1.0009    | -1.19089  | 0.2337  | 0.902568  |
| gene407 | gene407 | SACOL0419 | gi 57650036 ref NC_002951.2 :424851-425241 | MR150 | M36C05 | OK     | 14.385  | 51.3738 | 1.83646   | -2.61896  | 0.00882 | 0.154274  |
| gene408 | gene408 | SACOL0420 | gi 57650036 ref NC_002951.2 :425481-426395 | MR150 | M36C05 | OK     | 27.5944 | 9.84983 | -1.4862   | 0.805683  | 0.42043 | 0.999883  |
| gene409 | gene409 | SACOL0421 | gi 57650036 ref NC_002951.2 :425481-426395 | MR150 | M36C05 | OK     | 2.97843 | 5.79605 | 0.960515  | -1.14004  | 0.25427 | 0.932194  |
| gene41  | gene41  | SACOL0040 | gi 57650036 ref NC_002951.2 :45450-45886   | MR150 | M36C05 | NOTEST | 0       | 0       | 0         | 0         | 1       | 1         |
| gene410 | gene410 | SACOL0422 | gi 57650036 ref NC_002951.2 :426419-427891 | MR150 | M36C05 | OK     | 5.00062 | 7.71946 | 0.626394  | -0.270989 | 0.7864  | 0.999883  |
| gene411 | gene411 | SACOL0424 | gi 57650036 ref NC_002951.2 :426419-427891 | MR150 | M36C05 | OK     | 76.5348 | 83.68   | 0.128768  | -0.164266 | 0.86952 | 0.999883  |
| gene412 | gene412 | SACOL0425 | gi 57650036 ref NC_002951.2 :428257-429391 | MR150 | M36C05 | OK     | 8.52611 | 6.61067 | -0.367092 | 0.538201  | 0.59044 | 0.999883  |
| gene413 | gene413 | SACOL0426 | gi 57650036 ref NC_002951.2 :429929-431111 | MR150 | M36C05 | OK     | 28.6952 | 11.7886 | -1.28342  | 1.83315   | 0.06678 | 0.51634   |
| gene414 | gene414 | SACOL0427 | gi 57650036 ref NC_002951.2 :431193-431946 | MR150 | M36C05 | OK     | 9.13613 | 10.1748 | 0.155342  | -0.225891 | 0.82129 | 0.999883  |
| gene415 | gene415 | metE      | gi 57650036 ref NC_002951.2 :431988-438284 | MR150 | M36C05 | OK     | 1.81183 | 5.43133 | 1.58385   | -1.48792  | 0.13677 | 0.732537  |
| gene416 | gene416 | SACOL0429 | gi 57650036 ref NC_002951.2 :431988-438284 | MR150 | M36C05 | OK     | 1.95892 | 3.96014 | 1.01549   | -0.802742 | 0.42212 | 0.999883  |
| gene417 | gene417 | SACOL0430 | gi 57650036 ref NC_002951.2 :431988-438284 | MR150 | M36C05 | OK     | 0.95615 | 3.78603 | 1.98537   | -0.991594 | 0.3214  | 0.999883  |
| gene418 | gene418 | SACOL0431 | gi 57650036 ref NC_002951.2 :431988-438284 | MR150 | M36C05 | OK     | 1.52462 | 3.5371  | 1.21411   | -0.653467 | 0.51346 | 0.999883  |
| gene419 | gene419 | SACOL0432 | gi 57650036 ref NC_002951.2 :438947-439793 | MR150 | M36C05 | OK     | 3.55529 | 4.43939 | 0.320395  | -0.440292 | 0.65973 | 0.999883  |
| gene42  | gene42  | ccrB      | gi 57650036 ref NC_002951.2 :46351-47976   | MR150 | M36C05 | NOTEST | 0       | 0       | 0         | 0         | 1       | 1         |
| gene420 | gene420 | SACOL0433 | gi 57650036 ref NC_002951.2 :439949-440831 | MR150 | M36C05 | OK     | 8.30705 | 6.63058 | -0.325202 | 0.47155   | 0.63725 | 0.999883  |
| gene421 | gene421 | SACOL0434 | gi 57650036 ref NC_002951.2 :440860-441064 | MR150 | M36C05 | OK     | 22.9953 | 26.2662 | 0.191868  | -0.21723  | 0.82803 | 0.999883  |
| gene422 | gene422 | SACOL0435 | gi 57650036 ref NC_002951.2 :441075-442173 | MR150 | M36C05 | OK     | 36.1532 | 21.6101 | -0.742419 | 1.04235   | 0.29725 | 0.9791    |
| gene423 | gene423 | SACOL0436 | gi 57650036 ref NC_002951.2 :442258-442450 | MR150 | M36C05 | OK     | 1621.28 | 539.309 | -1.58795  | 2.215     | 0.02676 | 0.309278  |
| gene424 | gene424 | rpsF      | gi 57650036 ref NC_002951.2 :442693-442990 | MR150 | M36C05 | OK     | 434.557 | 87.6612 | -2.30953  | 3.21423   | 0.00131 | 0.0416986 |

|         |         |           |                                            |       |        |        |         |         |              |              |          |          |
|---------|---------|-----------|--------------------------------------------|-------|--------|--------|---------|---------|--------------|--------------|----------|----------|
| gene425 | gene425 | ssb2      | gi 57650036 ref NC_002951.2 :443010-443514 | MR150 | M36C05 | OK     | 195.241 | 46.4933 | -2.07016     | 2.8285       | 0.00468  | 0.101483 |
| gene426 | gene426 | rpsR      | gi 57650036 ref NC_002951.2 :443565-443808 | MR150 | M36C05 | OK     | 764.931 | 149.441 | -2.35575     | 3.27388      | 0.00106  | 0.035874 |
| gene427 | gene427 | SACOL0440 | gi 57650036 ref NC_002951.2 :444073-445012 | MR150 | M36C05 | OK     | 2.27927 | 3.43236 | 0.590628     | -0.788907    | 0.43017  | 0.999883 |
| gene428 | gene428 | SACOL0441 | gi 57650036 ref NC_002951.2 :445050-445598 | MR150 | M36C05 | OK     | 2.19866 | 4.75926 | 1.11411      | -1.33184     | 0.18291  | 0.831493 |
| gene429 | gene429 | SACOL0442 | gi 57650036 ref NC_002951.2 :445957-446569 | MR150 | M36C05 | OK     | 3.71513 | 4.82263 | 0.376407     | -0.491615    | 0.62299  | 0.999883 |
| gene43  | gene43  | ccrA1     | gi 57650036 ref NC_002951.2 :47997-49347   | MR150 | M36C05 | NOTEST | 0       | 0       | 0            | 0            | 1        | 1        |
| gene430 | gene430 | SACOL0443 | gi 57650036 ref NC_002951.2 :446937-447306 | MR150 | M36C05 | OK     | 0       | 1.93572 | 1.79769e+30  | 1.79769e+30  | 0.03514  | 0.35865  |
| gene431 | gene431 | SACOL0444 | gi 57650036 ref NC_002951.2 :447486-448059 | MR150 | M36C05 | OK     | 13.9505 | 1250.85 | 6.48645      | -7.7585      | 8.66E-15 | 2.09E-11 |
| gene432 | gene432 | SACOL0445 | gi 57650036 ref NC_002951.2 :448196-448460 | MR150 | M36C05 | OK     | 201.611 | 132.06  | -0.610384    | 0.891359     | 0.37274  | 0.999883 |
| gene433 | gene433 | SACOL0446 | gi 57650036 ref NC_002951.2 :448759-449011 | MR150 | M36C05 | OK     | 428.14  | 15736.1 | 5.19985      | -6.05437     | 1.41E-09 | 4.64E-07 |
| gene434 | gene434 | SACOL0447 | gi 57650036 ref NC_002951.2 :449436-450018 | MR150 | M36C05 | OK     | 7.21178 | 8.67014 | 0.2657       | -0.371399    | 0.71034  | 0.999883 |
| gene435 | gene435 | SACOL0448 | gi 57650036 ref NC_002951.2 :450083-450467 | MR150 | M36C05 | OK     | 89.0031 | 65.4777 | -0.442852    | 0.645084     | 0.51887  | 0.999883 |
| gene436 | gene436 | SACOL0449 | gi 57650036 ref NC_002951.2 :450721-451348 | MR150 | M36C05 | OK     | 55.5635 | 47.8214 | -0.216481    | 0.308244     | 0.7579   | 0.999883 |
| gene437 | gene437 | SACOL0450 | gi 57650036 ref NC_002951.2 :451420-451714 | MR150 | M36C05 | OK     | 40.0873 | 55.5988 | 0.47191      | -0.682519    | 0.49491  | 0.999883 |
| gene438 | gene438 | ahpF      | gi 57650036 ref NC_002951.2 :451792-453316 | MR150 | M36C05 | OK     | 1312.16 | 1647.9  | 0.32869      | -0.343963    | 0.73087  | 0.999883 |
| gene439 | gene439 | ahpC      | gi 57650036 ref NC_002951.2 :453331-453901 | MR150 | M36C05 | OK     | 1203.66 | 2659.58 | 1.14377      | -1.18034     | 0.23787  | 0.908884 |
| gene44  | gene44  | SACOL0043 | gi 57650036 ref NC_002951.2 :49534-51600   | MR150 | M36C05 | NOTEST | 0       | 0       | 0            | 0            | 1        | 1        |
| gene440 | gene440 | SACOL0453 | gi 57650036 ref NC_002951.2 :454392-455148 | MR150 | M36C05 | OK     | 162.187 | 387.925 | 1.25812      | -1.46825     | 0.14204  | 0.740572 |
| gene441 | gene441 | SACOL0454 | gi 57650036 ref NC_002951.2 :455228-456617 | MR150 | M36C05 | OK     | 37.355  | 32.2638 | -0.211383    | 0.283041     | 0.77715  | 0.999883 |
| gene442 | gene442 | SACOL0455 | gi 57650036 ref NC_002951.2 :457593-458550 | MR150 | M36C05 | OK     | 89.2065 | 93.2356 | 0.0637331    | -0.080831    | 0.93558  | 0.999883 |
| gene443 | gene443 | SACOL0456 | gi 57650036 ref NC_002951.2 :458667-459330 | MR150 | M36C05 | OK     | 61.1655 | 185.204 | 1.59833      | -2.08957     | 0.03666  | 0.368762 |
| gene444 | gene444 | SACOL0457 | gi 57650036 ref NC_002951.2 :459472-459880 | MR150 | M36C05 | OK     | 975.999 | 4023.41 | 2.04347      | -2.17999     | 0.02926  | 0.32476  |
| gene445 | gene445 | xpt       | gi 57650036 ref NC_002951.2 :460391-462238 | MR150 | M36C05 | OK     | 64.6115 | 49.8117 | -0.375307    | 0.262674     | 0.7928   | 0.999883 |
| gene446 | gene446 | pbuX      | gi 57650036 ref NC_002951.2 :460391-462238 | MR150 | M36C05 | OK     | 55.73   | 36.8166 | -0.598095    | 0.629698     | 0.52889  | 0.999883 |
| gene447 | gene447 | guaB      | gi 57650036 ref NC_002951.2 :462275-463742 | MR150 | M36C05 | OK     | 116.894 | 118.06  | 0.014323     | -0.016588    | 0.98677  | 0.999883 |
| gene448 | gene448 | guaA      | gi 57650036 ref NC_002951.2 :463766-465308 | MR150 | M36C05 | OK     | 190.823 | 149.486 | -0.352225    | 0.390421     | 0.69623  | 0.999883 |
| gene449 | gene449 | SACOL0462 | gi 57650036 ref NC_002951.2 :465420-465957 | MR150 | M36C05 | OK     | 3.63244 | 5.57007 | 0.616756     | -0.786036    | 0.43185  | 0.999883 |
| gene45  | gene45  | SACOL0044 | gi 57650036 ref NC_002951.2 :49534-51600   | MR150 | M36C05 | NOTEST | 0       | 0       | 0            | 0            | 1        | 1        |
| gene450 | gene450 | SACOL0463 | gi 57650036 ref NC_002951.2 :466349-467054 | MR150 | M36C05 | OK     | 4.54721 | 2.40351 | -0.919841    | 1.18553      | 0.23581  | 0.904919 |
| gene451 | gene451 | SACOL0464 | gi 57650036 ref NC_002951.2 :467452-467725 | MR150 | M36C05 | OK     | 1.78971 | 2.57159 | 0.522936     | -0.344055    | 0.73081  | 0.999883 |
| gene452 | gene452 | SACOL0465 | gi 57650036 ref NC_002951.2 :467985-468138 | MR150 | M36C05 | OK     | 45.5773 | 0       | -1.79769e+30 | -1.79769e+30 | 0.04024  | 0.390941 |
| gene453 | gene453 | SACOL0466 | gi 57650036 ref NC_002951.2 :468661-469021 | MR150 | M36C05 | OK     | 62.9881 | 63.1587 | 0.00390278   | -0.005734    | 0.99543  | 0.999883 |
| gene454 | gene454 | SACOL0467 | gi 57650036 ref NC_002951.2 :469039-469885 | MR150 | M36C05 | OK     | 65.8914 | 68.6398 | 0.058956     | -0.078528    | 0.93741  | 0.999883 |

|         |         |           |                                            |       |        |        |         |         |              |              |         |           |
|---------|---------|-----------|--------------------------------------------|-------|--------|--------|---------|---------|--------------|--------------|---------|-----------|
| gene455 | gene455 | SACOL0468 | gi 57650036 ref NC_002951.2 :470356-471037 | MR150 | M36C05 | OK     | 7.63828 | 41.0666 | 2.42665      | -3.46733     | 0.00053 | 0.0209018 |
| gene456 | gene456 | SACOL0469 | gi 57650036 ref NC_002951.2 :471322-472018 | MR150 | M36C05 | OK     | 2.7778  | 2.66967 | -0.0572806   | 0.071832     | 0.94274 | 0.999883  |
| gene457 | gene457 | SACOL0470 | gi 57650036 ref NC_002951.2 :472308-473367 | MR150 | M36C05 | OK     | 1.42619 | 1.66874 | 0.226599     | -0.283075    | 0.77712 | 0.999883  |
| gene458 | gene458 | SACOL0471 | gi 57650036 ref NC_002951.2 :473485-473623 | MR150 | M36C05 | NOTEST | 0       | 0       | 0            | 0            | 1       | 1         |
| gene459 | gene459 | SACOL0472 | gi 57650036 ref NC_002951.2 :473731-474658 | MR150 | M36C05 | OK     | 0       | 1.66869 | 1.79769e+30  | 1.79769e+30  | 0.00606 | 0.121216  |
| gene46  | gene46  | SACOL0045 | gi 57650036 ref NC_002951.2 :51770-53348   | MR150 | M36C05 | NOTEST | 0       | 0       | 0            | 0            | 1       | 1         |
| gene460 | gene460 | SACOL0473 | gi 57650036 ref NC_002951.2 :475037-475736 | MR150 | M36C05 | OK     | 0.92037 | 1.32679 | 0.52766      | -0.539836    | 0.58931 | 0.999883  |
| gene461 | gene461 | SACOL0474 | gi 57650036 ref NC_002951.2 :476101-476785 | MR150 | M36C05 | OK     | 3.47919 | 2.96397 | -0.231221    | 0.296821     | 0.7666  | 0.999883  |
| gene462 | gene462 | SACOL0475 | gi 57650036 ref NC_002951.2 :476869-476971 | MR150 | M36C05 | NOTEST | 0       | 0       | 0            | 0            | 1       | 1         |
| gene463 | gene463 | hsdM1     | gi 57650036 ref NC_002951.2 :477048-479809 | MR150 | M36C05 | OK     | 17.2688 | 13.24   | -0.383263    | 0.400104     | 0.68908 | 0.999883  |
| gene464 | gene464 | SACOL0477 | gi 57650036 ref NC_002951.2 :477048-479809 | MR150 | M36C05 | OK     | 18.4624 | 10.6763 | -0.790182    | 0.687702     | 0.49164 | 0.999883  |
| gene465 | gene465 | SACOL0478 | gi 57650036 ref NC_002951.2 :480191-480869 | MR150 | M36C05 | NOTEST | 0.32026 | 0.46173 | 0.527818     | -0.347267    | 0.72839 | 1         |
| gene466 | gene466 | SACOL0479 | gi 57650036 ref NC_002951.2 :480890-482399 | MR150 | M36C05 | OK     | 3.15914 | 4.79982 | 0.603447     | -0.874091    | 0.38207 | 0.999883  |
| gene467 | gene467 | SACOL0480 | gi 57650036 ref NC_002951.2 :482502-482811 | MR150 | M36C05 | OK     | 1978.06 | 11330.7 | 2.51808      | -2.68125     | 0.00733 | 0.137988  |
| gene468 | gene468 | SACOL0481 | gi 57650036 ref NC_002951.2 :483148-483949 | MR150 | M36C05 | OK     | 3.31182 | 1.65194 | -1.00346     | 1.25425      | 0.20975 | 0.888223  |
| gene469 | gene469 | SACOL0482 | gi 57650036 ref NC_002951.2 :483980-484772 | MR150 | M36C05 | NOTEST | 0       | 0       | 0            | 0            | 1       | 1         |
| gene47  | gene47  | SACOL0046 | gi 57650036 ref NC_002951.2 :53427-54756   | MR150 | M36C05 | NOTEST | 0       | 0       | 0            | 0            | 1       | 1         |
| gene470 | gene470 | SACOL0483 | gi 57650036 ref NC_002951.2 :484841-485618 | MR150 | M36C05 | NOTEST | 0       | 0       | 0            | 0            | 1       | 1         |
| gene471 | gene471 | SACOL0484 | gi 57650036 ref NC_002951.2 :485793-486609 | MR150 | M36C05 | NOTEST | 0.24856 | 0       | -1.79769e+30 | -1.79769e+30 | 0.10824 | 1         |
| gene472 | gene472 | SACOL0485 | gi 57650036 ref NC_002951.2 :486627-487413 | MR150 | M36C05 | OK     | 7.83816 | 1.88254 | -2.05783     | 2.69451      | 0.00705 | 0.135319  |
| gene473 | gene473 | SACOL0486 | gi 57650036 ref NC_002951.2 :487592-490046 | MR150 | M36C05 | OK     | 41.0116 | 43.3357 | 0.0795211    | -0.061243    | 0.95117 | 0.999883  |
| gene474 | gene474 | SACOL0487 | gi 57650036 ref NC_002951.2 :487592-490046 | MR150 | M36C05 | OK     | 31.0114 | 36.7138 | 0.243523     | -0.226986    | 0.82043 | 0.999883  |
| gene475 | gene475 | SACOL0488 | gi 57650036 ref NC_002951.2 :487592-490046 | MR150 | M36C05 | OK     | 44.9066 | 49.5067 | 0.140697     | -0.052538    | 0.9581  | 0.999883  |
| gene476 | gene476 | SACOL0489 | gi 57650036 ref NC_002951.2 :490064-490379 | MR150 | M36C05 | OK     | 89.4702 | 64.5917 | -0.47006     | 0.690442     | 0.48992 | 0.999883  |
| gene477 | gene477 | SACOL0490 | gi 57650036 ref NC_002951.2 :490668-490929 | MR150 | M36C05 | OK     | 4.03937 | 13.0427 | 1.69104      | -1.65823     | 0.09727 | 0.628525  |
| gene478 | gene478 | SACOL0491 | gi 57650036 ref NC_002951.2 :491047-492250 | MR150 | M36C05 | OK     | 1.06882 | 1.97856 | 0.888431     | -1.12035     | 0.26257 | 0.944538  |
| gene479 | gene479 | nuoF      | gi 57650036 ref NC_002951.2 :493837-495322 | MR150 | M36C05 | OK     | 22.6461 | 15.5264 | -0.544539    | 0.768363     | 0.44227 | 0.999883  |
| gene48  | gene48  | SACOL0047 | gi 57650036 ref NC_002951.2 :54774-55842   | MR150 | M36C05 | NOTEST | 0       | 0       | 0            | 0            | 1       | 1         |
| gene480 | gene480 | SACOL0495 | gi 57650036 ref NC_002951.2 :495334-498040 | MR150 | M36C05 | OK     | 41.0153 | 25.9872 | -0.658361    | 0.817381     | 0.41371 | 0.999883  |
| gene481 | gene481 | SACOL0496 | gi 57650036 ref NC_002951.2 :498201-498564 | MR150 | M36C05 | OK     | 141.372 | 130.825 | -0.111865    | 0.159045     | 0.87363 | 0.999883  |
| gene482 | gene482 | SACOL0497 | gi 57650036 ref NC_002951.2 :498792-499140 | MR150 | M36C05 | OK     | 21.2106 | 13.8636 | -0.613479    | 0.842335     | 0.3996  | 0.999883  |
| gene483 | gene483 | SACOL0498 | gi 57650036 ref NC_002951.2 :499246-499921 | MR150 | M36C05 | OK     | 14.8248 | 7.89908 | -0.908258    | 1.31274      | 0.18927 | 0.848649  |
| gene484 | gene484 | SACOL0499 | gi 57650036 ref NC_002951.2 :499957-500692 | MR150 | M36C05 | OK     | 18.6004 | 14.2298 | -0.386424    | 0.567833     | 0.57015 | 0.999883  |



|         |         |            |                                            |       |        |        |         |         |              |              |         |           |
|---------|---------|------------|--------------------------------------------|-------|--------|--------|---------|---------|--------------|--------------|---------|-----------|
| gene485 | gene485 | SACOL0500  | gi 57650036 ref NC_002951.2 :500801-500918 | MR150 | M36C05 | NOTEST | 0       | 0       | 0            | 0            | 1       | 1         |
| gene486 | gene486 | SACOL0501  | gi 57650036 ref NC_002951.2 :501147-502485 | MR150 | M36C05 | OK     | 0.67291 | 2.13114 | 1.66315      | -2.03129     | 0.04223 | 0.400763  |
| gene487 | gene487 | SACOL0502  | gi 57650036 ref NC_002951.2 :502701-504742 | MR150 | M36C05 | OK     | 34.4795 | 9.40915 | -1.8736      | 1.34505      | 0.17861 | 0.821737  |
| gene488 | gene488 | SACOL0503  | gi 57650036 ref NC_002951.2 :502701-504742 | MR150 | M36C05 | OK     | 75.191  | 11.8089 | -2.67068     | 2.91746      | 0.00353 | 0.0854134 |
| gene489 | gene489 | SACOL0504  | gi 57650036 ref NC_002951.2 :505035-506061 | MR150 | M36C05 | OK     | 11.3089 | 12.5489 | 0.150094     | -0.2206      | 0.8254  | 0.999883  |
| gene49  | gene49  | SACOL0048  | gi 57650036 ref NC_002951.2 :55980-56241   | MR150 | M36C05 | NOTEST | 0       | 0       | 0            | 0            | 1       | 1         |
| gene490 | gene490 | SACOL0505  | gi 57650036 ref NC_002951.2 :506064-506724 | MR150 | M36C05 | OK     | 10.3161 | 9.59663 | -0.104304    | 0.150523     | 0.88035 | 0.999883  |
| gene491 | gene491 | SACOL0506  | gi 57650036 ref NC_002951.2 :506760-507603 | MR150 | M36C05 | OK     | 39.0524 | 28.9909 | -0.429814    | 0.61213      | 0.54045 | 0.999883  |
| gene492 | gene492 | SACOL0507  | gi 57650036 ref NC_002951.2 :507934-508939 | MR150 | M36C05 | OK     | 461.679 | 562.46  | 0.284859     | -0.298925    | 0.765   | 0.999883  |
| gene493 | gene493 | SACOL0508  | gi 57650036 ref NC_002951.2 :509123-509393 | MR150 | M36C05 | OK     | 291.135 | 137.63  | -1.08089     | 1.55556      | 0.11981 | 0.687616  |
| gene494 | gene494 | SACOL0509  | gi 57650036 ref NC_002951.2 :509541-510412 | MR150 | M36C05 | OK     | 12.4097 | 19.6074 | 0.659932     | -0.446088    | 0.65553 | 0.999883  |
| gene495 | gene495 | SACOL0510  | gi 57650036 ref NC_002951.2 :509541-510412 | MR150 | M36C05 | OK     | 34.2232 | 44.3965 | 0.375473     | -0.483765    | 0.62855 | 0.999883  |
| gene496 | gene496 | SACOL0511  | gi 57650036 ref NC_002951.2 :510580-512472 | MR150 | M36C05 | OK     | 15.4943 | 11.1642 | -0.472856    | 0.4759       | 0.63415 | 0.999883  |
| gene497 | gene497 | SACOL0512  | gi 57650036 ref NC_002951.2 :510580-512472 | MR150 | M36C05 | OK     | 10.064  | 8.09128 | -0.314765    | 0.328335     | 0.74266 | 0.999883  |
| gene498 | gene498 | gltC       | gi 57650036 ref NC_002951.2 :512592-513477 | MR150 | M36C05 | OK     | 1.11766 | 4.02531 | 1.84862      | -2.27043     | 0.02318 | 0.28925   |
| gene499 | gene499 | gltB       | gi 57650036 ref NC_002951.2 :513657-518157 | MR150 | M36C05 | OK     | 2.42255 | 14.2718 | 2.55857      | -3.50025     | 0.00046 | 0.019237  |
| gene5   | gene5   | gyrA       | gi 57650036 ref NC_002951.2 :7031-9695     | MR150 | M36C05 | OK     | 140.747 | 51.1613 | -1.45998     | 1.63134      | 0.10282 | 0.643766  |
| gene50  | gene50  | SACOL0049  | gi 57650036 ref NC_002951.2 :56264-56996   | MR150 | M36C05 | NOTEST | 0       | 0       | 0            | 0            | 1       | 1         |
| gene500 | gene500 | gltD       | gi 57650036 ref NC_002951.2 :518174-519638 | MR150 | M36C05 | OK     | 3.63509 | 12.3834 | 1.76835      | -2.56042     | 0.01045 | 0.17225   |
| gene501 | gene501 | SACOL_tRNA | gi 57650036 ref NC_002951.2 :519906-519999 | MR150 | M36C05 | NOTEST | 0       | 0       | 0            | 0            | 1       | 1         |
| gene502 | gene502 | SACOL0516  | gi 57650036 ref NC_002951.2 :520469-521897 | MR150 | M36C05 | OK     | 112.872 | 63.195  | -0.836808    | 1.00997      | 0.31251 | 0.994118  |
| gene503 | gene503 | SACOL0517  | gi 57650036 ref NC_002951.2 :521960-523601 | MR150 | M36C05 | OK     | 18.4945 | 6.96051 | -1.40983     | 2.02163      | 0.04321 | 0.407214  |
| gene504 | gene504 | SACOL0518  | gi 57650036 ref NC_002951.2 :523625-524354 | MR150 | M36C05 | OK     | 26.9146 | 8.34286 | -1.68977     | 2.44799      | 0.01437 | 0.20751   |
| gene505 | gene505 | SACOL0519  | gi 57650036 ref NC_002951.2 :524992-525517 | MR150 | M36C05 | OK     | 13.6526 | 9.51321 | -0.521171    | 0.740373     | 0.45907 | 0.999883  |
| gene506 | gene506 | dnaX       | gi 57650036 ref NC_002951.2 :525585-527283 | MR150 | M36C05 | OK     | 50.1008 | 55.9185 | 0.15849      | -0.197727    | 0.84326 | 0.999883  |
| gene507 | gene507 | SACOL0521  | gi 57650036 ref NC_002951.2 :527372-527690 | MR150 | M36C05 | OK     | 320.578 | 325.858 | 0.0235649    | -0.031649    | 0.97475 | 0.999883  |
| gene508 | gene508 | recR       | gi 57650036 ref NC_002951.2 :527696-528293 | MR150 | M36C05 | OK     | 184.286 | 203.823 | 0.14537      | -0.182022    | 0.85557 | 0.999883  |
| gene509 | gene509 | rrsA       | gi 57650036 ref NC_002951.2 :529145-530700 | MR150 | M36C05 | OK     | 14333.4 | 12635.1 | -0.181944    | 0.264479     | 0.79141 | 0.999883  |
| gene51  | gene51  | pls        | gi 57650036 ref NC_002951.2 :57211-61858   | MR150 | M36C05 | NOTEST | 0.03445 | 0       | -1.79769e+30 | -1.79769e+30 | 0.10824 | 1         |
| gene510 | gene510 | rrlA       | gi 57650036 ref NC_002951.2 :531064-533987 | MR150 | M36C05 | OK     | 33882.3 | 33541.8 | -0.0145713   | 0.034384     | 0.97257 | 0.999883  |
| gene511 | gene511 | rrfA       | gi 57650036 ref NC_002951.2 :534059-534174 | MR150 | M36C05 | OK     | 129984  | 80681.2 | -0.68803     | 0.928395     | 0.3532  | 0.999883  |
| gene512 | gene512 | SACOL0523  | gi 57650036 ref NC_002951.2 :535056-536394 | MR150 | M36C05 | OK     | 8.34402 | 11.6244 | 0.478344     | -0.701113    | 0.48323 | 0.999883  |
| gene513 | gene513 | tmk        | gi 57650036 ref NC_002951.2 :536395-537013 | MR150 | M36C05 | OK     | 29.2948 | 14.2598 | -1.03869     | 1.51902      | 0.12876 | 0.710909  |

|         |         |           |                                            |       |        |        |         |         |           |           |          |           |
|---------|---------|-----------|--------------------------------------------|-------|--------|--------|---------|---------|-----------|-----------|----------|-----------|
| gene514 | gene514 | SACOL0525 | gi 57650036 ref NC_002951.2 :537040-537370 | MR150 | M36C05 | OK     | 799.596 | 859.463 | 0.104165  | -0.124679 | 0.90078  | 0.999883  |
| gene515 | gene515 | SACOL0526 | gi 57650036 ref NC_002951.2 :537583-538510 | MR150 | M36C05 | OK     | 66.5575 | 50.3642 | -0.402204 | 0.537537  | 0.5909   | 0.999883  |
| gene516 | gene516 | SACOL0527 | gi 57650036 ref NC_002951.2 :538510-539314 | MR150 | M36C05 | OK     | 53.233  | 32.6918 | -0.703392 | 0.987567  | 0.32337  | 0.999883  |
| gene517 | gene517 | SACOL0528 | gi 57650036 ref NC_002951.2 :539330-539678 | MR150 | M36C05 | OK     | 109.083 | 35.0239 | -1.63901  | 2.37865   | 0.01738  | 0.238061  |
| gene518 | gene518 | SACOL0529 | gi 57650036 ref NC_002951.2 :539951-540918 | MR150 | M36C05 | OK     | 13.6795 | 5.6636  | -1.27222  | 1.66162   | 0.09659  | 0.62579   |
| gene519 | gene519 | SACOL0530 | gi 57650036 ref NC_002951.2 :539951-540918 | MR150 | M36C05 | OK     | 27.708  | 8.27482 | -1.7435   | 1.04262   | 0.29712  | 0.9791    |
| gene52  | gene52  | SACOL0051 | gi 57650036 ref NC_002951.2 :61981-63598   | MR150 | M36C05 | NOTEST | 0       | 0       | 0         | 0         | 1        | 1         |
| gene520 | gene520 | SACOL0531 | gi 57650036 ref NC_002951.2 :540919-541759 | MR150 | M36C05 | OK     | 9.80884 | 6.0322  | -0.701398 | 1.01346   | 0.31084  | 0.993813  |
| gene521 | gene521 | SACOL0532 | gi 57650036 ref NC_002951.2 :541783-541939 | MR150 | M36C05 | NOTEST | 0       | 0       | 0         | 0         | 1        | 1         |
| gene522 | gene522 | metS      | gi 57650036 ref NC_002951.2 :542043-544017 | MR150 | M36C05 | OK     | 29.0974 | 20.1904 | -0.527222 | 0.703064  | 0.48202  | 0.999883  |
| gene523 | gene523 | SACOL0534 | gi 57650036 ref NC_002951.2 :544047-544821 | MR150 | M36C05 | OK     | 49.0784 | 33.6342 | -0.545158 | 0.771296  | 0.44053  | 0.999883  |
| gene524 | gene524 | SACOL0535 | gi 57650036 ref NC_002951.2 :544987-545524 | MR150 | M36C05 | OK     | 22.7027 | 23.5909 | 0.0553621 | -0.08136  | 0.93516  | 0.999883  |
| gene525 | gene525 | ksgA      | gi 57650036 ref NC_002951.2 :545534-546428 | MR150 | M36C05 | OK     | 18.754  | 16.3689 | -0.196236 | 0.287358  | 0.77384  | 0.999883  |
| gene526 | gene526 | SACOL0537 | gi 57650036 ref NC_002951.2 :546527-546791 | MR150 | M36C05 | OK     | 8829.78 | 4474.57 | -0.980626 | 1.02229   | 0.30665  | 0.991033  |
| gene527 | gene527 | ipk       | gi 57650036 ref NC_002951.2 :547100-547949 | MR150 | M36C05 | OK     | 43.4101 | 48.2674 | 0.153018  | -0.212051 | 0.83207  | 0.999883  |
| gene528 | gene528 | purR      | gi 57650036 ref NC_002951.2 :547962-548787 | MR150 | M36C05 | OK     | 55.1201 | 59.6539 | 0.114037  | -0.154976 | 0.87684  | 0.999883  |
| gene529 | gene529 | SACOL0540 | gi 57650036 ref NC_002951.2 :548803-549184 | MR150 | M36C05 | OK     | 84.5491 | 998.901 | 3.56248   | -4.50242  | 6.72E-06 | 0.0006002 |
| gene53  | gene53  | SACOL0052 | gi 57650036 ref NC_002951.2 :63757-65269   | MR150 | M36C05 | NOTEST | 0       | 0       | 0         | 0         | 1        | 1         |
| gene530 | gene530 | spoVG     | gi 57650036 ref NC_002951.2 :549255-549558 | MR150 | M36C05 | OK     | 357.541 | 3141.43 | 3.13524   | -3.69824  | 0.00022  | 0.0105329 |
| gene531 | gene531 | SACOL0542 | gi 57650036 ref NC_002951.2 :549747-549879 | MR150 | M36C05 | NOTEST | 0       | 0       | 0         | 0         | 1        | 1         |
| gene532 | gene532 | glmU      | gi 57650036 ref NC_002951.2 :549901-551254 | MR150 | M36C05 | OK     | 53.2651 | 50.2904 | -0.08291  | 0.106903  | 0.91487  | 0.999883  |
| gene533 | gene533 | prsA      | gi 57650036 ref NC_002951.2 :551400-552366 | MR150 | M36C05 | OK     | 117.145 | 48.3729 | -1.27603  | 1.64242   | 0.1005   | 0.638047  |
| gene534 | gene534 | rplY      | gi 57650036 ref NC_002951.2 :552515-553169 | MR150 | M36C05 | OK     | 863.838 | 190.828 | -2.17849  | 2.4675    | 0.01361  | 0.201778  |
| gene535 | gene535 | pth       | gi 57650036 ref NC_002951.2 :553479-560527 | MR150 | M36C05 | OK     | 47.1854 | 36.9987 | -0.350866 | 0.106888  | 0.91488  | 0.999883  |
| gene536 | gene536 | mfd       | gi 57650036 ref NC_002951.2 :553479-560527 | MR150 | M36C05 | OK     | 47.0631 | 18.4583 | -1.35032  | 1.05949   | 0.28938  | 0.975616  |
| gene537 | gene537 | SACOL0548 | gi 57650036 ref NC_002951.2 :553479-560527 | MR150 | M36C05 | OK     | 38.319  | 14.204  | -1.43176  | 0.632958  | 0.52676  | 0.999883  |
| gene538 | gene538 | SACOL0549 | gi 57650036 ref NC_002951.2 :553479-560527 | MR150 | M36C05 | OK     | 68.5613 | 40.2625 | -0.767959 | 0.436605  | 0.6624   | 0.999883  |
| gene539 | gene539 | SACOL0550 | gi 57650036 ref NC_002951.2 :553479-560527 | MR150 | M36C05 | OK     | 35.233  | 26.6929 | -0.40047  | 0.048027  | 0.96169  | 0.999883  |
| gene54  | gene54  | SACOL0054 | gi 57650036 ref NC_002951.2 :65291-67344   | MR150 | M36C05 | NOTEST | 0       | 0       | 0         | 0         | 1        | 1         |
| gene540 | gene540 | SACOL0551 | gi 57650036 ref NC_002951.2 :560544-560937 | MR150 | M36C05 | OK     | 105.488 | 63.1148 | -0.741023 | 1.07281   | 0.28336  | 0.969575  |
| gene541 | gene541 | SACOL0552 | gi 57650036 ref NC_002951.2 :561041-561443 | MR150 | M36C05 | OK     | 332.206 | 118.07  | -1.49243  | 1.99592   | 0.04594  | 0.421504  |
| gene542 | gene542 | SACOL0553 | gi 57650036 ref NC_002951.2 :561622-562918 | MR150 | M36C05 | OK     | 9.36235 | 4.42575 | -1.08095  | 1.57643   | 0.11493  | 0.670749  |
| gene543 | gene543 | hpt       | gi 57650036 ref NC_002951.2 :562922-563462 | MR150 | M36C05 | OK     | 26.5534 | 11.0417 | -1.26593  | 1.83164   | 0.06701  | 0.516972  |

|         |         |             |                                            |       |        |        |         |         |            |           |         |          |
|---------|---------|-------------|--------------------------------------------|-------|--------|--------|---------|---------|------------|-----------|---------|----------|
| gene544 | gene544 | SACOL0555   | gi 57650036 ref NC_002951.2 :563718-565812 | MR150 | M36C05 | OK     | 183.582 | 219.945 | 0.260717   | -0.27521  | 0.78316 | 0.999883 |
| gene545 | gene545 | hslO        | gi 57650036 ref NC_002951.2 :566040-566922 | MR150 | M36C05 | OK     | 58.5984 | 33.9615 | -0.786961  | 1.08559   | 0.27766 | 0.963271 |
| gene546 | gene546 | cysK        | gi 57650036 ref NC_002951.2 :567100-568033 | MR150 | M36C05 | OK     | 160.228 | 465.361 | 1.53823    | -1.72667  | 0.08423 | 0.577775 |
| gene547 | gene547 | folP        | gi 57650036 ref NC_002951.2 :568248-569868 | MR150 | M36C05 | OK     | 13.435  | 15.524  | 0.208508   | -0.179295 | 0.85771 | 0.999883 |
| gene548 | gene548 | folB        | gi 57650036 ref NC_002951.2 :568248-569868 | MR150 | M36C05 | OK     | 15.4426 | 26.2473 | 0.765259   | -0.402118 | 0.6876  | 0.999883 |
| gene549 | gene549 | folK        | gi 57650036 ref NC_002951.2 :568248-569868 | MR150 | M36C05 | OK     | 49.1293 | 32.2832 | -0.605799  | 0.583536  | 0.55953 | 0.999883 |
| gene55  | gene55  | SACOL0057   | gi 57650036 ref NC_002951.2 :68406-68499   | MR150 | M36C05 | NOTEST | 0       | 0       | 0          | 0         | 1       | 1        |
| gene550 | gene550 | SACOL0561   | gi 57650036 ref NC_002951.2 :570261-570354 | MR150 | M36C05 | NOTEST | 0       | 0       | 0          | 0         | 1       | 1        |
| gene551 | gene551 | lysS        | gi 57650036 ref NC_002951.2 :570406-571894 | MR150 | M36C05 | OK     | 115.345 | 137.358 | 0.251984   | -0.289135 | 0.77248 | 0.999883 |
| gene552 | gene552 | rrfG        | gi 57650036 ref NC_002951.2 :572451-572566 | MR150 | M36C05 | OK     | 134529  | 113856  | -0.240706  | 0.318569  | 0.75005 | 0.999883 |
| gene554 | gene554 | rrsB        | gi 57650036 ref NC_002951.2 :572775-574330 | MR150 | M36C05 | OK     | 14934.4 | 12971.5 | -0.203298  | 0.298017  | 0.76569 | 0.999883 |
| gene555 | gene555 | SACOL_tRNA- | gi 57650036 ref NC_002951.2 :574422-574499 | MR150 | M36C05 | NOTEST | 0       | 0       | 0          | 0         | 1       | 1        |
| gene556 | gene556 | rrlB        | gi 57650036 ref NC_002951.2 :574666-577589 | MR150 | M36C05 | OK     | 38209.6 | 39771.2 | 0.0577861  | -0.143755 | 0.88569 | 0.999883 |
| gene557 | gene557 | rrfB        | gi 57650036 ref NC_002951.2 :577661-577776 | MR150 | M36C05 | OK     | 169070  | 303616  | 0.844626   | -1.0422   | 0.29732 | 0.9791   |
| gene558 | gene558 | rrsC        | gi 57650036 ref NC_002951.2 :577987-579542 | MR150 | M36C05 | OK     | 15002.9 | 12997.3 | -0.207034  | 0.303726  | 0.76134 | 0.999883 |
| gene559 | gene559 | rrlC        | gi 57650036 ref NC_002951.2 :579844-582767 | MR150 | M36C05 | OK     | 30782.3 | 31420.1 | 0.0295876  | -0.067844 | 0.94591 | 0.999883 |
| gene56  | gene56  | SACOL0058   | gi 57650036 ref NC_002951.2 :68645-70391   | MR150 | M36C05 | NOTEST | 0       | 0       | 0          | 0         | 1       | 1        |
| gene560 | gene560 | rrfC        | gi 57650036 ref NC_002951.2 :582839-582954 | MR150 | M36C05 | OK     | 534934  | 506911  | -0.0776282 | 0.087372  | 0.93038 | 0.999883 |
| gene561 | gene561 | SACOL0563   | gi 57650036 ref NC_002951.2 :583478-584861 | MR150 | M36C05 | OK     | 1.55356 | 1.30456 | -0.252017  | 0.327642  | 0.74318 | 0.999883 |
| gene562 | gene562 | SACOL0564   | gi 57650036 ref NC_002951.2 :584964-585852 | MR150 | M36C05 | OK     | 237.469 | 56.5892 | -2.06914   | 2.55485   | 0.01062 | 0.173548 |
| gene563 | gene563 | SACOL0565   | gi 57650036 ref NC_002951.2 :585855-586416 | MR150 | M36C05 | OK     | 308.193 | 73.0966 | -2.07596   | 2.67345   | 0.00751 | 0.140392 |
| gene564 | gene564 | nupC        | gi 57650036 ref NC_002951.2 :586623-587838 | MR150 | M36C05 | OK     | 103.205 | 36.3874 | -1.504     | 1.91614   | 0.05535 | 0.466228 |
| gene565 | gene565 | ctsR        | gi 57650036 ref NC_002951.2 :587995-588457 | MR150 | M36C05 | OK     | 458.55  | 187.883 | -1.28724   | 1.604     | 0.10871 | 0.655235 |
| gene566 | gene566 | SACOL0568   | gi 57650036 ref NC_002951.2 :588475-590039 | MR150 | M36C05 | OK     | 419.09  | 232.546 | -0.849743  | 0.531207  | 0.59528 | 0.999883 |
| gene567 | gene567 | SACOL0569   | gi 57650036 ref NC_002951.2 :588475-590039 | MR150 | M36C05 | OK     | 415.618 | 174.552 | -1.2516    | 1.0851    | 0.27788 | 0.963271 |
| gene568 | gene568 | clpC        | gi 57650036 ref NC_002951.2 :590052-592508 | MR150 | M36C05 | OK     | 532.458 | 214.923 | -1.30885   | 1.34947   | 0.17719 | 0.821477 |
| gene569 | gene569 | radA        | gi 57650036 ref NC_002951.2 :592994-594359 | MR150 | M36C05 | OK     | 32.7343 | 16.1806 | -1.01654   | 1.41561   | 0.15689 | 0.774623 |
| gene57  | gene57  | SACOL0059   | gi 57650036 ref NC_002951.2 :70484-70937   | MR150 | M36C05 | OK     | 19.327  | 17.8818 | -0.112131  | 0.16207   | 0.87125 | 0.999883 |
| gene570 | gene570 | SACOL0573   | gi 57650036 ref NC_002951.2 :594383-595457 | MR150 | M36C05 | OK     | 29.0857 | 11.4805 | -1.34112   | 1.92755   | 0.05391 | 0.461181 |
| gene571 | gene571 | gltX        | gi 57650036 ref NC_002951.2 :596013-597468 | MR150 | M36C05 | OK     | 56.0155 | 25.3838 | -1.14192   | 1.50427   | 0.13251 | 0.721045 |
| gene572 | gene572 | cysE        | gi 57650036 ref NC_002951.2 :597896-600319 | MR150 | M36C05 | OK     | 20.0865 | 57.4322 | 1.51563    | -0.833316 | 0.40467 | 0.999883 |
| gene573 | gene573 | cysS        | gi 57650036 ref NC_002951.2 :597896-600319 | MR150 | M36C05 | OK     | 23.3368 | 80.2202 | 1.78136    | -1.83727  | 0.06617 | 0.515048 |
| gene574 | gene574 | SACOL0577   | gi 57650036 ref NC_002951.2 :597896-600319 | MR150 | M36C05 | OK     | 20.7928 | 84.7463 | 2.02707    | -0.85564  | 0.3922  | 0.999883 |

|         |         |           |                                            |       |        |        |         |         |             |             |          |           |
|---------|---------|-----------|--------------------------------------------|-------|--------|--------|---------|---------|-------------|-------------|----------|-----------|
| gene575 | gene575 | SACOL0578 | gi 57650036 ref NC_002951.2 :600326-601597 | MR150 | M36C05 | OK     | 22.9507 | 73.0144 | 1.66964     | -1.5939     | 0.11096  | 0.661451  |
| gene576 | gene576 | SACOL0579 | gi 57650036 ref NC_002951.2 :600326-601597 | MR150 | M36C05 | OK     | 40.0162 | 103.966 | 1.37745     | -1.265      | 0.20587  | 0.878491  |
| gene577 | gene577 | SACOL0580 | gi 57650036 ref NC_002951.2 :601677-602247 | MR150 | M36C05 | OK     | 19.8542 | 34.912  | 0.814278    | -1.19322    | 0.23278  | 0.902162  |
| gene578 | gene578 | secE      | gi 57650036 ref NC_002951.2 :602560-602743 | MR150 | M36C05 | OK     | 219.28  | 91.2481 | -1.26491    | 1.74213     | 0.08149  | 0.568124  |
| gene579 | gene579 | nusG      | gi 57650036 ref NC_002951.2 :602755-603304 | MR150 | M36C05 | OK     | 224.06  | 119.906 | -0.901989   | 1.16466     | 0.24416  | 0.917433  |
| gene58  | gene58  | SACOL0061 | gi 57650036 ref NC_002951.2 :71151-72167   | MR150 | M36C05 | NOTEST | 0       | 0       | 0           | 0           | 1        | 1         |
| gene580 | gene580 | rplK      | gi 57650036 ref NC_002951.2 :603475-603907 | MR150 | M36C05 | OK     | 519.115 | 157.756 | -1.71836    | 2.16928     | 0.03006  | 0.330484  |
| gene581 | gene581 | rplA      | gi 57650036 ref NC_002951.2 :604114-604807 | MR150 | M36C05 | OK     | 761.397 | 154.665 | -2.2995     | 2.62704     | 0.00861  | 0.152769  |
| gene582 | gene582 | rplJ      | gi 57650036 ref NC_002951.2 :605078-605579 | MR150 | M36C05 | OK     | 244.951 | 34.8505 | -2.81324    | 3.80183     | 0.00014  | 0.0078747 |
| gene583 | gene583 | rplL      | gi 57650036 ref NC_002951.2 :605621-605990 | MR150 | M36C05 | OK     | 913.795 | 90.9789 | -3.32827    | 4.2476      | 2.16E-05 | 0.0014979 |
| gene584 | gene584 | SACOL0587 | gi 57650036 ref NC_002951.2 :606164-606773 | MR150 | M36C05 | OK     | 56.5095 | 19.9721 | -1.50051    | 2.16634     | 0.03029  | 0.331579  |
| gene585 | gene585 | rpoB      | gi 57650036 ref NC_002951.2 :606987-610539 | MR150 | M36C05 | OK     | 189.244 | 111.104 | -0.768343   | 0.799975    | 0.42373  | 0.999883  |
| gene586 | gene586 | rpoC      | gi 57650036 ref NC_002951.2 :610675-614299 | MR150 | M36C05 | OK     | 192.692 | 94.7043 | -1.02479    | 1.07292     | 0.28331  | 0.969575  |
| gene587 | gene587 | SACOL0590 | gi 57650036 ref NC_002951.2 :614435-614690 | MR150 | M36C05 | OK     | 312.561 | 26.2795 | -3.57213    | 4.89233     | 9.97E-07 | 0.0001163 |
| gene588 | gene588 | rpsL      | gi 57650036 ref NC_002951.2 :614787-615201 | MR150 | M36C05 | OK     | 957.15  | 280.331 | -1.77161    | 2.11697     | 0.03426  | 0.354225  |
| gene589 | gene589 | rpsG      | gi 57650036 ref NC_002951.2 :615266-615737 | MR150 | M36C05 | OK     | 1186.99 | 261.515 | -2.18234    | 2.52271     | 0.01165  | 0.184014  |
| gene59  | gene59  | SACOL0062 | gi 57650036 ref NC_002951.2 :71151-72167   | MR150 | M36C05 | NOTEST | 0       | 0       | 0           | 0           | 1        | 1         |
| gene590 | gene590 | fusA      | gi 57650036 ref NC_002951.2 :615859-617941 | MR150 | M36C05 | OK     | 715.813 | 164.957 | -2.11749    | 2.22567     | 0.02604  | 0.306341  |
| gene591 | gene591 | tuf       | gi 57650036 ref NC_002951.2 :618157-619342 | MR150 | M36C05 | OK     | 1292.48 | 543.421 | -1.25       | 1.28626     | 0.19835  | 0.863702  |
| gene592 | gene592 | SACOL0595 | gi 57650036 ref NC_002951.2 :619623-620799 | MR150 | M36C05 | OK     | 20.3984 | 43.4909 | 1.09226     | -1.50972    | 0.13111  | 0.718382  |
| gene593 | gene593 | SACOL0596 | gi 57650036 ref NC_002951.2 :620969-622157 | MR150 | M36C05 | OK     | 357.598 | 350.17  | -0.0302845  | 0.032193    | 0.97432  | 0.999883  |
| gene594 | gene594 | SACOL0597 | gi 57650036 ref NC_002951.2 :622422-623301 | MR150 | M36C05 | OK     | 195.965 | 1032.61 | 2.39763     | -2.61403    | 0.00895  | 0.156042  |
| gene595 | gene595 | SACOL0598 | gi 57650036 ref NC_002951.2 :623460-625098 | MR150 | M36C05 | OK     | 12.7814 | 8.35471 | -0.613384   | 0.891279    | 0.37278  | 0.999883  |
| gene596 | gene596 | SACOL0599 | gi 57650036 ref NC_002951.2 :625311-626277 | MR150 | M36C05 | OK     | 100.153 | 50.6764 | -0.982823   | 1.2752      | 0.20224  | 0.871437  |
| gene597 | gene597 | ilvE      | gi 57650036 ref NC_002951.2 :626611-627834 | MR150 | M36C05 | OK     | 121.009 | 266.417 | 1.13857     | -1.25825    | 0.2083   | 0.885625  |
| gene598 | gene598 | SACOL0601 | gi 57650036 ref NC_002951.2 :626611-627834 | MR150 | M36C05 | OK     | 0       | 13.8763 | 1.79769e+30 | 1.79769e+30 | 0.47241  | 0.999883  |
| gene599 | gene599 | SACOL0602 | gi 57650036 ref NC_002951.2 :627937-628621 | MR150 | M36C05 | OK     | 73.0631 | 140.675 | 0.945149    | -1.24132    | 0.21449  | 0.89416   |
| gene6   | gene6   | SACOL0007 | gi 57650036 ref NC_002951.2 :9781-10483    | MR150 | M36C05 | OK     | 29.5809 | 19.3432 | -0.612842   | 0.896344    | 0.37007  | 0.999883  |
| gene60  | gene60  | SACOL0063 | gi 57650036 ref NC_002951.2 :72303-73371   | MR150 | M36C05 | NOTEST | 0       | 0       | 0           | 0           | 1        | 1         |
| gene600 | gene600 | SACOL0603 | gi 57650036 ref NC_002951.2 :628736-630009 | MR150 | M36C05 | OK     | 50.9162 | 27.1729 | -0.905958   | 1.17503     | 0.23998  | 0.911371  |
| gene601 | gene601 | SACOL0604 | gi 57650036 ref NC_002951.2 :628736-630009 | MR150 | M36C05 | OK     | 10.6194 | 6.60177 | -0.685775   | 0.399894    | 0.68923  | 0.999883  |
| gene602 | gene602 | SACOL0605 | gi 57650036 ref NC_002951.2 :630075-630545 | MR150 | M36C05 | OK     | 24.3481 | 22.8954 | -0.0887497  | 0.129903    | 0.89664  | 0.999883  |
| gene603 | gene603 | SACOL0606 | gi 57650036 ref NC_002951.2 :630692-631562 | MR150 | M36C05 | OK     | 23.3105 | 17.4499 | -0.417759   | 0.609555    | 0.54216  | 0.999883  |

|         |         |           |                                            |       |        |        |         |         |            |           |          |           |
|---------|---------|-----------|--------------------------------------------|-------|--------|--------|---------|---------|------------|-----------|----------|-----------|
| gene604 | gene604 | SACOL0607 | gi 57650036 ref NC_002951.2 :631582-632149 | MR150 | M36C05 | OK     | 60.0488 | 28.5794 | -1.07116   | 1.54885   | 0.12142  | 0.692806  |
| gene605 | gene605 | sdrC      | gi 57650036 ref NC_002951.2 :632578-635422 | MR150 | M36C05 | OK     | 7.76339 | 4.45931 | -0.799866  | 1.1585    | 0.24666  | 0.921573  |
| gene606 | gene606 | sdrD      | gi 57650036 ref NC_002951.2 :635788-639934 | MR150 | M36C05 | OK     | 82.5732 | 17.7861 | -2.21492   | 2.55982   | 0.01047  | 0.17225   |
| gene607 | gene607 | sdrE      | gi 57650036 ref NC_002951.2 :640327-643828 | MR150 | M36C05 | OK     | 8.90997 | 9.74664 | 0.129484   | -0.178799 | 0.8581   | 0.999883  |
| gene608 | gene608 | SACOL0611 | gi 57650036 ref NC_002951.2 :643946-645419 | MR150 | M36C05 | OK     | 9.62505 | 12.8154 | 0.413009   | -0.601728 | 0.54736  | 0.999883  |
| gene609 | gene609 | SACOL0612 | gi 57650036 ref NC_002951.2 :645542-647033 | MR150 | M36C05 | OK     | 52.0813 | 68.2204 | 0.389438   | -0.487408 | 0.62597  | 0.999883  |
| gene61  | gene61  | SACOL0064 | gi 57650036 ref NC_002951.2 :73401-74736   | MR150 | M36C05 | NOTEST | 0       | 0       | 0          | 0         | 1        | 1         |
| gene610 | gene610 | SACOL0613 | gi 57650036 ref NC_002951.2 :647314-648193 | MR150 | M36C05 | OK     | 195.514 | 62.3758 | -1.64821   | 2.05428   | 0.03995  | 0.389112  |
| gene611 | gene611 | SACOL0614 | gi 57650036 ref NC_002951.2 :648205-648871 | MR150 | M36C05 | OK     | 74.8975 | 25.5767 | -1.55009   | 2.18752   | 0.0287   | 0.322068  |
| gene612 | gene612 | SACOL0615 | gi 57650036 ref NC_002951.2 :648884-649247 | MR150 | M36C05 | OK     | 243.013 | 70.7522 | -1.78019   | 2.49237   | 0.01269  | 0.19349   |
| gene613 | gene613 | nagB      | gi 57650036 ref NC_002951.2 :649522-650281 | MR150 | M36C05 | OK     | 13.4203 | 15.9862 | 0.252416   | -0.370993 | 0.71064  | 0.999883  |
| gene614 | gene614 | SACOL0617 | gi 57650036 ref NC_002951.2 :650357-650990 | MR150 | M36C05 | OK     | 47.017  | 197.552 | 2.07097    | -2.7414   | 0.00612  | 0.121632  |
| gene615 | gene615 | SACOL0618 | gi 57650036 ref NC_002951.2 :650991-651540 | MR150 | M36C05 | OK     | 90.3257 | 261.008 | 1.53089    | -1.98367  | 0.04729  | 0.426221  |
| gene616 | gene616 | SACOL0619 | gi 57650036 ref NC_002951.2 :651643-652300 | MR150 | M36C05 | OK     | 2.67969 | 4.10539 | 0.615452   | -0.784374 | 0.43282  | 0.999883  |
| gene617 | gene617 | proP      | gi 57650036 ref NC_002951.2 :652801-654202 | MR150 | M36C05 | OK     | 358.086 | 246.076 | -0.541204  | 0.574994  | 0.5653   | 0.999883  |
| gene618 | gene618 | SACOL0621 | gi 57650036 ref NC_002951.2 :654745-656122 | MR150 | M36C05 | OK     | 1.6916  | 3.55901 | 1.07309    | -1.48228  | 0.13827  | 0.733494  |
| gene619 | gene619 | atoB      | gi 57650036 ref NC_002951.2 :656123-657603 | MR150 | M36C05 | OK     | 3.42127 | 9.26618 | 1.43744    | -1.93119  | 0.05346  | 0.457851  |
| gene62  | gene62  | SACOL0065 | gi 57650036 ref NC_002951.2 :74754-75948   | MR150 | M36C05 | NOTEST | 0       | 0       | 0          | 0         | 1        | 1         |
| gene620 | gene620 | SACOL0623 | gi 57650036 ref NC_002951.2 :656123-657603 | MR150 | M36C05 | OK     | 3.63355 | 6.56184 | 0.852721   | -0.447457 | 0.65455  | 0.999883  |
| gene621 | gene621 | SACOL0624 | gi 57650036 ref NC_002951.2 :657605-657875 | MR150 | M36C05 | OK     | 5.52788 | 2.64674 | -1.06251   | 0.876128  | 0.38096  | 0.999883  |
| gene622 | gene622 | SACOL0625 | gi 57650036 ref NC_002951.2 :658075-658243 | MR150 | M36C05 | OK     | 540.158 | 667.652 | 0.305715   | -0.448973 | 0.65345  | 0.999883  |
| gene623 | gene623 | thiD1     | gi 57650036 ref NC_002951.2 :658749-659580 | MR150 | M36C05 | OK     | 86.6262 | 86.8807 | 0.00423294 | -0.005509 | 0.9956   | 0.999883  |
| gene624 | gene624 | ung       | gi 57650036 ref NC_002951.2 :659763-660420 | MR150 | M36C05 | OK     | 64.6476 | 19.561  | -1.72462   | 2.46052   | 0.01387  | 0.204544  |
| gene625 | gene625 | SACOL0628 | gi 57650036 ref NC_002951.2 :660420-660801 | MR150 | M36C05 | OK     | 61.1097 | 18.1398 | -1.75224   | 2.51934   | 0.01176  | 0.184977  |
| gene626 | gene626 | SACOL0629 | gi 57650036 ref NC_002951.2 :660933-661302 | MR150 | M36C05 | OK     | 72.3532 | 15.4858 | -2.22411   | 3.15808   | 0.00159  | 0.0489071 |
| gene627 | gene627 | SACOL0630 | gi 57650036 ref NC_002951.2 :661422-662907 | MR150 | M36C05 | OK     | 20.5007 | 409.605 | 4.32049    | -5.08295  | 3.72E-07 | 5.27E-05  |
| gene628 | gene628 | SACOL0631 | gi 57650036 ref NC_002951.2 :663048-663501 | MR150 | M36C05 | OK     | 10.8714 | 22.2432 | 1.03282    | -1.46699  | 0.14238  | 0.740755  |
| gene629 | gene629 | SACOL0632 | gi 57650036 ref NC_002951.2 :663513-664278 | MR150 | M36C05 | OK     | 19.7813 | 37.8808 | 0.93733    | -1.35632  | 0.175    | 0.821477  |
| gene63  | gene63  | SACOL0066 | gi 57650036 ref NC_002951.2 :76214-76316   | MR150 | M36C05 | NOTEST | 0       | 0       | 0          | 0         | 1        | 1         |
| gene630 | gene630 | SACOL0633 | gi 57650036 ref NC_002951.2 :664826-665579 | MR150 | M36C05 | OK     | 202.379 | 171.575 | -0.238224  | 0.287925  | 0.7734   | 0.999883  |
| gene631 | gene631 | eutD      | gi 57650036 ref NC_002951.2 :665746-666733 | MR150 | M36C05 | OK     | 127.641 | 59.1312 | -1.1101    | 1.40317   | 0.16057  | 0.783033  |
| gene632 | gene632 | SACOL0635 | gi 57650036 ref NC_002951.2 :666735-667572 | MR150 | M36C05 | OK     | 138.691 | 47.0999 | -1.55808   | 2.02748   | 0.04261  | 0.403652  |
| gene633 | gene633 | mvk       | gi 57650036 ref NC_002951.2 :668158-669079 | MR150 | M36C05 | OK     | 10.6188 | 15.2963 | 0.526558   | -0.77325  | 0.43937  | 0.999883  |

|         |         |           |                                            |       |        |        |         |         |             |             |         |          |
|---------|---------|-----------|--------------------------------------------|-------|--------|--------|---------|---------|-------------|-------------|---------|----------|
| gene634 | gene634 | mvaD      | gi 57650036 ref NC_002951.2 :669083-670067 | MR150 | M36C05 | OK     | 11.5238 | 32.914  | 1.51408     | -2.17538    | 0.0296  | 0.327061 |
| gene635 | gene635 | SACOL0638 | gi 57650036 ref NC_002951.2 :670079-671156 | MR150 | M36C05 | OK     | 13.7947 | 23.5111 | 0.769231    | -1.11365    | 0.26543 | 0.948965 |
| gene636 | gene636 | SACOL0639 | gi 57650036 ref NC_002951.2 :671332-671674 | MR150 | M36C05 | OK     | 17.8261 | 9.84805 | -0.856082   | 1.12904     | 0.25888 | 0.938582 |
| gene637 | gene637 | SACOL0640 | gi 57650036 ref NC_002951.2 :671726-673476 | MR150 | M36C05 | OK     | 39.0041 | 84.2257 | 1.11063     | -1.33377    | 0.18228 | 0.830192 |
| gene638 | gene638 | SACOL0641 | gi 57650036 ref NC_002951.2 :671726-673476 | MR150 | M36C05 | OK     | 22.8134 | 30.6622 | 0.42658     | -0.157907   | 0.87453 | 0.999883 |
| gene639 | gene639 | SACOL0642 | gi 57650036 ref NC_002951.2 :673533-673635 | MR150 | M36C05 | NOTEST | 0       | 0       | 0           | 0           | 1       | 1        |
| gene64  | gene64  | SACOL0067 | gi 57650036 ref NC_002951.2 :76614-77547   | MR150 | M36C05 | OK     | 19.0101 | 17.7538 | -0.0986344  | 0.144035    | 0.88547 | 0.999883 |
| gene640 | gene640 | SACOL0643 | gi 57650036 ref NC_002951.2 :674100-675510 | MR150 | M36C05 | OK     | 10.8855 | 12.3899 | 0.186755    | -0.272299   | 0.78539 | 0.999883 |
| gene641 | gene641 | SACOL0644 | gi 57650036 ref NC_002951.2 :675513-676140 | MR150 | M36C05 | OK     | 1.07542 | 4.65289 | 2.11322     | -2.3554     | 0.0185  | 0.246604 |
| gene642 | gene642 | SACOL0645 | gi 57650036 ref NC_002951.2 :676265-676907 | MR150 | M36C05 | OK     | 3.80951 | 1.74794 | -1.12395    | 1.34655     | 0.17813 | 0.821737 |
| gene643 | gene643 | SACOL0646 | gi 57650036 ref NC_002951.2 :676994-677612 | MR150 | M36C05 | OK     | 6.22515 | 4.22513 | -0.559113   | 0.750574    | 0.45291 | 0.999883 |
| gene644 | gene644 | SACOL0647 | gi 57650036 ref NC_002951.2 :677686-678316 | MR150 | M36C05 | OK     | 2.84781 | 2.82356 | -0.0123355  | 0.015182    | 0.98789 | 0.999883 |
| gene645 | gene645 | SACOL0648 | gi 57650036 ref NC_002951.2 :678511-679132 | MR150 | M36C05 | OK     | 3.27221 | 2.35967 | -0.47168    | 0.574435    | 0.56567 | 0.999883 |
| gene646 | gene646 | SACOL0649 | gi 57650036 ref NC_002951.2 :679262-679904 | MR150 | M36C05 | OK     | 2.42424 | 1.24853 | -0.957305   | 1.0563      | 0.29083 | 0.975616 |
| gene647 | gene647 | SACOL0650 | gi 57650036 ref NC_002951.2 :679950-680580 | MR150 | M36C05 | OK     | 1.77988 | 2.82356 | 0.665736    | -0.777406   | 0.43692 | 0.999883 |
| gene648 | gene648 | SACOL0651 | gi 57650036 ref NC_002951.2 :681032-681662 | MR150 | M36C05 | OK     | 1.06793 | 1.28344 | 0.265198    | -0.265537   | 0.7906  | 0.999883 |
| gene649 | gene649 | SACOL0652 | gi 57650036 ref NC_002951.2 :681776-682427 | MR150 | M36C05 | OK     | 1.01824 | 1.22356 | 0.265007    | -0.265345   | 0.79074 | 0.999883 |
| gene65  | gene65  | SACOL0068 | gi 57650036 ref NC_002951.2 :77909-78113   | MR150 | M36C05 | NOTEST | 0       | 0       | 0           | 0           | 1       | 1        |
| gene650 | gene650 | SACOL0653 | gi 57650036 ref NC_002951.2 :682463-683099 | MR150 | M36C05 | OK     | 5.6173  | 2.53148 | -1.1499     | 1.47176     | 0.14109 | 0.739348 |
| gene651 | gene651 | SACOL0654 | gi 57650036 ref NC_002951.2 :683333-683960 | MR150 | M36C05 | OK     | 5.01864 | 1.29247 | -1.95717    | 2.25956     | 0.02385 | 0.292955 |
| gene652 | gene652 | SACOL0655 | gi 57650036 ref NC_002951.2 :684229-685168 | MR150 | M36C05 | OK     | 277.45  | 281.006 | 0.0183744   | -0.02056    | 0.9836  | 0.999883 |
| gene653 | gene653 | SACOL0656 | gi 57650036 ref NC_002951.2 :685378-685915 | MR150 | M36C05 | OK     | 705.601 | 726.075 | 0.0412647   | -0.045462   | 0.96374 | 0.999883 |
| gene654 | gene654 | SACOL0657 | gi 57650036 ref NC_002951.2 :686083-686560 | MR150 | M36C05 | OK     | 29.8088 | 37.0659 | 0.314356    | -0.462039   | 0.64405 | 0.999883 |
| gene655 | gene655 | SACOL0658 | gi 57650036 ref NC_002951.2 :686599-687895 | MR150 | M36C05 | OK     | 54.2178 | 66.4869 | 0.294304    | -0.375202   | 0.70751 | 0.999883 |
| gene656 | gene656 | SACOL0659 | gi 57650036 ref NC_002951.2 :687922-688444 | MR150 | M36C05 | OK     | 166.779 | 139.57  | -0.256946   | 0.33804     | 0.73533 | 0.999883 |
| gene657 | gene657 | adhP      | gi 57650036 ref NC_002951.2 :688942-689953 | MR150 | M36C05 | OK     | 5.09813 | 19.3078 | 1.92114     | -2.7726     | 0.00556 | 0.115648 |
| gene658 | gene658 | SACOL0661 | gi 57650036 ref NC_002951.2 :690027-690135 | MR150 | M36C05 | NOTEST | 0       | 0       | 0           | 0           | 1       | 1        |
| gene659 | gene659 | SACOL0662 | gi 57650036 ref NC_002951.2 :690215-692302 | MR150 | M36C05 | OK     | 55.9793 | 51.4992 | -0.120344   | 0.053029    | 0.95771 | 0.999883 |
| gene66  | gene66  | SACOL0069 | gi 57650036 ref NC_002951.2 :78161-78458   | MR150 | M36C05 | OK     | 0       | 1.04359 | 1.79769e+30 | 1.79769e+30 | 0.14732 | 0.743774 |
| gene660 | gene660 | argS      | gi 57650036 ref NC_002951.2 :690215-692302 | MR150 | M36C05 | OK     | 71.4488 | 41.4644 | -0.785038   | 0.880834    | 0.37841 | 0.999883 |
| gene661 | gene661 | SACOL0664 | gi 57650036 ref NC_002951.2 :692690-693326 | MR150 | M36C05 | OK     | 8.77703 | 12.1511 | 0.469283    | -0.675795   | 0.49917 | 0.999883 |
| gene662 | gene662 | SACOL0665 | gi 57650036 ref NC_002951.2 :693704-694592 | MR150 | M36C05 | OK     | 25.5942 | 13.9469 | -0.87587    | 1.27627     | 0.20186 | 0.871284 |
| gene663 | gene663 | SACOL0666 | gi 57650036 ref NC_002951.2 :694739-695690 | MR150 | M36C05 | OK     | 18.1469 | 11.6008 | -0.645494   | 0.945734    | 0.34428 | 0.999883 |

|         |         |           |                                            |       |        |        |         |         |              |              |          |           |
|---------|---------|-----------|--------------------------------------------|-------|--------|--------|---------|---------|--------------|--------------|----------|-----------|
| gene664 | gene664 | SACOL0667 | gi 57650036 ref NC_002951.2 :695744-697248 | MR150 | M36C05 | OK     | 29.1465 | 20.7944 | -0.487131    | 0.436609     | 0.6624   | 0.999883  |
| gene665 | gene665 | SACOL0668 | gi 57650036 ref NC_002951.2 :695744-697248 | MR150 | M36C05 | OK     | 30.3159 | 28.083  | -0.110377    | 0.115727     | 0.90787  | 0.999883  |
| gene666 | gene666 | SACOL0669 | gi 57650036 ref NC_002951.2 :697383-697890 | MR150 | M36C05 | OK     | 183.374 | 269.761 | 0.556892     | -0.706414    | 0.47993  | 0.999883  |
| gene667 | gene667 | SACOL0670 | gi 57650036 ref NC_002951.2 :698051-698768 | MR150 | M36C05 | OK     | 31.0922 | 34.7876 | 0.162018     | -0.234408    | 0.81467  | 0.999883  |
| gene668 | gene668 | SACOL0671 | gi 57650036 ref NC_002951.2 :698936-699725 | MR150 | M36C05 | OK     | 79.5422 | 664.518 | 3.06252      | -3.56663     | 0.00036  | 0.015577  |
| gene669 | gene669 | sarA      | gi 57650036 ref NC_002951.2 :699975-700350 | MR150 | M36C05 | OK     | 546.26  | 5032.8  | 3.2037       | -3.54306     | 0.0004   | 0.0167391 |
| gene67  | gene67  | SACOL0070 | gi 57650036 ref NC_002951.2 :78529-80204   | MR150 | M36C05 | NOTEST | 0       | 0       | 0            | 0            | 1        | 1         |
| gene670 | gene670 | SACOL0673 | gi 57650036 ref NC_002951.2 :700497-700617 | MR150 | M36C05 | OK     | 0       | 297.145 | 1.79769e+30  | 1.79769e+30  | 0.06916  | 0.522414  |
| gene671 | gene671 | SACOL0675 | gi 57650036 ref NC_002951.2 :701297-702191 | MR150 | M36C05 | OK     | 14.1206 | 26.6988 | 0.918972     | -1.33726     | 0.18114  | 0.828669  |
| gene672 | gene672 | SACOL0676 | gi 57650036 ref NC_002951.2 :702421-702646 | MR150 | M36C05 | OK     | 3.18319 | 0       | -1.79769e+30 | -1.79769e+30 | 0.10824  | 0.653986  |
| gene673 | gene673 | SACOL0677 | gi 57650036 ref NC_002951.2 :702662-702866 | MR150 | M36C05 | OK     | 4.59906 | 6.56655 | 0.513796     | -0.338041    | 0.73533  | 0.999883  |
| gene674 | gene674 | SACOL0678 | gi 57650036 ref NC_002951.2 :703024-703585 | MR150 | M36C05 | OK     | 3.81532 | 66.0622 | 4.11395      | -5.47217     | 4.45E-08 | 8.47E-06  |
| gene675 | gene675 | SACOL0679 | gi 57650036 ref NC_002951.2 :703603-708245 | MR150 | M36C05 | OK     | 5.97971 | 59.8261 | 3.32263      | -2.82611     | 0.00471  | 0.101483  |
| gene676 | gene676 | SACOL0680 | gi 57650036 ref NC_002951.2 :703603-708245 | MR150 | M36C05 | OK     | 6.07603 | 77.0386 | 3.66438      | -1.07139     | 0.284    | 0.970845  |
| gene677 | gene677 | SACOL0681 | gi 57650036 ref NC_002951.2 :703603-708245 | MR150 | M36C05 | OK     | 6.17392 | 64.6733 | 3.38891      | -0.769998    | 0.4413   | 0.999883  |
| gene678 | gene678 | SACOL0682 | gi 57650036 ref NC_002951.2 :703603-708245 | MR150 | M36C05 | OK     | 11.9268 | 65.9499 | 2.46716      | -1.88944     | 0.05883  | 0.486046  |
| gene679 | gene679 | SACOL0684 | gi 57650036 ref NC_002951.2 :708245-709439 | MR150 | M36C05 | OK     | 3.78264 | 17.9463 | 2.24622      | -1.26342     | 0.20644  | 0.87934   |
| gene68  | gene68  | SACOL0071 | gi 57650036 ref NC_002951.2 :78529-80204   | MR150 | M36C05 | NOTEST | 0       | 0       | 0            | 0            | 1        | 1         |
| gene680 | gene680 | SACOL0685 | gi 57650036 ref NC_002951.2 :708245-709439 | MR150 | M36C05 | OK     | 12.4242 | 69.6769 | 2.48753      | -1.64521     | 0.09993  | 0.638047  |
| gene681 | gene681 | SACOL0686 | gi 57650036 ref NC_002951.2 :708245-709439 | MR150 | M36C05 | OK     | 22.4556 | 67.1851 | 1.58106      | -1.76386     | 0.07776  | 0.554398  |
| gene682 | gene682 | SACOL0687 | gi 57650036 ref NC_002951.2 :709778-711821 | MR150 | M36C05 | OK     | 58.8422 | 101.715 | 0.789611     | -0.919088    | 0.35805  | 0.999883  |
| gene683 | gene683 | SACOL0688 | gi 57650036 ref NC_002951.2 :712980-715480 | MR150 | M36C05 | OK     | 263.878 | 418.025 | 0.663718     | -0.441389    | 0.65893  | 0.999883  |
| gene684 | gene684 | SACOL0689 | gi 57650036 ref NC_002951.2 :712980-715480 | MR150 | M36C05 | OK     | 155.036 | 300.608 | 0.95528      | -0.478927    | 0.63199  | 0.999883  |
| gene685 | gene685 | SACOL0690 | gi 57650036 ref NC_002951.2 :712980-715480 | MR150 | M36C05 | OK     | 274.675 | 505.406 | 0.879715     | -0.535549    | 0.59227  | 0.999883  |
| gene686 | gene686 | sirR      | gi 57650036 ref NC_002951.2 :715601-716246 | MR150 | M36C05 | OK     | 196.072 | 137.65  | -0.510379    | 0.642427     | 0.5206   | 0.999883  |
| gene687 | gene687 | SACOL0692 | gi 57650036 ref NC_002951.2 :716325-717078 | MR150 | M36C05 | OK     | 13.0121 | 9.97527 | -0.383422    | 0.56061      | 0.57506  | 0.999883  |
| gene688 | gene688 | tagA      | gi 57650036 ref NC_002951.2 :717313-718078 | MR150 | M36C05 | OK     | 28.1815 | 18.7451 | -0.588235    | 0.858712     | 0.3905   | 0.999883  |
| gene689 | gene689 | SACOL0694 | gi 57650036 ref NC_002951.2 :718138-718933 | MR150 | M36C05 | OK     | 89.5482 | 65.8178 | -0.444186    | 0.588674     | 0.55608  | 0.999883  |
| gene69  | gene69  | SACOL0072 | gi 57650036 ref NC_002951.2 :80405-81266   | MR150 | M36C05 | NOTEST | 0       | 0       | 0            | 0            | 1        | 1         |
| gene690 | gene690 | SACOL0695 | gi 57650036 ref NC_002951.2 :719279-720092 | MR150 | M36C05 | OK     | 114.645 | 63.5226 | -0.851832    | 1.11121      | 0.26648  | 0.949974  |
| gene691 | gene691 | tagB      | gi 57650036 ref NC_002951.2 :720190-722352 | MR150 | M36C05 | OK     | 35.9134 | 37.0785 | 0.0460632    | -0.04441     | 0.96458  | 0.999883  |
| gene692 | gene692 | tagX      | gi 57650036 ref NC_002951.2 :720190-722352 | MR150 | M36C05 | OK     | 33.7541 | 26.7348 | -0.336344    | 0.287323     | 0.77387  | 0.999883  |
| gene693 | gene693 | tagD      | gi 57650036 ref NC_002951.2 :722414-722813 | MR150 | M36C05 | OK     | 44.3294 | 22.0818 | -1.0054      | 1.46294      | 0.14348  | 0.743774  |

|         |         |           |                                            |       |        |        |         |         |           |           |         |          |
|---------|---------|-----------|--------------------------------------------|-------|--------|--------|---------|---------|-----------|-----------|---------|----------|
| gene694 | gene694 | pbp4      | gi 57650036 ref NC_002951.2 :722929-724225 | MR150 | M36C05 | OK     | 19.4234 | 16.6972 | -0.218192 | 0.313058  | 0.75424 | 0.999883 |
| gene695 | gene695 | abcA      | gi 57650036 ref NC_002951.2 :724645-726373 | MR150 | M36C05 | OK     | 60.8455 | 79.9939 | 0.39474   | -0.475104 | 0.63471 | 0.999883 |
| gene696 | gene696 | SACOL0701 | gi 57650036 ref NC_002951.2 :726731-727961 | MR150 | M36C05 | OK     | 88.1715 | 58.8698 | -0.582786 | 0.732083  | 0.46412 | 0.999883 |
| gene697 | gene697 | SACOL0702 | gi 57650036 ref NC_002951.2 :728215-728308 | MR150 | M36C05 | NOTEST | 0       | 0       | 0         | 0         | 1       | 1        |
| gene698 | gene698 | SACOL0703 | gi 57650036 ref NC_002951.2 :728485-729319 | MR150 | M36C05 | OK     | 39.848  | 30.6208 | -0.379993 | 0.540398  | 0.58892 | 0.999883 |
| gene699 | gene699 | SACOL0704 | gi 57650036 ref NC_002951.2 :729600-730398 | MR150 | M36C05 | OK     | 35.5885 | 53.3121 | 0.583052  | -0.817003 | 0.41393 | 0.999883 |
| gene7   | gene7   | hutH      | gi 57650036 ref NC_002951.2 :10919-12434   | MR150 | M36C05 | OK     | 37.6203 | 9.38816 | -2.0026   | 2.77057   | 0.0056  | 0.116038 |
| gene70  | gene70  | SACOL0073 | gi 57650036 ref NC_002951.2 :81620-82154   | MR150 | M36C05 | NOTEST | 0       | 0       | 0         | 0         | 1       | 1        |
| gene700 | gene700 | SACOL0705 | gi 57650036 ref NC_002951.2 :730433-732451 | MR150 | M36C05 | OK     | 11.794  | 15.0683 | 0.353463  | -0.239035 | 0.81108 | 0.999883 |
| gene701 | gene701 | SACOL0706 | gi 57650036 ref NC_002951.2 :730433-732451 | MR150 | M36C05 | OK     | 40.1108 | 35.2273 | -0.187294 | 0.215247  | 0.82958 | 0.999883 |
| gene702 | gene702 | SACOL0707 | gi 57650036 ref NC_002951.2 :732687-733653 | MR150 | M36C05 | OK     | 26.3877 | 35.8478 | 0.44202   | -0.625307 | 0.53177 | 0.999883 |
| gene703 | gene703 | SACOL0708 | gi 57650036 ref NC_002951.2 :733694-734634 | MR150 | M36C05 | OK     | 42.934  | 58.7835 | 0.453292  | -0.568169 | 0.56992 | 0.999883 |
| gene704 | gene704 | SACOL0709 | gi 57650036 ref NC_002951.2 :733694-734634 | MR150 | M36C05 | OK     | 21.2521 | 42.7183 | 1.00725   | -0.639583 | 0.52244 | 0.999883 |
| gene705 | gene705 | SACOL0710 | gi 57650036 ref NC_002951.2 :734749-735247 | MR150 | M36C05 | OK     | 480.443 | 408.333 | -0.234621 | 0.27542   | 0.78299 | 0.999883 |
| gene706 | gene706 | SACOL0711 | gi 57650036 ref NC_002951.2 :735702-736770 | MR150 | M36C05 | OK     | 346.147 | 75.0762 | -2.20496  | 2.56903   | 0.0102  | 0.17006  |
| gene707 | gene707 | SACOL0712 | gi 57650036 ref NC_002951.2 :736920-737964 | MR150 | M36C05 | OK     | 31.5706 | 8.23086 | -1.93947  | 2.77861   | 0.00546 | 0.114185 |
| gene708 | gene708 | SACOL0713 | gi 57650036 ref NC_002951.2 :738292-738721 | MR150 | M36C05 | OK     | 115.957 | 40.4293 | -1.52012  | 2.18038   | 0.02923 | 0.32476  |
| gene709 | gene709 | SACOL0714 | gi 57650036 ref NC_002951.2 :738929-739436 | MR150 | M36C05 | OK     | 173.906 | 237.749 | 0.451131  | -0.578309 | 0.56306 | 0.999883 |
| gene71  | gene71  | SACOL0074 | gi 57650036 ref NC_002951.2 :82253-82988   | MR150 | M36C05 | NOTEST | 0       | 0       | 0         | 0         | 1       | 1        |
| gene710 | gene710 | SACOL0715 | gi 57650036 ref NC_002951.2 :739548-740472 | MR150 | M36C05 | OK     | 35.5316 | 32.903  | -0.110882 | 0.15638   | 0.87573 | 0.999883 |
| gene711 | gene711 | SACOL0716 | gi 57650036 ref NC_002951.2 :740478-742195 | MR150 | M36C05 | OK     | 21.824  | 18.4678 | -0.240903 | 0.15892   | 0.87373 | 0.999883 |
| gene712 | gene712 | SACOL0717 | gi 57650036 ref NC_002951.2 :740478-742195 | MR150 | M36C05 | OK     | 43.7009 | 29.632  | -0.560507 | 0.654924  | 0.51252 | 0.999883 |
| gene713 | gene713 | SACOL0718 | gi 57650036 ref NC_002951.2 :742338-744979 | MR150 | M36C05 | OK     | 292.036 | 192.576 | -0.600721 | 0.343936  | 0.73089 | 0.999883 |
| gene714 | gene714 | SACOL0720 | gi 57650036 ref NC_002951.2 :742338-744979 | MR150 | M36C05 | OK     | 294.92  | 105.581 | -1.48197  | 1.28215   | 0.19979 | 0.867353 |
| gene715 | gene715 | SACOL0721 | gi 57650036 ref NC_002951.2 :745703-746321 | MR150 | M36C05 | OK     | 58.2235 | 43.0435 | -0.435805 | 0.622115  | 0.53387 | 0.999883 |
| gene716 | gene716 | SACOL0722 | gi 57650036 ref NC_002951.2 :746336-747344 | MR150 | M36C05 | OK     | 71.2597 | 37.2579 | -0.935541 | 1.25082   | 0.211   | 0.889865 |
| gene717 | gene717 | SACOL0723 | gi 57650036 ref NC_002951.2 :747931-748729 | MR150 | M36C05 | OK     | 1697.49 | 2444.98 | 0.526414  | -0.540514 | 0.58884 | 0.999883 |
| gene718 | gene718 | SACOL0724 | gi 57650036 ref NC_002951.2 :749089-749734 | MR150 | M36C05 | OK     | 31.6468 | 22.3217 | -0.503614 | 0.737243  | 0.46098 | 0.999883 |
| gene719 | gene719 | SACOL0725 | gi 57650036 ref NC_002951.2 :750430-752581 | MR150 | M36C05 | OK     | 6.98745 | 4.91426 | -0.507794 | 0.743888  | 0.45694 | 0.999883 |
| gene72  | gene72  | SACOL0075 | gi 57650036 ref NC_002951.2 :83421-84024   | MR150 | M36C05 | OK     | 20.5093 | 10.9568 | -0.904456 | 1.31594   | 0.18819 | 0.84541  |
| gene720 | gene720 | sarX      | gi 57650036 ref NC_002951.2 :752660-753086 | MR150 | M36C05 | OK     | 22.9539 | 10.7269 | -1.09751  | 1.54487   | 0.12238 | 0.695722 |
| gene721 | gene721 | SACOL0727 | gi 57650036 ref NC_002951.2 :753275-754465 | MR150 | M36C05 | OK     | 61.8883 | 56.9833 | -0.119128 | 0.135136  | 0.8925  | 0.999883 |
| gene722 | gene722 | SACOL0728 | gi 57650036 ref NC_002951.2 :753275-754465 | MR150 | M36C05 | OK     | 50.7799 | 35.8585 | -0.501944 | 0.351124  | 0.7255  | 0.999883 |



|         |         |           |                                            |       |        |    |         |         |             |             |          |           |
|---------|---------|-----------|--------------------------------------------|-------|--------|----|---------|---------|-------------|-------------|----------|-----------|
| gene723 | gene723 | SACOL0730 | gi 57650036 ref NC_002951.2 :754817-755462 | MR150 | M36C05 | OK | 40.5904 | 72.6694 | 0.840208    | -1.18224    | 0.23711  | 0.906613  |
| gene724 | gene724 | SACOL0731 | gi 57650036 ref NC_002951.2 :755577-756444 | MR150 | M36C05 | OK | 42.9279 | 60.6882 | 0.4995      | -0.682179   | 0.49513  | 0.999883  |
| gene725 | gene725 | SACOL0733 | gi 57650036 ref NC_002951.2 :756782-758488 | MR150 | M36C05 | OK | 24.8996 | 12.0938 | -1.04185    | 1.19418     | 0.23241  | 0.902162  |
| gene726 | gene726 | SACOL0734 | gi 57650036 ref NC_002951.2 :756782-758488 | MR150 | M36C05 | OK | 51.3337 | 14.9003 | -1.78456    | 1.37848     | 0.16805  | 0.807039  |
| gene727 | gene727 | SACOL0735 | gi 57650036 ref NC_002951.2 :758586-759276 | MR150 | M36C05 | OK | 17.4955 | 16.4397 | -0.0898043  | 0.13204     | 0.89495  | 0.999883  |
| gene728 | gene728 | SACOL0736 | gi 57650036 ref NC_002951.2 :759402-759846 | MR150 | M36C05 | OK | 0       | 1.80831 | 1.79769e+30 | 1.79769e+30 | 0.02434  | 0.296308  |
| gene729 | gene729 | SACOL0737 | gi 57650036 ref NC_002951.2 :759912-760308 | MR150 | M36C05 | OK | 17.0633 | 21.288  | 0.319145    | -0.454386   | 0.64955  | 0.999883  |
| gene73  | gene73  | SACOL0076 | gi 57650036 ref NC_002951.2 :84290-87443   | MR150 | M36C05 | OK | 10.738  | 10.6344 | -0.0139835  | 0.01926     | 0.98463  | 0.999883  |
| gene730 | gene730 | SACOL0738 | gi 57650036 ref NC_002951.2 :760445-760745 | MR150 | M36C05 | OK | 55.1378 | 222.143 | 2.01037     | -2.88876    | 0.00387  | 0.0917722 |
| gene731 | gene731 | SACOL0739 | gi 57650036 ref NC_002951.2 :760824-761367 | MR150 | M36C05 | OK | 6.69194 | 14.808  | 1.14589     | -1.60658    | 0.10815  | 0.653986  |
| gene732 | gene732 | SACOL0740 | gi 57650036 ref NC_002951.2 :761462-762029 | MR150 | M36C05 | OK | 10.8421 | 38.8079 | 1.8397      | -2.65649    | 0.0079   | 0.14471   |
| gene733 | gene733 | SACOL0741 | gi 57650036 ref NC_002951.2 :762030-762489 | MR150 | M36C05 | OK | 8.2614  | 23.8622 | 1.53027     | -2.14323    | 0.03209  | 0.3441    |
| gene734 | gene734 | SACOL0742 | gi 57650036 ref NC_002951.2 :762491-763175 | MR150 | M36C05 | OK | 18.6611 | 170.086 | 3.18816     | -4.27873    | 1.88E-05 | 0.001362  |
| gene735 | gene735 | uppP      | gi 57650036 ref NC_002951.2 :763346-764222 | MR150 | M36C05 | OK | 25.5952 | 14.1948 | -0.850513   | 1.23986     | 0.21503  | 0.89416   |
| gene736 | gene736 | SACOL0744 | gi 57650036 ref NC_002951.2 :764440-767742 | MR150 | M36C05 | OK | 18.9315 | 56.0342 | 1.56552     | -1.3906     | 0.16435  | 0.794505  |
| gene737 | gene737 | SACOL0745 | gi 57650036 ref NC_002951.2 :764440-767742 | MR150 | M36C05 | OK | 23.1722 | 33.4995 | 0.531747    | -0.435452   | 0.66323  | 0.999883  |
| gene738 | gene738 | norR      | gi 57650036 ref NC_002951.2 :767868-768312 | MR150 | M36C05 | OK | 740.567 | 763.56  | 0.0441112   | -0.049951   | 0.96016  | 0.999883  |
| gene739 | gene739 | SACOL0747 | gi 57650036 ref NC_002951.2 :768538-769465 | MR150 | M36C05 | OK | 12.8481 | 15.9284 | 0.310045    | -0.455254   | 0.64893  | 0.999883  |
| gene74  | gene74  | SACOL0077 | gi 57650036 ref NC_002951.2 :87499-87982   | MR150 | M36C05 | OK | 29.7207 | 24.9688 | -0.251343   | 0.3692      | 0.71198  | 0.999883  |
| gene740 | gene740 | SACOL0748 | gi 57650036 ref NC_002951.2 :769567-770476 | MR150 | M36C05 | OK | 46.2175 | 49.4666 | 0.0980156   | -0.133988   | 0.89341  | 0.999883  |
| gene741 | gene741 | SACOL0749 | gi 57650036 ref NC_002951.2 :770510-770798 | MR150 | M36C05 | OK | 92.1493 | 65.1883 | -0.499359   | 0.732658    | 0.46377  | 0.999883  |
| gene742 | gene742 | SACOL0750 | gi 57650036 ref NC_002951.2 :771080-772634 | MR150 | M36C05 | OK | 19.4562 | 31.1789 | 0.680335    | -0.930627   | 0.35205  | 0.999883  |
| gene743 | gene743 | SACOL0751 | gi 57650036 ref NC_002951.2 :772719-774093 | MR150 | M36C05 | OK | 27.787  | 40.2821 | 0.535726    | -0.721032   | 0.47089  | 0.999883  |
| gene744 | gene744 | SACOL0752 | gi 57650036 ref NC_002951.2 :774528-775146 | MR150 | M36C05 | OK | 34.7876 | 100.347 | 1.52835     | -2.12879    | 0.03327  | 0.349475  |
| gene745 | gene745 | SACOL0753 | gi 57650036 ref NC_002951.2 :775331-775754 | MR150 | M36C05 | OK | 79.3473 | 137.834 | 0.79668     | -1.12443    | 0.26083  | 0.940988  |
| gene746 | gene746 | norA      | gi 57650036 ref NC_002951.2 :775962-777129 | MR150 | M36C05 | OK | 20.7465 | 50.5089 | 1.28367     | -1.7606     | 0.07831  | 0.55661   |
| gene747 | gene747 | SACOL0755 | gi 57650036 ref NC_002951.2 :777421-777874 | MR150 | M36C05 | OK | 1934.51 | 2494.29 | 0.366656    | -0.378228   | 0.70526  | 0.999883  |
| gene748 | gene748 | SACOL0756 | gi 57650036 ref NC_002951.2 :778047-778530 | MR150 | M36C05 | OK | 7.56527 | 10.1436 | 0.423102    | -0.578842   | 0.5627   | 0.999883  |
| gene749 | gene749 | SACOL0757 | gi 57650036 ref NC_002951.2 :778779-780461 | MR150 | M36C05 | OK | 1.08391 | 4.68628 | 2.1122      | -1.70154    | 0.08884  | 0.597944  |
| gene75  | gene75  | plc       | gi 57650036 ref NC_002951.2 :88186-89173   | MR150 | M36C05 | OK | 0.7783  | 1.40121 | 0.848278    | -0.953056   | 0.34056  | 0.999883  |
| gene750 | gene750 | fruK      | gi 57650036 ref NC_002951.2 :778779-780461 | MR150 | M36C05 | OK | 1.91139 | 5.65964 | 1.56609     | -1.75986    | 0.07843  | 0.55661   |
| gene751 | gene751 | SACOL0759 | gi 57650036 ref NC_002951.2 :780466-782424 | MR150 | M36C05 | OK | 6.70886 | 8.65121 | 0.366834    | -0.535495   | 0.59231  | 0.999883  |
| gene752 | gene752 | nagA      | gi 57650036 ref NC_002951.2 :782731-783913 | MR150 | M36C05 | OK | 14.6595 | 11.3395 | -0.370478   | 0.5417      | 0.58803  | 0.999883  |

|         |         |             |                                            |       |        |        |         |         |           |           |          |           |
|---------|---------|-------------|--------------------------------------------|-------|--------|--------|---------|---------|-----------|-----------|----------|-----------|
| gene753 | gene753 | SACOL0762   | gi 57650036 ref NC_002951.2 :784133-785483 | MR150 | M36C05 | OK     | 139.836 | 257.956 | 0.883387  | -0.982774 | 0.32572  | 0.999883  |
| gene754 | gene754 | SACOL0763   | gi 57650036 ref NC_002951.2 :785704-786544 | MR150 | M36C05 | OK     | 26.7949 | 99.4452 | 1.89194   | -2.56502  | 0.01032  | 0.171267  |
| gene755 | gene755 | SACOL0764   | gi 57650036 ref NC_002951.2 :786675-787659 | MR150 | M36C05 | OK     | 49.6111 | 172.447 | 1.79742   | -2.24627  | 0.02469  | 0.298259  |
| gene756 | gene756 | saeS        | gi 57650036 ref NC_002951.2 :787730-789920 | MR150 | M36C05 | OK     | 128.985 | 237.277 | 0.879369  | -0.669956 | 0.50289  | 0.999883  |
| gene757 | gene757 | saeR        | gi 57650036 ref NC_002951.2 :787730-789920 | MR150 | M36C05 | OK     | 146.484 | 321.759 | 1.13524   | -0.728617 | 0.46624  | 0.999883  |
| gene758 | gene758 | SACOL0767   | gi 57650036 ref NC_002951.2 :787730-789920 | MR150 | M36C05 | OK     | 109.93  | 233.684 | 1.08797   | -0.450027 | 0.65269  | 0.999883  |
| gene759 | gene759 | SACOL0768   | gi 57650036 ref NC_002951.2 :790261-790702 | MR150 | M36C05 | OK     | 257.284 | 368.861 | 0.519716  | -0.652893 | 0.51383  | 0.999883  |
| gene76  | gene76  | SACOL0079   | gi 57650036 ref NC_002951.2 :89393-90164   | MR150 | M36C05 | OK     | 0.53626 | 1.35245 | 1.33456   | -1.28263  | 0.19962  | 0.867146  |
| gene760 | gene760 | SACOL0769   | gi 57650036 ref NC_002951.2 :790981-791566 | MR150 | M36C05 | OK     | 73.1468 | 28.3881 | -1.36551  | 1.95143   | 0.05101  | 0.444597  |
| gene761 | gene761 | SACOL0770   | gi 57650036 ref NC_002951.2 :791664-792378 | MR150 | M36C05 | OK     | 41.9959 | 24.0429 | -0.804641 | 1.16259   | 0.245    | 0.919152  |
| gene762 | gene762 | SACOL0771   | gi 57650036 ref NC_002951.2 :792381-792801 | MR150 | M36C05 | OK     | 32.579  | 10.5134 | -1.63172  | 2.30111   | 0.02139  | 0.273585  |
| gene763 | gene763 | SACOL0772   | gi 57650036 ref NC_002951.2 :792802-793471 | MR150 | M36C05 | OK     | 32.9662 | 7.0591  | -2.22343  | 3.18165   | 0.00146  | 0.0454837 |
| gene764 | gene764 | pabA        | gi 57650036 ref NC_002951.2 :793821-796158 | MR150 | M36C05 | OK     | 4.27314 | 2.52169 | -0.760907 | 0.426072  | 0.67006  | 0.999883  |
| gene765 | gene765 | SACOL0774   | gi 57650036 ref NC_002951.2 :793821-796158 | MR150 | M36C05 | OK     | 6.18559 | 3.74451 | -0.724134 | 0.980708  | 0.32674  | 0.999883  |
| gene766 | gene766 | SACOL0776   | gi 57650036 ref NC_002951.2 :796517-798216 | MR150 | M36C05 | OK     | 10.4857 | 12.3081 | 0.231183  | -0.189198 | 0.84994  | 0.999883  |
| gene767 | gene767 | SACOL0777   | gi 57650036 ref NC_002951.2 :796517-798216 | MR150 | M36C05 | OK     | 18.2617 | 11.3697 | -0.683624 | 0.799348  | 0.42409  | 0.999883  |
| gene768 | gene768 | SACOL0778   | gi 57650036 ref NC_002951.2 :798689-800630 | MR150 | M36C05 | OK     | 333.263 | 143.127 | -1.21937  | 1.29487   | 0.19537  | 0.857922  |
| gene769 | gene769 | SACOL0779   | gi 57650036 ref NC_002951.2 :800906-802784 | MR150 | M36C05 | OK     | 40.5288 | 36.978  | -0.13228  | 0.168937  | 0.86585  | 0.999883  |
| gene77  | gene77  | SACOL0080   | gi 57650036 ref NC_002951.2 :90215-90986   | MR150 | M36C05 | NOTEST | 0.80439 | 0.57962 | -0.472791 | 0.439282  | 0.66046  | 1         |
| gene770 | gene770 | recQ1       | gi 57650036 ref NC_002951.2 :802795-804577 | MR150 | M36C05 | OK     | 55.0899 | 43.9606 | -0.325579 | 0.406967  | 0.68403  | 0.999883  |
| gene771 | gene771 | SACOL0781   | gi 57650036 ref NC_002951.2 :804798-807283 | MR150 | M36C05 | OK     | 24.0126 | 104.182 | 2.11724   | -1.56264  | 0.11814  | 0.68227   |
| gene772 | gene772 | opuBB       | gi 57650036 ref NC_002951.2 :804798-807283 | MR150 | M36C05 | OK     | 26.9049 | 91.0316 | 1.7585    | -1.66476  | 0.09596  | 0.622731  |
| gene773 | gene773 | hisC        | gi 57650036 ref NC_002951.2 :807522-808581 | MR150 | M36C05 | OK     | 9.27021 | 47.8801 | 2.36875   | -3.31679  | 0.00091  | 0.0323038 |
| gene774 | gene774 | SACOL0785   | gi 57650036 ref NC_002951.2 :808931-809474 | MR150 | M36C05 | OK     | 35.2442 | 61.4856 | 0.802862  | -1.16145  | 0.24546  | 0.919205  |
| gene775 | gene775 | SACOL0786   | gi 57650036 ref NC_002951.2 :809586-809748 | MR150 | M36C05 | OK     | 75.521  | 560.512 | 2.89179   | -3.62253  | 0.00029  | 0.0131134 |
| gene776 | gene776 | SACOL0787   | gi 57650036 ref NC_002951.2 :810153-811071 | MR150 | M36C05 | OK     | 30.9233 | 320.723 | 3.37456   | -4.1698   | 3.05E-05 | 0.0020429 |
| gene777 | gene777 | SACOL0788   | gi 57650036 ref NC_002951.2 :811340-812846 | MR150 | M36C05 | OK     | 152.691 | 56.7174 | -1.42875  | 1.6925    | 0.09055  | 0.603975  |
| gene778 | gene778 | SACOL0789   | gi 57650036 ref NC_002951.2 :813186-813687 | MR150 | M36C05 | OK     | 39.1312 | 12.106  | -1.6926   | 2.44214   | 0.0146   | 0.20965   |
| gene779 | gene779 | SACOL0790   | gi 57650036 ref NC_002951.2 :813706-814573 | MR150 | M36C05 | OK     | 30.7612 | 10.5832 | -1.53933  | 2.23076   | 0.0257   | 0.304771  |
| gene78  | gene78  | SACOL0081   | gi 57650036 ref NC_002951.2 :91049-91214   | MR150 | M36C05 | NOTEST | 0       | 0       | 0         | 0         | 1        | 1         |
| gene780 | gene780 | SACOL0790.1 | gi 57650036 ref NC_002951.2 :814957-815224 | MR150 | M36C05 | OK     | 358.806 | 162.198 | -1.14545  | 1.63128   | 0.10283  | 0.643766  |
| gene781 | gene781 | nrdI        | gi 57650036 ref NC_002951.2 :815373-817840 | MR150 | M36C05 | OK     | 727.613 | 636.509 | -0.19299  | 0.070563  | 0.94375  | 0.999883  |
| gene782 | gene782 | nrdE        | gi 57650036 ref NC_002951.2 :815373-817840 | MR150 | M36C05 | OK     | 605.703 | 384.04  | -0.657355 | 0.627198  | 0.53053  | 0.999883  |

|         |         |           |                                            |       |        |        |         |         |             |             |         |          |
|---------|---------|-----------|--------------------------------------------|-------|--------|--------|---------|---------|-------------|-------------|---------|----------|
| gene783 | gene783 | nrdF      | gi 57650036 ref NC_002951.2 :817957-818929 | MR150 | M36C05 | OK     | 1092.53 | 284.551 | -1.94092    | 2.06353     | 0.03906 | 0.38357  |
| gene784 | gene784 | SACOL0794 | gi 57650036 ref NC_002951.2 :819061-819166 | MR150 | M36C05 | NOTEST | 0       | 0       | 0           | 0           | 1       | 1        |
| gene785 | gene785 | SACOL0796 | gi 57650036 ref NC_002951.2 :819636-822309 | MR150 | M36C05 | OK     | 1.58683 | 1.28562 | -0.303681   | 0.265278    | 0.7908  | 0.999883 |
| gene786 | gene786 | SACOL0797 | gi 57650036 ref NC_002951.2 :819636-822309 | MR150 | M36C05 | OK     | 1.21369 | 1.74817 | 0.52644     | -0.464987   | 0.64194 | 0.999883 |
| gene787 | gene787 | SACOL0798 | gi 57650036 ref NC_002951.2 :819636-822309 | MR150 | M36C05 | NOTEST | 0.54484 | 0.98153 | 0.849187    | -0.446907   | 0.65494 | 1        |
| gene788 | gene788 | SACOL0799 | gi 57650036 ref NC_002951.2 :822427-823456 | MR150 | M36C05 | OK     | 2.95555 | 3.19236 | 0.111197    | -0.152778   | 0.87857 | 0.999883 |
| gene789 | gene789 | SACOL0800 | gi 57650036 ref NC_002951.2 :823772-824087 | MR150 | M36C05 | OK     | 10.0812 | 13.6461 | 0.436831    | -0.551865   | 0.58104 | 0.999883 |
| gene79  | gene79  | SACOL0082 | gi 57650036 ref NC_002951.2 :91226-91823   | MR150 | M36C05 | NOTEST | 0       | 0.55613 | 1.79769e+30 | 1.79769e+30 | 0.06916 | 1        |
| gene790 | gene790 | murB      | gi 57650036 ref NC_002951.2 :824104-825028 | MR150 | M36C05 | OK     | 23.4762 | 21.6307 | -0.118121   | 0.171225    | 0.86405 | 0.999883 |
| gene791 | gene791 | SACOL0802 | gi 57650036 ref NC_002951.2 :825154-825673 | MR150 | M36C05 | OK     | 13.4291 | 13.846  | 0.0441116   | -0.06347    | 0.94939 | 0.999883 |
| gene792 | gene792 | SACOL0803 | gi 57650036 ref NC_002951.2 :825792-826671 | MR150 | M36C05 | OK     | 19.6191 | 13.9696 | -0.489968   | 0.718063    | 0.47272 | 0.999883 |
| gene793 | gene793 | SACOL0804 | gi 57650036 ref NC_002951.2 :826824-827145 | MR150 | M36C05 | OK     | 76.034  | 232.721 | 1.61388     | -2.30284    | 0.02129 | 0.273297 |
| gene794 | gene794 | SACOL0805 | gi 57650036 ref NC_002951.2 :827569-828694 | MR150 | M36C05 | OK     | 43.7074 | 45.5334 | 0.059046    | -0.079063   | 0.93698 | 0.999883 |
| gene795 | gene795 | pepT      | gi 57650036 ref NC_002951.2 :828882-830109 | MR150 | M36C05 | OK     | 92.157  | 100.157 | 0.12009     | -0.145912   | 0.88399 | 0.999883 |
| gene796 | gene796 | SACOL0807 | gi 57650036 ref NC_002951.2 :830122-830617 | MR150 | M36C05 | OK     | 17.6288 | 12.7263 | -0.470124   | 0.676205    | 0.49891 | 0.999883 |
| gene797 | gene797 | SACOL0808 | gi 57650036 ref NC_002951.2 :830634-831396 | MR150 | M36C05 | OK     | 8.7175  | 8.83375 | 0.0191119   | -0.027693   | 0.97791 | 0.999883 |
| gene798 | gene798 | SACOL0809 | gi 57650036 ref NC_002951.2 :831591-832662 | MR150 | M36C05 | OK     | 25.3178 | 22.0275 | -0.20085    | 0.287414    | 0.7738  | 0.999883 |
| gene799 | gene799 | SACOL0810 | gi 57650036 ref NC_002951.2 :832979-834035 | MR150 | M36C05 | OK     | 17.7109 | 11.3357 | -0.643758   | 0.941186    | 0.34661 | 0.999883 |
| gene8   | gene8   | serS      | gi 57650036 ref NC_002951.2 :12812-14099   | MR150 | M36C05 | OK     | 42.2679 | 57.0988 | 0.433896    | -0.565662   | 0.57162 | 0.999883 |
| gene80  | gene80  | SACOL0083 | gi 57650036 ref NC_002951.2 :91889-92657   | MR150 | M36C05 | NOTEST | 0.26955 | 0.38846 | 0.527225    | -0.346877   | 0.72868 | 1        |
| gene800 | gene800 | SACOL0811 | gi 57650036 ref NC_002951.2 :834204-834846 | MR150 | M36C05 | OK     | 92.121  | 93.8891 | 0.0274282   | -0.036742   | 0.97069 | 0.999883 |
| gene801 | gene801 | SACOL0812 | gi 57650036 ref NC_002951.2 :834989-835856 | MR150 | M36C05 | OK     | 103.303 | 45.9709 | -1.16808    | 1.5435      | 0.12271 | 0.695963 |
| gene802 | gene802 | SACOL0813 | gi 57650036 ref NC_002951.2 :836219-837969 | MR150 | M36C05 | OK     | 1.38744 | 2.49745 | 0.848031    | -0.872464   | 0.38296 | 0.999883 |
| gene803 | gene803 | SACOL0814 | gi 57650036 ref NC_002951.2 :836219-837969 | MR150 | M36C05 | OK     | 2.57823 | 2.78791 | 0.112804    | -0.102353   | 0.91848 | 0.999883 |
| gene804 | gene804 | SACOL0815 | gi 57650036 ref NC_002951.2 :838029-838602 | MR150 | M36C05 | OK     | 949.863 | 1142.22 | 0.266055    | -0.280387   | 0.77918 | 0.999883 |
| gene805 | gene805 | secA      | gi 57650036 ref NC_002951.2 :839015-841547 | MR150 | M36C05 | OK     | 140.765 | 81.2764 | -0.792377   | 0.869886    | 0.38436 | 0.999883 |
| gene806 | gene806 | SACOL0817 | gi 57650036 ref NC_002951.2 :841588-841693 | MR150 | M36C05 | NOTEST | 0       | 0       | 0           | 0           | 1       | 1        |
| gene807 | gene807 | prfB      | gi 57650036 ref NC_002951.2 :841861-842972 | MR150 | M36C05 | OK     | 44.2107 | 27.9581 | -0.661129   | 0.908029    | 0.36386 | 0.999883 |
| gene808 | gene808 | SACOL0819 | gi 57650036 ref NC_002951.2 :843125-843233 | MR150 | M36C05 | NOTEST | 0       | 0       | 0           | 0           | 1       | 1        |
| gene809 | gene809 | SACOL0820 | gi 57650036 ref NC_002951.2 :843380-844220 | MR150 | M36C05 | OK     | 4.06708 | 8.78978 | 1.11183     | -1.57417    | 0.11545 | 0.671711 |
| gene81  | gene81  | SACOL0084 | gi 57650036 ref NC_002951.2 :92789-94988   | MR150 | M36C05 | OK     | 14.4057 | 20.563  | 0.513417    | -0.700393   | 0.48368 | 0.999883 |
| gene810 | gene810 | SACOL0821 | gi 57650036 ref NC_002951.2 :844393-845277 | MR150 | M36C05 | OK     | 17.3101 | 20.5559 | 0.247934    | -0.344854   | 0.7302  | 0.999883 |
| gene811 | gene811 | SACOL0822 | gi 57650036 ref NC_002951.2 :844393-845277 | MR150 | M36C05 | OK     | 18.7853 | 15.3695 | -0.289531   | 0.135011    | 0.8926  | 0.999883 |

|         |         |             |                                            |       |        |        |         |         |            |           |          |           |
|---------|---------|-------------|--------------------------------------------|-------|--------|--------|---------|---------|------------|-----------|----------|-----------|
| gene812 | gene812 | uvrB        | gi 57650036 ref NC_002951.2 :845539-847531 | MR150 | M36C05 | OK     | 64.9612 | 55.6574 | -0.223005  | 0.26808   | 0.78864  | 0.999883  |
| gene813 | gene813 | uvrA        | gi 57650036 ref NC_002951.2 :847538-850385 | MR150 | M36C05 | OK     | 70.4279 | 43.0439 | -0.710338  | 0.824765  | 0.40951  | 0.999883  |
| gene814 | gene814 | hprK        | gi 57650036 ref NC_002951.2 :850991-851924 | MR150 | M36C05 | OK     | 61.835  | 118.71  | 0.940945   | -1.20209  | 0.22933  | 0.898537  |
| gene815 | gene815 | lgt         | gi 57650036 ref NC_002951.2 :851929-852769 | MR150 | M36C05 | OK     | 43.3025 | 60.8391 | 0.49055    | -0.672414 | 0.50132  | 0.999883  |
| gene816 | gene816 | SACOL0827   | gi 57650036 ref NC_002951.2 :852776-853262 | MR150 | M36C05 | OK     | 35.8274 | 38.6057 | 0.10775    | -0.158225 | 0.87428  | 0.999883  |
| gene817 | gene817 | SACOL0828   | gi 57650036 ref NC_002951.2 :853269-854709 | MR150 | M36C05 | OK     | 41.6242 | 20.8906 | -0.994567  | 1.34711   | 0.17794  | 0.821737  |
| gene818 | gene818 | trxB        | gi 57650036 ref NC_002951.2 :854775-855711 | MR150 | M36C05 | OK     | 259.647 | 562.957 | 1.11647    | -1.21231  | 0.22539  | 0.89446   |
| gene819 | gene819 | SACOL0830   | gi 57650036 ref NC_002951.2 :856420-858324 | MR150 | M36C05 | OK     | 38.7108 | 79.6181 | 1.04036    | -0.636901 | 0.52419  | 0.999883  |
| gene82  | gene82  | SACOL0085   | gi 57650036 ref NC_002951.2 :95138-96317   | MR150 | M36C05 | OK     | 3.59789 | 9.79766 | 1.44529    | -2.08578  | 0.037    | 0.369812  |
| gene820 | gene820 | SACOL0831   | gi 57650036 ref NC_002951.2 :856420-858324 | MR150 | M36C05 | OK     | 48.6712 | 256.844 | 2.39976    | -2.32924  | 0.01985  | 0.260196  |
| gene821 | gene821 | SACOL0832   | gi 57650036 ref NC_002951.2 :858433-859378 | MR150 | M36C05 | OK     | 55.0844 | 225.301 | 2.03214    | -2.49923  | 0.01245  | 0.191645  |
| gene823 | gene823 | clpP        | gi 57650036 ref NC_002951.2 :859950-860538 | MR150 | M36C05 | OK     | 560.932 | 633.075 | 0.17455    | -0.193108 | 0.84687  | 0.999883  |
| gene824 | gene824 | SACOL0834   | gi 57650036 ref NC_002951.2 :860780-861683 | MR150 | M36C05 | OK     | 19.3853 | 112.016 | 2.53067    | -3.3962   | 0.00068  | 0.0257547 |
| gene825 | gene825 | SACOL0835   | gi 57650036 ref NC_002951.2 :862386-863016 | MR150 | M36C05 | OK     | 26.6982 | 221.264 | 3.05096    | -4.04803  | 5.17E-05 | 0.0033079 |
| gene826 | gene826 | SACOL0836   | gi 57650036 ref NC_002951.2 :863204-863351 | MR150 | M36C05 | NOTEST | 0       | 0       | 0          | 0         | 1        | 1         |
| gene827 | gene827 | gapR        | gi 57650036 ref NC_002951.2 :863775-864789 | MR150 | M36C05 | OK     | 70.9228 | 359.669 | 2.34235    | -2.74848  | 0.00599  | 0.120361  |
| gene828 | gene828 | gapA1       | gi 57650036 ref NC_002951.2 :864841-865852 | MR150 | M36C05 | OK     | 246.598 | 1562.03 | 2.66318    | -2.85104  | 0.00436  | 0.0979401 |
| gene829 | gene829 | pgk         | gi 57650036 ref NC_002951.2 :865990-867181 | MR150 | M36C05 | OK     | 57.9512 | 317.513 | 2.45391    | -2.86826  | 0.00413  | 0.0948257 |
| gene83  | gene83  | SACOL0086   | gi 57650036 ref NC_002951.2 :96318-97707   | MR150 | M36C05 | OK     | 2.83383 | 8.34409 | 1.558      | -2.24387  | 0.02484  | 0.299551  |
| gene830 | gene830 | tpiA        | gi 57650036 ref NC_002951.2 :867302-868064 | MR150 | M36C05 | OK     | 87.175  | 403.604 | 2.21096    | -2.65099  | 0.00803  | 0.144841  |
| gene831 | gene831 | pgm         | gi 57650036 ref NC_002951.2 :868066-869584 | MR150 | M36C05 | OK     | 69.0267 | 292.043 | 2.08095    | -2.35327  | 0.01861  | 0.247561  |
| gene832 | gene832 | eno         | gi 57650036 ref NC_002951.2 :869713-871018 | MR150 | M36C05 | OK     | 276.366 | 425.4   | 0.622239   | -0.658137 | 0.51045  | 0.999883  |
| gene833 | gene833 | SACOL0843   | gi 57650036 ref NC_002951.2 :871357-871816 | MR150 | M36C05 | OK     | 45.4377 | 46.0199 | 0.0183686  | -0.026919 | 0.97852  | 0.999883  |
| gene834 | gene834 | secG        | gi 57650036 ref NC_002951.2 :871882-872116 | MR150 | M36C05 | OK     | 1372.25 | 436.036 | -1.65403   | 2.19619   | 0.02808  | 0.31701   |
| gene835 | gene835 | est         | gi 57650036 ref NC_002951.2 :872231-872972 | MR150 | M36C05 | OK     | 31.4118 | 31.8143 | 0.0183686  | -0.026571 | 0.9788   | 0.999883  |
| gene836 | gene836 | SACOL0846   | gi 57650036 ref NC_002951.2 :873005-875378 | MR150 | M36C05 | OK     | 66.0503 | 91.8913 | 0.476364   | -0.544103 | 0.58637  | 0.999883  |
| gene837 | gene837 | smpB        | gi 57650036 ref NC_002951.2 :875399-875864 | MR150 | M36C05 | OK     | 99.7936 | 119.125 | 0.255456   | -0.354923 | 0.72265  | 0.999883  |
| gene838 | gene838 | SACOL_Satml | gi 57650036 ref NC_002951.2 :875954-876313 | MR150 | M36C05 | OK     | 199870  | 193158  | -0.0492809 | 0.081954  | 0.93468  | 0.999883  |
| gene839 | gene839 | SACOL0848   | gi 57650036 ref NC_002951.2 :876637-876919 | MR150 | M36C05 | OK     | 8.23173 | 13.0235 | 0.661847   | -0.772864 | 0.4396   | 0.999883  |
| gene84  | gene84  | SACOL0087   | gi 57650036 ref NC_002951.2 :97874-97982   | MR150 | M36C05 | NOTEST | 0       | 0       | 0          | 0         | 1        | 1         |
| gene840 | gene840 | SACOL0849   | gi 57650036 ref NC_002951.2 :877185-877509 | MR150 | M36C05 | OK     | 36.6343 | 26.4605 | -0.469357  | 0.671071  | 0.50218  | 0.999883  |
| gene841 | gene841 | SACOL0850   | gi 57650036 ref NC_002951.2 :877524-877671 | MR150 | M36C05 | NOTEST | 0       | 0       | 0          | 0         | 1        | 1         |
| gene842 | gene842 | SACOL0851   | gi 57650036 ref NC_002951.2 :877862-878591 | MR150 | M36C05 | OK     | 1.73642 | 4.38    | 1.33481    | -1.66669  | 0.09558  | 0.621457  |

|         |         |           |                                            |       |        |        |         |         |             |             |          |           |
|---------|---------|-----------|--------------------------------------------|-------|--------|--------|---------|---------|-------------|-------------|----------|-----------|
| gene843 | gene843 | SACOL0853 | gi 57650036 ref NC_002951.2 :879026-879182 | MR150 | M36C05 | NOTEST | 0       | 0       | 0           | 0           | 1        | 1         |
| gene844 | gene844 | SACOL0854 | gi 57650036 ref NC_002951.2 :879189-879711 | MR150 | M36C05 | OK     | 0       | 5.82971 | 1.79769e+30 | 1.79769e+30 | 0.00351  | 0.0851932 |
| gene845 | gene845 | SACOL0855 | gi 57650036 ref NC_002951.2 :879849-880380 | MR150 | M36C05 | OK     | 1.3868  | 8.00628 | 2.52937     | -2.85334    | 0.00433  | 0.0975363 |
| gene846 | gene846 | clfA      | gi 57650036 ref NC_002951.2 :880642-883444 | MR150 | M36C05 | OK     | 94.6643 | 1037.04 | 3.4535      | -3.74127    | 0.00018  | 0.0093974 |
| gene847 | gene847 | SACOL0857 | gi 57650036 ref NC_002951.2 :883664-885191 | MR150 | M36C05 | NOTEST | 0.80793 | 0.99677 | 0.303034    | -0.37094    | 0.71068  | 1         |
| gene848 | gene848 | empbp     | gi 57650036 ref NC_002951.2 :885541-886564 | MR150 | M36C05 | OK     | 2.60495 | 2.54573 | -0.0331768  | 0.044586    | 0.96444  | 0.999883  |
| gene849 | gene849 | SACOL0859 | gi 57650036 ref NC_002951.2 :886898-887369 | MR150 | M36C05 | OK     | 1.69247 | 1.22203 | -0.469851   | 0.43655     | 0.66244  | 0.999883  |
| gene85  | gene85  | SACOL0088 | gi 57650036 ref NC_002951.2 :98199-99861   | MR150 | M36C05 | OK     | 92.7158 | 188.55  | 1.02406     | -1.15367    | 0.24864  | 0.922459  |
| gene850 | gene850 | nuc       | gi 57650036 ref NC_002951.2 :887709-888396 | MR150 | M36C05 | OK     | 10.6877 | 5.89137 | -0.859275   | 1.22109     | 0.22205  | 0.89416   |
| gene851 | gene851 | SACOL0861 | gi 57650036 ref NC_002951.2 :888752-888953 | MR150 | M36C05 | OK     | 15928.5 | 6839.93 | -1.21955    | 1.30852     | 0.1907   | 0.851366  |
| gene852 | gene852 | SACOL0862 | gi 57650036 ref NC_002951.2 :889448-889667 | MR150 | M36C05 | OK     | 27.9931 | 72.5393 | 1.37369     | -1.80009    | 0.07185  | 0.526806  |
| gene853 | gene853 | SACOL0863 | gi 57650036 ref NC_002951.2 :889728-890013 | MR150 | M36C05 | OK     | 9.61861 | 31.1372 | 1.69474     | -2.14027    | 0.03233  | 0.344846  |
| gene854 | gene854 | SACOL0864 | gi 57650036 ref NC_002951.2 :890100-890670 | MR150 | M36C05 | OK     | 4.96355 | 0.89518 | -2.47112    | 2.57207     | 0.01011  | 0.16896   |
| gene855 | gene855 | SACOL0865 | gi 57650036 ref NC_002951.2 :891074-891335 | MR150 | M36C05 | OK     | 18.1772 | 39.128  | 1.10607     | -1.4625     | 0.14361  | 0.743774  |
| gene856 | gene856 | SACOL0866 | gi 57650036 ref NC_002951.2 :891639-891744 | MR150 | M36C05 | NOTEST | 0       | 0       | 0           | 0           | 1        | 1         |
| gene857 | gene857 | SACOL0868 | gi 57650036 ref NC_002951.2 :891875-892112 | MR150 | M36C05 | OK     | 34.887  | 528.328 | 3.92067     | -5.3216     | 1.03E-07 | 1.71E-05  |
| gene858 | gene858 | SACOL0869 | gi 57650036 ref NC_002951.2 :892327-892918 | MR150 | M36C05 | OK     | 6.26311 | 9.03492 | 0.528633    | -0.735979   | 0.46174  | 0.999883  |
| gene859 | gene859 | SACOL0870 | gi 57650036 ref NC_002951.2 :892990-893608 | MR150 | M36C05 | OK     | 37.3509 | 59.68   | 0.676103    | -0.967183   | 0.33345  | 0.999883  |
| gene86  | gene86  | SACOL0089 | gi 57650036 ref NC_002951.2 :100186-101962 | MR150 | M36C05 | OK     | 2.52687 | 22.4486 | 3.1512      | -4.39429    | 1.11E-05 | 0.0008765 |
| gene860 | gene860 | SACOL0871 | gi 57650036 ref NC_002951.2 :893762-894257 | MR150 | M36C05 | OK     | 17.1103 | 96.1957 | 2.49111     | -3.53938    | 0.0004   | 0.0168752 |
| gene861 | gene861 | SACOL0872 | gi 57650036 ref NC_002951.2 :894655-895078 | MR150 | M36C05 | OK     | 12.9965 | 189.707 | 3.86757     | -5.27392    | 1.34E-07 | 2.15E-05  |
| gene862 | gene862 | aroD      | gi 57650036 ref NC_002951.2 :895225-895942 | MR150 | M36C05 | OK     | 9.77184 | 11.3113 | 0.211062    | -0.307137   | 0.75874  | 0.999883  |
| gene863 | gene863 | SACOL0874 | gi 57650036 ref NC_002951.2 :896024-896564 | MR150 | M36C05 | OK     | 29.7038 | 40.5947 | 0.450644    | -0.659899   | 0.50932  | 0.999883  |
| gene864 | gene864 | SACOL0875 | gi 57650036 ref NC_002951.2 :896713-897034 | MR150 | M36C05 | OK     | 160.516 | 210.93  | 0.394048    | -0.558094   | 0.57678  | 0.999883  |
| gene865 | gene865 | SACOL0876 | gi 57650036 ref NC_002951.2 :897177-897534 | MR150 | M36C05 | OK     | 85.1516 | 81.5563 | -0.0622371  | 0.090918    | 0.92756  | 0.999883  |
| gene866 | gene866 | gcvH      | gi 57650036 ref NC_002951.2 :897691-898072 | MR150 | M36C05 | OK     | 621.98  | 888.853 | 0.515077    | -0.602742   | 0.54668  | 0.999883  |
| gene867 | gene867 | SACOL0879 | gi 57650036 ref NC_002951.2 :898250-899129 | MR150 | M36C05 | OK     | 67.8774 | 18.3554 | -1.88673    | 2.6199      | 0.0088   | 0.154274  |
| gene868 | gene868 | SACOL0880 | gi 57650036 ref NC_002951.2 :899870-900546 | MR150 | M36C05 | OK     | 39.7614 | 27.5473 | -0.529458   | 0.601359    | 0.5476   | 0.999883  |
| gene869 | gene869 | SACOL0881 | gi 57650036 ref NC_002951.2 :899870-900546 | MR150 | M36C05 | OK     | 47.8012 | 32.3512 | -0.56323    | 0.522376    | 0.60141  | 0.999883  |
| gene87  | gene87  | SACOL0090 | gi 57650036 ref NC_002951.2 :102135-103008 | MR150 | M36C05 | NOTEST | 0       | 0       | 0           | 0           | 1        | 1         |
| gene870 | gene870 | SACOL0882 | gi 57650036 ref NC_002951.2 :900795-902509 | MR150 | M36C05 | OK     | 10.7528 | 20.0248 | 0.89708     | -1.06528    | 0.28675  | 0.975155  |
| gene871 | gene871 | SACOL0883 | gi 57650036 ref NC_002951.2 :900795-902509 | MR150 | M36C05 | OK     | 8.95068 | 14.4607 | 0.692069    | -0.559754   | 0.57565  | 0.999883  |
| gene872 | gene872 | SACOL0884 | gi 57650036 ref NC_002951.2 :902526-903348 | MR150 | M36C05 | OK     | 24.3698 | 39.9022 | 0.711377    | -1.01845    | 0.30846  | 0.991033  |

|         |         |           |                                            |       |        |        |         |         |             |             |          |           |
|---------|---------|-----------|--------------------------------------------|-------|--------|--------|---------|---------|-------------|-------------|----------|-----------|
| gene873 | gene873 | SACOL0885 | gi 57650036 ref NC_002951.2 :903490-904711 | MR150 | M36C05 | OK     | 3.29994 | 1.40374 | -1.23316    | 1.64482     | 0.10001  | 0.638047  |
| gene874 | gene874 | sek       | gi 57650036 ref NC_002951.2 :904799-905528 | MR150 | M36C05 | OK     | 25.4675 | 6.46572 | -1.97778    | 2.84111     | 0.0045   | 0.0988909 |
| gene875 | gene875 | sei       | gi 57650036 ref NC_002951.2 :905551-906280 | MR150 | M36C05 | OK     | 15.3384 | 7.09143 | -1.113      | 1.61016     | 0.10736  | 0.653986  |
| gene876 | gene876 | SACOL0888 | gi 57650036 ref NC_002951.2 :906349-906781 | MR150 | M36C05 | OK     | 25.0017 | 13.7799 | -0.859462   | 1.23064     | 0.21846  | 0.89416   |
| gene877 | gene877 | SACOL0889 | gi 57650036 ref NC_002951.2 :906797-907256 | MR150 | M36C05 | OK     | 12.9822 | 12.7833 | -0.0222734  | 0.031432    | 0.97493  | 0.999883  |
| gene878 | gene878 | SACOL0890 | gi 57650036 ref NC_002951.2 :907267-907600 | MR150 | M36C05 | OK     | 17.7863 | 36.138  | 1.02275     | -1.43904    | 0.15014  | 0.752771  |
| gene879 | gene879 | SACOL0891 | gi 57650036 ref NC_002951.2 :907792-908321 | MR150 | M36C05 | OK     | 3.91478 | 12.644  | 1.69145     | -1.48533    | 0.13746  | 0.733066  |
| gene88  | gene88  | SACOL0091 | gi 57650036 ref NC_002951.2 :103120-104518 | MR150 | M36C05 | NOTEST | 0       | 0       | 0           | 0           | 1        | 1         |
| gene880 | gene880 | SACOL0892 | gi 57650036 ref NC_002951.2 :907792-908321 | MR150 | M36C05 | OK     | 0       | 2.57159 | 1.79769e+30 | 1.79769e+30 | 0.16297  | 0.791011  |
| gene881 | gene881 | SACOL0893 | gi 57650036 ref NC_002951.2 :908332-908681 | MR150 | M36C05 | OK     | 0       | 21.2822 | 1.79769e+30 | 1.79769e+30 | 0.2187   | 0.89416   |
| gene882 | gene882 | SACOL0894 | gi 57650036 ref NC_002951.2 :908332-908681 | MR150 | M36C05 | NOTEST | 0       | 0       | 0           | 0           | 1        | 1         |
| gene883 | gene883 | SACOL0895 | gi 57650036 ref NC_002951.2 :908683-909004 | MR150 | M36C05 | NOTEST | 0       | 0.87161 | 1.79769e+30 | 1.79769e+30 | 0.14732  | 1         |
| gene884 | gene884 | SACOL0896 | gi 57650036 ref NC_002951.2 :909067-909937 | MR150 | M36C05 | NOTEST | 0       | 0       | 0           | 0           | 1        | 1         |
| gene885 | gene885 | SACOL0897 | gi 57650036 ref NC_002951.2 :909953-911411 | MR150 | M36C05 | NOTEST | 0       | 0       | 0           | 0           | 1        | 1         |
| gene886 | gene886 | SACOL0898 | gi 57650036 ref NC_002951.2 :911711-912074 | MR150 | M36C05 | NOTEST | 0       | 0       | 0           | 0           | 1        | 1         |
| gene887 | gene887 | SACOL0899 | gi 57650036 ref NC_002951.2 :912075-912998 | MR150 | M36C05 | NOTEST | 0       | 0       | 0           | 0           | 1        | 1         |
| gene888 | gene888 | SACOL0900 | gi 57650036 ref NC_002951.2 :912075-912998 | MR150 | M36C05 | OK     | 3.11687 | 3.99528 | 0.358197    | -0.455514   | 0.64874  | 0.999883  |
| gene889 | gene889 | SACOL0901 | gi 57650036 ref NC_002951.2 :913514-913856 | MR150 | M36C05 | OK     | 54.527  | 18.9386 | -1.52564    | 2.17553     | 0.02959  | 0.327061  |
| gene89  | gene89  | SACOL0092 | gi 57650036 ref NC_002951.2 :104707-105181 | MR150 | M36C05 | OK     | 3.90615 | 53.1833 | 3.76716     | -4.93468    | 8.03E-07 | 0.0001002 |
| gene890 | gene890 | SACOL0902 | gi 57650036 ref NC_002951.2 :913867-914446 | MR150 | M36C05 | OK     | 52.4968 | 29.7122 | -0.821174   | 1.19118     | 0.23358  | 0.902568  |
| gene891 | gene891 | SACOL0903 | gi 57650036 ref NC_002951.2 :914463-914682 | MR150 | M36C05 | OK     | 230.943 | 137.575 | -0.747324   | 1.09518     | 0.27344  | 0.958757  |
| gene892 | gene892 | SACOL0904 | gi 57650036 ref NC_002951.2 :914732-915260 | MR150 | M36C05 | OK     | 11.6621 | 5.72302 | -1.02698    | 1.40806     | 0.15911  | 0.779092  |
| gene893 | gene893 | SACOL0905 | gi 57650036 ref NC_002951.2 :915262-916170 | MR150 | M36C05 | OK     | 20.9719 | 7.57543 | -1.46906    | 1.2017      | 0.22948  | 0.898537  |
| gene894 | gene894 | SACOL0906 | gi 57650036 ref NC_002951.2 :915262-916170 | MR150 | M36C05 | OK     | 14.8907 | 7.16144 | -1.05609    | 1.25292     | 0.21024  | 0.888711  |
| gene895 | gene895 | seb       | gi 57650036 ref NC_002951.2 :916477-917278 | MR150 | M36C05 | NOTEST | 0       | 0       | 0           | 0           | 1        | 1         |
| gene896 | gene896 | SACOL0908 | gi 57650036 ref NC_002951.2 :917355-917913 | MR150 | M36C05 | NOTEST | 0       | 0       | 0           | 0           | 1        | 1         |
| gene897 | gene897 | SACOL0909 | gi 57650036 ref NC_002951.2 :918285-918438 | MR150 | M36C05 | OK     | 68.366  | 204.749 | 1.58251     | -1.73222    | 0.08323  | 0.574119  |
| gene898 | gene898 | SACOL0910 | gi 57650036 ref NC_002951.2 :918508-918806 | MR150 | M36C05 | NOTEST | 0       | 0       | 0           | 0           | 1        | 1         |
| gene899 | gene899 | SACOL0911 | gi 57650036 ref NC_002951.2 :918508-918806 | MR150 | M36C05 | OK     | 63.6356 | 83.8398 | 0.397802    | -0.537053   | 0.59123  | 0.999883  |
| gene9   | gene9   | SACOL0010 | gi 57650036 ref NC_002951.2 :14748-15770   | MR150 | M36C05 | OK     | 10.8025 | 8.89889 | -0.279673   | 0.345076    | 0.73004  | 0.999883  |
| gene90  | gene90  | SACOL0093 | gi 57650036 ref NC_002951.2 :105442-107035 | MR150 | M36C05 | OK     | 41.1219 | 31.6506 | -0.377676   | 0.495594    | 0.62018  | 0.999883  |
| gene900 | gene900 | SACOL0912 | gi 57650036 ref NC_002951.2 :919636-919831 | MR150 | M36C05 | OK     | 2511.29 | 58362.5 | 4.53854     | -5.15054    | 2.60E-07 | 3.92E-05  |
| gene901 | gene901 | SACOL0913 | gi 57650036 ref NC_002951.2 :920063-920915 | MR150 | M36C05 | OK     | 57.3008 | 121.635 | 1.08593     | -1.40864    | 0.15894  | 0.778782  |

|         |         |           |                                            |       |        |        |         |         |                               |           |          |           |
|---------|---------|-----------|--------------------------------------------|-------|--------|--------|---------|---------|-------------------------------|-----------|----------|-----------|
| gene902 | gene902 | SACOL0914 | gi 57650036 ref NC_002951.2 :921242-922004 | MR150 | M36C05 | OK     | 184.702 | 353.546 | 0.9367                        | -1.08954  | 0.27592  | 0.961224  |
| gene903 | gene903 | sufD      | gi 57650036 ref NC_002951.2 :922101-923409 | MR150 | M36C05 | OK     | 169.6   | 252.32  | 0.573112                      | -0.634535 | 0.52573  | 0.999883  |
| gene904 | gene904 | SACOL0916 | gi 57650036 ref NC_002951.2 :923523-925219 | MR150 | M36C05 | OK     | 174.754 | 207.478 | 0.247635                      | -0.247208 | 0.80475  | 0.999883  |
| gene905 | gene905 | SACOL0917 | gi 57650036 ref NC_002951.2 :923523-925219 | MR150 | M36C05 | OK     | 164.4   | 159.944 | -0.039643                     | 0.018378  | 0.98534  | 0.999883  |
| gene906 | gene906 | sufB      | gi 57650036 ref NC_002951.2 :925369-926767 | MR150 | M36C05 | OK     | 204.804 | 215.775 | 0.075285                      | -0.082589 | 0.93418  | 0.999883  |
| gene907 | gene907 | SACOL0919 | gi 57650036 ref NC_002951.2 :926953-927091 | MR150 | M36C05 | OK     | 54.4986 | 0       | -1.79769e+3(-1.79769e+0.10824 |           | 0.653986 |           |
| gene908 | gene908 | SACOL0920 | gi 57650036 ref NC_002951.2 :927096-927411 | MR150 | M36C05 | OK     | 3.78043 | 0       | -1.79769e+3(-1.79769e+0.02304 |           | 0.288469 |           |
| gene909 | gene909 | SACOL0921 | gi 57650036 ref NC_002951.2 :927775-928816 | MR150 | M36C05 | OK     | 13.2924 | 62.1485 | 2.22512                       | -3.07224  | 0.00212  | 0.060061  |
| gene91  | gene91  | spa       | gi 57650036 ref NC_002951.2 :107363-108890 | MR150 | M36C05 | OK     | 123.267 | 9.22015 | -3.74085                      | 4.77516   | 1.80E-06 | 0.0001856 |
| gene910 | gene910 | SACOL0922 | gi 57650036 ref NC_002951.2 :928829-929897 | MR150 | M36C05 | OK     | 11.1148 | 34.1717 | 1.62032                       | -2.3111   | 0.02083  | 0.269634  |
| gene911 | gene911 | SACOL0924 | gi 57650036 ref NC_002951.2 :930109-930958 | MR150 | M36C05 | OK     | 48.3645 | 32.8014 | -0.56019                      | 0.785587  | 0.43211  | 0.999883  |
| gene912 | gene912 | SACOL0925 | gi 57650036 ref NC_002951.2 :930970-931798 | MR150 | M36C05 | OK     | 32.9142 | 17.9159 | -0.877466                     | 1.27118   | 0.20367  | 0.875776  |
| gene913 | gene913 | SACOL0926 | gi 57650036 ref NC_002951.2 :931824-933144 | MR150 | M36C05 | OK     | 42.6639 | 26.2803 | -0.699031                     | 0.94511   | 0.3446   | 0.999883  |
| gene914 | gene914 | lipA      | gi 57650036 ref NC_002951.2 :933227-934145 | MR150 | M36C05 | OK     | 320.536 | 192.465 | -0.735891                     | 0.836009  | 0.40315  | 0.999883  |
| gene915 | gene915 | SACOL0928 | gi 57650036 ref NC_002951.2 :934265-934658 | MR150 | M36C05 | OK     | 196.018 | 78.4671 | -1.32083                      | 1.84798   | 0.0646   | 0.508201  |
| gene916 | gene916 | SACOL0929 | gi 57650036 ref NC_002951.2 :934736-934994 | MR150 | M36C05 | OK     | 143.909 | 95.7499 | -0.58781                      | 0.86291   | 0.38819  | 0.999883  |
| gene917 | gene917 | SACOL0930 | gi 57650036 ref NC_002951.2 :935100-936314 | MR150 | M36C05 | OK     | 126.685 | 60.5249 | -1.06564                      | 0.849951  | 0.39535  | 0.999883  |
| gene918 | gene918 | SACOL0931 | gi 57650036 ref NC_002951.2 :935100-936314 | MR150 | M36C05 | OK     | 75.2323 | 45.649  | -0.720767                     | 0.736078  | 0.46168  | 0.999883  |
| gene919 | gene919 | SACOL0932 | gi 57650036 ref NC_002951.2 :936346-937306 | MR150 | M36C05 | OK     | 101.145 | 44.9825 | -1.16899                      | 1.52595   | 0.12702  | 0.707666  |
| gene92  | gene92  | sarS      | gi 57650036 ref NC_002951.2 :109310-110063 | MR150 | M36C05 | OK     | 108.803 | 47.8813 | -1.18418                      | 1.58846   | 0.11218  | 0.664916  |
| gene920 | gene920 | SACOL0933 | gi 57650036 ref NC_002951.2 :937559-937670 | MR150 | M36C05 | NOTEST | 0       | 0       | 0                             | 0         | 1        | 1         |
| gene921 | gene921 | SACOL0934 | gi 57650036 ref NC_002951.2 :937717-937870 | MR150 | M36C05 | OK     | 615.294 | 204.749 | -1.58742                      | 2.13181   | 0.03302  | 0.34869   |
| gene922 | gene922 | dltA      | gi 57650036 ref NC_002951.2 :937885-940554 | MR150 | M36C05 | OK     | 642.095 | 477.899 | -0.426083                     | 0.350715  | 0.7258   | 0.999883  |
| gene923 | gene923 | dltB      | gi 57650036 ref NC_002951.2 :937885-940554 | MR150 | M36C05 | OK     | 544.841 | 246.457 | -1.1445                       | 0.684275  | 0.4938   | 0.999883  |
| gene924 | gene924 | dltC      | gi 57650036 ref NC_002951.2 :940571-941980 | MR150 | M36C05 | OK     | 684.322 | 282.415 | -1.27686                      | 0.293472  | 0.76916  | 0.999883  |
| gene925 | gene925 | dltD      | gi 57650036 ref NC_002951.2 :940571-941980 | MR150 | M36C05 | OK     | 817.975 | 312.682 | -1.38736                      | 1.41437   | 0.15725  | 0.775761  |
| gene926 | gene926 | SACOL0939 | gi 57650036 ref NC_002951.2 :942242-942464 | MR150 | M36C05 | OK     | 146.72  | 73.9046 | -0.989328                     | 1.42383   | 0.1545   | 0.769852  |
| gene927 | gene927 | SACOL0940 | gi 57650036 ref NC_002951.2 :942585-942909 | MR150 | M36C05 | OK     | 142.992 | 67.4316 | -1.08444                      | 1.57831   | 0.11449  | 0.670749  |
| gene928 | gene928 | SACOL0941 | gi 57650036 ref NC_002951.2 :942969-944032 | MR150 | M36C05 | OK     | 90.853  | 79.728  | -0.188448                     | 0.237246  | 0.81247  | 0.999883  |
| gene929 | gene929 | SACOL0942 | gi 57650036 ref NC_002951.2 :944348-944585 | MR150 | M36C05 | OK     | 491.102 | 528.328 | 0.105412                      | -0.146363 | 0.88364  | 0.999883  |
| gene93  | gene93  | sirC      | gi 57650036 ref NC_002951.2 :110431-112422 | MR150 | M36C05 | OK     | 10.7326 | 107.927 | 3.32999                       | -4.39725  | 1.10E-05 | 0.0008765 |
| gene930 | gene930 | SACOL0943 | gi 57650036 ref NC_002951.2 :944597-944957 | MR150 | M36C05 | OK     | 206.826 | 364.691 | 0.818252                      | -1.08627  | 0.27736  | 0.963271  |
| gene931 | gene931 | SACOL0944 | gi 57650036 ref NC_002951.2 :945410-946619 | MR150 | M36C05 | OK     | 105.791 | 77.7971 | -0.443431                     | 0.543522  | 0.58677  | 0.999883  |

|         |         |           |                                            |       |        |        |         |         |             |             |         |          |
|---------|---------|-----------|--------------------------------------------|-------|--------|--------|---------|---------|-------------|-------------|---------|----------|
| gene932 | gene932 | SACOL0945 | gi 57650036 ref NC_002951.2 :946749-948225 | MR150 | M36C05 | OK     | 42.3707 | 91.2242 | 1.10635     | -1.37563    | 0.16894 | 0.808591 |
| gene933 | gene933 | SACOL0946 | gi 57650036 ref NC_002951.2 :948635-949952 | MR150 | M36C05 | OK     | 7.81529 | 11.251  | 0.525679    | -0.771155   | 0.44062 | 0.999883 |
| gene934 | gene934 | SACOL0947 | gi 57650036 ref NC_002951.2 :949970-950345 | MR150 | M36C05 | OK     | 44.9454 | 61.1852 | 0.445009    | -0.653747   | 0.51328 | 0.999883 |
| gene935 | gene935 | SACOL0948 | gi 57650036 ref NC_002951.2 :950400-951555 | MR150 | M36C05 | OK     | 0.48108 | 1.50084 | 1.64143     | -1.79672    | 0.07238 | 0.527706 |
| gene936 | gene936 | mnhG      | gi 57650036 ref NC_002951.2 :951803-952910 | MR150 | M36C05 | OK     | 108.114 | 45.6162 | -1.24493    | 1.11644     | 0.26423 | 0.945724 |
| gene937 | gene937 | mnhF      | gi 57650036 ref NC_002951.2 :951803-952910 | MR150 | M36C05 | OK     | 16.3319 | 7.48446 | -1.12572    | 0.321768    | 0.74763 | 0.999883 |
| gene938 | gene938 | mnhE      | gi 57650036 ref NC_002951.2 :951803-952910 | MR150 | M36C05 | OK     | 63.8977 | 42.1905 | -0.598847   | 0.608103    | 0.54312 | 0.999883 |
| gene939 | gene939 | mnhD      | gi 57650036 ref NC_002951.2 :952911-957568 | MR150 | M36C05 | OK     | 73.8047 | 56.0064 | -0.39812    | 0.219873    | 0.82597 | 0.999883 |
| gene94  | gene94  | sirB      | gi 57650036 ref NC_002951.2 :110431-112422 | MR150 | M36C05 | OK     | 0.38475 | 1.66242 | 2.11129     | -0.394195   | 0.69344 | 0.999883 |
| gene940 | gene940 | mnhC      | gi 57650036 ref NC_002951.2 :952911-957568 | MR150 | M36C05 | OK     | 52.4298 | 62.876  | 0.262124    | -0.046383   | 0.96301 | 0.999883 |
| gene941 | gene941 | mnhB      | gi 57650036 ref NC_002951.2 :952911-957568 | MR150 | M36C05 | OK     | 45.3166 | 54.387  | 0.263223    | -0.054333   | 0.95667 | 0.999883 |
| gene942 | gene942 | mnhA      | gi 57650036 ref NC_002951.2 :952911-957568 | MR150 | M36C05 | OK     | 79.9913 | 106.551 | 0.413633    | -0.360649   | 0.71836 | 0.999883 |
| gene943 | gene943 | kapB      | gi 57650036 ref NC_002951.2 :957698-958082 | MR150 | M36C05 | OK     | 78.2898 | 50.5964 | -0.629789   | 0.921598    | 0.35674 | 0.999883 |
| gene944 | gene944 | SACOL0957 | gi 57650036 ref NC_002951.2 :958145-958739 | MR150 | M36C05 | OK     | 178.306 | 63.3224 | -1.49357    | 1.98912     | 0.04669 | 0.42474  |
| gene945 | gene945 | SACOL0958 | gi 57650036 ref NC_002951.2 :959154-959532 | MR150 | M36C05 | OK     | 201.574 | 486.568 | 1.27133     | -1.64099    | 0.1008  | 0.638218 |
| gene946 | gene946 | SACOL0959 | gi 57650036 ref NC_002951.2 :959893-961021 | MR150 | M36C05 | OK     | 61.8838 | 176.673 | 1.51345     | -1.83681    | 0.06624 | 0.515048 |
| gene947 | gene947 | rocD      | gi 57650036 ref NC_002951.2 :961328-962519 | MR150 | M36C05 | OK     | 411.84  | 786.996 | 0.934273    | -0.967264   | 0.33341 | 0.999883 |
| gene948 | gene948 | gluD      | gi 57650036 ref NC_002951.2 :962627-963872 | MR150 | M36C05 | OK     | 775.856 | 1143.6  | 0.559724    | -0.572619   | 0.5669  | 0.999883 |
| gene949 | gene949 | SACOL0962 | gi 57650036 ref NC_002951.2 :964374-965304 | MR150 | M36C05 | OK     | 36.0787 | 40.6392 | 0.171725    | -0.239417   | 0.81078 | 0.999883 |
| gene95  | gene95  | sirA      | gi 57650036 ref NC_002951.2 :112437-113430 | MR150 | M36C05 | OK     | 5.6     | 4.03274 | -0.473667   | 0.674006    | 0.50031 | 0.999883 |
| gene950 | gene950 | argH      | gi 57650036 ref NC_002951.2 :965545-968120 | MR150 | M36C05 | OK     | 110.324 | 24.8497 | -2.15044    | 2.11954     | 0.03404 | 0.353699 |
| gene951 | gene951 | argG      | gi 57650036 ref NC_002951.2 :965545-968120 | MR150 | M36C05 | OK     | 72.7674 | 13.151  | -2.46812    | 1.7413      | 0.08163 | 0.568583 |
| gene952 | gene952 | SACOL0965 | gi 57650036 ref NC_002951.2 :968264-968399 | MR150 | M36C05 | NOTEST | 0       | 0       | 0           | 0           | 1       | 1        |
| gene953 | gene953 | pgi       | gi 57650036 ref NC_002951.2 :968470-969802 | MR150 | M36C05 | OK     | 103.094 | 294.489 | 1.51425     | -1.70243    | 0.08867 | 0.597944 |
| gene954 | gene954 | SACOL0967 | gi 57650036 ref NC_002951.2 :970126-970702 | MR150 | M36C05 | OK     | 43.5532 | 30.5369 | -0.512223   | 0.746759    | 0.45521 | 0.999883 |
| gene955 | gene955 | spsA      | gi 57650036 ref NC_002951.2 :970706-971231 | MR150 | M36C05 | OK     | 56.9642 | 37.7131 | -0.594992   | 0.86417     | 0.38749 | 0.999883 |
| gene956 | gene956 | spsB      | gi 57650036 ref NC_002951.2 :971237-971822 | MR150 | M36C05 | OK     | 89.8433 | 51.6148 | -0.799626   | 1.11796     | 0.26358 | 0.945272 |
| gene957 | gene957 | rexB      | gi 57650036 ref NC_002951.2 :971981-975458 | MR150 | M36C05 | OK     | 42.6323 | 38.8014 | -0.135837   | 0.15927     | 0.87346 | 0.999883 |
| gene958 | gene958 | rexA      | gi 57650036 ref NC_002951.2 :975458-979112 | MR150 | M36C05 | OK     | 35.658  | 32.6975 | -0.125046   | 0.148714    | 0.88178 | 0.999883 |
| gene959 | gene959 | SACOL0973 | gi 57650036 ref NC_002951.2 :979277-980180 | MR150 | M36C05 | OK     | 252.88  | 345.46  | 0.450068    | -0.503259   | 0.61478 | 0.999883 |
| gene96  | gene96  | SACOL0100 | gi 57650036 ref NC_002951.2 :113693-114641 | MR150 | M36C05 | OK     | 0       | 1.32692 | 1.79769e+30 | 1.79769e+30 | 0.008   | 0.14471  |
| gene960 | gene960 | SACOL0974 | gi 57650036 ref NC_002951.2 :980508-980898 | MR150 | M36C05 | OK     | 43.1551 | 60.6095 | 0.490013    | -0.719492   | 0.47184 | 0.999883 |
| gene961 | gene961 | SACOL0975 | gi 57650036 ref NC_002951.2 :981068-982385 | MR150 | M36C05 | OK     | 99.8163 | 156.823 | 0.651788    | -0.760316   | 0.44707 | 0.999883 |



|         |         |           |                                              |       |        |        |         |         |             |             |         |           |
|---------|---------|-----------|----------------------------------------------|-------|--------|--------|---------|---------|-------------|-------------|---------|-----------|
| gene962 | gene962 | SACOL0976 | gi 57650036 ref NC_002951.2 :982436-983261   | MR150 | M36C05 | OK     | 91.132  | 142.075 | 0.640625    | -0.808547   | 0.41878 | 0.999883  |
| gene963 | gene963 | SACOL0977 | gi 57650036 ref NC_002951.2 :983374-983683   | MR150 | M36C05 | OK     | 334.729 | 286.216 | -0.225892   | 0.306885    | 0.75893 | 0.999883  |
| gene964 | gene964 | SACOL0978 | gi 57650036 ref NC_002951.2 :984229-986044   | MR150 | M36C05 | OK     | 2.84523 | 2.25204 | -0.33731    | 0.483092    | 0.62903 | 0.999883  |
| gene965 | gene965 | clpB      | gi 57650036 ref NC_002951.2 :986246-988856   | MR150 | M36C05 | OK     | 555.008 | 112.206 | -2.30636    | 2.43925     | 0.01472 | 0.210573  |
| gene966 | gene966 | SACOL0980 | gi 57650036 ref NC_002951.2 :988914-989784   | MR150 | M36C05 | OK     | 1.59974 | 0.65849 | -1.28061    | 1.36306     | 0.17286 | 0.820873  |
| gene967 | gene967 | SACOL0981 | gi 57650036 ref NC_002951.2 :989893-993274   | MR150 | M36C05 | NOTEST | 0.48565 | 0.69929 | 0.525968    | -0.278986   | 0.78026 | 1         |
| gene968 | gene968 | SACOL0982 | gi 57650036 ref NC_002951.2 :989893-993274   | MR150 | M36C05 | OK     | 0.34632 | 1.99764 | 2.52812     | -0.972766   | 0.33067 | 0.999883  |
| gene969 | gene969 | SACOL0983 | gi 57650036 ref NC_002951.2 :989893-993274   | MR150 | M36C05 | OK     | 1.66639 | 2.0396  | 0.291559    | -0.272188   | 0.78548 | 0.999883  |
| gene97  | gene97  | SACOL0101 | gi 57650036 ref NC_002951.2 :114649-115648   | MR150 | M36C05 | NOTEST | 0.19165 | 0.82809 | 2.11128     | -1.57592    | 0.11504 | 1         |
| gene970 | gene970 | SACOL0984 | gi 57650036 ref NC_002951.2 :989893-993274   | MR150 | M36C05 | OK     | 2.42075 | 5.591   | 1.20765     | -0.926203   | 0.35434 | 0.999883  |
| gene971 | gene971 | SACOL0985 | gi 57650036 ref NC_002951.2 :993584-994019   | MR150 | M36C05 | OK     | 72.7626 | 41.2883 | -0.817463   | 1.19189     | 0.23331 | 0.902568  |
| gene972 | gene972 | SACOL0986 | gi 57650036 ref NC_002951.2 :994275-994461   | MR150 | M36C05 | OK     | 3337.23 | 2020.63 | -0.723844   | 0.935373    | 0.3496  | 0.999883  |
| gene973 | gene973 | fabH      | gi 57650036 ref NC_002951.2 :994755-995697   | MR150 | M36C05 | OK     | 68.5146 | 13.5252 | -2.34076    | 3.23897     | 0.0012  | 0.0391064 |
| gene974 | gene974 | fabF      | gi 57650036 ref NC_002951.2 :995708-996953   | MR150 | M36C05 | OK     | 165.899 | 111.301 | -0.575841   | 0.670502    | 0.50254 | 0.999883  |
| gene975 | gene975 | SACOL0989 | gi 57650036 ref NC_002951.2 :997007-997379   | MR150 | M36C05 | OK     | 14.0572 | 11.4234 | -0.299318   | 0.404014    | 0.6862  | 0.999883  |
| gene976 | gene976 | SACOL0990 | gi 57650036 ref NC_002951.2 :997601-999618   | MR150 | M36C05 | NOTEST | 0       | 0       | 0           | 0           | 1       | 1         |
| gene977 | gene977 | oppB      | gi 57650036 ref NC_002951.2 :997601-999618   | MR150 | M36C05 | OK     | 353.415 | 111.321 | -1.66664    | 1.23015     | 0.21864 | 0.89416   |
| gene978 | gene978 | oppC      | gi 57650036 ref NC_002951.2 :997601-999618   | MR150 | M36C05 | OK     | 278.496 | 108.745 | -1.35671    | 1.08137     | 0.27953 | 0.965951  |
| gene979 | gene979 | oppD      | gi 57650036 ref NC_002951.2 :999634-1001648  | MR150 | M36C05 | OK     | 394.379 | 195.675 | -1.01112    | 0.880925    | 0.37836 | 0.999883  |
| gene98  | gene98  | SACOL0102 | gi 57650036 ref NC_002951.2 :115668-124110   | MR150 | M36C05 | OK     | 0.2955  | 1.27581 | 2.11019     | -0.958577   | 0.33777 | 0.999883  |
| gene980 | gene980 | oppF      | gi 57650036 ref NC_002951.2 :999634-1001648  | MR150 | M36C05 | OK     | 245.58  | 105.675 | -1.21655    | 0.741141    | 0.45861 | 0.999883  |
| gene981 | gene981 | SACOL0995 | gi 57650036 ref NC_002951.2 :1001665-1003321 | MR150 | M36C05 | OK     | 405.738 | 164.119 | -1.30581    | 1.38875     | 0.16491 | 0.796695  |
| gene982 | gene982 | SACOL0996 | gi 57650036 ref NC_002951.2 :1003532-1005248 | MR150 | M36C05 | OK     | 0.70723 | 1.23595 | 0.805366    | -1.01195    | 0.31156 | 0.993813  |
| gene983 | gene983 | SACOL0997 | gi 57650036 ref NC_002951.2 :1005298-1006285 | MR150 | M36C05 | OK     | 0.7783  | 1.40121 | 0.848278    | -0.953056   | 0.34056 | 0.999883  |
| gene984 | gene984 | SACOL0998 | gi 57650036 ref NC_002951.2 :1006287-1008223 | MR150 | M36C05 | NOTEST | 0.39214 | 0.98839 | 1.33372     | -0.632344   | 0.52716 | 1         |
| gene985 | gene985 | SACOL0999 | gi 57650036 ref NC_002951.2 :1006287-1008223 | MR150 | M36C05 | OK     | 4.01385 | 5.49228 | 0.452421    | -0.605359   | 0.54494 | 0.999883  |
| gene986 | gene986 | SACOL1000 | gi 57650036 ref NC_002951.2 :1008234-1009116 | MR150 | M36C05 | OK     | 5.38836 | 6.14542 | 0.189664    | -0.270998   | 0.78639 | 0.999883  |
| gene987 | gene987 | trpS      | gi 57650036 ref NC_002951.2 :1009157-1010147 | MR150 | M36C05 | OK     | 85.8696 | 62.3961 | -0.460691   | 0.595479    | 0.55152 | 0.999883  |
| gene988 | gene988 | spxA      | gi 57650036 ref NC_002951.2 :1010441-1010837 | MR150 | M36C05 | OK     | 9014.06 | 28626.7 | 1.66711     | -1.82367    | 0.0682  | 0.522414  |
| gene989 | gene989 | SACOL1003 | gi 57650036 ref NC_002951.2 :1011207-1011927 | MR150 | M36C05 | OK     | 25.6136 | 179.086 | 2.80567     | -3.72227    | 0.0002  | 0.0097866 |
| gene99  | gene99  | SACOL0103 | gi 57650036 ref NC_002951.2 :115668-124110   | MR150 | M36C05 | OK     | 0.14489 | 1.1473  | 2.9852      | -0.836954   | 0.40262 | 0.999883  |
| gene990 | gene990 | SACOL1004 | gi 57650036 ref NC_002951.2 :1012047-1013034 | MR150 | M36C05 | OK     | 0       | 1.12097 | 1.79769e+30 | 1.79769e+30 | 0.00944 | 0.161634  |
| gene991 | gene991 | pepF      | gi 57650036 ref NC_002951.2 :1013081-1014890 | MR150 | M36C05 | OK     | 36.9355 | 69.9369 | 0.921045    | -1.14238    | 0.25329 | 0.930503  |

|         |         |           |                                              |       |        |    |         |         |            |           |         |          |
|---------|---------|-----------|----------------------------------------------|-------|--------|----|---------|---------|------------|-----------|---------|----------|
| gene992 | gene992 | SACOL1006 | gi 57650036 ref NC_002951.2 :1015349-1016156 | MR150 | M36C05 | OK | 96.3551 | 157.562 | 0.709482   | -0.889997 | 0.37347 | 0.999883 |
| gene993 | gene993 | SACOL1007 | gi 57650036 ref NC_002951.2 :1016178-1016544 | MR150 | M36C05 | OK | 109.006 | 213.26  | 0.968199   | -1.35396  | 0.17575 | 0.821477 |
| gene994 | gene994 | SACOL1008 | gi 57650036 ref NC_002951.2 :1016647-1017241 | MR150 | M36C05 | OK | 16.3156 | 24.0961 | 0.562547   | -0.825379 | 0.40916 | 0.999883 |
| gene995 | gene995 | SACOL1009 | gi 57650036 ref NC_002951.2 :1017426-1017774 | MR150 | M36C05 | OK | 44.4412 | 43.7798 | -0.0216298 | 0.031699  | 0.97471 | 0.999883 |
| gene996 | gene996 | relA1     | gi 57650036 ref NC_002951.2 :1017790-1018426 | MR150 | M36C05 | OK | 30.8951 | 46.8324 | 0.600127   | -0.867857 | 0.38547 | 0.999883 |
| gene997 | gene997 | ppnK      | gi 57650036 ref NC_002951.2 :1018442-1020103 | MR150 | M36C05 | OK | 65.7617 | 90.4184 | 0.45937    | -0.512623 | 0.60822 | 0.999883 |
| gene998 | gene998 | SACOL1012 | gi 57650036 ref NC_002951.2 :1018442-1020103 | MR150 | M36C05 | OK | 19.1687 | 27.617  | 0.526807   | -0.332875 | 0.73923 | 0.999883 |
| gene999 | gene999 | mgtE      | gi 57650036 ref NC_002951.2 :1020123-1021509 | MR150 | M36C05 | OK | 21.824  | 27.2334 | 0.319464   | -0.443763 | 0.65721 | 0.999883 |

---

**Supplementary Table S7. Differentially expressed genes in MR100 compared with M18C06, related to Figure 3a**

| test_id  | gene_id  | gene      | locus                                        | MR100 | M18C06 | status | FPKM (MR100) | FPKM(M18C06) | log2(fold change) | test_stat   | p_value   | q_value  |
|----------|----------|-----------|----------------------------------------------|-------|--------|--------|--------------|--------------|-------------------|-------------|-----------|----------|
| gene0    | gene0    | dnaA      | gi 57650036 ref NC_002951.2 :543-1905        | q1    | q2     | OK     | 243.243      | 67.5088      | -1.84925          | 2.42054     | 0.0154975 | 0.288253 |
| gene1001 | gene1001 | fabI      | gi 57650036 ref NC_002951.2 :1023640-1024411 | q1    | q2     | OK     | 331.158      | 115.766      | -1.51631          | 2.20362     | 0.0275514 | 0.380118 |
| gene1046 | gene1046 | SACOL1060 | gi 57650036 ref NC_002951.2 :1067066-1067486 | q1    | q2     | OK     | 58.0817      | 27.8608      | -1.05985          | 1.99188     | 0.0463845 | 0.487329 |
| gene1052 | gene1052 | qoxD      | gi 57650036 ref NC_002951.2 :1076195-1076474 | q1    | q2     | OK     | 562.719      | 253.866      | -1.14835          | 2.28619     | 0.0222431 | 0.342403 |
| gene1056 | gene1056 | SACOL1071 | gi 57650036 ref NC_002951.2 :1080737-1081055 | q1    | q2     | OK     | 125.851      | 61.4854      | -1.0334           | 2.00473     | 0.0449922 | 0.481552 |
| gene1066 | gene1066 | purN      | gi 57650036 ref NC_002951.2 :1090827-1091394 | q1    | q2     | OK     | 301.067      | 54.7122      | -2.46015          | 4.25977     | 2.05E-05  | 0.005709 |
| gene1067 | gene1067 | purH      | gi 57650036 ref NC_002951.2 :1091408-1092887 | q1    | q2     | OK     | 259.904      | 59.9876      | -2.11525          | 2.6839      | 0.007277  | 0.180916 |
| gene1068 | gene1068 | purD      | gi 57650036 ref NC_002951.2 :1092908-1094156 | q1    | q2     | OK     | 398.494      | 70.512       | -2.49862          | 3.0552      | 0.0022491 | 0.09572  |
| gene1072 | gene1072 | SACOL1087 | gi 57650036 ref NC_002951.2 :1097856-1097991 | q1    | q2     | OK     | 113.287      | 656.979      | 2.53586           | -2.43251    | 0.0149945 | 0.287414 |
| gene1092 | gene1092 | SACOL1107 | gi 57650036 ref NC_002951.2 :1117542-1118082 | q1    | q2     | OK     | 115.666      | 44.4122      | -1.38094          | 2.79288     | 0.005224  | 0.144433 |
| gene1106 | gene1106 | SACOL1121 | gi 57650036 ref NC_002951.2 :1130103-1130379 | q1    | q2     | OK     | 1057.36      | 474.329      | -1.15651          | 2.02472     | 0.042896  | 0.472836 |
| gene1110 | gene1110 | ctaB      | gi 57650036 ref NC_002951.2 :1137415-1138327 | q1    | q2     | OK     | 218.494      | 85.951       | -1.34601          | 2.08214     | 0.0373297 | 0.444619 |
| gene1111 | gene1111 | SACOL1126 | gi 57650036 ref NC_002951.2 :1138351-1138813 | q1    | q2     | OK     | 274.804      | 99.8969      | -1.45989          | 2.79664     | 0.0051637 | 0.144433 |
| gene1118 | gene1118 | SACOL1133 | gi 57650036 ref NC_002951.2 :1142570-1143113 | q1    | q2     | OK     | 137.932      | 60.9254      | -1.17885          | 2.38413     | 0.0171193 | 0.307047 |
| gene1119 | gene1119 | coaD      | gi 57650036 ref NC_002951.2 :1143114-1143597 | q1    | q2     | OK     | 141.468      | 59.8865      | -1.24018          | 2.51752     | 0.0118186 | 0.249708 |
| gene1121 | gene1121 | SACOL1136 | gi 57650036 ref NC_002951.2 :1144924-1145482 | q1    | q2     | OK     | 274.141      | 103.592      | -1.40401          | 2.50935     | 0.0120953 | 0.249708 |
| gene1122 | gene1122 | rpmF      | gi 57650036 ref NC_002951.2 :1145561-1145735 | q1    | q2     | OK     | 996.486      | 375.033      | -1.40983          | 2.58534     | 0.0097283 | 0.226936 |
| gene1131 | gene1131 | SACOL1147 | gi 57650036 ref NC_002951.2 :1154423-1155164 | q1    | q2     | OK     | 135.451      | 60.6379      | -1.15948          | 2.2337      | 0.0255031 | 0.368182 |
| gene1135 | gene1135 | SACOL1151 | gi 57650036 ref NC_002951.2 :1160483-1160750 | q1    | q2     | OK     | 473.018      | 110.189      | -2.10191          | 4.09642     | 4.20E-05  | 0.008409 |
| gene1136 | gene1136 | SACOL1152 | gi 57650036 ref NC_002951.2 :1160750-1161272 | q1    | q2     | OK     | 112.065      | 53.0038      | -1.08017          | 2.20451     | 0.0274885 | 0.380118 |
| gene114  | gene114  | sodA1     | gi 57650036 ref NC_002951.2 :133398-133998   | q1    | q2     | OK     | 181.667      | 83.6598      | -1.11869          | 2.14993     | 0.0315608 | 0.419308 |
| gene1142 | gene1142 | sdhC      | gi 57650036 ref NC_002951.2 :1168330-1168945 | q1    | q2     | OK     | 511.363      | 143.772      | -1.83056          | 2.58419     | 0.0097607 | 0.226936 |
| gene115  | gene115  | SACOL0119 | gi 57650036 ref NC_002951.2 :134365-135091   | q1    | q2     | OK     | 682.839      | 37.9713      | -4.16856          | 5.32641     | 1.00E-07  | 0.000126 |
| gene1151 | gene1151 | SACOL1167 | gi 57650036 ref NC_002951.2 :1175968-1176475 | q1    | q2     | OK     | 72.2103      | 31.3974      | -1.20156          | 2.38417     | 0.0171178 | 0.307047 |
| gene1171 | gene1171 | SACOL1186 | gi 57650036 ref NC_002951.2 :1192216-1192351 | q1    | q2     | OK     | 141.609      | 0            | -1.79769e+3       | -1.79769e+3 | 0.0370172 | 0.444619 |
| gene1176 | gene1176 | mraZ      | gi 57650036 ref NC_002951.2 :1195861-1196293 | q1    | q2     | OK     | 659.431      | 150.635      | -2.13016          | 3.30418     | 0.0009525 | 0.051232 |
| gene119  | gene119  | deoC1     | gi 57650036 ref NC_002951.2 :138420-139083   | q1    | q2     | OK     | 212.565      | 79.2951      | -1.4226           | 2.55431     | 0.0106398 | 0.23854  |
| gene1215 | gene1215 | SACOL1230 | gi 57650036 ref NC_002951.2 :1240127-1241222 | q1    | q2     | OK     | 180.048      | 63.3472      | -1.50703          | 2.32603     | 0.0200168 | 0.32851  |
| gene1236 | gene1236 | rpsP      | gi 57650036 ref NC_002951.2 :1263500-1263776 | q1    | q2     | OK     | 167.578      | 50.6701      | -1.72562          | 3.15045     | 0.0016302 | 0.073097 |
| gene1254 | gene1254 | rpsB      | gi 57650036 ref NC_002951.2 :1284585-1285350 | q1    | q2     | OK     | 733.208      | 112.644      | -2.70245          | 3.32283     | 0.0008911 | 0.049722 |

|          |          |           |                                              |    |    |    |         |         |          |          |           |          |
|----------|----------|-----------|----------------------------------------------|----|----|----|---------|---------|----------|----------|-----------|----------|
| gene1264 | gene1264 | SACOL1284 | gi 57650036 ref NC_002951.2 :1297898-1298366 | q1 | q2 | OK | 218.988 | 97.7964 | -1.163   | 2.30158  | 0.0213586 | 0.341601 |
| gene1267 | gene1267 | SACOL1287 | gi 57650036 ref NC_002951.2 :1299582-1300181 | q1 | q2 | OK | 309.19  | 133.706 | -1.20942 | 1.98366  | 0.0472935 | 0.493802 |
| gene1269 | gene1269 | rbfA      | gi 57650036 ref NC_002951.2 :1302688-1303039 | q1 | q2 | OK | 386.008 | 84.0246 | -2.19975 | 4.22913  | 2.35E-05  | 0.005891 |
| gene1286 | gene1286 | SACOL1306 | gi 57650036 ref NC_002951.2 :1323249-1323465 | q1 | q2 | OK | 374.934 | 954.071 | 1.34746  | -2.75854 | 0.005806  | 0.153462 |
| gene1297 | gene1297 | glpF      | gi 57650036 ref NC_002951.2 :1336107-1336926 | q1 | q2 | OK | 779.9   | 98.3048 | -2.98796 | 3.6113   | 0.0003047 | 0.026823 |
| gene1298 | gene1298 | glpK      | gi 57650036 ref NC_002951.2 :1337054-1338551 | q1 | q2 | OK | 426.75  | 70.4357 | -2.59901 | 3.02393  | 0.0024952 | 0.09945  |
| gene1299 | gene1299 | glpD      | gi 57650036 ref NC_002951.2 :1338708-1340382 | q1 | q2 | OK | 975.565 | 175.853 | -2.47187 | 2.48132  | 0.0130897 | 0.265066 |
| gene130  | gene130  | cap5A     | gi 57650036 ref NC_002951.2 :153404-154073   | q1 | q2 | OK | 44.6394 | 326.32  | 2.8699   | -4.57236 | 4.82E-06  | 0.003027 |
| gene1302 | gene1302 | SACOL1324 | gi 57650036 ref NC_002951.2 :1342413-1342647 | q1 | q2 | OK | 214.044 | 85.0976 | -1.33072 | 2.39863  | 0.0164565 | 0.299437 |
| gene131  | gene131  | cap5B     | gi 57650036 ref NC_002951.2 :154088-154775   | q1 | q2 | OK | 33.9342 | 234.956 | 2.79158  | -4.8264  | 1.39E-06  | 0.001164 |
| gene1317 | gene1317 | SACOL1340 | gi 57650036 ref NC_002951.2 :1353195-1353444 | q1 | q2 | OK | 18.711  | 56.3221 | 1.58982  | -2.19098 | 0.0284536 | 0.39042  |
| gene132  | gene132  | cap5C     | gi 57650036 ref NC_002951.2 :154777-155542   | q1 | q2 | OK | 34.1478 | 156.021 | 2.19187  | -4.07498 | 4.60E-05  | 0.008409 |
| gene1342 | gene1342 | SACOL1366 | gi 57650036 ref NC_002951.2 :1371609-1371924 | q1 | q2 | OK | 147.465 | 58.88   | -1.32453 | 2.56458  | 0.0103301 | 0.237971 |
| gene1345 | gene1345 | rpmG      | gi 57650036 ref NC_002951.2 :1375407-1375557 | q1 | q2 | OK | 99.2507 | 341.63  | 1.78329  | -2.00069 | 0.0454255 | 0.481552 |
| gene135  | gene135  | cap5F     | gi 57650036 ref NC_002951.2 :158415-159525   | q1 | q2 | OK | 37.5979 | 123.932 | 1.72083  | -3.01893 | 0.0025367 | 0.099524 |
| gene1354 | gene1354 | SACOL1378 | gi 57650036 ref NC_002951.2 :1382592-1382920 | q1 | q2 | OK | 215.687 | 71.9024 | -1.58483 | 2.85756  | 0.0042692 | 0.131239 |
| gene136  | gene136  | cap5G     | gi 57650036 ref NC_002951.2 :159528-160653   | q1 | q2 | OK | 32.6539 | 93.8904 | 1.52372  | -2.8614  | 0.0042178 | 0.131239 |
| gene1374 | gene1374 | dmpI      | gi 57650036 ref NC_002951.2 :1409698-1409884 | q1 | q2 | OK | 135.553 | 35.787  | -1.92134 | 2.15909  | 0.030843  | 0.418631 |
| gene1412 | gene1412 | SACOL1437 | gi 57650036 ref NC_002951.2 :1449689-1449890 | q1 | q2 | OK | 5730.5  | 2164.15 | -1.40486 | 2.03323  | 0.0420291 | 0.472836 |
| gene146  | gene146  | SACOL0152 | gi 57650036 ref NC_002951.2 :170037-170364   | q1 | q2 | OK | 73.9922 | 15.5613 | -2.24941 | 3.59513  | 0.0003242 | 0.027138 |
| gene147  | gene147  | SACOL0153 | gi 57650036 ref NC_002951.2 :170370-170754   | q1 | q2 | OK | 55.9765 | 18.3896 | -1.60593 | 2.78871  | 0.0052919 | 0.144433 |
| gene1493 | gene1493 | fer       | gi 57650036 ref NC_002951.2 :1564395-1564644 | q1 | q2 | OK | 430.352 | 163.14  | -1.39941 | 2.79206  | 0.0052374 | 0.144433 |
| gene1494 | gene1494 | SACOL1526 | gi 57650036 ref NC_002951.2 :1564749-1565295 | q1 | q2 | OK | 264.157 | 105.921 | -1.31841 | 2.39914  | 0.0164335 | 0.299437 |
| gene150  | gene150  | SACOL0156 | gi 57650036 ref NC_002951.2 :174334-174538   | q1 | q2 | OK | 41.5265 | 208.549 | 2.32829  | -3.37528 | 0.0007374 | 0.042082 |
| gene1507 | gene1507 | xerD      | gi 57650036 ref NC_002951.2 :1577614-1578502 | q1 | q2 | OK | 189.606 | 55.3129 | -1.77731 | 2.96019  | 0.0030745 | 0.107223 |
| gene1559 | gene1559 | SACOL1593 | gi 57650036 ref NC_002951.2 :1625946-1628758 | q1 | q2 | OK | 374.584 | 58.5241 | -2.67819 | 2.14567  | 0.031899  | 0.419363 |
| gene1561 | gene1561 | gcvT      | gi 57650036 ref NC_002951.2 :1628777-1629869 | q1 | q2 | OK | 152.072 | 49.8851 | -1.60808 | 2.64253  | 0.0082288 | 0.198678 |
| gene1573 | gene1573 | SACOL1607 | gi 57650036 ref NC_002951.2 :1637893-1638433 | q1 | q2 | OK | 137.178 | 66.9884 | -1.03406 | 2.09723  | 0.0359735 | 0.441533 |
| gene159  | gene159  | SACOL0165 | gi 57650036 ref NC_002951.2 :190145-190790   | q1 | q2 | OK | 110.061 | 39.1888 | -1.48979 | 2.99119  | 0.0027789 | 0.101128 |
| gene1608 | gene1608 | rpsT      | gi 57650036 ref NC_002951.2 :1674065-1674317 | q1 | q2 | OK | 424.944 | 149.212 | -1.50991 | 3.00071  | 0.0026935 | 0.101128 |
| gene1620 | gene1620 | SACOL1654 | gi 57650036 ref NC_002951.2 :1683311-1683839 | q1 | q2 | OK | 129.201 | 38.6792 | -1.73998 | 3.47234  | 0.0005159 | 0.033219 |
| gene1621 | gene1621 | mtn       | gi 57650036 ref NC_002951.2 :1683858-1684545 | q1 | q2 | OK | 95.1051 | 35.9253 | -1.40452 | 2.83335  | 0.0046063 | 0.137671 |
| gene1622 | gene1622 | SACOL1656 | gi 57650036 ref NC_002951.2 :1684858-1685128 | q1 | q2 | OK | 61.8245 | 25.5139 | -1.27689 | 1.97059  | 0.0487708 | 0.499851 |

|          |          |           |                                              |    |    |    |         |         |          |          |           |          |
|----------|----------|-----------|----------------------------------------------|----|----|----|---------|---------|----------|----------|-----------|----------|
| gene1624 | gene1624 | SACOL1658 | gi 57650036 ref NC_002951.2 :1686495-1687716 | q1 | q2 | OK | 100.12  | 36.1727 | -1.46876 | 2.6358   | 0.0083938 | 0.200732 |
| gene1625 | gene1625 | SACOL1659 | gi 57650036 ref NC_002951.2 :1688004-1689234 | q1 | q2 | OK | 160.293 | 56.4446 | -1.50581 | 2.30778  | 0.0210113 | 0.340384 |
| gene1645 | gene1645 | SACOL1679 | gi 57650036 ref NC_002951.2 :1709623-1709770 | q1 | q2 | OK | 801.742 | 2750.3  | 1.77838  | -3.27863 | 0.0010431 | 0.054568 |
| gene1646 | gene1646 | SACOL1680 | gi 57650036 ref NC_002951.2 :1709809-1709992 | q1 | q2 | OK | 73.0734 | 279.704 | 1.93648  | -2.78906 | 0.0052862 | 0.144433 |
| gene1655 | gene1655 | apt       | gi 57650036 ref NC_002951.2 :1720725-1721244 | q1 | q2 | OK | 121.619 | 58.9815 | -1.04404 | 2.13158  | 0.0330411 | 0.42162  |
| gene1658 | gene1658 | yajC      | gi 57650036 ref NC_002951.2 :1726295-1726556 | q1 | q2 | OK | 256.116 | 111.53  | -1.19937 | 2.35254  | 0.0186457 | 0.315668 |
| gene1665 | gene1665 | rpmA      | gi 57650036 ref NC_002951.2 :1732530-1732815 | q1 | q2 | OK | 1951.32 | 508.22  | -1.94093 | 2.76983  | 0.0056085 | 0.151098 |
| gene1666 | gene1666 | SACOL1701 | gi 57650036 ref NC_002951.2 :1732826-1733147 | q1 | q2 | OK | 506.413 | 164.242 | -1.62449 | 3.13114  | 0.0017413 | 0.076708 |
| gene1667 | gene1667 | rplU      | gi 57650036 ref NC_002951.2 :1733152-1733461 | q1 | q2 | OK | 2020.7  | 674.066 | -1.58389 | 2.07201  | 0.0382645 | 0.45109  |
| gene1670 | gene1670 | SACOL1705 | gi 57650036 ref NC_002951.2 :1735392-1735866 | q1 | q2 | OK | 92.1667 | 45.3944 | -1.02173 | 2.06528  | 0.0388962 | 0.454271 |
| gene1676 | gene1676 | SACOL1711 | gi 57650036 ref NC_002951.2 :1742668-1743229 | q1 | q2 | OK | 229.848 | 91.934  | -1.32201 | 2.46942  | 0.0135331 | 0.270921 |
| gene1689 | gene1689 | rplT      | gi 57650036 ref NC_002951.2 :1756408-1756765 | q1 | q2 | OK | 154.519 | 70.5238 | -1.1316  | 2.27716  | 0.0227766 | 0.342468 |
| gene1693 | gene1693 | thrS      | gi 57650036 ref NC_002951.2 :1759715-1761653 | q1 | q2 | OK | 299.764 | 64.8701 | -2.2082  | 2.53061  | 0.0113865 | 0.247006 |
| gene1696 | gene1696 | nrdR      | gi 57650036 ref NC_002951.2 :1764386-1764857 | q1 | q2 | OK | 307.595 | 114.208 | -1.42937 | 2.65368  | 0.0079619 | 0.196004 |
| gene1716 | gene1716 | SACOL1753 | gi 57650036 ref NC_002951.2 :1794539-1794953 | q1 | q2 | OK | 490.685 | 98.3259 | -2.31915 | 4.0179   | 5.87E-05  | 0.008673 |
| gene1720 | gene1720 | ald2      | gi 57650036 ref NC_002951.2 :1797491-1798610 | q1 | q2 | OK | 580.652 | 153.249 | -1.92179 | 2.12903  | 0.0332518 | 0.421693 |
| gene1723 | gene1723 | SACOL1761 | gi 57650036 ref NC_002951.2 :1800786-1801734 | q1 | q2 | OK | 138.039 | 448.075 | 1.69867  | -2.08179 | 0.0373615 | 0.444619 |
| gene173  | gene173  | SACOL0179 | gi 57650036 ref NC_002951.2 :206626-207502   | q1 | q2 | OK | 86.1906 | 41.0105 | -1.07154 | 2.13915  | 0.0324234 | 0.420136 |
| gene1731 | gene1731 | rpsD      | gi 57650036 ref NC_002951.2 :1808535-1809138 | q1 | q2 | OK | 166.82  | 78.0286 | -1.09622 | 2.13664  | 0.0326271 | 0.420136 |
| gene1738 | gene1738 | SACOL1776 | gi 57650036 ref NC_002951.2 :1816468-1817086 | q1 | q2 | OK | 61.8188 | 27.9487 | -1.14526 | 2.30308  | 0.0212745 | 0.341601 |
| gene1745 | gene1745 | acuA      | gi 57650036 ref NC_002951.2 :1828380-1829013 | q1 | q2 | OK | 157.026 | 66.0762 | -1.2488  | 2.43369  | 0.0149458 | 0.287414 |
| gene175  | gene175  | SACOL0181 | gi 57650036 ref NC_002951.2 :211183-212026   | q1 | q2 | OK | 167.786 | 59.0823 | -1.50582 | 2.64822  | 0.0080918 | 0.197267 |
| gene1759 | gene1759 | trmB      | gi 57650036 ref NC_002951.2 :1845831-1846476 | q1 | q2 | OK | 477.903 | 153.323 | -1.64015 | 2.29637  | 0.0216549 | 0.342403 |
| gene1760 | gene1760 | SACOL1799 | gi 57650036 ref NC_002951.2 :1846490-1847282 | q1 | q2 | OK | 457.157 | 136.519 | -1.74359 | 2.2826   | 0.0224538 | 0.342403 |
| gene1777 | gene1777 | putA      | gi 57650036 ref NC_002951.2 :1871485-1872487 | q1 | q2 | OK | 304.813 | 91.5212 | -1.73575 | 2.35467  | 0.018539  | 0.315668 |
| gene1797 | gene1797 | SACOL1836 | gi 57650036 ref NC_002951.2 :1890533-1891442 | q1 | q2 | OK | 169.379 | 68.098  | -1.31457 | 2.22485  | 0.0260916 | 0.37225  |
| gene1842 | gene1842 | SACOL1883 | gi 57650036 ref NC_002951.2 :1937942-1938731 | q1 | q2 | OK | 173.453 | 76.1223 | -1.18815 | 2.10536  | 0.0352598 | 0.436145 |
| gene1872 | gene1872 | SACOL1907 | gi 57650036 ref NC_002951.2 :1962281-1963103 | q1 | q2 | OK | 108.904 | 45.0949 | -1.27202 | 2.48831  | 0.0128352 | 0.262026 |
| gene1878 | gene1878 | SACOL1913 | gi 57650036 ref NC_002951.2 :1967253-1967724 | q1 | q2 | OK | 137.135 | 61.4614 | -1.15784 | 2.35716  | 0.0184151 | 0.315668 |
| gene1881 | gene1881 | SACOL1916 | gi 57650036 ref NC_002951.2 :1969006-1971179 | q1 | q2 | OK | 222.523 | 44.2797 | -2.32924 | 2.3799   | 0.0173174 | 0.308397 |
| gene1918 | gene1918 | SACOL1923 | gi 57650036 ref NC_002951.2 :1986434-1987529 | q1 | q2 | OK | 187.165 | 61.1728 | -1.61335 | 2.4678   | 0.0135946 | 0.270921 |
| gene1920 | gene1920 | SACOL1925 | gi 57650036 ref NC_002951.2 :1989746-1990289 | q1 | q2 | OK | 136.077 | 48.8137 | -1.47906 | 2.97308  | 0.0029483 | 0.105384 |
| gene1927 | gene1927 | SACOL1932 | gi 57650036 ref NC_002951.2 :1996765-1997575 | q1 | q2 | OK | 175.705 | 57.9739 | -1.59968 | 2.82116  | 0.0047851 | 0.139714 |

|          |          |           |                                              |    |    |    |         |         |          |          |           |          |
|----------|----------|-----------|----------------------------------------------|----|----|----|---------|---------|----------|----------|-----------|----------|
| gene1980 | gene1980 | SACOL1986 | gi 57650036 ref NC_002951.2 :2049702-2050104 | q1 | q2 | OK | 37.7427 | 80.1883 | 1.08719  | -2.11374 | 0.0345377 | 0.435799 |
| gene1981 | gene1981 | SACOL1987 | gi 57650036 ref NC_002951.2 :2050676-2050850 | q1 | q2 | OK | 62.2804 | 222.993 | 1.84015  | -2.33492 | 0.0195478 | 0.325064 |
| gene1985 | gene1985 | SACOL1991 | gi 57650036 ref NC_002951.2 :2053853-2054378 | q1 | q2 | OK | 45.4879 | 101.215 | 1.15388  | -2.35317 | 0.0186144 | 0.315668 |
| gene2012 | gene2012 | SACOL2021 | gi 57650036 ref NC_002951.2 :2081385-2082171 | q1 | q2 | OK | 178.232 | 66.6368 | -1.41937 | 2.51329  | 0.011961  | 0.249708 |
| gene2013 | gene2013 | hld       | gi 57650036 ref NC_002951.2 :2082767-2082902 | q1 | q2 | OK | 2039.17 | 101.074 | -4.3345  | 3.60698  | 0.0003098 | 0.026823 |
| gene205  | gene205  | SACOL0211 | gi 57650036 ref NC_002951.2 :248020-249342   | q1 | q2 | OK | 414.789 | 108.062 | -1.94052 | 2.28167  | 0.0225087 | 0.342403 |
| gene2050 | gene2050 | rsbU      | gi 57650036 ref NC_002951.2 :2122863-2123865 | q1 | q2 | OK | 128.671 | 57.6245 | -1.15893 | 2.0531   | 0.040063  | 0.459353 |
| gene2051 | gene2051 | SACOL2058 | gi 57650036 ref NC_002951.2 :2124214-2124744 | q1 | q2 | OK | 346.599 | 116.571 | -1.57206 | 3.04757  | 0.002307  | 0.095895 |
| gene206  | gene206  | SACOL0212 | gi 57650036 ref NC_002951.2 :249371-251633   | q1 | q2 | OK | 345.759 | 86.9452 | -1.99159 | 2.0964   | 0.0360471 | 0.441533 |
| gene2065 | gene2065 | SACOL2072 | gi 57650036 ref NC_002951.2 :2137442-2138963 | q1 | q2 | OK | 216.427 | 65.2199 | -1.7305  | 2.24143  | 0.0249982 | 0.367079 |
| gene207  | gene207  | SACOL0213 | gi 57650036 ref NC_002951.2 :251818-253030   | q1 | q2 | OK | 443.622 | 113.322 | -1.96891 | 2.28437  | 0.0223498 | 0.342403 |
| gene208  | gene208  | SACOL0214 | gi 57650036 ref NC_002951.2 :253141-254647   | q1 | q2 | OK | 439.614 | 103.236 | -2.09029 | 2.31821  | 0.020438  | 0.333246 |
| gene2080 | gene2080 | SACOL2088 | gi 57650036 ref NC_002951.2 :2151897-2152593 | q1 | q2 | OK | 26.113  | 65.9535 | 1.33668  | -2.70402 | 0.0068506 | 0.172504 |
| gene2086 | gene2086 | atpC      | gi 57650036 ref NC_002951.2 :2156714-2157119 | q1 | q2 | OK | 361.348 | 137.991 | -1.38881 | 2.62966  | 0.0085472 | 0.202471 |
| gene2092 | gene2092 | atpE      | gi 57650036 ref NC_002951.2 :2162257-2162470 | q1 | q2 | OK | 529.932 | 183.823 | -1.52749 | 2.92328  | 0.0034636 | 0.119139 |
| gene2104 | gene2104 | rpmE2     | gi 57650036 ref NC_002951.2 :2171877-2172132 | q1 | q2 | OK | 205.232 | 64.5679 | -1.66837 | 3.04464  | 0.0023296 | 0.095895 |
| gene2105 | gene2105 | rho       | gi 57650036 ref NC_002951.2 :2172249-2173566 | q1 | q2 | OK | 300.718 | 97.8186 | -1.62023 | 1.97533  | 0.0482313 | 0.498616 |
| gene2109 | gene2109 | fbaA      | gi 57650036 ref NC_002951.2 :2177626-2178487 | q1 | q2 | OK | 458.344 | 117.759 | -1.9606  | 2.51767  | 0.0118135 | 0.249708 |
| gene2112 | gene2112 | rpoE      | gi 57650036 ref NC_002951.2 :2181280-2181811 | q1 | q2 | OK | 308.66  | 122.252 | -1.33616 | 2.35135  | 0.0187054 | 0.315668 |
| gene2115 | gene2115 | SACOL2123 | gi 57650036 ref NC_002951.2 :2184139-2184811 | q1 | q2 | OK | 133.119 | 56.7559 | -1.22987 | 2.4266   | 0.0152412 | 0.288253 |
| gene2119 | gene2119 | SACOL2127 | gi 57650036 ref NC_002951.2 :2188519-2188870 | q1 | q2 | OK | 327.502 | 128     | -1.35536 | 2.70308  | 0.00687   | 0.172504 |
| gene2121 | gene2121 | deoC2     | gi 57650036 ref NC_002951.2 :2190463-2191126 | q1 | q2 | OK | 425.131 | 141.244 | -1.58971 | 2.27952  | 0.0226359 | 0.342403 |
| gene2129 | gene2129 | czrA      | gi 57650036 ref NC_002951.2 :2198281-2198602 | q1 | q2 | OK | 1056.99 | 68.7525 | -3.94241 | 6.09331  | 1.11E-09  | 2.78E-06 |
| gene2130 | gene2130 | SACOL2138 | gi 57650036 ref NC_002951.2 :2198603-2199584 | q1 | q2 | OK | 453.384 | 51.5199 | -3.13753 | 4.02882  | 5.61E-05  | 0.008673 |
| gene215  | gene215  | ldh1      | gi 57650036 ref NC_002951.2 :262249-263203   | q1 | q2 | OK | 313.588 | 51.7802 | -2.5984  | 3.65575  | 0.0002564 | 0.024307 |
| gene2164 | gene2164 | SACOL2163 | gi 57650036 ref NC_002951.2 :2241856-2242117 | q1 | q2 | OK | 3964.78 | 1178.56 | -1.75022 | 2.15566  | 0.0311101 | 0.418808 |
| gene2168 | gene2168 | SACOL2167 | gi 57650036 ref NC_002951.2 :2245862-2246846 | q1 | q2 | OK | 136.905 | 34.6581 | -1.98191 | 3.51257  | 0.0004438 | 0.03217  |
| gene2175 | gene2175 | SACOL2174 | gi 57650036 ref NC_002951.2 :2256017-2256257 | q1 | q2 | OK | 1656.24 | 5434.36 | 1.7142   | -2.09371 | 0.0362858 | 0.442299 |
| gene2198 | gene2198 | SACOL2197 | gi 57650036 ref NC_002951.2 :2278882-2279308 | q1 | q2 | OK | 117.05  | 448.372 | 1.93757  | -3.45464 | 0.000551  | 0.03459  |
| gene2205 | gene2205 | SACOL2204 | gi 57650036 ref NC_002951.2 :2285937-2286729 | q1 | q2 | OK | 146.817 | 70.1045 | -1.06644 | 1.97338  | 0.0484518 | 0.498616 |
| gene2207 | gene2207 | rpsI      | gi 57650036 ref NC_002951.2 :2288673-2289072 | q1 | q2 | OK | 707.357 | 120.421 | -2.55435 | 4.04679  | 5.19E-05  | 0.008673 |
| gene2208 | gene2208 | rplM      | gi 57650036 ref NC_002951.2 :2289085-2289523 | q1 | q2 | OK | 444.286 | 100.481 | -2.14456 | 3.72675  | 0.000194  | 0.020293 |
| gene2213 | gene2213 | rplQ      | gi 57650036 ref NC_002951.2 :2293570-2293939 | q1 | q2 | OK | 845.398 | 188.038 | -2.16861 | 3.3929   | 0.0006916 | 0.040697 |

|          |          |           |                                              |    |    |    |         |         |             |             |           |          |
|----------|----------|-----------|----------------------------------------------|----|----|----|---------|---------|-------------|-------------|-----------|----------|
| gene2214 | gene2214 | rpoA      | gi 57650036 ref NC_002951.2 :2293955-2294900 | q1 | q2 | OK | 898.634 | 223.098 | -2.01006    | 2.13765     | 0.0325452 | 0.420136 |
| gene2215 | gene2215 | rpsK      | gi 57650036 ref NC_002951.2 :2294974-2295364 | q1 | q2 | OK | 692.733 | 174.753 | -1.98698    | 3.20089     | 0.00137   | 0.063706 |
| gene2216 | gene2216 | rpsM      | gi 57650036 ref NC_002951.2 :2295387-2295753 | q1 | q2 | OK | 1062.13 | 276.93  | -1.93937    | 2.82962     | 0.0046603 | 0.137671 |
| gene2218 | gene2218 | infA      | gi 57650036 ref NC_002951.2 :2295920-2296139 | q1 | q2 | OK | 728.922 | 267.441 | -1.44654    | 2.87933     | 0.0039852 | 0.12949  |
| gene2219 | gene2219 | adk       | gi 57650036 ref NC_002951.2 :2296331-2296979 | q1 | q2 | OK | 484.807 | 150.629 | -1.68641    | 2.35083     | 0.0187314 | 0.315668 |
| gene2222 | gene2222 | rpmD      | gi 57650036 ref NC_002951.2 :2298744-2298924 | q1 | q2 | OK | 879.873 | 203.032 | -2.11559    | 3.65086     | 0.0002614 | 0.024307 |
| gene2223 | gene2223 | rpsE      | gi 57650036 ref NC_002951.2 :2298940-2299441 | q1 | q2 | OK | 990.553 | 174.902 | -2.50169    | 3.25762     | 0.0011235 | 0.055909 |
| gene2224 | gene2224 | rplR      | gi 57650036 ref NC_002951.2 :2299461-2299821 | q1 | q2 | OK | 1774.18 | 307.901 | -2.52661    | 3.27274     | 0.0010651 | 0.054581 |
| gene2225 | gene2225 | rplF      | gi 57650036 ref NC_002951.2 :2299851-2300388 | q1 | q2 | OK | 739.26  | 141.456 | -2.38573    | 3.25459     | 0.0011356 | 0.055909 |
| gene2226 | gene2226 | rpsH      | gi 57650036 ref NC_002951.2 :2300412-2300811 | q1 | q2 | OK | 620.321 | 124.7   | -2.31455    | 3.81636     | 0.0001354 | 0.017004 |
| gene2227 | gene2227 | rpsN      | gi 57650036 ref NC_002951.2 :2300842-2301028 | q1 | q2 | OK | 343.4   | 93.0463 | -1.88387    | 2.81548     | 0.0048705 | 0.140572 |
| gene2228 | gene2228 | rplE      | gi 57650036 ref NC_002951.2 :2301050-2301590 | q1 | q2 | OK | 730.472 | 125.465 | -2.54155    | 3.48198     | 0.0004977 | 0.033219 |
| gene2229 | gene2229 | rplX      | gi 57650036 ref NC_002951.2 :2301616-2301934 | q1 | q2 | OK | 1592.56 | 317.187 | -2.32794    | 3.3023      | 0.0009589 | 0.051232 |
| gene2230 | gene2230 | rplN      | gi 57650036 ref NC_002951.2 :2301969-2302338 | q1 | q2 | OK | 710.574 | 151.14  | -2.2331     | 3.68695     | 0.000227  | 0.022796 |
| gene2231 | gene2231 | rpsQ      | gi 57650036 ref NC_002951.2 :2302369-2302633 | q1 | q2 | OK | 1488.86 | 298.801 | -2.31695    | 3.82653     | 0.00013   | 0.017004 |
| gene2233 | gene2233 | rplP      | gi 57650036 ref NC_002951.2 :2302656-2303290 | q1 | q2 | OK | 956.45  | 200.207 | -2.2562     | 2.88282     | 0.0039414 | 0.12949  |
| gene2234 | gene2234 | rpsC      | gi 57650036 ref NC_002951.2 :2303292-2303946 | q1 | q2 | OK | 617.107 | 145.344 | -2.08604    | 2.7425      | 0.0060974 | 0.157851 |
| gene2235 | gene2235 | rplV      | gi 57650036 ref NC_002951.2 :2303969-2304323 | q1 | q2 | OK | 675.654 | 160.485 | -2.07384    | 3.55854     | 0.0003729 | 0.03007  |
| gene2236 | gene2236 | rpsS      | gi 57650036 ref NC_002951.2 :2304351-2304630 | q1 | q2 | OK | 817.258 | 203.366 | -2.00671    | 3.73728     | 0.000186  | 0.020293 |
| gene2237 | gene2237 | rplB      | gi 57650036 ref NC_002951.2 :2304696-2305530 | q1 | q2 | OK | 431.403 | 139.696 | -1.62675    | 2.10679     | 0.0351362 | 0.436145 |
| gene225  | gene225  | SACOL0234 | gi 57650036 ref NC_002951.2 :272097-272244   | q1 | q2 | OK | 80.1742 | 0       | -1.79769e+3 | -1.79769e+3 | 0.0370172 | 0.444619 |
| gene2256 | gene2256 | sarV      | gi 57650036 ref NC_002951.2 :2324349-2324700 | q1 | q2 | OK | 90.3016 | 36.908  | -1.29082    | 2.42294     | 0.0153956 | 0.288253 |
| gene2275 | gene2275 | SACOL2277 | gi 57650036 ref NC_002951.2 :2337937-2338846 | q1 | q2 | OK | 266.413 | 101.419 | -1.39334    | 2.01782     | 0.0436102 | 0.47611  |
| gene2287 | gene2287 | sarY      | gi 57650036 ref NC_002951.2 :2347997-2348741 | q1 | q2 | OK | 19.1055 | 39.3453 | 1.0422      | -2.07542    | 0.0379474 | 0.449462 |
| gene2288 | gene2288 | SACOL2290 | gi 57650036 ref NC_002951.2 :2348766-2350722 | q1 | q2 | OK | 25.877  | 55.1877 | 1.09268     | -1.98276    | 0.047394  | 0.493802 |
| gene2293 | gene2293 | SACOL2295 | gi 57650036 ref NC_002951.2 :2356051-2356552 | q1 | q2 | OK | 147.381 | 893.618 | 2.60011     | -3.51186    | 0.000445  | 0.03217  |
| gene2296 | gene2296 | SACOL2298 | gi 57650036 ref NC_002951.2 :2359393-2360170 | q1 | q2 | OK | 102.133 | 46.5065 | -1.13494    | 2.26067     | 0.0237797 | 0.353318 |
| gene2305 | gene2305 | SACOL2307 | gi 57650036 ref NC_002951.2 :2369068-2369398 | q1 | q2 | OK | 31.6333 | 69.951  | 1.1449      | -2.05376    | 0.0399993 | 0.459353 |
| gene2330 | gene2330 | galM      | gi 57650036 ref NC_002951.2 :2393733-2394859 | q1 | q2 | OK | 93.884  | 45.0138 | -1.06051    | 2.02679     | 0.0426838 | 0.472836 |
| gene2350 | gene2350 | tcaR      | gi 57650036 ref NC_002951.2 :2412777-2413233 | q1 | q2 | OK | 85.8593 | 40.6424 | -1.07899    | 2.15465     | 0.0311896 | 0.418808 |
| gene2352 | gene2352 | SACOL2355 | gi 57650036 ref NC_002951.2 :2414970-2415327 | q1 | q2 | OK | 16.6216 | 40.191  | 1.27382     | -2.08853    | 0.0367502 | 0.444619 |
| gene2360 | gene2360 | SACOL2363 | gi 57650036 ref NC_002951.2 :2422345-2423944 | q1 | q2 | OK | 375.285 | 49.7694 | -2.91466    | 3.47893     | 0.0005034 | 0.033219 |
| gene2370 | gene2370 | SACOL2374 | gi 57650036 ref NC_002951.2 :2432564-2433188 | q1 | q2 | OK | 91.5047 | 43.1511 | -1.08445    | 2.2133      | 0.0268769 | 0.377263 |

|          |          |           |                                              |    |    |    |         |         |             |             |           |          |
|----------|----------|-----------|----------------------------------------------|----|----|----|---------|---------|-------------|-------------|-----------|----------|
| gene2387 | gene2387 | SACOL2391 | gi 57650036 ref NC_002951.2 :2449965-2450418 | q1 | q2 | OK | 148.278 | 71.9134 | -1.04397    | 2.13113     | 0.0330781 | 0.42162  |
| gene2403 | gene2403 | SACOL2407 | gi 57650036 ref NC_002951.2 :2467305-2467905 | q1 | q2 | OK | 196.158 | 69.0827 | -1.50562    | 2.85632     | 0.0042858 | 0.131239 |
| gene2437 | gene2437 | SACOL2443 | gi 57650036 ref NC_002951.2 :2502379-2504209 | q1 | q2 | OK | 199.127 | 54.5116 | -1.86905    | 2.35425     | 0.01856   | 0.315668 |
| gene2458 | gene2458 | SACOL2467 | gi 57650036 ref NC_002951.2 :2524250-2524706 | q1 | q2 | OK | 180.99  | 67.2534 | -1.42823    | 2.87124     | 0.0040887 | 0.129958 |
| gene2475 | gene2475 | SACOL2485 | gi 57650036 ref NC_002951.2 :2541822-2542242 | q1 | q2 | OK | 93.5761 | 196.697 | 1.07177     | -2.18618    | 0.0288026 | 0.393061 |
| gene2476 | gene2476 | SACOL2486 | gi 57650036 ref NC_002951.2 :2542259-2542679 | q1 | q2 | OK | 46.0966 | 182.767 | 1.98727     | -3.94486    | 7.98E-05  | 0.011139 |
| gene2477 | gene2477 | SACOL2487 | gi 57650036 ref NC_002951.2 :2542945-2543368 | q1 | q2 | OK | 8.1993  | 20.91   | 1.35062     | -2.02253    | 0.043122  | 0.472836 |
| gene2480 | gene2480 | SACOL2491 | gi 57650036 ref NC_002951.2 :2545143-2545335 | q1 | q2 | OK | 168.375 | 54.9801 | -1.6147     | 2.1517      | 0.0314211 | 0.419308 |
| gene2491 | gene2491 | SACOL2502 | gi 57650036 ref NC_002951.2 :2556602-2556869 | q1 | q2 | OK | 42.4654 | 138.125 | 1.70161     | -2.99916    | 0.0027073 | 0.101128 |
| gene2492 | gene2492 | SACOL2503 | gi 57650036 ref NC_002951.2 :2557012-2557321 | q1 | q2 | OK | 14.0556 | 45.9828 | 1.70995     | -2.5609     | 0.0104402 | 0.238321 |
| gene2495 | gene2495 | sarT      | gi 57650036 ref NC_002951.2 :2563255-2563612 | q1 | q2 | OK | 9.2342  | 25.0246 | 1.43829     | -2.05692    | 0.0396935 | 0.459329 |
| gene2544 | gene2544 | SACOL2556 | gi 57650036 ref NC_002951.2 :2615458-2615677 | q1 | q2 | OK | 3335.71 | 697.257 | -2.25823    | 3.50982     | 0.0004484 | 0.03217  |
| gene2546 | gene2546 | SACOL2559 | gi 57650036 ref NC_002951.2 :2617256-2617514 | q1 | q2 | OK | 79.1206 | 25.9027 | -1.61095    | 2.44845     | 0.0143474 | 0.279274 |
| gene2548 | gene2548 | SACOL2561 | gi 57650036 ref NC_002951.2 :2619623-2620790 | q1 | q2 | OK | 161.726 | 59.7885 | -1.43561    | 2.23403     | 0.025481  | 0.368182 |
| gene2555 | gene2555 | SACOL2568 | gi 57650036 ref NC_002951.2 :2629954-2630122 | q1 | q2 | OK | 44.8521 | 0       | -1.79769e+3 | -1.79769e+3 | 0.0274133 | 0.380118 |
| gene2564 | gene2564 | crtM      | gi 57650036 ref NC_002951.2 :2640353-2641217 | q1 | q2 | OK | 49.5796 | 126.945 | 1.35639     | -2.55652    | 0.0105726 | 0.23854  |
| gene2568 | gene2568 | SACOL2581 | gi 57650036 ref NC_002951.2 :2644535-2645303 | q1 | q2 | OK | 57.7219 | 161.548 | 1.48477     | -2.74248    | 0.0060978 | 0.157851 |
| gene2605 | gene2605 | SACOL2621 | gi 57650036 ref NC_002951.2 :2679183-2679600 | q1 | q2 | OK | 31.7253 | 94.8103 | 1.57941     | -3.06238    | 0.0021959 | 0.095066 |
| gene2633 | gene2633 | SACOL2650 | gi 57650036 ref NC_002951.2 :2709458-2709914 | q1 | q2 | OK | 65.7045 | 30.9656 | -1.08533    | 2.10875     | 0.0349662 | 0.436145 |
| gene2663 | gene2663 | SACOL2681 | gi 57650036 ref NC_002951.2 :2757263-2757623 | q1 | q2 | OK | 121.187 | 328.03  | 1.43659     | -2.8764     | 0.0040224 | 0.12949  |
| gene2722 | gene2722 | rpmH      | gi 57650036 ref NC_002951.2 :2809097-2809235 | q1 | q2 | OK | 1574.83 | 385.782 | -2.02934    | 2.76706     | 0.0056564 | 0.151098 |
| gene289  | gene289  | SACOL0300 | gi 57650036 ref NC_002951.2 :334166-334565   | q1 | q2 | OK | 97.0981 | 44.623  | -1.12165    | 2.21306     | 0.0268937 | 0.377263 |
| gene348  | gene348  | SACOL0360 | gi 57650036 ref NC_002951.2 :371564-372307   | q1 | q2 | OK | 255.091 | 563.527 | 1.14347     | -2.05691    | 0.0396951 | 0.459329 |
| gene392  | gene392  | SACOL0404 | gi 57650036 ref NC_002951.2 :410847-411267   | q1 | q2 | OK | 130.453 | 33.9902 | -1.94034    | 3.77787     | 0.0001582 | 0.018054 |
| gene401  | gene401  | SACOL0413 | gi 57650036 ref NC_002951.2 :419131-419677   | q1 | q2 | OK | 184.082 | 89.1776 | -1.04559    | 2.0512      | 0.0402473 | 0.459368 |
| gene424  | gene424  | rpsF      | gi 57650036 ref NC_002951.2 :442693-442990   | q1 | q2 | OK | 380.694 | 88.8306 | -2.09951    | 4.1046      | 4.05E-05  | 0.008409 |
| gene425  | gene425  | ssb2      | gi 57650036 ref NC_002951.2 :443010-443514   | q1 | q2 | OK | 647.43  | 139.109 | -2.21851    | 3.21928     | 0.0012851 | 0.062057 |
| gene426  | gene426  | rpsR      | gi 57650036 ref NC_002951.2 :443565-443808   | q1 | q2 | OK | 741.716 | 277.036 | -1.42079    | 2.83425     | 0.0045934 | 0.137671 |
| gene431  | gene431  | SACOL0444 | gi 57650036 ref NC_002951.2 :447486-448059   | q1 | q2 | OK | 251.932 | 1000.18 | 1.98915     | -2.40108    | 0.0163466 | 0.299437 |
| gene433  | gene433  | SACOL0446 | gi 57650036 ref NC_002951.2 :448759-449011   | q1 | q2 | OK | 1751.16 | 6201.63 | 1.82434     | -2.06564    | 0.0388626 | 0.454271 |
| gene467  | gene467  | SACOL0480 | gi 57650036 ref NC_002951.2 :482502-482811   | q1 | q2 | OK | 578.761 | 8212.11 | 3.82671     | -4.3713     | 1.24E-05  | 0.005169 |
| gene505  | gene505  | SACOL0519 | gi 57650036 ref NC_002951.2 :524992-525517   | q1 | q2 | OK | 74.7301 | 30.9055 | -1.27383    | 2.53692     | 0.0111834 | 0.246329 |
| gene526  | gene526  | SACOL0537 | gi 57650036 ref NC_002951.2 :546527-546791   | q1 | q2 | OK | 481.69  | 4276.39 | 3.15022     | -4.07065    | 4.69E-05  | 0.008409 |



|         |         |            |                                            |    |    |    |         |         |          |          |           |          |
|---------|---------|------------|--------------------------------------------|----|----|----|---------|---------|----------|----------|-----------|----------|
| gene533 | gene533 | prsA       | gi 57650036 ref NC_002951.2 :551400-552366 | q1 | q2 | OK | 321.052 | 111.597 | -1.5245  | 2.0344   | 0.0419109 | 0.472836 |
| gene540 | gene540 | SACOL0551  | gi 57650036 ref NC_002951.2 :560544-560937 | q1 | q2 | OK | 289.29  | 143.343 | -1.01304 | 2.0073   | 0.0447173 | 0.481552 |
| gene541 | gene541 | SACOL0552  | gi 57650036 ref NC_002951.2 :561041-561443 | q1 | q2 | OK | 778.195 | 160.979 | -2.27325 | 3.48476  | 0.0004926 | 0.033219 |
| gene552 | gene552 | rrfG       | gi 57650036 ref NC_002951.2 :572451-572566 | q1 | q2 | OK | 812920  | 179376  | -2.18013 | 2.46493  | 0.0137041 | 0.270952 |
| gene562 | gene562 | SACOL0564  | gi 57650036 ref NC_002951.2 :584964-585852 | q1 | q2 | OK | 478.115 | 71.438  | -2.74259 | 3.55138  | 0.0003832 | 0.03007  |
| gene563 | gene563 | SACOL0565  | gi 57650036 ref NC_002951.2 :585855-586416 | q1 | q2 | OK | 769.21  | 107.664 | -2.83684 | 3.79799  | 0.0001459 | 0.017442 |
| gene579 | gene579 | nusG       | gi 57650036 ref NC_002951.2 :602755-603304 | q1 | q2 | OK | 309.249 | 123.465 | -1.32467 | 2.29322  | 0.0218354 | 0.342403 |
| gene580 | gene580 | rplK       | gi 57650036 ref NC_002951.2 :603475-603907 | q1 | q2 | OK | 443.873 | 133.662 | -1.73155 | 3.02779  | 0.0024635 | 0.09945  |
| gene581 | gene581 | rplA       | gi 57650036 ref NC_002951.2 :604114-604807 | q1 | q2 | OK | 326.406 | 103.658 | -1.65484 | 2.5481   | 0.010831  | 0.240679 |
| gene582 | gene582 | rplJ       | gi 57650036 ref NC_002951.2 :605078-605579 | q1 | q2 | OK | 488.483 | 120.063 | -2.02451 | 3.20184  | 0.0013655 | 0.063706 |
| gene583 | gene583 | rplL       | gi 57650036 ref NC_002951.2 :605621-605990 | q1 | q2 | OK | 621.463 | 102.179 | -2.60457 | 4.45311  | 8.46E-06  | 0.00425  |
| gene587 | gene587 | SACOL0590  | gi 57650036 ref NC_002951.2 :614435-614690 | q1 | q2 | OK | 249.498 | 69.9485 | -1.83466 | 3.39953  | 0.000675  | 0.040697 |
| gene588 | gene588 | rpsL       | gi 57650036 ref NC_002951.2 :614787-615201 | q1 | q2 | OK | 949.256 | 231.523 | -2.03564 | 2.8813   | 0.0039604 | 0.12949  |
| gene589 | gene589 | rpsG       | gi 57650036 ref NC_002951.2 :615266-615737 | q1 | q2 | OK | 1082.9  | 221.078 | -2.29228 | 2.96982  | 0.0029798 | 0.105384 |
| gene590 | gene590 | fusA       | gi 57650036 ref NC_002951.2 :615859-617941 | q1 | q2 | OK | 1168.91 | 228.806 | -2.35297 | 2.28958  | 0.0220456 | 0.342403 |
| gene596 | gene596 | SACOL0599  | gi 57650036 ref NC_002951.2 :625311-626277 | q1 | q2 | OK | 372.698 | 97.4155 | -1.93578 | 2.52986  | 0.0114109 | 0.247006 |
| gene599 | gene599 | SACOL0602  | gi 57650036 ref NC_002951.2 :627937-628621 | q1 | q2 | OK | 54.5662 | 112.905 | 1.04903  | -2.11061 | 0.0348062 | 0.436145 |
| gene631 | gene631 | eutD       | gi 57650036 ref NC_002951.2 :665746-666733 | q1 | q2 | OK | 309.556 | 94.2145 | -1.71618 | 2.32763  | 0.0199316 | 0.32851  |
| gene632 | gene632 | SACOL0635  | gi 57650036 ref NC_002951.2 :666735-667572 | q1 | q2 | OK | 211.357 | 81.0483 | -1.38283 | 2.252    | 0.0243224 | 0.359256 |
| gene666 | gene666 | SACOL0669  | gi 57650036 ref NC_002951.2 :697383-697890 | q1 | q2 | OK | 815.531 | 174.52  | -2.22435 | 3.01054  | 0.0026079 | 0.100744 |
| gene667 | gene667 | SACOL0670  | gi 57650036 ref NC_002951.2 :698051-698768 | q1 | q2 | OK | 200.684 | 77.7168 | -1.36863 | 2.42092  | 0.0154811 | 0.288253 |
| gene674 | gene674 | SACOL0678  | gi 57650036 ref NC_002951.2 :703024-703585 | q1 | q2 | OK | 41.0127 | 132.483 | 1.69166  | -3.39079 | 0.0006969 | 0.040697 |
| gene708 | gene708 | SACOL0713  | gi 57650036 ref NC_002951.2 :738292-738721 | q1 | q2 | OK | 91.2239 | 41.8754 | -1.12331 | 2.23003  | 0.0257452 | 0.369406 |
| gene715 | gene715 | SACOL0721  | gi 57650036 ref NC_002951.2 :745703-746321 | q1 | q2 | OK | 151.198 | 74.7325 | -1.01664 | 2.00045  | 0.0454512 | 0.481552 |
| gene747 | gene747 | SACOL0755  | gi 57650036 ref NC_002951.2 :777421-777874 | q1 | q2 | OK | 102.654 | 797.407 | 2.95753  | -4.32353 | 1.54E-05  | 0.005508 |
| gene759 | gene759 | SACOL0768  | gi 57650036 ref NC_002951.2 :790261-790702 | q1 | q2 | OK | 114.843 | 381.388 | 1.7316   | -3.17037 | 0.0015225 | 0.069508 |
| gene777 | gene777 | SACOL0788  | gi 57650036 ref NC_002951.2 :811340-812846 | q1 | q2 | OK | 207.788 | 60.8623 | -1.77149 | 2.33892  | 0.0193394 | 0.323741 |
| gene780 | gene780 | SACOL0790. | gi 57650036 ref NC_002951.2 :814957-815224 | q1 | q2 | OK | 64.8777 | 164.508 | 1.34236  | -2.50827 | 0.0121324 | 0.249708 |
| gene801 | gene801 | SACOL0812  | gi 57650036 ref NC_002951.2 :834989-835856 | q1 | q2 | OK | 224.799 | 92.3759 | -1.28305 | 2.00297  | 0.0451809 | 0.481552 |
| gene830 | gene830 | tpiA       | gi 57650036 ref NC_002951.2 :867302-868064 | q1 | q2 | OK | 105.692 | 298.135 | 1.4961   | -2.274   | 0.0229661 | 0.343261 |
| gene833 | gene833 | SACOL0843  | gi 57650036 ref NC_002951.2 :871357-871816 | q1 | q2 | OK | 154.383 | 74.6593 | -1.04812 | 2.13684  | 0.0326112 | 0.420136 |
| gene834 | gene834 | secG       | gi 57650036 ref NC_002951.2 :871882-872116 | q1 | q2 | OK | 605.288 | 269.881 | -1.1653  | 2.35495  | 0.0185251 | 0.315668 |
| gene851 | gene851 | SACOL0861  | gi 57650036 ref NC_002951.2 :888752-888953 | q1 | q2 | OK | 16060.6 | 4299.58 | -1.90126 | 2.14715  | 0.0317815 | 0.419363 |

---

|         |         |           |                                              |    |    |    |         |         |          |          |           |          |
|---------|---------|-----------|----------------------------------------------|----|----|----|---------|---------|----------|----------|-----------|----------|
| gene852 | gene852 | SACOL0862 | gi 57650036 ref NC_002951.2 :889448-889667   | q1 | q2 | OK | 320.014 | 140.088 | -1.1918  | 2.2224   | 0.0262563 | 0.372484 |
| gene863 | gene863 | SACOL0874 | gi 57650036 ref NC_002951.2 :896024-896564   | q1 | q2 | OK | 303.038 | 103.999 | -1.54294 | 2.72138  | 0.0065009 | 0.16657  |
| gene870 | gene870 | SACOL0882 | gi 57650036 ref NC_002951.2 :900795-902509   | q1 | q2 | OK | 107.528 | 38.7344 | -1.47302 | 2.02404  | 0.0429658 | 0.472836 |
| gene875 | gene875 | sei       | gi 57650036 ref NC_002951.2 :905551-906280   | q1 | q2 | OK | 18.998  | 41.3939 | 1.12357  | -2.23354 | 0.0255132 | 0.368182 |
| gene891 | gene891 | SACOL0903 | gi 57650036 ref NC_002951.2 :914463-914682   | q1 | q2 | OK | 366.683 | 124.169 | -1.56223 | 2.88594  | 0.0039024 | 0.12949  |
| gene899 | gene899 | SACOL0911 | gi 57650036 ref NC_002951.2 :918508-918806   | q1 | q2 | OK | 224.912 | 95.7591 | -1.23188 | 1.97421  | 0.0483575 | 0.498616 |
| gene900 | gene900 | SACOL0912 | gi 57650036 ref NC_002951.2 :919636-919831   | q1 | q2 | OK | 9232.35 | 46643.6 | 2.33691  | -2.29229 | 0.0218889 | 0.342403 |
| gene91  | gene91  | spa       | gi 57650036 ref NC_002951.2 :107363-108890   | q1 | q2 | OK | 635.261 | 49.2869 | -3.68807 | 4.26837  | 1.97E-05  | 0.005709 |
| gene92  | gene92  | sarS      | gi 57650036 ref NC_002951.2 :109310-110063   | q1 | q2 | OK | 173.259 | 66.3185 | -1.38545 | 2.51202  | 0.0120041 | 0.249708 |
| gene932 | gene932 | SACOL0945 | gi 57650036 ref NC_002951.2 :946749-948225   | q1 | q2 | OK | 42.9008 | 98.3706 | 1.19722  | -2.00261 | 0.0452188 | 0.481552 |
| gene987 | gene987 | trpS      | gi 57650036 ref NC_002951.2 :1009157-1010147 | q1 | q2 | OK | 179.703 | 74.0431 | -1.27918 | 2.04108  | 0.041243  | 0.468603 |
| gene995 | gene995 | SACOL1009 | gi 57650036 ref NC_002951.2 :1017426-1017774 | q1 | q2 | OK | 217.902 | 77.55   | -1.49048 | 2.99171  | 0.0027742 | 0.101128 |
| gene996 | gene996 | relA1     | gi 57650036 ref NC_002951.2 :1017790-1018426 | q1 | q2 | OK | 214.956 | 84.0178 | -1.35527 | 2.46189  | 0.0138206 | 0.271122 |

---

**Supplementary Table S8. Differentially expressed genes in MU30 compared with M18C06, related to Figure 3b**

| test_id  | gene_id  | gene      | locus                                        | MU30 | M18C06 | status | FPKM(MU30) | FPKM(M18C06) | log2(fold change) | test_stat | p_value  | q_value  |
|----------|----------|-----------|----------------------------------------------|------|--------|--------|------------|--------------|-------------------|-----------|----------|----------|
| gene1001 | gene1001 | fabI      | gi 57650036 ref NC_002951.2 :1023640-1024411 | q1   | q2     | OK     | 600.931    | 92.4728      | -2.7001           | 2.32652   | 0.019991 | 0.517412 |
| gene1024 | gene1024 | SACOL1038 | gi 57650036 ref NC_002951.2 :1046940-1048905 | q1   | q2     | OK     | 2.08526    | 32.6585      | 3.96916           | -2.38339  | 0.017154 | 0.500083 |
| gene1049 | gene1049 | SACOL1064 | gi 57650036 ref NC_002951.2 :1072279-1072750 | q1   | q2     | OK     | 1460.59    | 210.301      | -2.79602          | 2.43272   | 0.014986 | 0.500083 |
| gene1052 | gene1052 | qoxD      | gi 57650036 ref NC_002951.2 :1076195-1076474 | q1   | q2     | OK     | 3956.05    | 202.786      | -4.28603          | 3.04759   | 0.002307 | 0.338293 |
| gene1066 | gene1066 | purN      | gi 57650036 ref NC_002951.2 :1090827-1091394 | q1   | q2     | OK     | 297.926    | 43.7036      | -2.76913          | 1.99881   | 0.045629 | 0.650761 |
| gene1068 | gene1068 | purD      | gi 57650036 ref NC_002951.2 :1092908-1094156 | q1   | q2     | OK     | 367.823    | 56.3242      | -2.70718          | 2.34167   | 0.019198 | 0.51462  |
| gene1073 | gene1073 | SACOL1088 | gi 57650036 ref NC_002951.2 :1098142-1099438 | q1   | q2     | OK     | 731.402    | 120.032      | -2.60724          | 2.20415   | 0.027514 | 0.604847 |
| gene11   | gene11   | SACOL0012 | gi 57650036 ref NC_002951.2 :16111-17101     | q1   | q2     | OK     | 4.45937    | 70.1364      | 3.97525           | -2.37007  | 0.017785 | 0.500083 |
| gene1102 | gene1102 | SACOL1117 | gi 57650036 ref NC_002951.2 :1127031-1127223 | q1   | q2     | OK     | 741.562    | 39.0378      | -4.24762          | 2.06292   | 0.03912  | 0.641477 |
| gene1122 | gene1122 | rpmF      | gi 57650036 ref NC_002951.2 :1145561-1145735 | q1   | q2     | OK     | 6276.17    | 299.573      | -4.38891          | 2.68959   | 0.007154 | 0.480028 |
| gene1123 | gene1123 | isdB      | gi 57650036 ref NC_002951.2 :1145888-1147826 | q1   | q2     | OK     | 3.23945    | 36.4107      | 3.49054           | -2.18925  | 0.028579 | 0.604847 |
| gene1128 | gene1128 | SACOL1144 | gi 57650036 ref NC_002951.2 :1151936-1152902 | q1   | q2     | OK     | 0.575442   | 30.3436      | 5.72058           | -2.78885  | 0.00529  | 0.446636 |
| gene1129 | gene1129 | srtB      | gi 57650036 ref NC_002951.2 :1152963-1153698 | q1   | q2     | OK     | 0.835367   | 21.9951      | 4.71863           | -2.21033  | 0.027082 | 0.604847 |
| gene1139 | gene1139 | trxA      | gi 57650036 ref NC_002951.2 :1165587-1165902 | q1   | q2     | OK     | 4677.83    | 274.225      | -4.09241          | 3.1213    | 0.001801 | 0.338293 |
| gene1162 | gene1162 | SACOL1178 | gi 57650036 ref NC_002951.2 :1182589-1183306 | q1   | q2     | OK     | 3.46337    | 46.6584      | 3.75189           | -1.96202  | 0.049761 | 0.677885 |
| gene1164 | gene1164 | SACOL1180 | gi 57650036 ref NC_002951.2 :1184233-1184959 | q1   | q2     | OK     | 1.2755     | 30.9144      | 4.59915           | -2.22331  | 0.026195 | 0.604847 |
| gene1176 | gene1176 | mraZ      | gi 57650036 ref NC_002951.2 :1195861-1196293 | q1   | q2     | OK     | 809.716    | 120.326      | -2.75047          | 2.1577    | 0.030951 | 0.604847 |
| gene1221 | gene1221 | rpmB      | gi 57650036 ref NC_002951.2 :1246739-1246928 | q1   | q2     | OK     | 41441.2    | 1520.51      | -4.76844          | 3.41754   | 0.000632 | 0.281629 |
| gene1230 | gene1230 | acpP      | gi 57650036 ref NC_002951.2 :1255310-1255544 | q1   | q2     | OK     | 2561.92    | 147.603      | -4.11743          | 2.7226    | 0.006477 | 0.461354 |
| gene1239 | gene1239 | rplS      | gi 57650036 ref NC_002951.2 :1265306-1265657 | q1   | q2     | OK     | 2204.82    | 100.991      | -4.44837          | 3.10244   | 0.001919 | 0.338293 |
| gene125  | gene125  | SACOL0129 | gi 57650036 ref NC_002951.2 :144205-145750   | q1   | q2     | OK     | 1.77815    | 69.247       | 5.2833            | -3.13284  | 0.001731 | 0.338293 |
| gene1254 | gene1254 | rpsB      | gi 57650036 ref NC_002951.2 :1284585-1285350 | q1   | q2     | OK     | 708.198    | 89.9788      | -2.9765           | 2.50684   | 0.012182 | 0.500083 |
| gene1272 | gene1272 | rpsO      | gi 57650036 ref NC_002951.2 :1305225-1305495 | q1   | q2     | OK     | 3677.62    | 402.81       | -3.1906           | 2.5487    | 0.010813 | 0.500083 |
| gene1286 | gene1286 | SACOL1306 | gi 57650036 ref NC_002951.2 :1323249-1323465 | q1   | q2     | OK     | 10284.5    | 762.102      | -3.75434          | 2.81767   | 0.004837 | 0.446636 |
| gene129  | gene129  | SACOL0135 | gi 57650036 ref NC_002951.2 :150450-153060   | q1   | q2     | OK     | 2.50626    | 36.6016      | 3.8683            | -2.47796  | 0.013214 | 0.500083 |
| gene1297 | gene1297 | glpF      | gi 57650036 ref NC_002951.2 :1336107-1336926 | q1   | q2     | OK     | 520.915    | 78.5249      | -2.72983          | 2.32388   | 0.020132 | 0.517412 |
| gene1316 | gene1316 | SACOL1339 | gi 57650036 ref NC_002951.2 :1352649-1353075 | q1   | q2     | OK     | 1.05069    | 29.0865      | 4.79095           | -2.15149  | 0.031437 | 0.604847 |
| gene1325 | gene1325 | SACOL1349 | gi 57650036 ref NC_002951.2 :1356181-1357207 | q1   | q2     | OK     | 5.32413    | 65.1382      | 3.61289           | -2.18658  | 0.028773 | 0.604847 |
| gene1335 | gene1335 | SACOL1359 | gi 57650036 ref NC_002951.2 :1364975-1365566 | q1   | q2     | OK     | 420.916    | 73.9911      | -2.50811          | 1.97709   | 0.048032 | 0.668955 |
| gene1359 | gene1359 | mscL      | gi 57650036 ref NC_002951.2 :1387829-1388192 | q1   | q2     | OK     | 2048.35    | 196.187      | -3.38416          | 2.66303   | 0.007744 | 0.480028 |

|          |          |           |                                              |    |    |    |          |         |          |          |          |          |
|----------|----------|-----------|----------------------------------------------|----|----|----|----------|---------|----------|----------|----------|----------|
| gene1374 | gene1374 | dmpI      | gi 57650036 ref NC_002951.2 :1409698-1409884 | q1 | q2 | OK | 569.086  | 28.5863 | -4.31525 | 2.00262  | 0.045218 | 0.650761 |
| gene1380 | gene1380 | trpD      | gi 57650036 ref NC_002951.2 :1416184-1417183 | q1 | q2 | OK | 4.13214  | 47.8813 | 3.5345   | -2.01252 | 0.044165 | 0.650761 |
| gene1444 | gene1444 | ebh       | gi 57650036 ref NC_002951.2 :1479866-1511363 | q1 | q2 | OK | 4.84265  | 26.0745 | 2.42877  | -2.04033 | 0.041317 | 0.643773 |
| gene1445 | gene1445 | SACOL1475 | gi 57650036 ref NC_002951.2 :1511760-1513152 | q1 | q2 | OK | 4.93608  | 50.229  | 3.34708  | -2.09796 | 0.035909 | 0.626017 |
| gene1446 | gene1446 | SACOL1476 | gi 57650036 ref NC_002951.2 :1513308-1514631 | q1 | q2 | OK | 4.663    | 81.2457 | 4.12296  | -2.60472 | 0.009195 | 0.498321 |
| gene1447 | gene1447 | ilvA1     | gi 57650036 ref NC_002951.2 :1514661-1515702 | q1 | q2 | OK | 3.39718  | 40.8615 | 3.58833  | -1.99645 | 0.045884 | 0.650761 |
| gene1478 | gene1478 | ndk       | gi 57650036 ref NC_002951.2 :1549035-1549485 | q1 | q2 | OK | 477.206  | 58.8786 | -3.0188  | 2.16082  | 0.03071  | 0.604847 |
| gene1482 | gene1482 | hup       | gi 57650036 ref NC_002951.2 :1552268-1552541 | q1 | q2 | OK | 33574.9  | 1985.51 | -4.0798  | 3.3189   | 0.000904 | 0.281629 |
| gene1497 | gene1497 | SACOL1530 | gi 57650036 ref NC_002951.2 :1566820-1567898 | q1 | q2 | OK | 0.651827 | 29.1283 | 5.48179  | -2.24389 | 0.02484  | 0.598406 |
| gene150  | gene150  | SACOL0156 | gi 57650036 ref NC_002951.2 :174334-174538   | q1 | q2 | OK | 1789.06  | 166.587 | -3.42485 | 2.05496  | 0.039883 | 0.641477 |
| gene151  | gene151  | SACOL0157 | gi 57650036 ref NC_002951.2 :174716-175229   | q1 | q2 | OK | 506.843  | 73.2335 | -2.79096 | 2.11692  | 0.034267 | 0.621406 |
| gene1519 | gene1519 | SACOL1553 | gi 57650036 ref NC_002951.2 :1589707-1590079 | q1 | q2 | OK | 2065.1   | 320.197 | -2.68918 | 2.37686  | 0.017461 | 0.500083 |
| gene1545 | gene1545 | SACOL1579 | gi 57650036 ref NC_002951.2 :1614543-1617039 | q1 | q2 | OK | 2.81999  | 32.1947 | 3.51306  | -2.25315 | 0.02425  | 0.592692 |
| gene1574 | gene1574 | rpmG      | gi 57650036 ref NC_002951.2 :1638641-1638791 | q1 | q2 | OK | 5893.29  | 331.367 | -4.15257 | 2.17971  | 0.029279 | 0.604847 |
| gene1598 | gene1598 | rpsU      | gi 57650036 ref NC_002951.2 :1661780-1661957 | q1 | q2 | OK | 39632.5  | 649.809 | -5.93052 | 3.74825  | 0.000178 | 0.14798  |
| gene160  | gene160  | SACOL0166 | gi 57650036 ref NC_002951.2 :191117-191612   | q1 | q2 | OK | 489.979  | 67.9835 | -2.84946 | 2.12215  | 0.033825 | 0.620038 |
| gene1608 | gene1608 | rpsT      | gi 57650036 ref NC_002951.2 :1674065-1674317 | q1 | q2 | OK | 2214.32  | 119.189 | -4.21554 | 2.8015   | 0.005087 | 0.446636 |
| gene1623 | gene1623 | SACOL1657 | gi 57650036 ref NC_002951.2 :1685329-1686034 | q1 | q2 | OK | 0.887426 | 31.955  | 5.17027  | -2.46539 | 0.013686 | 0.500083 |
| gene1636 | gene1636 | SACOL1670 | gi 57650036 ref NC_002951.2 :1698140-1698449 | q1 | q2 | OK | 1957.48  | 342.262 | -2.51582 | 2.1565   | 0.031045 | 0.604847 |
| gene164  | gene164  | rocD1     | gi 57650036 ref NC_002951.2 :194969-196154   | q1 | q2 | OK | 1.77744  | 45.1091 | 4.66554  | -2.59332 | 0.009505 | 0.499638 |
| gene1658 | gene1658 | yajC      | gi 57650036 ref NC_002951.2 :1726295-1726556 | q1 | q2 | OK | 943.994  | 89.089  | -3.40546 | 2.16331  | 0.030518 | 0.604847 |
| gene1665 | gene1665 | rpmA      | gi 57650036 ref NC_002951.2 :1732530-1732815 | q1 | q2 | OK | 3177.65  | 405.961 | -2.96855 | 2.47165  | 0.013449 | 0.500083 |
| gene1671 | gene1671 | SACOL1706 | gi 57650036 ref NC_002951.2 :1736339-1736624 | q1 | q2 | OK | 797.191  | 75.0256 | -3.40947 | 2.19981  | 0.02782  | 0.604847 |
| gene1689 | gene1689 | rpIT      | gi 57650036 ref NC_002951.2 :1756408-1756765 | q1 | q2 | OK | 464.704  | 56.3337 | -3.04424 | 2.0213   | 0.043248 | 0.650674 |
| gene1707 | gene1707 | SACOL1744 | gi 57650036 ref NC_002951.2 :1779633-1781285 | q1 | q2 | OK | 0.598164 | 15.8174 | 4.72483  | -2.36799 | 0.017885 | 0.500083 |
| gene1708 | gene1708 | pyk       | gi 57650036 ref NC_002951.2 :1781925-1783683 | q1 | q2 | OK | 425.706  | 77.4538 | -2.45845 | 2.10668  | 0.035146 | 0.621406 |
| gene1716 | gene1716 | SACOL1753 | gi 57650036 ref NC_002951.2 :1794539-1794953 | q1 | q2 | OK | 1170.93  | 78.5417 | -3.89805 | 2.78488  | 0.005355 | 0.446636 |
| gene1720 | gene1720 | ald2      | gi 57650036 ref NC_002951.2 :1797491-1798610 | q1 | q2 | OK | 645.297  | 122.414 | -2.39819 | 2.07564  | 0.037928 | 0.634589 |
| gene1725 | gene1725 | SACOL1763 | gi 57650036 ref NC_002951.2 :1802448-1803219 | q1 | q2 | OK | 15.9988  | 128.564 | 3.00645  | -1.99257 | 0.046308 | 0.652239 |
| gene1731 | gene1731 | rpsD      | gi 57650036 ref NC_002951.2 :1808535-1809138 | q1 | q2 | OK | 673.904  | 62.3284 | -3.43458 | 2.56972  | 0.010178 | 0.500083 |
| gene1732 | gene1732 | SACOL1770 | gi 57650036 ref NC_002951.2 :1809353-1810097 | q1 | q2 | OK | 1.23138  | 34.8162 | 4.82141  | -2.35262 | 0.018642 | 0.510701 |
| gene1757 | gene1757 | SACOL1796 | gi 57650036 ref NC_002951.2 :1844083-1844395 | q1 | q2 | OK | 1473.09  | 53.8261 | -4.77439 | 3.10122  | 0.001927 | 0.338293 |
| gene1767 | gene1767 | SACOL1806 | gi 57650036 ref NC_002951.2 :1855596-1862157 | q1 | q2 | OK | 3.7076   | 34.5164 | 3.21872  | -2.38895 | 0.016897 | 0.500083 |

|          |          |           |                                              |    |    |    |          |         |          |          |          |          |
|----------|----------|-----------|----------------------------------------------|----|----|----|----------|---------|----------|----------|----------|----------|
| gene1777 | gene1777 | putA      | gi 57650036 ref NC_002951.2 :1871485-1872487 | q1 | q2 | OK | 343.841  | 73.1062 | -2.23368 | 2.00199  | 0.045285 | 0.650761 |
| gene1795 | gene1795 | SACOL1834 | gi 57650036 ref NC_002951.2 :1887816-1889426 | q1 | q2 | OK | 0.308143 | 20.0575 | 6.0244   | -2.97598 | 0.002921 | 0.346711 |
| gene1823 | gene1823 | SACOL1864 | gi 57650036 ref NC_002951.2 :1916576-1917296 | q1 | q2 | OK | 0.430305 | 58.7837 | 7.09391  | -3.47549 | 0.00051  | 0.281629 |
| gene1827 | gene1827 | spIB      | gi 57650036 ref NC_002951.2 :1919937-1920660 | q1 | q2 | OK | 2.56632  | 59.0439 | 4.52401  | -2.37801 | 0.017407 | 0.500083 |
| gene1828 | gene1828 | spIA      | gi 57650036 ref NC_002951.2 :1920784-1921501 | q1 | q2 | OK | 0.432921 | 53.7757 | 6.95671  | -3.38241 | 0.000719 | 0.281629 |
| gene1839 | gene1839 | lukD      | gi 57650036 ref NC_002951.2 :1934670-1935654 | q1 | q2 | OK | 2.52819  | 61.8289 | 4.6121   | -2.60721 | 0.009128 | 0.498321 |
| gene1840 | gene1840 | lukE      | gi 57650036 ref NC_002951.2 :1935655-1936591 | q1 | q2 | OK | 1.79902  | 33.9359 | 4.23753  | -2.18526 | 0.02887  | 0.604847 |
| gene1867 | gene1867 | SACOL1902 | gi 57650036 ref NC_002951.2 :1957825-1958170 | q1 | q2 | OK | 1269.44  | 196.417 | -2.6922  | 2.14547  | 0.031915 | 0.60736  |
| gene190  | gene190  | SACOL0196 | gi 57650036 ref NC_002951.2 :229970-231047   | q1 | q2 | OK | 4.00476  | 60.5968 | 3.91945  | -2.32742 | 0.019943 | 0.517412 |
| gene191  | gene191  | SACOL0197 | gi 57650036 ref NC_002951.2 :231071-232112   | q1 | q2 | OK | 5.22643  | 57.3537 | 3.45599  | -2.0677  | 0.038668 | 0.641477 |
| gene1914 | gene1914 | SACOL1919 | gi 57650036 ref NC_002951.2 :1982817-1983264 | q1 | q2 | OK | 1797.7   | 364.874 | -2.30068 | 2.05587  | 0.039795 | 0.641477 |
| gene1935 | gene1935 | SACOL1940 | gi 57650036 ref NC_002951.2 :2003054-2003330 | q1 | q2 | OK | 1911.6   | 182.137 | -3.39169 | 2.44879  | 0.014334 | 0.500083 |
| gene1954 | gene1954 | gatB      | gi 57650036 ref NC_002951.2 :2020283-2021711 | q1 | q2 | OK | 297.422  | 64.3008 | -2.2096  | 1.98432  | 0.04722  | 0.66135  |
| gene1964 | gene1964 | sspB2     | gi 57650036 ref NC_002951.2 :2034318-2035485 | q1 | q2 | OK | 0.905678 | 24.3622 | 4.7495   | -2.3857  | 0.017047 | 0.500083 |
| gene1976 | gene1976 | ppaC      | gi 57650036 ref NC_002951.2 :2045556-2046486 | q1 | q2 | OK | 492.583  | 89.0548 | -2.4676  | 2.1851   | 0.028882 | 0.604847 |
| gene1981 | gene1981 | SACOL1987 | gi 57650036 ref NC_002951.2 :2050676-2050850 | q1 | q2 | OK | 4950.99  | 178.124 | -4.79676 | 2.78372  | 0.005374 | 0.446636 |
| gene2001 | gene2001 | SACOL2010 | gi 57650036 ref NC_002951.2 :2069986-2070898 | q1 | q2 | OK | 1.55145  | 48.813  | 4.97557  | -2.61574 | 0.008903 | 0.498321 |
| gene2005 | gene2005 | SACOL2014 | gi 57650036 ref NC_002951.2 :2074522-2075113 | q1 | q2 | OK | 2.90688  | 49.1549 | 4.07979  | -2.04534 | 0.040821 | 0.643773 |
| gene2006 | gene2006 | SACOL2015 | gi 57650036 ref NC_002951.2 :2075454-2075929 | q1 | q2 | OK | 0.848615 | 24.9342 | 4.87687  | -2.19321 | 0.028292 | 0.604847 |
| gene2013 | gene2013 | hld       | gi 57650036 ref NC_002951.2 :2082767-2082902 | q1 | q2 | OK | 4326.1   | 80.7366 | -5.7437  | 2.58881  | 0.009631 | 0.499638 |
| gene2021 | gene2021 | SACOL2031 | gi 57650036 ref NC_002951.2 :2089984-2091235 | q1 | q2 | OK | 1.45535  | 41.4324 | 4.83132  | -2.65655 | 0.007895 | 0.480028 |
| gene2023 | gene2023 | SACOL2034 | gi 57650036 ref NC_002951.2 :2091725-2092805 | q1 | q2 | OK | 6.98379  | 65.5743 | 3.23105  | -2.02667 | 0.042696 | 0.64903  |
| gene2060 | gene2060 | kdpB      | gi 57650036 ref NC_002951.2 :2129727-2131755 | q1 | q2 | OK | 5.56385  | 51.065  | 3.19818  | -2.16566 | 0.030337 | 0.604847 |
| gene2061 | gene2061 | kdpA      | gi 57650036 ref NC_002951.2 :2131773-2133450 | q1 | q2 | OK | 2.49847  | 41.7098 | 4.06127  | -2.4518  | 0.014214 | 0.500083 |
| gene2065 | gene2065 | SACOL2072 | gi 57650036 ref NC_002951.2 :2137442-2138963 | q1 | q2 | OK | 285.486  | 52.097  | -2.45415 | 2.17041  | 0.029976 | 0.604847 |
| gene2069 | gene2069 | SACOL2076 | gi 57650036 ref NC_002951.2 :2143706-2143844 | q1 | q2 | OK | 87731.3  | 9073.56 | -3.27335 | 2.52426  | 0.011594 | 0.500083 |
| gene2086 | gene2086 | atpC      | gi 57650036 ref NC_002951.2 :2156714-2157119 | q1 | q2 | OK | 1104.48  | 110.226 | -3.32483 | 2.4962   | 0.012553 | 0.500083 |
| gene2104 | gene2104 | rpmE2     | gi 57650036 ref NC_002951.2 :2171877-2172132 | q1 | q2 | OK | 1011.27  | 51.5762 | -4.29332 | 2.58209  | 0.00982  | 0.499638 |
| gene2119 | gene2119 | SACOL2127 | gi 57650036 ref NC_002951.2 :2188519-2188870 | q1 | q2 | OK | 677.531  | 102.245 | -2.72825 | 1.97185  | 0.048626 | 0.673473 |
| gene2130 | gene2130 | SACOL2138 | gi 57650036 ref NC_002951.2 :2198603-2199584 | q1 | q2 | OK | 269.332  | 41.1536 | -2.71029 | 2.15028  | 0.031533 | 0.604847 |
| gene2132 | gene2132 | SACOL2140 | gi 57650036 ref NC_002951.2 :2199793-2200941 | q1 | q2 | OK | 1039.47  | 145.19  | -2.83984 | 2.36452  | 0.018054 | 0.500083 |
| gene2137 | gene2137 | glmS      | gi 57650036 ref NC_002951.2 :2206326-2208132 | q1 | q2 | OK | 359.337  | 48.5472 | -2.88788 | 2.48065  | 0.013114 | 0.500083 |
| gene2142 | gene2142 | fmtB      | gi 57650036 ref NC_002951.2 :2214388-2221825 | q1 | q2 | OK | 2.81316  | 34.7171 | 3.62538  | -2.61161 | 0.009012 | 0.498321 |

|          |          |           |                                              |    |    |    |          |         |          |          |          |          |
|----------|----------|-----------|----------------------------------------------|----|----|----|----------|---------|----------|----------|----------|----------|
| gene215  | gene215  | ldh1      | gi 57650036 ref NC_002951.2 :262249-263203   | q1 | q2 | OK | 374.626  | 41.3615 | -3.17909 | 2.45501  | 0.014088 | 0.500083 |
| gene217  | gene217  | SACOL0224 | gi 57650036 ref NC_002951.2 :263522-265052   | q1 | q2 | OK | 5.2322   | 56.2966 | 3.42756  | -2.21413 | 0.02682  | 0.604847 |
| gene2173 | gene2173 | SACOL2172 | gi 57650036 ref NC_002951.2 :2253785-2255410 | q1 | q2 | OK | 0.762111 | 22.4857 | 4.88286  | -2.542   | 0.011022 | 0.500083 |
| gene219  | gene219  | SACOL0228 | gi 57650036 ref NC_002951.2 :266687-269236   | q1 | q2 | OK | 2.50843  | 27.9233 | 3.47661  | -2.0285  | 0.042509 | 0.649031 |
| gene2199 | gene2199 | budA1     | gi 57650036 ref NC_002951.2 :2279671-2280376 | q1 | q2 | OK | 2.21856  | 37.0112 | 4.06026  | -2.03043 | 0.042313 | 0.649031 |
| gene2207 | gene2207 | rpsI      | gi 57650036 ref NC_002951.2 :2288673-2289072 | q1 | q2 | OK | 1206.1   | 96.1911 | -3.6483  | 2.66329  | 0.007738 | 0.480028 |
| gene221  | gene221  | SACOL0230 | gi 57650036 ref NC_002951.2 :269258-269537   | q1 | q2 | OK | 2.9413   | 76.3171 | 4.69748  | -2.11402 | 0.034513 | 0.621406 |
| gene2225 | gene2225 | rplF      | gi 57650036 ref NC_002951.2 :2299851-2300388 | q1 | q2 | OK | 652.796  | 112.994 | -2.53039 | 2.11157  | 0.034723 | 0.621406 |
| gene2234 | gene2234 | rpsC      | gi 57650036 ref NC_002951.2 :2303292-2303946 | q1 | q2 | OK | 570.733  | 116.1   | -2.29745 | 2.0406   | 0.04129  | 0.643773 |
| gene2237 | gene2237 | rplB      | gi 57650036 ref NC_002951.2 :2304696-2305530 | q1 | q2 | OK | 605.047  | 111.588 | -2.43887 | 2.16646  | 0.030276 | 0.604847 |
| gene226  | gene226  | SACOL0235 | gi 57650036 ref NC_002951.2 :272267-273311   | q1 | q2 | OK | 5.46768  | 67.7017 | 3.63019  | -2.21815 | 0.026545 | 0.604847 |
| gene2273 | gene2273 | SACOL2275 | gi 57650036 ref NC_002951.2 :2335922-2336477 | q1 | q2 | OK | 10.3115  | 125.69  | 3.60754  | -2.10927 | 0.034922 | 0.621406 |
| gene2307 | gene2307 | SACOL2309 | gi 57650036 ref NC_002951.2 :2371101-2372481 | q1 | q2 | OK | 504.456  | 101.024 | -2.32004 | 2.00511  | 0.044952 | 0.650761 |
| gene2331 | gene2331 | SACOL2333 | gi 57650036 ref NC_002951.2 :2394888-2395215 | q1 | q2 | OK | 11.6329  | 367.788 | 4.98259  | -2.76267 | 0.005733 | 0.446636 |
| gene2378 | gene2378 | SACOL2382 | gi 57650036 ref NC_002951.2 :2441382-2442660 | q1 | q2 | OK | 513.145  | 97.9896 | -2.38866 | 2.07893  | 0.037624 | 0.634426 |
| gene2381 | gene2381 | SACOL2385 | gi 57650036 ref NC_002951.2 :2444266-2444695 | q1 | q2 | OK | 720.832  | 101.207 | -2.83236 | 2.15831  | 0.030903 | 0.604847 |
| gene2394 | gene2394 | nirB      | gi 57650036 ref NC_002951.2 :2458509-2460915 | q1 | q2 | OK | 4.11079  | 48.6552 | 3.5651   | -2.38598 | 0.017034 | 0.500083 |
| gene2419 | gene2419 | bioW      | gi 57650036 ref NC_002951.2 :2482516-2483209 | q1 | q2 | OK | 2.27528  | 49.6806 | 4.44857  | -2.26786 | 0.023337 | 0.582014 |
| gene2422 | gene2422 | bioA      | gi 57650036 ref NC_002951.2 :2485321-2487344 | q1 | q2 | OK | 2.44571  | 38.3469 | 3.97079  | -2.1975  | 0.027985 | 0.604847 |
| gene2425 | gene2425 | SACOL2430 | gi 57650036 ref NC_002951.2 :2487795-2489529 | q1 | q2 | OK | 3.11129  | 32.7547 | 3.39611  | -2.055   | 0.03988  | 0.641477 |
| gene2426 | gene2426 | SACOL2431 | gi 57650036 ref NC_002951.2 :2489553-2491317 | q1 | q2 | OK | 1.66402  | 31.2648 | 4.2318   | -2.43852 | 0.014747 | 0.500083 |
| gene2467 | gene2467 | SACOL2477 | gi 57650036 ref NC_002951.2 :2533932-2535147 | q1 | q2 | OK | 1.07729  | 23.6387 | 4.45568  | -2.26498 | 0.023514 | 0.582014 |
| gene2469 | gene2469 | SACOL2479 | gi 57650036 ref NC_002951.2 :2536055-2536877 | q1 | q2 | OK | 0.713916 | 23.7939 | 5.05869  | -2.39939 | 0.016422 | 0.500083 |
| gene251  | gene251  | SACOL0261 | gi 57650036 ref NC_002951.2 :298737-300114   | q1 | q2 | OK | 4.81508  | 48.737  | 3.33939  | -2.0785  | 0.037664 | 0.634426 |
| gene2518 | gene2518 | SACOL2530 | gi 57650036 ref NC_002951.2 :2592084-2593053 | q1 | q2 | OK | 4.29844  | 71.8751 | 4.06361  | -2.41052 | 0.01593  | 0.500083 |
| gene2544 | gene2544 | SACOL2556 | gi 57650036 ref NC_002951.2 :2615458-2615677 | q1 | q2 | OK | 15413.5  | 556.962 | -4.79047 | 3.35227  | 0.000802 | 0.281629 |
| gene2545 | gene2545 | SACOL2557 | gi 57650036 ref NC_002951.2 :2616065-2616497 | q1 | q2 | OK | 374.736  | 45.3341 | -3.04721 | 2.08167  | 0.037373 | 0.634426 |
| gene2548 | gene2548 | SACOL2561 | gi 57650036 ref NC_002951.2 :2619623-2620790 | q1 | q2 | OK | 266.949  | 47.7584 | -2.48273 | 2.12504  | 0.033584 | 0.620038 |
| gene2551 | gene2551 | feoB      | gi 57650036 ref NC_002951.2 :2624246-2626241 | q1 | q2 | OK | 3.37639  | 45.4664 | 3.75125  | -2.39863 | 0.016456 | 0.500083 |
| gene2553 | gene2553 | SACOL2566 | gi 57650036 ref NC_002951.2 :2626695-2629185 | q1 | q2 | OK | 1.50798  | 24.8155 | 4.04056  | -2.41135 | 0.015894 | 0.500083 |
| gene2568 | gene2568 | SACOL2581 | gi 57650036 ref NC_002951.2 :2644535-2645303 | q1 | q2 | OK | 1013.87  | 129.043 | -2.97396 | 2.55302  | 0.010679 | 0.500083 |
| gene2571 | gene2571 | isaA      | gi 57650036 ref NC_002951.2 :2648750-2649452 | q1 | q2 | OK | 4031.85  | 301.461 | -3.7414  | 3.06179  | 0.0022   | 0.338293 |
| gene2638 | gene2638 | arcD      | gi 57650036 ref NC_002951.2 :2715887-2717318 | q1 | q2 | OK | 3.00752  | 61.5229 | 4.35448  | -2.65788 | 0.007863 | 0.480028 |

|          |          |           |                                              |    |    |    |          |         |          |          |          |          |
|----------|----------|-----------|----------------------------------------------|----|----|----|----------|---------|----------|----------|----------|----------|
| gene2639 | gene2639 | arcB2     | gi 57650036 ref NC_002951.2 :2717408-2718419 | q1 | q2 | OK | 1.62767  | 41.3211 | 4.666    | -2.47082 | 0.01348  | 0.500083 |
| gene2640 | gene2640 | arcA      | gi 57650036 ref NC_002951.2 :2718451-2719687 | q1 | q2 | OK | 0.632964 | 32.0935 | 5.66401  | -2.88093 | 0.003965 | 0.429773 |
| gene2642 | gene2642 | aur       | gi 57650036 ref NC_002951.2 :2720849-2722379 | q1 | q2 | OK | 0.163506 | 8.46802 | 5.69461  | -2.62025 | 0.008787 | 0.498321 |
| gene2713 | gene2713 | SACOL2731 | gi 57650036 ref NC_002951.2 :2801134-2801335 | q1 | q2 | OK | 3539.56  | 413.053 | -3.09917 | 2.12497  | 0.033589 | 0.620038 |
| gene2715 | gene2715 | SACOL2733 | gi 57650036 ref NC_002951.2 :2802290-2802671 | q1 | q2 | OK | 2.67716  | 208.76  | 6.285    | -3.21409 | 0.001309 | 0.338293 |
| gene2722 | gene2722 | rpmH      | gi 57650036 ref NC_002951.2 :2809097-2809235 | q1 | q2 | OK | 6554.64  | 308.159 | -4.41077 | 2.15019  | 0.03154  | 0.604847 |
| gene278  | gene278  | SACOL0288 | gi 57650036 ref NC_002951.2 :326985-327481   | q1 | q2 | OK | 1.56722  | 32.029  | 4.3531   | -2.01804 | 0.043587 | 0.650674 |
| gene304  | gene304  | SACOL0316 | gi 57650036 ref NC_002951.2 :351028-352342   | q1 | q2 | OK | 1.56716  | 47.249  | 4.91406  | -2.77702 | 0.005486 | 0.446636 |
| gene348  | gene348  | SACOL0360 | gi 57650036 ref NC_002951.2 :371564-372307   | q1 | q2 | OK | 8.39935  | 450.14  | 5.74395  | -2.01035 | 0.044394 | 0.650761 |
| gene363  | gene363  | SACOL0375 | gi 57650036 ref NC_002951.2 :380612-381254   | q1 | q2 | OK | 3.57366  | 77.2752 | 4.43453  | -2.37865 | 0.017376 | 0.500083 |
| gene365  | gene365  | SACOL0377 | gi 57650036 ref NC_002951.2 :381858-382209   | q1 | q2 | OK | 1.62477  | 50.1817 | 4.94885  | -2.24197 | 0.024964 | 0.598407 |
| gene367  | gene367  | SACOL0379 | gi 57650036 ref NC_002951.2 :382422-389447   | q1 | q2 | OK | 3.07325  | 40.671  | 3.72616  | -2.3797  | 0.017327 | 0.500083 |
| gene371  | gene371  | SACOL0383 | gi 57650036 ref NC_002951.2 :391344-395267   | q1 | q2 | OK | 1.39247  | 45.9646 | 5.04481  | -2.7676  | 0.005647 | 0.446636 |
| gene377  | gene377  | SACOL0389 | gi 57650036 ref NC_002951.2 :396061-397516   | q1 | q2 | OK | 1.04079  | 43.1753 | 5.37446  | -2.98826 | 0.002806 | 0.346711 |
| gene393  | gene393  | SACOL0405 | gi 57650036 ref NC_002951.2 :411373-412729   | q1 | q2 | OK | 3.58397  | 59.7832 | 4.06011  | -2.49153 | 0.012719 | 0.500083 |
| gene424  | gene424  | rpsF      | gi 57650036 ref NC_002951.2 :442693-442990   | q1 | q2 | OK | 700.035  | 70.9569 | -3.30241 | 2.13832  | 0.032491 | 0.613628 |
| gene426  | gene426  | rpsR      | gi 57650036 ref NC_002951.2 :443565-443808   | q1 | q2 | OK | 1650.31  | 221.293 | -2.8987  | 2.03027  | 0.042329 | 0.649031 |
| gene428  | gene428  | SACOL0441 | gi 57650036 ref NC_002951.2 :445050-445598   | q1 | q2 | OK | 1.97506  | 117.688 | 5.89693  | -3.07387 | 0.002113 | 0.338293 |
| gene448  | gene448  | guaA      | gi 57650036 ref NC_002951.2 :463766-465308   | q1 | q2 | OK | 599.628  | 118.361 | -2.34088 | 1.96522  | 0.049389 | 0.676522 |
| gene456  | gene456  | SACOL0469 | gi 57650036 ref NC_002951.2 :471322-472018   | q1 | q2 | OK | 3.16516  | 68.529  | 4.43636  | -2.37724 | 0.017443 | 0.500083 |
| gene457  | gene457  | SACOL0470 | gi 57650036 ref NC_002951.2 :472308-473367   | q1 | q2 | OK | 0.511382 | 76.1868 | 7.219    | -3.82775 | 0.000129 | 0.14798  |
| gene459  | gene459  | SACOL0472 | gi 57650036 ref NC_002951.2 :473731-474658   | q1 | q2 | OK | 0.91102  | 111.129 | 6.93053  | -3.76192 | 0.000169 | 0.14798  |
| gene460  | gene460  | SACOL0473 | gi 57650036 ref NC_002951.2 :475037-475736   | q1 | q2 | OK | 0.449313 | 26.1884 | 5.86507  | -2.72327 | 0.006464 | 0.461354 |
| gene461  | gene461  | SACOL0474 | gi 57650036 ref NC_002951.2 :476101-476785   | q1 | q2 | OK | 2.31976  | 38.1401 | 4.03926  | -2.01845 | 0.043544 | 0.650674 |
| gene478  | gene478  | SACOL0491 | gi 57650036 ref NC_002951.2 :491047-492250   | q1 | q2 | OK | 3.05336  | 67.5053 | 4.46653  | -2.6723  | 0.007533 | 0.480028 |
| gene493  | gene493  | SACOL0508 | gi 57650036 ref NC_002951.2 :509123-509393   | q1 | q2 | OK | 512.033  | 39.5617 | -3.69406 | 2.07894  | 0.037622 | 0.634426 |
| gene499  | gene499  | gltB      | gi 57650036 ref NC_002951.2 :513657-518157   | q1 | q2 | OK | 7.14281  | 59.0685 | 3.04783  | -2.34432 | 0.019062 | 0.51462  |
| gene508  | gene508  | recR      | gi 57650036 ref NC_002951.2 :527696-528293   | q1 | q2 | OK | 470.215  | 90.5121 | -2.37714 | 1.96607  | 0.049291 | 0.676522 |
| gene534  | gene534  | rplY      | gi 57650036 ref NC_002951.2 :552515-553169   | q1 | q2 | OK | 2062.58  | 154.65  | -3.73737 | 3.10445  | 0.001906 | 0.338293 |
| gene580  | gene580  | rplK      | gi 57650036 ref NC_002951.2 :603475-603907   | q1 | q2 | OK | 641.238  | 106.768 | -2.58638 | 1.99876  | 0.045635 | 0.650761 |
| gene581  | gene581  | rplA      | gi 57650036 ref NC_002951.2 :604114-604807   | q1 | q2 | OK | 1165.85  | 82.801  | -3.81559 | 2.98064  | 0.002876 | 0.346711 |
| gene583  | gene583  | rplL      | gi 57650036 ref NC_002951.2 :605621-605990   | q1 | q2 | OK | 1543.84  | 81.6196 | -4.24146 | 2.95916  | 0.003085 | 0.349558 |
| gene588  | gene588  | rpsL      | gi 57650036 ref NC_002951.2 :614787-615201   | q1 | q2 | OK | 1560.12  | 184.938 | -3.07654 | 2.53299  | 0.01131  | 0.500083 |

|         |         |           |                                              |    |    |    |          |         |          |          |          |          |
|---------|---------|-----------|----------------------------------------------|----|----|----|----------|---------|----------|----------|----------|----------|
| gene589 | gene589 | rpsG      | gi 57650036 ref NC_002951.2 :615266-615737   | q1 | q2 | OK | 2363.33  | 176.595 | -3.74231 | 3.02857  | 0.002457 | 0.340313 |
| gene590 | gene590 | fusA      | gi 57650036 ref NC_002951.2 :615859-617941   | q1 | q2 | OK | 1136.3   | 182.768 | -2.63626 | 2.04442  | 0.040912 | 0.643773 |
| gene591 | gene591 | tuf       | gi 57650036 ref NC_002951.2 :618157-619342   | q1 | q2 | OK | 2226.03  | 370.358 | -2.58748 | 1.99592  | 0.045942 | 0.650761 |
| gene605 | gene605 | sdrC      | gi 57650036 ref NC_002951.2 :632578-635422   | q1 | q2 | OK | 5.46158  | 42.7911 | 2.96992  | -2.09997 | 0.035731 | 0.626017 |
| gene618 | gene618 | SACOL0621 | gi 57650036 ref NC_002951.2 :654745-656122   | q1 | q2 | OK | 2.40754  | 31.6658 | 3.71729  | -2.08734 | 0.036857 | 0.634426 |
| gene648 | gene648 | SACOL0651 | gi 57650036 ref NC_002951.2 :681032-681662   | q1 | q2 | OK | 1.05119  | 22.6709 | 4.43074  | -2.05518 | 0.039862 | 0.641477 |
| gene738 | gene738 | norR      | gi 57650036 ref NC_002951.2 :767868-768312   | q1 | q2 | OK | 1262.2   | 223.944 | -2.49474 | 2.21726  | 0.026605 | 0.604847 |
| gene75  | gene75  | plc       | gi 57650036 ref NC_002951.2 :88186-89173     | q1 | q2 | OK | 1.95864  | 32.9662 | 4.07306  | -2.12425 | 0.033649 | 0.620038 |
| gene750 | gene750 | fruK      | gi 57650036 ref NC_002951.2 :778779-780461   | q1 | q2 | OK | 1.53143  | 82.271  | 5.74743  | -2.45474 | 0.014099 | 0.500083 |
| gene777 | gene777 | SACOL0788 | gi 57650036 ref NC_002951.2 :811340-812846   | q1 | q2 | OK | 332.299  | 48.6162 | -2.77297 | 2.39462  | 0.016638 | 0.500083 |
| gene783 | gene783 | nrdF      | gi 57650036 ref NC_002951.2 :817957-818929   | q1 | q2 | OK | 1385.4   | 245.32  | -2.49756 | 2.05187  | 0.040183 | 0.642147 |
| gene83  | gene83  | SACOL0086 | gi 57650036 ref NC_002951.2 :96318-97707     | q1 | q2 | OK | 7.14825  | 85.2952 | 3.5768   | -2.37428 | 0.017583 | 0.500083 |
| gene834 | gene834 | secG      | gi 57650036 ref NC_002951.2 :871882-872116   | q1 | q2 | OK | 2102.47  | 215.578 | -3.2858  | 2.26391  | 0.023579 | 0.582014 |
| gene844 | gene844 | SACOL0854 | gi 57650036 ref NC_002951.2 :879189-879711   | q1 | q2 | OK | 2.86232  | 68.8006 | 4.58716  | -2.29974 | 0.021463 | 0.545995 |
| gene847 | gene847 | SACOL0857 | gi 57650036 ref NC_002951.2 :883664-885191   | q1 | q2 | OK | 1.80271  | 33.3976 | 4.21151  | -2.38726 | 0.016974 | 0.500083 |
| gene851 | gene851 | SACOL0861 | gi 57650036 ref NC_002951.2 :888752-888953   | q1 | q2 | OK | 25216    | 3434.46 | -2.87618 | 2.47916  | 0.013169 | 0.500083 |
| gene97  | gene97  | SACOL0101 | gi 57650036 ref NC_002951.2 :114649-115648   | q1 | q2 | OK | 0.550952 | 27.1759 | 5.62426  | -2.7293  | 0.006347 | 0.461354 |
| gene972 | gene972 | SACOL0986 | gi 57650036 ref NC_002951.2 :994275-994461   | q1 | q2 | OK | 3505.05  | 251.56  | -3.80046 | 2.32748  | 0.01994  | 0.517412 |
| gene982 | gene982 | SACOL0996 | gi 57650036 ref NC_002951.2 :1003532-1005248 | q1 | q2 | OK | 1.14503  | 34.5171 | 4.91386  | -2.77445 | 0.005529 | 0.446636 |
| gene983 | gene983 | SACOL0997 | gi 57650036 ref NC_002951.2 :1005298-1006285 | q1 | q2 | OK | 0.839418 | 28.632  | 5.0921   | -2.51179 | 0.012012 | 0.500083 |
| gene990 | gene990 | SACOL1004 | gi 57650036 ref NC_002951.2 :1012047-1013034 | q1 | q2 | OK | 1.39903  | 27.844  | 4.31487  | -2.17972 | 0.029278 | 0.604847 |

---



**Supplementary Table S9. Differentially expressed genes in MR150 compared with M36C05, related to Figure 3c**

| test_id  | gene_id  | gene      | locus                                        | MR150 | M36C05 | status | FPKM(MR150) | FPKM(M36C05) | log2(fold_change) | test_stat    | p_value   | q_value   |
|----------|----------|-----------|----------------------------------------------|-------|--------|--------|-------------|--------------|-------------------|--------------|-----------|-----------|
| gene1019 | gene1019 | SACOL1033 | gi 57650036 ref NC_002951.2 :1043318-1043537 | q1    | q2     | OK     | 573.859     | 3799.56      | 2.72706           | -3.42381     | 0.0006175 | 0.0238979 |
| gene1024 | gene1024 | SACOL1038 | gi 57650036 ref NC_002951.2 :1046940-1048905 | q1    | q2     | OK     | 0.607478    | 2.06056      | 1.76213           | -2.28506     | 0.0223091 | 0.282751  |
| gene1025 | gene1025 | SACOL1039 | gi 57650036 ref NC_002951.2 :1048907-1049866 | q1    | q2     | OK     | 0           | 7.84452      | 1.79769e+308      | 1.79769e+308 | 0.0450201 | 0.415575  |
| gene1028 | gene1028 | SACOL1042 | gi 57650036 ref NC_002951.2 :1050522-1050810 | q1    | q2     | OK     | 21.8659     | 5.61968      | -1.96012          | 2.26297      | 0.0236373 | 0.292955  |
| gene1029 | gene1029 | SACOL1043 | gi 57650036 ref NC_002951.2 :1050815-1052297 | q1    | q2     | OK     | 34.2875     | 7.39445      | -2.21317          | 3.08748      | 0.0020186 | 0.057876  |
| gene1030 | gene1030 | SACOL1044 | gi 57650036 ref NC_002951.2 :1052385-1052742 | q1    | q2     | OK     | 87.0651     | 22.117       | -1.97694          | 2.84223      | 0.0044799 | 0.0988909 |
| gene1045 | gene1045 | SACOL1059 | gi 57650036 ref NC_002951.2 :1065903-1066914 | q1    | q2     | OK     | 7.93042     | 23.5229      | 1.56859           | -2.27625     | 0.0228309 | 0.287725  |
| gene1051 | gene1051 | SACOL1066 | gi 57650036 ref NC_002951.2 :1074465-1075659 | q1    | q2     | OK     | 30.9681     | 8.09686      | -1.93535          | 2.75462      | 0.005876  | 0.119116  |
| gene1072 | gene1072 | SACOL1087 | gi 57650036 ref NC_002951.2 :1097856-1097991 | q1    | q2     | OK     | 0           | 343.556      | 1.79769e+308      | 1.79769e+308 | 0.0094397 | 0.161634  |
| gene1075 | gene1075 | SACOL1090 | gi 57650036 ref NC_002951.2 :1101088-1101631 | q1    | q2     | OK     | 37.4748     | 246.264      | 2.71621           | -3.6304      | 0.000283  | 0.0128802 |
| gene1092 | gene1092 | SACOL1107 | gi 57650036 ref NC_002951.2 :1117542-1118082 | q1    | q2     | OK     | 9.00114     | 1.62379      | -2.47075          | 2.89333      | 0.0038118 | 0.0910432 |
| gene1096 | gene1096 | SACOL1111 | gi 57650036 ref NC_002951.2 :1119984-1121867 | q1    | q2     | OK     | 13.842      | 49.833       | 1.84805           | -2.32458     | 0.0200945 | 0.261084  |
| gene110  | gene110  | SACOL0114 | gi 57650036 ref NC_002951.2 :127489-129116   | q1    | q2     | OK     | 0           | 1.34297      | 1.79769e+308      | 1.79769e+308 | 0.0285672 | 0.321026  |
| gene1103 | gene1103 | typA      | gi 57650036 ref NC_002951.2 :1127324-1129172 | q1    | q2     | OK     | 93.3141     | 23.8749      | -1.9666           | 2.43626      | 0.01484   | 0.211829  |
| gene1111 | gene1111 | SACOL1126 | gi 57650036 ref NC_002951.2 :1138351-1138813 | q1    | q2     | OK     | 204.772     | 66.5594      | -1.62131          | 2.21977      | 0.0264341 | 0.309053  |
| gene1116 | gene1116 | SACOL1131 | gi 57650036 ref NC_002951.2 :1141854-1142109 | q1    | q2     | OK     | 40.9563     | 12.3668      | -1.72761          | 2.16794      | 0.0301635 | 0.330747  |
| gene1117 | gene1117 | SACOL1132 | gi 57650036 ref NC_002951.2 :1142111-1142501 | q1    | q2     | OK     | 23.9751     | 5.77234      | -2.05431          | 2.68989      | 0.0071475 | 0.136826  |
| gene1121 | gene1121 | SACOL1136 | gi 57650036 ref NC_002951.2 :1144924-1145482 | q1    | q2     | OK     | 247.933     | 64.1493      | -1.95045          | 2.56498      | 0.0103182 | 0.171267  |
| gene1136 | gene1136 | SACOL1152 | gi 57650036 ref NC_002951.2 :1160750-1161272 | q1    | q2     | OK     | 124.015     | 34.9783      | -1.82598          | 2.55852      | 0.0105119 | 0.172504  |
| gene114  | gene114  | sodA1     | gi 57650036 ref NC_002951.2 :133398-133998   | q1    | q2     | OK     | 248.338     | 62.9228      | -1.98065          | 2.57567      | 0.0100047 | 0.167602  |
| gene1152 | gene1152 | efb       | gi 57650036 ref NC_002951.2 :1176733-1177231 | q1    | q2     | OK     | 180.68      | 57.8039      | -1.64419          | 2.25138      | 0.0243614 | 0.296308  |
| gene1153 | gene1153 | SACOL1169 | gi 57650036 ref NC_002951.2 :1177384-1177735 | q1    | q2     | OK     | 336.183     | 69.4914      | -2.27434          | 3.14222      | 0.0016767 | 0.0507715 |
| gene1154 | gene1154 | SACOL1170 | gi 57650036 ref NC_002951.2 :1178160-1178406 | q1    | q2     | OK     | 0           | 10.2897      | 1.79769e+308      | 1.79769e+308 | 0.0141027 | 0.204943  |
| gene1156 | gene1156 | SACOL1172 | gi 57650036 ref NC_002951.2 :1179363-1179597 | q1    | q2     | OK     | 86.6392     | 30.0025      | -1.52994          | 2.08922      | 0.0366877 | 0.368762  |
| gene1165 | gene1165 | arcB1     | gi 57650036 ref NC_002951.2 :1185396-1186398 | q1    | q2     | OK     | 1.14563     | 4.67492      | 2.02881           | -2.58267     | 0.0098039 | 0.16462   |
| gene1167 | gene1167 | SACOL1183 | gi 57650036 ref NC_002951.2 :1187524-1189081 | q1    | q2     | OK     | 2.14449     | 11.453       | 2.41702           | -3.43746     | 0.0005872 | 0.0229705 |
| gene1179 | gene1179 | pbp1      | gi 57650036 ref NC_002951.2 :1197272-1199874 | q1    | q2     | OK     | 56.4529     | 11.6971      | -2.2709           | 2.45618      | 0.0140425 | 0.204943  |
| gene1180 | gene1180 | mraY      | gi 57650036 ref NC_002951.2 :1200165-1201131 | q1    | q2     | OK     | 35.9832     | 5.75868      | -2.64351          | 3.74746      | 0.0001786 | 0.0092341 |

|          |          |           |                                              |    |    |    |          |         |          |          |           |           |
|----------|----------|-----------|----------------------------------------------|----|----|----|----------|---------|----------|----------|-----------|-----------|
| gene1181 | gene1181 | murD      | gi 57650036 ref NC_002951.2 :1201132-1202482 | q1 | q2 | OK | 49.6751  | 9.29829 | -2.41749 | 3.3213   | 0.000896  | 0.0319428 |
| gene1191 | gene1191 | ileS      | gi 57650036 ref NC_002951.2 :1210895-1213649 | q1 | q2 | OK | 77.4304  | 14.0221 | -2.4652  | 3.01934  | 0.0025333 | 0.0691808 |
| gene1194 | gene1194 | SACOL1209 | gi 57650036 ref NC_002951.2 :1215559-1216968 | q1 | q2 | OK | 42.866   | 13.2099 | -1.69822 | 2.12351  | 0.0337108 | 0.351535  |
| gene1195 | gene1195 | pyrR      | gi 57650036 ref NC_002951.2 :1217367-1217895 | q1 | q2 | OK | 112.423  | 32.6549 | -1.78356 | 2.51148  | 0.0120227 | 0.187518  |
| gene1196 | gene1196 | uraA      | gi 57650036 ref NC_002951.2 :1218112-1219420 | q1 | q2 | OK | 72.0145  | 9.05405 | -2.99165 | 4.02214  | 5.77E-05  | 0.0035981 |
| gene1197 | gene1197 | pyrB      | gi 57650036 ref NC_002951.2 :1219447-1220329 | q1 | q2 | OK | 118.993  | 10.1885 | -3.54587 | 4.75778  | 1.96E-06  | 0.0001995 |
| gene1198 | gene1198 | pyrC      | gi 57650036 ref NC_002951.2 :1220346-1221621 | q1 | q2 | OK | 130.498  | 15.8955 | -3.03734 | 3.89885  | 9.67E-05  | 0.0055513 |
| gene1199 | gene1199 | carA      | gi 57650036 ref NC_002951.2 :1221622-1225889 | q1 | q2 | OK | 102.49   | 8.4439  | -3.60143 | 2.02169  | 0.0432087 | 0.407214  |
| gene1200 | gene1200 | carB      | gi 57650036 ref NC_002951.2 :1221622-1225889 | q1 | q2 | OK | 107.343  | 8.48446 | -3.66125 | 3.79198  | 0.0001495 | 0.0081058 |
| gene1201 | gene1201 | pyrF      | gi 57650036 ref NC_002951.2 :1225998-1227302 | q1 | q2 | OK | 92.8457  | 9.62462 | -3.27003 | 3.58776  | 0.0003335 | 0.0147179 |
| gene1202 | gene1202 | pyrE      | gi 57650036 ref NC_002951.2 :1225998-1227302 | q1 | q2 | OK | 71.3305  | 3.75093 | -4.2492  | 3.19319  | 0.0014071 | 0.0444683 |
| gene1217 | gene1217 | SACOL1232 | gi 57650036 ref NC_002951.2 :1241228-1243963 | q1 | q2 | OK | 84.3085  | 22.7169 | -1.89191 | 2.10597  | 0.0352073 | 0.358866  |
| gene1223 | gene1223 | SACOL1240 | gi 57650036 ref NC_002951.2 :1247759-1249406 | q1 | q2 | OK | 118.34   | 37.705  | -1.65011 | 2.00218  | 0.0452656 | 0.41665   |
| gene1230 | gene1230 | acpP      | gi 57650036 ref NC_002951.2 :1255310-1255544 | q1 | q2 | OK | 1173.82  | 298.025 | -1.97771 | 2.6816   | 0.007327  | 0.137988  |
| gene1236 | gene1236 | rpsP      | gi 57650036 ref NC_002951.2 :1263500-1263776 | q1 | q2 | OK | 280.055  | 57.5055 | -2.28394 | 3.26711  | 0.0010865 | 0.0364367 |
| gene1239 | gene1239 | rplS      | gi 57650036 ref NC_002951.2 :1265306-1265657 | q1 | q2 | OK | 802.277  | 148.296 | -2.43562 | 3.13004  | 0.0017479 | 0.0524863 |
| gene1246 | gene1246 | eprH      | gi 57650036 ref NC_002951.2 :1274120-1275365 | q1 | q2 | OK | 5.27594  | 1.68797 | -1.64414 | 2.26456  | 0.0235394 | 0.292706  |
| gene1254 | gene1254 | rpsB      | gi 57650036 ref NC_002951.2 :1284585-1285350 | q1 | q2 | OK | 279.106  | 59.3596 | -2.23326 | 2.78187  | 0.0054047 | 0.113604  |
| gene1260 | gene1260 | cdsA      | gi 57650036 ref NC_002951.2 :1289006-1289789 | q1 | q2 | OK | 62.5025  | 15.1379 | -2.04575 | 2.8847   | 0.0039179 | 0.0922789 |
| gene1269 | gene1269 | rbfA      | gi 57650036 ref NC_002951.2 :1302688-1303039 | q1 | q2 | OK | 104.127  | 30.0891 | -1.79104 | 2.5922   | 0.0095364 | 0.161634  |
| gene1270 | gene1270 | truB      | gi 57650036 ref NC_002951.2 :1303207-1304125 | q1 | q2 | OK | 11.5163  | 39.7832 | 1.78849  | -2.55629 | 0.0105796 | 0.173222  |
| gene128  | gene128  | SACOL0134 | gi 57650036 ref NC_002951.2 :149516-150001   | q1 | q2 | OK | 0.536604 | 3.48667 | 2.69992  | -2.05792 | 0.0395981 | 0.387684  |
| gene1287 | gene1287 | SACOL1307 | gi 57650036 ref NC_002951.2 :1323638-1324436 | q1 | q2 | OK | 95.5     | 32.4669 | -1.55653 | 2.11807  | 0.0341695 | 0.353769  |
| gene1295 | gene1295 | mutL      | gi 57650036 ref NC_002951.2 :1333085-1335095 | q1 | q2 | OK | 21.0717  | 7.00213 | -1.58944 | 2.23018  | 0.0257352 | 0.304771  |
| gene1296 | gene1296 | glpP      | gi 57650036 ref NC_002951.2 :1335100-1335643 | q1 | q2 | OK | 16.5068  | 4.82871 | -1.77335 | 2.43038  | 0.0150831 | 0.214453  |
| gene130  | gene130  | cap5A     | gi 57650036 ref NC_002951.2 :153404-154073   | q1 | q2 | OK | 2.61118  | 262.128 | 6.64942  | -8.02718 | 8.88E-16  | 6.43E-12  |
| gene1305 | gene1305 | SACOL1327 | gi 57650036 ref NC_002951.2 :1344713-1345952 | q1 | q2 | OK | 23.8788  | 5.72983 | -2.05916 | 2.95419  | 0.0031349 | 0.0801678 |
| gene131  | gene131  | cap5B     | gi 57650036 ref NC_002951.2 :154088-154775   | q1 | q2 | OK | 0.94303  | 124.852 | 7.04869  | -7.76014 | 8.44E-15  | 2.09E-11  |
| gene132  | gene132  | cap5C     | gi 57650036 ref NC_002951.2 :154777-155542   | q1 | q2 | OK | 1.08391  | 95.2877 | 6.45798  | -7.49227 | 6.77E-14  | 7.00E-11  |
| gene1323 | gene1323 | SACOL1347 | gi 57650036 ref NC_002951.2 :1355093-1355435 | q1 | q2 | OK | 3.14579  | 18.181  | 2.53094  | -2.85511 | 0.0043023 | 0.0972982 |
| gene1326 | gene1326 | SACOL1350 | gi 57650036 ref NC_002951.2 :1357476-1357674 | q1 | q2 | OK | 83.5971  | 26.0908 | -1.67991 | 2.05475  | 0.0399033 | 0.389112  |
| gene133  | gene133  | cap5D     | gi 57650036 ref NC_002951.2 :155561-158403   | q1 | q2 | OK | 1.60336  | 85.9854 | 5.74492  | -6.08734 | 1.15E-09  | 3.96E-07  |
| gene134  | gene134  | cap5E     | gi 57650036 ref NC_002951.2 :155561-158403   | q1 | q2 | OK | 1.47777  | 57.9945 | 5.29442  | -3.48321 | 0.0004954 | 0.0200306 |

|          |          |           |                                              |    |    |    |          |         |              |              |           |           |
|----------|----------|-----------|----------------------------------------------|----|----|----|----------|---------|--------------|--------------|-----------|-----------|
| gene1344 | gene1344 | kataA     | gi 57650036 ref NC_002951.2 :1373895-1375317 | q1 | q2 | OK | 537.176  | 2052.29 | 1.93377      | -2.01756     | 0.0436367 | 0.40838   |
| gene135  | gene135  | cap5F     | gi 57650036 ref NC_002951.2 :158415-159525   | q1 | q2 | OK | 1.51458  | 47.6174 | 4.9745       | -6.43694     | 1.22E-10  | 5.19E-08  |
| gene1351 | gene1351 | SACOL1375 | gi 57650036 ref NC_002951.2 :1379597-1379831 | q1 | q2 | OK | 363.326  | 104.009 | -1.80456     | 2.61015      | 0.0090503 | 0.157446  |
| gene1354 | gene1354 | SACOL1378 | gi 57650036 ref NC_002951.2 :1382592-1382920 | q1 | q2 | OK | 484.291  | 80.0577 | -2.59676     | 3.67522      | 0.0002376 | 0.0111637 |
| gene1356 | gene1356 | SACOL1380 | gi 57650036 ref NC_002951.2 :1383013-1383481 | q1 | q2 | OK | 44.4936  | 12.3565 | -1.84833     | 2.65568      | 0.0079148 | 0.14471   |
| gene1357 | gene1357 | sbcd      | gi 57650036 ref NC_002951.2 :1383604-1384726 | q1 | q2 | OK | 8.96923  | 3.34839 | -1.42152     | 2.03924      | 0.0414261 | 0.396038  |
| gene1358 | gene1358 | sbcc      | gi 57650036 ref NC_002951.2 :1384729-1387759 | q1 | q2 | OK | 10.9881  | 3.73784 | -1.55566     | 2.21201      | 0.0269662 | 0.309278  |
| gene136  | gene136  | cap5G     | gi 57650036 ref NC_002951.2 :159528-160653   | q1 | q2 | OK | 2.15226  | 38.3815 | 4.15649      | -5.59662     | 2.19E-08  | 4.52E-06  |
| gene1360 | gene1360 | opuD1     | gi 57650036 ref NC_002951.2 :1388395-1390042 | q1 | q2 | OK | 232.869  | 23.7656 | -3.29257     | 3.91358      | 9.09E-05  | 0.0052649 |
| gene1363 | gene1363 | SACOL1387 | gi 57650036 ref NC_002951.2 :1394492-1394789 | q1 | q2 | OK | 59.3894  | 174.279 | 1.55312      | -2.25528     | 0.0241158 | 0.294807  |
| gene1367 | gene1367 | SACOL1392 | gi 57650036 ref NC_002951.2 :1400621-1402097 | q1 | q2 | OK | 75.3791  | 21.7694 | -1.79186     | 2.326        | 0.0200188 | 0.260836  |
| gene1372 | gene1372 | msrA      | gi 57650036 ref NC_002951.2 :1407981-1408491 | q1 | q2 | OK | 24.1811  | 63.4037 | 1.39069      | -2.01952     | 0.0434331 | 0.40838   |
| gene1374 | gene1374 | dmpI      | gi 57650036 ref NC_002951.2 :1409698-1409884 | q1 | q2 | OK | 314.174  | 104.259 | -1.5914      | 2.24332      | 0.0248763 | 0.299551  |
| gene1378 | gene1378 | trpE      | gi 57650036 ref NC_002951.2 :1414209-1416179 | q1 | q2 | OK | 0.761339 | 2.83118 | 1.89479      | -2.20728     | 0.0272948 | 0.312057  |
| gene1402 | gene1402 | SACOL1427 | gi 57650036 ref NC_002951.2 :1438139-1439741 | q1 | q2 | OK | 28.2947  | 9.51279 | -1.57259     | 2.20008      | 0.0278013 | 0.315942  |
| gene141  | gene141  | cap5L     | gi 57650036 ref NC_002951.2 :164774-165980   | q1 | q2 | OK | 0.913399 | 11.6167 | 3.66881      | -4.72359     | 2.32E-06  | 0.0002266 |
| gene1417 | gene1417 | SACOL1442 | gi 57650036 ref NC_002951.2 :1452884-1453277 | q1 | q2 | OK | 0        | 1.70581 | 1.79769e+308 | 1.79769e+308 | 0.0351354 | 0.35865   |
| gene1418 | gene1418 | brnQ3     | gi 57650036 ref NC_002951.2 :1453629-1454973 | q1 | q2 | OK | 11.1117  | 4.23992 | -1.38997     | 2.02275      | 0.0430992 | 0.407192  |
| gene142  | gene142  | cap5M     | gi 57650036 ref NC_002951.2 :165990-167435   | q1 | q2 | OK | 1.70988  | 10.7944 | 2.65831      | -2.01301     | 0.0441134 | 0.409293  |
| gene1426 | gene1426 | arlR      | gi 57650036 ref NC_002951.2 :1464054-1466066 | q1 | q2 | OK | 17.6373  | 119.478 | 2.76005      | -2.63449     | 0.0084264 | 0.150573  |
| gene143  | gene143  | cap5N     | gi 57650036 ref NC_002951.2 :165990-167435   | q1 | q2 | OK | 2.44814  | 10.901  | 2.15471      | -2.52491     | 0.0115728 | 0.183265  |
| gene144  | gene144  | cap5O     | gi 57650036 ref NC_002951.2 :167488-168751   | q1 | q2 | OK | 3.02553  | 10.8896 | 1.84769      | -2.65239     | 0.0079924 | 0.14471   |
| gene1440 | gene1440 | SACOL1467 | gi 57650036 ref NC_002951.2 :1477722-1477917 | q1 | q2 | OK | 22.3723  | 75.7799 | 1.7601       | -2.06486     | 0.0389359 | 0.38357   |
| gene1442 | gene1442 | SACOL1469 | gi 57650036 ref NC_002951.2 :1478930-1479062 | q1 | q2 | OK | 0        | 318.311 | 1.79769e+308 | 1.79769e+308 | 0.0141027 | 0.204943  |
| gene1446 | gene1446 | SACOL1476 | gi 57650036 ref NC_002951.2 :1513308-1514631 | q1 | q2 | OK | 2.31843  | 9.81651 | 2.08206      | -2.95748     | 0.0031016 | 0.0795967 |
| gene1447 | gene1447 | ilvA1     | gi 57650036 ref NC_002951.2 :1514661-1515702 | q1 | q2 | OK | 1.82087  | 6.81798 | 1.90472      | -2.59323     | 0.0095079 | 0.161634  |
| gene1448 | gene1448 | ald1      | gi 57650036 ref NC_002951.2 :1515796-1516915 | q1 | q2 | OK | 1.66639  | 5.39893 | 1.69595      | -2.30265     | 0.0212988 | 0.273297  |
| gene1452 | gene1452 | SACOL1482 | gi 57650036 ref NC_002951.2 :1523577-1523910 | q1 | q2 | OK | 21.1213  | 3.21226 | -2.71703     | 3.05097      | 0.002281  | 0.063737  |
| gene1478 | gene1478 | ndk       | gi 57650036 ref NC_002951.2 :1549035-1549485 | q1 | q2 | OK | 259.126  | 50.753  | -2.35209     | 3.20042      | 0.0013723 | 0.0435582 |
| gene1487 | gene1487 | ansA      | gi 57650036 ref NC_002951.2 :1557881-1558850 | q1 | q2 | OK | 16.1293  | 6.16641 | -1.38718     | 2.01811      | 0.0435801 | 0.40838   |
| gene1490 | gene1490 | SACOL1522 | gi 57650036 ref NC_002951.2 :1560352-1561813 | q1 | q2 | OK | 236.843  | 926.161 | 1.96733      | -2.06704     | 0.0387305 | 0.383437  |
| gene1494 | gene1494 | SACOL1526 | gi 57650036 ref NC_002951.2 :1564749-1565295 | q1 | q2 | OK | 112.336  | 36.6988 | -1.61402     | 2.2621       | 0.0236912 | 0.292955  |

|          |          |           |                                              |    |    |    |          |         |          |          |           |           |
|----------|----------|-----------|----------------------------------------------|----|----|----|----------|---------|----------|----------|-----------|-----------|
| gene1498 | gene1498 | SACOL1531 | gi 57650036 ref NC_002951.2 :1568015-1568933 | q1 | q2 | OK | 0.213264 | 1.84324 | 3.11153  | -2.39852 | 0.0164614 | 0.230359  |
| gene150  | gene150  | SACOL0156 | gi 57650036 ref NC_002951.2 :174334-174538   | q1 | q2 | OK | 50.5897  | 830.669 | 4.03736  | -5.43203 | 5.57E-08  | 1.02E-05  |
| gene1506 | gene1506 | SACOL1539 | gi 57650036 ref NC_002951.2 :1577030-1577537 | q1 | q2 | OK | 13.9523  | 39.5649 | 1.50371  | -2.18189 | 0.0291175 | 0.324689  |
| gene1526 | gene1526 | SACOL1560 | gi 57650036 ref NC_002951.2 :1595255-1596530 | q1 | q2 | OK | 93.7422  | 28.9196 | -1.69665 | 2.18457  | 0.0289206 | 0.323976  |
| gene1542 | gene1542 | SACOL1576 | gi 57650036 ref NC_002951.2 :1610243-1613127 | q1 | q2 | OK | 2.35037  | 11.5865 | 2.30148  | -1.98742 | 0.0468758 | 0.425113  |
| gene1574 | gene1574 | rpmG      | gi 57650036 ref NC_002951.2 :1638641-1638791 | q1 | q2 | OK | 2056.82  | 474.778 | -2.11509 | 3.01829  | 0.0025421 | 0.0691808 |
| gene160  | gene160  | SACOL0166 | gi 57650036 ref NC_002951.2 :191117-191612   | q1 | q2 | OK | 34.7391  | 121.648 | 1.80808  | -2.55115 | 0.0107369 | 0.174614  |
| gene1604 | gene1604 | grpE      | gi 57650036 ref NC_002951.2 :1668474-1669101 | q1 | q2 | OK | 527.674  | 112.186 | -2.23375 | 2.68172  | 0.0073244 | 0.137988  |
| gene1605 | gene1605 | hrcA      | gi 57650036 ref NC_002951.2 :1669132-1670110 | q1 | q2 | OK | 424.354  | 89.8657 | -2.23943 | 2.58678  | 0.0096876 | 0.163425  |
| gene1608 | gene1608 | rpsT      | gi 57650036 ref NC_002951.2 :1674065-1674317 | q1 | q2 | OK | 887.499  | 311.748 | -1.50937 | 2.03946  | 0.0414042 | 0.396038  |
| gene1609 | gene1609 | holA      | gi 57650036 ref NC_002951.2 :1674361-1675336 | q1 | q2 | OK | 16.3997  | 6.11861 | -1.42239 | 2.06866  | 0.0385782 | 0.382453  |
| gene1617 | gene1617 | SACOL1651 | gi 57650036 ref NC_002951.2 :1681096-1681387 | q1 | q2 | OK | 22.8366  | 5.47979 | -2.05915 | 2.38487  | 0.0170853 | 0.235517  |
| gene1618 | gene1618 | aroE      | gi 57650036 ref NC_002951.2 :1681390-1682197 | q1 | q2 | OK | 41.3671  | 11.4491 | -1.85325 | 2.66274  | 0.0077508 | 0.14273   |
| gene1619 | gene1619 | SACOL1653 | gi 57650036 ref NC_002951.2 :1682210-1683311 | q1 | q2 | OK | 32.8035  | 8.68865 | -1.91665 | 2.73369  | 0.0062629 | 0.123837  |
| gene1620 | gene1620 | SACOL1654 | gi 57650036 ref NC_002951.2 :1683311-1683839 | q1 | q2 | OK | 41.9835  | 14.1392 | -1.57012 | 2.27919  | 0.0226556 | 0.286641  |
| gene1634 | gene1634 | SACOL1668 | gi 57650036 ref NC_002951.2 :1696291-1697215 | q1 | q2 | OK | 37.6465  | 13.8619 | -1.44139 | 2.06453  | 0.0389678 | 0.38357   |
| gene1635 | gene1635 | SACOL1669 | gi 57650036 ref NC_002951.2 :1697217-1697856 | q1 | q2 | OK | 19.1776  | 5.0283  | -1.93128 | 2.71681  | 0.0065914 | 0.128232  |
| gene1638 | gene1638 | SACOL1672 | gi 57650036 ref NC_002951.2 :1698895-1699156 | q1 | q2 | OK | 296.894  | 833.282 | 1.48886  | -2.00372 | 0.0450998 | 0.41578   |
| gene1645 | gene1645 | SACOL1679 | gi 57650036 ref NC_002951.2 :1709623-1709770 | q1 | q2 | OK | 31.5869  | 2298.48 | 6.18521  | -4.89681 | 9.74E-07  | 0.0001163 |
| gene1646 | gene1646 | SACOL1680 | gi 57650036 ref NC_002951.2 :1709809-1709992 | q1 | q2 | OK | 7.56139  | 348.89  | 5.52798  | -4.37753 | 1.20E-05  | 0.0009241 |
| gene1649 | gene1649 | SACOL1683 | gi 57650036 ref NC_002951.2 :1712033-1712807 | q1 | q2 | OK | 37.3423  | 13.0693 | -1.51463 | 2.19253  | 0.0283409 | 0.319082  |
| gene1650 | gene1650 | aspS      | gi 57650036 ref NC_002951.2 :1713267-1715034 | q1 | q2 | OK | 32.4515  | 11.324  | -1.5189  | 2.08525  | 0.0370466 | 0.369812  |
| gene1651 | gene1651 | hisS      | gi 57650036 ref NC_002951.2 :1715049-1716312 | q1 | q2 | OK | 17.2888  | 6.0152  | -1.52315 | 2.21233  | 0.0269437 | 0.309278  |
| gene1659 | gene1659 | tgt       | gi 57650036 ref NC_002951.2 :1726574-1727714 | q1 | q2 | OK | 60.7682  | 13.9579 | -2.12223 | 2.90968  | 0.003618  | 0.0872791 |
| gene1660 | gene1660 | queA      | gi 57650036 ref NC_002951.2 :1727736-1728762 | q1 | q2 | OK | 32.9998  | 11.6144 | -1.50655 | 2.15825  | 0.0309087 | 0.336223  |
| gene1666 | gene1666 | SACOL1701 | gi 57650036 ref NC_002951.2 :1732826-1733147 | q1 | q2 | OK | 201.55   | 65.371  | -1.62442 | 2.33457  | 0.0195657 | 0.257448  |
| gene1667 | gene1667 | rplU      | gi 57650036 ref NC_002951.2 :1733152-1733461 | q1 | q2 | OK | 651.009  | 214.899 | -1.59902 | 2.1193   | 0.034065  | 0.353699  |
| gene1681 | gene1681 | hemC      | gi 57650036 ref NC_002951.2 :1747721-1748648 | q1 | q2 | OK | 28.8556  | 8.79856 | -1.71351 | 2.47829  | 0.0132012 | 0.19821   |
| gene1689 | gene1689 | rplT      | gi 57650036 ref NC_002951.2 :1756408-1756765 | q1 | q2 | OK | 428.628  | 64.9686 | -2.72191 | 3.69683  | 0.0002183 | 0.0105329 |
| gene1690 | gene1690 | rpmI      | gi 57650036 ref NC_002951.2 :1756811-1757012 | q1 | q2 | OK | 151.746  | 31.4399 | -2.27099 | 2.93743  | 0.0033094 | 0.082366  |
| gene1691 | gene1691 | infC      | gi 57650036 ref NC_002951.2 :1757040-1757568 | q1 | q2 | OK | 157.672  | 33.3282 | -2.24211 | 3.09775  | 0.00195   | 0.0569023 |
| gene1692 | gene1692 | SACOL1728 | gi 57650036 ref NC_002951.2 :1757796-1759290 | q1 | q2 | OK | 12.5463  | 52.8993 | 2.07599  | -2.8043  | 0.0050426 | 0.10765   |
| gene1693 | gene1693 | thrS      | gi 57650036 ref NC_002951.2 :1759715-1761653 | q1 | q2 | OK | 138.365  | 25.2379 | -2.45482 | 2.9464   | 0.003215  | 0.0816379 |

|          |          |           |                                              |    |    |    |          |         |          |          |           |           |
|----------|----------|-----------|----------------------------------------------|----|----|----|----------|---------|----------|----------|-----------|-----------|
| gene1717 | gene1717 | SACOL1754 | gi 57650036 ref NC_002951.2 :1795257-1795946 | q1 | q2 | OK | 58.2289  | 237.171 | 2.02612  | -2.59391 | 0.0094893 | 0.161634  |
| gene1720 | gene1720 | ald2      | gi 57650036 ref NC_002951.2 :1797491-1798610 | q1 | q2 | OK | 318.613  | 75.3451 | -2.08022 | 2.4201   | 0.0155161 | 0.219316  |
| gene1731 | gene1731 | rpsD      | gi 57650036 ref NC_002951.2 :1808535-1809138 | q1 | q2 | OK | 412.464  | 66.8362 | -2.62557 | 3.28932  | 0.0010043 | 0.0347762 |
| gene1733 | gene1733 | SACOL1771 | gi 57650036 ref NC_002951.2 :1810176-1810623 | q1 | q2 | OK | 12.3698  | 66.1029 | 2.41789  | -3.44409 | 0.000573  | 0.0226599 |
| gene1738 | gene1738 | SACOL1776 | gi 57650036 ref NC_002951.2 :1816468-1817086 | q1 | q2 | OK | 46.8717  | 14.2598 | -1.71676 | 2.48607  | 0.0129164 | 0.195099  |
| gene1740 | gene1740 | tyrS      | gi 57650036 ref NC_002951.2 :1818625-1819888 | q1 | q2 | OK | 23.1958  | 5.80778 | -1.9978  | 2.86861  | 0.0041228 | 0.0948257 |
| gene1749 | gene1749 | SACOL1788 | gi 57650036 ref NC_002951.2 :1833624-1835142 | q1 | q2 | OK | 66.0053  | 361.875 | 2.45484  | -2.75839 | 0.0058086 | 0.118414  |
| gene1750 | gene1750 | SACOL1789 | gi 57650036 ref NC_002951.2 :1835215-1835707 | q1 | q2 | OK | 383.945  | 2228.77 | 2.53728  | -2.79327 | 0.0052178 | 0.110421  |
| gene1763 | gene1763 | SACOL1802 | gi 57650036 ref NC_002951.2 :1851012-1851435 | q1 | q2 | OK | 26.6771  | 226.759 | 3.08749  | -4.26223 | 2.02E-05  | 0.0014283 |
| gene1768 | gene1768 | SACOL1807 | gi 57650036 ref NC_002951.2 :1862482-1862794 | q1 | q2 | OK | 29.6331  | 7.4393  | -1.99397 | 2.51941  | 0.0117551 | 0.184977  |
| gene1770 | gene1770 | SACOL1809 | gi 57650036 ref NC_002951.2 :1865520-1866702 | q1 | q2 | OK | 30.4107  | 8.30816 | -1.87198 | 2.66894  | 0.0076092 | 0.141199  |
| gene1773 | gene1773 | rot       | gi 57650036 ref NC_002951.2 :1868444-1868945 | q1 | q2 | OK | 213.951  | 681.236 | 1.67087  | -1.99043 | 0.0465433 | 0.424224  |
| gene1781 | gene1781 | ribD      | gi 57650036 ref NC_002951.2 :1874916-1875960 | q1 | q2 | OK | 3.81024  | 10.5825 | 1.47373  | -2.11854 | 0.0341297 | 0.353769  |
| gene1782 | gene1782 | SACOL1821 | gi 57650036 ref NC_002951.2 :1876440-1877943 | q1 | q2 | OK | 3.64386  | 21.4872 | 2.55994  | -3.63381 | 0.0002793 | 0.0127915 |
| gene1792 | gene1792 | tal       | gi 57650036 ref NC_002951.2 :1885159-1885873 | q1 | q2 | OK | 294.567  | 1026.97 | 1.80173  | -1.96284 | 0.0496651 | 0.437791  |
| gene1798 | gene1798 | metK      | gi 57650036 ref NC_002951.2 :1891566-1892760 | q1 | q2 | OK | 39.1338  | 14.3081 | -1.45158 | 2.03102  | 0.0422526 | 0.400763  |
| gene1809 | gene1809 | SACOL1848 | gi 57650036 ref NC_002951.2 :1902465-1903092 | q1 | q2 | OK | 11.1127  | 3.36042 | -1.7255  | 2.32561  | 0.0200394 | 0.260836  |
| gene1810 | gene1810 | SACOL1849 | gi 57650036 ref NC_002951.2 :1903132-1903477 | q1 | q2 | OK | 10.2899  | 2.23011 | -2.20604 | 2.27576  | 0.0228605 | 0.287725  |
| gene1827 | gene1827 | spIB      | gi 57650036 ref NC_002951.2 :1919937-1920660 | q1 | q2 | OK | 0.292722 | 1.89871 | 2.69742  | -2.05601 | 0.0397813 | 0.388526  |
| gene1830 | gene1830 | epiG      | gi 57650036 ref NC_002951.2 :1923504-1925650 | q1 | q2 | OK | 12.8852  | 161.648 | 3.64907  | -2.39312 | 0.0167057 | 0.231165  |
| gene1831 | gene1831 | epiE      | gi 57650036 ref NC_002951.2 :1923504-1925650 | q1 | q2 | OK | 8.7175   | 148.014 | 4.08568  | -2.58461 | 0.009749  | 0.164078  |
| gene1832 | gene1832 | epiF      | gi 57650036 ref NC_002951.2 :1923504-1925650 | q1 | q2 | OK | 15.526   | 280.457 | 4.17502  | -3.36513 | 0.0007651 | 0.0282292 |
| gene1833 | gene1833 | epiP      | gi 57650036 ref NC_002951.2 :1925672-1927046 | q1 | q2 | OK | 3.65275  | 68.1696 | 4.22207  | -5.62298 | 1.88E-08  | 4.00E-06  |
| gene185  | gene185  | SACOL0191 | gi 57650036 ref NC_002951.2 :224442-225021   | q1 | q2 | OK | 9.2879   | 32.3339 | 1.79962  | -2.59219 | 0.0095368 | 0.161634  |
| gene186  | gene186  | SACOL0192 | gi 57650036 ref NC_002951.2 :225403-226501   | q1 | q2 | OK | 0.511602 | 2.57848 | 2.33342  | -2.61874 | 0.0088254 | 0.154274  |
| gene1861 | gene1861 | SACOL1895 | gi 57650036 ref NC_002951.2 :1949050-1949416 | q1 | q2 | OK | 150.792  | 668.651 | 2.14869  | -2.76939 | 0.0056162 | 0.116126  |
| gene1867 | gene1867 | SACOL1902 | gi 57650036 ref NC_002951.2 :1957825-1958170 | q1 | q2 | OK | 786.146  | 242.339 | -1.69777 | 2.14971  | 0.0315782 | 0.341092  |
| gene1869 | gene1869 | SACOL1904 | gi 57650036 ref NC_002951.2 :1959541-1960006 | q1 | q2 | OK | 111.907  | 10.413  | -3.42584 | 4.74742  | 2.06E-06  | 0.0002071 |
| gene1874 | gene1874 | SACOL1909 | gi 57650036 ref NC_002951.2 :1965146-1965542 | q1 | q2 | OK | 41.107   | 8.40315 | -2.29038 | 3.15043  | 0.0016303 | 0.0497828 |
| gene1876 | gene1876 | SACOL1911 | gi 57650036 ref NC_002951.2 :1966318-1966471 | q1 | q2 | OK | 569.717  | 2787.74 | 2.29078  | -3.27937 | 0.0010404 | 0.035515  |
| gene1877 | gene1877 | SACOL1912 | gi 57650036 ref NC_002951.2 :1966495-1967095 | q1 | q2 | OK | 114.029  | 692.978 | 2.60341  | -3.09447 | 0.0019716 | 0.057304  |
| gene1916 | gene1916 | bcp       | gi 57650036 ref NC_002951.2 :1984316-1984772 | q1 | q2 | OK | 60.2925  | 178.031 | 1.56208  | -2.16342 | 0.0305089 | 0.333021  |
| gene1920 | gene1920 | SACOL1925 | gi 57650036 ref NC_002951.2 :1989746-1990289 | q1 | q2 | OK | 64.2426  | 24.1436 | -1.41189 | 2.04252  | 0.0411001 | 0.395011  |

|          |          |           |                                              |    |    |    |          |         |              |              |           |           |
|----------|----------|-----------|----------------------------------------------|----|----|----|----------|---------|--------------|--------------|-----------|-----------|
| gene1928 | gene1928 | SACOL1933 | gi 57650036 ref NC_002951.2 :1997915-1998431 | q1 | q2 | OK | 66.8126  | 524.156 | 2.9718       | -3.75512     | 0.0001733 | 0.0090861 |
| gene1934 | gene1934 | SACOL1939 | gi 57650036 ref NC_002951.2 :2002583-2003048 | q1 | q2 | OK | 27.6884  | 812.631 | 4.87525      | -6.12035     | 9.34E-10  | 3.48E-07  |
| gene1935 | gene1935 | SACOL1940 | gi 57650036 ref NC_002951.2 :2003054-2003330 | q1 | q2 | OK | 187.863  | 1030.1  | 2.45503      | -3.2514      | 0.0011484 | 0.0379491 |
| gene1936 | gene1936 | SACOL1941 | gi 57650036 ref NC_002951.2 :2003607-2004825 | q1 | q2 | OK | 10.5308  | 90.7543 | 3.10736      | -4.13335     | 3.58E-05  | 0.002331  |
| gene1943 | gene1943 | SACOL1948 | gi 57650036 ref NC_002951.2 :2010621-2011035 | q1 | q2 | OK | 0.712165 | 5.14369 | 2.85252      | -2.18398     | 0.028964  | 0.323976  |
| gene1945 | gene1945 | SACOL1950 | gi 57650036 ref NC_002951.2 :2011259-2011991 | q1 | q2 | OK | 61.2957  | 17.0063 | -1.84972     | 2.62473      | 0.0086718 | 0.152769  |
| gene1951 | gene1951 | SACOL1956 | gi 57650036 ref NC_002951.2 :2016425-2016956 | q1 | q2 | OK | 52.2361  | 179.808 | 1.78334      | -2.42761     | 0.0151986 | 0.215671  |
| gene1954 | gene1954 | gatB      | gi 57650036 ref NC_002951.2 :2020283-2021711 | q1 | q2 | OK | 134.075  | 36.9834 | -1.85809     | 2.27781      | 0.0227381 | 0.287183  |
| gene1955 | gene1955 | gatA      | gi 57650036 ref NC_002951.2 :2021723-2023181 | q1 | q2 | OK | 79.6227  | 20.8544 | -1.93283     | 2.50787      | 0.0121462 | 0.188226  |
| gene1956 | gene1956 | gatC      | gi 57650036 ref NC_002951.2 :2023182-2023485 | q1 | q2 | OK | 121.481  | 34.8385 | -1.80198     | 2.60123      | 0.0092891 | 0.161212  |
| gene198  | gene198  | pflB      | gi 57650036 ref NC_002951.2 :239820-242070   | q1 | q2 | OK | 9.41471  | 77.7859 | 3.04652      | -3.86775     | 0.0001098 | 0.0061623 |
| gene199  | gene199  | pflA      | gi 57650036 ref NC_002951.2 :242092-242848   | q1 | q2 | OK | 11.2897  | 43.654  | 1.9511       | -2.80459     | 0.0050381 | 0.10765   |
| gene1992 | gene1992 | SACOL1998 | gi 57650036 ref NC_002951.2 :2058954-2059131 | q1 | q2 | OK | 0        | 31.7031 | 1.79769e+308 | 1.79769e+308 | 0.0180909 | 0.243354  |
| gene1996 | gene1996 | h1b       | gi 57650036 ref NC_002951.2 :2063725-2064718 | q1 | q2 | OK | 9.26897  | 26.5605 | 1.5188       | -2.19986     | 0.0278169 | 0.315942  |
| gene1999 | gene1999 | SACOL2007 | gi 57650036 ref NC_002951.2 :2067483-2068708 | q1 | q2 | OK | 4.63178  | 163.166 | 5.13863      | -6.51905     | 7.08E-11  | 3.20E-08  |
| gene2000 | gene2000 | SACOL2009 | gi 57650036 ref NC_002951.2 :2069079-2069925 | q1 | q2 | OK | 0        | 3.75641 | 1.79769e+308 | 1.79769e+308 | 0.0026536 | 0.0711264 |
| gene2013 | gene2013 | h1d       | gi 57650036 ref NC_002951.2 :2082767-2082902 | q1 | q2 | OK | 335.279  | 1288.34 | 1.94208      | -2.40136     | 0.0163343 | 0.229092  |
| gene2014 | gene2014 | agrB      | gi 57650036 ref NC_002951.2 :2083137-2083844 | q1 | q2 | OK | 111.68   | 827.743 | 2.88981      | -3.37134     | 0.000748  | 0.0279049 |
| gene2016 | gene2016 | argC2     | gi 57650036 ref NC_002951.2 :2083868-2085161 | q1 | q2 | OK | 49.3222  | 292.196 | 2.56663      | -3.00567     | 0.00265   | 0.0711263 |
| gene2017 | gene2017 | agrA      | gi 57650036 ref NC_002951.2 :2085179-2085896 | q1 | q2 | OK | 105.417  | 413.396 | 1.97141      | -2.36128     | 0.0182117 | 0.244437  |
| gene2022 | gene2022 | SACOL2033 | gi 57650036 ref NC_002951.2 :2091441-2091666 | q1 | q2 | OK | 12.7327  | 0       | 1.79769e+308 | 1.79769e+308 | 0.0156463 | 0.220725  |
| gene2065 | gene2065 | SACOL2072 | gi 57650036 ref NC_002951.2 :2137442-2138963 | q1 | q2 | OK | 217.624  | 25.3663 | -3.10085     | 3.72438      | 0.0001958 | 0.0097724 |
| gene2071 | gene2071 | SACOL2078 | gi 57650036 ref NC_002951.2 :2144192-2144486 | q1 | q2 | OK | 7.42357  | 0       | 1.79769e+308 | 1.79769e+308 | 0.0114882 | 0.182325  |
| gene2081 | gene2081 | SACOL2089 | gi 57650036 ref NC_002951.2 :2152981-2153377 | q1 | q2 | OK | 2.32681  | 14.0053 | 2.58954      | -2.92542     | 0.0034399 | 0.0849254 |
| gene2103 | gene2103 | tdk       | gi 57650036 ref NC_002951.2 :2170931-2171531 | q1 | q2 | OK | 62.754   | 19.0424 | -1.72049     | 2.47387      | 0.0133657 | 0.199029  |
| gene2104 | gene2104 | rpmE2     | gi 57650036 ref NC_002951.2 :2171877-2172132 | q1 | q2 | OK | 700.567  | 75.7468 | -3.20927     | 4.42633      | 9.58E-06  | 0.0008119 |
| gene2106 | gene2106 | SACOL2114 | gi 57650036 ref NC_002951.2 :2173812-2175240 | q1 | q2 | OK | 42.0309  | 566.421 | 3.75235      | -4.27844     | 1.88E-05  | 0.001362  |
| gene2110 | gene2110 | SACOL2118 | gi 57650036 ref NC_002951.2 :2178704-2179226 | q1 | q2 | OK | 33.7359  | 9.25895 | -1.86536     | 2.66914      | 0.0076046 | 0.141199  |
| gene2111 | gene2111 | pyrG      | gi 57650036 ref NC_002951.2 :2179334-2180945 | q1 | q2 | OK | 40.706   | 9.21773 | -2.14276     | 2.9372       | 0.0033119 | 0.082366  |
| gene2114 | gene2114 | SACOL2122 | gi 57650036 ref NC_002951.2 :2183206-2184010 | q1 | q2 | OK | 21.0397  | 6.20962 | -1.76054     | 2.54079      | 0.0110602 | 0.177478  |

|          |          |           |                                              |    |    |    |          |         |          |          |           |           |
|----------|----------|-----------|----------------------------------------------|----|----|----|----------|---------|----------|----------|-----------|-----------|
| gene2124 | gene2124 | SACOL2132 | gi 57650036 ref NC_002951.2 :2192914-2193328 | q1 | q2 | OK | 5.69732  | 28.8047 | 2.33795  | -3.1154  | 0.001837  | 0.0540416 |
| gene2128 | gene2128 | SACOL2136 | gi 57650036 ref NC_002951.2 :2197464-2198130 | q1 | q2 | OK | 10.1834  | 170.274 | 4.06357  | -5.42923 | 5.66E-08  | 1.02E-05  |
| gene2129 | gene2129 | czrA      | gi 57650036 ref NC_002951.2 :2198281-2198602 | q1 | q2 | OK | 62.7582  | 13.0742 | -2.26308 | 3.11268  | 0.001854  | 0.0543209 |
| gene2139 | gene2139 | SACOL2147 | gi 57650036 ref NC_002951.2 :2210385-2212518 | q1 | q2 | OK | 2.69422  | 24.116  | 3.16206  | -4.37361 | 1.22E-05  | 0.000931  |
| gene2140 | gene2140 | SACOL2148 | gi 57650036 ref NC_002951.2 :2212529-2214070 | q1 | q2 | OK | 7.14632  | 234.593 | 5.03681  | -3.41744 | 0.0006321 | 0.0243336 |
| gene2141 | gene2141 | mtlD      | gi 57650036 ref NC_002951.2 :2212529-2214070 | q1 | q2 | OK | 5.74065  | 131.655 | 4.5194   | -4.84056 | 1.29E-06  | 0.0001378 |
| gene215  | gene215  | ldh1      | gi 57650036 ref NC_002951.2 :262249-263203   | q1 | q2 | OK | 6.90495  | 38.4666 | 2.47791  | -3.51875 | 0.0004336 | 0.0181379 |
| gene2159 | gene2159 | SACOL2158 | gi 57650036 ref NC_002951.2 :2237138-2237612 | q1 | q2 | OK | 116.626  | 36.6643 | -1.66945 | 2.37073  | 0.0177532 | 0.241958  |
| gene2164 | gene2164 | SACOL2163 | gi 57650036 ref NC_002951.2 :2241856-2242117 | q1 | q2 | OK | 2716.48  | 659.379 | -2.04256 | 2.46042  | 0.0138775 | 0.204544  |
| gene2165 | gene2165 | SACOL2164 | gi 57650036 ref NC_002951.2 :2242248-2243619 | q1 | q2 | OK | 74.4193  | 10.7318 | -2.79379 | 3.72621  | 0.0001944 | 0.0097688 |
| gene2168 | gene2168 | SACOL2167 | gi 57650036 ref NC_002951.2 :2245862-2246846 | q1 | q2 | OK | 25.3915  | 7.0329  | -1.85215 | 2.67699  | 0.0074288 | 0.13928   |
| gene2169 | gene2169 | SACOL2168 | gi 57650036 ref NC_002951.2 :2247237-2248308 | q1 | q2 | OK | 3.69218  | 14.5584 | 1.9793   | -2.83828 | 0.0045358 | 0.0991698 |
| gene2170 | gene2170 | SACOL2169 | gi 57650036 ref NC_002951.2 :2248314-2251252 | q1 | q2 | OK | 4.71888  | 22.3544 | 2.24405  | -2.89741 | 0.0037626 | 0.0904646 |
| gene2173 | gene2173 | SACOL2172 | gi 57650036 ref NC_002951.2 :2253785-2255410 | q1 | q2 | OK | 0.322449 | 1.46962 | 2.1883   | -2.44523 | 0.0144761 | 0.208278  |
| gene2174 | gene2174 | SACOL2173 | gi 57650036 ref NC_002951.2 :2255445-2255955 | q1 | q2 | OK | 508.79   | 13085   | 4.6847   | -5.22328 | 1.76E-07  | 2.77E-05  |
| gene2175 | gene2175 | SACOL2174 | gi 57650036 ref NC_002951.2 :2256017-2256257 | q1 | q2 | OK | 159.965  | 2213.51 | 3.79051  | -4.91741 | 8.77E-07  | 0.0001076 |
| gene2176 | gene2176 | SACOL2175 | gi 57650036 ref NC_002951.2 :2256269-2256818 | q1 | q2 | OK | 95.149   | 3337.43 | 5.1324   | -5.95411 | 2.61E-09  | 7.57E-07  |
| gene2177 | gene2177 | opuD2     | gi 57650036 ref NC_002951.2 :2256980-2258543 | q1 | q2 | OK | 17.867   | 634.337 | 5.14988  | -6.02188 | 1.72E-09  | 5.42E-07  |
| gene2191 | gene2191 | SACOL2190 | gi 57650036 ref NC_002951.2 :2271268-2271877 | q1 | q2 | OK | 0.748471 | 3.23871 | 2.1134   | -2.11171 | 0.0347117 | 0.357338  |
| gene2194 | gene2194 | SACOL2193 | gi 57650036 ref NC_002951.2 :2273401-2273818 | q1 | q2 | OK | 3.51272  | 12.1779 | 1.79361  | -2.19913 | 0.0278688 | 0.315942  |
| gene2195 | gene2195 | hysA      | gi 57650036 ref NC_002951.2 :2274225-2276649 | q1 | q2 | OK | 0.551    | 3.02251 | 2.45562  | -3.27543 | 0.001055  | 0.0358462 |
| gene2198 | gene2198 | SACOL2197 | gi 57650036 ref NC_002951.2 :2278882-2279308 | q1 | q2 | OK | 8.77649  | 463.694 | 5.72339  | -7.2392  | 4.51E-13  | 4.08E-10  |
| gene2206 | gene2206 | SACOL2205 | gi 57650036 ref NC_002951.2 :2286768-2288129 | q1 | q2 | OK | 1.58299  | 5.41214 | 1.77355  | -2.45615 | 0.0140434 | 0.204943  |
| gene2207 | gene2207 | rpsI      | gi 57650036 ref NC_002951.2 :2288673-2289072 | q1 | q2 | OK | 726.849  | 123.658 | -2.5553  | 3.23929  | 0.0011983 | 0.0391064 |
| gene2208 | gene2208 | rplM      | gi 57650036 ref NC_002951.2 :2289085-2289523 | q1 | q2 | OK | 225.198  | 35.2143 | -2.67696 | 3.6933   | 0.0002214 | 0.0106092 |
| gene2222 | gene2222 | rpmD      | gi 57650036 ref NC_002951.2 :2298744-2298924 | q1 | q2 | OK | 739.213  | 279.463 | -1.40333 | 2.04396  | 0.040957  | 0.394682  |
| gene2226 | gene2226 | rpsH      | gi 57650036 ref NC_002951.2 :2300412-2300811 | q1 | q2 | OK | 236.169  | 77.8385 | -1.60126 | 2.21281  | 0.0269111 | 0.309278  |
| gene2231 | gene2231 | rpsQ      | gi 57650036 ref NC_002951.2 :2302369-2302633 | q1 | q2 | OK | 275.992  | 106.772 | -1.3701  | 1.98377  | 0.0472815 | 0.426221  |
| gene2247 | gene2247 | SACOL2247 | gi 57650036 ref NC_002951.2 :2314240-2314372 | q1 | q2 | OK | 420.017  | 53.0518 | -2.98497 | 1.96923  | 0.0489268 | 0.434992  |
| gene2287 | gene2287 | sarY      | gi 57650036 ref NC_002951.2 :2347997-2348741 | q1 | q2 | OK | 1.97001  | 9.32932 | 2.24357  | -2.93442 | 0.0033417 | 0.0828218 |
| gene2288 | gene2288 | SACOL2290 | gi 57650036 ref NC_002951.2 :2348766-2350722 | q1 | q2 | OK | 2.70405  | 11.8619 | 2.13314  | -3.0678  | 0.0021564 | 0.0607226 |
| gene2289 | gene2289 | SACOL2291 | gi 57650036 ref NC_002951.2 :2351331-2352135 | q1 | q2 | OK | 423.329  | 74.3328 | -2.50971 | 2.99877  | 0.0027107 | 0.0715959 |
| gene2290 | gene2290 | nhaC      | gi 57650036 ref NC_002951.2 :2352567-2353968 | q1 | q2 | OK | 6.37618  | 19.7338 | 1.6299   | -2.35008 | 0.0187694 | 0.249236  |

|          |          |           |                                              |    |    |    |          |         |              |              |           |           |
|----------|----------|-----------|----------------------------------------------|----|----|----|----------|---------|--------------|--------------|-----------|-----------|
| gene2291 | gene2291 | SACOL2293 | gi 57650036 ref NC_002951.2 :2354062-2355145 | q1 | q2 | OK | 4.50918  | 35.214  | 2.96521      | -4.16434     | 3.12E-05  | 0.0020732 |
| gene2295 | gene2295 | SACOL2297 | gi 57650036 ref NC_002951.2 :2357958-2359083 | q1 | q2 | OK | 22.0193  | 8.5822  | -1.35935     | 1.97209      | 0.0485989 | 0.433141  |
| gene2313 | gene2313 | SACOL2315 | gi 57650036 ref NC_002951.2 :2375491-2376022 | q1 | q2 | OK | 16.1793  | 3.00235 | -2.42998     | 3.15044      | 0.0016303 | 0.0497828 |
| gene2319 | gene2319 | SACOL2321 | gi 57650036 ref NC_002951.2 :2382110-2382992 | q1 | q2 | OK | 50.2914  | 437.295 | 3.12022      | -3.73614     | 0.0001869 | 0.0095236 |
| gene2325 | gene2325 | hutG      | gi 57650036 ref NC_002951.2 :2389540-2390476 | q1 | q2 | OK | 27.2547  | 334.448 | 3.61721      | -4.46351     | 8.06E-06  | 0.000703  |
| gene2337 | gene2337 | gltS      | gi 57650036 ref NC_002951.2 :2399778-2400987 | q1 | q2 | OK | 41.2843  | 7.53932 | -2.45309     | 3.43133      | 0.0006006 | 0.0233697 |
| gene2345 | gene2345 | SACOL2348 | gi 57650036 ref NC_002951.2 :2408129-2408777 | q1 | q2 | OK | 5.80865  | 1.47813 | -1.97443     | 2.36715      | 0.0179259 | 0.242627  |
| gene2354 | gene2354 | SACOL2357 | gi 57650036 ref NC_002951.2 :2415466-2417187 | q1 | q2 | OK | 1.96788  | 6.69839 | 1.76718      | -2.04491     | 0.040864  | 0.394682  |
| gene2362 | gene2362 | SACOL2365 | gi 57650036 ref NC_002951.2 :2426086-2426716 | q1 | q2 | OK | 51.6165  | 475.898 | 3.20475      | -3.98933     | 6.63E-05  | 0.0040248 |
| gene237  | gene237  | lytR      | gi 57650036 ref NC_002951.2 :287180-287921   | q1 | q2 | OK | 16.6964  | 6.11813 | -1.44837     | 2.08468      | 0.0370988 | 0.369812  |
| gene2370 | gene2370 | SACOL2374 | gi 57650036 ref NC_002951.2 :2432564-2433188 | q1 | q2 | OK | 27.4366  | 8.85111 | -1.63217     | 2.35806      | 0.0183709 | 0.245748  |
| gene2375 | gene2375 | SACOL2379 | gi 57650036 ref NC_002951.2 :2439935-2440358 | q1 | q2 | OK | 158.011  | 1079.45 | 2.77221      | -3.35725     | 0.0007872 | 0.0287737 |
| gene2379 | gene2379 | SACOL2383 | gi 57650036 ref NC_002951.2 :2442841-2443207 | q1 | q2 | OK | 42.6942  | 12.4675 | -1.77587     | 2.48732      | 0.012871  | 0.194869  |
| gene2382 | gene2382 | SACOL2386 | gi 57650036 ref NC_002951.2 :2444801-2445971 | q1 | q2 | OK | 2.05245  | 13.5259 | 2.7203       | -3.78884     | 0.0001514 | 0.0081136 |
| gene239  | gene239  | lrgB      | gi 57650036 ref NC_002951.2 :288033-289171   | q1 | q2 | OK | 2.1347   | 6.81407 | 1.67448      | -2.04907     | 0.0404551 | 0.392458  |
| gene2391 | gene2391 | narG      | gi 57650036 ref NC_002951.2 :2450437-2456914 | q1 | q2 | OK | 0.351146 | 6.12474 | 4.12451      | -2.35663     | 0.0184415 | 0.246238  |
| gene2394 | gene2394 | nirB      | gi 57650036 ref NC_002951.2 :2458509-2460915 | q1 | q2 | OK | 1.3193   | 3.89639 | 1.56236      | -2.23496     | 0.0254201 | 0.303073  |
| gene2395 | gene2395 | nirR      | gi 57650036 ref NC_002951.2 :2460980-2461712 | q1 | q2 | OK | 0.863319 | 5.18484 | 2.58633      | -2.92179     | 0.0034802 | 0.0850894 |
| gene2413 | gene2413 | SACOL2418 | gi 57650036 ref NC_002951.2 :2476717-2478028 | q1 | q2 | OK | 17.0935  | 4.56441 | -1.90495     | 2.75229      | 0.005918  | 0.119299  |
| gene2425 | gene2425 | SACOL2430 | gi 57650036 ref NC_002951.2 :2487795-2489529 | q1 | q2 | OK | 0.299543 | 1.79623 | 2.58414      | -2.91931     | 0.003508  | 0.0851932 |
| gene2427 | gene2427 | SACOL2433 | gi 57650036 ref NC_002951.2 :2491944-2492052 | q1 | q2 | OK | 17905.4  | 0       | 1.79769e+308 | 1.79769e+308 | 0.0032688 | 0.0821387 |
| gene2437 | gene2437 | SACOL2443 | gi 57650036 ref NC_002951.2 :2502379-2504209 | q1 | q2 | OK | 40.1245  | 13.3879 | -1.58356     | 2.12924      | 0.0332347 | 0.349475  |
| gene2450 | gene2450 | pnbA      | gi 57650036 ref NC_002951.2 :2517261-2518614 | q1 | q2 | OK | 13.5487  | 97.1388 | 2.84189      | -3.71182     | 0.0002058 | 0.0101304 |
| gene2452 | gene2452 | SACOL2461 | gi 57650036 ref NC_002951.2 :2520258-2521690 | q1 | q2 | OK | 8.49102  | 50.2842 | 2.5661       | -3.01333     | 0.002584  | 0.0700378 |
| gene2458 | gene2458 | SACOL2467 | gi 57650036 ref NC_002951.2 :2524250-2524706 | q1 | q2 | OK | 18.5056  | 61.6428 | 1.73597      | -2.51544     | 0.0118883 | 0.186337  |
| gene247  | gene247  | SACOL0257 | gi 57650036 ref NC_002951.2 :296294-297293   | q1 | q2 | OK | 5.36632  | 29.2591 | 2.44688      | -3.49292     | 0.0004778 | 0.0195727 |
| gene2471 | gene2471 | SACOL2481 | gi 57650036 ref NC_002951.2 :2537619-2537985 | q1 | q2 | OK | 7.26709  | 71.524  | 3.29898      | -4.39938     | 1.09E-05  | 0.0008765 |
| gene2472 | gene2472 | fabG2     | gi 57650036 ref NC_002951.2 :2538247-2539066 | q1 | q2 | OK | 8.6573   | 124.921 | 3.85095      | -5.16703     | 2.38E-07  | 3.66E-05  |
| gene2474 | gene2474 | SACOL2484 | gi 57650036 ref NC_002951.2 :2540948-2541371 | q1 | q2 | OK | 22.5729  | 204.034 | 3.17614      | -4.39597     | 1.10E-05  | 0.0008765 |
| gene2476 | gene2476 | SACOL2486 | gi 57650036 ref NC_002951.2 :2542259-2542679 | q1 | q2 | OK | 28.42    | 79.1006 | 1.47678      | -2.14743     | 0.0317588 | 0.342022  |
| gene2477 | gene2477 | SACOL2487 | gi 57650036 ref NC_002951.2 :2542945-2543368 | q1 | q2 | OK | 1.36806  | 5.92835 | 2.1155       | -2.1138      | 0.0345321 | 0.355995  |
| gene2478 | gene2478 | SACOL2488 | gi 57650036 ref NC_002951.2 :2543618-2544314 | q1 | q2 | OK | 59.5683  | 205.787 | 1.78853      | -2.30624     | 0.0210971 | 0.272156  |



|          |          |           |                                              |    |    |    |         |         |          |          |           |           |
|----------|----------|-----------|----------------------------------------------|----|----|----|---------|---------|----------|----------|-----------|-----------|
| gene2480 | gene2480 | SACOL2491 | gi 57650036 ref NC_002951.2 :2545143-2545335 | q1 | q2 | OK | 48.0378 | 166.929 | 1.79699  | -2.37763 | 0.0174242 | 0.238061  |
| gene2491 | gene2491 | SACOL2502 | gi 57650036 ref NC_002951.2 :2556602-2556869 | q1 | q2 | OK | 30.3751 | 96.7736 | 1.67173  | -2.36751 | 0.0179085 | 0.242627  |
| gene2492 | gene2492 | SACOL2503 | gi 57650036 ref NC_002951.2 :2557012-2557321 | q1 | q2 | OK | 5.27132 | 29.4773 | 2.48337  | -2.97033 | 0.0029749 | 0.0769228 |
| gene2507 | gene2507 | SACOL2519 | gi 57650036 ref NC_002951.2 :2578701-2579190 | q1 | q2 | OK | 86.7909 | 2623.22 | 4.91765  | -5.75324 | 8.75E-09  | 2.04E-06  |
| gene2508 | gene2508 | SACOL2520 | gi 57650036 ref NC_002951.2 :2579256-2581149 | q1 | q2 | OK | 10.6758 | 30.2055 | 1.50047  | -2.05851 | 0.0395413 | 0.387684  |
| gene2511 | gene2511 | SACOL2523 | gi 57650036 ref NC_002951.2 :2584089-2585710 | q1 | q2 | OK | 3.17726 | 11.094  | 1.80392  | -2.54521 | 0.0109211 | 0.176027  |
| gene2518 | gene2518 | SACOL2530 | gi 57650036 ref NC_002951.2 :2592084-2593053 | q1 | q2 | OK | 1.99127 | 7.17024 | 1.84833  | -2.5148  | 0.01191   | 0.186337  |
| gene2520 | gene2520 | SACOL2532 | gi 57650036 ref NC_002951.2 :2593791-2594076 | q1 | q2 | OK | 62.521  | 252.557 | 2.0142   | -2.89366 | 0.0038078 | 0.0910432 |
| gene2528 | gene2528 | SACOL2541 | gi 57650036 ref NC_002951.2 :2600821-2601313 | q1 | q2 | OK | 10.9998 | 32.5202 | 1.56386  | -2.24789 | 0.0245835 | 0.297509  |
| gene2537 | gene2537 | SACOL2550 | gi 57650036 ref NC_002951.2 :2607794-2608139 | q1 | q2 | OK | 17.4928 | 55.7528 | 1.67228  | -2.37742 | 0.0174344 | 0.238061  |
| gene2540 | gene2540 | SACOL2553 | gi 57650036 ref NC_002951.2 :2611337-2613077 | q1 | q2 | OK | 22.975  | 169.691 | 2.88477  | -3.47673 | 0.0005076 | 0.020294  |
| gene2541 | gene2541 | SACOL2554 | gi 57650036 ref NC_002951.2 :2613123-2614201 | q1 | q2 | OK | 9.68503 | 117.105 | 3.5959   | -4.80436 | 1.55E-06  | 0.0001628 |
| gene2544 | gene2544 | SACOL2556 | gi 57650036 ref NC_002951.2 :2615458-2615677 | q1 | q2 | OK | 4982.77 | 1548.34 | -1.68623 | 1.99582  | 0.0459537 | 0.421504  |
| gene2545 | gene2545 | SACOL2557 | gi 57650036 ref NC_002951.2 :2616065-2616497 | q1 | q2 | OK | 159.222 | 52.7438 | -1.59396 | 2.24113  | 0.0250174 | 0.300717  |
| gene2548 | gene2548 | SACOL2561 | gi 57650036 ref NC_002951.2 :2619623-2620790 | q1 | q2 | OK | 102.149 | 30.2141 | -1.75738 | 2.27212  | 0.0230791 | 0.288469  |
| gene2550 | gene2550 | SACOL2563 | gi 57650036 ref NC_002951.2 :2621889-2623995 | q1 | q2 | OK | 10.6884 | 307.139 | 4.84477  | -5.72455 | 1.04E-08  | 2.35E-06  |
| gene2553 | gene2553 | SACOL2566 | gi 57650036 ref NC_002951.2 :2626695-2629185 | q1 | q2 | OK | 7.29104 | 1.3955  | -2.38534 | 3.40265  | 0.0006674 | 0.0252863 |
| gene2554 | gene2554 | SACOL2567 | gi 57650036 ref NC_002951.2 :2629392-2629878 | q1 | q2 | OK | 2.13895 | 7.33508 | 1.77791  | -2.08575 | 0.0370008 | 0.369812  |
| gene2563 | gene2563 | crtN      | gi 57650036 ref NC_002951.2 :2638833-2640342 | q1 | q2 | OK | 12.6366 | 36.0407 | 1.51202  | -2.08736 | 0.0368553 | 0.369812  |
| gene2564 | gene2564 | crtM      | gi 57650036 ref NC_002951.2 :2640353-2641217 | q1 | q2 | OK | 10.3769 | 39.5345 | 1.92974  | -2.76672 | 0.0056623 | 0.116747  |
| gene2565 | gene2565 | SACOL2578 | gi 57650036 ref NC_002951.2 :2641253-2644361 | q1 | q2 | OK | 12.7482 | 95.6652 | 2.9077   | -2.13154 | 0.0330449 | 0.34869   |
| gene2566 | gene2566 | SACOL2579 | gi 57650036 ref NC_002951.2 :2641253-2644361 | q1 | q2 | OK | 14.5584 | 99.8358 | 2.7777   | -2.48802 | 0.0128456 | 0.194869  |
| gene2568 | gene2568 | SACOL2581 | gi 57650036 ref NC_002951.2 :2644535-2645303 | q1 | q2 | OK | 526.693 | 159.656 | -1.72199 | 1.97353  | 0.0484348 | 0.43221   |
| gene2571 | gene2571 | isaA      | gi 57650036 ref NC_002951.2 :2648750-2649452 | q1 | q2 | OK | 2945.28 | 402.47  | -2.87145 | 3.08407  | 0.0020419 | 0.0581771 |
| gene2579 | gene2579 | SACOL2593 | gi 57650036 ref NC_002951.2 :2655056-2656311 | q1 | q2 | OK | 11.1143 | 2.77569 | -2.00149 | 1.98519  | 0.0471231 | 0.426221  |
| gene2583 | gene2583 | SACOL2597 | gi 57650036 ref NC_002951.2 :2657438-2658269 | q1 | q2 | OK | 18.1988 | 83.2097 | 2.19291  | -3.02632 | 0.0024755 | 0.0683793 |
| gene2590 | gene2590 | SACOL2605 | gi 57650036 ref NC_002951.2 :2663464-2664274 | q1 | q2 | OK | 4.01598 | 51.7193 | 3.68688  | -5.06143 | 4.16E-07  | 5.79E-05  |
| gene2603 | gene2603 | SACOL2619 | gi 57650036 ref NC_002951.2 :2676059-2677508 | q1 | q2 | OK | 82.5261 | 280.475 | 1.76495  | -1.99212 | 0.0463581 | 0.423595  |
| gene2604 | gene2604 | SACOL2620 | gi 57650036 ref NC_002951.2 :2677588-2678926 | q1 | q2 | OK | 15.2077 | 101.811 | 2.74302  | -3.56745 | 0.0003605 | 0.015577  |
| gene2605 | gene2605 | SACOL2621 | gi 57650036 ref NC_002951.2 :2679183-2679600 | q1 | q2 | OK | 4.91781 | 104.02  | 4.4027   | -5.70995 | 1.13E-08  | 2.48E-06  |
| gene2609 | gene2609 | SACOL2625 | gi 57650036 ref NC_002951.2 :2684778-2685222 | q1 | q2 | OK | 16.9022 | 195.298 | 3.53039  | -4.84913 | 1.24E-06  | 0.000136  |
| gene2611 | gene2611 | betA      | gi 57650036 ref NC_002951.2 :2685992-2687702 | q1 | q2 | OK | 115.838 | 2.91968 | -5.31016 | 6.70552  | 2.01E-11  | 9.68E-09  |
| gene2612 | gene2612 | betB      | gi 57650036 ref NC_002951.2 :2687962-2689453 | q1 | q2 | OK | 195.75  | 2.81761 | -6.11839 | 7.51194  | 5.82E-14  | 7.00E-11  |

|          |          |           |                                              |    |    |    |          |          |              |              |           |           |
|----------|----------|-----------|----------------------------------------------|----|----|----|----------|----------|--------------|--------------|-----------|-----------|
| gene2614 | gene2614 | SACOL2630 | gi 57650036 ref NC_002951.2 :2689705-2690269 | q1 | q2 | OK | 42.4641  | 10.0095  | -2.08487     | 2.99535      | 0.0027413 | 0.0721416 |
| gene2616 | gene2616 | cudT      | gi 57650036 ref NC_002951.2 :2691406-2693029 | q1 | q2 | OK | 154.24   | 3.40812  | -5.50006     | 6.85945      | 6.91E-12  | 3.85E-09  |
| gene2618 | gene2618 | nrdD      | gi 57650036 ref NC_002951.2 :2693547-2695931 | q1 | q2 | OK | 6.12305  | 35.1131  | 2.51969      | -2.69761     | 0.0069838 | 0.13442   |
| gene2624 | gene2624 | gpxA2     | gi 57650036 ref NC_002951.2 :2700983-2701481 | q1 | q2 | OK | 2.56647  | 12.2278  | 2.2523       | -2.79328     | 0.0052176 | 0.110421  |
| gene2640 | gene2640 | arcA      | gi 57650036 ref NC_002951.2 :2718451-2719687 | q1 | q2 | OK | 7.8348   | 2.55397  | -1.61715     | 2.30091      | 0.0213969 | 0.273585  |
| gene2654 | gene2654 | SACOL2671 | gi 57650036 ref NC_002951.2 :2740324-2746753 | q1 | q2 | OK | 14.4019  | 75.7456  | 2.3949       | -2.71111     | 0.0067059 | 0.130108  |
| gene2658 | gene2658 | secY      | gi 57650036 ref NC_002951.2 :2746763-2747975 | q1 | q2 | OK | 2.26996  | 0.653648 | -1.79608     | 2.14146      | 0.0322372 | 0.344846  |
| gene2661 | gene2661 | SACOL2678 | gi 57650036 ref NC_002951.2 :2755434-2756127 | q1 | q2 | OK | 0.310521 | 2.46211  | 2.98714      | -2.2955      | 0.0217045 | 0.276542  |
| gene2662 | gene2662 | SACOL2680 | gi 57650036 ref NC_002951.2 :2756807-2757110 | q1 | q2 | OK | 0        | 5.97231  | 1.79769e+308 | 1.79769e+308 | 0.0141027 | 0.204943  |
| gene2663 | gene2663 | SACOL2681 | gi 57650036 ref NC_002951.2 :2757263-2757623 | q1 | q2 | OK | 14.1018  | 634.983  | 5.49277      | -7.01291     | 2.33E-12  | 1.88E-09  |
| gene2664 | gene2664 | SACOL2682 | gi 57650036 ref NC_002951.2 :2757707-2758319 | q1 | q2 | OK | 2.60059  | 30.2754  | 3.54123      | -4.64805     | 3.35E-06  | 0.0003191 |
| gene2675 | gene2675 | SACOL2693 | gi 57650036 ref NC_002951.2 :2767031-2767097 | q1 | q2 | OK | 0        | 3.01E+06 | 1.79769e+308 | 1.79769e+308 | 0.0351354 | 0.35865   |
| gene2690 | gene2690 | SACOL2708 | gi 57650036 ref NC_002951.2 :2779275-2781818 | q1 | q2 | OK | 0.404933 | 4.73506  | 3.54763      | -3.36955     | 0.0007529 | 0.027943  |
| gene2691 | gene2691 | SACOL2709 | gi 57650036 ref NC_002951.2 :2781870-2782425 | q1 | q2 | OK | 1.72431  | 9.64162  | 2.48326      | -2.97019     | 0.0029762 | 0.0769228 |
| gene2692 | gene2692 | SACOL2710 | gi 57650036 ref NC_002951.2 :2782453-2783302 | q1 | q2 | OK | 3.06702  | 13.0866  | 2.09318      | -2.92345     | 0.0034618 | 0.0849254 |
| gene2695 | gene2695 | SACOL2713 | gi 57650036 ref NC_002951.2 :2785560-2786517 | q1 | q2 | OK | 43.2884  | 12.8199  | -1.7556      | 2.49012      | 0.0127698 | 0.19415   |
| gene2702 | gene2702 | SACOL2720 | gi 57650036 ref NC_002951.2 :2792353-2792929 | q1 | q2 | OK | 0.814078 | 15.2685  | 4.22924      | -4.41813     | 9.96E-06  | 0.0008282 |
| gene2703 | gene2703 | nixA      | gi 57650036 ref NC_002951.2 :2793057-2794110 | q1 | q2 | OK | 5.20627  | 13.8317  | 1.40966      | -2.04832     | 0.0405288 | 0.392646  |
| gene2705 | gene2705 | SACOL2723 | gi 57650036 ref NC_002951.2 :2795280-2795793 | q1 | q2 | OK | 3.42143  | 85.0216  | 4.63516      | -5.97551     | 2.29E-09  | 6.92E-07  |
| gene2710 | gene2710 | SACOL2728 | gi 57650036 ref NC_002951.2 :2799595-2800093 | q1 | q2 | OK | 6.67283  | 1.85269  | -1.84868     | 2.1266       | 0.0334533 | 0.350737  |
| gene2711 | gene2711 | SACOL2729 | gi 57650036 ref NC_002951.2 :2800171-2800522 | q1 | q2 | OK | 6.94183  | 0        | 1.79769e+308 | 1.79769e+308 | 0.0071656 | 0.136826  |
| gene2713 | gene2713 | SACOL2731 | gi 57650036 ref NC_002951.2 :2801134-2801335 | q1 | q2 | OK | 2168.5   | 754.558  | -1.523       | 2.03657      | 0.0416931 | 0.397017  |
| gene2716 | gene2716 | SACOL2734 | gi 57650036 ref NC_002951.2 :2802753-2803107 | q1 | q2 | OK | 0        | 4.22146  | 1.79769e+308 | 1.79769e+308 | 0.0141027 | 0.204943  |
| gene2722 | gene2722 | rpmH      | gi 57650036 ref NC_002951.2 :2809097-2809235 | q1 | q2 | OK | 3760.41  | 1201.95  | -1.64551     | 2.37935      | 0.0173434 | 0.238061  |
| gene290  | gene290  | SACOL0301 | gi 57650036 ref NC_002951.2 :334780-335626   | q1 | q2 | OK | 2.84423  | 18.9528  | 2.7363       | -3.79093     | 0.0001501 | 0.0081058 |
| gene292  | gene292  | SACOL0303 | gi 57650036 ref NC_002951.2 :337732-338623   | q1 | q2 | OK | 6.64777  | 21.0688  | 1.66417      | -2.41301     | 0.0158214 | 0.222762  |
| gene293  | gene293  | SACOL0305 | gi 57650036 ref NC_002951.2 :338871-339921   | q1 | q2 | OK | 29.1859  | 173.313  | 2.57004      | -3.25515     | 0.0011333 | 0.0376232 |
| gene294  | gene294  | SACOL0306 | gi 57650036 ref NC_002951.2 :339933-340611   | q1 | q2 | OK | 51.8817  | 260.877  | 2.33007      | -2.98458     | 0.0028396 | 0.0744582 |
| gene321  | gene321  | SACOL0333 | gi 57650036 ref NC_002951.2 :361694-361958   | q1 | q2 | OK | 0        | 7.02445  | 1.79769e+308 | 1.79769e+308 | 0.0180909 | 0.243354  |
| gene333  | gene333  | SACOL0345 | gi 57650036 ref NC_002951.2 :367359-367581   | q1 | q2 | OK | 13.3382  | 50.0644  | 1.90822      | -2.24938     | 0.0244881 | 0.296972  |

|         |         |           |                                            |    |    |    |          |         |              |              |              |              |           |          |
|---------|---------|-----------|--------------------------------------------|----|----|----|----------|---------|--------------|--------------|--------------|--------------|-----------|----------|
| gene342 | gene342 | SACOL0354 | gi 57650036 ref NC_002951.2 :369701-370981 | q1 | q2 | OK | 14.1404  | 51.0765 | 1.85284      | -2.19241     | 0.0283501    | 0.319082     |           |          |
| gene355 | gene355 | SACOL0367 | gi 57650036 ref NC_002951.2 :373931-375918 | q1 | q2 | OK | 1.9505   | 5.54048 | 1.50617      | -2.01338     | 0.0440748    | 0.409293     |           |          |
| gene363 | gene363 | SACOL0375 | gi 57650036 ref NC_002951.2 :380612-381254 | q1 | q2 | OK | 0.346319 | 5.99292 | 4.11308      | -3.22633     | 0.0012539    | 0.0405107    |           |          |
| gene367 | gene367 | SACOL0379 | gi 57650036 ref NC_002951.2 :382422-389447 | q1 | q2 | OK | 0.816901 | 2.97412 | 1.86423      | -2.6538      | 0.0079591    | 0.14471      |           |          |
| gene371 | gene371 | SACOL0383 | gi 57650036 ref NC_002951.2 :391344-395267 | q1 | q2 | OK | 0.358084 | 1.86797 | 2.38311      | -2.49709     | 0.0125216    | 0.192397     |           |          |
| gene379 | gene379 | SACOL0391 | gi 57650036 ref NC_002951.2 :398649-399477 | q1 | q2 | OK | 1.95047  | 6.85021 | 1.81233      | -2.39792     | 0.0164883    | 0.230359     |           |          |
| gene392 | gene392 | SACOL0404 | gi 57650036 ref NC_002951.2 :410847-411267 | q1 | q2 | OK | 38.8175  | 9.01146 | -2.10687     | 2.94164      | 0.0032648    | 0.0821387    |           |          |
| gene394 | gene394 | SACOL0406 | gi 57650036 ref NC_002951.2 :412832-413273 | q1 | q2 | OK | 12.6741  | 3.20351 | -1.98416     | 2.44926      | 0.0143148    | 0.207193     |           |          |
| gene395 | gene395 | glpT      | gi 57650036 ref NC_002951.2 :413355-414714 | q1 | q2 | OK | 53.3859  | 12.6501 | -2.07731     | 2.82939      | 0.0046637    | 0.101483     |           |          |
| gene407 | gene407 | SACOL0419 | gi 57650036 ref NC_002951.2 :424851-425241 | q1 | q2 | OK | 14.385   | 51.3738 | 1.83646      | -2.61896     | 0.0088199    | 0.154274     |           |          |
| gene423 | gene423 | SACOL0436 | gi 57650036 ref NC_002951.2 :442258-442450 | q1 | q2 | OK | 1621.28  | 539.309 | -1.58795     | 2.215        | 0.0267602    | 0.309278     |           |          |
| gene424 | gene424 | rpsF      | gi 57650036 ref NC_002951.2 :442693-442990 | q1 | q2 | OK | 434.557  | 87.6612 | -2.30953     | 3.21423      | 0.0013079    | 0.0416986    |           |          |
| gene425 | gene425 | ssb2      | gi 57650036 ref NC_002951.2 :443010-443514 | q1 | q2 | OK | 195.241  | 46.4933 | -2.07016     | 2.8285       | 0.0046767    | 0.101483     |           |          |
| gene426 | gene426 | rpsR      | gi 57650036 ref NC_002951.2 :443565-443808 | q1 | q2 | OK | 764.931  | 149.441 | -2.35575     | 3.27388      | 0.0010608    | 0.035874     |           |          |
| gene430 | gene430 | SACOL0443 | gi 57650036 ref NC_002951.2 :446937-447306 | q1 | q2 | OK | 0        | 1.93572 | 1.79769e+308 | 1.79769e+308 | 0.0351354    | 0.35865      |           |          |
| gene431 | gene431 | SACOL0444 | gi 57650036 ref NC_002951.2 :447486-448059 | q1 | q2 | OK | 13.9505  | 1250.85 | 6.48645      | -7.7585      | 8.66E-15     | 2.09E-11     |           |          |
| gene433 | gene433 | SACOL0446 | gi 57650036 ref NC_002951.2 :448759-449011 | q1 | q2 | OK | 428.14   | 15736.1 | 5.19985      | -6.05437     | 1.41E-09     | 4.64E-07     |           |          |
| gene443 | gene443 | SACOL0456 | gi 57650036 ref NC_002951.2 :458667-459330 | q1 | q2 | OK | 61.1655  | 185.204 | 1.59833      | -2.08957     | 0.0366564    | 0.368762     |           |          |
| gene444 | gene444 | SACOL0457 | gi 57650036 ref NC_002951.2 :459472-459880 | q1 | q2 | OK | 975.999  | 4023.41 | 2.04347      | -2.17999     | 0.0292585    | 0.32476      |           |          |
| gene452 | gene452 | SACOL0465 | gi 57650036 ref NC_002951.2 :467985-468138 | q1 | q2 | OK | 45.5773  | 0       | -            | -            | 1.79769e+308 | 1.79769e+308 | 0.0402447 | 0.390941 |
| gene455 | gene455 | SACOL0468 | gi 57650036 ref NC_002951.2 :470356-471037 | q1 | q2 | OK | 7.63828  | 41.0666 | 2.42665      | -3.46733     | 0.0005257    | 0.0209018    |           |          |
| gene459 | gene459 | SACOL0472 | gi 57650036 ref NC_002951.2 :473731-474658 | q1 | q2 | OK | 0        | 1.66869 | 1.79769e+308 | 1.79769e+308 | 0.0060633    | 0.121216     |           |          |
| gene467 | gene467 | SACOL0480 | gi 57650036 ref NC_002951.2 :482502-482811 | q1 | q2 | OK | 1978.06  | 11330.7 | 2.51808      | -2.68125     | 0.0073348    | 0.137988     |           |          |
| gene472 | gene472 | SACOL0485 | gi 57650036 ref NC_002951.2 :486627-487413 | q1 | q2 | OK | 7.83816  | 1.88254 | -2.05783     | 2.69451      | 0.0070492    | 0.135319     |           |          |
| gene486 | gene486 | SACOL0501 | gi 57650036 ref NC_002951.2 :501147-502485 | q1 | q2 | OK | 0.672905 | 2.13114 | 1.66315      | -2.03129     | 0.0422255    | 0.400763     |           |          |
| gene488 | gene488 | SACOL0503 | gi 57650036 ref NC_002951.2 :502701-504742 | q1 | q2 | OK | 75.191   | 11.8089 | -2.67068     | 2.91746      | 0.0035289    | 0.0854134    |           |          |
| gene498 | gene498 | gltC      | gi 57650036 ref NC_002951.2 :512592-513477 | q1 | q2 | OK | 1.11766  | 4.02531 | 1.84862      | -2.27043     | 0.0231815    | 0.28925      |           |          |
| gene499 | gene499 | gltB      | gi 57650036 ref NC_002951.2 :513657-518157 | q1 | q2 | OK | 2.42255  | 14.2718 | 2.55857      | -3.50025     | 0.0004648    | 0.019237     |           |          |
| gene500 | gene500 | gltD      | gi 57650036 ref NC_002951.2 :518174-519638 | q1 | q2 | OK | 3.63509  | 12.3834 | 1.76835      | -2.56042     | 0.0104547    | 0.17225      |           |          |
| gene503 | gene503 | SACOL0517 | gi 57650036 ref NC_002951.2 :521960-523601 | q1 | q2 | OK | 18.4945  | 6.96051 | -1.40983     | 2.02163      | 0.0432141    | 0.407214     |           |          |
| gene504 | gene504 | SACOL0518 | gi 57650036 ref NC_002951.2 :523625-524354 | q1 | q2 | OK | 26.9146  | 8.34286 | -1.68977     | 2.44799      | 0.0143654    | 0.20751      |           |          |

|         |         |           |                                            |    |    |    |         |         |          |          |           |           |
|---------|---------|-----------|--------------------------------------------|----|----|----|---------|---------|----------|----------|-----------|-----------|
| gene517 | gene517 | SACOL0528 | gi 57650036 ref NC_002951.2 :539330-539678 | q1 | q2 | OK | 109.083 | 35.0239 | -1.63901 | 2.37865  | 0.017376  | 0.238061  |
| gene529 | gene529 | SACOL0540 | gi 57650036 ref NC_002951.2 :548803-549184 | q1 | q2 | OK | 84.5491 | 998.901 | 3.56248  | -4.50242 | 6.72E-06  | 0.0006002 |
| gene530 | gene530 | spoVG     | gi 57650036 ref NC_002951.2 :549255-549558 | q1 | q2 | OK | 357.541 | 3141.43 | 3.13524  | -3.69824 | 0.0002171 | 0.0105329 |
| gene534 | gene534 | rplY      | gi 57650036 ref NC_002951.2 :552515-553169 | q1 | q2 | OK | 863.838 | 190.828 | -2.17849 | 2.4675   | 0.0136062 | 0.201778  |
| gene541 | gene541 | SACOL0552 | gi 57650036 ref NC_002951.2 :561041-561443 | q1 | q2 | OK | 332.206 | 118.07  | -1.49243 | 1.99592  | 0.0459426 | 0.421504  |
| gene562 | gene562 | SACOL0564 | gi 57650036 ref NC_002951.2 :584964-585852 | q1 | q2 | OK | 237.469 | 56.5892 | -2.06914 | 2.55485  | 0.0106234 | 0.173548  |
| gene563 | gene563 | SACOL0565 | gi 57650036 ref NC_002951.2 :585855-586416 | q1 | q2 | OK | 308.193 | 73.0966 | -2.07596 | 2.67345  | 0.0075075 | 0.140392  |
| gene580 | gene580 | rplK      | gi 57650036 ref NC_002951.2 :603475-603907 | q1 | q2 | OK | 519.115 | 157.756 | -1.71836 | 2.16928  | 0.0300613 | 0.330484  |
| gene581 | gene581 | rplA      | gi 57650036 ref NC_002951.2 :604114-604807 | q1 | q2 | OK | 761.397 | 154.665 | -2.2995  | 2.62704  | 0.0086132 | 0.152769  |
| gene582 | gene582 | rplJ      | gi 57650036 ref NC_002951.2 :605078-605579 | q1 | q2 | OK | 244.951 | 34.8505 | -2.81324 | 3.80183  | 0.0001436 | 0.0078747 |
| gene583 | gene583 | rplL      | gi 57650036 ref NC_002951.2 :605621-605990 | q1 | q2 | OK | 913.795 | 90.9789 | -3.32827 | 4.2476   | 2.16E-05  | 0.0014979 |
| gene584 | gene584 | SACOL0587 | gi 57650036 ref NC_002951.2 :606164-606773 | q1 | q2 | OK | 56.5095 | 19.9721 | -1.50051 | 2.16634  | 0.0302852 | 0.331579  |
| gene587 | gene587 | SACOL0590 | gi 57650036 ref NC_002951.2 :614435-614690 | q1 | q2 | OK | 312.561 | 26.2795 | -3.57213 | 4.89233  | 9.97E-07  | 0.0001163 |
| gene588 | gene588 | rpsL      | gi 57650036 ref NC_002951.2 :614787-615201 | q1 | q2 | OK | 957.15  | 280.331 | -1.77161 | 2.11697  | 0.0342624 | 0.354225  |
| gene589 | gene589 | rpsG      | gi 57650036 ref NC_002951.2 :615266-615737 | q1 | q2 | OK | 1186.99 | 261.515 | -2.18234 | 2.52271  | 0.0116455 | 0.184014  |
| gene590 | gene590 | fusA      | gi 57650036 ref NC_002951.2 :615859-617941 | q1 | q2 | OK | 715.813 | 164.957 | -2.11749 | 2.22567  | 0.0260365 | 0.306341  |
| gene594 | gene594 | SACOL0597 | gi 57650036 ref NC_002951.2 :622422-623301 | q1 | q2 | OK | 195.965 | 1032.61 | 2.39763  | -2.61403 | 0.0089481 | 0.156042  |
| gene606 | gene606 | sdrD      | gi 57650036 ref NC_002951.2 :635788-639934 | q1 | q2 | OK | 82.5732 | 17.7861 | -2.21492 | 2.55982  | 0.0104726 | 0.17225   |
| gene610 | gene610 | SACOL0613 | gi 57650036 ref NC_002951.2 :647314-648193 | q1 | q2 | OK | 195.514 | 62.3758 | -1.64821 | 2.05428  | 0.0399489 | 0.389112  |
| gene611 | gene611 | SACOL0614 | gi 57650036 ref NC_002951.2 :648205-648871 | q1 | q2 | OK | 74.8975 | 25.5767 | -1.55009 | 2.18752  | 0.0287044 | 0.322068  |
| gene612 | gene612 | SACOL0615 | gi 57650036 ref NC_002951.2 :648884-649247 | q1 | q2 | OK | 243.013 | 70.7522 | -1.78019 | 2.49237  | 0.0126893 | 0.19349   |
| gene614 | gene614 | SACOL0617 | gi 57650036 ref NC_002951.2 :650357-650990 | q1 | q2 | OK | 47.017  | 197.552 | 2.07097  | -2.7414  | 0.0061177 | 0.121632  |
| gene615 | gene615 | SACOL0618 | gi 57650036 ref NC_002951.2 :650991-651540 | q1 | q2 | OK | 90.3257 | 261.008 | 1.53089  | -1.98367 | 0.0472925 | 0.426221  |
| gene624 | gene624 | ung       | gi 57650036 ref NC_002951.2 :659763-660420 | q1 | q2 | OK | 64.6476 | 19.561  | -1.72462 | 2.46052  | 0.0138735 | 0.204544  |
| gene625 | gene625 | SACOL0628 | gi 57650036 ref NC_002951.2 :660420-660801 | q1 | q2 | OK | 61.1097 | 18.1398 | -1.75224 | 2.51934  | 0.0117576 | 0.184977  |
| gene626 | gene626 | SACOL0629 | gi 57650036 ref NC_002951.2 :660933-661302 | q1 | q2 | OK | 72.3532 | 15.4858 | -2.22411 | 3.15808  | 0.0015881 | 0.0489071 |
| gene627 | gene627 | SACOL0630 | gi 57650036 ref NC_002951.2 :661422-662907 | q1 | q2 | OK | 20.5007 | 409.605 | 4.32049  | -5.08295 | 3.72E-07  | 5.27E-05  |
| gene632 | gene632 | SACOL0635 | gi 57650036 ref NC_002951.2 :666735-667572 | q1 | q2 | OK | 138.691 | 47.0999 | -1.55808 | 2.02748  | 0.042613  | 0.403652  |
| gene634 | gene634 | mvaD      | gi 57650036 ref NC_002951.2 :669083-670067 | q1 | q2 | OK | 11.5238 | 32.914  | 1.51408  | -2.17538 | 0.0296013 | 0.327061  |
| gene641 | gene641 | SACOL0644 | gi 57650036 ref NC_002951.2 :675513-676140 | q1 | q2 | OK | 1.07542 | 4.65289 | 2.11322  | -2.3554  | 0.018503  | 0.246604  |
| gene651 | gene651 | SACOL0654 | gi 57650036 ref NC_002951.2 :683333-683960 | q1 | q2 | OK | 5.01864 | 1.29247 | -1.95717 | 2.25956  | 0.0238487 | 0.292955  |
| gene657 | gene657 | adhP      | gi 57650036 ref NC_002951.2 :688942-689953 | q1 | q2 | OK | 5.09813 | 19.3078 | 1.92114  | -2.7726  | 0.0055611 | 0.115648  |
| gene668 | gene668 | SACOL0671 | gi 57650036 ref NC_002951.2 :698936-699725 | q1 | q2 | OK | 79.5422 | 664.518 | 3.06252  | -3.56663 | 0.0003616 | 0.015577  |

|         |         |           |                                            |    |    |    |         |         |              |              |           |           |
|---------|---------|-----------|--------------------------------------------|----|----|----|---------|---------|--------------|--------------|-----------|-----------|
| gene669 | gene669 | sarA      | gi 57650036 ref NC_002951.2 :699975-700350 | q1 | q2 | OK | 546.26  | 5032.8  | 3.2037       | -3.54306     | 0.0003955 | 0.0167391 |
| gene674 | gene674 | SACOL0678 | gi 57650036 ref NC_002951.2 :703024-703585 | q1 | q2 | OK | 3.81532 | 66.0622 | 4.11395      | -5.47217     | 4.45E-08  | 8.47E-06  |
| gene675 | gene675 | SACOL0679 | gi 57650036 ref NC_002951.2 :703603-708245 | q1 | q2 | OK | 5.97971 | 59.8261 | 3.32263      | -2.82611     | 0.0047117 | 0.101483  |
| gene7   | gene7   | hutH      | gi 57650036 ref NC_002951.2 :10919-12434   | q1 | q2 | OK | 37.6203 | 9.38816 | -2.0026      | 2.77057      | 0.0055958 | 0.116038  |
| gene706 | gene706 | SACOL0711 | gi 57650036 ref NC_002951.2 :735702-736770 | q1 | q2 | OK | 346.147 | 75.0762 | -2.20496     | 2.56903      | 0.0101984 | 0.17006   |
| gene707 | gene707 | SACOL0712 | gi 57650036 ref NC_002951.2 :736920-737964 | q1 | q2 | OK | 31.5706 | 8.23086 | -1.93947     | 2.77861      | 0.0054592 | 0.114185  |
| gene708 | gene708 | SACOL0713 | gi 57650036 ref NC_002951.2 :738292-738721 | q1 | q2 | OK | 115.957 | 40.4293 | -1.52012     | 2.18038      | 0.0292292 | 0.32476   |
| gene728 | gene728 | SACOL0736 | gi 57650036 ref NC_002951.2 :759402-759846 | q1 | q2 | OK | 0       | 1.80831 | 1.79769e+308 | 1.79769e+308 | 0.0243447 | 0.296308  |
| gene730 | gene730 | SACOL0738 | gi 57650036 ref NC_002951.2 :760445-760745 | q1 | q2 | OK | 55.1378 | 222.143 | 2.01037      | -2.88876     | 0.0038677 | 0.0917722 |
| gene732 | gene732 | SACOL0740 | gi 57650036 ref NC_002951.2 :761462-762029 | q1 | q2 | OK | 10.8421 | 38.8079 | 1.8397       | -2.65649     | 0.0078959 | 0.14471   |
| gene733 | gene733 | SACOL0741 | gi 57650036 ref NC_002951.2 :762030-762489 | q1 | q2 | OK | 8.2614  | 23.8622 | 1.53027      | -2.14323     | 0.0320945 | 0.3441    |
| gene734 | gene734 | SACOL0742 | gi 57650036 ref NC_002951.2 :762491-763175 | q1 | q2 | OK | 18.6611 | 170.086 | 3.18816      | -4.27873     | 1.88E-05  | 0.001362  |
| gene744 | gene744 | SACOL0752 | gi 57650036 ref NC_002951.2 :774528-775146 | q1 | q2 | OK | 34.7876 | 100.347 | 1.52835      | -2.12879     | 0.0332718 | 0.349475  |
| gene754 | gene754 | SACOL0763 | gi 57650036 ref NC_002951.2 :785704-786544 | q1 | q2 | OK | 26.7949 | 99.4452 | 1.89194      | -2.56502     | 0.0103169 | 0.171267  |
| gene755 | gene755 | SACOL0764 | gi 57650036 ref NC_002951.2 :786675-787659 | q1 | q2 | OK | 49.6111 | 172.447 | 1.79742      | -2.24627     | 0.0246866 | 0.298259  |
| gene762 | gene762 | SACOL0771 | gi 57650036 ref NC_002951.2 :792381-792801 | q1 | q2 | OK | 32.579  | 10.5134 | -1.63172     | 2.30111      | 0.0213854 | 0.273585  |
| gene763 | gene763 | SACOL0772 | gi 57650036 ref NC_002951.2 :792802-793471 | q1 | q2 | OK | 32.9662 | 7.0591  | -2.22343     | 3.18165      | 0.0014644 | 0.0454837 |
| gene773 | gene773 | hisC      | gi 57650036 ref NC_002951.2 :807522-808581 | q1 | q2 | OK | 9.27021 | 47.8801 | 2.36875      | -3.31679     | 0.0009106 | 0.0323038 |
| gene775 | gene775 | SACOL0786 | gi 57650036 ref NC_002951.2 :809586-809748 | q1 | q2 | OK | 75.521  | 560.512 | 2.89179      | -3.62253     | 0.0002917 | 0.0131134 |
| gene776 | gene776 | SACOL0787 | gi 57650036 ref NC_002951.2 :810153-811071 | q1 | q2 | OK | 30.9233 | 320.723 | 3.37456      | -4.1698      | 3.05E-05  | 0.0020429 |
| gene778 | gene778 | SACOL0789 | gi 57650036 ref NC_002951.2 :813186-813687 | q1 | q2 | OK | 39.1312 | 12.106  | -1.6926      | 2.44214      | 0.0146004 | 0.20965   |
| gene779 | gene779 | SACOL0790 | gi 57650036 ref NC_002951.2 :813706-814573 | q1 | q2 | OK | 30.7612 | 10.5832 | -1.53933     | 2.23076      | 0.0256971 | 0.304771  |
| gene783 | gene783 | nrdF      | gi 57650036 ref NC_002951.2 :817957-818929 | q1 | q2 | OK | 1092.53 | 284.551 | -1.94092     | 2.06353      | 0.0390619 | 0.38357   |
| gene793 | gene793 | SACOL0804 | gi 57650036 ref NC_002951.2 :826824-827145 | q1 | q2 | OK | 76.034  | 232.721 | 1.61388      | -2.30284     | 0.0212876 | 0.273297  |
| gene82  | gene82  | SACOL0085 | gi 57650036 ref NC_002951.2 :95138-96317   | q1 | q2 | OK | 3.59789 | 9.79766 | 1.44529      | -2.08578     | 0.0369986 | 0.369812  |
| gene820 | gene820 | SACOL0831 | gi 57650036 ref NC_002951.2 :856420-858324 | q1 | q2 | OK | 48.6712 | 256.844 | 2.39976      | -2.32924     | 0.0198463 | 0.260196  |
| gene821 | gene821 | SACOL0832 | gi 57650036 ref NC_002951.2 :858433-859378 | q1 | q2 | OK | 55.0844 | 225.301 | 2.03214      | -2.49923     | 0.0124462 | 0.191645  |
| gene824 | gene824 | SACOL0834 | gi 57650036 ref NC_002951.2 :860780-861683 | q1 | q2 | OK | 19.3853 | 112.016 | 2.53067      | -3.3962      | 0.0006833 | 0.0257547 |
| gene825 | gene825 | SACOL0835 | gi 57650036 ref NC_002951.2 :862386-863016 | q1 | q2 | OK | 26.6982 | 221.264 | 3.05096      | -4.04803     | 5.17E-05  | 0.0033079 |
| gene827 | gene827 | gapR      | gi 57650036 ref NC_002951.2 :863775-864789 | q1 | q2 | OK | 70.9228 | 359.669 | 2.34235      | -2.74848     | 0.0059873 | 0.120361  |
| gene828 | gene828 | gapA1     | gi 57650036 ref NC_002951.2 :864841-865852 | q1 | q2 | OK | 246.598 | 1562.03 | 2.66318      | -2.85104     | 0.0043577 | 0.0979401 |
| gene829 | gene829 | pgk       | gi 57650036 ref NC_002951.2 :865990-867181 | q1 | q2 | OK | 57.9512 | 317.513 | 2.45391      | -2.86826     | 0.0041274 | 0.0948257 |

|         |         |           |                                              |    |    |    |         |         |              |              |           |           |
|---------|---------|-----------|----------------------------------------------|----|----|----|---------|---------|--------------|--------------|-----------|-----------|
| gene83  | gene83  | SACOL0086 | gi 57650036 ref NC_002951.2 :96318-97707     | q1 | q2 | OK | 2.83383 | 8.34409 | 1.558        | -2.24387     | 0.0248406 | 0.299551  |
| gene830 | gene830 | tpiA      | gi 57650036 ref NC_002951.2 :867302-868064   | q1 | q2 | OK | 87.175  | 403.604 | 2.21096      | -2.65099     | 0.0080256 | 0.144841  |
| gene831 | gene831 | pgm       | gi 57650036 ref NC_002951.2 :868066-869584   | q1 | q2 | OK | 69.0267 | 292.043 | 2.08095      | -2.35327     | 0.018609  | 0.247561  |
| gene834 | gene834 | secG      | gi 57650036 ref NC_002951.2 :871882-872116   | q1 | q2 | OK | 1372.25 | 436.036 | -1.65403     | 2.19619      | 0.0280784 | 0.31701   |
| gene844 | gene844 | SACOL0854 | gi 57650036 ref NC_002951.2 :879189-879711   | q1 | q2 | OK | 0       | 5.82971 | 1.79769e+308 | 1.79769e+308 | 0.0035064 | 0.0851932 |
| gene845 | gene845 | SACOL0855 | gi 57650036 ref NC_002951.2 :879849-880380   | q1 | q2 | OK | 1.3868  | 8.00628 | 2.52937      | -2.85334     | 0.0043263 | 0.0975363 |
| gene846 | gene846 | clfA      | gi 57650036 ref NC_002951.2 :880642-883444   | q1 | q2 | OK | 94.6643 | 1037.04 | 3.4535       | -3.74127     | 0.0001831 | 0.0093974 |
| gene853 | gene853 | SACOL0863 | gi 57650036 ref NC_002951.2 :889728-890013   | q1 | q2 | OK | 9.61861 | 31.1372 | 1.69474      | -2.14027     | 0.0323333 | 0.344846  |
| gene854 | gene854 | SACOL0864 | gi 57650036 ref NC_002951.2 :890100-890670   | q1 | q2 | OK | 4.96355 | 0.89518 | -2.47112     | 2.57207      | 0.0101091 | 0.16896   |
| gene857 | gene857 | SACOL0868 | gi 57650036 ref NC_002951.2 :891875-892112   | q1 | q2 | OK | 34.887  | 528.328 | 3.92067      | -5.3216      | 1.03E-07  | 1.71E-05  |
| gene86  | gene86  | SACOL0089 | gi 57650036 ref NC_002951.2 :100186-101962   | q1 | q2 | OK | 2.52687 | 22.4486 | 3.1512       | -4.39429     | 1.11E-05  | 0.0008765 |
| gene860 | gene860 | SACOL0871 | gi 57650036 ref NC_002951.2 :893762-894257   | q1 | q2 | OK | 17.1103 | 96.1957 | 2.49111      | -3.53938     | 0.0004011 | 0.0168752 |
| gene861 | gene861 | SACOL0872 | gi 57650036 ref NC_002951.2 :894655-895078   | q1 | q2 | OK | 12.9965 | 189.707 | 3.86757      | -5.27392     | 1.34E-07  | 2.15E-05  |
| gene867 | gene867 | SACOL0879 | gi 57650036 ref NC_002951.2 :898250-899129   | q1 | q2 | OK | 67.8774 | 18.3554 | -1.88673     | 2.6199       | 0.0087956 | 0.154274  |
| gene874 | gene874 | sek       | gi 57650036 ref NC_002951.2 :904799-905528   | q1 | q2 | OK | 25.4675 | 6.46572 | -1.97778     | 2.84111      | 0.0044957 | 0.0988909 |
| gene889 | gene889 | SACOL0901 | gi 57650036 ref NC_002951.2 :913514-913856   | q1 | q2 | OK | 54.527  | 18.9386 | -1.52564     | 2.17553      | 0.0295903 | 0.327061  |
| gene89  | gene89  | SACOL0092 | gi 57650036 ref NC_002951.2 :104707-105181   | q1 | q2 | OK | 3.90615 | 53.1833 | 3.76716      | -4.93468     | 8.03E-07  | 0.0001002 |
| gene900 | gene900 | SACOL0912 | gi 57650036 ref NC_002951.2 :919636-919831   | q1 | q2 | OK | 2511.29 | 58362.5 | 4.53854      | -5.15054     | 2.60E-07  | 3.92E-05  |
| gene908 | gene908 | SACOL0920 | gi 57650036 ref NC_002951.2 :927096-927411   | q1 | q2 | OK | 3.78043 | 0       | -            | -            | 0.0230444 | 0.288469  |
| gene909 | gene909 | SACOL0921 | gi 57650036 ref NC_002951.2 :927775-928816   | q1 | q2 | OK | 13.2924 | 62.1485 | 2.22512      | -3.07224     | 0.0021246 | 0.060061  |
| gene91  | gene91  | spa       | gi 57650036 ref NC_002951.2 :107363-108890   | q1 | q2 | OK | 123.267 | 9.22015 | -3.74085     | 4.77516      | 1.80E-06  | 0.0001856 |
| gene910 | gene910 | SACOL0922 | gi 57650036 ref NC_002951.2 :928829-929897   | q1 | q2 | OK | 11.1148 | 34.1717 | 1.62032      | -2.3111      | 0.0208271 | 0.269634  |
| gene921 | gene921 | SACOL0934 | gi 57650036 ref NC_002951.2 :937717-937870   | q1 | q2 | OK | 615.294 | 204.749 | -1.58742     | 2.13181      | 0.0330223 | 0.34869   |
| gene93  | gene93  | sirC      | gi 57650036 ref NC_002951.2 :110431-112422   | q1 | q2 | OK | 10.7326 | 107.927 | 3.32999      | -4.39725     | 1.10E-05  | 0.0008765 |
| gene944 | gene944 | SACOL0957 | gi 57650036 ref NC_002951.2 :958145-958739   | q1 | q2 | OK | 178.306 | 63.3224 | -1.49357     | 1.98912      | 0.0466883 | 0.42474   |
| gene950 | gene950 | argH      | gi 57650036 ref NC_002951.2 :965545-968120   | q1 | q2 | OK | 110.324 | 24.8497 | -2.15044     | 2.11954      | 0.0340448 | 0.353699  |
| gene96  | gene96  | SACOL0100 | gi 57650036 ref NC_002951.2 :113693-114641   | q1 | q2 | OK | 0       | 1.32692 | 1.79769e+308 | 1.79769e+308 | 0.0079984 | 0.14471   |
| gene965 | gene965 | clpB      | gi 57650036 ref NC_002951.2 :986246-988856   | q1 | q2 | OK | 555.008 | 112.206 | -2.30636     | 2.43925      | 0.0147176 | 0.210573  |
| gene973 | gene973 | fabH      | gi 57650036 ref NC_002951.2 :994755-995697   | q1 | q2 | OK | 68.5146 | 13.5252 | -2.34076     | 3.23897      | 0.0011996 | 0.0391064 |
| gene989 | gene989 | SACOL1003 | gi 57650036 ref NC_002951.2 :1011207-1011927 | q1 | q2 | OK | 25.6136 | 179.086 | 2.80567      | -3.72227     | 0.0001974 | 0.0097866 |

|         |         |           |                                              |    |    |    |   |         |              |              |           |          |
|---------|---------|-----------|----------------------------------------------|----|----|----|---|---------|--------------|--------------|-----------|----------|
| gene990 | gene990 | SACOL1004 | gi 57650036 ref NC_002951.2 :1012047-1013034 | q1 | q2 | OK | 0 | 1.12097 | 1.79769e+308 | 1.79769e+308 | 0.0094397 | 0.161634 |
|---------|---------|-----------|----------------------------------------------|----|----|----|---|---------|--------------|--------------|-----------|----------|

---

**Supplementary Table S10. Differentially expressed genes in MVR compared with M36C05, related to Figure 3d**

| test_id  | gene_id  | gene      | locus                                        | MVR | M36C05 | status | FPKM(MVR) | FPKM(M36C05) | log2(fold_change) | test_stat    | p_value   | q_value  |
|----------|----------|-----------|----------------------------------------------|-----|--------|--------|-----------|--------------|-------------------|--------------|-----------|----------|
| gene1019 | gene1019 | SACOL1033 | gi 57650036 ref NC_002951.2 :1043318-1043537 | q1  | q2     | OK     | 585.86    | 3799.56      | 2.69721           | -3.40271     | 0.0006672 | 0.025286 |
| gene1028 | gene1028 | SACOL1042 | gi 57650036 ref NC_002951.2 :1050522-1050810 | q1  | q2     | OK     | 20.1498   | 5.61968      | -1.8422           | 2.10066      | 0.0356705 | 0.361045 |
| gene1029 | gene1029 | SACOL1043 | gi 57650036 ref NC_002951.2 :1050815-1052297 | q1  | q2     | OK     | 31.335    | 7.39445      | -2.08326          | 2.9242       | 0.0034534 | 0.084925 |
| gene1042 | gene1042 | sspB1     | gi 57650036 ref NC_002951.2 :1061752-1062934 | q1  | q2     | OK     | 3.17438   | 8.42043      | 1.40742           | -2.01764     | 0.0436287 | 0.40838  |
| gene1051 | gene1051 | SACOL1066 | gi 57650036 ref NC_002951.2 :1074465-1075659 | q1  | q2     | OK     | 31.532    | 8.09686      | -1.96138          | 2.79267      | 0.0052276 | 0.110421 |
| gene1066 | gene1066 | purN      | gi 57650036 ref NC_002951.2 :1090827-1091394 | q1  | q2     | OK     | 333.041   | 58.9639      | -2.49779          | 3.23361      | 0.0012224 | 0.039669 |
| gene1067 | gene1067 | purH      | gi 57650036 ref NC_002951.2 :1091408-1092887 | q1  | q2     | OK     | 280.592   | 48.2629      | -2.53949          | 2.9401       | 0.0032811 | 0.082163 |
| gene1068 | gene1068 | purD      | gi 57650036 ref NC_002951.2 :1092908-1094156 | q1  | q2     | OK     | 480.77    | 62.4864      | -2.94373          | 3.3501       | 0.0008078 | 0.029231 |
| gene1072 | gene1072 | SACOL1087 | gi 57650036 ref NC_002951.2 :1097856-1097991 | q1  | q2     | OK     | 0         | 343.556      | 1.79769e+308      | 1.79769e+308 | 0.0094397 | 0.161634 |
| gene1075 | gene1075 | SACOL1090 | gi 57650036 ref NC_002951.2 :1101088-1101631 | q1  | q2     | OK     | 40.0997   | 246.264      | 2.61855           | -3.50005     | 0.0004652 | 0.019237 |
| gene1092 | gene1092 | SACOL1107 | gi 57650036 ref NC_002951.2 :1117542-1118082 | q1  | q2     | OK     | 6.83875   | 1.62379      | -2.07437          | 2.39594      | 0.0165778 | 0.231163 |
| gene1093 | gene1093 | SACOL1108 | gi 57650036 ref NC_002951.2 :1118094-1119979 | q1  | q2     | OK     | 7.7884    | 1.97115      | -1.98229          | 2.22998      | 0.0257486 | 0.304771 |
| gene1096 | gene1096 | SACOL1111 | gi 57650036 ref NC_002951.2 :1119984-1121867 | q1  | q2     | OK     | 14.9983   | 49.833       | 1.7323            | -2.21639     | 0.0266646 | 0.309278 |
| gene1103 | gene1103 | typA      | gi 57650036 ref NC_002951.2 :1127324-1129172 | q1  | q2     | OK     | 92.487    | 23.8749      | -1.95375          | 2.42395      | 0.0153527 | 0.217431 |
| gene1111 | gene1111 | SACOL1126 | gi 57650036 ref NC_002951.2 :1138351-1138813 | q1  | q2     | OK     | 202.463   | 66.5594      | -1.60495          | 2.21009      | 0.0270986 | 0.310305 |
| gene1117 | gene1117 | SACOL1132 | gi 57650036 ref NC_002951.2 :1142111-1142501 | q1  | q2     | OK     | 16.8603   | 5.77234      | -1.5464           | 1.99375      | 0.0461795 | 0.423039 |
| gene1121 | gene1121 | SACOL1136 | gi 57650036 ref NC_002951.2 :1144924-1145482 | q1  | q2     | OK     | 189.442   | 64.1493      | -1.56225          | 2.10115      | 0.0356282 | 0.361045 |
| gene1152 | gene1152 | efb       | gi 57650036 ref NC_002951.2 :1176733-1177231 | q1  | q2     | OK     | 246.745   | 57.8039      | -2.09378          | 2.8268       | 0.0047016 | 0.101483 |
| gene1153 | gene1153 | SACOL1169 | gi 57650036 ref NC_002951.2 :1177384-1177735 | q1  | q2     | OK     | 355.287   | 69.4914      | -2.35408          | 3.26685      | 0.0010875 | 0.036437 |
| gene117  | gene117  | deoD1     | gi 57650036 ref NC_002951.2 :136273-136981   | q1  | q2     | OK     | 6.03981   | 1.52046      | -1.99             | 2.45221      | 0.0141981 | 0.205915 |
| gene1179 | gene1179 | pbb1      | gi 57650036 ref NC_002951.2 :1197272-1199874 | q1  | q2     | OK     | 68.1178   | 11.6971      | -2.54188          | 2.75296      | 0.0059059 | 0.119299 |
| gene1180 | gene1180 | mraY      | gi 57650036 ref NC_002951.2 :1200165-1201131 | q1  | q2     | OK     | 38.3804   | 5.75868      | -2.73656          | 3.87295      | 0.0001075 | 0.006079 |
| gene1181 | gene1181 | murD      | gi 57650036 ref NC_002951.2 :1201132-1202482 | q1  | q2     | OK     | 54.5888   | 9.29829      | -2.55357          | 3.4924       | 0.0004787 | 0.019573 |
| gene1191 | gene1191 | ileS      | gi 57650036 ref NC_002951.2 :1210895-1213649 | q1  | q2     | OK     | 69.4739   | 14.0221      | -2.30877          | 2.84825      | 0.004396  | 0.098191 |
| gene1194 | gene1194 | SACOL1209 | gi 57650036 ref NC_002951.2 :1215559-1216968 | q1  | q2     | OK     | 42.2978   | 13.2099      | -1.67897          | 2.105        | 0.0352912 | 0.359216 |
| gene1195 | gene1195 | pyrR      | gi 57650036 ref NC_002951.2 :1217367-1217895 | q1  | q2     | OK     | 92.1964   | 32.6549      | -1.49741          | 2.14071      | 0.0322978 | 0.344846 |
| gene1196 | gene1196 | uraA      | gi 57650036 ref NC_002951.2 :1218112-1219420 | q1  | q2     | OK     | 70.461    | 9.05405      | -2.96019          | 3.99196      | 6.55E-05  | 0.004019 |
| gene1197 | gene1197 | pyrB      | gi 57650036 ref NC_002951.2 :1219447-1220329 | q1  | q2     | OK     | 109.217   | 10.1885      | -3.42219          | 4.63047      | 3.65E-06  | 0.000343 |
| gene1198 | gene1198 | pyrC      | gi 57650036 ref NC_002951.2 :1220346-1221621 | q1  | q2     | OK     | 137.5     | 15.8955      | -3.11274          | 3.98763      | 6.67E-05  | 0.004025 |



|          |          |           |                                              |    |    |    |          |         |          |          |           |          |
|----------|----------|-----------|----------------------------------------------|----|----|----|----------|---------|----------|----------|-----------|----------|
| gene1199 | gene1199 | carA      | gi 57650036 ref NC_002951.2 :1221622-1225889 | q1 | q2 | OK | 102.824  | 8.4439  | -3.60612 | 1.97516  | 0.0482499 | 0.431092 |
| gene1200 | gene1200 | carB      | gi 57650036 ref NC_002951.2 :1221622-1225889 | q1 | q2 | OK | 115.479  | 8.48446 | -3.76667 | 3.91745  | 8.95E-05  | 0.005223 |
| gene1201 | gene1201 | pyrF      | gi 57650036 ref NC_002951.2 :1225998-1227302 | q1 | q2 | OK | 94.7395  | 9.62462 | -3.29916 | 3.70961  | 0.0002076 | 0.010151 |
| gene1202 | gene1202 | pyrE      | gi 57650036 ref NC_002951.2 :1225998-1227302 | q1 | q2 | OK | 62.8205  | 3.75093 | -4.06591 | 3.00031  | 0.002697  | 0.071496 |
| gene1230 | gene1230 | acpP      | gi 57650036 ref NC_002951.2 :1255310-1255544 | q1 | q2 | OK | 920.482  | 298.025 | -1.62696 | 2.25835  | 0.0239238 | 0.292955 |
| gene1236 | gene1236 | rpsP      | gi 57650036 ref NC_002951.2 :1263500-1263776 | q1 | q2 | OK | 289.503  | 57.5055 | -2.33181 | 3.35306  | 0.0007992 | 0.029065 |
| gene1239 | gene1239 | rplS      | gi 57650036 ref NC_002951.2 :1265306-1265657 | q1 | q2 | OK | 891.905  | 148.296 | -2.58841 | 3.3333   | 0.0008582 | 0.030901 |
| gene1246 | gene1246 | eprH      | gi 57650036 ref NC_002951.2 :1274120-1275365 | q1 | q2 | OK | 4.5824   | 1.68797 | -1.44081 | 1.97752  | 0.0479825 | 0.430141 |
| gene1254 | gene1254 | rpsB      | gi 57650036 ref NC_002951.2 :1284585-1285350 | q1 | q2 | OK | 287.805  | 59.3596 | -2.27754 | 2.83934  | 0.0045207 | 0.09914  |
| gene1260 | gene1260 | cdsA      | gi 57650036 ref NC_002951.2 :1289006-1289789 | q1 | q2 | OK | 41.9435  | 15.1379 | -1.47028 | 2.1217   | 0.0338627 | 0.352611 |
| gene1269 | gene1269 | rbfA      | gi 57650036 ref NC_002951.2 :1302688-1303039 | q1 | q2 | OK | 86.7612  | 30.0891 | -1.52781 | 2.22281  | 0.0262285 | 0.307643 |
| gene1270 | gene1270 | truB      | gi 57650036 ref NC_002951.2 :1303207-1304125 | q1 | q2 | OK | 9.85825  | 39.7832 | 2.01276  | -2.87322 | 0.0040631 | 0.094761 |
| gene1272 | gene1272 | rpsO      | gi 57650036 ref NC_002951.2 :1305225-1305495 | q1 | q2 | OK | 2141.74  | 625.953 | -1.77466 | 2.17327  | 0.0297597 | 0.32831  |
| gene128  | gene128  | SACOL0134 | gi 57650036 ref NC_002951.2 :149516-150001   | q1 | q2 | OK | 0.446706 | 3.48667 | 2.96445  | -2.02507 | 0.0428605 | 0.405466 |
| gene1287 | gene1287 | SACOL1307 | gi 57650036 ref NC_002951.2 :1323638-1324436 | q1 | q2 | OK | 90.0488  | 32.4669 | -1.47174 | 2.0142   | 0.0439881 | 0.409179 |
| gene1296 | gene1296 | glpP      | gi 57650036 ref NC_002951.2 :1335100-1335643 | q1 | q2 | OK | 15.1976  | 4.82871 | -1.65413 | 2.25999  | 0.0238219 | 0.292955 |
| gene130  | gene130  | cap5A     | gi 57650036 ref NC_002951.2 :153404-154073   | q1 | q2 | OK | 3.6785   | 262.128 | 6.15501  | -7.60612 | 2.82E-14  | 5.10E-11 |
| gene1305 | gene1305 | SACOL1327 | gi 57650036 ref NC_002951.2 :1344713-1345952 | q1 | q2 | OK | 20.2241  | 5.72983 | -1.81951 | 2.63081  | 0.0085183 | 0.151839 |
| gene131  | gene131  | cap5B     | gi 57650036 ref NC_002951.2 :154088-154775   | q1 | q2 | OK | 1.51526  | 124.852 | 6.36451  | -7.49265 | 6.75E-14  | 7.00E-11 |
| gene132  | gene132  | cap5C     | gi 57650036 ref NC_002951.2 :154777-155542   | q1 | q2 | OK | 2.05344  | 95.2877 | 5.53618  | -6.94097 | 3.89E-12  | 2.58E-09 |
| gene133  | gene133  | cap5D     | gi 57650036 ref NC_002951.2 :155561-158403   | q1 | q2 | OK | 1.75466  | 85.9854 | 5.61483  | -5.86407 | 4.52E-09  | 1.13E-06 |
| gene134  | gene134  | cap5E     | gi 57650036 ref NC_002951.2 :155561-158403   | q1 | q2 | OK | 2.17933  | 57.9945 | 4.73396  | -3.22461 | 0.0012615 | 0.040574 |
| gene1343 | gene1343 | SACOL1367 | gi 57650036 ref NC_002951.2 :1372141-1373596 | q1 | q2 | OK | 27.7937  | 83.9684 | 1.59509  | -2.03866 | 0.0414837 | 0.396065 |
| gene1344 | gene1344 | kataA     | gi 57650036 ref NC_002951.2 :1373895-1375317 | q1 | q2 | OK | 469.834  | 2052.29 | 2.12701  | -2.22509 | 0.0260752 | 0.306341 |
| gene1347 | gene1347 | guaC      | gi 57650036 ref NC_002951.2 :1376436-1377515 | q1 | q2 | OK | 20.8626  | 3.96883 | -2.39413 | 3.41127  | 0.0006466 | 0.02476  |
| gene135  | gene135  | cap5F     | gi 57650036 ref NC_002951.2 :158415-159525   | q1 | q2 | OK | 2.83821  | 47.6174 | 4.06843  | -5.49995 | 3.80E-08  | 7.43E-06 |
| gene1354 | gene1354 | SACOL1378 | gi 57650036 ref NC_002951.2 :1382592-1382920 | q1 | q2 | OK | 463.645  | 80.0577 | -2.53391 | 3.62326  | 0.0002909 | 0.013113 |
| gene1356 | gene1356 | SACOL1380 | gi 57650036 ref NC_002951.2 :1383013-1383481 | q1 | q2 | OK | 44.3855  | 12.3565 | -1.84482 | 2.65307  | 0.0079762 | 0.14471  |
| gene1358 | gene1358 | sbcC      | gi 57650036 ref NC_002951.2 :1384729-1387759 | q1 | q2 | OK | 10.9231  | 3.73784 | -1.54711 | 2.20159  | 0.0276941 | 0.315942 |
| gene136  | gene136  | cap5G     | gi 57650036 ref NC_002951.2 :159528-160653   | q1 | q2 | OK | 2.9857   | 38.3815 | 3.68427  | -5.05219 | 4.37E-07  | 5.85E-05 |
| gene1360 | gene1360 | opuD1     | gi 57650036 ref NC_002951.2 :1388395-1390042 | q1 | q2 | OK | 207.891  | 23.7656 | -3.12888 | 3.74773  | 0.0001784 | 0.009234 |
| gene1367 | gene1367 | SACOL1392 | gi 57650036 ref NC_002951.2 :1400621-1402097 | q1 | q2 | OK | 68.5759  | 21.7694 | -1.6554  | 2.16563  | 0.0303393 | 0.33167  |
| gene1402 | gene1402 | SACOL1427 | gi 57650036 ref NC_002951.2 :1438139-1439741 | q1 | q2 | OK | 29.9225  | 9.51279 | -1.65329 | 2.30794  | 0.0210027 | 0.271422 |

|          |          |           |                                              |    |    |    |         |         |              |              |           |          |
|----------|----------|-----------|----------------------------------------------|----|----|----|---------|---------|--------------|--------------|-----------|----------|
| gene141  | gene141  | cap5L     | gi 57650036 ref NC_002951.2 :164774-165980   | q1 | q2 | OK | 2.67994 | 11.6167 | 2.11593      | -3.00583     | 0.0026486 | 0.071126 |
| gene1426 | gene1426 | arlR      | gi 57650036 ref NC_002951.2 :1464054-1466066 | q1 | q2 | OK | 13.2744 | 119.478 | 3.17003      | -2.84623     | 0.004424  | 0.098512 |
| gene1436 | gene1436 | thyA      | gi 57650036 ref NC_002951.2 :1474464-1475421 | q1 | q2 | OK | 20.1836 | 55.5043 | 1.45942      | -2.0319      | 0.0421642 | 0.400763 |
| gene144  | gene144  | cap5O     | gi 57650036 ref NC_002951.2 :167488-168751   | q1 | q2 | OK | 3.88386 | 10.8896 | 1.48739      | -2.15495     | 0.0311657 | 0.337139 |
| gene1452 | gene1452 | SACOL1482 | gi 57650036 ref NC_002951.2 :1523577-1523910 | q1 | q2 | OK | 17.6157 | 3.21226 | -2.4552      | 2.72312      | 0.0064668 | 0.126644 |
| gene1478 | gene1478 | ndk       | gi 57650036 ref NC_002951.2 :1549035-1549485 | q1 | q2 | OK | 187.225 | 50.753  | -1.88321     | 2.62596      | 0.0086405 | 0.152769 |
| gene1490 | gene1490 | SACOL1522 | gi 57650036 ref NC_002951.2 :1560352-1561813 | q1 | q2 | OK | 233.186 | 926.161 | 1.98978      | -2.09394     | 0.0362653 | 0.365532 |
| gene150  | gene150  | SACOL0156 | gi 57650036 ref NC_002951.2 :174334-174538   | q1 | q2 | OK | 60.0788 | 830.669 | 3.78935      | -5.10114     | 3.38E-07  | 4.89E-05 |
| gene1506 | gene1506 | SACOL1539 | gi 57650036 ref NC_002951.2 :1577030-1577537 | q1 | q2 | OK | 8.2479  | 39.5649 | 2.26212      | -3.18925     | 0.0014264 | 0.044882 |
| gene1521 | gene1521 | SACOL1555 | gi 57650036 ref NC_002951.2 :1591771-1592905 | q1 | q2 | OK | 43.5072 | 132.449 | 1.60612      | -2.01723     | 0.0436718 | 0.40838  |
| gene1540 | gene1540 | SACOL1574 | gi 57650036 ref NC_002951.2 :1609249-1609591 | q1 | q2 | OK | 0       | 8.33297 | 1.79769e+308 | 1.79769e+308 | 0.0060633 | 0.121216 |
| gene1574 | gene1574 | rpmG      | gi 57650036 ref NC_002951.2 :1638641-1638791 | q1 | q2 | OK | 2264.82 | 474.778 | -2.25407     | 3.21493      | 0.0013048 | 0.041699 |
| gene1608 | gene1608 | rpsT      | gi 57650036 ref NC_002951.2 :1674065-1674317 | q1 | q2 | OK | 900.018 | 311.748 | -1.52958     | 2.08479      | 0.0370881 | 0.369812 |
| gene1609 | gene1609 | holA      | gi 57650036 ref NC_002951.2 :1674361-1675336 | q1 | q2 | OK | 17.2862 | 6.11861 | -1.49834     | 2.17847      | 0.0293712 | 0.325512 |
| gene1618 | gene1618 | aroE      | gi 57650036 ref NC_002951.2 :1681390-1682197 | q1 | q2 | OK | 37.5097 | 11.4491 | -1.71203     | 2.47471      | 0.0133346 | 0.198974 |
| gene1619 | gene1619 | SACOL1653 | gi 57650036 ref NC_002951.2 :1682210-1683311 | q1 | q2 | OK | 29.6736 | 8.68865 | -1.77197     | 2.54396      | 0.0109603 | 0.176265 |
| gene1620 | gene1620 | SACOL1654 | gi 57650036 ref NC_002951.2 :1683311-1683839 | q1 | q2 | OK | 39.5676 | 14.1392 | -1.48462     | 2.15924      | 0.0308315 | 0.336036 |
| gene1645 | gene1645 | SACOL1679 | gi 57650036 ref NC_002951.2 :1709623-1709770 | q1 | q2 | OK | 149.794 | 2298.48 | 3.93963      | -4.87708     | 1.08E-06  | 0.000122 |
| gene1646 | gene1646 | SACOL1680 | gi 57650036 ref NC_002951.2 :1709809-1709992 | q1 | q2 | OK | 23.4188 | 348.89  | 3.89703      | -4.38249     | 1.17E-05  | 0.000913 |
| gene1650 | gene1650 | aspS      | gi 57650036 ref NC_002951.2 :1713267-1715034 | q1 | q2 | OK | 33.1294 | 11.324  | -1.54873     | 2.12559      | 0.0335373 | 0.350737 |
| gene1651 | gene1651 | hisS      | gi 57650036 ref NC_002951.2 :1715049-1716312 | q1 | q2 | OK | 18.4624 | 6.0152  | -1.61791     | 2.34709      | 0.0189206 | 0.250785 |
| gene1659 | gene1659 | tgt       | gi 57650036 ref NC_002951.2 :1726574-1727714 | q1 | q2 | OK | 66.0146 | 13.9579 | -2.2417      | 3.06277      | 0.002193  | 0.061515 |
| gene166  | gene166  | entB      | gi 57650036 ref NC_002951.2 :198037-198535   | q1 | q2 | OK | 7.87711 | 24.4555 | 1.63442      | -2.29481     | 0.0217441 | 0.276559 |
| gene1660 | gene1660 | queA      | gi 57650036 ref NC_002951.2 :1727736-1728762 | q1 | q2 | OK | 31.4997 | 11.6144 | -1.43943     | 2.06984      | 0.0384676 | 0.382368 |
| gene1666 | gene1666 | SACOL1701 | gi 57650036 ref NC_002951.2 :1732826-1733147 | q1 | q2 | OK | 173.233 | 65.371  | -1.40599     | 2.04465      | 0.0408898 | 0.394682 |
| gene1681 | gene1681 | hemC      | gi 57650036 ref NC_002951.2 :1747721-1748648 | q1 | q2 | OK | 30.444  | 8.79856 | -1.79082     | 2.58818      | 0.0096484 | 0.163144 |
| gene1689 | gene1689 | rplT      | gi 57650036 ref NC_002951.2 :1756408-1756765 | q1 | q2 | OK | 395.003 | 64.9686 | -2.60405     | 3.58521      | 0.0003368 | 0.014772 |
| gene1690 | gene1690 | rpmI      | gi 57650036 ref NC_002951.2 :1756811-1757012 | q1 | q2 | OK | 96.8904 | 31.4399 | -1.62376     | 2.05746      | 0.0396416 | 0.387684 |
| gene1691 | gene1691 | infC      | gi 57650036 ref NC_002951.2 :1757040-1757568 | q1 | q2 | OK | 124.081 | 33.3282 | -1.89647     | 2.66651      | 0.0076642 | 0.141495 |
| gene1692 | gene1692 | SACOL1728 | gi 57650036 ref NC_002951.2 :1757796-1759290 | q1 | q2 | OK | 14.6445 | 52.8993 | 1.85289      | -2.49578     | 0.0125681 | 0.192701 |
| gene1693 | gene1693 | thrS      | gi 57650036 ref NC_002951.2 :1759715-1761653 | q1 | q2 | OK | 140.831 | 25.2379 | -2.48031     | 2.97637      | 0.0029169 | 0.076207 |
| gene17   | gene17   | purA      | gi 57650036 ref NC_002951.2 :22464-23748     | q1 | q2 | OK | 32.5521 | 5.18668 | -2.64987     | 3.73275      | 0.0001894 | 0.009585 |

|          |          |           |                                              |    |    |    |         |         |              |              |           |          |
|----------|----------|-----------|----------------------------------------------|----|----|----|---------|---------|--------------|--------------|-----------|----------|
| gene1717 | gene1717 | SACOL1754 | gi 57650036 ref NC_002951.2 :1795257-1795946 | q1 | q2 | OK | 64.7503 | 237.171 | 1.87297      | -2.39213     | 0.0167511 | 0.231351 |
| gene1720 | gene1720 | ald2      | gi 57650036 ref NC_002951.2 :1797491-1798610 | q1 | q2 | OK | 305.929 | 75.3451 | -2.02161     | 2.36073      | 0.0182391 | 0.244437 |
| gene1725 | gene1725 | SACOL1763 | gi 57650036 ref NC_002951.2 :1802448-1803219 | q1 | q2 | OK | 14.9647 | 4.83017 | -1.63142     | 2.32658      | 0.0199878 | 0.260836 |
| gene1731 | gene1731 | rpsD      | gi 57650036 ref NC_002951.2 :1808535-1809138 | q1 | q2 | OK | 373.056 | 66.8362 | -2.48069     | 3.14066      | 0.0016857 | 0.05083  |
| gene1733 | gene1733 | SACOL1771 | gi 57650036 ref NC_002951.2 :1810176-1810623 | q1 | q2 | OK | 16.4139 | 66.1029 | 2.0098       | -2.88593     | 0.0039025 | 0.092279 |
| gene1738 | gene1738 | SACOL1776 | gi 57650036 ref NC_002951.2 :1816468-1817086 | q1 | q2 | OK | 48.3649 | 14.2598 | -1.762       | 2.55379      | 0.0106558 | 0.173684 |
| gene1740 | gene1740 | tyrS      | gi 57650036 ref NC_002951.2 :1818625-1819888 | q1 | q2 | OK | 21.896  | 5.80778 | -1.91461     | 2.75896      | 0.0057986 | 0.118414 |
| gene1749 | gene1749 | SACOL1788 | gi 57650036 ref NC_002951.2 :1833624-1835142 | q1 | q2 | OK | 70.6896 | 361.875 | 2.35592      | -2.64055     | 0.0082771 | 0.148512 |
| gene1750 | gene1750 | SACOL1789 | gi 57650036 ref NC_002951.2 :1835215-1835707 | q1 | q2 | OK | 442.383 | 2228.77 | 2.33288      | -2.56084     | 0.0104421 | 0.17225  |
| gene1763 | gene1763 | SACOL1802 | gi 57650036 ref NC_002951.2 :1851012-1851435 | q1 | q2 | OK | 26.4529 | 226.759 | 3.09966      | -4.27045     | 1.95E-05  | 0.001398 |
| gene1770 | gene1770 | SACOL1809 | gi 57650036 ref NC_002951.2 :1865520-1866702 | q1 | q2 | OK | 24.3572 | 8.30816 | -1.55175     | 2.23946      | 0.0251261 | 0.301055 |
| gene1782 | gene1782 | SACOL1821 | gi 57650036 ref NC_002951.2 :1876440-1877943 | q1 | q2 | OK | 3.56678 | 21.4872 | 2.59079      | -3.67366     | 0.0002391 | 0.011164 |
| gene1792 | gene1792 | tal       | gi 57650036 ref NC_002951.2 :1885159-1885873 | q1 | q2 | OK | 267.272 | 1026.97 | 1.94202      | -2.13086     | 0.0331008 | 0.34869  |
| gene1798 | gene1798 | metK      | gi 57650036 ref NC_002951.2 :1891566-1892760 | q1 | q2 | OK | 38.0434 | 14.3081 | -1.41081     | 1.97991      | 0.0477139 | 0.429484 |
| gene1809 | gene1809 | SACOL1848 | gi 57650036 ref NC_002951.2 :1902465-1903092 | q1 | q2 | OK | 10.5887 | 3.36042 | -1.65581     | 2.22564      | 0.0260381 | 0.306341 |
| gene1810 | gene1810 | SACOL1849 | gi 57650036 ref NC_002951.2 :1903132-1903477 | q1 | q2 | OK | 10.827  | 2.23011 | -2.27944     | 2.34012      | 0.0192776 | 0.25412  |
| gene1811 | gene1811 | SACOL1850 | gi 57650036 ref NC_002951.2 :1903574-1904126 | q1 | q2 | OK | 12.4675 | 2.82307 | -2.14284     | 2.76173      | 0.0057496 | 0.118209 |
| gene1830 | gene1830 | epiG      | gi 57650036 ref NC_002951.2 :1923504-1925650 | q1 | q2 | OK | 15.0162 | 161.648 | 3.42826      | -2.21751     | 0.0265882 | 0.309278 |
| gene1831 | gene1831 | epiE      | gi 57650036 ref NC_002951.2 :1923504-1925650 | q1 | q2 | OK | 14.3455 | 148.014 | 3.36707      | -2.22898     | 0.0258152 | 0.304771 |
| gene1832 | gene1832 | epiF      | gi 57650036 ref NC_002951.2 :1923504-1925650 | q1 | q2 | OK | 16.2054 | 280.457 | 4.11323      | -3.18219     | 0.0014616 | 0.045484 |
| gene1833 | gene1833 | epiP      | gi 57650036 ref NC_002951.2 :1925672-1927046 | q1 | q2 | OK | 4.9839  | 68.1696 | 3.77378      | -5.05699     | 4.26E-07  | 5.82E-05 |
| gene1837 | gene1837 | epiA      | gi 57650036 ref NC_002951.2 :1931884-1932028 | q1 | q2 | OK | 0       | 74.8453 | 1.79769e+308 | 1.79769e+308 | 0.0351354 | 0.35865  |
| gene1861 | gene1861 | SACOL1895 | gi 57650036 ref NC_002951.2 :1949050-1949416 | q1 | q2 | OK | 131.93  | 668.651 | 2.34148      | -3.0438      | 0.0023361 | 0.065024 |
| gene1869 | gene1869 | SACOL1904 | gi 57650036 ref NC_002951.2 :1959541-1960006 | q1 | q2 | OK | 73.9117 | 10.413  | -2.82742     | 3.99696      | 6.42E-05  | 0.003969 |
| gene1874 | gene1874 | SACOL1909 | gi 57650036 ref NC_002951.2 :1965146-1965542 | q1 | q2 | OK | 41.641  | 8.40315 | -2.309       | 3.17432      | 0.0015019 | 0.046448 |
| gene1876 | gene1876 | SACOL1911 | gi 57650036 ref NC_002951.2 :1966318-1966471 | q1 | q2 | OK | 698.883 | 2787.74 | 1.99597      | -2.87035     | 0.0041002 | 0.094826 |
| gene1877 | gene1877 | SACOL1912 | gi 57650036 ref NC_002951.2 :1966495-1967095 | q1 | q2 | OK | 105.859 | 692.978 | 2.71066      | -3.23992     | 0.0011956 | 0.039106 |
| gene1909 | gene1909 | rrfD      | gi 57650036 ref NC_002951.2 :1976940-1977055 | q1 | q2 | OK | 776204  | 214973  | -1.85228     | 2.14         | 0.0323546 | 0.344846 |
| gene1928 | gene1928 | SACOL1933 | gi 57650036 ref NC_002951.2 :1997915-1998431 | q1 | q2 | OK | 58.1717 | 524.156 | 3.17161      | -4.02727     | 5.64E-05  | 0.003551 |
| gene1934 | gene1934 | SACOL1939 | gi 57650036 ref NC_002951.2 :2002583-2003048 | q1 | q2 | OK | 42.5113 | 812.631 | 4.25668      | -5.34474     | 9.05E-08  | 1.56E-05 |
| gene1935 | gene1935 | SACOL1940 | gi 57650036 ref NC_002951.2 :2003054-2003330 | q1 | q2 | OK | 256.905 | 1030.1  | 2.00348      | -2.64441     | 0.0081833 | 0.14732  |
| gene1936 | gene1936 | SACOL1941 | gi 57650036 ref NC_002951.2 :2003607-2004825 | q1 | q2 | OK | 11.7082 | 90.7543 | 2.95444      | -3.92747     | 8.58E-05  | 0.005051 |

|          |          |           |                                              |    |    |    |         |         |                  |                  |           |          |
|----------|----------|-----------|----------------------------------------------|----|----|----|---------|---------|------------------|------------------|-----------|----------|
| gene1945 | gene1945 | SACOL1950 | gi 57650036 ref NC_002951.2 :2011259-2011991 | q1 | q2 | OK | 69.4007 | 17.0063 | -2.02889         | 2.86631          | 0.0041529 | 0.094945 |
| gene1951 | gene1951 | SACOL1956 | gi 57650036 ref NC_002951.2 :2016425-2016956 | q1 | q2 | OK | 65.2429 | 179.808 | 1.46256          | -1.98369         | 0.0472906 | 0.426221 |
| gene1954 | gene1954 | gatB      | gi 57650036 ref NC_002951.2 :2020283-2021711 | q1 | q2 | OK | 112.259 | 36.9834 | -1.60187         | 1.98807          | 0.0468041 | 0.424995 |
| gene1955 | gene1955 | gatA      | gi 57650036 ref NC_002951.2 :2021723-2023181 | q1 | q2 | OK | 61.5188 | 20.8544 | -1.56068         | 2.06366          | 0.0390497 | 0.38357  |
| gene1974 | gene1974 | SACOL1980 | gi 57650036 ref NC_002951.2 :2043474-2044572 | q1 | q2 | OK | 6.75801 | 17.3126 | 1.35716          | -1.97663         | 0.048084  | 0.430141 |
| gene198  | gene198  | pflB      | gi 57650036 ref NC_002951.2 :239820-242070   | q1 | q2 | OK | 17.1776 | 77.7859 | 2.17898          | -2.70793         | 0.0067704 | 0.13101  |
| gene199  | gene199  | pflA      | gi 57650036 ref NC_002951.2 :242092-242848   | q1 | q2 | OK | 13.9577 | 43.654  | 1.64506          | -2.369           | 0.0178362 | 0.242627 |
| gene1992 | gene1992 | SACOL1998 | gi 57650036 ref NC_002951.2 :2058954-2059131 | q1 | q2 | OK | 0       | 31.7031 | 1.79769e+3<br>08 | 1.79769e+<br>308 | 0.0180909 | 0.243354 |
| gene1999 | gene1999 | SACOL2007 | gi 57650036 ref NC_002951.2 :2067483-2068708 | q1 | q2 | OK | 5.84241 | 163.166 | 4.80364          | -6.1158          | 9.61E-10  | 3.48E-07 |
| gene2005 | gene2005 | SACOL2014 | gi 57650036 ref NC_002951.2 :2074522-2075113 | q1 | q2 | OK | 4.45898 | 1.12936 | -1.9812          | 2.16994          | 0.0300112 | 0.330484 |
| gene2013 | gene2013 | hld       | gi 57650036 ref NC_002951.2 :2082767-2082902 | q1 | q2 | OK | 100.672 | 1288.34 | 3.67778          | -3.43907         | 0.0005837 | 0.022958 |
| gene2014 | gene2014 | agrB      | gi 57650036 ref NC_002951.2 :2083137-2083844 | q1 | q2 | OK | 101.836 | 827.743 | 3.02294          | -3.55066         | 0.0003843 | 0.016359 |
| gene2016 | gene2016 | argC2     | gi 57650036 ref NC_002951.2 :2083868-2085161 | q1 | q2 | OK | 41.4691 | 292.196 | 2.81683          | -3.32443         | 0.000886  | 0.031743 |
| gene2017 | gene2017 | agrA      | gi 57650036 ref NC_002951.2 :2085179-2085896 | q1 | q2 | OK | 86.3352 | 413.396 | 2.2595           | -2.73448         | 0.0062479 | 0.123837 |
| gene2065 | gene2065 | SACOL2072 | gi 57650036 ref NC_002951.2 :2137442-2138963 | q1 | q2 | OK | 230.427 | 25.3663 | -3.18332         | 3.81468          | 0.0001364 | 0.007591 |
| gene2070 | gene2070 | SACOL2077 | gi 57650036 ref NC_002951.2 :2143971-2144181 | q1 | q2 | OK | 9.23386 | 0       | 1.79769e+3<br>08 | 1.79769e+<br>308 | 0.0438457 | 0.40838  |
| gene2071 | gene2071 | SACOL2078 | gi 57650036 ref NC_002951.2 :2144192-2144486 | q1 | q2 | OK | 4.61712 | 0       | 1.79769e+3<br>08 | 1.79769e+<br>308 | 0.02679   | 0.309278 |
| gene2103 | gene2103 | tdk       | gi 57650036 ref NC_002951.2 :2170931-2171531 | q1 | q2 | OK | 63.1114 | 19.0424 | -1.72868         | 2.49208          | 0.0126997 | 0.19349  |
| gene2104 | gene2104 | rpmE2     | gi 57650036 ref NC_002951.2 :2171877-2172132 | q1 | q2 | OK | 659.538 | 75.7468 | -3.1222          | 4.35883          | 1.31E-05  | 0.000986 |
| gene2105 | gene2105 | rho       | gi 57650036 ref NC_002951.2 :2172249-2173566 | q1 | q2 | OK | 139.441 | 45.5961 | -1.61267         | 1.97673          | 0.048072  | 0.430141 |
| gene2106 | gene2106 | SACOL2114 | gi 57650036 ref NC_002951.2 :2173812-2175240 | q1 | q2 | OK | 41.3865 | 566.421 | 3.77464          | -4.30965         | 1.64E-05  | 0.001208 |
| gene2111 | gene2111 | pyrG      | gi 57650036 ref NC_002951.2 :2179334-2180945 | q1 | q2 | OK | 38.6259 | 9.21773 | -2.06708         | 2.84518          | 0.0044387 | 0.098536 |
| gene2112 | gene2112 | rpoE      | gi 57650036 ref NC_002951.2 :2181280-2181811 | q1 | q2 | OK | 130.866 | 45.0353 | -1.53896         | 2.14751          | 0.0317529 | 0.342022 |
| gene2114 | gene2114 | SACOL2122 | gi 57650036 ref NC_002951.2 :2183206-2184010 | q1 | q2 | OK | 16.9364 | 6.20962 | -1.44755         | 2.09397          | 0.0362625 | 0.365532 |
| gene2124 | gene2124 | SACOL2132 | gi 57650036 ref NC_002951.2 :2192914-2193328 | q1 | q2 | OK | 4.85919 | 28.8047 | 2.56752          | -3.31044         | 0.0009315 | 0.03261  |
| gene2128 | gene2128 | SACOL2136 | gi 57650036 ref NC_002951.2 :2197464-2198130 | q1 | q2 | OK | 15.7397 | 170.274 | 3.43539          | -4.61773         | 3.88E-06  | 0.00036  |
| gene2129 | gene2129 | czrA      | gi 57650036 ref NC_002951.2 :2198281-2198602 | q1 | q2 | OK | 42.1089 | 13.0742 | -1.6874          | 2.3027           | 0.0212955 | 0.273297 |
| gene2139 | gene2139 | SACOL2147 | gi 57650036 ref NC_002951.2 :2210385-2212518 | q1 | q2 | OK | 4.62651 | 24.116  | 2.382            | -3.31274         | 0.0009239 | 0.03261  |
| gene2140 | gene2140 | SACOL2148 | gi 57650036 ref NC_002951.2 :2212529-2214070 | q1 | q2 | OK | 10.4443 | 234.593 | 4.48937          | -3.00084         | 0.0026924 | 0.071496 |
| gene2141 | gene2141 | mtlD      | gi 57650036 ref NC_002951.2 :2212529-2214070 | q1 | q2 | OK | 8.54356 | 131.655 | 3.94578          | -4.2463          | 2.17E-05  | 0.001498 |

|          |          |           |                                              |    |    |    |         |         |          |          |           |          |
|----------|----------|-----------|----------------------------------------------|----|----|----|---------|---------|----------|----------|-----------|----------|
| gene2159 | gene2159 | SACOL2158 | gi 57650036 ref NC_002951.2 :2237138-2237612 | q1 | q2 | OK | 106.253 | 36.6643 | -1.53506 | 2.20114  | 0.027726  | 0.315942 |
| gene2160 | gene2160 | SACOL2159 | gi 57650036 ref NC_002951.2 :2237710-2239054 | q1 | q2 | OK | 29.9209 | 10.6962 | -1.48406 | 2.09858  | 0.035854  | 0.362396 |
| gene2165 | gene2165 | SACOL2164 | gi 57650036 ref NC_002951.2 :2242248-2243619 | q1 | q2 | OK | 70.263  | 10.7318 | -2.71088 | 3.63562  | 0.0002773 | 0.012783 |
| gene2168 | gene2168 | SACOL2167 | gi 57650036 ref NC_002951.2 :2245862-2246846 | q1 | q2 | OK | 28.2384 | 7.0329  | -2.00547 | 2.89086  | 0.003842  | 0.091461 |
| gene2169 | gene2169 | SACOL2168 | gi 57650036 ref NC_002951.2 :2247237-2248308 | q1 | q2 | OK | 5.24728 | 14.5584 | 1.47221  | -2.13733 | 0.0325711 | 0.346169 |
| gene2170 | gene2170 | SACOL2169 | gi 57650036 ref NC_002951.2 :2248314-2251252 | q1 | q2 | OK | 4.30844 | 22.3544 | 2.37532  | -2.86377 | 0.0041864 | 0.094974 |
| gene2174 | gene2174 | SACOL2173 | gi 57650036 ref NC_002951.2 :2255445-2255955 | q1 | q2 | OK | 613.801 | 13085   | 4.414    | -4.89478 | 9.84E-07  | 0.000116 |
| gene2175 | gene2175 | SACOL2174 | gi 57650036 ref NC_002951.2 :2256017-2256257 | q1 | q2 | OK | 111.485 | 2213.51 | 4.31141  | -5.5741  | 2.49E-08  | 5.00E-06 |
| gene2176 | gene2176 | SACOL2175 | gi 57650036 ref NC_002951.2 :2256269-2256818 | q1 | q2 | OK | 99.038  | 3337.43 | 5.07461  | -5.8939  | 3.77E-09  | 9.87E-07 |
| gene2177 | gene2177 | opuD2     | gi 57650036 ref NC_002951.2 :2256980-2258543 | q1 | q2 | OK | 26.0328 | 634.337 | 4.60684  | -5.31994 | 1.04E-07  | 1.71E-05 |
| gene2198 | gene2198 | SACOL2197 | gi 57650036 ref NC_002951.2 :2278882-2279308 | q1 | q2 | OK | 10.6033 | 463.694 | 5.45058  | -6.92813 | 4.26E-12  | 2.58E-09 |
| gene2207 | gene2207 | rpsI      | gi 57650036 ref NC_002951.2 :2288673-2289072 | q1 | q2 | OK | 651.818 | 123.658 | -2.39811 | 3.08679  | 0.0020233 | 0.057876 |
| gene2208 | gene2208 | rplM      | gi 57650036 ref NC_002951.2 :2289085-2289523 | q1 | q2 | OK | 178.136 | 35.2143 | -2.33875 | 3.28776  | 0.0010099 | 0.034802 |
| gene2242 | gene2242 | SACOL2241 | gi 57650036 ref NC_002951.2 :2307842-2308232 | q1 | q2 | OK | 195.441 | 617.063 | 1.65868  | -2.10678 | 0.0351365 | 0.35865  |
| gene2243 | gene2243 | SACOL2242 | gi 57650036 ref NC_002951.2 :2308423-2309758 | q1 | q2 | OK | 146.974 | 39.142  | -1.90877 | 2.34334  | 0.0191118 | 0.252566 |
| gene2274 | gene2274 | SACOL2276 | gi 57650036 ref NC_002951.2 :2336597-2337539 | q1 | q2 | OK | 6.27112 | 2.08081 | -1.59158 | 2.15731  | 0.0309816 | 0.336223 |
| gene2275 | gene2275 | SACOL2277 | gi 57650036 ref NC_002951.2 :2337937-2338846 | q1 | q2 | OK | 56.341  | 14.4666 | -1.96145 | 2.75565  | 0.0058576 | 0.119078 |
| gene2288 | gene2288 | SACOL2290 | gi 57650036 ref NC_002951.2 :2348766-2350722 | q1 | q2 | OK | 3.41075 | 11.8619 | 1.79817  | -2.59839 | 0.0093663 | 0.161634 |
| gene2289 | gene2289 | SACOL2291 | gi 57650036 ref NC_002951.2 :2351331-2352135 | q1 | q2 | OK | 255.457 | 74.3328 | -1.78101 | 2.19874  | 0.0278965 | 0.315942 |
| gene2290 | gene2290 | nhaC      | gi 57650036 ref NC_002951.2 :2352567-2353968 | q1 | q2 | OK | 6.01247 | 19.7338 | 1.71464  | -2.47076 | 0.0134826 | 0.200357 |
| gene2291 | gene2291 | SACOL2293 | gi 57650036 ref NC_002951.2 :2354062-2355145 | q1 | q2 | OK | 6.73982 | 35.214  | 2.38537  | -3.38171 | 0.0007204 | 0.027012 |
| gene2295 | gene2295 | SACOL2297 | gi 57650036 ref NC_002951.2 :2357958-2359083 | q1 | q2 | OK | 25.0539 | 8.5822  | -1.54561 | 2.23352  | 0.0255147 | 0.303701 |
| gene2296 | gene2296 | SACOL2298 | gi 57650036 ref NC_002951.2 :2359393-2360170 | q1 | q2 | OK | 31.8252 | 12.2365 | -1.37898 | 2.0075   | 0.0446959 | 0.413637 |
| gene2313 | gene2313 | SACOL2315 | gi 57650036 ref NC_002951.2 :2375491-2376022 | q1 | q2 | OK | 11.603  | 3.00235 | -1.95033 | 2.50336  | 0.012302  | 0.189861 |
| gene2319 | gene2319 | SACOL2321 | gi 57650036 ref NC_002951.2 :2382110-2382992 | q1 | q2 | OK | 49.3209 | 437.295 | 3.14834  | -3.77824 | 0.0001579 | 0.008405 |
| gene2324 | gene2324 | fosB      | gi 57650036 ref NC_002951.2 :2388865-2389285 | q1 | q2 | OK | 37.4541 | 13.5172 | -1.47033 | 2.10437  | 0.0353463 | 0.359272 |
| gene2325 | gene2325 | hutG      | gi 57650036 ref NC_002951.2 :2389540-2390476 | q1 | q2 | OK | 28.3346 | 334.448 | 3.56114  | -4.39372 | 1.11E-05  | 0.000877 |
| gene2337 | gene2337 | gltS      | gi 57650036 ref NC_002951.2 :2399778-2400987 | q1 | q2 | OK | 25.7678 | 7.53932 | -1.77306 | 2.5482   | 0.010828  | 0.175699 |
| gene2345 | gene2345 | SACOL2348 | gi 57650036 ref NC_002951.2 :2408129-2408777 | q1 | q2 | OK | 4.96351 | 1.47813 | -1.74759 | 2.0747   | 0.0380139 | 0.378414 |
| gene2351 | gene2351 | SACOL2354 | gi 57650036 ref NC_002951.2 :2413427-2414396 | q1 | q2 | OK | 11.0675 | 28.3942 | 1.35927  | -1.96728 | 0.0491507 | 0.435378 |
| gene2362 | gene2362 | SACOL2365 | gi 57650036 ref NC_002951.2 :2426086-2426716 | q1 | q2 | OK | 67.5267 | 475.898 | 2.81712  | -3.48144 | 0.0004987 | 0.020052 |
| gene2369 | gene2369 | SACOL2373 | gi 57650036 ref NC_002951.2 :2431126-2432404 | q1 | q2 | OK | 6.93588 | 2.35212 | -1.56012 | 2.21295  | 0.0269012 | 0.309278 |
| gene2370 | gene2370 | SACOL2374 | gi 57650036 ref NC_002951.2 :2432564-2433188 | q1 | q2 | OK | 25.5739 | 8.85111 | -1.53074 | 2.21385  | 0.0268392 | 0.309278 |

|          |          |           |                                              |    |    |    |         |         |              |              |           |          |
|----------|----------|-----------|----------------------------------------------|----|----|----|---------|---------|--------------|--------------|-----------|----------|
| gene2375 | gene2375 | SACOL2379 | gi 57650036 ref NC_002951.2 :2439935-2440358 | q1 | q2 | OK | 139.532 | 1079.45 | 2.95163      | -3.60805     | 0.0003085 | 0.013697 |
| gene2379 | gene2379 | SACOL2383 | gi 57650036 ref NC_002951.2 :2442841-2443207 | q1 | q2 | OK | 34.3651 | 12.4675 | -1.46277     | 2.0381       | 0.04154   | 0.39608  |
| gene2382 | gene2382 | SACOL2386 | gi 57650036 ref NC_002951.2 :2444801-2445971 | q1 | q2 | OK | 2.59643 | 13.5259 | 2.38112      | -3.36392     | 0.0007684 | 0.028229 |
| gene2413 | gene2413 | SACOL2418 | gi 57650036 ref NC_002951.2 :2476717-2478028 | q1 | q2 | OK | 16.0333 | 4.56441 | -1.81257     | 2.62472      | 0.008672  | 0.152769 |
| gene2427 | gene2427 | SACOL2433 | gi 57650036 ref NC_002951.2 :2491944-2492052 | q1 | q2 | OK | 6177.46 | 0       | 1.79769e+308 | 1.79769e+308 | 0.0166856 | 0.231165 |
| gene2445 | gene2445 | SACOL2453 | gi 57650036 ref NC_002951.2 :2511709-2513568 | q1 | q2 | OK | 20.466  | 68.7033 | 1.74715      | -2.01222     | 0.0441971 | 0.409545 |
| gene2450 | gene2450 | pnbA      | gi 57650036 ref NC_002951.2 :2517261-2518614 | q1 | q2 | OK | 14.2455 | 97.1388 | 2.76954      | -3.61552     | 0.0002997 | 0.013391 |
| gene2452 | gene2452 | SACOL2461 | gi 57650036 ref NC_002951.2 :2520258-2521690 | q1 | q2 | OK | 7.82413 | 50.2842 | 2.6841       | -3.12703     | 0.0017658 | 0.052807 |
| gene247  | gene247  | SACOL0257 | gi 57650036 ref NC_002951.2 :296294-297293   | q1 | q2 | OK | 6.03642 | 29.2591 | 2.27712      | -3.25879     | 0.0011189 | 0.037315 |
| gene2471 | gene2471 | SACOL2481 | gi 57650036 ref NC_002951.2 :2537619-2537985 | q1 | q2 | OK | 6.71501 | 71.524  | 3.41297      | -4.43909     | 9.03E-06  | 0.000778 |
| gene2472 | gene2472 | fabG2     | gi 57650036 ref NC_002951.2 :2538247-2539066 | q1 | q2 | OK | 11.1047 | 124.921 | 3.49177      | -4.69936     | 2.61E-06  | 0.000252 |
| gene2474 | gene2474 | SACOL2484 | gi 57650036 ref NC_002951.2 :2540948-2541371 | q1 | q2 | OK | 22.0925 | 204.034 | 3.20718      | -4.42492     | 9.65E-06  | 0.000812 |
| gene2476 | gene2476 | SACOL2486 | gi 57650036 ref NC_002951.2 :2542259-2542679 | q1 | q2 | OK | 26.8372 | 79.1006 | 1.55946      | -2.26082     | 0.0237701 | 0.292955 |
| gene2477 | gene2477 | SACOL2487 | gi 57650036 ref NC_002951.2 :2542945-2543368 | q1 | q2 | OK | 1.16277 | 5.92835 | 2.35007      | -2.13427     | 0.0328208 | 0.347766 |
| gene2491 | gene2491 | SACOL2502 | gi 57650036 ref NC_002951.2 :2556602-2556869 | q1 | q2 | OK | 24.6218 | 96.7736 | 1.97468      | -2.72201     | 0.0064886 | 0.126644 |
| gene2492 | gene2492 | SACOL2503 | gi 57650036 ref NC_002951.2 :2557012-2557321 | q1 | q2 | OK | 3.50209 | 29.4773 | 3.07332      | -3.31006     | 0.0009327 | 0.03261  |
| gene2507 | gene2507 | SACOL2519 | gi 57650036 ref NC_002951.2 :2578701-2579190 | q1 | q2 | OK | 132.678 | 2623.22 | 4.30533      | -4.97663     | 6.47E-07  | 8.36E-05 |
| gene2511 | gene2511 | SACOL2523 | gi 57650036 ref NC_002951.2 :2584089-2585710 | q1 | q2 | OK | 3.35957 | 11.094  | 1.72342      | -2.40901     | 0.0159959 | 0.224781 |
| gene2520 | gene2520 | SACOL2532 | gi 57650036 ref NC_002951.2 :2593791-2594076 | q1 | q2 | OK | 67.0867 | 252.557 | 1.91251      | -2.74343     | 0.0060801 | 0.121216 |
| gene2540 | gene2540 | SACOL2553 | gi 57650036 ref NC_002951.2 :2611337-2613077 | q1 | q2 | OK | 30.4785 | 169.691 | 2.47704      | -2.95261     | 0.003151  | 0.080296 |
| gene2541 | gene2541 | SACOL2554 | gi 57650036 ref NC_002951.2 :2613123-2614201 | q1 | q2 | OK | 15.0551 | 117.105 | 2.95947      | -3.95954     | 7.51E-05  | 0.004491 |
| gene2544 | gene2544 | SACOL2556 | gi 57650036 ref NC_002951.2 :2615458-2615677 | q1 | q2 | OK | 5831.75 | 1548.34 | -1.91321     | 2.26573      | 0.0234678 | 0.292317 |
| gene2545 | gene2545 | SACOL2557 | gi 57650036 ref NC_002951.2 :2616065-2616497 | q1 | q2 | OK | 218.469 | 52.7438 | -2.05035     | 2.84855      | 0.0043918 | 0.098191 |
| gene2548 | gene2548 | SACOL2561 | gi 57650036 ref NC_002951.2 :2619623-2620790 | q1 | q2 | OK | 101.955 | 30.2141 | -1.75464     | 2.27281      | 0.0230376 | 0.288469 |
| gene2550 | gene2550 | SACOL2563 | gi 57650036 ref NC_002951.2 :2621889-2623995 | q1 | q2 | OK | 14.7313 | 307.139 | 4.38194      | -5.13105     | 2.88E-07  | 4.26E-05 |
| gene2553 | gene2553 | SACOL2566 | gi 57650036 ref NC_002951.2 :2626695-2629185 | q1 | q2 | OK | 10.4541 | 1.3955  | -2.90522     | 4.09862      | 4.16E-05  | 0.002686 |
| gene2559 | gene2559 | SACOL2572 | gi 57650036 ref NC_002951.2 :2633236-2635645 | q1 | q2 | OK | 25.2703 | 86.7515 | 1.77944      | -2.14361     | 0.0320644 | 0.3441   |
| gene2564 | gene2564 | crtM      | gi 57650036 ref NC_002951.2 :2640353-2641217 | q1 | q2 | OK | 10.9638 | 39.5345 | 1.85037      | -2.65346     | 0.0079672 | 0.14471  |
| gene2566 | gene2566 | SACOL2579 | gi 57650036 ref NC_002951.2 :2641253-2644361 | q1 | q2 | OK | 21.0918 | 99.8358 | 2.24288      | -1.96518     | 0.0493937 | 0.436462 |
| gene2568 | gene2568 | SACOL2581 | gi 57650036 ref NC_002951.2 :2644535-2645303 | q1 | q2 | OK | 628.435 | 159.656 | -1.9768      | 2.24923      | 0.024498  | 0.296972 |
| gene2571 | gene2571 | isaA      | gi 57650036 ref NC_002951.2 :2648750-2649452 | q1 | q2 | OK | 2962.14 | 402.47  | -2.87969     | 3.09021      | 0.0020002 | 0.057671 |
| gene2583 | gene2583 | SACOL2597 | gi 57650036 ref NC_002951.2 :2657438-2658269 | q1 | q2 | OK | 13.1008 | 83.2097 | 2.66709      | -3.68452     | 0.0002291 | 0.01091  |

|          |          |           |                                              |    |    |    |         |          |              |              |           |          |
|----------|----------|-----------|----------------------------------------------|----|----|----|---------|----------|--------------|--------------|-----------|----------|
| gene2590 | gene2590 | SACOL2605 | gi 57650036 ref NC_002951.2 :2663464-2664274 | q1 | q2 | OK | 7.08439 | 51.7193  | 2.86799      | -4.03019     | 5.57E-05  | 0.003538 |
| gene2604 | gene2604 | SACOL2620 | gi 57650036 ref NC_002951.2 :2677588-2678926 | q1 | q2 | OK | 17.5872 | 101.811  | 2.53329      | -3.28573     | 0.0010172 | 0.034888 |
| gene2605 | gene2605 | SACOL2621 | gi 57650036 ref NC_002951.2 :2679183-2679600 | q1 | q2 | OK | 3.59098 | 104.02   | 4.85634      | -5.94576     | 2.75E-09  | 7.66E-07 |
| gene2609 | gene2609 | SACOL2625 | gi 57650036 ref NC_002951.2 :2684778-2685222 | q1 | q2 | OK | 20.5906 | 195.298  | 3.24561      | -4.47031     | 7.81E-06  | 0.000689 |
| gene2611 | gene2611 | betA      | gi 57650036 ref NC_002951.2 :2685992-2687702 | q1 | q2 | OK | 65.1788 | 2.91968  | -4.48052     | 5.89181      | 3.82E-09  | 9.87E-07 |
| gene2612 | gene2612 | betB      | gi 57650036 ref NC_002951.2 :2687962-2689453 | q1 | q2 | OK | 111.432 | 2.81761  | -5.30555     | 6.75942      | 1.39E-11  | 7.16E-09 |
| gene2614 | gene2614 | SACOL2630 | gi 57650036 ref NC_002951.2 :2689705-2690269 | q1 | q2 | OK | 33.1671 | 10.0095  | -1.72838     | 2.49488      | 0.0126    | 0.192783 |
| gene2616 | gene2616 | cudT      | gi 57650036 ref NC_002951.2 :2691406-2693029 | q1 | q2 | OK | 92.8101 | 3.40812  | -4.76723     | 6.15394      | 7.56E-10  | 3.04E-07 |
| gene2618 | gene2618 | nrdD      | gi 57650036 ref NC_002951.2 :2693547-2695931 | q1 | q2 | OK | 7.80089 | 35.1131  | 2.1703       | -2.38042     | 0.0172928 | 0.237924 |
| gene2621 | gene2621 | SACOL2638 | gi 57650036 ref NC_002951.2 :2698040-2698646 | q1 | q2 | OK | 11.6288 | 3.80647  | -1.61117     | 2.18313      | 0.0290265 | 0.324174 |
| gene2640 | gene2640 | arcA      | gi 57650036 ref NC_002951.2 :2718451-2719687 | q1 | q2 | OK | 8.37944 | 2.55397  | -1.71411     | 2.43912      | 0.0147229 | 0.210573 |
| gene265  | gene265  | SACOL0275 | gi 57650036 ref NC_002951.2 :313934-315269   | q1 | q2 | OK | 4.84297 | 1.74828  | -1.46996     | 2.04247      | 0.0411049 | 0.395011 |
| gene2654 | gene2654 | SACOL2671 | gi 57650036 ref NC_002951.2 :2740324-2746753 | q1 | q2 | OK | 12.3892 | 75.7456  | 2.61208      | -2.86918     | 0.0041154 | 0.094826 |
| gene2658 | gene2658 | secY      | gi 57650036 ref NC_002951.2 :2746763-2747975 | q1 | q2 | OK | 2.4269  | 0.653648 | -1.89253     | 2.26088      | 0.0237665 | 0.292955 |
| gene266  | gene266  | yukA      | gi 57650036 ref NC_002951.2 :315290-319730   | q1 | q2 | OK | 4.06522 | 1.5851   | -1.35876     | 1.97834      | 0.0478908 | 0.430141 |
| gene2663 | gene2663 | SACOL2681 | gi 57650036 ref NC_002951.2 :2757263-2757623 | q1 | q2 | OK | 29.5052 | 634.983  | 4.42767      | -5.79037     | 7.02E-09  | 1.69E-06 |
| gene2664 | gene2664 | SACOL2682 | gi 57650036 ref NC_002951.2 :2757707-2758319 | q1 | q2 | OK | 4.82076 | 30.2754  | 2.65081      | -3.67702     | 0.000236  | 0.011162 |
| gene2675 | gene2675 | SACOL2693 | gi 57650036 ref NC_002951.2 :2767031-2767097 | q1 | q2 | OK | 0       | 3.01E+06 | 1.79769e+308 | 1.79769e+308 | 0.0351354 | 0.35865  |
| gene2676 | gene2676 | geh       | gi 57650036 ref NC_002951.2 :2767124-2769167 | q1 | q2 | OK | 61.9303 | 232.372  | 1.90772      | -2.12383     | 0.033684  | 0.351535 |
| gene2691 | gene2691 | SACOL2709 | gi 57650036 ref NC_002951.2 :2781870-2782425 | q1 | q2 | OK | 2.11801 | 9.64162  | 2.18656      | -2.67174     | 0.0075458 | 0.140745 |
| gene2692 | gene2692 | SACOL2710 | gi 57650036 ref NC_002951.2 :2782453-2783302 | q1 | q2 | OK | 2.99381 | 13.0866  | 2.12803      | -2.95799     | 0.0030966 | 0.079597 |
| gene2693 | gene2693 | SACOL2711 | gi 57650036 ref NC_002951.2 :2783681-2784197 | q1 | q2 | OK | 159.522 | 582.861  | 1.86939      | -2.27384     | 0.0229758 | 0.288469 |
| gene2695 | gene2695 | SACOL2713 | gi 57650036 ref NC_002951.2 :2785560-2786517 | q1 | q2 | OK | 37.7346 | 12.8199  | -1.5575      | 2.22949      | 0.025781  | 0.304771 |
| gene2702 | gene2702 | SACOL2720 | gi 57650036 ref NC_002951.2 :2792353-2792929 | q1 | q2 | OK | 1.1621  | 15.2685  | 3.71575      | -4.17087     | 3.03E-05  | 0.002043 |
| gene2705 | gene2705 | SACOL2723 | gi 57650036 ref NC_002951.2 :2795280-2795793 | q1 | q2 | OK | 7.2705  | 85.0216  | 3.5477       | -4.86433     | 1.15E-06  | 0.000128 |
| gene2711 | gene2711 | SACOL2729 | gi 57650036 ref NC_002951.2 :2800171-2800522 | q1 | q2 | OK | 3.03664 | 0        | 1.79769e+308 | 1.79769e+308 | 0.02679   | 0.309278 |
| gene2713 | gene2713 | SACOL2731 | gi 57650036 ref NC_002951.2 :2801134-2801335 | q1 | q2 | OK | 2065.53 | 754.558  | -1.45281     | 1.96799      | 0.0490696 | 0.435378 |
| gene2722 | gene2722 | rpmH      | gi 57650036 ref NC_002951.2 :2809097-2809235 | q1 | q2 | OK | 3912.94 | 1201.95  | -1.70287     | 2.46142      | 0.0138388 | 0.204544 |
| gene290  | gene290  | SACOL0301 | gi 57650036 ref NC_002951.2 :334780-335626   | q1 | q2 | OK | 4.70038 | 18.9528  | 2.01156      | -2.87251     | 0.0040722 | 0.094761 |
| gene293  | gene293  | SACOL0305 | gi 57650036 ref NC_002951.2 :338871-339921   | q1 | q2 | OK | 28.6024 | 173.313  | 2.59917      | -3.29774     | 0.0009747 | 0.033912 |
| gene294  | gene294  | SACOL0306 | gi 57650036 ref NC_002951.2 :339933-340611   | q1 | q2 | OK | 48.5474 | 260.877  | 2.42591      | -3.12001     | 0.0018084 | 0.053859 |

|         |         |           |                                            |    |    |    |         |         |              |              |           |          |
|---------|---------|-----------|--------------------------------------------|----|----|----|---------|---------|--------------|--------------|-----------|----------|
| gene333 | gene333 | SACOL0345 | gi 57650036 ref NC_002951.2 :367359-367581 | q1 | q2 | OK | 13.541  | 50.0644 | 1.88645      | -2.16885     | 0.0300938 | 0.330484 |
| gene355 | gene355 | SACOL0367 | gi 57650036 ref NC_002951.2 :373931-375918 | q1 | q2 | OK | 1.4343  | 5.54048 | 1.94966      | -2.50933     | 0.0120959 | 0.187953 |
| gene379 | gene379 | SACOL0391 | gi 57650036 ref NC_002951.2 :398649-399477 | q1 | q2 | OK | 1.45212 | 6.85021 | 2.23799      | -2.84194     | 0.004484  | 0.098891 |
| gene392 | gene392 | SACOL0404 | gi 57650036 ref NC_002951.2 :410847-411267 | q1 | q2 | OK | 37.749  | 9.01146 | -2.06661     | 2.88394      | 0.0039273 | 0.092279 |
| gene394 | gene394 | SACOL0406 | gi 57650036 ref NC_002951.2 :412832-413273 | q1 | q2 | OK | 11.5031 | 3.20351 | -1.8443      | 2.25847      | 0.0239167 | 0.292955 |
| gene395 | gene395 | glpT      | gi 57650036 ref NC_002951.2 :413355-414714 | q1 | q2 | OK | 49.1063 | 12.6501 | -1.95676     | 2.68229      | 0.007312  | 0.137988 |
| gene396 | gene396 | SACOL0408 | gi 57650036 ref NC_002951.2 :415021-415882 | q1 | q2 | OK | 58.7487 | 174.375 | 1.56956      | -1.98576     | 0.0470602 | 0.426221 |
| gene407 | gene407 | SACOL0419 | gi 57650036 ref NC_002951.2 :424851-425241 | q1 | q2 | OK | 12.3871 | 51.3738 | 2.05219      | -2.8773      | 0.0040109 | 0.093938 |
| gene424 | gene424 | rpsF      | gi 57650036 ref NC_002951.2 :442693-442990 | q1 | q2 | OK | 326.056 | 87.6612 | -1.89511     | 2.70321      | 0.0068673 | 0.132529 |
| gene425 | gene425 | ssb2      | gi 57650036 ref NC_002951.2 :443010-443514 | q1 | q2 | OK | 216.302 | 46.4933 | -2.21795     | 3.02643      | 0.0024746 | 0.068379 |
| gene426 | gene426 | rpsR      | gi 57650036 ref NC_002951.2 :443565-443808 | q1 | q2 | OK | 650.221 | 149.441 | -2.12135     | 3.0029       | 0.0026742 | 0.071415 |
| gene431 | gene431 | SACOL0444 | gi 57650036 ref NC_002951.2 :447486-448059 | q1 | q2 | OK | 22.9387 | 1250.85 | 5.76898      | -6.92765     | 4.28E-12  | 2.58E-09 |
| gene433 | gene433 | SACOL0446 | gi 57650036 ref NC_002951.2 :448759-449011 | q1 | q2 | OK | 634.718 | 15736.1 | 4.63182      | -5.34645     | 8.97E-08  | 1.56E-05 |
| gene443 | gene443 | SACOL0456 | gi 57650036 ref NC_002951.2 :458667-459330 | q1 | q2 | OK | 62.4563 | 185.204 | 1.5682       | -2.05305     | 0.0400675 | 0.389743 |
| gene444 | gene444 | SACOL0457 | gi 57650036 ref NC_002951.2 :459472-459880 | q1 | q2 | OK | 1054.72 | 4023.41 | 1.93156      | -2.06395     | 0.0390226 | 0.38357  |
| gene452 | gene452 | SACOL0465 | gi 57650036 ref NC_002951.2 :467985-468138 | q1 | q2 | OK | 46.5922 | 0       | 1.79769e+308 | 1.79769e+308 | 0.0438457 | 0.40838  |
| gene455 | gene455 | SACOL0468 | gi 57650036 ref NC_002951.2 :470356-471037 | q1 | q2 | OK | 13.6883 | 41.0666 | 1.58502      | -2.29676     | 0.0216327 | 0.276112 |
| gene488 | gene488 | SACOL0503 | gi 57650036 ref NC_002951.2 :502701-504742 | q1 | q2 | OK | 75.9809 | 11.8089 | -2.68576     | 2.97177      | 0.0029609 | 0.076923 |
| gene499 | gene499 | gltB      | gi 57650036 ref NC_002951.2 :513657-518157 | q1 | q2 | OK | 3.98082 | 14.2718 | 1.84203      | -2.5033      | 0.0123041 | 0.189861 |
| gene500 | gene500 | gltD      | gi 57650036 ref NC_002951.2 :518174-519638 | q1 | q2 | OK | 3.7261  | 12.3834 | 1.73267      | -2.50914     | 0.0121025 | 0.187953 |
| gene504 | gene504 | SACOL0518 | gi 57650036 ref NC_002951.2 :523625-524354 | q1 | q2 | OK | 21.5343 | 8.34286 | -1.36802     | 1.98885      | 0.0467173 | 0.42474  |
| gene511 | gene511 | rrfA      | gi 57650036 ref NC_002951.2 :534059-534174 | q1 | q2 | OK | 373015  | 80681.2 | -2.20893     | 2.7923       | 0.0052334 | 0.110421 |
| gene529 | gene529 | SACOL0540 | gi 57650036 ref NC_002951.2 :548803-549184 | q1 | q2 | OK | 84.6528 | 998.901 | 3.56071      | -4.50795     | 6.55E-06  | 0.000592 |
| gene530 | gene530 | spoVG     | gi 57650036 ref NC_002951.2 :549255-549558 | q1 | q2 | OK | 340.373 | 3141.43 | 3.20624      | -3.81225     | 0.0001377 | 0.007608 |
| gene534 | gene534 | rplY      | gi 57650036 ref NC_002951.2 :552515-553169 | q1 | q2 | OK | 937.4   | 190.828 | -2.29639     | 2.59817      | 0.0093723 | 0.161634 |
| gene552 | gene552 | rrfG      | gi 57650036 ref NC_002951.2 :572451-572566 | q1 | q2 | OK | 409779  | 113856  | -1.84764     | 2.28585      | 0.0222628 | 0.282659 |
| gene562 | gene562 | SACOL0564 | gi 57650036 ref NC_002951.2 :584964-585852 | q1 | q2 | OK | 167.145 | 56.5892 | -1.5625      | 1.97813      | 0.0479136 | 0.430141 |
| gene563 | gene563 | SACOL0565 | gi 57650036 ref NC_002951.2 :585855-586416 | q1 | q2 | OK | 222.611 | 73.0966 | -1.60665     | 2.12561      | 0.033536  | 0.350737 |
| gene581 | gene581 | rplA      | gi 57650036 ref NC_002951.2 :604114-604807 | q1 | q2 | OK | 710.546 | 154.665 | -2.19978     | 2.52888      | 0.0114428 | 0.182325 |
| gene582 | gene582 | rplJ      | gi 57650036 ref NC_002951.2 :605078-605579 | q1 | q2 | OK | 209.984 | 34.8505 | -2.59102     | 3.55577      | 0.0003769 | 0.016139 |
| gene583 | gene583 | rplL      | gi 57650036 ref NC_002951.2 :605621-605990 | q1 | q2 | OK | 742.908 | 90.9789 | -3.02958     | 3.95708      | 7.59E-05  | 0.004501 |
| gene587 | gene587 | SACOL0590 | gi 57650036 ref NC_002951.2 :614435-614690 | q1 | q2 | OK | 212.754 | 26.2795 | -3.01718     | 4.18359      | 2.87E-05  | 0.001959 |



|         |         |           |                                            |    |    |    |         |         |              |              |           |          |
|---------|---------|-----------|--------------------------------------------|----|----|----|---------|---------|--------------|--------------|-----------|----------|
| gene588 | gene588 | rpsL      | gi 57650036 ref NC_002951.2 :614787-615201 | q1 | q2 | OK | 862.506 | 280.331 | -1.6214      | 1.96201      | 0.0497617 | 0.438109 |
| gene589 | gene589 | rpsG      | gi 57650036 ref NC_002951.2 :615266-615737 | q1 | q2 | OK | 1143.11 | 261.515 | -2.12799     | 2.47745      | 0.0132326 | 0.19827  |
| gene590 | gene590 | fusA      | gi 57650036 ref NC_002951.2 :615859-617941 | q1 | q2 | OK | 674.365 | 164.957 | -2.03144     | 2.13117      | 0.0330748 | 0.34869  |
| gene594 | gene594 | SACOL0597 | gi 57650036 ref NC_002951.2 :622422-623301 | q1 | q2 | OK | 179.082 | 1032.61 | 2.5276       | -2.7731      | 0.0055525 | 0.115648 |
| gene606 | gene606 | sdrD      | gi 57650036 ref NC_002951.2 :635788-639934 | q1 | q2 | OK | 70.948  | 17.7861 | -1.99601     | 2.32715      | 0.0199573 | 0.260836 |
| gene614 | gene614 | SACOL0617 | gi 57650036 ref NC_002951.2 :650357-650990 | q1 | q2 | OK | 48.4518 | 197.552 | 2.02761      | -2.68605     | 0.0072302 | 0.137697 |
| gene624 | gene624 | ung       | gi 57650036 ref NC_002951.2 :659763-660420 | q1 | q2 | OK | 64.941  | 19.561  | -1.73115     | 2.47633      | 0.0132741 | 0.198481 |
| gene626 | gene626 | SACOL0629 | gi 57650036 ref NC_002951.2 :660933-661302 | q1 | q2 | OK | 59.3551 | 15.4858 | -1.93843     | 2.7584       | 0.0058085 | 0.118414 |
| gene627 | gene627 | SACOL0630 | gi 57650036 ref NC_002951.2 :661422-662907 | q1 | q2 | OK | 24.8599 | 409.605 | 4.04234      | -4.72648     | 2.28E-06  | 0.000226 |
| gene641 | gene641 | SACOL0644 | gi 57650036 ref NC_002951.2 :675513-676140 | q1 | q2 | OK | 1.1604  | 4.65289 | 2.0035       | -2.24053     | 0.0250563 | 0.300717 |
| gene668 | gene668 | SACOL0671 | gi 57650036 ref NC_002951.2 :698936-699725 | q1 | q2 | OK | 76.5804 | 664.518 | 3.11726      | -3.64157     | 0.000271  | 0.012571 |
| gene669 | gene669 | sarA      | gi 57650036 ref NC_002951.2 :699975-700350 | q1 | q2 | OK | 886.334 | 5032.8  | 2.50544      | -2.72182     | 0.0064923 | 0.126644 |
| gene674 | gene674 | SACOL0678 | gi 57650036 ref NC_002951.2 :703024-703585 | q1 | q2 | OK | 7.62842 | 66.0622 | 3.11437      | -4.34484     | 1.39E-05  | 0.00104  |
| gene675 | gene675 | SACOL0679 | gi 57650036 ref NC_002951.2 :703603-708245 | q1 | q2 | OK | 5.87864 | 59.8261 | 3.34722      | -2.86468     | 0.0041743 | 0.094974 |
| gene678 | gene678 | SACOL0682 | gi 57650036 ref NC_002951.2 :703603-708245 | q1 | q2 | OK | 11.0264 | 65.9499 | 2.58041      | -1.96346     | 0.0495927 | 0.437686 |
| gene681 | gene681 | SACOL0686 | gi 57650036 ref NC_002951.2 :708245-709439 | q1 | q2 | OK | 17.895  | 67.1851 | 1.90859      | -2.04445     | 0.0409096 | 0.394682 |
| gene706 | gene706 | SACOL0711 | gi 57650036 ref NC_002951.2 :735702-736770 | q1 | q2 | OK | 264.959 | 75.0762 | -1.81934     | 2.15527      | 0.0311403 | 0.337139 |
| gene730 | gene730 | SACOL0738 | gi 57650036 ref NC_002951.2 :760445-760745 | q1 | q2 | OK | 84.6887 | 222.143 | 1.39125      | -2.00506     | 0.0449571 | 0.415523 |
| gene732 | gene732 | SACOL0740 | gi 57650036 ref NC_002951.2 :761462-762029 | q1 | q2 | OK | 14.1393 | 38.8079 | 1.45664      | -2.11615     | 0.0343324 | 0.354442 |
| gene733 | gene733 | SACOL0741 | gi 57650036 ref NC_002951.2 :762030-762489 | q1 | q2 | OK | 8.66501 | 23.8622 | 1.46145      | -2.04007     | 0.0413433 | 0.396038 |
| gene734 | gene734 | SACOL0742 | gi 57650036 ref NC_002951.2 :762491-763175 | q1 | q2 | OK | 39.1451 | 170.086 | 2.11937      | -2.82164     | 0.0047779 | 0.102605 |
| gene754 | gene754 | SACOL0763 | gi 57650036 ref NC_002951.2 :785704-786544 | q1 | q2 | OK | 22.212  | 99.4452 | 2.16257      | -2.94364     | 0.0032437 | 0.08208  |
| gene755 | gene755 | SACOL0764 | gi 57650036 ref NC_002951.2 :786675-787659 | q1 | q2 | OK | 45.0892 | 172.447 | 1.9353       | -2.43247     | 0.0149964 | 0.21364  |
| gene773 | gene773 | hisC      | gi 57650036 ref NC_002951.2 :807522-808581 | q1 | q2 | OK | 10.0851 | 47.8801 | 2.24721      | -3.14709     | 0.001649  | 0.050143 |
| gene775 | gene775 | SACOL0786 | gi 57650036 ref NC_002951.2 :809586-809748 | q1 | q2 | OK | 0       | 560.512 | 1.79769e+308 | 1.79769e+308 | 0.0014505 | 0.045442 |
| gene776 | gene776 | SACOL0787 | gi 57650036 ref NC_002951.2 :810153-811071 | q1 | q2 | OK | 31.4284 | 320.723 | 3.35119      | -4.14308     | 3.43E-05  | 0.002254 |
| gene778 | gene778 | SACOL0789 | gi 57650036 ref NC_002951.2 :813186-813687 | q1 | q2 | OK | 37.0683 | 12.106  | -1.61447     | 2.33212      | 0.0196943 | 0.25867  |
| gene779 | gene779 | SACOL0790 | gi 57650036 ref NC_002951.2 :813706-814573 | q1 | q2 | OK | 28.3729 | 10.5832 | -1.42273     | 2.06931      | 0.0385168 | 0.382368 |
| gene793 | gene793 | SACOL0804 | gi 57650036 ref NC_002951.2 :826824-827145 | q1 | q2 | OK | 70.8922 | 232.721 | 1.7149       | -2.44657     | 0.0144224 | 0.207918 |
| gene820 | gene820 | SACOL0831 | gi 57650036 ref NC_002951.2 :856420-858324 | q1 | q2 | OK | 41.8131 | 256.844 | 2.61887      | -2.53076     | 0.0113815 | 0.182229 |
| gene821 | gene821 | SACOL0832 | gi 57650036 ref NC_002951.2 :858433-859378 | q1 | q2 | OK | 53.8533 | 225.301 | 2.06475      | -2.54553     | 0.0109111 | 0.176027 |
| gene824 | gene824 | SACOL0834 | gi 57650036 ref NC_002951.2 :860780-861683 | q1 | q2 | OK | 22.8216 | 112.016 | 2.29523      | -3.07401     | 0.002112  | 0.05994  |

|         |         |           |                                              |    |    |    |         |         |              |              |           |          |
|---------|---------|-----------|----------------------------------------------|----|----|----|---------|---------|--------------|--------------|-----------|----------|
| gene825 | gene825 | SACOL0835 | gi 57650036 ref NC_002951.2 :862386-863016   | q1 | q2 | OK | 45.2098 | 221.264 | 2.29106      | -3.0182      | 0.0025428 | 0.069181 |
| gene827 | gene827 | gapR      | gi 57650036 ref NC_002951.2 :863775-864789   | q1 | q2 | OK | 66.6208 | 359.669 | 2.43263      | -2.86586     | 0.0041588 | 0.094945 |
| gene828 | gene828 | gapA1     | gi 57650036 ref NC_002951.2 :864841-865852   | q1 | q2 | OK | 302.645 | 1562.03 | 2.36772      | -2.51447     | 0.0119213 | 0.186337 |
| gene829 | gene829 | pgk       | gi 57650036 ref NC_002951.2 :865990-867181   | q1 | q2 | OK | 68.7632 | 317.513 | 2.20711      | -2.56246     | 0.0103932 | 0.172118 |
| gene83  | gene83  | SACOL0086 | gi 57650036 ref NC_002951.2 :96318-97707     | q1 | q2 | OK | 3.2129  | 8.34409 | 1.37688      | -1.99163     | 0.0464112 | 0.423595 |
| gene830 | gene830 | tpiA      | gi 57650036 ref NC_002951.2 :867302-868064   | q1 | q2 | OK | 87.9204 | 403.604 | 2.19867      | -2.64        | 0.0082906 | 0.148512 |
| gene831 | gene831 | pgm       | gi 57650036 ref NC_002951.2 :868066-869584   | q1 | q2 | OK | 79.8196 | 292.043 | 1.87137      | -2.10235     | 0.0355228 | 0.360558 |
| gene846 | gene846 | clfA      | gi 57650036 ref NC_002951.2 :880642-883444   | q1 | q2 | OK | 93.3653 | 1037.04 | 3.47344      | -3.76697     | 0.0001652 | 0.008729 |
| gene853 | gene853 | SACOL0863 | gi 57650036 ref NC_002951.2 :889728-890013   | q1 | q2 | OK | 5.70951 | 31.1372 | 2.4472       | -2.78121     | 0.0054157 | 0.113604 |
| gene854 | gene854 | SACOL0864 | gi 57650036 ref NC_002951.2 :890100-890670   | q1 | q2 | OK | 6.5864  | 0.89518 | -2.87924     | 3.0234       | 0.0024995 | 0.06878  |
| gene857 | gene857 | SACOL0868 | gi 57650036 ref NC_002951.2 :891875-892112   | q1 | q2 | OK | 39.8813 | 528.328 | 3.72765      | -5.04833     | 4.46E-07  | 5.86E-05 |
| gene86  | gene86  | SACOL0089 | gi 57650036 ref NC_002951.2 :100186-101962   | q1 | q2 | OK | 4.86145 | 22.4486 | 2.20717      | -3.11626     | 0.0018316 | 0.054042 |
| gene860 | gene860 | SACOL0871 | gi 57650036 ref NC_002951.2 :893762-894257   | q1 | q2 | OK | 14.2047 | 96.1957 | 2.7596       | -3.89027     | 0.0001001 | 0.005706 |
| gene861 | gene861 | SACOL0872 | gi 57650036 ref NC_002951.2 :894655-895078   | q1 | q2 | OK | 15.988  | 189.707 | 3.56871      | -4.88807     | 1.02E-06  | 0.000117 |
| gene867 | gene867 | SACOL0879 | gi 57650036 ref NC_002951.2 :898250-899129   | q1 | q2 | OK | 65.0803 | 18.3554 | -1.82602     | 2.54656      | 0.010879  | 0.176027 |
| gene874 | gene874 | sek       | gi 57650036 ref NC_002951.2 :904799-905528   | q1 | q2 | OK | 18.061  | 6.46572 | -1.482       | 2.13611      | 0.0326704 | 0.346679 |
| gene89  | gene89  | SACOL0092 | gi 57650036 ref NC_002951.2 :104707-105181   | q1 | q2 | OK | 6.05831 | 53.1833 | 3.13399      | -4.26126     | 2.03E-05  | 0.001428 |
| gene900 | gene900 | SACOL0912 | gi 57650036 ref NC_002951.2 :919636-919831   | q1 | q2 | OK | 2853.72 | 58362.5 | 4.35413      | -4.94854     | 7.48E-07  | 9.49E-05 |
| gene908 | gene908 | SACOL0920 | gi 57650036 ref NC_002951.2 :927096-927411   | q1 | q2 | OK | 2.78684 | 0       | 1.79769e+308 | 1.79769e+308 | 0.0438457 | 0.40838  |
| gene909 | gene909 | SACOL0921 | gi 57650036 ref NC_002951.2 :927775-928816   | q1 | q2 | OK | 13.1703 | 62.1485 | 2.23843      | -3.09153     | 0.0019913 | 0.057644 |
| gene91  | gene91  | spa       | gi 57650036 ref NC_002951.2 :107363-108890   | q1 | q2 | OK | 106.424 | 9.22015 | -3.52889     | 4.55517      | 5.23E-06  | 0.00048  |
| gene910 | gene910 | SACOL0922 | gi 57650036 ref NC_002951.2 :928829-929897   | q1 | q2 | OK | 9.28466 | 34.1717 | 1.87988      | -2.68097     | 0.0073408 | 0.137988 |
| gene93  | gene93  | sirC      | gi 57650036 ref NC_002951.2 :110431-112422   | q1 | q2 | OK | 8.30008 | 107.927 | 3.70079      | -4.84367     | 1.27E-06  | 0.000138 |
| gene973 | gene973 | fabH      | gi 57650036 ref NC_002951.2 :994755-995697   | q1 | q2 | OK | 82.0133 | 13.5252 | -2.6002      | 3.56697      | 0.0003611 | 0.015577 |
| gene989 | gene989 | SACOL1003 | gi 57650036 ref NC_002951.2 :1011207-1011927 | q1 | q2 | OK | 28.8795 | 179.086 | 2.63254      | -3.48904     | 0.0004848 | 0.019709 |

**Supplementary Table S11. Differentially expressed genes in MVR compared with MR150, related to Supplementary Figure S8**

| test_id  | gene_id  | gene      | locus                                        | MVR | MR150 | status | FPKM(MV<br>R) | FPKM(M<br>R150) | log2(fold_<br>change) | test_stat        | p_value   | q_value   |
|----------|----------|-----------|----------------------------------------------|-----|-------|--------|---------------|-----------------|-----------------------|------------------|-----------|-----------|
| gene1066 | gene1066 | purN      | gi 57650036 ref NC_002951.2 :1090827-1091394 | q1  | q2    | OK     | 333.041       | 100.915         | -1.72255              | 2.18126          | 0.029164  | 0.324708  |
| gene1067 | gene1067 | purH      | gi 57650036 ref NC_002951.2 :1091408-1092887 | q1  | q2    | OK     | 280.592       | 83.5847         | -1.74716              | 1.96766          | 0.049107  | 0.435378  |
| gene1068 | gene1068 | purD      | gi 57650036 ref NC_002951.2 :1092908-1094156 | q1  | q2    | OK     | 480.77        | 123.484         | -1.96103              | 2.15723          | 0.0309881 | 0.336223  |
| gene1154 | gene1154 | SACOL1170 | gi 57650036 ref NC_002951.2 :1178160-1178406 | q1  | q2    | OK     | 17.2158       | 0               | 1.79769e+3<br>08      | 1.79769e+3<br>08 | 0.008676  | 0.152769  |
| gene1347 | gene1347 | guaC      | gi 57650036 ref NC_002951.2 :1376436-1377515 | q1  | q2    | OK     | 20.8626       | 6.69204         | -1.6404               | 2.36693          | 0.0179363 | 0.242627  |
| gene1442 | gene1442 | SACOL1469 | gi 57650036 ref NC_002951.2 :1478930-1479062 | q1  | q2    | OK     | 217.965       | 0               | 1.79769e+3<br>08      | 1.79769e+3<br>08 | 0.02679   | 0.309278  |
| gene1540 | gene1540 | SACOL1574 | gi 57650036 ref NC_002951.2 :1609249-1609591 | q1  | q2    | OK     | 0             | 5.24298         | 1.79769e+3<br>08      | 1.79769e+3<br>08 | 0.0114882 | 0.182325  |
| gene1545 | gene1545 | SACOL1579 | gi 57650036 ref NC_002951.2 :1614543-1617039 | q1  | q2    | OK     | 3.19232       | 1.06745         | -1.58044              | 2.23713          | 0.0252778 | 0.302373  |
| gene1547 | gene1547 | SACOL1581 | gi 57650036 ref NC_002951.2 :1617468-1617729 | q1  | q2    | OK     | 20.8076       | 2.01969         | -3.36491              | 2.59539          | 0.0094482 | 0.161634  |
| gene17   | gene17   | purA      | gi 57650036 ref NC_002951.2 :22464-23748     | q1  | q2    | OK     | 32.5521       | 10.3137         | -1.65819              | 2.34309          | 0.0191248 | 0.252566  |
| gene1883 | gene1883 | SACOL1918 | gi 57650036 ref NC_002951.2 :1972990-1974310 | q1  | q2    | OK     | 1.01386       | 0.13674         | -2.89032              | 2.21372          | 0.0268481 | 0.309278  |
| gene1998 | gene1998 | SACOL2006 | gi 57650036 ref NC_002951.2 :2065993-2067049 | q1  | q2    | OK     | 1.96805       | 0.3578          | -2.45956              | 2.48541          | 0.0129401 | 0.195099  |
| gene2000 | gene2000 | SACOL2009 | gi 57650036 ref NC_002951.2 :2069079-2069925 | q1  | q2    | OK     | 1.88015       | 0               | 1.79769e+3<br>08      | 1.79769e+3<br>08 | 0.0063651 | 0.125174  |
| gene2070 | gene2070 | SACOL2077 | gi 57650036 ref NC_002951.2 :2143971-2144181 | q1  | q2    | OK     | 9.23386       | 0               | 1.79769e+3<br>08      | 1.79769e+3<br>08 | 0.0438457 | 0.40838   |
| gene219  | gene219  | SACOL0228 | gi 57650036 ref NC_002951.2 :266687-269236   | q1  | q2    | OK     | 1.90491       | 0.32298         | -2.5602               | 2.8262           | 0.0047103 | 0.101483  |
| gene2256 | gene2256 | sarV      | gi 57650036 ref NC_002951.2 :2324349-2324700 | q1  | q2    | OK     | 4.77187       | 15.867          | 1.73341               | -2.06407         | 0.0390113 | 0.38357   |
| gene2395 | gene2395 | nirR      | gi 57650036 ref NC_002951.2 :2460980-2461712 | q1  | q2    | OK     | 4.48861       | 0.86332         | -2.3783               | 2.66757          | 0.0076402 | 0.141411  |
| gene241  | gene241  | SACOL0250 | gi 57650036 ref NC_002951.2 :290131-290923   | q1  | q2    | OK     | 1.95587       | 0.25863         | -2.91888              | 2.23559          | 0.0253787 | 0.303073  |
| gene2425 | gene2425 | SACOL2430 | gi 57650036 ref NC_002951.2 :2487795-2489529 | q1  | q2    | OK     | 2.01415       | 0.29954         | -2.74934              | 3.11605          | 0.0018329 | 0.0540416 |
| gene2551 | gene2551 | feoB      | gi 57650036 ref NC_002951.2 :2624246-2626241 | q1  | q2    | OK     | 3.00539       | 1.02399         | -1.55335              | 2.14534          | 0.0319253 | 0.343304  |
| gene2662 | gene2662 | SACOL2680 | gi 57650036 ref NC_002951.2 :2756807-2757110 | q1  | q2    | OK     | 3.67309       | 0               | 1.79769e+3<br>08      | 1.79769e+3<br>08 | 0.0325745 | 0.346169  |
| gene2690 | gene2690 | SACOL2708 | gi 57650036 ref NC_002951.2 :2779275-2781818 | q1  | q2    | OK     | 2.04255       | 0.40493         | -2.33462              | 2.1972           | 0.0280065 | 0.316692  |
| gene2716 | gene2716 | SACOL2734 | gi 57650036 ref NC_002951.2 :2802753-2803107 | q1  | q2    | OK     | 4.25552       | 0               | 1.79769e+3<br>08      | 1.79769e+3<br>08 | 0.0166856 | 0.231165  |

|         |         |           |                                              |    |    |            |          |         |          |         |           |          |
|---------|---------|-----------|----------------------------------------------|----|----|------------|----------|---------|----------|---------|-----------|----------|
| gene358 | gene358 | SACOL0370 | gi 57650036 ref NC_002951.2 :377929-379093   | q1 | q2 | OK         | 5.91036  | 2.22408 | -1.41004 | 1.97146 | 0.048671  | 0.43325  |
| gene363 | gene363 | SACOL0375 | gi 57650036 ref NC_002951.2 :380612-381254   | q1 | q2 | OK         | 2.65719  | 0.34632 | -2.93973 | 2.25156 | 0.0243501 | 0.296308 |
| gene371 | gene371 | SACOL0383 | gi 57650036 ref NC_002951.2 :391344-395267   | q1 | q2 | OK         | 1.69885  | 0.35808 | -2.24619 | 2.31429 | 0.0206516 | 0.267842 |
| gene377 | gene377 | SACOL0389 | gi 57650036 ref NC_002951.2 :396061-397516   | q1 | q2 | OK         | 1.56785  | 0.48815 | -1.68338 | 1.96658 | 0.0492322 | 0.435566 |
| gene459 | gene459 | SACOL0472 | gi 57650036 ref NC_002951.2 :473731-474658   | q1 | q2 | OK         | 1.6636   | 0       | -        | -       | 0.0063651 | 0.125174 |
| gene477 | gene477 | SACOL0490 | gi 57650036 ref NC_002951.2 :490668-490929   | q1 | q2 | OK         | 18.9983  | 4.03937 | -2.23367 | 2.22217 | 0.0262716 | 0.30765  |
| gene478 | gene478 | SACOL0491 | gi 57650036 ref NC_002951.2 :491047-492250   | q1 | q2 | OK         | 3.5842   | 1.06882 | -1.74563 | 2.26105 | 0.0237559 | 0.292955 |
| gene486 | gene486 | SACOL0501 | gi 57650036 ref NC_002951.2 :501147-502485   | q1 | q2 | OK         | 2.67746  | 0.67291 | -1.99239 | 2.45469 | 0.0141008 | 0.204943 |
| gene552 | gene552 | rrfG      | gi 57650036 ref NC_002951.2 :572451-572566   | q1 | q2 | OK         | 409779   | 134529  | -1.60693 | 1.99159 | 0.0464158 | 0.423595 |
| gene557 | gene557 | rrfB      | gi 57650036 ref NC_002951.2 :577661-577776   | q1 | q2 | OK         | 546950   | 169070  | -1.69379 | 2.04197 | 0.0411549 | 0.395011 |
| gene728 | gene728 | SACOL0736 | gi 57650036 ref NC_002951.2 :759402-759846   | q1 | q2 | OK         | 3.16779  | 0       | -        | -       | 0.0129732 | 0.195191 |
| gene775 | gene775 | SACOL0786 | gi 57650036 ref NC_002951.2 :809586-809748   | q1 | q2 | OK         | 0        | 75.521  | -        | -       | 0.0114882 | 0.182325 |
| gene844 | gene844 | SACOL0854 | gi 57650036 ref NC_002951.2 :879189-879711   | q1 | q2 | OK         | 1.95912  | 0       | -        | -       | 0.0166856 | 0.231165 |
| gene935 | gene935 | SACOL0948 | gi 57650036 ref NC_002951.2 :950400-951555   | q1 | q2 | OK         | 1.69602  | 0.48108 | -1.81781 | 2.00177 | 0.0453093 | 0.41665  |
| gene96  | gene96  | SACOL0100 | gi 57650036 ref NC_002951.2 :113693-114641   | q1 | q2 | NOTES<br>T | 0.726916 | 0       | -        | -       | 0.019226  | 1        |
| gene990 | gene990 | SACOL1004 | gi 57650036 ref NC_002951.2 :1012047-1013034 | q1 | q2 | NOTES<br>T | 0.919699 | 0       | -        | -       | 0.0129732 | 1        |

**Supplementary Table S12. COG functional classifications for Figure 4**

| COG class | Function description                                          | The number of diff_exp genes |                |                |                |                 |                |               |                |
|-----------|---------------------------------------------------------------|------------------------------|----------------|----------------|----------------|-----------------|----------------|---------------|----------------|
|           |                                                               | MR100 vs M18C06              |                | MU30 vs M18C06 |                | MR150 vs M36C05 |                | MVR vs M36C05 |                |
|           |                                                               | up-regulated                 | down-regulated | up-regulated   | down-regulated | up-regulated    | down-regulated | up-regulated  | down-regulated |
| C         | Energy production and conversion                              | 11                           | 0              | 6              | 3              | 3               | 8              | 2             | 5              |
| D         | Cell cycle control, cell division, chromosome partitioning    | 1                            | 1              | 0              | 0              | 0               | 1              | 1             | 1              |
| E         | Amino acid transport and metabolism                           | 8                            | 1              | 5              | 23             | 16              | 21             | 14            | 16             |
| F         | Nucleotide transport and metabolism                           | 9                            | 0              | 5              | 0              | 12              | 1              | 18            | 2              |
| G         | Carbohydrate transport and metabolism                         | 5                            | 3              | 2              | 6              | 4               | 19             | 5             | 16             |
| H         | Coenzyme transport and metabolism                             | 6                            | 0              | 0              | 2              | 9               | 3              | 7             | 1              |
| I         | Lipid transport and metabolism                                | 7                            | 1              | 3              | 1              | 6               | 6              | 5             | 5              |
| J         | Translation, ribosomal structure and biogenesis               | 52                           | 1              | 28             | 0              | 46              | 2              | 36            | 2              |
| K         | Transcription                                                 | 19                           | 3              | 4              | 1              | 13              | 15             | 12            | 9              |
| L         | Replication, recombination and repair                         | 6                            | 2              | 3              | 1              | 7               | 2              | 6             | 1              |
| M         | Cell wall/membrane/envelope biogenesis                        | 3                            | 4              | 2              | 0              | 6               | 21             | 6             | 13             |
| N         | Cell motility                                                 | 0                            | 0              | 0              | 0              | 0               | 1              | 0             | 1              |
| O         | Posttranslational modification, protein turnover, chaperones  | 2                            | 0              | 2              | 0              | 6               | 10             | 1             | 6              |
| P         | Inorganic ion transport and metabolism                        | 7                            | 0              | 2              | 10             | 5               | 10             | 5             | 11             |
| Q         | Secondary metabolites biosynthesis, transport and catabolism  | 1                            | 0              | 1              | 2              | 1               | 5              | 1             | 4              |
| R         | General function prediction only                              | 10                           | 3              | 3              | 12             | 18              | 32             | 16            | 24             |
| S         | Function unknown                                              | 14                           | 6              | 6              | 6              | 16              | 31             | 11            | 21             |
| T         | Signal transduction mechanisms                                | 4                            | 0              | 1              | 0              | 2               | 6              | 1             | 6              |
| U         | Intracellular trafficking, secretion, and vesicular transport | 2                            | 0              | 2              | 0              | 2               | 1              | 1             | 1              |
| V         | Defense mechanisms                                            | 0                            | 0              | 0              | 3              | 3               | 5              | 3             | 3              |

**Supplementary Table S13. Relative *in vitro* ursolic acid and resveratrol inhibiting MRSA biofilm formation genes, related to Figure 5a and 5b**

| locus No. | gene name | product                                                                                   | fold induction |                |
|-----------|-----------|-------------------------------------------------------------------------------------------|----------------|----------------|
|           |           |                                                                                           | MR100 vs M18C6 | MU30 vs M18C06 |
| gene1001  | fabI      | enoyl-ACP reductase                                                                       | 2.86           | 6.5            |
| gene1066  | purN      | phosphoribosylglycinamide formyltransferase                                               | 5.5            | 6.82           |
| gene1067  | purH      | bifunctional phosphoribosylaminoimidazolecarboxamide formyltransferase/IMP cyclohydrolase | 4.33           | -              |
| gene1068  | purD      | phosphoribosylamine--glycine ligase                                                       | 5.65           | 6.53           |
| gene1123  | isdB      | LPXTG cell wall surface anchor protein                                                    | -              | 0.089          |
| gene1129  | srtB      | sortase                                                                                   | -              | 0.038          |
| gene130   | cap5A     | capsular polysaccharide biosynthesis protein Cap5A                                        | 0.137          | -              |
| gene131   | cap5B     | capsular polysaccharide biosynthesis protein Cap5B                                        | 0.144          | -              |
| gene132   | cap5C     | capsular polysaccharide biosynthesis protein Cap5C                                        | 0.219          | -              |
| gene135   | cap5F     | capsular polysaccharide biosynthesis protein Cap5F                                        | 0.303          | -              |
| gene136   | cap5G     | UDP-N-acetylglucosamine 2-epimerase Cap5G                                                 | 0.348          | -              |
| gene1444  | ebh       | cell wall associated fibronectin-binding protein                                          | -              | 0.186          |
| gene1623  | SACOL1657 | enterotoxin type A                                                                        | -              | 0.028          |
| gene1658  | yajC      | preprotein translocase, YajC subunit                                                      | 2.3            | 10.6           |
| gene1720  | ald2      | alanine dehydrogenase                                                                     | 3.79           | 5.27           |
| gene1964  | sspB2     | cysteine protease precursor SspB                                                          | -              | 0.037          |
| gene2013  | hld       | delta-hemolysin                                                                           | 20.18          | 53.58          |
| gene2050  | rsbU      | sigma factor B regulator protein                                                          | 2.23           | -              |
| gene2060  | kdpB      | potassium-transporting ATPase subunit B                                                   | -              | 0.109          |
| gene2061  | kdpA      | potassium-transporting ATPase subunit A                                                   | -              | 0.06           |
| gene2109  | fbaA      | fructose-bisphosphate aldolase                                                            | 3.89           | -              |
| gene2137  | glmS      | glucosamine--fructose-6-phosphate aminotransferase                                        | -              | 7.4            |
| gene2571  | isaA      | immunodominant antigen A                                                                  | -              | 13.37          |
| gene2638  | arcD      | arginine/ornithine antiporter                                                             | -              | 0.049          |
| gene2639  | arcB2     | ornithine carbamoyltransferase                                                            | -              | 0.039          |
| gene2640  | arcA      | arginine deiminase                                                                        | -              | 0.02           |
| gene2642  | aur       |                                                                                           | -              | 0.019          |
| gene605   | sdrC      | sdrC protein                                                                              | -              | 0.128          |

|         |     |                                              |       |       |
|---------|-----|----------------------------------------------|-------|-------|
| gene75  | plc | 1-phosphatidylinositol phosphodiesterase     | -     | 0.059 |
| gene875 | sei | enterotoxin type I                           | 0.459 | -     |
| gene91  | spa | immunoglobulin G binding protein A precursor | 12.89 | -     |

---

**Supplementary Table S14. Relative in vitro resveratrol and the combination with vancomycin removing established MRSA biofilm genes, related to Figure 5c**

| locus No. | gene name | product                                                          | fold induction  |               |           |
|-----------|-----------|------------------------------------------------------------------|-----------------|---------------|-----------|
|           |           |                                                                  | MR150 vs M36C05 | MVR vs M36C05 | MVR vs MV |
| gene2017  | agrA      | accessory gene regulator protein A                               | 0.255           | 0.209         | -         |
| gene2014  | agrB      | ccessory gene regulator protein B                                | 0.135           | 0.123         | -         |
| gene2016  | argC2     | accessory gene regulator protein C                               | 0.169           | 0.142         | -         |
| gene2640  | arcA      | arginine deiminase                                               | 3.068           | 3.281         | -         |
| gene130   | cap5A     | capsular polysaccharide biosynthesis protein Cap5A               | 0.01            | 0.014         | -         |
| gene131   | cap5B     | capsular polysaccharide biosynthesis protein Cap5B               | 0.008           | 0.009         | -         |
| gene132   | cap5C     | capsular polysaccharide biosynthesis protein Cap5C               | 0.011           | 0.022         | -         |
| gene133   | cap5D     | capsular polysaccharide biosynthesis protein Cap5D               | 0.019           | 0.02          | -         |
| gene134   | cap5E     | capsular polysaccharide biosynthesis protein Cap5E               | 0.025           | 0.038         | -         |
| gene135   | cap5F     | capsular polysaccharide biosynthesis protein Cap5F               | 0.032           | 0.06          | -         |
| gene136   | cap5G     | UDP-N-acetylglucosamine 2-epimerase Cap5G                        | 0.056           | 0.078         | -         |
| gene141   | cap5L     | capsular polysaccharide biosynthesis protein Cap5L               | 0.079           | 0.231         | -         |
| gene142   | cap5M     | capsular polysaccharide biosynthesis galactosyltransferase Cap5M | 0.158           | -             | -         |
| gene143   | cap5N     | capsular polysaccharide biosynthesis protein Cap5N               | 0.225           | -             | -         |
| gene144   | cap5O     | capsular polysaccharide biosynthesis protein Cap5O               | 0.278           | 0.357         | -         |
| gene1199  | carA      | carbamoyl phosphate synthase small subunit                       | 12.14           | 12.18         | -         |
| gene1200  | carB      | carbamoyl phosphate synthase large subunit                       | 12.65           | 13.61         | -         |
| gene846   | clfA      | clumping factor A                                                | 0.093           | 0.09          | -         |
| gene965   | clpB      | ATP-dependent Clp protease, ATP-binding subunit ClpB             | 4.95            | -             | -         |
| gene1152  | efb       | fibrinogen-binding protein                                       | 3.13            | 4.27          | -         |
| gene828   | gapA1     | glyceraldehyde 3-phosphate dehydrogenase                         | 0.158           | 0.194         | -         |
| gene827   | gapR      | glycolytic operon regulator                                      | 0.197           | 0.185         | -         |
| gene2013  | hld       | delta-hemolysin                                                  | 0.26            | 0.078         | -         |
| gene2325  | hutG      | formimidoylglutamase                                             | 0.081           | 0.085         | -         |
| gene7     | hutH      | histidine ammonia-lyase                                          | 4.01            | -             | -         |
| gene2195  | hysA      | hyaluronate lyase                                                | 0.182           | -             | -         |
| gene2571  | isaA      | immunodominant antigen A                                         | 7.32            | 7.36          | -         |
| gene1180  | mraY      | phospho-N-acetylmuramoyl-pentapeptide-transferase                | 6.25            | 6.66          | -         |



|          |       |                                                                                           |       |       |      |
|----------|-------|-------------------------------------------------------------------------------------------|-------|-------|------|
| gene1181 | murD  | UDP-N-acetylmuramoyl-L-alanyl-D-glutamate synthetase                                      | 5.34  | 5.87  | -    |
| gene199  | pflA  | pyruvate formate-lyase-activating enzyme                                                  | 0.257 | 0.32  | -    |
| gene198  | pflB  | formate acetyltransferase                                                                 | 0.121 | 0.221 | -    |
| gene829  | pgk   | phosphoglycerate kinase                                                                   | 0.183 | 0.217 | -    |
| gene17   | purA  | adenylosuccinate synthetase                                                               | -     | 6.28  | 3.16 |
| gene1068 | purD  | phosphoribosylamine--glycine ligase                                                       | -     | 7.69  | 3.89 |
| gene1067 | purH  | bifunctional phosphoribosylaminoimidazolecarboxamide formyltransferase/IMP cyclohydrolase | -     | 5.81  | 3.36 |
| gene1066 | purN  | phosphoribosylglycinamide formyltransferase                                               | -     | 5.65  | 3.3  |
| gene1197 | pyrB  | aspartate carbamoyltransferase catalytic subunit                                          | 11.68 | 10.72 | -    |
| gene1198 | pyrC  | dihydroorotase                                                                            | 8.21  | 8.65  | -    |
| gene1202 | pyrE  | orotate phosphoribosyltransferase                                                         | 19.01 | 16.75 | -    |
| gene1201 | pyrF  | orotidine 5\'-phosphate decarboxylase                                                     | 9.65  | 9.84  | -    |
| gene2111 | pyrG  | CTP synthetase                                                                            | 4.42  | 4.19  | -    |
| gene1195 | pyrR  | bifunctional pyrimidine regulatory protein PyrR uracil phosphoribosyltransferase          | 3.44  | 2.82  | -    |
| gene669  | sarA  | accessory regulator A                                                                     | 0.109 | 0.176 | -    |
| gene606  | sdrD  | sdrD protein                                                                              | 4.64  | 3.99  | -    |
| gene874  | sek   | enterotoxin                                                                               | 3.94  | 2.79  | -    |
| gene91   | spa   | immunoglobulin G binding protein A precursor                                              | 13.37 | 11.54 | -    |
| gene530  | spoVG | regulatory protein SpoVG                                                                  | 0.114 | 0.108 | -    |

---

**Supplementary Table S15. Differentially expressed genes in MV compared with M36**

| test_id  | gene_id  | gene      | locus                                        | MV | M36 | status | FPKM(MV) | FPKM(M36) | log2(fold change) | test_stat    | p_value   | q_value   |
|----------|----------|-----------|----------------------------------------------|----|-----|--------|----------|-----------|-------------------|--------------|-----------|-----------|
| gene1030 | gene1030 | SACOL1044 | gi 57650036 ref NC_002951.2 :1052385-1052742 | q1 | q2  | OK     | 26.3732  | 58.5592   | 1.15082           | -2.0633      | 0.0390843 | 0.997376  |
| gene1056 | gene1056 | SACOL1071 | gi 57650036 ref NC_002951.2 :1080737-1081055 | q1 | q2  | OK     | 295.386  | 131.263   | -1.17014          | 2.47397      | 0.013362  | 0.564486  |
| gene1059 | gene1059 | purK      | gi 57650036 ref NC_002951.2 :1082921-1084515 | q1 | q2  | OK     | 55.578   | 17.4756   | -1.66918          | 3.22184      | 0.0012737 | 0.10954   |
| gene1060 | gene1060 | purC      | gi 57650036 ref NC_002951.2 :1084518-1085486 | q1 | q2  | OK     | 47.1285  | 14.2345   | -1.7272           | 3.04567      | 0.0023216 | 0.174703  |
| gene1061 | gene1061 | purS      | gi 57650036 ref NC_002951.2 :1084518-1085486 | q1 | q2  | OK     | 129.819  | 35.4538   | -1.87249          | 1.98063      | 0.0476327 | 0.997376  |
| gene1063 | gene1063 | purL      | gi 57650036 ref NC_002951.2 :1085487-1090825 | q1 | q2  | OK     | 94.8901  | 27.8427   | -1.76896          | 2.73083      | 0.0063175 | 0.316927  |
| gene1064 | gene1064 | purF      | gi 57650036 ref NC_002951.2 :1085487-1090825 | q1 | q2  | OK     | 82.6696  | 25.1031   | -1.71949          | 2.00246      | 0.0452349 | 0.997376  |
| gene1066 | gene1066 | purN      | gi 57650036 ref NC_002951.2 :1090827-1091394 | q1 | q2  | OK     | 61.422   | 22.346    | -1.45874          | 2.91119      | 0.0036006 | 0.20595   |
| gene1067 | gene1067 | purH      | gi 57650036 ref NC_002951.2 :1091408-1092887 | q1 | q2  | OK     | 47.4631  | 21.2594   | -1.15871          | 2.59288      | 0.0095175 | 0.432418  |
| gene1082 | gene1082 | SACOL1097 | gi 57650036 ref NC_002951.2 :1107647-1107827 | q1 | q2  | OK     | 81.8319  | 312.72    | 1.93414           | -2.78383     | 0.0053721 | 0.28122   |
| gene115  | gene115  | SACOL0119 | gi 57650036 ref NC_002951.2 :134365-135091   | q1 | q2  | OK     | 26.663   | 8.84394   | -1.59208          | 2.96896      | 0.0029881 | 0.194471  |
| gene1290 | gene1290 | SACOL1310 | gi 57650036 ref NC_002951.2 :1327296-1327590 | q1 | q2  | OK     | 7.23585  | 0         | 1.79769e+308      | 1.79769e+308 | 0.0189988 | 0.699884  |
| gene1375 | gene1375 | SACOL1400 | gi 57650036 ref NC_002951.2 :1410031-1411294 | q1 | q2  | OK     | 64.773   | 23.4976   | -1.46288          | 3.26784      | 0.0010837 | 0.100519  |
| gene144  | gene144  | cap50     | gi 57650036 ref NC_002951.2 :167488-168751   | q1 | q2  | OK     | 11.5531  | 24.3679   | 1.07671           | -2.22587     | 0.0260228 | 0.870319  |
| gene150  | gene150  | SACOL0156 | gi 57650036 ref NC_002951.2 :174334-174538   | q1 | q2  | OK     | 617.616  | 1478.68   | 1.25953           | -2.71641     | 0.0065994 | 0.318806  |
| gene151  | gene151  | SACOL0157 | gi 57650036 ref NC_002951.2 :174716-175229   | q1 | q2  | OK     | 7.23362  | 64.6596   | 3.16008           | -5.26743     | 1.38E-07  | 4.16E-05  |
| gene152  | gene152  | SACOL0158 | gi 57650036 ref NC_002951.2 :175570-178057   | q1 | q2  | OK     | 2.2321   | 9.56676   | 2.09963           | -3.52082     | 0.0004302 | 0.0545232 |
| gene154  | gene154  | SACOL0160 | gi 57650036 ref NC_002951.2 :178069-179101   | q1 | q2  | OK     | 1.21303  | 7.55108   | 2.63807           | -3.60233     | 0.0003154 | 0.0421911 |
| gene1540 | gene1540 | SACOL1574 | gi 57650036 ref NC_002951.2 :1609249-1609591 | q1 | q2  | OK     | 0        | 4.80774   | 1.79769e+308      | 1.79769e+308 | 0.0237338 | 0.820442  |
| gene1546 | gene1546 | SACOL1580 | gi 57650036 ref NC_002951.2 :1617073-1617457 | q1 | q2  | OK     | 5.08307  | 0.45905   | -3.46898          | 2.0703       | 0.0384247 | 0.997376  |
| gene164  | gene164  | rocD1     | gi 57650036 ref NC_002951.2 :194969-196154   | q1 | q2  | OK     | 2.24998  | 0.627215  | -1.84288          | 2.09483      | 0.0361862 | 0.997376  |
| gene1670 | gene1670 | SACOL1705 | gi 57650036 ref NC_002951.2 :1735392-1735866 | q1 | q2  | OK     | 110.092  | 25.4647   | -2.11214          | 4.19816      | 2.69E-05  | 0.0053999 |
| gene1742 | gene1742 | SACOL1781 | gi 57650036 ref NC_002951.2 :1821377-1824065 | q1 | q2  | OK     | 5.2721   | 2.14228   | -1.29923          | 2.46731      | 0.0136131 | 0.565178  |
| gene1750 | gene1750 | SACOL1789 | gi 57650036 ref NC_002951.2 :1835215-1835707 | q1 | q2  | OK     | 1743.21  | 3504.01   | 1.00727           | -2.18912     | 0.0285878 | 0.899141  |
| gene1778 | gene1778 | ribH      | gi 57650036 ref NC_002951.2 :1872608-1873073 | q1 | q2  | OK     | 5.46259  | 27.6383   | 2.33901           | -3.44279     | 0.0005757 | 0.066019  |
| gene1779 | gene1779 | ribBA     | gi 57650036 ref NC_002951.2 :1873085-1874267 | q1 | q2  | OK     | 6.87334  | 28.2343   | 2.03836           | -4.0523      | 5.07E-05  | 0.0093944 |
| gene1780 | gene1780 | ribE      | gi 57650036 ref NC_002951.2 :1874277-1874910 | q1 | q2  | OK     | 9.42674  | 29.4189   | 1.64191           | -3.00321     | 0.0026715 | 0.182142  |
| gene1781 | gene1781 | ribD      | gi 57650036 ref NC_002951.2 :1874916-1875960 | q1 | q2  | OK     | 8.2495   | 35.6421   | 2.1112            | -4.22408     | 2.40E-05  | 0.0052521 |
| gene179  | gene179  | SACOL0185 | gi 57650036 ref NC_002951.2 :216034-217342   | q1 | q2  | OK     | 4.2684   | 12.7215   | 1.57551           | -2.95729     | 0.0031035 | 0.196667  |

|          |          |           |                                              |    |    |    |         |          |              |              |              |              |           |          |
|----------|----------|-----------|----------------------------------------------|----|----|----|---------|----------|--------------|--------------|--------------|--------------|-----------|----------|
| gene180  | gene180  | SACOL0186 | gi 57650036 ref NC_002951.2 :217347-218511   | q1 | q2 | OK | 2.61306 | 10.1792  | 1.96181      | -3.28631     | 0.0010151    | 0.100519     |           |          |
| gene1801 | gene1801 | SACOL1840 | gi 57650036 ref NC_002951.2 :1895718-1896949 | q1 | q2 | OK | 8.17502 | 19.9514  | 1.2872       | -1.98346     | 0.0473165    | 0.997376     |           |          |
| gene181  | gene181  | SACOL0187 | gi 57650036 ref NC_002951.2 :218527-220303   | q1 | q2 | OK | 2.99295 | 7.33441  | 1.29311      | -2.41        | 0.0159526    | 0.629736     |           |          |
| gene182  | gene182  | ggt       | gi 57650036 ref NC_002951.2 :220340-222347   | q1 | q2 | OK | 2.71925 | 7.65342  | 1.4929       | -2.81507     | 0.0048766    | 0.260952     |           |          |
| gene1824 | gene1824 | SACOL1865 | gi 57650036 ref NC_002951.2 :1917446-1918163 | q1 | q2 | OK | 0       | 1.22101  | 1.79769e+308 | 1.79769e+308 | 0.0237338    | 0.820442     |           |          |
| gene1880 | gene1880 | SACOL1915 | gi 57650036 ref NC_002951.2 :1969006-1971179 | q1 | q2 | OK | 95.0866 | 3.42721  | -4.79413     | 6.32973      | 2.46E-10     | 1.48E-07     |           |          |
| gene1881 | gene1881 | SACOL1916 | gi 57650036 ref NC_002951.2 :1969006-1971179 | q1 | q2 | OK | 47.0631 | 1.40474  | -5.06622     | 6.87693      | 6.12E-12     | 7.36E-09     |           |          |
| gene1927 | gene1927 | SACOL1932 | gi 57650036 ref NC_002951.2 :1996765-1997575 | q1 | q2 | OK | 121.969 | 36.7394  | -1.73111     | 3.85058      | 0.0001178    | 0.0177348    |           |          |
| gene198  | gene198  | pflB      | gi 57650036 ref NC_002951.2 :239820-242070   | q1 | q2 | OK | 28.4022 | 9.93663  | -1.51518     | 3.34499      | 0.0008229    | 0.090065     |           |          |
| gene1992 | gene1992 | SACOL1998 | gi 57650036 ref NC_002951.2 :2058954-2059131 | q1 | q2 | OK | 50.9989 | 0        | -            | -            | 1.79769e+308 | 1.79769e+308 | 0.0152916 | 0.613703 |
| gene1998 | gene1998 | SACOL2006 | gi 57650036 ref NC_002951.2 :2065993-2067049 | q1 | q2 | OK | 2.59298 | 0.633769 | -2.03258     | 2.24322      | 0.0248829    | 0.843917     |           |          |
| gene2040 | gene2040 | rrfE      | gi 57650036 ref NC_002951.2 :2112006-2112121 | q1 | q2 | OK | 957814  | 422847   | -1.17961     | 2.71539      | 0.0066197    | 0.318806     |           |          |
| gene2165 | gene2165 | SACOL2164 | gi 57650036 ref NC_002951.2 :2242248-2243619 | q1 | q2 | OK | 60.9818 | 6.8988   | -3.14396     | 6.62562      | 3.46E-11     | 2.78E-08     |           |          |
| gene2168 | gene2168 | SACOL2167 | gi 57650036 ref NC_002951.2 :2245862-2246846 | q1 | q2 | OK | 19.0659 | 9.31546  | -1.0333      | 2.02476      | 0.0428922    | 0.997376     |           |          |
| gene2276 | gene2276 | SACOL2278 | gi 57650036 ref NC_002951.2 :2339059-2340214 | q1 | q2 | OK | 22.7918 | 90.9592  | 1.9967       | -4.44533     | 8.78E-06     | 0.0021132    |           |          |
| gene2354 | gene2354 | SACOL2357 | gi 57650036 ref NC_002951.2 :2415466-2417187 | q1 | q2 | OK | 10.0183 | 3.44046  | -1.54197     | 2.38666      | 0.0170022    | 0.649864     |           |          |
| gene2382 | gene2382 | SACOL2386 | gi 57650036 ref NC_002951.2 :2444801-2445971 | q1 | q2 | OK | 6.64764 | 2.30965  | -1.52516     | 2.4415       | 0.0146264    | 0.596957     |           |          |
| gene2395 | gene2395 | nirR      | gi 57650036 ref NC_002951.2 :2460980-2461712 | q1 | q2 | OK | 7.06665 | 2.66637  | -1.40615     | 1.9767       | 0.0480761    | 0.997376     |           |          |
| gene2430 | gene2430 | SACOL2436 | gi 57650036 ref NC_002951.2 :2494042-2494702 | q1 | q2 | OK | 181.216 | 66.9372  | -1.43683     | 3.24863      | 0.0011596    | 0.103422     |           |          |
| gene2558 | gene2558 | SACOL2571 | gi 57650036 ref NC_002951.2 :2632805-2632997 | q1 | q2 | OK | 438.985 | 127.355  | -1.78532     | 3.01587      | 0.0025624    | 0.182142     |           |          |
| gene2638 | gene2638 | arcD      | gi 57650036 ref NC_002951.2 :2715887-2717318 | q1 | q2 | OK | 6.53359 | 1.99809  | -1.70925     | 2.82087      | 0.0047894    | 0.260952     |           |          |
| gene2639 | gene2639 | arcB2     | gi 57650036 ref NC_002951.2 :2717408-2718419 | q1 | q2 | OK | 4.73033 | 0.861358 | -2.45726     | 2.99739      | 0.0027231    | 0.182142     |           |          |
| gene2640 | gene2640 | arcA      | gi 57650036 ref NC_002951.2 :2718451-2719687 | q1 | q2 | OK | 2.33253 | 0.446736 | -2.3844      | 2.55715      | 0.0105533    | 0.470598     |           |          |
| gene2643 | gene2643 | isaB      | gi 57650036 ref NC_002951.2 :2722802-2723330 | q1 | q2 | OK | 0       | 1.48187  | 1.79769e+308 | 1.79769e+308 | 0.0353804    | 0.997376     |           |          |
| gene2675 | gene2675 | SACOL2693 | gi 57650036 ref NC_002951.2 :2767031-2767097 | q1 | q2 | OK | 0       | 1.17E+06 | 1.79769e+308 | 1.79769e+308 | 0.0287516    | 0.899141     |           |          |
| gene2699 | gene2699 | SACOL2717 | gi 57650036 ref NC_002951.2 :2788687-2789152 | q1 | q2 | OK | 15.6074 | 34.7808  | 1.15606      | -2.07716     | 0.0377865    | 0.997376     |           |          |
| gene2704 | gene2704 | SACOL2722 | gi 57650036 ref NC_002951.2 :2794352-2795147 | q1 | q2 | OK | 0       | 2.90017  | 1.79769e+308 | 1.79769e+308 | 0.0035771    | 0.20595      |           |          |
| gene2705 | gene2705 | SACOL2723 | gi 57650036 ref NC_002951.2 :2795280-2795793 | q1 | q2 | OK | 36.8257 | 93.2241  | 1.33999      | -2.76651     | 0.0056659    | 0.290289     |           |          |
| gene328  | gene328  | SACOL0340 | gi 57650036 ref NC_002951.2 :364083-367357   | q1 | q2 | OK | 111.797 | 42.3998  | -1.39875     | 2.92258      | 0.0034715    | 0.20595      |           |          |
| gene379  | gene379  | SACOL0391 | gi 57650036 ref NC_002951.2 :398649-399477   | q1 | q2 | OK | 2.74264 | 6.97981  | 1.34762      | -1.99774     | 0.0457446    | 0.997376     |           |          |
| gene392  | gene392  | SACOL0404 | gi 57650036 ref NC_002951.2 :410847-411267   | q1 | q2 | OK | 32.0939 | 10.9996  | -1.54484     | 2.4818       | 0.0130721    | 0.562101     |           |          |

|         |         |             |                                            |    |    |    |         |          |          |          |           |           |
|---------|---------|-------------|--------------------------------------------|----|----|----|---------|----------|----------|----------|-----------|-----------|
| gene393 | gene393 | SACOL0405   | gi 57650036 ref NC_002951.2 :411373-412729 | q1 | q2 | OK | 2.87146 | 0.865442 | -1.73027 | 2.25954  | 0.0238501 | 0.820442  |
| gene395 | gene395 | glpT        | gi 57650036 ref NC_002951.2 :413355-414714 | q1 | q2 | OK | 20.3081 | 9.02995  | -1.16927 | 2.38712  | 0.016981  | 0.649864  |
| gene423 | gene423 | SACOL0436   | gi 57650036 ref NC_002951.2 :442258-442450 | q1 | q2 | OK | 1206.14 | 423.269  | -1.51076 | 3.0693   | 0.0021456 | 0.169372  |
| gene428 | gene428 | SACOL0441   | gi 57650036 ref NC_002951.2 :445050-445598 | q1 | q2 | OK | 2.35883 | 0.231845 | -3.34684 | 1.98647  | 0.0469809 | 0.997376  |
| gene457 | gene457 | SACOL0470   | gi 57650036 ref NC_002951.2 :472308-473367 | q1 | q2 | OK | 2.81871 | 0.090214 | -4.96555 | 3.06449  | 0.0021805 | 0.169372  |
| gene487 | gene487 | SACOL0502   | gi 57650036 ref NC_002951.2 :502701-504742 | q1 | q2 | OK | 2.97    | 35.1996  | 3.56703  | -3.68364 | 0.0002299 | 0.0325684 |
| gene488 | gene488 | SACOL0503   | gi 57650036 ref NC_002951.2 :502701-504742 | q1 | q2 | OK | 8.12246 | 75.0115  | 3.20712  | -6.01337 | 1.82E-09  | 8.75E-07  |
| gene491 | gene491 | SACOL0506   | gi 57650036 ref NC_002951.2 :506760-507603 | q1 | q2 | OK | 12.7583 | 41.7176  | 1.70922  | -3.4443  | 0.0005725 | 0.066019  |
| gene511 | gene511 | rrfA        | gi 57650036 ref NC_002951.2 :534059-534174 | q1 | q2 | OK | 303344  | 1.02E+06 | 1.74798  | -4.03379 | 5.49E-05  | 0.0094402 |
| gene552 | gene552 | rrfG        | gi 57650036 ref NC_002951.2 :572451-572566 | q1 | q2 | OK | 353954  | 869158   | 1.29606  | -3.00376 | 0.0026667 | 0.182142  |
| gene560 | gene560 | rrfC        | gi 57650036 ref NC_002951.2 :582839-582954 | q1 | q2 | OK | 252106  | 114662   | -1.13664 | 2.60738  | 0.0091238 | 0.422501  |
| gene594 | gene594 | SACOL0597   | gi 57650036 ref NC_002951.2 :622422-623301 | q1 | q2 | OK | 473.489 | 1270.59  | 1.4241   | -3.13317 | 0.0017293 | 0.143589  |
| gene617 | gene617 | proP        | gi 57650036 ref NC_002951.2 :652801-654202 | q1 | q2 | OK | 186.041 | 458.711  | 1.30197  | -2.90456 | 0.0036777 | 0.20595   |
| gene622 | gene622 | SACOL0625   | gi 57650036 ref NC_002951.2 :658075-658243 | q1 | q2 | OK | 2539.65 | 372.825  | -2.76806 | 5.16068  | 2.46E-07  | 6.58E-05  |
| gene635 | gene635 | SACOL0638   | gi 57650036 ref NC_002951.2 :670079-671156 | q1 | q2 | OK | 23.9217 | 48.3955  | 1.01655  | -2.20746 | 0.0272823 | 0.899141  |
| gene674 | gene674 | SACOL0678   | gi 57650036 ref NC_002951.2 :703024-703585 | q1 | q2 | OK | 28.9634 | 68.4476  | 1.24077  | -2.53102 | 0.0113732 | 0.497938  |
| gene7   | gene7   | hutH        | gi 57650036 ref NC_002951.2 :10919-12434   | q1 | q2 | OK | 7.10649 | 17.6313  | 1.31093  | -2.6558  | 0.007912  | 0.373572  |
| gene731 | gene731 | SACOL0739   | gi 57650036 ref NC_002951.2 :760824-761367 | q1 | q2 | OK | 8.0803  | 18.8362  | 1.22103  | -2.02048 | 0.043334  | 0.997376  |
| gene775 | gene775 | SACOL0786   | gi 57650036 ref NC_002951.2 :809586-809748 | q1 | q2 | OK | 53.4924 | 1342.74  | 4.6497   | -5.46266 | 4.69E-08  | 1.61E-05  |
| gene780 | gene780 | SACOL0790.1 | gi 57650036 ref NC_002951.2 :814957-815224 | q1 | q2 | OK | 296.784 | 106.465  | -1.47904 | 2.93146  | 0.0033737 | 0.20595   |
| gene848 | gene848 | empbp       | gi 57650036 ref NC_002951.2 :885541-886564 | q1 | q2 | OK | 1.96233 | 0.471357 | -2.05767 | 2.04393  | 0.0409603 | 0.997376  |
| gene889 | gene889 | SACOL0901   | gi 57650036 ref NC_002951.2 :913514-913856 | q1 | q2 | OK | 42.7695 | 15.6252  | -1.45271 | 2.26743  | 0.0233642 | 0.820442  |
| gene890 | gene890 | SACOL0902   | gi 57650036 ref NC_002951.2 :913867-914446 | q1 | q2 | OK | 48.3523 | 14.6081  | -1.72681 | 3.3048   | 0.0009505 | 0.0995085 |
| gene891 | gene891 | SACOL0903   | gi 57650036 ref NC_002951.2 :914463-914682 | q1 | q2 | OK | 256.091 | 103.476  | -1.30735 | 2.34196  | 0.0191829 | 0.699884  |
| gene93  | gene93  | sirC        | gi 57650036 ref NC_002951.2 :110431-112422 | q1 | q2 | OK | 67.4843 | 216.919  | 1.68453  | -3.89536 | 9.81E-05  | 0.0157411 |
| gene950 | gene950 | argH        | gi 57650036 ref NC_002951.2 :965545-968120 | q1 | q2 | OK | 185.8   | 5.15016  | -5.17299 | 9.19978  | 0         | 0         |
| gene951 | gene951 | argG        | gi 57650036 ref NC_002951.2 :965545-968120 | q1 | q2 | OK | 103.019 | 1.22764  | -6.39088 | 5.96033  | 2.52E-09  | 1.01E-06  |
| gene965 | gene965 | clpB        | gi 57650036 ref NC_002951.2 :986246-988856 | q1 | q2 | OK | 183.706 | 67.4742  | -1.44499 | 3.26742  | 0.0010853 | 0.100519  |

**Supplementary Table S16. The results of MRSA drug susceptibility tests by K-B methods**

| Antibiotics                   | Paper content | Bacteriostatic circle's diameter in CLSI (mm) |       |     | Bacteriostatic circle's diameter in tests (mm) | Test results |
|-------------------------------|---------------|-----------------------------------------------|-------|-----|------------------------------------------------|--------------|
|                               |               | S                                             | I     | R   |                                                |              |
| Amikacin                      | 30 µg         | ≥17                                           | 15-16 | ≤14 | 6                                              | Resistant    |
| Trimethoprim-sulfamethoxazole | 1.25/23.75 µg | ≥16                                           | 11-15 | ≤10 | 6                                              | Resistant    |
| Erythromycin                  | 15 µg         | ≥23                                           | 14-22 | ≤13 | 6                                              | Resistant    |
| Clindamycin                   | 2 µg          | ≥21                                           | 15-20 | ≤15 | 6                                              | Resistant    |
| linezolid                     | 30 µg         | ≥21                                           | -     | ≤20 | 30                                             | Resistant    |
| Piperacillin/tazobactam       | 100/10 µg     | ≥18                                           | -     | ≤17 | 13                                             | Resistant    |
| Gentamicin                    | 10 µg         | ≥15                                           | 13-14 | ≤12 | 6                                              | Resistant    |
| Penicillin                    | 10 U          | ≥29                                           | -     | ≤28 | 6                                              | Resistant    |
| Cefepime                      | 30 µg         | ≥18                                           | 15-17 | ≤14 | 6                                              | Resistant    |
| Cefoxitin                     | 30 µg         | ≥18                                           | 15-17 | ≤14 | 8                                              | Resistant    |
| Cefazolin                     | 30 µg         | ≥18                                           | 15-17 | ≤14 | 6                                              | Resistant    |
| Teicoplanin                   | 30 µg         | ≥14                                           | 11-13 | ≤11 | 16                                             | Susceptible  |
| Vancomycin                    | -             | -                                             | -     | -   | -                                              | Susceptible  |
| Levofloxacin                  | 5 µg          | ≥19                                           | 16-18 | ≤15 | 16                                             | Middle       |

**Supplementary Table S17. Sequences of oligonucleotide primers used for real-time RT-PCR**

| <b>Primer</b>  | <b>Gene</b>  | <b>Oligonucleotide primer sequence (5'—3')</b> | <b>Reference</b> |
|----------------|--------------|------------------------------------------------|------------------|
| <i>sdrD</i> F  | <i>sdrD</i>  | AAAGGCGTTGGCAATGTAAC                           | 38               |
| <i>sdrD</i> R  | <i>sdrD</i>  | GCCGTTTGAATCTAATTCTTCG                         |                  |
| <i>spa</i> F   | <i>spa</i>   | GCAAACGGCACTACTGCTGA                           | 39               |
| <i>spa</i> R   | <i>spa</i>   | CACCAGTTTCTGGTAATGCTTGAG                       |                  |
| <i>hld</i> F   | <i>hld</i>   | AAGAATTTTTATCTTAATTAAGGAAGGAGTG                | 40, 41           |
| <i>hld</i> R   | <i>hld</i>   | TTAGTGAATTTGTTCACTGTGTCGA                      |                  |
| <i>agrA</i> F  | <i>agrA</i>  | TGATAATCCTTATGAGGTGCTT                         | 42, 43           |
| <i>agrA</i> R  | <i>agrA</i>  | CACTGTGACTCGTAACGAAAA                          |                  |
| <i>cap5B</i> F | <i>cap5B</i> | GCGATATGCGTAAGCCAACA                           | 44               |
| <i>cap5B</i> R | <i>cap5B</i> | CAGATGGATTTGGAGGTACAGG                         |                  |
| <i>cap5C</i> F | <i>cap5C</i> | CATCCAGAGCGGAATAAAGC                           | 45               |
| <i>cap5C</i> R | <i>cap5C</i> | GTGTTATGCGCATCTGAACC                           |                  |
| pMD18T-GFP F   | GFP          | GGATCCATGAGTAAAGGAGAAGAAC                      |                  |
| pMD18T-GFP R   | GFP          | AAGCTTTTATTTGTATAGTTCATCCATGCC                 |                  |

**Supplementary Table S18. The data associated with Boxplots of the expression distribution for MRSA all genes with different compounds under different conditions, related to Supplementary Figure S4**

|                              | <b>MR100vsM18C06</b> |               | <b>MU30vsM18C06</b> |               | <b>MVRvsMR150vsM36C05</b> |              |               |
|------------------------------|----------------------|---------------|---------------------|---------------|---------------------------|--------------|---------------|
|                              | <b>MR100</b>         | <b>M18C06</b> | <b>MU30</b>         | <b>M18C06</b> | <b>MVR</b>                | <b>MR150</b> | <b>M36C05</b> |
| 5 th percentile              | 0.7403058            | 0.9695557     | -0.198621           | 0.8719884     | -0.5841289                | -0.6710824   | -0.488285     |
| 25 th percentile             | 1.6348187            | 1.653404      | 1.280856            | 1.5558366     | 0.8839708                 | 0.9061994    | 0.8998741     |
| Median                       | 1.9170176            | 1.8515481     | 1.833599            | 1.7539804     | 1.4564025                 | 1.5059337    | 1.4566662     |
| 75 th percentile             | 2.2450757            | 2.1119929     | 2.283387            | 2.014426      | 1.9040801                 | 1.9644253    | 1.9578672     |
| 95 th percentile             | 3.1588056            | 2.7945968     | 3.775821            | 2.6970296     | 3.4186178                 | 3.5233861    | 3.5234122     |
| The number of outlier points | 81                   | 134           | 48                  | 134           | 37                        | 41           | 37            |

5 th percentile, bottom edge of vertical line; 25th percentile, bottom edge of box; median, black line; 75th percentile, top edge of box; 95th percentile, top edge of vertical line; and outlier points, above and below the vertical lines.

## References

36. Wu, L. S. *et al.* Cytotoxic polyphenols against breast tumor cell in *Smilax china* L. *J Ethnopharmacol* **130**, 460-464 (2010).
37. Brackman, G., Hillaert, U., Van Calenbergh, S., Nelis, H. J. & Coenye, T. Use of quorum sensing inhibitors to interfere with biofilm formation and development in *Burkholderia multivorans* and *Burkholderia cenocepacia*. *Res Microbiol* **160**, 144-151 (2009).
38. Korem, M., Gov, Y., Kiran, M. D. & Balaban, N. Transcriptional profiling of target of RNAIII-activating protein, a master regulator of staphylococcal virulence. *Infect Immun* **73**, 6220-6228 (2005).
39. Merino, N. *et al.* Protein A-mediated multicellular behavior in *Staphylococcus aureus*. *J Bacteriol* **191**, 832-843 (2009).
40. Jarraud, S. *et al.* Relationships between *Staphylococcus aureus* genetic background, virulence factors, *agr* groups (alleles), and human disease. *Infect Immun* **70**, 631-641 (2002).
41. Delgado, S. *et al.* Characterization of *Staphylococcus aureus* strains involved in human and bovine mastitis. *FEMS Immunol Med Microbiol* **62**, 225-235 (2011).
42. Leng, B. F. *et al.* Allicin reduces the production of alpha-toxin by *Staphylococcus aureus*. *Molecules* **16**, 7958-7968 (2011).
43. Qiu, J. *et al.* Subinhibitory concentrations of perilla oil affect the expression of secreted virulence factor genes in *Staphylococcus aureus*. *PLoS One* **6**, e16160 (2011).
44. Price-Whelan, A. *et al.* Transcriptional profiling of *Staphylococcus aureus* during growth in 2 M NaCl leads to clarification of physiological roles for Kdp and Ktr K<sup>+</sup> uptake systems. *MBio* **4**, e00407-13 (2013).



45. Smith, K. *et al.* Influence of tigecycline on expression of virulence factors in biofilm-associated cells of methicillin-resistant *Staphylococcus aureus*. *Antimicrob Agents Chemother* **54**, 380-387 (2010).
